# Supplementary material
Source: PubMed Central journal article supplement (PMC3418720)
Supplement: supp_blood-2012-02-410407_blood-2012-02-410407-1.pdf [file supp_blood-2012-02-410407_blood-2012-02-410407-1.pdf]

Supplementary Figure 1

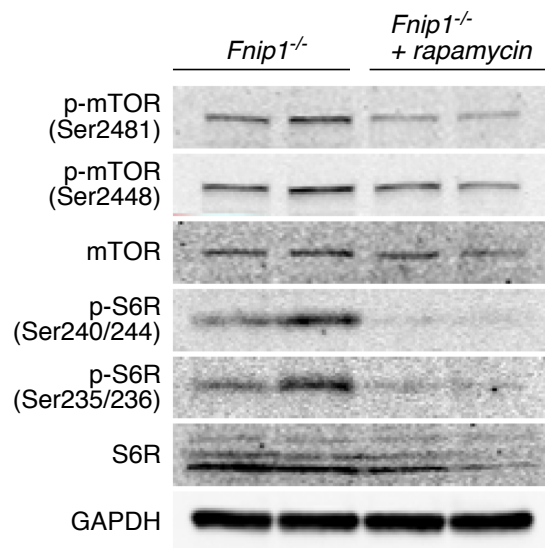

**Figure S1:** Western blot analysis of kidney cells isolated from *Fnip1*<sup>-/-</sup> or *Fnip1*<sup>-/-</sup> mice injected intraperitoneally with 2 mg/kg of rapamycin. Antibodies were specific for mTOR, phosphorylated serines 2481 and 2448 of mTOR, S6R, phosphorylated serines 240/244 and 235/236 of S6R, and GAPDH control.

## Supplementary Figure 2

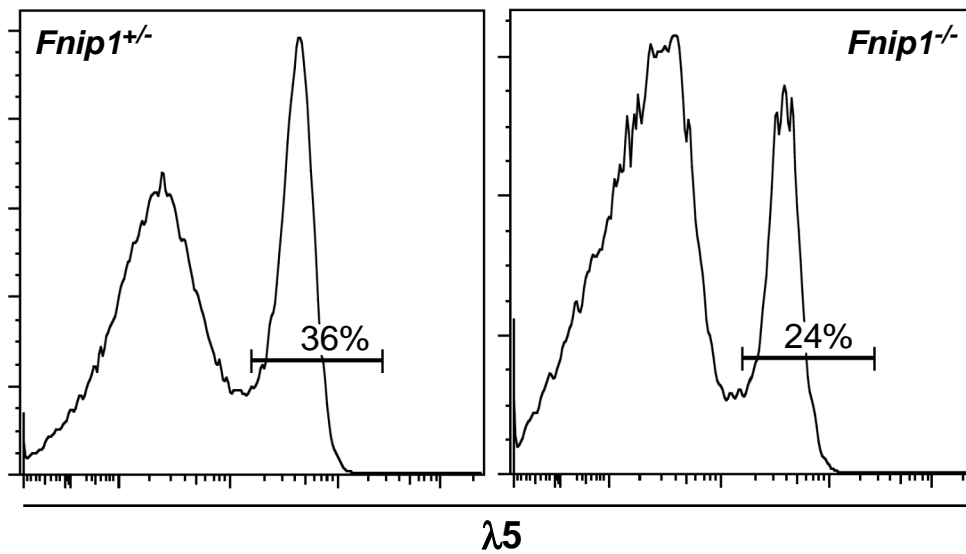

**Figure S2:** Flow cytometry analysis of lambda5 expression in pro-B cells (B220+CD25-IgM-) from *Fnip1<sup>+/-</sup>* and *Fnip1<sup>-/-</sup>* mice. Cells were stained with anti-CD25, IgM, B220, and intracellularly with anti- $\lambda 5$ .

**Table S1:** transcriptome analysis of *Fnip1*<sup>+/+</sup> and *Fnip1*<sup>-/-</sup> pro-B cells (fractions C+C')  
 FPKM units = fragments sequenced per kilobase per million  
 Statistical significance (q values) was calculated with Cuffdiff (Cufflinks suite)

| Gene     | <i>Fnip1</i> <sup>+/+</sup> (FPKM) | <i>Fnip1</i> <sup>-/-</sup> (FPKM) | log2 fold change | q value  | Significant |
|----------|------------------------------------|------------------------------------|------------------|----------|-------------|
| Ccr9     | 0.80                               | 62.41                              | 6.29             | 0.00E+00 | yes         |
| Gng4     | 0.23                               | 17.11                              | 6.22             | 0.00E+00 | yes         |
| Pgf      | 0.33                               | 22.35                              | 6.08             | 0.00E+00 | yes         |
| Il18r1   | 0.54                               | 20.26                              | 5.23             | 0.00E+00 | yes         |
| Nyx      | 3.03                               | 88.54                              | 4.87             | 0.00E+00 | yes         |
| Hpgds    | 0.37                               | 10.58                              | 4.86             | 0.00E+00 | yes         |
| Bhlhe40  | 1.12                               | 26.18                              | 4.55             | 0.00E+00 | yes         |
| Atp8a2   | 0.28                               | 5.48                               | 4.29             | 0.00E+00 | yes         |
| Cd33     | 0.49                               | 9.15                               | 4.23             | 0.00E+00 | yes         |
| Myl10    | 9.34                               | 166.23                             | 4.15             | 0.00E+00 | yes         |
| Myof     | 0.40                               | 5.69                               | 3.84             | 0.00E+00 | yes         |
| Prodh    | 2.85                               | 39.90                              | 3.81             | 0.00E+00 | yes         |
| Cxcr5    | 3.92                               | 47.94                              | 3.61             | 0.00E+00 | yes         |
| Al661453 | 0.57                               | 6.49                               | 3.50             | 0.00E+00 | yes         |
| Ppargc1a | 0.85                               | 7.60                               | 3.16             | 0.00E+00 | yes         |
| Ehd3     | 1.18                               | 10.22                              | 3.12             | 0.00E+00 | yes         |
| Lzts2    | 2.01                               | 17.07                              | 3.09             | 0.00E+00 | yes         |
| Wnk2     | 0.63                               | 5.21                               | 3.06             | 0.00E+00 | yes         |
| Dnase1l3 | 1.59                               | 12.68                              | 3.00             | 0.00E+00 | yes         |
| Tcf7     | 4.44                               | 34.77                              | 2.97             | 0.00E+00 | yes         |
| Sulf2    | 2.89                               | 19.54                              | 2.76             | 0.00E+00 | yes         |
| Prkch    | 6.76                               | 40.37                              | 2.58             | 0.00E+00 | yes         |
| Tns1     | 1.39                               | 7.50                               | 2.43             | 0.00E+00 | yes         |
| Bcar3    | 6.43                               | 33.26                              | 2.37             | 0.00E+00 | yes         |
| Socs2    | 16.40                              | 79.99                              | 2.29             | 0.00E+00 | yes         |
| Dgcr6    | 11.92                              | 56.01                              | 2.23             | 0.00E+00 | yes         |
| Rragd    | 10.33                              | 43.77                              | 2.08             | 0.00E+00 | yes         |
| Zc3h12d  | 8.61                               | 35.75                              | 2.05             | 0.00E+00 | yes         |
| Trf      | 15.13                              | 62.18                              | 2.04             | 0.00E+00 | yes         |
| Cd72     | 139.68                             | 55.85                              | -1.32            | 0.00E+00 | yes         |
| Fcrla    | 120.41                             | 44.69                              | -1.43            | 0.00E+00 | yes         |
| Ralgs2   | 25.24                              | 7.47                               | -1.76            | 0.00E+00 | yes         |

|              |       |        |            |          |     |
|--------------|-------|--------|------------|----------|-----|
| 9830001H06Ri | 6.81  | 1.25   | -2.45      | 0.00E+00 | yes |
| Cd74         | 55.50 | 10.06  | -2.46      | 0.00E+00 | yes |
| Cpm          | 31.09 | 4.90   | -2.66      | 0.00E+00 | yes |
| Cd22         | 38.66 | 5.06   | -2.93      | 0.00E+00 | yes |
| Klf2         | 24.46 | 2.50   | -3.29      | 0.00E+00 | yes |
| Il2ra        | 10.88 | 1.03   | -3.40      | 0.00E+00 | yes |
| Gas7         | 28.37 | 2.08   | -3.77      | 0.00E+00 | yes |
| Rasgrp1      | 11.95 | 0.83   | -3.85      | 0.00E+00 | yes |
| Adam19       | 9.24  | 0.51   | -4.17      | 0.00E+00 | yes |
| Tbc1d24      | 0.00  | 6.26   | 1.79769e+  | 2.07E-20 | yes |
| Mrgpre       | 4.53  | 20.35  | 2.17       | 7.34E-14 | yes |
| Lmo4         | 77.08 | 22.82  | -1.76      | 7.34E-14 | yes |
| Serpina3g    | 0.91  | 11.41  | 3.65       | 2.87E-13 | yes |
| Kremen1      | 6.25  | 22.41  | 1.84       | 3.43E-13 | yes |
| Ciita        | 6.96  | 0.90   | -2.95      | 3.43E-13 | yes |
| Serpina3f    | 1.81  | 17.40  | 3.27       | 4.03E-13 | yes |
| Csf2rb       | 3.31  | 14.98  | 2.18       | 5.93E-13 | yes |
| Gpr12        | 10.38 | 0.50   | -4.38      | 6.46E-13 | yes |
| Dtx4         | 1.14  | 7.09   | 2.64       | 7.45E-13 | yes |
| Ms4a1        | 21.63 | 3.33   | -2.70      | 7.45E-13 | yes |
| Dclk2        | 6.35  | 0.00   | -1.79769e- | 9.09E-13 | yes |
| Fzd6         | 3.37  | 16.14  | 2.26       | 1.20E-12 | yes |
| Tcirg1       | 61.93 | 136.34 | 1.14       | 1.23E-12 | yes |
| Tmem90a      | 0.30  | 6.14   | 4.37       | 1.44E-12 | yes |
| Blk          | 57.86 | 17.44  | -1.73      | 1.70E-12 | yes |
| Cish         | 2.54  | 16.89  | 2.73       | 2.17E-12 | yes |
| Aldh3b1      | 5.53  | 27.45  | 2.31       | 2.63E-12 | yes |
| Sell         | 50.92 | 15.28  | -1.74      | 3.93E-12 | yes |
| Lat          | 15.00 | 58.02  | 1.95       | 4.55E-12 | yes |
| Slc45a4      | 9.45  | 27.66  | 1.55       | 4.74E-12 | yes |
| Tnfrsf26     | 5.38  | 24.44  | 2.18       | 4.76E-12 | yes |
| Mpzl2        | 0.22  | 4.71   | 4.39       | 7.97E-12 | yes |
| Epcam        | 0.22  | 6.61   | 4.94       | 1.23E-11 | yes |
| Btla         | 9.32  | 1.33   | -2.81      | 1.23E-11 | yes |
| Cul9         | 1.82  | 7.49   | 2.04       | 1.82E-11 | yes |
| Gsn          | 58.62 | 19.59  | -1.58      | 1.96E-11 | yes |
| Tnk2         | 23.06 | 7.95   | -1.54      | 2.84E-11 | yes |
| Kcnf1        | 0.11  | 2.77   | 4.64       | 3.75E-11 | yes |
| Ltb          | 13.62 | 55.33  | 2.02       | 7.18E-11 | yes |
| Vipr1        | 0.08  | 2.79   | 5.08       | 8.35E-11 | yes |
| Klhl14       | 2.98  | 0.23   | -3.68      | 1.02E-10 | yes |
| Ikzf3        | 53.46 | 17.58  | -1.60      | 1.92E-10 | yes |

|              |        |        |            |          |     |
|--------------|--------|--------|------------|----------|-----|
| Prss23       | 0.64   | 5.62   | 3.13       | 2.88E-10 | yes |
| Gns          | 18.19  | 49.39  | 1.44       | 3.11E-10 | yes |
| Sh2d5        | 7.97   | 26.97  | 1.76       | 3.29E-10 | yes |
| Grap2        | 6.17   | 22.23  | 1.85       | 3.86E-10 | yes |
| Pik3c2b      | 10.50  | 3.15   | -1.74      | 3.90E-10 | yes |
| Hdac9        | 12.86  | 2.98   | -2.11      | 4.34E-10 | yes |
| Rpl3l        | 4.34   | 24.17  | 2.48       | 5.49E-10 | yes |
| Uap1l1       | 12.53  | 42.10  | 1.75       | 5.49E-10 | yes |
| H2-Eb1       | 11.27  | 1.71   | -2.72      | 5.50E-10 | yes |
| Pik3ip1      | 15.29  | 46.63  | 1.61       | 5.93E-10 | yes |
| Il33         | 7.30   | 0.00   | -1.79769e- | 5.96E-10 | yes |
| Csf2rb2      | 1.16   | 6.75   | 2.54       | 5.96E-10 | yes |
| Wls          | 13.82  | 40.87  | 1.56       | 6.34E-10 | yes |
| Hspa2        | 25.52  | 7.85   | -1.70      | 6.59E-10 | yes |
| Odz4         | 0.06   | 1.03   | 4.20       | 7.06E-10 | yes |
| Kynu         | 0.85   | 6.77   | 2.99       | 8.23E-10 | yes |
| 4922502D21Ri | 2.81   | 17.20  | 2.61       | 8.30E-10 | yes |
| Renbp        | 4.90   | 23.75  | 2.28       | 8.84E-10 | yes |
| Slc5a9       | 0.35   | 4.00   | 3.51       | 1.16E-09 | yes |
| Pcdh9        | 0.82   | 5.14   | 2.65       | 1.36E-09 | yes |
| 6720401G13Ri | 8.06   | 20.01  | 1.31       | 1.85E-09 | yes |
| Dennd2d      | 2.82   | 14.18  | 2.33       | 2.38E-09 | yes |
| Ppm1h        | 0.40   | 3.01   | 2.90       | 3.17E-09 | yes |
| Tmc7         | 2.69   | 10.76  | 2.00       | 3.22E-09 | yes |
| Gm5111       | 2.99   | 22.89  | 2.94       | 3.27E-09 | yes |
| Vpreb2       | 204.82 | 545.39 | 1.41       | 3.67E-09 | yes |
| Cd24a        | 549.06 | 209.94 | -1.39      | 4.21E-09 | yes |
| Rbm24        | 3.33   | 0.27   | -3.64      | 4.68E-09 | yes |
| Trib3        | 2.41   | 13.19  | 2.45       | 5.13E-09 | yes |
| 2010002M12R  | 0.18   | 3.04   | 4.10       | 5.50E-09 | yes |
| Slc17a9      | 15.00  | 43.22  | 1.53       | 5.51E-09 | yes |
| Pmepa1       | 0.14   | 1.98   | 3.85       | 5.93E-09 | yes |
| H2-Aa        | 28.15  | 5.96   | -2.24      | 6.71E-09 | yes |
| Reln         | 1.48   | 0.24   | -2.63      | 9.27E-09 | yes |
| Hck          | 5.19   | 0.66   | -2.98      | 9.27E-09 | yes |
| Slc8a1       | 0.00   | 0.97   | 1.79769e+  | 9.74E-09 | yes |
| Pfkfb4       | 2.06   | 9.41   | 2.19       | 1.19E-08 | yes |
| Cd69         | 10.06  | 37.08  | 1.88       | 1.20E-08 | yes |
| H2-Q7        | 23.72  | 61.87  | 1.38       | 1.29E-08 | yes |
| Il28ra       | 2.29   | 9.83   | 2.10       | 1.31E-08 | yes |
| Sgpl1        | 14.14  | 36.45  | 1.37       | 1.44E-08 | yes |
| Rps6kb1      | 19.43  | 43.73  | 1.17       | 1.48E-08 | yes |

|              |        |       |           |          |     |
|--------------|--------|-------|-----------|----------|-----|
| Fmn2         | 3.34   | 0.64  | -2.39     | 1.77E-08 | yes |
| Fmnl3        | 11.07  | 3.15  | -1.82     | 2.08E-08 | yes |
| Dst          | 2.04   | 5.19  | 1.35      | 2.30E-08 | yes |
| Inpp1        | 10.12  | 3.10  | -1.71     | 2.40E-08 | yes |
| Myl4         | 74.78  | 21.69 | -1.79     | 2.56E-08 | yes |
| Lgr5         | 25.46  | 9.30  | -1.45     | 2.89E-08 | yes |
| Gvin1        | 21.94  | 37.49 | 0.77      | 3.42E-08 | yes |
| 6030498E09Ri | 0.27   | 11.53 | 5.42      | 3.62E-08 | yes |
| Bcl6         | 9.26   | 2.17  | -2.09     | 3.87E-08 | yes |
| Pik3r6       | 0.00   | 4.01  | 1.79769e+ | 4.39E-08 | yes |
| Syne1        | 2.81   | 7.50  | 1.42      | 5.98E-08 | yes |
| Mpa2l        | 1.63   | 7.48  | 2.20      | 6.20E-08 | yes |
| Chst15       | 25.23  | 9.67  | -1.38     | 7.51E-08 | yes |
| Dnase2a      | 6.56   | 23.92 | 1.87      | 8.39E-08 | yes |
| 5830416P10Ri | 11.44  | 28.72 | 1.33      | 8.93E-08 | yes |
| Il12rb1      | 0.44   | 3.38  | 2.95      | 9.86E-08 | yes |
| Inpp5a       | 11.34  | 29.16 | 1.36      | 1.05E-07 | yes |
| Tmem132e     | 12.28  | 3.76  | -1.71     | 1.11E-07 | yes |
| Tbc1d20      | 23.61  | 58.37 | 1.31      | 1.25E-07 | yes |
| Cacna1h      | 0.54   | 2.61  | 2.27      | 1.85E-07 | yes |
| Myh10        | 2.03   | 6.26  | 1.63      | 2.13E-07 | yes |
| Rapgef11     | 16.78  | 5.93  | -1.50     | 2.13E-07 | yes |
| Mast1        | 0.59   | 3.15  | 2.41      | 2.21E-07 | yes |
| Nfkb2        | 11.44  | 27.16 | 1.25      | 2.21E-07 | yes |
| Pou2f2       | 16.52  | 6.38  | -1.37     | 2.23E-07 | yes |
| Scd1         | 16.18  | 5.71  | -1.50     | 2.28E-07 | yes |
| Enpep        | 10.45  | 29.61 | 1.50      | 2.38E-07 | yes |
| Pip5k1c      | 37.62  | 74.55 | 0.99      | 2.41E-07 | yes |
| Gpr133       | 0.09   | 1.48  | 3.98      | 3.23E-07 | yes |
| Arhgap19     | 44.45  | 22.03 | -1.01     | 3.69E-07 | yes |
| Gbp4         | 3.44   | 11.34 | 1.72      | 4.20E-07 | yes |
| Samhd1       | 23.48  | 9.80  | -1.26     | 4.57E-07 | yes |
| Vasn         | 26.97  | 60.85 | 1.17      | 4.83E-07 | yes |
| Il10ra       | 9.96   | 2.77  | -1.85     | 5.04E-07 | yes |
| Acox3        | 13.48  | 31.75 | 1.24      | 5.94E-07 | yes |
| Srpk3        | 10.39  | 2.09  | -2.31     | 6.70E-07 | yes |
| 2810417H13Ri | 177.50 | 82.33 | -1.11     | 6.94E-07 | yes |
| Diras2       | 4.22   | 0.90  | -2.22     | 7.43E-07 | yes |
| Rarres1      | 0.53   | 5.09  | 3.28      | 9.00E-07 | yes |
| Siglech      | 0.59   | 5.17  | 3.13      | 9.00E-07 | yes |
| Hdc          | 0.27   | 2.77  | 3.34      | 9.45E-07 | yes |
| Pam16        | 26.73  | 81.18 | 1.60      | 9.45E-07 | yes |

|              |       |       |            |          |     |
|--------------|-------|-------|------------|----------|-----|
| Tnfsf10      | 14.24 | 34.02 | 1.26       | 1.04E-06 | yes |
| Spns3        | 25.19 | 8.15  | -1.63      | 1.07E-06 | yes |
| Hdac11       | 5.05  | 16.08 | 1.67       | 1.13E-06 | yes |
| Tmem229b     | 68.77 | 34.05 | -1.01      | 1.13E-06 | yes |
| 4930579C15Ri | 0.28  | 6.30  | 4.48       | 1.14E-06 | yes |
| Phf15        | 7.84  | 18.61 | 1.25       | 1.17E-06 | yes |
| Lima1        | 0.89  | 4.39  | 2.31       | 1.19E-06 | yes |
| Polm         | 21.56 | 7.15  | -1.59      | 1.19E-06 | yes |
| Clcn5        | 3.78  | 12.46 | 1.72       | 1.26E-06 | yes |
| Atp8b2       | 12.88 | 29.12 | 1.18       | 1.40E-06 | yes |
| Gnpda1       | 11.35 | 30.10 | 1.41       | 1.41E-06 | yes |
| AA467197     | 1.44  | 13.77 | 3.26       | 1.41E-06 | yes |
| Gfi1b        | 6.39  | 0.36  | -4.16      | 1.43E-06 | yes |
| Nuak1        | 7.65  | 2.32  | -1.72      | 1.48E-06 | yes |
| Glcci1       | 44.97 | 20.00 | -1.17      | 1.49E-06 | yes |
| Nlrp1b       | 1.00  | 4.55  | 2.18       | 1.50E-06 | yes |
| Cd38         | 20.60 | 7.09  | -1.54      | 1.52E-06 | yes |
| Maf          | 3.81  | 12.72 | 1.74       | 1.52E-06 | yes |
| Galnt6       | 0.00  | 1.57  | 1.79769e+  | 1.73E-06 | yes |
| Prf1         | 0.75  | 4.63  | 2.62       | 1.81E-06 | yes |
| Cd5          | 1.50  | 7.05  | 2.23       | 1.82E-06 | yes |
| Shisa5       | 35.17 | 73.95 | 1.07       | 1.82E-06 | yes |
| Cd36         | 4.44  | 0.60  | -2.88      | 1.82E-06 | yes |
| Col5a3       | 4.11  | 0.96  | -2.10      | 1.83E-06 | yes |
| Rps27a       | 9.31  | 0.00  | -1.79769e- | 1.94E-06 | yes |
| Plxna2       | 0.35  | 1.59  | 2.17       | 1.94E-06 | yes |
| Dpp7         | 4.14  | 15.37 | 1.89       | 1.94E-06 | yes |
| Wapal        | 22.01 | 8.90  | -1.31      | 2.14E-06 | yes |
| Plin3        | 17.92 | 42.34 | 1.24       | 2.25E-06 | yes |
| Cyp11b2      | 0.12  | 5.59  | 5.49       | 2.30E-06 | yes |
| Neat1        | 38.52 | 82.74 | 1.10       | 2.30E-06 | yes |
| Grina        | 14.71 | 38.45 | 1.39       | 2.56E-06 | yes |
| Bzrap1       | 11.29 | 4.82  | -1.23      | 2.69E-06 | yes |
| Ptpn22       | 4.17  | 13.93 | 1.74       | 2.88E-06 | yes |
| A930001N09R  | 10.29 | 22.89 | 1.15       | 3.13E-06 | yes |
| Card6        | 6.19  | 1.79  | -1.79      | 3.19E-06 | yes |
| Mmp14        | 11.76 | 3.38  | -1.80      | 3.20E-06 | yes |
| Rasd1        | 0.98  | 5.72  | 2.55       | 3.35E-06 | yes |
| Fcrl6        | 7.42  | 23.16 | 1.64       | 3.62E-06 | yes |
| Tcf19        | 72.75 | 37.84 | -0.94      | 3.62E-06 | yes |
| Zfp385a      | 4.90  | 15.10 | 1.62       | 3.78E-06 | yes |
| Dtx3         | 20.62 | 47.51 | 1.20       | 3.78E-06 | yes |

|              |        |        |           |          |     |
|--------------|--------|--------|-----------|----------|-----|
| Gm8369       | 0.82   | 7.34   | 3.17      | 3.89E-06 | yes |
| Tbxa2r       | 13.62  | 35.04  | 1.36      | 4.53E-06 | yes |
| Ell3         | 1.94   | 8.83   | 2.19      | 4.61E-06 | yes |
| Figl1        | 63.53  | 33.47  | -0.92     | 4.73E-06 | yes |
| Gbp10        | 0.83   | 4.27   | 2.37      | 4.79E-06 | yes |
| P2rx3        | 11.86  | 4.10   | -1.53     | 4.84E-06 | yes |
| E330020D12Ri | 3.64   | 11.88  | 1.71      | 5.09E-06 | yes |
| Nhs1         | 0.45   | 2.18   | 2.28      | 5.30E-06 | yes |
| Casp4        | 5.12   | 18.75  | 1.87      | 5.61E-06 | yes |
| Dlg4         | 0.00   | 2.14   | 1.79769e+ | 5.75E-06 | yes |
| Pgcp         | 0.98   | 5.38   | 2.45      | 5.83E-06 | yes |
| Rgs8         | 2.08   | 6.86   | 1.72      | 5.83E-06 | yes |
| Acer3        | 2.01   | 7.36   | 1.87      | 6.24E-06 | yes |
| Dennd5b      | 14.83  | 6.67   | -1.15     | 6.43E-06 | yes |
| Rnasel       | 12.38  | 27.42  | 1.15      | 6.76E-06 | yes |
| Plcb2        | 16.16  | 34.11  | 1.08      | 6.76E-06 | yes |
| Lrrn4        | 1.44   | 5.93   | 2.04      | 7.77E-06 | yes |
| Art5         | 0.45   | 3.22   | 2.82      | 8.13E-06 | yes |
| Inpp4b       | 0.62   | 3.31   | 2.42      | 8.29E-06 | yes |
| Fcgr2b       | 19.86  | 6.47   | -1.62     | 8.62E-06 | yes |
| Ano6         | 30.85  | 14.76  | -1.06     | 9.18E-06 | yes |
| Armcx1       | 2.74   | 9.86   | 1.85      | 1.01E-05 | yes |
| Iigp1        | 1.17   | 5.97   | 2.35      | 1.09E-05 | yes |
| Tex264       | 6.10   | 18.96  | 1.63      | 1.15E-05 | yes |
| Vpreb1       | 245.69 | 531.39 | 1.11      | 1.18E-05 | yes |
| Gm8615       | 6.10   | 18.27  | 1.58      | 1.19E-05 | yes |
| Ccnd3        | 414.68 | 212.24 | -0.97     | 1.19E-05 | yes |
| Gldc         | 0.04   | 3.78   | 6.57      | 1.22E-05 | yes |
| Epb4.1l2     | 47.88  | 27.00  | -0.83     | 1.25E-05 | yes |
| Rxfp1        | 1.40   | 6.68   | 2.26      | 1.36E-05 | yes |
| Nt5dc3       | 6.33   | 14.68  | 1.21      | 1.38E-05 | yes |
| Epha2        | 19.96  | 8.70   | -1.20     | 1.41E-05 | yes |
| Sgms2        | 0.16   | 1.21   | 2.90      | 1.41E-05 | yes |
| Prnp         | 2.35   | 9.08   | 1.95      | 1.51E-05 | yes |
| Thbs2        | 0.06   | 0.90   | 3.89      | 1.52E-05 | yes |
| Kif19a       | 2.55   | 7.81   | 1.62      | 1.52E-05 | yes |
| Lcp2         | 2.90   | 9.09   | 1.65      | 1.63E-05 | yes |
| Igf2r        | 9.27   | 18.87  | 1.02      | 1.73E-05 | yes |
| Ng23         | 24.77  | 60.70  | 1.29      | 1.84E-05 | yes |
| Gaa          | 7.05   | 16.20  | 1.20      | 1.88E-05 | yes |
| Map3k8       | 1.21   | 5.58   | 2.20      | 1.90E-05 | yes |
| Tcn2         | 9.36   | 23.20  | 1.31      | 1.94E-05 | yes |



|              |        |        |       |          |     |
|--------------|--------|--------|-------|----------|-----|
| Orai2        | 12.78  | 27.58  | 1.11  | 1.94E-05 | yes |
| Cacna1e      | 6.93   | 14.56  | 1.07  | 1.98E-05 | yes |
| Ldlrad3      | 5.52   | 14.19  | 1.36  | 2.32E-05 | yes |
| Sgol2        | 29.94  | 16.09  | -0.90 | 2.32E-05 | yes |
| Nebi         | 0.29   | 2.28   | 3.00  | 2.34E-05 | yes |
| Ftl1         | 74.10  | 150.79 | 1.03  | 2.34E-05 | yes |
| Tubb2b       | 13.18  | 31.24  | 1.25  | 2.38E-05 | yes |
| Adap1        | 11.19  | 3.31   | -1.76 | 2.53E-05 | yes |
| Hebp1        | 4.45   | 16.95  | 1.93  | 2.88E-05 | yes |
| Klf4         | 4.75   | 1.17   | -2.02 | 2.92E-05 | yes |
| Gpr132       | 11.56  | 27.28  | 1.24  | 2.92E-05 | yes |
| Adamts14     | 0.27   | 1.43   | 2.39  | 2.93E-05 | yes |
| Phka1        | 8.51   | 3.46   | -1.30 | 2.94E-05 | yes |
| Ptprf        | 0.09   | 0.62   | 2.74  | 3.13E-05 | yes |
| Wdr81        | 11.42  | 22.87  | 1.00  | 3.13E-05 | yes |
| Bub1         | 33.60  | 18.11  | -0.89 | 3.13E-05 | yes |
| Rag1         | 80.62  | 38.23  | -1.08 | 3.13E-05 | yes |
| Clgn         | 1.06   | 4.90   | 2.21  | 3.22E-05 | yes |
| Ficn         | 18.70  | 38.80  | 1.05  | 3.56E-05 | yes |
| Hs1bp3       | 2.22   | 7.24   | 1.71  | 3.58E-05 | yes |
| Gimap3       | 5.55   | 16.50  | 1.57  | 3.66E-05 | yes |
| Sdc1         | 18.46  | 7.52   | -1.30 | 3.72E-05 | yes |
| Heyl         | 6.88   | 2.28   | -1.59 | 3.97E-05 | yes |
| Slamf9       | 5.18   | 0.86   | -2.58 | 4.31E-05 | yes |
| Tpp1         | 16.87  | 34.76  | 1.04  | 4.69E-05 | yes |
| Atp6v0c      | 117.05 | 228.31 | 0.96  | 5.26E-05 | yes |
| Edem3        | 24.24  | 12.23  | -0.99 | 5.60E-05 | yes |
| 1700021K19Ri | 16.58  | 7.80   | -1.09 | 5.76E-05 | yes |
| Inf2         | 6.97   | 15.29  | 1.13  | 5.90E-05 | yes |
| Tmem40       | 0.31   | 5.31   | 4.11  | 6.04E-05 | yes |
| Oasl2        | 1.07   | 4.40   | 2.04  | 6.21E-05 | yes |
| Whsc1        | 81.16  | 54.35  | -0.58 | 6.30E-05 | yes |
| Gpr176       | 0.59   | 2.67   | 2.18  | 6.39E-05 | yes |
| Nrgn         | 56.51  | 23.84  | -1.25 | 6.46E-05 | yes |
| Acsl1        | 14.51  | 29.75  | 1.04  | 6.68E-05 | yes |
| Eps8         | 13.16  | 5.58   | -1.24 | 6.94E-05 | yes |
| Nap1l1       | 263.01 | 160.08 | -0.72 | 7.10E-05 | yes |
| Slc43a2      | 14.67  | 7.57   | -0.95 | 7.10E-05 | yes |
| Eif2c4       | 3.00   | 7.48   | 1.32  | 7.12E-05 | yes |
| Trim16       | 13.31  | 27.70  | 1.06  | 7.19E-05 | yes |
| Tnfaip3      | 13.91  | 27.48  | 0.98  | 7.49E-05 | yes |
| Kbtbd11      | 3.03   | 7.41   | 1.29  | 7.57E-05 | yes |

|           |        |        |       |          |     |
|-----------|--------|--------|-------|----------|-----|
| Thop1     | 24.76  | 11.20  | -1.14 | 7.75E-05 | yes |
| Hvcn1     | 53.71  | 27.05  | -0.99 | 7.94E-05 | yes |
| Klhl32    | 2.49   | 0.38   | -2.71 | 8.53E-05 | yes |
| Kif14     | 16.28  | 8.28   | -0.98 | 8.90E-05 | yes |
| Ccl3      | 0.57   | 5.47   | 3.27  | 9.01E-05 | yes |
| Timeless  | 31.95  | 19.33  | -0.72 | 9.39E-05 | yes |
| Hdac5     | 37.24  | 21.17  | -0.81 | 9.40E-05 | yes |
| Gm5512    | 11.84  | 25.97  | 1.13  | 9.41E-05 | yes |
| Cybasc3   | 62.15  | 120.59 | 0.96  | 9.65E-05 | yes |
| Rmnd5b    | 18.57  | 38.58  | 1.05  | 1.02E-04 | yes |
| Sik1      | 18.89  | 8.94   | -1.08 | 1.07E-04 | yes |
| Amigo1    | 6.36   | 2.45   | -1.38 | 1.07E-04 | yes |
| Trim59    | 54.60  | 27.86  | -0.97 | 1.09E-04 | yes |
| Ehd4      | 24.86  | 11.90  | -1.06 | 1.12E-04 | yes |
| Blvrb     | 18.62  | 5.72   | -1.70 | 1.17E-04 | yes |
| Cyp2j6    | 0.63   | 3.11   | 2.30  | 1.17E-04 | yes |
| Lmo7      | 0.21   | 1.08   | 2.39  | 1.20E-04 | yes |
| Cmah      | 4.58   | 1.87   | -1.29 | 1.20E-04 | yes |
| Rtkn2     | 12.40  | 5.08   | -1.29 | 1.20E-04 | yes |
| Nusap1    | 64.07  | 35.98  | -0.83 | 1.23E-04 | yes |
| Srxn1     | 0.08   | 2.13   | 4.72  | 1.23E-04 | yes |
| Enpp5     | 0.44   | 3.78   | 3.10  | 1.23E-04 | yes |
| Ppm1e     | 19.34  | 9.74   | -0.99 | 1.27E-04 | yes |
| Fam101b   | 4.67   | 1.36   | -1.79 | 1.43E-04 | yes |
| Hexa      | 14.03  | 31.29  | 1.16  | 1.46E-04 | yes |
| Gm11346   | 0.95   | 5.52   | 2.54  | 1.50E-04 | yes |
| Gtse1     | 36.67  | 20.00  | -0.87 | 1.56E-04 | yes |
| Gpr128    | 0.90   | 3.74   | 2.06  | 1.67E-04 | yes |
| Nucks1    | 77.10  | 48.65  | -0.66 | 1.67E-04 | yes |
| Apol7b    | 0.77   | 3.22   | 2.07  | 1.69E-04 | yes |
| Clec2i    | 11.17  | 31.61  | 1.50  | 1.72E-04 | yes |
| Hmgb2     | 107.30 | 57.97  | -0.89 | 1.72E-04 | yes |
| Rrm2      | 143.46 | 77.77  | -0.88 | 1.76E-04 | yes |
| Zdhhc8    | 13.87  | 26.66  | 0.94  | 1.78E-04 | yes |
| Scap      | 28.64  | 47.96  | 0.74  | 1.80E-04 | yes |
| Nceh1     | 4.13   | 10.24  | 1.31  | 1.81E-04 | yes |
| Plxnb2    | 21.88  | 12.11  | -0.85 | 1.81E-04 | yes |
| Itga6     | 10.87  | 22.07  | 1.02  | 1.95E-04 | yes |
| Ivns1abp  | 152.06 | 104.34 | -0.54 | 1.95E-04 | yes |
| Syde2     | 0.45   | 1.94   | 2.09  | 2.00E-04 | yes |
| Serpinb6b | 1.69   | 6.87   | 2.02  | 2.00E-04 | yes |
| Utrn      | 11.60  | 22.02  | 0.93  | 2.02E-04 | yes |

|           |        |        |       |          |     |
|-----------|--------|--------|-------|----------|-----|
| Gpam      | 47.99  | 89.48  | 0.90  | 2.08E-04 | yes |
| Grb7      | 11.04  | 24.27  | 1.14  | 2.10E-04 | yes |
| Egfl6     | 7.88   | 2.34   | -1.75 | 2.10E-04 | yes |
| Batf      | 1.84   | 7.94   | 2.11  | 2.19E-04 | yes |
| Slc23a2   | 7.25   | 14.77  | 1.03  | 2.26E-04 | yes |
| Hsp90aa1  | 244.83 | 130.98 | -0.90 | 2.28E-04 | yes |
| Ahcy      | 128.01 | 69.60  | -0.88 | 2.29E-04 | yes |
| Cdca2     | 35.47  | 20.41  | -0.80 | 2.33E-04 | yes |
| E2f2      | 81.71  | 44.65  | -0.87 | 2.33E-04 | yes |
| Bard1     | 24.04  | 12.50  | -0.94 | 2.38E-04 | yes |
| H2-Ab1    | 41.98  | 18.73  | -1.16 | 2.44E-04 | yes |
| Cdk5r1    | 6.54   | 2.34   | -1.48 | 2.45E-04 | yes |
| Rasa13    | 26.76  | 50.08  | 0.90  | 2.49E-04 | yes |
| Irs2      | 7.16   | 15.35  | 1.10  | 2.60E-04 | yes |
| Flna      | 38.94  | 21.36  | -0.87 | 2.60E-04 | yes |
| Fmnl2     | 3.22   | 7.82   | 1.28  | 2.73E-04 | yes |
| Lgmn      | 16.72  | 35.46  | 1.08  | 2.81E-04 | yes |
| Cep55     | 45.19  | 26.14  | -0.79 | 2.81E-04 | yes |
| Acss1     | 40.17  | 73.55  | 0.87  | 3.05E-04 | yes |
| Zfp710    | 21.76  | 12.44  | -0.81 | 3.15E-04 | yes |
| Ehd2      | 31.94  | 16.43  | -0.96 | 3.21E-04 | yes |
| Epb4.1l4b | 27.45  | 51.15  | 0.90  | 3.29E-04 | yes |
| Tbc1d2    | 0.56   | 2.15   | 1.93  | 3.55E-04 | yes |
| Kpna2     | 62.36  | 32.96  | -0.92 | 3.59E-04 | yes |
| Wwc1      | 0.03   | 1.82   | 5.84  | 3.69E-04 | yes |
| Npc1      | 6.14   | 12.98  | 1.08  | 3.72E-04 | yes |
| Serpinb1a | 24.05  | 47.19  | 0.97  | 3.75E-04 | yes |
| Agtrap    | 9.43   | 18.99  | 1.01  | 3.75E-04 | yes |
| Aspm      | 36.09  | 19.99  | -0.85 | 3.75E-04 | yes |
| Wbscr27   | 1.90   | 6.01   | 1.66  | 3.75E-04 | yes |
| H2-K1     | 121.23 | 222.32 | 0.87  | 3.75E-04 | yes |
| Dlgap5    | 38.88  | 22.65  | -0.78 | 3.75E-04 | yes |
| Rnase4    | 7.26   | 19.10  | 1.40  | 3.79E-04 | yes |
| Npc2      | 22.81  | 42.70  | 0.90  | 3.81E-04 | yes |
| Ahcyl2    | 3.92   | 8.68   | 1.15  | 3.99E-04 | yes |
| Dok1      | 12.14  | 26.65  | 1.13  | 4.05E-04 | yes |
| Neurl1b   | 9.62   | 4.48   | -1.10 | 4.13E-04 | yes |
| Nsun7     | 0.18   | 1.59   | 3.15  | 4.23E-04 | yes |
| Kit       | 8.73   | 17.02  | 0.96  | 4.31E-04 | yes |
| Tle3      | 29.96  | 45.94  | 0.62  | 4.31E-04 | yes |
| Adamts7   | 1.43   | 4.12   | 1.52  | 4.40E-04 | yes |
| C79407    | 33.43  | 17.86  | -0.90 | 4.64E-04 | yes |

|               |       |       |           |          |     |
|---------------|-------|-------|-----------|----------|-----|
| Gabbr1        | 6.44  | 13.75 | 1.10      | 4.67E-04 | yes |
| Faim3         | 11.87 | 3.92  | -1.60     | 4.73E-04 | yes |
| Coro7         | 50.91 | 92.43 | 0.86      | 4.76E-04 | yes |
| Clcf1         | 11.96 | 3.26  | -1.88     | 4.76E-04 | yes |
| Adi1          | 20.91 | 42.90 | 1.04      | 4.77E-04 | yes |
| Nek2          | 49.32 | 26.83 | -0.88     | 4.90E-04 | yes |
| Prr11         | 34.32 | 18.34 | -0.90     | 4.91E-04 | yes |
| Nr1d1         | 4.06  | 10.61 | 1.38      | 4.95E-04 | yes |
| Lrrc32        | 0.13  | 0.91  | 2.81      | 4.95E-04 | yes |
| Kcnn4         | 19.82 | 37.16 | 0.91      | 5.00E-04 | yes |
| Emp3          | 36.64 | 14.84 | -1.30     | 5.03E-04 | yes |
| Pnpla7        | 6.12  | 12.73 | 1.06      | 5.03E-04 | yes |
| Spata13       | 17.28 | 31.72 | 0.88      | 5.05E-04 | yes |
| C030039L03Ri  | 0.66  | 0.00  | -1.79769e | 5.14E-04 | yes |
| Cnot8         | 42.22 | 77.60 | 0.88      | 5.20E-04 | yes |
| Atp13a2       | 38.05 | 62.14 | 0.71      | 5.20E-04 | yes |
| Fbxw8         | 10.40 | 4.74  | -1.13     | 5.29E-04 | yes |
| Polq          | 14.30 | 8.18  | -0.81     | 5.33E-04 | yes |
| Slfn5         | 1.83  | 4.91  | 1.43      | 5.43E-04 | yes |
| Mbd4          | 26.98 | 14.03 | -0.94     | 5.49E-04 | yes |
| Pld4          | 12.08 | 4.36  | -1.47     | 5.57E-04 | yes |
| Cables1       | 0.85  | 0.00  | -1.79769e | 5.65E-04 | yes |
| Mcart6        | 5.97  | 14.07 | 1.24      | 5.83E-04 | yes |
| Kif24         | 11.08 | 5.36  | -1.05     | 5.84E-04 | yes |
| Rad54l        | 30.19 | 16.44 | -0.88     | 6.15E-04 | yes |
| Cd96          | 0.43  | 2.38  | 2.46      | 6.23E-04 | yes |
| Tecpr1        | 11.98 | 22.79 | 0.93      | 6.32E-04 | yes |
| Tubb2a        | 9.36  | 21.87 | 1.22      | 6.44E-04 | yes |
| 1700029I01Rik | 4.59  | 10.52 | 1.20      | 6.73E-04 | yes |
| Celsr2        | 3.70  | 1.66  | -1.16     | 6.82E-04 | yes |
| Traf1         | 0.33  | 1.62  | 2.31      | 6.83E-04 | yes |
| Tert          | 3.69  | 9.04  | 1.29      | 7.00E-04 | yes |
| Azin1         | 57.02 | 35.78 | -0.67     | 7.50E-04 | yes |
| Cdkn2d        | 98.02 | 59.99 | -0.71     | 7.68E-04 | yes |
| E2f8          | 48.21 | 27.13 | -0.83     | 8.04E-04 | yes |
| Gimap8        | 6.23  | 13.62 | 1.13      | 8.20E-04 | yes |
| Lrrc10b       | 2.55  | 8.59  | 1.75      | 8.37E-04 | yes |
| Kcng1         | 2.14  | 6.73  | 1.66      | 8.37E-04 | yes |
| Myo1f         | 2.51  | 6.47  | 1.37      | 8.55E-04 | yes |
| 8430419L09Ri  | 12.50 | 23.71 | 0.92      | 8.72E-04 | yes |
| Ikbke         | 4.79  | 11.00 | 1.20      | 8.77E-04 | yes |
| Fhod3         | 0.65  | 0.12  | -2.41     | 8.80E-04 | yes |

|              |        |        |       |          |     |
|--------------|--------|--------|-------|----------|-----|
| Tubb2c       | 206.93 | 118.42 | -0.81 | 9.36E-04 | yes |
| Camsap1l1    | 7.20   | 3.44   | -1.07 | 9.61E-04 | yes |
| C330027C09Ri | 45.63  | 25.64  | -0.83 | 9.68E-04 | yes |
| Mmp9         | 0.23   | 1.29   | 2.48  | 9.93E-04 | yes |
| Pask         | 16.47  | 8.67   | -0.93 | 9.99E-04 | yes |
| Irf4         | 73.71  | 41.84  | -0.82 | 1.02E-03 | yes |
| Tnfrsf13c    | 29.88  | 55.04  | 0.88  | 1.02E-03 | yes |
| Esco2        | 41.60  | 22.61  | -0.88 | 1.05E-03 | yes |
| Gas2l3       | 21.73  | 13.07  | -0.73 | 1.05E-03 | yes |
| Zfp703       | 8.81   | 3.68   | -1.26 | 1.08E-03 | yes |
| H2-Q6        | 16.69  | 37.17  | 1.16  | 1.09E-03 | yes |
| Fam189a1     | 1.32   | 0.02   | -5.80 | 1.12E-03 | yes |
| Polh         | 34.82  | 18.50  | -0.91 | 1.12E-03 | yes |
| Nasp         | 67.00  | 40.53  | -0.72 | 1.15E-03 | yes |
| E2f7         | 20.57  | 11.33  | -0.86 | 1.18E-03 | yes |
| Gk5          | 3.42   | 1.01   | -1.77 | 1.22E-03 | yes |
| Tmprss3      | 31.62  | 17.56  | -0.85 | 1.23E-03 | yes |
| Kif18b       | 39.66  | 22.33  | -0.83 | 1.25E-03 | yes |
| Carhsp1      | 38.52  | 21.14  | -0.87 | 1.25E-03 | yes |
| Mef2c        | 36.40  | 22.41  | -0.70 | 1.27E-03 | yes |
| Traf5        | 10.23  | 3.93   | -1.38 | 1.29E-03 | yes |
| Mybl2        | 35.32  | 19.93  | -0.83 | 1.31E-03 | yes |
| Tfrc         | 61.36  | 35.65  | -0.78 | 1.31E-03 | yes |
| Kif3a        | 4.73   | 9.92   | 1.07  | 1.32E-03 | yes |
| Ccnb1        | 95.12  | 54.84  | -0.79 | 1.32E-03 | yes |
| Rtn4ip1      | 19.79  | 9.65   | -1.04 | 1.32E-03 | yes |
| Plxna3       | 5.37   | 2.38   | -1.17 | 1.34E-03 | yes |
| Ccna2        | 119.61 | 69.51  | -0.78 | 1.37E-03 | yes |
| Pif1         | 28.06  | 15.40  | -0.87 | 1.39E-03 | yes |
| Cenpm        | 30.79  | 14.80  | -1.06 | 1.41E-03 | yes |
| Inpp5f       | 9.84   | 4.57   | -1.11 | 1.41E-03 | yes |
| Sipa1l2      | 5.18   | 2.26   | -1.19 | 1.41E-03 | yes |
| 2900006K08Ri | 1.34   | 4.42   | 1.72  | 1.45E-03 | yes |
| Sertad4      | 5.03   | 1.73   | -1.54 | 1.47E-03 | yes |
| Lphn2        | 5.20   | 10.56  | 1.02  | 1.48E-03 | yes |
| Plk1         | 67.14  | 38.26  | -0.81 | 1.48E-03 | yes |
| Entpd5       | 23.71  | 38.04  | 0.68  | 1.49E-03 | yes |
| Afap1        | 3.41   | 7.15   | 1.07  | 1.51E-03 | yes |
| Lphn1        | 9.35   | 4.96   | -0.92 | 1.57E-03 | yes |
| Padi4        | 1.98   | 5.67   | 1.52  | 1.57E-03 | yes |
| Birc5        | 87.06  | 50.57  | -0.78 | 1.57E-03 | yes |
| Pdk1         | 15.00  | 26.99  | 0.85  | 1.60E-03 | yes |

|               |        |       |           |          |     |
|---------------|--------|-------|-----------|----------|-----|
| Troap         | 23.48  | 12.19 | -0.95     | 1.60E-03 | yes |
| Slc12a7       | 15.70  | 28.31 | 0.85      | 1.61E-03 | yes |
| Mast2         | 26.74  | 15.67 | -0.77     | 1.61E-03 | yes |
| Eri2          | 15.47  | 7.45  | -1.05     | 1.62E-03 | yes |
| Magi2         | 0.00   | 0.40  | 1.79769e+ | 1.62E-03 | yes |
| Megf6         | 0.49   | 0.03  | -4.09     | 1.62E-03 | yes |
| Syt14         | 2.31   | 6.23  | 1.43      | 1.62E-03 | yes |
| Ccl4          | 0.40   | 4.87  | 3.59      | 1.63E-03 | yes |
| Esp1          | 33.96  | 19.75 | -0.78     | 1.64E-03 | yes |
| Ffar1         | 3.86   | 0.76  | -2.34     | 1.66E-03 | yes |
| Gm13251       | 4.72   | 10.84 | 1.20      | 1.72E-03 | yes |
| Tmtc1         | 0.60   | 0.14  | -2.08     | 1.72E-03 | yes |
| Spc25         | 57.17  | 31.44 | -0.86     | 1.75E-03 | yes |
| Itpkb         | 24.53  | 42.60 | 0.80      | 1.76E-03 | yes |
| Arhgef5       | 2.20   | 5.28  | 1.26      | 1.78E-03 | yes |
| Cit           | 17.46  | 9.94  | -0.81     | 1.78E-03 | yes |
| Aldh11l1      | 0.61   | 2.30  | 1.91      | 1.80E-03 | yes |
| Reep2         | 5.83   | 1.89  | -1.63     | 1.80E-03 | yes |
| H2afx         | 155.26 | 90.71 | -0.78     | 1.84E-03 | yes |
| BC016495      | 4.53   | 12.52 | 1.47      | 1.86E-03 | yes |
| Anxa5         | 4.82   | 12.46 | 1.37      | 1.86E-03 | yes |
| Anln          | 27.12  | 15.53 | -0.80     | 1.86E-03 | yes |
| Ppap2b        | 2.27   | 0.61  | -1.90     | 1.86E-03 | yes |
| 2810442121Rik | 3.95   | 1.25  | -1.66     | 1.89E-03 | yes |
| Frmd6         | 13.00  | 24.25 | 0.90      | 1.90E-03 | yes |
| Tef           | 10.29  | 18.48 | 0.84      | 1.90E-03 | yes |
| Socs3         | 1.20   | 3.88  | 1.70      | 1.91E-03 | yes |
| Mpo           | 12.93  | 5.67  | -1.19     | 1.91E-03 | yes |
| Far1          | 52.20  | 30.78 | -0.76     | 1.92E-03 | yes |
| Cldn4         | 1.11   | 4.25  | 1.94      | 1.94E-03 | yes |
| Gm5069        | 0.81   | 2.69  | 1.74      | 1.94E-03 | yes |
| F5            | 0.65   | 0.15  | -2.09     | 1.94E-03 | yes |
| Prkcq         | 2.15   | 5.73  | 1.42      | 1.98E-03 | yes |
| Rnf144a       | 18.16  | 10.33 | -0.81     | 2.03E-03 | yes |
| Mthfd2        | 31.88  | 16.48 | -0.95     | 2.03E-03 | yes |
| Galnt10       | 6.72   | 2.97  | -1.18     | 2.06E-03 | yes |
| Lynx1         | 6.44   | 12.94 | 1.01      | 2.07E-03 | yes |
| Rhobtb2       | 11.56  | 20.62 | 0.83      | 2.10E-03 | yes |
| Ppt1          | 40.08  | 69.36 | 0.79      | 2.10E-03 | yes |
| Phf19         | 21.42  | 11.63 | -0.88     | 2.16E-03 | yes |
| Mastl         | 11.08  | 5.35  | -1.05     | 2.16E-03 | yes |
| B3gnt8        | 27.03  | 13.93 | -0.96     | 2.20E-03 | yes |

|              |        |       |            |          |     |
|--------------|--------|-------|------------|----------|-----|
| Ggnbp1       | 2.25   | 7.19  | 1.67       | 2.21E-03 | yes |
| Mtap2        | 0.57   | 0.00  | -1.79769e- | 2.25E-03 | yes |
| Ncoa4        | 44.97  | 69.75 | 0.63       | 2.25E-03 | yes |
| Hmmr         | 35.90  | 20.74 | -0.79      | 2.31E-03 | yes |
| Fuca2        | 9.17   | 17.62 | 0.94       | 2.33E-03 | yes |
| Syt11        | 4.19   | 10.52 | 1.33       | 2.33E-03 | yes |
| Kif15        | 37.73  | 22.13 | -0.77      | 2.34E-03 | yes |
| N4bp2l1      | 6.71   | 15.80 | 1.24       | 2.34E-03 | yes |
| Ctns         | 5.27   | 11.75 | 1.16       | 2.46E-03 | yes |
| Erg          | 33.94  | 61.05 | 0.85       | 2.46E-03 | yes |
| Casc5        | 39.77  | 23.55 | -0.76      | 2.48E-03 | yes |
| Adck3        | 2.53   | 6.17  | 1.28       | 2.49E-03 | yes |
| Krba1        | 3.85   | 7.53  | 0.97       | 2.49E-03 | yes |
| Ckap2l       | 46.78  | 27.23 | -0.78      | 2.50E-03 | yes |
| Spns2        | 1.91   | 0.53  | -1.86      | 2.50E-03 | yes |
| Cenpf        | 38.30  | 22.67 | -0.76      | 2.53E-03 | yes |
| Zap70        | 8.19   | 2.99  | -1.45      | 2.53E-03 | yes |
| Rap1gds1     | 22.43  | 12.64 | -0.83      | 2.54E-03 | yes |
| Trpm5        | 0.33   | 0.00  | -1.79769e- | 2.56E-03 | yes |
| H2-Oa        | 6.23   | 16.87 | 1.44       | 2.57E-03 | yes |
| Idua         | 6.85   | 13.91 | 1.02       | 2.58E-03 | yes |
| 4930420K17Ri | 32.03  | 14.00 | -1.19      | 2.58E-03 | yes |
| Rftn2        | 5.94   | 12.42 | 1.06       | 2.58E-03 | yes |
| Brca1        | 21.34  | 12.42 | -0.78      | 2.58E-03 | yes |
| Fat4         | 0.02   | 0.17  | 3.17       | 2.59E-03 | yes |
| Ralb         | 3.01   | 7.93  | 1.39       | 2.64E-03 | yes |
| Cacna1b      | 1.17   | 2.92  | 1.32       | 2.71E-03 | yes |
| Mansc1       | 0.25   | 1.42  | 2.50       | 2.72E-03 | yes |
| Ypel2        | 5.23   | 10.54 | 1.01       | 2.75E-03 | yes |
| Gstt2        | 21.67  | 41.48 | 0.94       | 2.79E-03 | yes |
| Gstm1        | 9.68   | 22.08 | 1.19       | 2.81E-03 | yes |
| Cbx5         | 79.25  | 50.85 | -0.64      | 2.82E-03 | yes |
| Hmgb1        | 58.64  | 33.73 | -0.80      | 2.82E-03 | yes |
| Igsf9        | 3.21   | 1.17  | -1.46      | 2.84E-03 | yes |
| Pde7a        | 30.81  | 18.36 | -0.75      | 2.87E-03 | yes |
| Aldh3b2      | 0.30   | 1.59  | 2.42       | 2.92E-03 | yes |
| Kntc1        | 19.37  | 11.26 | -0.78      | 2.94E-03 | yes |
| Mdm1         | 23.63  | 13.69 | -0.79      | 2.99E-03 | yes |
| Il18rap      | 0.66   | 2.48  | 1.92       | 2.99E-03 | yes |
| Mobkl2c      | 4.17   | 9.59  | 1.20       | 2.99E-03 | yes |
| Top2a        | 153.37 | 88.84 | -0.79      | 2.99E-03 | yes |
| A630055G03R  | 15.45  | 7.92  | -0.96      | 2.99E-03 | yes |

|              |        |        |       |          |     |
|--------------|--------|--------|-------|----------|-----|
| Auts2        | 1.43   | 3.47   | 1.28  | 3.05E-03 | yes |
| Nuf2         | 40.18  | 22.62  | -0.83 | 3.07E-03 | yes |
| Sema7a       | 0.94   | 3.01   | 1.68  | 3.16E-03 | yes |
| Psd          | 1.16   | 3.27   | 1.50  | 3.16E-03 | yes |
| Ublcp1       | 18.69  | 8.71   | -1.10 | 3.16E-03 | yes |
| Pafah2       | 1.20   | 3.56   | 1.57  | 3.17E-03 | yes |
| Gfi1         | 17.07  | 30.26  | 0.83  | 3.25E-03 | yes |
| Zeb2         | 29.83  | 17.90  | -0.74 | 3.25E-03 | yes |
| Pyhin1       | 89.96  | 53.75  | -0.74 | 3.27E-03 | yes |
| Oxct1        | 38.28  | 22.32  | -0.78 | 3.28E-03 | yes |
| 5730590G19Ri | 20.52  | 12.12  | -0.76 | 3.28E-03 | yes |
| Hmgn2        | 88.21  | 50.57  | -0.80 | 3.34E-03 | yes |
| Kifc5b       | 35.30  | 20.04  | -0.82 | 3.34E-03 | yes |
| Tubb3        | 0.19   | 1.45   | 2.90  | 3.36E-03 | yes |
| Nynrin       | 1.74   | 3.98   | 1.20  | 3.41E-03 | yes |
| Ube2s        | 159.95 | 95.14  | -0.75 | 3.44E-03 | yes |
| Cdc7         | 31.56  | 17.71  | -0.83 | 3.46E-03 | yes |
| Ppp1cc       | 298.33 | 175.22 | -0.77 | 3.48E-03 | yes |
| Oaf          | 5.81   | 2.15   | -1.44 | 3.50E-03 | yes |
| Adora2a      | 4.51   | 10.65  | 1.24  | 3.54E-03 | yes |
| Pitpnc1      | 11.40  | 6.16   | -0.89 | 3.56E-03 | yes |
| Hspa1b       | 1.43   | 0.36   | -2.00 | 3.62E-03 | yes |
| Btrc         | 23.01  | 14.63  | -0.65 | 3.72E-03 | yes |
| Angptl4      | 2.17   | 0.52   | -2.05 | 3.81E-03 | yes |
| Rgs2         | 23.72  | 12.77  | -0.89 | 3.82E-03 | yes |
| Arntl        | 37.80  | 21.87  | -0.79 | 3.85E-03 | yes |
| Wdr90        | 15.33  | 8.74   | -0.81 | 3.85E-03 | yes |
| Ccne2        | 30.97  | 17.29  | -0.84 | 3.85E-03 | yes |
| Wfs1         | 2.48   | 0.83   | -1.58 | 3.88E-03 | yes |
| Fanca        | 15.20  | 8.28   | -0.88 | 3.93E-03 | yes |
| Abcg3        | 3.21   | 7.82   | 1.29  | 3.96E-03 | yes |
| Ms4a6b       | 2.78   | 8.10   | 1.54  | 3.96E-03 | yes |
| Thy1         | 3.75   | 9.73   | 1.37  | 3.99E-03 | yes |
| Csrp2        | 41.76  | 19.79  | -1.08 | 3.99E-03 | yes |
| Arhgap11a    | 50.62  | 30.65  | -0.72 | 4.02E-03 | yes |
| AI480653     | 12.87  | 23.25  | 0.85  | 4.06E-03 | yes |
| 1810011H11Ri | 0.12   | 2.23   | 4.23  | 4.07E-03 | yes |
| Tuba1b       | 85.70  | 50.66  | -0.76 | 4.07E-03 | yes |
| Tpm4         | 89.34  | 53.72  | -0.73 | 4.09E-03 | yes |
| Arhgap23     | 4.50   | 1.99   | -1.18 | 4.09E-03 | yes |
| Racgap1      | 59.05  | 35.52  | -0.73 | 4.09E-03 | yes |
| Pcp4l1       | 13.29  | 5.29   | -1.33 | 4.18E-03 | yes |



|              |       |       |            |          |     |
|--------------|-------|-------|------------|----------|-----|
| Spnb1        | 0.27  | 0.06  | -2.19      | 4.24E-03 | yes |
| Pik3r5       | 5.80  | 11.10 | 0.94       | 4.27E-03 | yes |
| D630039A03R  | 0.10  | 0.92  | 3.15       | 4.29E-03 | yes |
| Rapgef5      | 7.12  | 13.61 | 0.93       | 4.32E-03 | yes |
| Rbl1         | 47.79 | 30.03 | -0.67      | 4.32E-03 | yes |
| Igj          | 1.71  | 0.32  | -2.41      | 4.33E-03 | yes |
| Cdc45        | 36.96 | 21.36 | -0.79      | 4.37E-03 | yes |
| Shcbp1       | 39.51 | 21.96 | -0.85      | 4.39E-03 | yes |
| Plip         | 1.75  | 0.39  | -2.18      | 4.39E-03 | yes |
| Bmf          | 13.32 | 23.30 | 0.81       | 4.55E-03 | yes |
| Myef2        | 50.98 | 33.46 | -0.61      | 4.55E-03 | yes |
| Kif22        | 59.57 | 35.35 | -0.75      | 4.55E-03 | yes |
| Hsph1        | 34.95 | 20.69 | -0.76      | 4.57E-03 | yes |
| Crip2        | 4.86  | 1.52  | -1.68      | 4.58E-03 | yes |
| Fbxl12       | 52.28 | 81.34 | 0.64       | 4.61E-03 | yes |
| Clspn        | 33.96 | 20.51 | -0.73      | 4.64E-03 | yes |
| Shank2       | 0.21  | 0.00  | -1.79769e- | 4.65E-03 | yes |
| Cenpe        | 33.58 | 20.47 | -0.71      | 4.65E-03 | yes |
| Ccnf         | 49.97 | 30.06 | -0.73      | 4.65E-03 | yes |
| Eps8l1       | 1.73  | 4.79  | 1.47       | 4.66E-03 | yes |
| Arap1        | 20.73 | 33.52 | 0.69       | 4.66E-03 | yes |
| Fancd2       | 18.90 | 10.80 | -0.81      | 4.69E-03 | yes |
| Ii18         | 5.75  | 1.55  | -1.89      | 4.69E-03 | yes |
| Cacna2d4     | 0.79  | 2.22  | 1.49       | 4.71E-03 | yes |
| Hist3h2ba    | 3.91  | 0.32  | -3.63      | 4.71E-03 | yes |
| Rapgef4      | 0.26  | 1.20  | 2.22       | 4.74E-03 | yes |
| Dtl          | 42.14 | 25.42 | -0.73      | 4.74E-03 | yes |
| Bst1         | 26.56 | 46.61 | 0.81       | 4.76E-03 | yes |
| Stag3        | 4.37  | 1.76  | -1.31      | 4.77E-03 | yes |
| Hcst         | 0.94  | 6.62  | 2.82       | 4.80E-03 | yes |
| Kifc1        | 48.15 | 28.49 | -0.76      | 4.88E-03 | yes |
| 6330503K22Ri | 20.71 | 12.06 | -0.78      | 5.10E-03 | yes |
| Hells        | 50.10 | 30.01 | -0.74      | 5.13E-03 | yes |
| Brca2        | 12.80 | 8.03  | -0.67      | 5.16E-03 | yes |
| Tjp3         | 6.38  | 12.57 | 0.98       | 5.16E-03 | yes |
| Serinc5      | 51.20 | 31.24 | -0.71      | 5.18E-03 | yes |
| 1600016N20Ri | 0.85  | 2.83  | 1.73       | 5.20E-03 | yes |
| 1500010J02Ri | 26.79 | 17.14 | -0.64      | 5.20E-03 | yes |
| F730016J06Ri | 0.00  | 0.48  | 1.79769e+  | 5.26E-03 | yes |
| Gfod1        | 17.82 | 10.55 | -0.76      | 5.28E-03 | yes |
| Itih5        | 5.62  | 2.82  | -1.00      | 5.31E-03 | yes |
| Sec22c       | 4.42  | 8.39  | 0.93       | 5.41E-03 | yes |

|               |        |        |       |          |     |
|---------------|--------|--------|-------|----------|-----|
| Kif2c         | 30.83  | 17.81  | -0.79 | 5.45E-03 | yes |
| H1fx          | 13.06  | 5.09   | -1.36 | 5.47E-03 | yes |
| Dusp5         | 7.65   | 17.96  | 1.23  | 5.47E-03 | yes |
| Pola1         | 33.02  | 20.03  | -0.72 | 5.49E-03 | yes |
| Pear1         | 8.10   | 13.82  | 0.77  | 5.49E-03 | yes |
| Loxhd1        | 0.54   | 0.11   | -2.29 | 5.58E-03 | yes |
| Kcnmb4        | 3.48   | 0.87   | -2.00 | 5.70E-03 | yes |
| Osbpl1a       | 3.12   | 7.19   | 1.20  | 5.76E-03 | yes |
| Pisd-ps2      | 16.14  | 30.87  | 0.94  | 5.76E-03 | yes |
| Gimap1        | 31.45  | 54.77  | 0.80  | 5.76E-03 | yes |
| Ncaph         | 50.04  | 30.10  | -0.73 | 5.79E-03 | yes |
| Rangrf        | 7.93   | 2.47   | -1.69 | 5.84E-03 | yes |
| Gsg1          | 0.29   | 1.91   | 2.72  | 5.91E-03 | yes |
| Ston1         | 0.99   | 3.00   | 1.59  | 5.91E-03 | yes |
| Kif11         | 79.07  | 48.66  | -0.70 | 5.91E-03 | yes |
| Zfp518b       | 4.22   | 1.95   | -1.11 | 5.98E-03 | yes |
| Sgol1         | 24.72  | 14.17  | -0.80 | 5.98E-03 | yes |
| Arid3a        | 17.23  | 9.91   | -0.80 | 6.04E-03 | yes |
| Srsf7         | 134.99 | 95.93  | -0.49 | 6.10E-03 | yes |
| A430093F15Ri  | 0.33   | 1.51   | 2.18  | 6.18E-03 | yes |
| Cln3          | 5.66   | 11.76  | 1.05  | 6.29E-03 | yes |
| A130040M12F   | 1.86   | 4.74   | 1.35  | 6.32E-03 | yes |
| Ncapg2        | 43.79  | 27.05  | -0.69 | 6.32E-03 | yes |
| Nrm           | 53.46  | 30.37  | -0.82 | 6.33E-03 | yes |
| Entpd1        | 9.19   | 16.92  | 0.88  | 6.33E-03 | yes |
| Dnajc6        | 1.51   | 3.62   | 1.26  | 6.38E-03 | yes |
| Tmod3         | 31.75  | 52.27  | 0.72  | 6.39E-03 | yes |
| Adam11        | 0.05   | 0.45   | 3.09  | 6.41E-03 | yes |
| 6430571L13Ril | 0.53   | 1.97   | 1.88  | 6.46E-03 | yes |
| Srsf3         | 199.47 | 140.52 | -0.51 | 6.48E-03 | yes |
| Tulp4         | 7.04   | 4.06   | -0.79 | 6.54E-03 | yes |
| Tec           | 15.90  | 26.98  | 0.76  | 6.58E-03 | yes |
| Alpk3         | 0.26   | 0.86   | 1.72  | 6.59E-03 | yes |
| Gbp8          | 0.39   | 1.64   | 2.08  | 6.89E-03 | yes |
| BC060267      | 0.35   | 1.42   | 2.01  | 6.89E-03 | yes |
| Phyhip        | 0.15   | 0.93   | 2.68  | 7.11E-03 | yes |
| Arsa          | 4.52   | 9.25   | 1.03  | 7.14E-03 | yes |
| Pgm2          | 6.86   | 14.00  | 1.03  | 7.19E-03 | yes |
| Lrp6          | 11.63  | 19.06  | 0.71  | 7.23E-03 | yes |
| Me3           | 0.10   | 0.70   | 2.85  | 7.28E-03 | yes |
| Lyn           | 53.95  | 35.37  | -0.61 | 7.28E-03 | yes |
| Adamtsl2      | 0.21   | 0.86   | 2.06  | 7.36E-03 | yes |

|              |        |        |           |          |     |
|--------------|--------|--------|-----------|----------|-----|
| Mgat4b       | 8.90   | 17.02  | 0.94      | 7.36E-03 | yes |
| Il6st        | 6.07   | 11.05  | 0.86      | 7.36E-03 | yes |
| AI504432     | 30.99  | 18.73  | -0.73     | 7.39E-03 | yes |
| Rragb        | 3.14   | 7.71   | 1.29      | 7.40E-03 | yes |
| Igll1        | 189.97 | 314.12 | 0.73      | 7.41E-03 | yes |
| Gpr18        | 9.81   | 3.75   | -1.39     | 7.41E-03 | yes |
| Kif4         | 29.50  | 18.02  | -0.71     | 7.46E-03 | yes |
| Tbc1d10c     | 53.19  | 88.27  | 0.73      | 7.49E-03 | yes |
| Gm4759       | 31.89  | 53.01  | 0.73      | 7.65E-03 | yes |
| 5031414D18Ri | 8.89   | 3.96   | -1.17     | 7.68E-03 | yes |
| Ccne1        | 23.51  | 12.38  | -0.93     | 7.72E-03 | yes |
| Pfn2         | 6.94   | 2.58   | -1.43     | 7.85E-03 | yes |
| Oasl1        | 6.42   | 13.38  | 1.06      | 7.94E-03 | yes |
| Sfpi1        | 29.57  | 15.22  | -0.96     | 7.94E-03 | yes |
| Dut          | 48.65  | 30.74  | -0.66     | 8.06E-03 | yes |
| Il5ra        | 1.81   | 0.55   | -1.73     | 8.08E-03 | yes |
| Cenpl        | 30.01  | 17.11  | -0.81     | 8.09E-03 | yes |
| Serpinb1c    | 0.69   | 2.53   | 1.87      | 8.19E-03 | yes |
| Steap4       | 14.65  | 26.01  | 0.83      | 8.19E-03 | yes |
| Ap1m2        | 0.00   | 1.11   | 1.79769e+ | 8.23E-03 | yes |
| Plk2         | 4.28   | 9.47   | 1.15      | 8.28E-03 | yes |
| H2-Gs10      | 62.07  | 100.61 | 0.70      | 8.28E-03 | yes |
| Rasgrp4      | 1.62   | 4.61   | 1.51      | 8.36E-03 | yes |
| Wdhd1        | 34.74  | 21.29  | -0.71     | 8.43E-03 | yes |
| Naga         | 6.24   | 13.34  | 1.10      | 8.60E-03 | yes |
| Sfxn3        | 8.56   | 15.66  | 0.87      | 8.89E-03 | yes |
| H2afz        | 439.45 | 274.58 | -0.68     | 8.99E-03 | yes |
| Sdk2         | 0.02   | 0.35   | 4.08      | 9.02E-03 | yes |
| Hnrnpa2b1    | 336.24 | 238.33 | -0.50     | 9.03E-03 | yes |
| Spag5        | 42.12  | 26.15  | -0.69     | 9.03E-03 | yes |
| Gbp2         | 6.03   | 12.72  | 1.08      | 9.27E-03 | yes |
| P2rx4        | 4.39   | 10.02  | 1.19      | 9.35E-03 | yes |
| Atad5        | 23.71  | 14.73  | -0.69     | 9.35E-03 | yes |
| Stk10        | 30.40  | 18.80  | -0.69     | 9.35E-03 | yes |
| Uba7         | 21.01  | 34.99  | 0.74      | 9.39E-03 | yes |
| Fam83d       | 14.51  | 7.16   | -1.02     | 9.39E-03 | yes |
| Rai14        | 3.08   | 6.33   | 1.04      | 9.50E-03 | yes |
| Zfp41        | 19.99  | 11.86  | -0.75     | 9.52E-03 | yes |
| Cdca5        | 42.97  | 25.22  | -0.77     | 9.52E-03 | yes |
| Tbcel        | 11.07  | 18.81  | 0.77      | 9.54E-03 | yes |
| Cenpi        | 18.23  | 9.90   | -0.88     | 9.54E-03 | yes |
| Prlr         | 0.72   | 1.79   | 1.32      | 9.56E-03 | yes |

|              |        |        |           |          |     |
|--------------|--------|--------|-----------|----------|-----|
| Gad1         | 0.34   | 0.00   | -1.79769e | 9.59E-03 | yes |
| Dpt          | 0.96   | 3.23   | 1.74      | 9.61E-03 | yes |
| Bank1        | 3.76   | 1.38   | -1.45     | 9.61E-03 | yes |
| Xbp1         | 29.28  | 49.33  | 0.75      | 9.61E-03 | yes |
| Gpatch2      | 14.53  | 8.25   | -0.82     | 9.61E-03 | yes |
| Stmn1        | 827.24 | 497.15 | -0.73     | 9.63E-03 | yes |
| Phf21b       | 0.45   | 0.00   | -1.79769e | 9.64E-03 | yes |
| Tnik         | 0.65   | 1.71   | 1.39      | 9.72E-03 | yes |
| Bcl2l2       | 5.79   | 11.21  | 0.95      | 9.82E-03 | yes |
| Bri3         | 22.43  | 42.44  | 0.92      | 9.82E-03 | yes |
| Trfr2        | 1.19   | 3.44   | 1.53      | 9.83E-03 | yes |
| Stil         | 25.26  | 15.50  | -0.71     | 9.84E-03 | yes |
| Mthfd1l      | 31.91  | 20.35  | -0.65     | 9.87E-03 | yes |
| Ccr5         | 0.26   | 1.20   | 2.19      | 9.96E-03 | yes |
| Lxn          | 29.85  | 52.53  | 0.82      | 9.96E-03 | yes |
| Cyth1        | 48.79  | 72.27  | 0.57      | 9.96E-03 | yes |
| Fam111a      | 65.43  | 41.04  | -0.67     | 9.96E-03 | yes |
| Fech         | 7.68   | 14.74  | 0.94      | 9.98E-03 | yes |
| Lgals3bp     | 11.04  | 20.56  | 0.90      | 9.98E-03 | yes |
| Prc1         | 54.53  | 33.99  | -0.68     | 1.00E-02 | yes |
| Dntt         | 139.89 | 221.13 | 0.66      | 1.01E-02 | yes |
| Frat2        | 17.63  | 9.05   | -0.96     | 1.01E-02 | yes |
| Faah         | 0.67   | 0.10   | -2.80     | 1.02E-02 | yes |
| Cmtm7        | 107.90 | 174.10 | 0.69      | 1.03E-02 | yes |
| Dek          | 132.00 | 83.34  | -0.66     | 1.03E-02 | yes |
| Ikzf1        | 122.75 | 85.37  | -0.52     | 1.04E-02 | yes |
| Laptm4b      | 3.28   | 8.27   | 1.33      | 1.04E-02 | yes |
| Hs6st1       | 11.01  | 18.96  | 0.78      | 1.04E-02 | yes |
| 4930523C07Ri | 35.72  | 22.99  | -0.64     | 1.04E-02 | yes |
| Ccdc17       | 1.04   | 3.09   | 1.57      | 1.04E-02 | yes |
| Chst1        | 0.07   | 0.92   | 3.73      | 1.04E-02 | yes |
| Unc5cl       | 1.07   | 3.01   | 1.49      | 1.05E-02 | yes |
| Gimap6       | 37.68  | 63.15  | 0.74      | 1.05E-02 | yes |
| Impdh2       | 140.85 | 88.76  | -0.67     | 1.05E-02 | yes |
| Plcd3        | 5.99   | 2.58   | -1.21     | 1.05E-02 | yes |
| Ncapg        | 47.13  | 29.37  | -0.68     | 1.05E-02 | yes |
| B2m          | 247.50 | 394.29 | 0.67      | 1.06E-02 | yes |
| F2rl2        | 0.00   | 0.46   | 1.79769e+ | 1.07E-02 | yes |
| Enpp4        | 1.42   | 3.62   | 1.36      | 1.07E-02 | yes |
| Pole         | 29.35  | 18.52  | -0.66     | 1.07E-02 | yes |
| Pecam1       | 30.08  | 18.86  | -0.67     | 1.09E-02 | yes |
| Nphp4        | 3.71   | 1.67   | -1.15     | 1.09E-02 | yes |

|              |       |       |       |          |     |
|--------------|-------|-------|-------|----------|-----|
| Dip2c        | 1.32  | 2.90  | 1.14  | 1.10E-02 | yes |
| Isoc2b       | 1.64  | 4.99  | 1.60  | 1.11E-02 | yes |
| Sgsm1        | 1.44  | 3.40  | 1.24  | 1.11E-02 | yes |
| Marcksl1     | 78.29 | 48.53 | -0.69 | 1.11E-02 | yes |
| Rcc1         | 57.49 | 37.32 | -0.62 | 1.12E-02 | yes |
| Ltf          | 0.58  | 1.83  | 1.66  | 1.12E-02 | yes |
| Fbxo48       | 14.80 | 7.14  | -1.05 | 1.12E-02 | yes |
| Slc39a6      | 11.39 | 19.53 | 0.78  | 1.13E-02 | yes |
| Gpr63        | 0.99  | 0.14  | -2.78 | 1.13E-02 | yes |
| Zfp579       | 6.73  | 13.45 | 1.00  | 1.16E-02 | yes |
| Rfwd3        | 81.24 | 51.45 | -0.66 | 1.16E-02 | yes |
| Rad51        | 38.14 | 22.56 | -0.76 | 1.17E-02 | yes |
| Kif18a       | 20.00 | 11.38 | -0.81 | 1.17E-02 | yes |
| Phyh         | 15.77 | 29.73 | 0.91  | 1.17E-02 | yes |
| Kif20b       | 30.19 | 18.94 | -0.67 | 1.17E-02 | yes |
| Cd83         | 0.99  | 0.14  | -2.84 | 1.17E-02 | yes |
| Serpinb9     | 2.35  | 5.61  | 1.26  | 1.17E-02 | yes |
| Thbd         | 30.65 | 18.82 | -0.70 | 1.17E-02 | yes |
| Foxm1        | 61.02 | 38.71 | -0.66 | 1.17E-02 | yes |
| Mcm10        | 27.04 | 16.45 | -0.72 | 1.17E-02 | yes |
| Ski          | 2.10  | 0.83  | -1.34 | 1.18E-02 | yes |
| Crybg3       | 6.45  | 3.39  | -0.93 | 1.19E-02 | yes |
| 2900026A02Ri | 28.98 | 46.74 | 0.69  | 1.20E-02 | yes |
| Lgals8       | 18.59 | 29.76 | 0.68  | 1.21E-02 | yes |
| Smc2         | 54.67 | 34.78 | -0.65 | 1.21E-02 | yes |
| Tirap        | 6.82  | 3.40  | -1.00 | 1.21E-02 | yes |
| Recql4       | 14.58 | 8.22  | -0.83 | 1.23E-02 | yes |
| Mgat4a       | 10.43 | 5.98  | -0.80 | 1.23E-02 | yes |
| Il1r1l       | 0.27  | 1.25  | 2.21  | 1.24E-02 | yes |
| Cdk1         | 38.25 | 23.40 | -0.71 | 1.25E-02 | yes |
| Ptprn2       | 0.04  | 0.50  | 3.83  | 1.27E-02 | yes |
| Gm525        | 2.41  | 7.79  | 1.69  | 1.27E-02 | yes |
| Zxdc         | 6.31  | 10.90 | 0.79  | 1.28E-02 | yes |
| Pcmt1d1      | 32.00 | 50.74 | 0.67  | 1.31E-02 | yes |
| Apobec1      | 33.43 | 20.01 | -0.74 | 1.31E-02 | yes |
| Rag2         | 28.51 | 16.60 | -0.78 | 1.32E-02 | yes |
| Abhd15       | 2.89  | 6.44  | 1.16  | 1.32E-02 | yes |
| Cnn3         | 53.21 | 32.46 | -0.71 | 1.33E-02 | yes |
| Neil3        | 52.18 | 32.28 | -0.69 | 1.33E-02 | yes |
| Ercc6l       | 27.88 | 17.25 | -0.69 | 1.34E-02 | yes |
| Nkg7         | 2.61  | 8.12  | 1.63  | 1.34E-02 | yes |
| Glrp1        | 0.96  | 3.02  | 1.66  | 1.35E-02 | yes |

|              |        |        |           |          |     |
|--------------|--------|--------|-----------|----------|-----|
| 1600014C10Ri | 13.37  | 22.88  | 0.78      | 1.35E-02 | yes |
| Cdc20        | 72.74  | 45.71  | -0.67     | 1.35E-02 | yes |
| 1300002K09Ri | 0.08   | 0.67   | 3.02      | 1.37E-02 | yes |
| Ttk          | 28.33  | 17.18  | -0.72     | 1.37E-02 | yes |
| Cyp4f16      | 2.60   | 6.39   | 1.30      | 1.37E-02 | yes |
| Ifi2712a     | 61.30  | 29.99  | -1.03     | 1.37E-02 | yes |
| Pla2g4c      | 3.41   | 1.33   | -1.36     | 1.37E-02 | yes |
| Txnip        | 44.66  | 65.03  | 0.54      | 1.38E-02 | yes |
| Anp32e       | 114.53 | 73.44  | -0.64     | 1.39E-02 | yes |
| Ppm1f        | 21.61  | 13.37  | -0.69     | 1.39E-02 | yes |
| Igtp         | 9.54   | 18.03  | 0.92      | 1.39E-02 | yes |
| Armcx3       | 9.81   | 17.48  | 0.83      | 1.41E-02 | yes |
| Serac1       | 3.02   | 5.97   | 0.98      | 1.44E-02 | yes |
| Mobkl2a      | 20.76  | 34.16  | 0.72      | 1.44E-02 | yes |
| Pbk          | 63.16  | 38.50  | -0.71     | 1.45E-02 | yes |
| Rad51c       | 10.73  | 5.31   | -1.01     | 1.45E-02 | yes |
| Ptpre        | 3.22   | 6.27   | 0.96      | 1.49E-02 | yes |
| Ryr1         | 0.09   | 0.27   | 1.69      | 1.49E-02 | yes |
| Padi3        | 1.41   | 3.64   | 1.37      | 1.49E-02 | yes |
| Ccr7         | 25.03  | 41.91  | 0.74      | 1.49E-02 | yes |
| Pgam1        | 87.61  | 55.65  | -0.65     | 1.49E-02 | yes |
| Ptpn23       | 11.98  | 19.35  | 0.69      | 1.52E-02 | yes |
| Mthfr        | 4.83   | 8.23   | 0.77      | 1.58E-02 | yes |
| Wdr41        | 5.51   | 10.76  | 0.97      | 1.59E-02 | yes |
| Plcd1        | 0.03   | 1.33   | 5.69      | 1.60E-02 | yes |
| Fry          | 3.07   | 1.59   | -0.95     | 1.60E-02 | yes |
| Ctsl         | 2.60   | 6.44   | 1.31      | 1.61E-02 | yes |
| Sh3kbp1      | 31.70  | 46.69  | 0.56      | 1.62E-02 | yes |
| Ube2c        | 88.68  | 53.59  | -0.73     | 1.62E-02 | yes |
| Papss2       | 0.36   | 1.27   | 1.82      | 1.62E-02 | yes |
| Siglecg      | 84.26  | 54.21  | -0.64     | 1.62E-02 | yes |
| Ankle1       | 42.84  | 26.45  | -0.70     | 1.64E-02 | yes |
| Nckap5       | 0.00   | 0.19   | 1.79769e+ | 1.64E-02 | yes |
| Tmc6         | 29.06  | 44.83  | 0.63      | 1.65E-02 | yes |
| Trim2        | 5.70   | 2.90   | -0.98     | 1.65E-02 | yes |
| Cbx4         | 15.12  | 24.00  | 0.67      | 1.65E-02 | yes |
| Tnip1        | 11.22  | 18.82  | 0.75      | 1.67E-02 | yes |
| Hnrnpab      | 151.62 | 108.41 | -0.48     | 1.68E-02 | yes |
| Etv5         | 6.21   | 2.97   | -1.06     | 1.68E-02 | yes |
| Tmem140      | 1.93   | 4.74   | 1.30      | 1.69E-02 | yes |
| Klf8         | 1.23   | 3.05   | 1.31      | 1.69E-02 | yes |
| Gen1         | 20.06  | 11.65  | -0.78     | 1.69E-02 | yes |

|              |       |       |       |          |     |
|--------------|-------|-------|-------|----------|-----|
| Fam54a       | 16.66 | 8.71  | -0.94 | 1.69E-02 | yes |
| Kctd11       | 2.06  | 0.71  | -1.53 | 1.69E-02 | yes |
| Gcet2        | 2.28  | 0.70  | -1.71 | 1.70E-02 | yes |
| Znfx1        | 6.99  | 11.39 | 0.70  | 1.76E-02 | yes |
| Bub1b        | 62.60 | 40.46 | -0.63 | 1.76E-02 | yes |
| Plk4         | 30.65 | 19.03 | -0.69 | 1.77E-02 | yes |
| Phka2        | 17.13 | 11.07 | -0.63 | 1.79E-02 | yes |
| Mvp          | 6.05  | 11.38 | 0.91  | 1.81E-02 | yes |
| 0610031J06Ri | 23.43 | 39.93 | 0.77  | 1.81E-02 | yes |
| Rad54b       | 18.05 | 10.09 | -0.84 | 1.81E-02 | yes |
| Gbp5         | 3.26  | 7.06  | 1.11  | 1.82E-02 | yes |
| S100a8       | 6.79  | 19.30 | 1.51  | 1.83E-02 | yes |
| Card9        | 3.15  | 7.41  | 1.23  | 1.84E-02 | yes |
| H2-Q8        | 18.50 | 33.55 | 0.86  | 1.84E-02 | yes |
| Uty          | 1.81  | 4.07  | 1.16  | 1.84E-02 | yes |
| Dhcr7        | 11.07 | 19.40 | 0.81  | 1.84E-02 | yes |
| Asb10        | 0.73  | 0.06  | -3.56 | 1.84E-02 | yes |
| Slc25a20     | 6.69  | 13.75 | 1.04  | 1.84E-02 | yes |
| Gimap7       | 3.76  | 9.49  | 1.34  | 1.86E-02 | yes |
| Rps6ka2      | 3.55  | 6.70  | 0.92  | 1.87E-02 | yes |
| B3gnt9-ps    | 1.62  | 4.09  | 1.34  | 1.88E-02 | yes |
| Tmem119      | 2.33  | 5.79  | 1.31  | 1.89E-02 | yes |
| Ift122       | 8.62  | 4.72  | -0.87 | 1.90E-02 | yes |
| Acacb        | 0.26  | 0.73  | 1.50  | 1.90E-02 | yes |
| Agpat9       | 27.38 | 44.11 | 0.69  | 1.90E-02 | yes |
| Suz12        | 70.58 | 50.60 | -0.48 | 1.91E-02 | yes |
| 2310021P13Ri | 16.65 | 26.04 | 0.65  | 1.93E-02 | yes |
| Asf1b        | 70.08 | 44.24 | -0.66 | 1.95E-02 | yes |
| Mpeg1        | 6.20  | 11.33 | 0.87  | 1.96E-02 | yes |
| Fnip1        | 10.31 | 16.69 | 0.70  | 1.96E-02 | yes |
| Coro1b       | 55.95 | 86.91 | 0.64  | 1.96E-02 | yes |
| Bbc3         | 1.35  | 3.59  | 1.41  | 1.97E-02 | yes |
| Chek1        | 20.82 | 12.22 | -0.77 | 1.97E-02 | yes |
| Jakmip1      | 28.03 | 17.08 | -0.71 | 1.98E-02 | yes |
| Ceacam16     | 1.18  | 3.48  | 1.56  | 1.98E-02 | yes |
| Smpd13a      | 7.32  | 15.08 | 1.04  | 1.98E-02 | yes |
| H2-K2        | 3.89  | 9.20  | 1.24  | 1.99E-02 | yes |
| Tbc1d16      | 0.89  | 2.03  | 1.19  | 1.99E-02 | yes |
| Rnf26        | 56.76 | 36.15 | -0.65 | 2.00E-02 | yes |
| Pisd         | 22.07 | 36.34 | 0.72  | 2.03E-02 | yes |
| Hsd11b1      | 1.08  | 4.05  | 1.91  | 2.06E-02 | yes |
| Katnal1      | 6.84  | 3.75  | -0.87 | 2.08E-02 | yes |

|              |        |        |           |          |     |
|--------------|--------|--------|-----------|----------|-----|
| Fanci        | 17.10  | 10.42  | -0.71     | 2.08E-02 | yes |
| Wdr62        | 13.90  | 8.39   | -0.73     | 2.08E-02 | yes |
| Capn11       | 0.68   | 2.02   | 1.57      | 2.11E-02 | yes |
| Brip1        | 13.95  | 8.64   | -0.69     | 2.11E-02 | yes |
| Actn1        | 1.66   | 3.83   | 1.20      | 2.12E-02 | yes |
| Zbed4        | 16.76  | 10.39  | -0.69     | 2.12E-02 | yes |
| 6030408B16Ri | 6.93   | 2.92   | -1.25     | 2.12E-02 | yes |
| D18Ert653e   | 9.16   | 16.74  | 0.87      | 2.13E-02 | yes |
| Micall2      | 0.66   | 1.86   | 1.48      | 2.13E-02 | yes |
| 6430527G18Ri | 6.73   | 3.44   | -0.97     | 2.13E-02 | yes |
| Ccdc40       | 0.25   | 0.77   | 1.59      | 2.15E-02 | yes |
| Aurka        | 40.15  | 24.63  | -0.71     | 2.15E-02 | yes |
| Rsph1        | 20.09  | 9.78   | -1.04     | 2.17E-02 | yes |
| Magee2       | 3.63   | 1.37   | -1.41     | 2.17E-02 | yes |
| Mcm5         | 76.52  | 50.17  | -0.61     | 2.19E-02 | yes |
| Adamts3      | 0.00   | 0.18   | 1.79769e+ | 2.20E-02 | yes |
| Exo1         | 13.17  | 7.98   | -0.72     | 2.20E-02 | yes |
| Kcnj2        | 0.98   | 0.31   | -1.66     | 2.21E-02 | yes |
| Sema4d       | 30.47  | 46.88  | 0.62      | 2.22E-02 | yes |
| Zfp28        | 1.28   | 3.04   | 1.24      | 2.22E-02 | yes |
| Apbb1        | 3.16   | 6.79   | 1.11      | 2.22E-02 | yes |
| Il27ra       | 6.28   | 11.80  | 0.91      | 2.22E-02 | yes |
| Tspan32      | 17.94  | 30.10  | 0.75      | 2.23E-02 | yes |
| Gm672        | 0.55   | 1.38   | 1.33      | 2.24E-02 | yes |
| Nlr1         | 2.65   | 5.37   | 1.02      | 2.24E-02 | yes |
| S100a9       | 8.17   | 20.06  | 1.30      | 2.25E-02 | yes |
| Acsl4        | 21.94  | 14.52  | -0.60     | 2.26E-02 | yes |
| Xaf1         | 12.53  | 21.57  | 0.78      | 2.27E-02 | yes |
| Arap3        | 0.68   | 1.74   | 1.37      | 2.28E-02 | yes |
| Osm          | 3.12   | 7.17   | 1.20      | 2.29E-02 | yes |
| Vwa5a        | 11.76  | 18.87  | 0.68      | 2.31E-02 | yes |
| Lta          | 0.35   | 1.52   | 2.12      | 2.34E-02 | yes |
| Ywhah        | 164.40 | 108.00 | -0.61     | 2.34E-02 | yes |
| Cd2          | 6.78   | 2.52   | -1.43     | 2.34E-02 | yes |
| Cenpa        | 68.10  | 42.34  | -0.69     | 2.35E-02 | yes |
| Nfe2l2       | 23.54  | 37.60  | 0.68      | 2.38E-02 | yes |
| Smchd1       | 39.81  | 26.14  | -0.61     | 2.39E-02 | yes |
| Ckap2        | 29.72  | 18.18  | -0.71     | 2.40E-02 | yes |
| Ctsd         | 29.09  | 46.56  | 0.68      | 2.41E-02 | yes |
| Nt5dc2       | 36.57  | 21.21  | -0.79     | 2.41E-02 | yes |
| Zwilch       | 23.97  | 14.29  | -0.75     | 2.41E-02 | yes |
| Bcl2l1       | 34.88  | 21.68  | -0.69     | 2.42E-02 | yes |



|              |        |        |       |          |     |
|--------------|--------|--------|-------|----------|-----|
| Skp2         | 28.63  | 18.80  | -0.61 | 2.43E-02 | yes |
| Gm13157      | 7.86   | 14.60  | 0.89  | 2.46E-02 | yes |
| F630043A04Ri | 22.28  | 12.77  | -0.80 | 2.46E-02 | yes |
| Osbp2        | 0.03   | 0.51   | 4.21  | 2.46E-02 | yes |
| Wdr76        | 34.08  | 22.00  | -0.63 | 2.46E-02 | yes |
| Tlcd2        | 2.01   | 5.57   | 1.47  | 2.46E-02 | yes |
| Srsf10       | 133.81 | 97.16  | -0.46 | 2.46E-02 | yes |
| Vav2         | 16.52  | 26.18  | 0.66  | 2.48E-02 | yes |
| Pcna         | 483.76 | 314.02 | -0.62 | 2.48E-02 | yes |
| Slamf1       | 0.37   | 1.34   | 1.86  | 2.50E-02 | yes |
| Nfkbie       | 20.72  | 33.39  | 0.69  | 2.53E-02 | yes |
| Lhpp         | 15.09  | 26.43  | 0.81  | 2.55E-02 | yes |
| Fn3k         | 0.05   | 0.64   | 3.59  | 2.55E-02 | yes |
| lpmk         | 20.15  | 12.80  | -0.65 | 2.56E-02 | yes |
| Hspa1a       | 0.93   | 0.27   | -1.78 | 2.56E-02 | yes |
| Xk           | 9.71   | 5.43   | -0.84 | 2.57E-02 | yes |
| Plekhm2      | 5.10   | 9.06   | 0.83  | 2.62E-02 | yes |
| Cks2         | 95.46  | 57.70  | -0.73 | 2.63E-02 | yes |
| Ctsg         | 3.30   | 1.02   | -1.69 | 2.65E-02 | yes |
| Aqp1         | 1.14   | 0.35   | -1.71 | 2.66E-02 | yes |
| Capn5        | 4.72   | 8.48   | 0.85  | 2.68E-02 | yes |
| Nipa1        | 0.76   | 2.38   | 1.64  | 2.70E-02 | yes |
| Dkk1         | 4.08   | 9.98   | 1.29  | 2.73E-02 | yes |
| Lama4        | 0.08   | 0.35   | 2.04  | 2.73E-02 | yes |
| Ugt1a7c      | 2.85   | 6.27   | 1.14  | 2.73E-02 | yes |
| Arhgap33     | 27.99  | 18.14  | -0.63 | 2.73E-02 | yes |
| Prtn3        | 5.19   | 1.82   | -1.51 | 2.73E-02 | yes |
| Abcg1        | 11.66  | 18.38  | 0.66  | 2.73E-02 | yes |
| Abcb1b       | 3.77   | 7.14   | 0.92  | 2.75E-02 | yes |
| Mxd1         | 5.64   | 9.87   | 0.81  | 2.75E-02 | yes |
| Cdca3        | 62.30  | 39.59  | -0.65 | 2.76E-02 | yes |
| Cenpn        | 38.72  | 23.57  | -0.72 | 2.77E-02 | yes |
| Sspn         | 1.05   | 0.34   | -1.62 | 2.77E-02 | yes |
| C530008M17R  | 0.27   | 0.75   | 1.48  | 2.86E-02 | yes |
| Anxa4        | 3.75   | 8.29   | 1.14  | 2.86E-02 | yes |
| Lyst         | 8.30   | 12.75  | 0.62  | 2.86E-02 | yes |
| Ppil5        | 15.41  | 7.60   | -1.02 | 2.86E-02 | yes |
| Itm2c        | 7.44   | 14.09  | 0.92  | 2.87E-02 | yes |
| Lonrf3       | 1.81   | 0.79   | -1.19 | 2.87E-02 | yes |
| Aurkb        | 63.79  | 41.45  | -0.62 | 2.88E-02 | yes |
| Adck2        | 3.73   | 7.29   | 0.97  | 2.88E-02 | yes |
| Ndc80        | 32.76  | 20.27  | -0.69 | 2.89E-02 | yes |

|          |        |        |       |          |     |
|----------|--------|--------|-------|----------|-----|
| Hspd1    | 140.31 | 93.17  | -0.59 | 2.93E-02 | yes |
| Cdyl2    | 3.29   | 6.93   | 1.07  | 2.94E-02 | yes |
| Lrdd     | 26.58  | 16.66  | -0.67 | 2.95E-02 | yes |
| Fam107b  | 93.64  | 62.17  | -0.59 | 2.96E-02 | yes |
| Pdzd4    | 3.74   | 7.02   | 0.91  | 2.96E-02 | yes |
| Fbxo5    | 65.36  | 42.08  | -0.64 | 2.98E-02 | yes |
| Paqr8    | 1.20   | 2.84   | 1.25  | 3.01E-02 | yes |
| Crtc1    | 6.63   | 10.87  | 0.71  | 3.02E-02 | yes |
| Bach1    | 11.24  | 17.81  | 0.66  | 3.03E-02 | yes |
| Khdrbs3  | 4.84   | 1.97   | -1.30 | 3.05E-02 | yes |
| Carns1   | 21.22  | 33.37  | 0.65  | 3.07E-02 | yes |
| Ppp1r9b  | 23.16  | 35.68  | 0.62  | 3.07E-02 | yes |
| Cd4      | 0.22   | 0.82   | 1.88  | 3.08E-02 | yes |
| Gpr56    | 89.77  | 132.74 | 0.56  | 3.10E-02 | yes |
| Ly6a     | 7.28   | 17.86  | 1.29  | 3.10E-02 | yes |
| Ncapd3   | 33.45  | 22.11  | -0.60 | 3.11E-02 | yes |
| Parvb    | 4.54   | 2.12   | -1.10 | 3.12E-02 | yes |
| Acox1    | 8.34   | 13.96  | 0.74  | 3.12E-02 | yes |
| Mfhas1   | 1.47   | 0.61   | -1.28 | 3.12E-02 | yes |
| Pkd1l3   | 2.43   | 4.94   | 1.02  | 3.14E-02 | yes |
| Uaca     | 16.59  | 25.54  | 0.62  | 3.14E-02 | yes |
| Trim36   | 0.99   | 0.28   | -1.80 | 3.15E-02 | yes |
| Spint2   | 19.31  | 33.01  | 0.77  | 3.15E-02 | yes |
| Dhfr     | 16.05  | 10.06  | -0.67 | 3.15E-02 | yes |
| Slc45a3  | 1.10   | 0.18   | -2.59 | 3.16E-02 | yes |
| Sh3bgrl2 | 1.42   | 3.31   | 1.22  | 3.20E-02 | yes |
| Sec24a   | 6.11   | 10.03  | 0.72  | 3.20E-02 | yes |
| Mad2l1   | 54.84  | 34.64  | -0.66 | 3.22E-02 | yes |
| Clcn7    | 12.20  | 19.37  | 0.67  | 3.25E-02 | yes |
| Uevld    | 13.09  | 7.79   | -0.75 | 3.25E-02 | yes |
| BC094916 | 36.60  | 21.26  | -0.78 | 3.27E-02 | yes |
| Ssx2ip   | 11.54  | 6.46   | -0.84 | 3.29E-02 | yes |
| Maged2   | 2.18   | 4.97   | 1.19  | 3.29E-02 | yes |
| Ddit4    | 11.99  | 21.36  | 0.83  | 3.29E-02 | yes |
| B3gnt5   | 21.64  | 14.54  | -0.57 | 3.29E-02 | yes |
| Hspa12a  | 0.42   | 0.12   | -1.81 | 3.29E-02 | yes |
| Nsl1     | 22.22  | 13.62  | -0.71 | 3.32E-02 | yes |
| Lpin1    | 0.96   | 2.16   | 1.18  | 3.32E-02 | yes |
| Tmem8b   | 1.22   | 2.74   | 1.17  | 3.35E-02 | yes |
| Cacnb2   | 0.63   | 1.75   | 1.47  | 3.37E-02 | yes |
| Fggy     | 1.62   | 4.02   | 1.31  | 3.42E-02 | yes |
| Pfkip    | 12.49  | 19.80  | 0.67  | 3.42E-02 | yes |

|              |        |        |            |          |     |
|--------------|--------|--------|------------|----------|-----|
| Bend4        | 3.15   | 1.61   | -0.97      | 3.42E-02 | yes |
| Sgsh         | 3.80   | 6.94   | 0.87       | 3.47E-02 | yes |
| Zmym6        | 8.73   | 14.54  | 0.74       | 3.47E-02 | yes |
| Psrc1        | 21.17  | 12.30  | -0.78      | 3.47E-02 | yes |
| Ldhb         | 0.96   | 2.96   | 1.62       | 3.49E-02 | yes |
| Sec16b       | 0.27   | 0.00   | -1.79769e- | 3.50E-02 | yes |
| Anp32b       | 249.51 | 166.81 | -0.58      | 3.51E-02 | yes |
| Fchsd1       | 4.22   | 7.58   | 0.85       | 3.53E-02 | yes |
| Gm5577       | 1.26   | 0.13   | -3.25      | 3.53E-02 | yes |
| 9530077C05Ri | 12.85  | 6.76   | -0.93      | 3.53E-02 | yes |
| Gria2        | 1.11   | 2.57   | 1.21       | 3.55E-02 | yes |
| Incenp       | 68.21  | 45.71  | -0.58      | 3.58E-02 | yes |
| Kcnh4        | 0.16   | 0.63   | 2.01       | 3.59E-02 | yes |
| Usp27x       | 0.75   | 1.96   | 1.39       | 3.59E-02 | yes |
| Depdc1b      | 22.38  | 13.42  | -0.74      | 3.61E-02 | yes |
| D2Ert750e    | 30.49  | 19.64  | -0.63      | 3.62E-02 | yes |
| 8430410A17Ri | 20.67  | 11.21  | -0.88      | 3.62E-02 | yes |
| Tfdp1        | 114.93 | 76.88  | -0.58      | 3.62E-02 | yes |
| Csrnp1       | 24.86  | 38.42  | 0.63       | 3.63E-02 | yes |
| Gm12250      | 6.58   | 12.16  | 0.89       | 3.64E-02 | yes |
| Rrm1         | 76.02  | 51.06  | -0.57      | 3.67E-02 | yes |
| Lrrc33       | 34.41  | 51.83  | 0.59       | 3.68E-02 | yes |
| Cplx2        | 67.89  | 104.96 | 0.63       | 3.73E-02 | yes |
| Sema4b       | 17.24  | 26.60  | 0.63       | 3.73E-02 | yes |
| Gucy1a3      | 0.00   | 0.17   | 1.79769e+  | 3.75E-02 | yes |
| Abcb1a       | 0.51   | 1.32   | 1.36       | 3.78E-02 | yes |
| Trpc3        | 0.02   | 0.68   | 5.21       | 3.78E-02 | yes |
| Itgb3        | 2.25   | 4.32   | 0.94       | 3.80E-02 | yes |
| Pknox1       | 28.31  | 19.63  | -0.53      | 3.81E-02 | yes |
| Chaf1a       | 37.70  | 25.00  | -0.59      | 3.81E-02 | yes |
| 4930547N16Ri | 17.75  | 10.84  | -0.71      | 3.83E-02 | yes |
| Manba        | 8.15   | 13.63  | 0.74       | 3.87E-02 | yes |
| Hist1h1d     | 1.96   | 0.74   | -1.41      | 3.87E-02 | yes |
| Rhof         | 1.94   | 0.67   | -1.53      | 3.87E-02 | yes |
| Rasal1       | 9.96   | 5.48   | -0.86      | 3.87E-02 | yes |
| Spc24        | 38.28  | 23.09  | -0.73      | 3.90E-02 | yes |
| Mcm7         | 134.86 | 90.76  | -0.57      | 3.94E-02 | yes |
| Pla2g16      | 3.37   | 6.70   | 0.99       | 3.94E-02 | yes |
| Akap6        | 0.02   | 0.19   | 3.38       | 3.96E-02 | yes |
| 9430015G10Ri | 28.52  | 18.53  | -0.62      | 3.96E-02 | yes |
| Ankrd57      | 0.81   | 0.27   | -1.57      | 4.02E-02 | yes |
| Pgr          | 0.02   | 0.25   | 3.50       | 4.02E-02 | yes |

|               |        |       |           |          |     |
|---------------|--------|-------|-----------|----------|-----|
| Wdsub1        | 3.55   | 7.40  | 1.06      | 4.05E-02 | yes |
| Spata6        | 13.98  | 23.29 | 0.74      | 4.07E-02 | yes |
| Tbc1d2b       | 4.18   | 7.14  | 0.77      | 4.08E-02 | yes |
| Mybl1         | 7.60   | 3.98  | -0.93     | 4.08E-02 | yes |
| Palm3         | 0.24   | 0.84  | 1.79      | 4.08E-02 | yes |
| Slc16a1       | 66.02  | 44.52 | -0.57     | 4.08E-02 | yes |
| Tmem109       | 26.16  | 15.77 | -0.73     | 4.09E-02 | yes |
| Retnlg        | 0.34   | 3.26  | 3.28      | 4.09E-02 | yes |
| Sykb          | 105.73 | 74.81 | -0.50     | 4.09E-02 | yes |
| Rmnd1         | 7.43   | 13.90 | 0.90      | 4.10E-02 | yes |
| D17H6S56E-3   | 3.01   | 5.68  | 0.92      | 4.10E-02 | yes |
| Hnrnpc        | 125.61 | 96.53 | -0.38     | 4.17E-02 | yes |
| Cdca8         | 58.80  | 38.38 | -0.62     | 4.19E-02 | yes |
| Gm13152       | 0.54   | 2.06  | 1.93      | 4.23E-02 | yes |
| Itgb1         | 23.64  | 35.71 | 0.60      | 4.27E-02 | yes |
| Slbp          | 86.47  | 57.57 | -0.59     | 4.27E-02 | yes |
| Dlgap3        | 0.04   | 0.50  | 3.80      | 4.28E-02 | yes |
| Susd3         | 3.70   | 1.38  | -1.43     | 4.29E-02 | yes |
| Fam119a       | 2.50   | 5.40  | 1.11      | 4.30E-02 | yes |
| Pank1         | 6.15   | 3.15  | -0.96     | 4.30E-02 | yes |
| Ly75          | 3.92   | 6.91  | 0.82      | 4.31E-02 | yes |
| Cisd3         | 3.82   | 1.21  | -1.65     | 4.33E-02 | yes |
| Odf3b         | 1.79   | 4.72  | 1.39      | 4.33E-02 | yes |
| Myo5a         | 9.76   | 6.39  | -0.61     | 4.34E-02 | yes |
| Hist2h2be     | 13.83  | 7.61  | -0.86     | 4.34E-02 | yes |
| Rgs10         | 7.04   | 2.84  | -1.31     | 4.38E-02 | yes |
| St8sia6       | 0.29   | 0.00  | -1.79769e | 4.43E-02 | yes |
| Klra2         | 0.43   | 0.00  | -1.79769e | 4.43E-02 | yes |
| Ccdc122       | 0.68   | 2.16  | 1.67      | 4.43E-02 | yes |
| Pnmal2        | 0.12   | 0.60  | 2.34      | 4.47E-02 | yes |
| Plcg1         | 22.41  | 34.05 | 0.60      | 4.50E-02 | yes |
| Celsr1        | 4.41   | 6.85  | 0.63      | 4.54E-02 | yes |
| Mycl1         | 0.19   | 0.69  | 1.86      | 4.54E-02 | yes |
| Cd59a         | 1.20   | 3.27  | 1.45      | 4.54E-02 | yes |
| Sele          | 0.22   | 0.00  | -1.79769e | 4.57E-02 | yes |
| Vim           | 82.86  | 55.46 | -0.58     | 4.57E-02 | yes |
| Ksr1          | 6.79   | 11.20 | 0.72      | 4.61E-02 | yes |
| Mgst2         | 19.11  | 36.97 | 0.95      | 4.61E-02 | yes |
| Sirt2         | 18.58  | 28.96 | 0.64      | 4.67E-02 | yes |
| 4930572J05RiH | 18.46  | 30.60 | 0.73      | 4.68E-02 | yes |
| Mex3b         | 10.61  | 6.02  | -0.82     | 4.74E-02 | yes |
| Lrrc27        | 1.32   | 3.26  | 1.30      | 4.76E-02 | yes |

|              |        |       |            |          |     |
|--------------|--------|-------|------------|----------|-----|
| Gimap5       | 8.24   | 14.94 | 0.86       | 4.78E-02 | yes |
| Cdc25c       | 17.10  | 9.59  | -0.83      | 4.80E-02 | yes |
| Hnf1b        | 0.56   | 1.63  | 1.55       | 4.82E-02 | yes |
| Edn2         | 0.00   | 0.39  | 1.79769e+  | 4.82E-02 | yes |
| Chtf18       | 19.72  | 12.39 | -0.67      | 4.82E-02 | yes |
| Zc3h12a      | 8.36   | 14.12 | 0.76       | 4.84E-02 | yes |
| Ctps         | 24.45  | 15.36 | -0.67      | 4.87E-02 | yes |
| Lcn2         | 0.57   | 2.41  | 2.08       | 4.88E-02 | yes |
| Eef2k        | 38.45  | 57.21 | 0.57       | 4.88E-02 | yes |
| Cad          | 31.67  | 21.57 | -0.55      | 4.93E-02 | yes |
| Tmem154      | 4.78   | 8.92  | 0.90       | 4.97E-02 | yes |
| Mns1         | 21.47  | 12.84 | -0.74      | 4.97E-02 | yes |
| Ptpn6        | 59.18  | 40.35 | -0.55      | 4.98E-02 | yes |
| Rangap1      | 61.35  | 42.32 | -0.54      | 4.99E-02 | yes |
| Gm6682       | 44.27  | 27.49 | -0.69      | 5.00E-02 | yes |
| Hnrnp3       | 24.14  | 14.49 | -0.74      | 5.00E-02 | yes |
| Ran          | 126.45 | 86.32 | -0.55      | 5.08E-02 | no  |
| Eif1ad       | 42.94  | 28.37 | -0.60      | 5.09E-02 | no  |
| 4632428C04Ri | 3.05   | 1.28  | -1.25      | 5.11E-02 | no  |
| Aig1         | 2.32   | 5.73  | 1.30       | 5.12E-02 | no  |
| Brwd1        | 8.13   | 5.26  | -0.63      | 5.14E-02 | no  |
| Armcx6       | 1.47   | 3.55  | 1.27       | 5.18E-02 | no  |
| Ska1         | 13.25  | 7.74  | -0.78      | 5.18E-02 | no  |
| Flrt1        | 0.27   | 0.06  | -2.16      | 5.18E-02 | no  |
| Med13l       | 22.61  | 33.92 | 0.58       | 5.20E-02 | no  |
| Ngly1        | 14.41  | 23.00 | 0.67       | 5.20E-02 | no  |
| Gna11        | 19.62  | 30.10 | 0.62       | 5.21E-02 | no  |
| Mlh3         | 4.48   | 7.67  | 0.78       | 5.24E-02 | no  |
| Cpt1a        | 26.30  | 38.93 | 0.57       | 5.24E-02 | no  |
| Map4k2       | 54.74  | 81.17 | 0.57       | 5.24E-02 | no  |
| Gsto1        | 14.92  | 26.45 | 0.83       | 5.27E-02 | no  |
| Cep290       | 3.09   | 5.23  | 0.76       | 5.27E-02 | no  |
| Mtor         | 18.91  | 12.84 | -0.56      | 5.27E-02 | no  |
| Gclc         | 45.38  | 30.18 | -0.59      | 5.28E-02 | no  |
| Bend5        | 2.63   | 5.72  | 1.12       | 5.32E-02 | no  |
| St3gal6      | 15.76  | 8.31  | -0.92      | 5.32E-02 | no  |
| Hepacam2     | 0.28   | 0.00  | -1.79769e- | 5.33E-02 | no  |
| Lingo1       | 0.00   | 0.15  | 1.79769e+  | 5.37E-02 | no  |
| Foxred2      | 6.60   | 10.56 | 0.68       | 5.38E-02 | no  |
| Mxd4         | 20.45  | 34.02 | 0.73       | 5.39E-02 | no  |
| Gsg2         | 20.28  | 12.67 | -0.68      | 5.41E-02 | no  |
| Trim6        | 1.17   | 2.78  | 1.25       | 5.42E-02 | no  |

|         |        |        |           |          |    |
|---------|--------|--------|-----------|----------|----|
| Pik3r4  | 11.24  | 17.20  | 0.61      | 5.42E-02 | no |
| Gpsm2   | 18.53  | 11.71  | -0.66     | 5.44E-02 | no |
| Eri1    | 31.16  | 21.06  | -0.57     | 5.45E-02 | no |
| Wwox    | 2.84   | 5.86   | 1.05      | 5.52E-02 | no |
| Chpf    | 3.76   | 1.64   | -1.19     | 5.54E-02 | no |
| Rdm1    | 21.70  | 11.76  | -0.88     | 5.54E-02 | no |
| Pipox   | 7.81   | 3.73   | -1.07     | 5.54E-02 | no |
| Chd2    | 12.20  | 18.06  | 0.57      | 5.55E-02 | no |
| Mms22l  | 24.81  | 16.48  | -0.59     | 5.55E-02 | no |
| H2-D1   | 127.40 | 187.18 | 0.56      | 5.55E-02 | no |
| Arl8a   | 14.59  | 24.35  | 0.74      | 5.61E-02 | no |
| Dgke    | 15.45  | 23.15  | 0.58      | 5.62E-02 | no |
| Dnajc9  | 74.27  | 49.91  | -0.57     | 5.62E-02 | no |
| Galns   | 16.08  | 9.81   | -0.71     | 5.62E-02 | no |
| Cdkn2c  | 41.78  | 25.00  | -0.74     | 5.62E-02 | no |
| Spna1   | 0.06   | 0.00   | -1.79769e | 5.65E-02 | no |
| Rnf141  | 31.29  | 17.43  | -0.84     | 5.65E-02 | no |
| Slc38a7 | 4.51   | 8.18   | 0.86      | 5.65E-02 | no |
| Pde8a   | 1.72   | 3.80   | 1.14      | 5.67E-02 | no |
| Gm16386 | 1.67   | 5.00   | 1.58      | 5.67E-02 | no |
| Diap3   | 16.07  | 9.99   | -0.69     | 5.67E-02 | no |
| Ccdc34  | 19.48  | 11.38  | -0.77     | 5.67E-02 | no |
| Rnase12 | 7.45   | 18.39  | 1.30      | 5.71E-02 | no |
| Add3    | 23.19  | 16.11  | -0.53     | 5.71E-02 | no |
| Rassf2  | 24.23  | 36.00  | 0.57      | 5.71E-02 | no |
| Dgcr8   | 33.42  | 22.60  | -0.56     | 5.72E-02 | no |
| Trem12  | 20.65  | 30.54  | 0.56      | 5.73E-02 | no |
| Slc35c2 | 16.77  | 27.07  | 0.69      | 5.77E-02 | no |
| Hirip3  | 37.19  | 24.94  | -0.58     | 5.77E-02 | no |
| Mis12   | 29.90  | 19.55  | -0.61     | 5.77E-02 | no |
| Kcnh2   | 0.09   | 0.38   | 2.03      | 5.77E-02 | no |
| Fam102a | 2.83   | 5.29   | 0.90      | 5.77E-02 | no |
| Orai1   | 6.96   | 12.90  | 0.89      | 5.77E-02 | no |
| Atf6    | 13.70  | 9.09   | -0.59     | 5.77E-02 | no |
| Prtg    | 0.07   | 0.26   | 1.89      | 5.81E-02 | no |
| Zfp831  | 6.11   | 9.41   | 0.62      | 5.82E-02 | no |
| Cpne5   | 4.36   | 2.28   | -0.94     | 5.85E-02 | no |
| Eme1    | 19.13  | 11.65  | -0.72     | 5.86E-02 | no |
| Lman2l  | 22.11  | 34.30  | 0.63      | 5.86E-02 | no |
| Gna15   | 6.83   | 12.46  | 0.87      | 5.86E-02 | no |
| Zfp715  | 17.95  | 27.10  | 0.59      | 5.87E-02 | no |
| Ehd1    | 15.77  | 9.77   | -0.69     | 5.87E-02 | no |

|              |        |        |           |          |    |
|--------------|--------|--------|-----------|----------|----|
| Nup160       | 24.76  | 16.76  | -0.56     | 5.92E-02 | no |
| Man2b2       | 9.90   | 15.67  | 0.66      | 5.94E-02 | no |
| Slc25a36     | 18.50  | 28.70  | 0.63      | 5.94E-02 | no |
| 2810408A11Ri | 6.76   | 3.25   | -1.06     | 5.94E-02 | no |
| Mki67        | 179.58 | 110.52 | -0.70     | 5.95E-02 | no |
| H2-T10       | 19.76  | 31.39  | 0.67      | 5.96E-02 | no |
| Nup133       | 17.71  | 11.80  | -0.59     | 5.96E-02 | no |
| Pard6g       | 15.61  | 9.53   | -0.71     | 5.96E-02 | no |
| Fam43a       | 31.49  | 46.55  | 0.56      | 5.97E-02 | no |
| Bach2        | 71.82  | 48.29  | -0.57     | 5.99E-02 | no |
| Ngp          | 2.49   | 5.89   | 1.24      | 6.00E-02 | no |
| 3425401B19Ri | 0.08   | 0.00   | -1.79769e | 6.00E-02 | no |
| Kif23        | 47.67  | 32.57  | -0.55     | 6.00E-02 | no |
| Fyb          | 0.63   | 1.65   | 1.40      | 6.01E-02 | no |
| Lass6        | 3.78   | 1.85   | -1.03     | 6.01E-02 | no |
| Ifi44        | 4.13   | 8.14   | 0.98      | 6.02E-02 | no |
| Ccdc99       | 17.38  | 10.58  | -0.72     | 6.05E-02 | no |
| Itgb2        | 14.52  | 22.52  | 0.63      | 6.07E-02 | no |
| Cdc23        | 26.13  | 17.45  | -0.58     | 6.08E-02 | no |
| B3gnt3       | 1.57   | 3.72   | 1.24      | 6.09E-02 | no |
| Ddx60        | 2.09   | 4.00   | 0.94      | 6.13E-02 | no |
| Tmem48       | 22.12  | 13.69  | -0.69     | 6.13E-02 | no |
| Ssrp1        | 112.35 | 81.94  | -0.46     | 6.14E-02 | no |
| Sorl1        | 4.22   | 2.40   | -0.81     | 6.15E-02 | no |
| Mdfic        | 3.63   | 6.82   | 0.91      | 6.17E-02 | no |
| Ahdc1        | 12.63  | 8.30   | -0.61     | 6.17E-02 | no |
| Igsf3        | 0.36   | 0.12   | -1.57     | 6.17E-02 | no |
| Ly6d         | 45.12  | 72.45  | 0.68      | 6.18E-02 | no |
| Tlr4         | 4.94   | 8.86   | 0.84      | 6.22E-02 | no |
| Sash3        | 51.75  | 75.38  | 0.54      | 6.22E-02 | no |
| Carm1        | 24.21  | 16.00  | -0.60     | 6.22E-02 | no |
| Atoh8        | 0.55   | 0.09   | -2.54     | 6.23E-02 | no |
| Lrp4         | 0.17   | 0.51   | 1.59      | 6.25E-02 | no |
| Cdc27        | 31.72  | 21.73  | -0.55     | 6.25E-02 | no |
| Rcsd1        | 92.94  | 124.88 | 0.43      | 6.30E-02 | no |
| Phldb3       | 19.81  | 30.15  | 0.61      | 6.31E-02 | no |
| Cd300c       | 0.18   | 2.40   | 3.72      | 6.34E-02 | no |
| Ttf2         | 22.69  | 15.31  | -0.57     | 6.34E-02 | no |
| Lmnb1        | 136.16 | 93.85  | -0.54     | 6.35E-02 | no |
| C1qb         | 1.31   | 0.23   | -2.52     | 6.38E-02 | no |
| Exoc6b       | 1.28   | 2.64   | 1.04      | 6.39E-02 | no |
| Cst7         | 3.38   | 7.76   | 1.20      | 6.50E-02 | no |

|              |        |        |           |          |    |
|--------------|--------|--------|-----------|----------|----|
| Robo4        | 1.55   | 0.61   | -1.34     | 6.56E-02 | no |
| Chml         | 13.53  | 8.78   | -0.62     | 6.58E-02 | no |
| Tlr1         | 1.69   | 0.62   | -1.45     | 6.62E-02 | no |
| Gm10584      | 1.76   | 0.71   | -1.30     | 6.62E-02 | no |
| Sh2b1        | 44.59  | 59.66  | 0.42      | 6.63E-02 | no |
| Txlnb        | 0.07   | 0.34   | 2.39      | 6.64E-02 | no |
| Arrdc5       | 0.95   | 2.83   | 1.58      | 6.64E-02 | no |
| Traip        | 11.72  | 6.80   | -0.78     | 6.64E-02 | no |
| Srsf1        | 117.22 | 89.03  | -0.40     | 6.69E-02 | no |
| Alms1        | 12.38  | 8.40   | -0.56     | 6.72E-02 | no |
| Lin54        | 14.91  | 9.75   | -0.61     | 6.77E-02 | no |
| Zdhhc13      | 14.95  | 23.85  | 0.67      | 6.78E-02 | no |
| Armc3        | 0.72   | 1.82   | 1.33      | 6.79E-02 | no |
| Rab11fip5    | 1.96   | 3.78   | 0.95      | 6.80E-02 | no |
| Rell1        | 11.67  | 18.46  | 0.66      | 6.80E-02 | no |
| Tdp1         | 24.39  | 15.34  | -0.67     | 6.80E-02 | no |
| Larp1b       | 10.53  | 5.49   | -0.94     | 6.80E-02 | no |
| Wdr67        | 22.14  | 15.02  | -0.56     | 6.83E-02 | no |
| Scara5       | 0.00   | 0.15   | 1.79769e+ | 6.92E-02 | no |
| Hps1         | 9.79   | 15.76  | 0.69      | 6.92E-02 | no |
| Prkd2        | 30.40  | 44.38  | 0.55      | 6.92E-02 | no |
| 2610029G23Ri | 20.35  | 12.56  | -0.70     | 6.92E-02 | no |
| Ccdc18       | 10.08  | 6.19   | -0.70     | 6.92E-02 | no |
| Xkr5         | 4.92   | 2.56   | -0.94     | 6.92E-02 | no |
| Grn          | 24.43  | 36.67  | 0.59      | 6.93E-02 | no |
| Gpr174       | 2.01   | 4.05   | 1.01      | 6.93E-02 | no |
| Zfp367       | 29.35  | 19.68  | -0.58     | 6.96E-02 | no |
| Reep1        | 0.71   | 0.23   | -1.63     | 6.99E-02 | no |
| Rad18        | 20.33  | 12.92  | -0.65     | 6.99E-02 | no |
| Slc43a1      | 13.37  | 20.42  | 0.61      | 7.04E-02 | no |
| Srgn         | 100.89 | 66.83  | -0.59     | 7.04E-02 | no |
| E2f1         | 30.40  | 20.06  | -0.60     | 7.04E-02 | no |
| Abr          | 21.93  | 31.60  | 0.53      | 7.05E-02 | no |
| Car2         | 32.58  | 20.79  | -0.65     | 7.05E-02 | no |
| Kcnc3        | 1.05   | 0.44   | -1.27     | 7.05E-02 | no |
| Birc3        | 16.78  | 25.76  | 0.62      | 7.07E-02 | no |
| Pstpip1      | 9.42   | 16.11  | 0.77      | 7.08E-02 | no |
| Tubb5        | 357.88 | 239.14 | -0.58     | 7.08E-02 | no |
| Pde4a        | 2.94   | 1.49   | -0.98     | 7.08E-02 | no |
| Capns2       | 0.45   | 1.72   | 1.93      | 7.11E-02 | no |
| Pdlim2       | 8.12   | 14.67  | 0.85      | 7.11E-02 | no |
| Mapkapk3     | 7.94   | 13.19  | 0.73      | 7.11E-02 | no |



|              |        |        |            |          |    |
|--------------|--------|--------|------------|----------|----|
| Rfc1         | 37.19  | 25.76  | -0.53      | 7.11E-02 | no |
| Zyx          | 10.79  | 17.60  | 0.71       | 7.16E-02 | no |
| Cldn13       | 0.51   | 0.00   | -1.79769e- | 7.17E-02 | no |
| Ssh2         | 29.13  | 19.90  | -0.55      | 7.17E-02 | no |
| Hmox1        | 1.19   | 2.98   | 1.32       | 7.18E-02 | no |
| Mobkl2b      | 0.71   | 1.82   | 1.35       | 7.19E-02 | no |
| Grap         | 22.31  | 34.73  | 0.64       | 7.23E-02 | no |
| Ammecr1      | 16.19  | 9.87   | -0.71      | 7.23E-02 | no |
| Wscd1        | 0.18   | 0.62   | 1.80       | 7.39E-02 | no |
| Nlrc5        | 18.44  | 26.55  | 0.53       | 7.43E-02 | no |
| Gbp3         | 5.15   | 9.32   | 0.86       | 7.48E-02 | no |
| Slc1a5       | 122.18 | 178.75 | 0.55       | 7.53E-02 | no |
| Baiap2       | 11.34  | 6.89   | -0.72      | 7.61E-02 | no |
| Ptges3       | 122.02 | 85.04  | -0.52      | 7.65E-02 | no |
| Trip13       | 21.78  | 13.59  | -0.68      | 7.68E-02 | no |
| Rnps1        | 142.96 | 109.25 | -0.39      | 7.69E-02 | no |
| Sidt2        | 21.68  | 31.60  | 0.54       | 7.69E-02 | no |
| Fen1         | 57.34  | 39.54  | -0.54      | 7.69E-02 | no |
| Ints7        | 42.94  | 29.67  | -0.53      | 7.77E-02 | no |
| Strbp        | 20.97  | 14.61  | -0.52      | 7.83E-02 | no |
| Abcb9        | 0.33   | 0.90   | 1.45       | 7.84E-02 | no |
| Plxdc1       | 13.74  | 21.24  | 0.63       | 7.84E-02 | no |
| 4930422G04Ri | 15.69  | 10.67  | -0.56      | 7.84E-02 | no |
| Csgalnact1   | 5.51   | 9.32   | 0.76       | 7.88E-02 | no |
| Fam83f       | 0.07   | 0.51   | 2.77       | 7.94E-02 | no |
| Elovl6       | 37.33  | 25.97  | -0.52      | 7.94E-02 | no |
| Pqlc2        | 2.84   | 5.76   | 1.02       | 7.94E-02 | no |
| Cdt1         | 41.61  | 28.24  | -0.56      | 7.98E-02 | no |
| Ica1         | 0.54   | 1.46   | 1.44       | 8.02E-02 | no |
| H2-T22,H2-T9 | 25.16  | 38.18  | 0.60       | 8.03E-02 | no |
| Suv39h1      | 42.95  | 29.63  | -0.54      | 8.04E-02 | no |
| Mcm4         | 65.79  | 46.12  | -0.51      | 8.05E-02 | no |
| Tbc1d4       | 3.25   | 5.41   | 0.74       | 8.06E-02 | no |
| Ckap5        | 54.08  | 37.64  | -0.52      | 8.07E-02 | no |
| Rad51ap1     | 31.32  | 20.12  | -0.64      | 8.09E-02 | no |
| Kdm5b        | 6.80   | 10.56  | 0.64       | 8.10E-02 | no |
| Rbp1         | 1.56   | 0.60   | -1.38      | 8.11E-02 | no |
| Pla2r1       | 0.00   | 0.08   | 1.79769e+  | 8.13E-02 | no |
| Rb1          | 28.15  | 19.30  | -0.54      | 8.13E-02 | no |
| Thsd1        | 2.55   | 5.02   | 0.98       | 8.17E-02 | no |
| Rel          | 16.18  | 25.08  | 0.63       | 8.18E-02 | no |
| Gse1         | 44.40  | 58.47  | 0.40       | 8.18E-02 | no |

|              |        |       |            |          |    |
|--------------|--------|-------|------------|----------|----|
| Prrg4        | 3.53   | 6.84  | 0.96       | 8.19E-02 | no |
| Tspan2       | 20.90  | 13.88 | -0.59      | 8.19E-02 | no |
| Gm5465       | 7.98   | 4.38  | -0.86      | 8.19E-02 | no |
| 4-Mar        | 0.00   | 0.10  | 1.79769e+  | 8.21E-02 | no |
| Col6a4       | 0.03   | 0.18  | 2.48       | 8.21E-02 | no |
| Arhgap26     | 8.22   | 12.21 | 0.57       | 8.22E-02 | no |
| Nfatc2ip     | 23.50  | 15.62 | -0.59      | 8.23E-02 | no |
| Tonsl        | 16.22  | 10.79 | -0.59      | 8.25E-02 | no |
| Fah          | 0.49   | 1.46  | 1.58       | 8.27E-02 | no |
| Prrt3        | 0.37   | 0.97  | 1.39       | 8.27E-02 | no |
| Psmc1        | 66.52  | 45.46 | -0.55      | 8.30E-02 | no |
| Net1         | 25.77  | 17.92 | -0.52      | 8.33E-02 | no |
| Lrp11        | 0.27   | 0.81  | 1.58       | 8.33E-02 | no |
| Galnt12      | 10.16  | 16.65 | 0.71       | 8.33E-02 | no |
| Nudt21       | 103.66 | 71.17 | -0.54      | 8.38E-02 | no |
| Cacybp       | 57.42  | 38.29 | -0.58      | 8.38E-02 | no |
| Gpr146       | 3.27   | 8.23  | 1.33       | 8.39E-02 | no |
| Fbxo32       | 4.06   | 7.52  | 0.89       | 8.42E-02 | no |
| 1700096K18Ri | 1.35   | 3.38  | 1.33       | 8.43E-02 | no |
| C330019L16Ri | 1.66   | 3.29  | 0.99       | 8.43E-02 | no |
| Nup155       | 23.65  | 16.40 | -0.53      | 8.43E-02 | no |
| 11-Sep       | 51.73  | 35.76 | -0.53      | 8.43E-02 | no |
| Orc6         | 31.91  | 20.51 | -0.64      | 8.43E-02 | no |
| Hmgn1        | 44.99  | 28.67 | -0.65      | 8.46E-02 | no |
| Tpmt         | 1.02   | 0.36  | -1.51      | 8.46E-02 | no |
| Dusp22       | 16.21  | 9.87  | -0.72      | 8.52E-02 | no |
| Cep76        | 13.57  | 8.56  | -0.66      | 8.53E-02 | no |
| Sgip1        | 0.19   | 0.58  | 1.60       | 8.54E-02 | no |
| Nlrp1a       | 1.43   | 2.94  | 1.04       | 8.54E-02 | no |
| Smtnl2       | 19.96  | 30.08 | 0.59       | 8.54E-02 | no |
| Gpr25        | 0.46   | 1.44  | 1.64       | 8.56E-02 | no |
| H2afv        | 51.28  | 34.41 | -0.58      | 8.66E-02 | no |
| Pxn          | 24.21  | 33.82 | 0.48       | 8.68E-02 | no |
| 1700034F02Ri | 0.27   | 0.00  | -1.79769e- | 8.69E-02 | no |
| Ccnd2        | 30.82  | 43.91 | 0.51       | 8.69E-02 | no |
| Slamf7       | 58.31  | 40.94 | -0.51      | 8.69E-02 | no |
| Prg3         | 3.11   | 0.07  | -5.48      | 8.69E-02 | no |
| Dopey2       | 4.03   | 6.40  | 0.67       | 8.70E-02 | no |
| AW112010     | 13.07  | 24.50 | 0.91       | 8.78E-02 | no |
| Nup205       | 42.59  | 30.03 | -0.50      | 8.78E-02 | no |
| Scarf1       | 0.82   | 0.28  | -1.56      | 8.78E-02 | no |
| Cenpk        | 19.45  | 11.19 | -0.80      | 8.80E-02 | no |

|              |        |       |           |          |    |
|--------------|--------|-------|-----------|----------|----|
| Zan          | 0.34   | 0.71  | 1.07      | 8.87E-02 | no |
| Fam105a      | 4.62   | 9.01  | 0.96      | 8.87E-02 | no |
| Kdsr         | 5.44   | 8.79  | 0.69      | 8.88E-02 | no |
| Pold3        | 39.08  | 27.04 | -0.53     | 8.88E-02 | no |
| 9930012K11Ri | 2.65   | 5.42  | 1.03      | 8.89E-02 | no |
| A830007P12Ri | 14.78  | 22.04 | 0.58      | 8.89E-02 | no |
| Kpnb1        | 81.20  | 56.91 | -0.51     | 8.89E-02 | no |
| Atxn1        | 0.85   | 1.83  | 1.11      | 8.91E-02 | no |
| Kcnb1        | 1.02   | 2.14  | 1.07      | 8.91E-02 | no |
| Vdac3        | 72.39  | 50.34 | -0.52     | 8.93E-02 | no |
| Sass6        | 17.36  | 11.46 | -0.60     | 8.93E-02 | no |
| Lhfp         | 0.83   | 0.23  | -1.85     | 8.96E-02 | no |
| Gca          | 0.91   | 2.16  | 1.24      | 8.99E-02 | no |
| Syvn1        | 93.68  | 72.11 | -0.38     | 8.99E-02 | no |
| Oip5         | 21.04  | 12.25 | -0.78     | 8.99E-02 | no |
| Fbxl20       | 8.19   | 12.04 | 0.56      | 9.00E-02 | no |
| Abcd4        | 4.24   | 7.70  | 0.86      | 9.01E-02 | no |
| Nmral1       | 42.81  | 27.57 | -0.63     | 9.04E-02 | no |
| Gltscr1      | 38.56  | 27.16 | -0.51     | 9.05E-02 | no |
| Zranb3       | 11.18  | 7.06  | -0.66     | 9.05E-02 | no |
| Nfya         | 57.99  | 42.96 | -0.43     | 9.08E-02 | no |
| Ddx58        | 9.76   | 14.80 | 0.60      | 9.10E-02 | no |
| Map3k14      | 7.47   | 11.53 | 0.63      | 9.11E-02 | no |
| Gm5088       | 18.55  | 12.09 | -0.62     | 9.13E-02 | no |
| Pydc3        | 4.83   | 2.50  | -0.95     | 9.15E-02 | no |
| Tmem35       | 0.28   | 0.00  | -1.79769e | 9.25E-02 | no |
| Spib         | 115.17 | 81.29 | -0.50     | 9.30E-02 | no |
| Ankrd24      | 0.42   | 1.01  | 1.26      | 9.31E-02 | no |
| Rnf168       | 21.14  | 14.42 | -0.55     | 9.33E-02 | no |
| Capn1        | 14.94  | 21.66 | 0.54      | 9.35E-02 | no |
| Ren1         | 0.32   | 0.00  | -1.79769e | 9.35E-02 | no |
| Kcnk6        | 2.45   | 4.54  | 0.89      | 9.36E-02 | no |
| Sat1         | 25.08  | 40.21 | 0.68      | 9.36E-02 | no |
| 5031439G07Ri | 27.36  | 19.14 | -0.52     | 9.36E-02 | no |
| 5830418K08Ri | 20.17  | 14.10 | -0.52     | 9.36E-02 | no |
| Pitpm1       | 17.71  | 12.23 | -0.53     | 9.36E-02 | no |
| 2210404O07Ri | 9.77   | 19.38 | 0.99      | 9.36E-02 | no |
| Scn4a        | 2.56   | 4.35  | 0.76      | 9.36E-02 | no |
| Obfc2a       | 9.58   | 15.68 | 0.71      | 9.36E-02 | no |
| Itgax        | 0.17   | 0.51  | 1.63      | 9.36E-02 | no |
| 6720463M24R  | 28.38  | 18.73 | -0.60     | 9.39E-02 | no |
| Wrnip1       | 23.09  | 33.75 | 0.55      | 9.41E-02 | no |

|              |        |        |           |          |    |
|--------------|--------|--------|-----------|----------|----|
| Clec2h       | 0.12   | 0.76   | 2.68      | 9.41E-02 | no |
| E2f3         | 19.25  | 13.19  | -0.55     | 9.42E-02 | no |
| Abhd14b      | 3.92   | 7.98   | 1.02      | 9.46E-02 | no |
| Dtnbp1       | 19.62  | 30.76  | 0.65      | 9.47E-02 | no |
| Zfp286       | 2.72   | 5.18   | 0.93      | 9.52E-02 | no |
| Tacc3        | 42.82  | 29.66  | -0.53     | 9.52E-02 | no |
| Ccnb2        | 63.85  | 44.05  | -0.54     | 9.53E-02 | no |
| 4933404O12Ri | 7.52   | 4.43   | -0.76     | 9.56E-02 | no |
| Ntn1         | 0.77   | 1.64   | 1.09      | 9.58E-02 | no |
| Elf4         | 34.83  | 49.39  | 0.50      | 9.60E-02 | no |
| Zfp820       | 2.65   | 5.06   | 0.93      | 9.60E-02 | no |
| Zfyve1       | 13.04  | 19.41  | 0.57      | 9.67E-02 | no |
| Cyp4v3       | 1.60   | 3.38   | 1.08      | 9.71E-02 | no |
| Zbtb10       | 3.94   | 2.28   | -0.79     | 9.76E-02 | no |
| Pbxip1       | 27.45  | 39.17  | 0.51      | 9.83E-02 | no |
| Cd7          | 0.28   | 1.45   | 2.36      | 9.87E-02 | no |
| Dbp          | 3.83   | 7.38   | 0.95      | 9.87E-02 | no |
| Tceal1       | 0.71   | 2.32   | 1.70      | 9.90E-02 | no |
| Nudt4        | 42.89  | 29.91  | -0.52     | 9.90E-02 | no |
| Sstr2        | 0.71   | 2.28   | 1.68      | 9.97E-02 | no |
| Emcn         | 0.00   | 0.35   | 1.79769e+ | 1.00E-01 | no |
| Crhbp        | 1.90   | 4.19   | 1.14      | 1.00E-01 | no |
| Pon3         | 5.59   | 10.50  | 0.91      | 1.00E-01 | no |
| Serpina3h    | 0.05   | 0.71   | 3.76      | 1.00E-01 | no |
| Slc26a1      | 0.63   | 1.48   | 1.23      | 1.00E-01 | no |
| Fam65b       | 29.84  | 39.90  | 0.42      | 1.00E-01 | no |
| Snx5         | 88.01  | 114.98 | 0.39      | 1.00E-01 | no |
| Pfn1         | 275.39 | 195.76 | -0.49     | 1.00E-01 | no |
| Phc1         | 21.99  | 15.65  | -0.49     | 1.01E-01 | no |
| Ephb6        | 0.92   | 2.00   | 1.11      | 1.01E-01 | no |
| Armcx2       | 7.37   | 11.26  | 0.61      | 1.01E-01 | no |
| Nagk         | 6.53   | 11.90  | 0.87      | 1.01E-01 | no |
| Asrgl1       | 22.63  | 14.68  | -0.62     | 1.01E-01 | no |
| Kdm5d        | 3.11   | 5.29   | 0.77      | 1.02E-01 | no |
| Plekhg3      | 13.26  | 8.92   | -0.57     | 1.02E-01 | no |
| Nkrf         | 12.30  | 7.57   | -0.70     | 1.02E-01 | no |
| Havcr2       | 0.11   | 0.54   | 2.35      | 1.02E-01 | no |
| Tipin        | 47.11  | 30.78  | -0.61     | 1.02E-01 | no |
| 4933437F05Ri | 0.40   | 1.32   | 1.71      | 1.03E-01 | no |
| Fes          | 5.39   | 9.10   | 0.76      | 1.03E-01 | no |
| Wee1         | 34.22  | 23.81  | -0.52     | 1.03E-01 | no |
| Dars2        | 16.22  | 10.62  | -0.61     | 1.03E-01 | no |

|               |       |       |           |          |    |
|---------------|-------|-------|-----------|----------|----|
| Gpr55         | 0.07  | 0.61  | 3.12      | 1.03E-01 | no |
| Ethe1         | 18.48 | 29.12 | 0.66      | 1.03E-01 | no |
| Lpcat2        | 3.79  | 7.07  | 0.90      | 1.03E-01 | no |
| Cenpc1        | 25.28 | 17.13 | -0.56     | 1.04E-01 | no |
| Kctd17        | 2.44  | 5.20  | 1.09      | 1.04E-01 | no |
| Ephx1         | 8.96  | 15.33 | 0.77      | 1.04E-01 | no |
| Ampd3         | 4.06  | 6.85  | 0.76      | 1.04E-01 | no |
| Il3ra         | 10.24 | 17.42 | 0.77      | 1.04E-01 | no |
| Paxip1        | 28.16 | 19.83 | -0.51     | 1.04E-01 | no |
| Gm4975        | 0.75  | 0.28  | -1.42     | 1.04E-01 | no |
| Tagap1        | 33.88 | 48.55 | 0.52      | 1.04E-01 | no |
| 4632434I11Rik | 9.72  | 5.80  | -0.74     | 1.04E-01 | no |
| Bco2          | 0.69  | 0.18  | -1.96     | 1.05E-01 | no |
| 2610002D18Ri  | 15.20 | 8.51  | -0.84     | 1.06E-01 | no |
| Mst1r         | 0.41  | 0.14  | -1.54     | 1.07E-01 | no |
| Fam72a        | 8.60  | 4.66  | -0.88     | 1.07E-01 | no |
| Ap1s2         | 8.32  | 4.64  | -0.84     | 1.07E-01 | no |
| Tuba1c        | 14.21 | 8.41  | -0.76     | 1.07E-01 | no |
| Mical3        | 4.91  | 2.63  | -0.90     | 1.07E-01 | no |
| Snx8          | 18.57 | 27.30 | 0.56      | 1.07E-01 | no |
| Hist1h1e      | 3.13  | 1.24  | -1.33     | 1.08E-01 | no |
| Grik5         | 2.88  | 5.10  | 0.82      | 1.08E-01 | no |
| BC055324      | 18.95 | 12.25 | -0.63     | 1.08E-01 | no |
| Agpat3        | 14.87 | 21.89 | 0.56      | 1.08E-01 | no |
| Rbbp7         | 84.57 | 60.14 | -0.49     | 1.08E-01 | no |
| Tnfrsf19      | 37.83 | 27.92 | -0.44     | 1.09E-01 | no |
| Eme2          | 6.49  | 11.60 | 0.84      | 1.09E-01 | no |
| Avl9          | 11.20 | 16.23 | 0.54      | 1.09E-01 | no |
| Scn11a        | 0.28  | 0.07  | -1.97     | 1.09E-01 | no |
| Rab30         | 0.75  | 0.06  | -3.62     | 1.09E-01 | no |
| Tom1l2        | 9.48  | 13.44 | 0.50      | 1.10E-01 | no |
| Thns12        | 0.00  | 0.37  | 1.79769e+ | 1.10E-01 | no |
| Swap70        | 26.14 | 18.23 | -0.52     | 1.11E-01 | no |
| Ccbp2         | 0.56  | 0.13  | -2.05     | 1.11E-01 | no |
| Cks1b         | 71.68 | 47.12 | -0.61     | 1.11E-01 | no |
| Ceacam9       | 0.09  | 0.91  | 3.41      | 1.11E-01 | no |
| Cenpj         | 13.40 | 8.90  | -0.59     | 1.11E-01 | no |
| Arid5b        | 4.52  | 2.57  | -0.81     | 1.11E-01 | no |
| Vwf           | 0.02  | 0.16  | 3.13      | 1.11E-01 | no |
| Akap12        | 57.29 | 82.11 | 0.52      | 1.11E-01 | no |
| Zfp296        | 6.68  | 3.41  | -0.97     | 1.11E-01 | no |
| Ric3          | 0.25  | 0.67  | 1.41      | 1.12E-01 | no |

|              |       |        |           |          |    |
|--------------|-------|--------|-----------|----------|----|
| Ptk2         | 0.95  | 0.37   | -1.38     | 1.12E-01 | no |
| C130039O16R  | 10.28 | 14.11  | 0.46      | 1.12E-01 | no |
| Mfsd1        | 18.90 | 27.86  | 0.56      | 1.14E-01 | no |
| Pygl         | 2.59  | 4.93   | 0.93      | 1.14E-01 | no |
| Dgkh         | 0.14  | 0.46   | 1.70      | 1.15E-01 | no |
| Ribc2        | 0.00  | 0.24   | 1.79769e+ | 1.15E-01 | no |
| Angptl2      | 2.12  | 3.97   | 0.90      | 1.15E-01 | no |
| Usp49        | 11.50 | 7.72   | -0.57     | 1.15E-01 | no |
| Slc2a8       | 6.11  | 3.23   | -0.92     | 1.15E-01 | no |
| Pa2g4        | 76.02 | 54.32  | -0.48     | 1.16E-01 | no |
| Car3         | 4.95  | 2.38   | -1.06     | 1.16E-01 | no |
| Robo3        | 0.47  | 1.09   | 1.22      | 1.16E-01 | no |
| Ipo5         | 60.87 | 43.69  | -0.48     | 1.17E-01 | no |
| Foxo3        | 10.02 | 15.36  | 0.62      | 1.17E-01 | no |
| Trim30d      | 10.99 | 16.50  | 0.59      | 1.17E-01 | no |
| Gucy2g       | 0.02  | 0.51   | 4.50      | 1.17E-01 | no |
| Dbn1         | 0.00  | 0.12   | 1.79769e+ | 1.18E-01 | no |
| Jmy          | 5.50  | 8.63   | 0.65      | 1.18E-01 | no |
| Serpina3i    | 0.14  | 0.58   | 2.08      | 1.18E-01 | no |
| Ak1          | 0.00  | 0.19   | 1.79769e+ | 1.18E-01 | no |
| Phactr4      | 18.99 | 13.59  | -0.48     | 1.19E-01 | no |
| Tmem100      | 0.00  | 0.24   | 1.79769e+ | 1.19E-01 | no |
| Serpinh1     | 0.00  | 0.31   | 1.79769e+ | 1.19E-01 | no |
| Atp2a1       | 0.71  | 1.57   | 1.14      | 1.19E-01 | no |
| Mdc1         | 25.82 | 18.49  | -0.48     | 1.19E-01 | no |
| Pydc4        | 4.24  | 2.09   | -1.03     | 1.19E-01 | no |
| Basp1        | 0.91  | 0.29   | -1.66     | 1.20E-01 | no |
| Ntn3         | 0.00  | 0.08   | 1.79769e+ | 1.20E-01 | no |
| Ccr12        | 0.81  | 1.97   | 1.28      | 1.20E-01 | no |
| 2010317E24Ri | 27.40 | 19.01  | -0.53     | 1.20E-01 | no |
| Plau         | 0.60  | 0.14   | -2.07     | 1.20E-01 | no |
| Oplah        | 0.48  | 1.10   | 1.21      | 1.20E-01 | no |
| Ppp1r13b     | 4.49  | 7.25   | 0.69      | 1.20E-01 | no |
| Unc13d       | 10.54 | 15.58  | 0.56      | 1.20E-01 | no |
| Unc93b1      | 94.66 | 131.31 | 0.47      | 1.20E-01 | no |
| Klc4         | 6.96  | 11.42  | 0.71      | 1.21E-01 | no |
| 9430020K01Ri | 1.83  | 3.18   | 0.80      | 1.21E-01 | no |
| Rpa2         | 42.66 | 29.33  | -0.54     | 1.21E-01 | no |
| Ppic         | 2.14  | 4.64   | 1.11      | 1.21E-01 | no |
| Acsbg1       | 0.06  | 0.41   | 2.86      | 1.21E-01 | no |
| Arhgap9      | 15.80 | 24.31  | 0.62      | 1.21E-01 | no |
| Mr1          | 5.55  | 9.57   | 0.79      | 1.21E-01 | no |

|          |        |       |           |          |    |
|----------|--------|-------|-----------|----------|----|
| H1f0     | 30.66  | 44.04 | 0.52      | 1.21E-01 | no |
| Arl11    | 4.93   | 9.37  | 0.93      | 1.22E-01 | no |
| D0H4S114 | 0.00   | 0.21  | 1.79769e+ | 1.22E-01 | no |
| Hdgfl1   | 0.00   | 0.17  | 1.79769e+ | 1.22E-01 | no |
| Supt16h  | 72.85  | 52.33 | -0.48     | 1.22E-01 | no |
| Npm3-ps1 | 38.69  | 24.35 | -0.67     | 1.23E-01 | no |
| Lpar1    | 0.37   | 1.04  | 1.49      | 1.24E-01 | no |
| Zfp202   | 1.19   | 2.39  | 1.00      | 1.24E-01 | no |
| Cbfb     | 83.66  | 63.87 | -0.39     | 1.24E-01 | no |
| Tmem86a  | 3.21   | 6.23  | 0.96      | 1.25E-01 | no |
| Sf1      | 87.66  | 67.15 | -0.38     | 1.25E-01 | no |
| Gdi1     | 61.16  | 43.70 | -0.48     | 1.25E-01 | no |
| Satb2    | 0.58   | 0.23  | -1.35     | 1.25E-01 | no |
| Entpd4   | 7.15   | 11.39 | 0.67      | 1.25E-01 | no |
| Thra     | 12.44  | 19.16 | 0.62      | 1.25E-01 | no |
| Zfp937   | 0.77   | 1.54  | 1.00      | 1.25E-01 | no |
| Nup85    | 37.03  | 25.58 | -0.53     | 1.26E-01 | no |
| Clec2g   | 0.51   | 1.35  | 1.40      | 1.26E-01 | no |
| Capsl    | 12.05  | 21.12 | 0.81      | 1.26E-01 | no |
| Qk       | 49.68  | 37.83 | -0.39     | 1.26E-01 | no |
| Zfp167   | 1.26   | 2.69  | 1.10      | 1.26E-01 | no |
| Pfas     | 23.90  | 17.11 | -0.48     | 1.27E-01 | no |
| Dbf4     | 38.77  | 27.90 | -0.47     | 1.27E-01 | no |
| Klhdc8b  | 3.50   | 6.17  | 0.82      | 1.27E-01 | no |
| Trim34a  | 15.06  | 22.72 | 0.59      | 1.27E-01 | no |
| Pkn1     | 40.06  | 52.20 | 0.38      | 1.27E-01 | no |
| Gm10818  | 1.05   | 0.26  | -1.99     | 1.27E-01 | no |
| Ssfa2    | 6.26   | 9.52  | 0.60      | 1.28E-01 | no |
| ORF19    | 16.22  | 22.95 | 0.50      | 1.28E-01 | no |
| Elof1    | 78.10  | 54.28 | -0.53     | 1.28E-01 | no |
| Selplg   | 32.95  | 46.58 | 0.50      | 1.28E-01 | no |
| Tnfrsf1b | 8.28   | 12.37 | 0.58      | 1.28E-01 | no |
| Rfc4     | 37.35  | 24.03 | -0.64     | 1.28E-01 | no |
| Hist1h1b | 5.25   | 2.27  | -1.21     | 1.28E-01 | no |
| Abcc10   | 2.08   | 3.66  | 0.82      | 1.28E-01 | no |
| Pgm2l1   | 18.61  | 13.26 | -0.49     | 1.28E-01 | no |
| Pnp2     | 32.99  | 49.41 | 0.58      | 1.29E-01 | no |
| Set      | 118.30 | 85.25 | -0.47     | 1.29E-01 | no |
| Plekhb2  | 11.62  | 17.53 | 0.59      | 1.29E-01 | no |
| Ptger1   | 28.07  | 40.41 | 0.53      | 1.29E-01 | no |
| Prkcc    | 1.10   | 0.44  | -1.31     | 1.29E-01 | no |
| Ubtf     | 43.14  | 33.28 | -0.37     | 1.30E-01 | no |

|              |        |        |       |          |    |
|--------------|--------|--------|-------|----------|----|
| E130012A19Ri | 4.28   | 2.24   | -0.93 | 1.30E-01 | no |
| Ube2n        | 27.86  | 19.44  | -0.52 | 1.30E-01 | no |
| Ly6c1        | 2.58   | 6.04   | 1.22  | 1.31E-01 | no |
| BC030867     | 12.68  | 7.89   | -0.68 | 1.32E-01 | no |
| Orc1         | 9.41   | 5.70   | -0.72 | 1.32E-01 | no |
| Gm6531       | 3.98   | 2.00   | -0.99 | 1.33E-01 | no |
| Usp44        | 1.28   | 0.54   | -1.24 | 1.33E-01 | no |
| Igsf8        | 29.67  | 20.37  | -0.54 | 1.33E-01 | no |
| Cyp39a1      | 2.68   | 1.31   | -1.03 | 1.34E-01 | no |
| Hmgb3        | 21.48  | 13.42  | -0.68 | 1.34E-01 | no |
| 4930534B04Ri | 15.24  | 10.54  | -0.53 | 1.34E-01 | no |
| Pgk1         | 150.94 | 109.38 | -0.46 | 1.34E-01 | no |
| Dvl2         | 15.24  | 22.30  | 0.55  | 1.35E-01 | no |
| Tjp2         | 5.40   | 3.33   | -0.70 | 1.35E-01 | no |
| Tnf          | 0.82   | 2.08   | 1.33  | 1.35E-01 | no |
| Sun2         | 51.96  | 72.11  | 0.47  | 1.35E-01 | no |
| Dusp9        | 0.29   | 0.78   | 1.45  | 1.36E-01 | no |
| Slc20a1      | 42.12  | 31.23  | -0.43 | 1.36E-01 | no |
| 4930426L09Ri | 0.27   | 0.99   | 1.88  | 1.36E-01 | no |
| Srd5a3       | 8.45   | 14.36  | 0.76  | 1.36E-01 | no |
| Top1         | 50.64  | 36.56  | -0.47 | 1.36E-01 | no |
| Gnptab       | 27.07  | 19.35  | -0.48 | 1.36E-01 | no |
| Taf9         | 113.88 | 87.49  | -0.38 | 1.36E-01 | no |
| Ybx1         | 173.52 | 125.50 | -0.47 | 1.36E-01 | no |
| Mbnl3        | 27.36  | 19.75  | -0.47 | 1.37E-01 | no |
| Ncf4         | 12.62  | 20.14  | 0.67  | 1.37E-01 | no |
| Gp49a        | 0.36   | 1.21   | 1.75  | 1.37E-01 | no |
| Igfbp4       | 28.92  | 19.54  | -0.57 | 1.38E-01 | no |
| Erp29        | 59.94  | 41.78  | -0.52 | 1.38E-01 | no |
| Crebl2       | 3.81   | 6.85   | 0.85  | 1.38E-01 | no |
| Ier5l        | 1.80   | 0.72   | -1.32 | 1.39E-01 | no |
| Nfyb         | 32.15  | 22.06  | -0.54 | 1.39E-01 | no |
| Parp4        | 11.31  | 16.10  | 0.51  | 1.40E-01 | no |
| Arfgap3      | 4.25   | 7.32   | 0.78  | 1.40E-01 | no |
| 2700081O15Ri | 18.06  | 12.67  | -0.51 | 1.40E-01 | no |
| Chek2        | 14.59  | 9.05   | -0.69 | 1.41E-01 | no |
| Flt3         | 1.69   | 3.45   | 1.03  | 1.42E-01 | no |
| Tapbpl       | 11.08  | 17.21  | 0.63  | 1.42E-01 | no |
| Gbp9         | 14.65  | 21.36  | 0.54  | 1.44E-01 | no |
| Hn1l         | 34.75  | 24.36  | -0.51 | 1.44E-01 | no |
| Zfand1       | 8.53   | 14.62  | 0.78  | 1.46E-01 | no |
| Il16         | 32.58  | 45.17  | 0.47  | 1.46E-01 | no |



|              |        |        |           |          |    |
|--------------|--------|--------|-----------|----------|----|
| Ssh3         | 13.86  | 20.40  | 0.56      | 1.47E-01 | no |
| Eif2s3x      | 119.17 | 86.43  | -0.46     | 1.48E-01 | no |
| Alox5ap      | 11.58  | 20.66  | 0.84      | 1.48E-01 | no |
| Pex1         | 7.14   | 10.78  | 0.59      | 1.48E-01 | no |
| Fbxl5        | 38.03  | 27.43  | -0.47     | 1.48E-01 | no |
| Hist1h1c     | 8.58   | 4.71   | -0.86     | 1.48E-01 | no |
| Phf17        | 21.14  | 16.12  | -0.39     | 1.48E-01 | no |
| Edaradd      | 11.73  | 17.87  | 0.61      | 1.48E-01 | no |
| Ppp1r3b      | 1.61   | 3.04   | 0.91      | 1.48E-01 | no |
| Tbc1d9b      | 14.92  | 20.92  | 0.49      | 1.48E-01 | no |
| Setd8        | 49.44  | 35.61  | -0.47     | 1.48E-01 | no |
| Phf6         | 32.85  | 23.52  | -0.48     | 1.48E-01 | no |
| Lfng         | 20.85  | 30.26  | 0.54      | 1.50E-01 | no |
| Paics        | 71.08  | 51.51  | -0.46     | 1.50E-01 | no |
| Eml6         | 0.19   | 0.45   | 1.22      | 1.50E-01 | no |
| Lmnb2        | 34.40  | 24.71  | -0.48     | 1.50E-01 | no |
| Clic5        | 3.13   | 5.10   | 0.71      | 1.50E-01 | no |
| Pdzd2        | 0.61   | 1.11   | 0.86      | 1.50E-01 | no |
| Anxa11       | 29.72  | 41.88  | 0.49      | 1.50E-01 | no |
| Nedd9        | 58.64  | 45.57  | -0.36     | 1.50E-01 | no |
| Zbtb45       | 14.77  | 9.25   | -0.68     | 1.50E-01 | no |
| Irf7         | 7.15   | 11.99  | 0.75      | 1.50E-01 | no |
| Rsph9        | 25.80  | 15.53  | -0.73     | 1.50E-01 | no |
| Gm12185      | 1.04   | 2.03   | 0.96      | 1.51E-01 | no |
| Hivep3       | 8.37   | 11.69  | 0.48      | 1.51E-01 | no |
| Gm6525       | 11.21  | 5.41   | -1.05     | 1.51E-01 | no |
| Fam101a      | 0.67   | 0.12   | -2.49     | 1.51E-01 | no |
| Prkag3       | 0.13   | 0.00   | -1.79769e | 1.52E-01 | no |
| Trp53inp2    | 7.72   | 4.75   | -0.70     | 1.52E-01 | no |
| Usp1         | 77.38  | 56.35  | -0.46     | 1.52E-01 | no |
| Litaf        | 28.56  | 19.38  | -0.56     | 1.52E-01 | no |
| Tesk1        | 14.07  | 9.47   | -0.57     | 1.53E-01 | no |
| Med14        | 33.52  | 25.29  | -0.41     | 1.53E-01 | no |
| Atad1        | 46.19  | 33.03  | -0.48     | 1.54E-01 | no |
| Tlr7         | 1.55   | 3.14   | 1.02      | 1.54E-01 | no |
| Stip1        | 63.11  | 45.73  | -0.46     | 1.54E-01 | no |
| Chka         | 20.10  | 27.80  | 0.47      | 1.55E-01 | no |
| Acaca        | 14.35  | 10.33  | -0.47     | 1.55E-01 | no |
| 2700046G09Ri | 0.65   | 1.63   | 1.33      | 1.55E-01 | no |
| Oaz1         | 170.44 | 124.12 | -0.46     | 1.56E-01 | no |
| Peg10        | 0.40   | 0.15   | -1.40     | 1.56E-01 | no |
| Atad2        | 49.58  | 36.19  | -0.45     | 1.56E-01 | no |

|            |        |        |           |          |    |
|------------|--------|--------|-----------|----------|----|
| Fam55c     | 15.48  | 22.15  | 0.52      | 1.56E-01 | no |
| Cysltr2    | 0.55   | 1.85   | 1.75      | 1.56E-01 | no |
| Rgs1       | 0.43   | 1.30   | 1.61      | 1.56E-01 | no |
| Mxd3       | 32.48  | 21.55  | -0.59     | 1.57E-01 | no |
| Aph1c      | 0.52   | 1.14   | 1.14      | 1.57E-01 | no |
| Leprotl1   | 11.75  | 18.24  | 0.63      | 1.57E-01 | no |
| Gmn        | 46.02  | 30.57  | -0.59     | 1.57E-01 | no |
| Ddx3y      | 5.39   | 8.56   | 0.67      | 1.58E-01 | no |
| Foxj2      | 4.08   | 6.44   | 0.66      | 1.58E-01 | no |
| Pwwp2b     | 3.18   | 5.58   | 0.81      | 1.59E-01 | no |
| Rbmx       | 67.16  | 52.32  | -0.36     | 1.59E-01 | no |
| Car5b      | 0.12   | 0.44   | 1.83      | 1.59E-01 | no |
| Lsm2       | 56.35  | 38.26  | -0.56     | 1.59E-01 | no |
| C1qtnf5    | 0.40   | 0.00   | -1.79769e | 1.59E-01 | no |
| Myo6       | 0.38   | 0.81   | 1.08      | 1.59E-01 | no |
| Dak        | 7.80   | 12.52  | 0.68      | 1.59E-01 | no |
| Rfx3       | 7.10   | 4.87   | -0.54     | 1.59E-01 | no |
| Asah2      | 4.63   | 7.42   | 0.68      | 1.60E-01 | no |
| Rpl14      | 242.64 | 177.65 | -0.45     | 1.60E-01 | no |
| Qrs1       | 19.49  | 12.62  | -0.63     | 1.61E-01 | no |
| Fam84b     | 3.89   | 6.17   | 0.66      | 1.61E-01 | no |
| Ehbp1l1    | 29.56  | 23.03  | -0.36     | 1.61E-01 | no |
| Fancm      | 11.67  | 8.25   | -0.50     | 1.62E-01 | no |
| Slc37a3    | 4.26   | 2.41   | -0.82     | 1.62E-01 | no |
| Adk        | 19.20  | 12.03  | -0.67     | 1.62E-01 | no |
| Tesk2      | 6.86   | 4.06   | -0.76     | 1.62E-01 | no |
| Arhgef11   | 6.37   | 4.13   | -0.62     | 1.62E-01 | no |
| Fat1       | 0.02   | 0.00   | -1.79769e | 1.62E-01 | no |
| Fgfr4      | 0.11   | 0.00   | -1.79769e | 1.62E-01 | no |
| Ppbb       | 0.44   | 0.00   | -1.79769e | 1.62E-01 | no |
| Plekhg2    | 27.89  | 21.31  | -0.39     | 1.62E-01 | no |
| Tnfrsf14   | 11.75  | 20.12  | 0.78      | 1.63E-01 | no |
| Abcc4      | 1.94   | 3.27   | 0.76      | 1.63E-01 | no |
| Bcas3      | 6.33   | 9.78   | 0.63      | 1.63E-01 | no |
| Neb        | 0.14   | 0.28   | 1.03      | 1.64E-01 | no |
| Tubb2a-ps2 | 6.08   | 11.95  | 0.97      | 1.64E-01 | no |
| Fbxw4      | 4.07   | 7.22   | 0.83      | 1.64E-01 | no |
| Nipal3     | 8.81   | 12.73  | 0.53      | 1.64E-01 | no |
| Nudc       | 87.52  | 63.52  | -0.46     | 1.64E-01 | no |
| Lrrc16a    | 1.80   | 0.94   | -0.93     | 1.64E-01 | no |
| Pabpc1     | 296.84 | 211.79 | -0.49     | 1.64E-01 | no |
| Cd200r1    | 0.21   | 0.84   | 1.99      | 1.65E-01 | no |

|               |       |       |           |          |    |
|---------------|-------|-------|-----------|----------|----|
| Scn8a         | 0.04  | 0.00  | -1.79769e | 1.65E-01 | no |
| 2010011120Rik | 2.35  | 4.28  | 0.87      | 1.65E-01 | no |
| Gstt3         | 4.02  | 7.28  | 0.86      | 1.65E-01 | no |
| Kctd3         | 15.19 | 10.39 | -0.55     | 1.65E-01 | no |
| Ncf1          | 4.99  | 2.73  | -0.87     | 1.65E-01 | no |
| Hspa4         | 53.87 | 39.55 | -0.45     | 1.65E-01 | no |
| Cbx7          | 12.49 | 18.33 | 0.55      | 1.66E-01 | no |
| Xpo1          | 71.65 | 53.00 | -0.43     | 1.66E-01 | no |
| Tead2         | 1.14  | 2.39  | 1.07      | 1.66E-01 | no |
| Gm11110       | 0.97  | 2.54  | 1.38      | 1.66E-01 | no |
| Rad21         | 97.20 | 71.27 | -0.45     | 1.66E-01 | no |
| Gfra1         | 42.52 | 30.62 | -0.47     | 1.66E-01 | no |
| H2-T9         | 4.71  | 8.37  | 0.83      | 1.66E-01 | no |
| Rnf123        | 14.62 | 20.51 | 0.49      | 1.66E-01 | no |
| Hspb6         | 6.65  | 3.46  | -0.94     | 1.66E-01 | no |
| Etnk2         | 0.45  | 0.08  | -2.57     | 1.66E-01 | no |
| Fam63b        | 24.87 | 34.07 | 0.45      | 1.67E-01 | no |
| 2610021K21Ri  | 5.48  | 2.95  | -0.89     | 1.67E-01 | no |
| Zfp575        | 0.93  | 1.97  | 1.08      | 1.67E-01 | no |
| Samd1         | 33.48 | 23.51 | -0.51     | 1.68E-01 | no |
| Odc1          | 15.31 | 9.95  | -0.62     | 1.68E-01 | no |
| Gm71          | 10.12 | 5.43  | -0.90     | 1.68E-01 | no |
| Gpr137c       | 0.76  | 0.27  | -1.50     | 1.69E-01 | no |
| Creb5         | 0.00  | 0.14  | 1.79769e+ | 1.69E-01 | no |
| Enah          | 0.00  | 0.10  | 1.79769e+ | 1.69E-01 | no |
| Grm8          | 0.00  | 0.11  | 1.79769e+ | 1.69E-01 | no |
| Pdzd3         | 0.00  | 0.14  | 1.79769e+ | 1.69E-01 | no |
| Ddit3         | 10.50 | 17.99 | 0.78      | 1.69E-01 | no |
| Sin3a         | 41.26 | 32.71 | -0.34     | 1.69E-01 | no |
| Lyar          | 36.48 | 25.23 | -0.53     | 1.69E-01 | no |
| Slc12a8       | 0.00  | 0.12  | 1.79769e+ | 1.70E-01 | no |
| Nrxn2         | 0.46  | 0.98  | 1.08      | 1.70E-01 | no |
| Alpk1         | 5.20  | 7.96  | 0.62      | 1.70E-01 | no |
| Tgfbr2        | 26.05 | 33.73 | 0.37      | 1.70E-01 | no |
| Mif4gd        | 16.72 | 10.43 | -0.68     | 1.70E-01 | no |
| Mcm2          | 74.13 | 54.59 | -0.44     | 1.70E-01 | no |
| Rfc5          | 36.61 | 25.38 | -0.53     | 1.70E-01 | no |
| Tmem2         | 4.22  | 2.66  | -0.67     | 1.70E-01 | no |
| Dhtkd1        | 0.20  | 0.55  | 1.49      | 1.70E-01 | no |
| 5830411N06Ri  | 0.00  | 0.12  | 1.79769e+ | 1.70E-01 | no |
| Actn2         | 0.00  | 0.11  | 1.79769e+ | 1.70E-01 | no |
| Gimap9        | 23.46 | 35.35 | 0.59      | 1.71E-01 | no |

|              |       |       |           |          |    |
|--------------|-------|-------|-----------|----------|----|
| Gins2        | 33.83 | 22.00 | -0.62     | 1.71E-01 | no |
| Hmgn5        | 37.52 | 26.58 | -0.50     | 1.71E-01 | no |
| Grhl2        | 0.00  | 0.07  | 1.79769e+ | 1.71E-01 | no |
| Neurl1a      | 0.00  | 0.09  | 1.79769e+ | 1.71E-01 | no |
| Gramd1c      | 1.70  | 3.25  | 0.93      | 1.71E-01 | no |
| Gpr97        | 14.50 | 21.53 | 0.57      | 1.71E-01 | no |
| Ticam2       | 6.64  | 10.46 | 0.66      | 1.71E-01 | no |
| Blnk         | 72.00 | 99.05 | 0.46      | 1.71E-01 | no |
| Zdhhc1       | 3.31  | 6.00  | 0.86      | 1.72E-01 | no |
| Pnp          | 38.75 | 53.61 | 0.47      | 1.72E-01 | no |
| Hdac7        | 53.98 | 73.95 | 0.45      | 1.72E-01 | no |
| Nup50        | 41.04 | 30.12 | -0.45     | 1.73E-01 | no |
| Fpgt         | 3.84  | 6.56  | 0.77      | 1.73E-01 | no |
| Lbr          | 91.46 | 67.27 | -0.44     | 1.73E-01 | no |
| Pld2         | 0.96  | 1.92  | 1.01      | 1.73E-01 | no |
| Gbp11        | 0.39  | 0.99  | 1.33      | 1.73E-01 | no |
| Prssl1       | 1.78  | 3.37  | 0.92      | 1.73E-01 | no |
| Aldh6a1      | 3.81  | 6.44  | 0.76      | 1.73E-01 | no |
| Acsl3        | 6.02  | 3.58  | -0.75     | 1.73E-01 | no |
| Gclm         | 11.48 | 6.66  | -0.78     | 1.73E-01 | no |
| Zfp94        | 5.22  | 8.45  | 0.70      | 1.74E-01 | no |
| Anks1        | 23.28 | 32.19 | 0.47      | 1.74E-01 | no |
| Tctn1        | 10.36 | 6.16  | -0.75     | 1.74E-01 | no |
| Scd2         | 40.78 | 29.95 | -0.45     | 1.74E-01 | no |
| Tmem108      | 14.07 | 19.96 | 0.50      | 1.74E-01 | no |
| Meox1        | 1.55  | 3.09  | 0.99      | 1.75E-01 | no |
| 2210016F16Ri | 6.47  | 3.77  | -0.78     | 1.75E-01 | no |
| Mfsd4        | 18.53 | 25.76 | 0.48      | 1.75E-01 | no |
| Mcam         | 0.03  | 0.69  | 4.73      | 1.76E-01 | no |
| Mmp8         | 0.34  | 0.94  | 1.45      | 1.76E-01 | no |
| Sp3          | 55.76 | 43.51 | -0.36     | 1.76E-01 | no |
| Gpr137b      | 2.85  | 5.12  | 0.84      | 1.76E-01 | no |
| Card11       | 8.09  | 5.29  | -0.61     | 1.76E-01 | no |
| Sgk3         | 5.56  | 8.29  | 0.58      | 1.77E-01 | no |
| Ostm1        | 14.27 | 20.74 | 0.54      | 1.77E-01 | no |
| Ktn1         | 23.70 | 17.16 | -0.47     | 1.77E-01 | no |
| Pold2        | 36.54 | 25.43 | -0.52     | 1.77E-01 | no |
| Cenpw        | 12.26 | 6.96  | -0.82     | 1.77E-01 | no |
| Rasal2       | 1.30  | 0.72  | -0.85     | 1.77E-01 | no |
| 2610002J02Ri | 5.90  | 3.00  | -0.97     | 1.77E-01 | no |
| Spa17        | 2.17  | 0.64  | -1.76     | 1.77E-01 | no |
| Tpcn1        | 16.30 | 11.53 | -0.50     | 1.77E-01 | no |

|              |       |       |            |          |    |
|--------------|-------|-------|------------|----------|----|
| Padi2        | 4.19  | 6.54  | 0.64       | 1.77E-01 | no |
| Hpcal1       | 4.80  | 8.57  | 0.83       | 1.77E-01 | no |
| Ankrd9       | 5.01  | 2.81  | -0.83      | 1.77E-01 | no |
| Cd300a       | 0.33  | 0.74  | 1.18       | 1.77E-01 | no |
| Sln3         | 14.75 | 9.13  | -0.69      | 1.78E-01 | no |
| Hyls1        | 21.99 | 14.24 | -0.63      | 1.78E-01 | no |
| Nedd4        | 43.63 | 32.11 | -0.44      | 1.78E-01 | no |
| Avpi1        | 0.39  | 1.24  | 1.68       | 1.79E-01 | no |
| Ndst1        | 12.41 | 17.20 | 0.47       | 1.79E-01 | no |
| Cdh1         | 0.03  | 0.24  | 3.12       | 1.80E-01 | no |
| Mllt6        | 9.89  | 7.01  | -0.50      | 1.80E-01 | no |
| Zbtb32       | 0.63  | 0.16  | -1.96      | 1.80E-01 | no |
| Ccl5         | 0.00  | 0.63  | 1.79769e+  | 1.80E-01 | no |
| Fam3b        | 0.00  | 0.38  | 1.79769e+  | 1.80E-01 | no |
| Papd7        | 14.47 | 10.18 | -0.51      | 1.81E-01 | no |
| Filip1       | 0.34  | 0.79  | 1.22       | 1.82E-01 | no |
| Cse1l        | 53.44 | 39.33 | -0.44      | 1.82E-01 | no |
| Scn2b        | 2.22  | 1.15  | -0.94      | 1.82E-01 | no |
| Chsy1        | 19.86 | 14.17 | -0.49      | 1.83E-01 | no |
| Pcp4         | 0.00  | 0.52  | 1.79769e+  | 1.83E-01 | no |
| A230072E10Ri | 0.09  | 0.39  | 2.12       | 1.83E-01 | no |
| Eomes        | 0.09  | 0.00  | -1.79769e- | 1.86E-01 | no |
| Mylk4        | 0.00  | 0.06  | 1.79769e+  | 1.86E-01 | no |
| Slco2a1      | 0.00  | 0.07  | 1.79769e+  | 1.86E-01 | no |
| Ccdc30       | 0.15  | 0.48  | 1.69       | 1.86E-01 | no |
| Numbl        | 0.98  | 1.99  | 1.02       | 1.86E-01 | no |
| Susd1        | 42.60 | 58.08 | 0.45       | 1.86E-01 | no |
| Cdc25a       | 24.95 | 17.93 | -0.48      | 1.86E-01 | no |
| Klhdc2       | 17.24 | 10.97 | -0.65      | 1.86E-01 | no |
| Cybb         | 6.43  | 4.03  | -0.68      | 1.86E-01 | no |
| Opn3         | 4.81  | 2.53  | -0.93      | 1.86E-01 | no |
| Mars         | 32.35 | 23.53 | -0.46      | 1.86E-01 | no |
| Wnt10a       | 0.85  | 0.03  | -4.71      | 1.86E-01 | no |
| Nup107       | 29.63 | 21.31 | -0.48      | 1.86E-01 | no |
| Lrrc40       | 12.80 | 8.63  | -0.57      | 1.87E-01 | no |
| Dmxl1        | 17.19 | 12.70 | -0.44      | 1.88E-01 | no |
| Ube2l6       | 19.82 | 29.97 | 0.60       | 1.89E-01 | no |
| Erich1       | 3.02  | 1.49  | -1.02      | 1.89E-01 | no |
| Drd5         | 0.00  | 0.11  | 1.79769e+  | 1.89E-01 | no |
| Prkar1b      | 0.00  | 0.11  | 1.79769e+  | 1.89E-01 | no |
| Myo7a        | 15.04 | 10.82 | -0.47      | 1.90E-01 | no |
| 1700054N08Ri | 8.06  | 4.92  | -0.71      | 1.91E-01 | no |

|              |       |       |       |          |    |
|--------------|-------|-------|-------|----------|----|
| Akap7        | 2.68  | 4.74  | 0.82  | 1.91E-01 | no |
| Galc         | 2.03  | 3.66  | 0.85  | 1.92E-01 | no |
| Ssh1         | 3.65  | 6.03  | 0.72  | 1.92E-01 | no |
| Ankle2       | 23.77 | 17.38 | -0.45 | 1.92E-01 | no |
| Pigt         | 38.56 | 27.93 | -0.47 | 1.92E-01 | no |
| Vgll4        | 14.42 | 22.58 | 0.65  | 1.92E-01 | no |
| Idi1         | 25.52 | 17.84 | -0.52 | 1.92E-01 | no |
| Kcnab2       | 28.21 | 20.52 | -0.46 | 1.92E-01 | no |
| Hrh2         | 4.71  | 7.85  | 0.74  | 1.93E-01 | no |
| Gm12216      | 1.53  | 3.33  | 1.12  | 1.93E-01 | no |
| Dock6        | 1.96  | 3.19  | 0.70  | 1.93E-01 | no |
| Melk         | 17.88 | 12.23 | -0.55 | 1.93E-01 | no |
| Tex11        | 0.27  | 0.02  | -3.57 | 1.93E-01 | no |
| Eid3         | 0.52  | 1.39  | 1.41  | 1.94E-01 | no |
| Cul7         | 8.12  | 11.51 | 0.50  | 1.94E-01 | no |
| Prr5         | 8.99  | 5.30  | -0.76 | 1.94E-01 | no |
| 1810014F10Ri | 1.43  | 3.49  | 1.29  | 1.95E-01 | no |
| Mcoln1       | 12.21 | 18.51 | 0.60  | 1.95E-01 | no |
| Atp6ap2      | 30.10 | 42.05 | 0.48  | 1.95E-01 | no |
| Gins3        | 16.94 | 11.27 | -0.59 | 1.95E-01 | no |
| Mospd2       | 4.35  | 7.62  | 0.81  | 1.95E-01 | no |
| Rragc        | 27.25 | 37.78 | 0.47  | 1.95E-01 | no |
| Elane        | 6.94  | 3.48  | -1.00 | 1.95E-01 | no |
| 4632415K11Ri | 1.16  | 2.29  | 0.99  | 1.95E-01 | no |
| Zfp949       | 3.56  | 5.87  | 0.72  | 1.95E-01 | no |
| Nhp2l1       | 56.27 | 39.54 | -0.51 | 1.95E-01 | no |
| Fjx1         | 0.45  | 1.10  | 1.28  | 1.96E-01 | no |
| Serpinb1b    | 0.83  | 1.87  | 1.17  | 1.96E-01 | no |
| Art2b        | 0.11  | 2.56  | 4.60  | 1.96E-01 | no |
| AI597468     | 24.87 | 17.76 | -0.49 | 1.96E-01 | no |
| E130306D19Ri | 27.53 | 18.69 | -0.56 | 1.97E-01 | no |
| Vps8         | 5.74  | 8.51  | 0.57  | 1.98E-01 | no |
| Itga5        | 7.78  | 11.28 | 0.54  | 1.98E-01 | no |
| Kcna3        | 27.93 | 19.37 | -0.53 | 1.98E-01 | no |
| Palb2        | 8.16  | 5.22  | -0.64 | 1.98E-01 | no |
| Lif          | 0.10  | 0.48  | 2.31  | 1.98E-01 | no |
| Cd27         | 5.44  | 23.53 | 2.11  | 1.98E-01 | no |
| Ccdc15       | 8.73  | 5.61  | -0.64 | 1.98E-01 | no |
| Cdh24        | 14.05 | 20.11 | 0.52  | 1.98E-01 | no |
| Smarcc1      | 52.50 | 39.04 | -0.43 | 1.98E-01 | no |
| 4930427A07Ri | 33.92 | 24.83 | -0.45 | 1.98E-01 | no |
| Mex3a        | 9.23  | 6.35  | -0.54 | 1.98E-01 | no |

|               |        |        |           |          |    |
|---------------|--------|--------|-----------|----------|----|
| Gyk           | 7.72   | 5.03   | -0.62     | 1.98E-01 | no |
| Ttc7b         | 12.01  | 17.08  | 0.51      | 1.98E-01 | no |
| Tep1          | 8.85   | 12.19  | 0.46      | 1.98E-01 | no |
| Sephs1        | 26.86  | 19.74  | -0.44     | 1.98E-01 | no |
| Cenpt         | 15.03  | 9.56   | -0.65     | 1.98E-01 | no |
| Slc7a1        | 19.57  | 14.42  | -0.44     | 1.99E-01 | no |
| Camk2b        | 9.28   | 13.04  | 0.49      | 1.99E-01 | no |
| Gprasp2       | 1.36   | 2.49   | 0.87      | 2.00E-01 | no |
| H6pd          | 8.42   | 12.01  | 0.51      | 2.00E-01 | no |
| Arf6          | 70.54  | 52.47  | -0.43     | 2.00E-01 | no |
| 1110007A13Ri  | 34.31  | 25.26  | -0.44     | 2.00E-01 | no |
| Paqr5         | 0.08   | 0.35   | 2.09      | 2.00E-01 | no |
| Agl           | 2.80   | 4.23   | 0.60      | 2.00E-01 | no |
| 0610030E20Ri  | 29.11  | 21.39  | -0.44     | 2.00E-01 | no |
| Zbtb1         | 24.15  | 17.44  | -0.47     | 2.00E-01 | no |
| Nup37         | 24.88  | 16.13  | -0.63     | 2.01E-01 | no |
| Nr1d2         | 5.62   | 8.57   | 0.61      | 2.02E-01 | no |
| Cox4i2        | 0.40   | 0.00   | -1.79769e | 2.02E-01 | no |
| Mmp10         | 0.19   | 0.00   | -1.79769e | 2.02E-01 | no |
| 4931429I11Rik | 0.09   | 0.34   | 1.89      | 2.02E-01 | no |
| Antxr1        | 0.07   | 0.24   | 1.83      | 2.02E-01 | no |
| Ap1s3         | 22.20  | 15.29  | -0.54     | 2.02E-01 | no |
| Crim1         | 0.38   | 0.15   | -1.38     | 2.02E-01 | no |
| Ttbk1         | 0.20   | 0.07   | -1.60     | 2.02E-01 | no |
| Tmem194b      | 26.05  | 19.08  | -0.45     | 2.02E-01 | no |
| Ubxn6         | 15.76  | 23.26  | 0.56      | 2.02E-01 | no |
| Tpi1          | 73.11  | 53.81  | -0.44     | 2.02E-01 | no |
| Slc22a17      | 1.08   | 2.19   | 1.02      | 2.02E-01 | no |
| Umps          | 31.22  | 22.73  | -0.46     | 2.02E-01 | no |
| Slc25a10      | 10.17  | 6.84   | -0.57     | 2.02E-01 | no |
| Abhd6         | 2.47   | 4.61   | 0.90      | 2.03E-01 | no |
| Abcb4         | 5.15   | 7.92   | 0.62      | 2.03E-01 | no |
| Dnajc13       | 19.22  | 25.99  | 0.44      | 2.03E-01 | no |
| Mrpl49        | 32.61  | 22.70  | -0.52     | 2.03E-01 | no |
| A530023O14R   | 1.06   | 2.32   | 1.13      | 2.03E-01 | no |
| Aga           | 5.01   | 9.06   | 0.85      | 2.04E-01 | no |
| Luzp1         | 7.52   | 5.22   | -0.53     | 2.04E-01 | no |
| Serp1         | 97.47  | 72.50  | -0.43     | 2.04E-01 | no |
| Ubl3          | 32.47  | 23.38  | -0.47     | 2.04E-01 | no |
| Cytip         | 24.56  | 18.06  | -0.44     | 2.04E-01 | no |
| Preli2        | 1.83   | 4.13   | 1.18      | 2.04E-01 | no |
| Hnrnph1       | 164.14 | 122.23 | -0.43     | 2.06E-01 | no |

|              |       |       |           |          |    |
|--------------|-------|-------|-----------|----------|----|
| Cbr1         | 12.95 | 20.58 | 0.67      | 2.06E-01 | no |
| Pik3r3       | 1.06  | 0.52  | -1.02     | 2.06E-01 | no |
| Mmp15        | 0.11  | 0.32  | 1.54      | 2.06E-01 | no |
| Rab3b        | 0.04  | 0.32  | 3.03      | 2.06E-01 | no |
| Pla2g4a      | 2.78  | 4.88  | 0.81      | 2.06E-01 | no |
| Tmem82       | 0.14  | 0.50  | 1.86      | 2.07E-01 | no |
| Pdzd7        | 0.12  | 0.35  | 1.56      | 2.07E-01 | no |
| Lifr         | 0.19  | 0.45  | 1.21      | 2.07E-01 | no |
| Enpp3        | 0.65  | 0.24  | -1.44     | 2.07E-01 | no |
| Abcf2        | 36.76 | 27.56 | -0.42     | 2.07E-01 | no |
| Sms          | 28.18 | 20.37 | -0.47     | 2.09E-01 | no |
| Lenep        | 5.08  | 9.74  | 0.94      | 2.09E-01 | no |
| Syncrip      | 63.02 | 49.37 | -0.35     | 2.09E-01 | no |
| Mocs1        | 6.80  | 10.34 | 0.61      | 2.10E-01 | no |
| Fam129a      | 2.19  | 3.78  | 0.79      | 2.10E-01 | no |
| Chd5         | 0.04  | 0.00  | -1.79769e | 2.10E-01 | no |
| A430084P05Ri | 1.48  | 0.53  | -1.48     | 2.10E-01 | no |
| Scly         | 13.54 | 19.66 | 0.54      | 2.10E-01 | no |
| Galnt1       | 37.90 | 28.54 | -0.41     | 2.11E-01 | no |
| Rbm14        | 53.26 | 39.49 | -0.43     | 2.11E-01 | no |
| Mid1ip1      | 24.55 | 17.17 | -0.52     | 2.11E-01 | no |
| Ubfd1        | 26.16 | 19.24 | -0.44     | 2.11E-01 | no |
| Tnfrsf10b    | 0.76  | 1.53  | 1.02      | 2.11E-01 | no |
| Fam46a       | 2.06  | 1.14  | -0.86     | 2.11E-01 | no |
| Lrrc15       | 0.30  | 0.10  | -1.62     | 2.11E-01 | no |
| Ttbk2        | 5.41  | 7.28  | 0.43      | 2.11E-01 | no |
| Usp39        | 33.74 | 24.27 | -0.48     | 2.11E-01 | no |
| Sh3pxd2a     | 4.07  | 2.80  | -0.54     | 2.11E-01 | no |
| Rps6kl1      | 0.35  | 0.85  | 1.27      | 2.12E-01 | no |
| Abcg2        | 4.10  | 7.02  | 0.78      | 2.12E-01 | no |
| Vipr2        | 1.31  | 2.49  | 0.93      | 2.13E-01 | no |
| Tha1         | 0.45  | 1.17  | 1.37      | 2.13E-01 | no |
| D730005E14Ri | 4.85  | 7.66  | 0.66      | 2.14E-01 | no |
| Nucb2        | 6.21  | 3.53  | -0.82     | 2.14E-01 | no |
| S1pr3        | 0.20  | 0.52  | 1.37      | 2.15E-01 | no |
| Dennd1a      | 10.77 | 15.02 | 0.48      | 2.15E-01 | no |
| Erlin1       | 16.42 | 11.74 | -0.48     | 2.16E-01 | no |
| Atp6v1d      | 29.10 | 41.51 | 0.51      | 2.16E-01 | no |
| Casp8ap2     | 23.08 | 17.47 | -0.40     | 2.16E-01 | no |
| 6720456H20Ri | 6.30  | 9.24  | 0.55      | 2.16E-01 | no |
| Lrrc59       | 56.80 | 42.30 | -0.43     | 2.16E-01 | no |
| Lpar6        | 10.97 | 16.68 | 0.60      | 2.17E-01 | no |



|              |       |       |           |          |    |
|--------------|-------|-------|-----------|----------|----|
| Mtmr2        | 28.31 | 20.98 | -0.43     | 2.17E-01 | no |
| Rassf3       | 23.31 | 16.78 | -0.47     | 2.17E-01 | no |
| Arhgef12     | 1.29  | 2.09  | 0.70      | 2.17E-01 | no |
| Puf60        | 69.69 | 54.74 | -0.35     | 2.17E-01 | no |
| Tbc1d17      | 12.68 | 18.23 | 0.52      | 2.17E-01 | no |
| Filip1l      | 14.08 | 9.68  | -0.54     | 2.17E-01 | no |
| Mybpc1       | 0.13  | 0.38  | 1.51      | 2.18E-01 | no |
| Lrrk2        | 4.81  | 6.90  | 0.52      | 2.18E-01 | no |
| Senp1        | 29.93 | 22.00 | -0.44     | 2.18E-01 | no |
| Nup43        | 15.03 | 9.08  | -0.73     | 2.18E-01 | no |
| Tmem191c     | 4.78  | 8.35  | 0.81      | 2.18E-01 | no |
| Pak1         | 3.54  | 5.94  | 0.75      | 2.18E-01 | no |
| Cars         | 15.45 | 10.53 | -0.55     | 2.18E-01 | no |
| Slc19a2      | 4.89  | 2.90  | -0.75     | 2.18E-01 | no |
| H2-Eb2       | 1.96  | 1.01  | -0.95     | 2.18E-01 | no |
| Tbx2         | 0.16  | 0.43  | 1.42      | 2.18E-01 | no |
| Fbxo44       | 3.17  | 5.67  | 0.84      | 2.19E-01 | no |
| Ttc38        | 4.10  | 6.49  | 0.66      | 2.19E-01 | no |
| Pwp2         | 15.10 | 10.68 | -0.50     | 2.19E-01 | no |
| Sla          | 15.91 | 22.64 | 0.51      | 2.19E-01 | no |
| Atrnl1       | 4.26  | 2.71  | -0.65     | 2.19E-01 | no |
| 2210013O21Ri | 8.79  | 15.53 | 0.82      | 2.19E-01 | no |
| Cyp4f17      | 0.90  | 1.97  | 1.13      | 2.20E-01 | no |
| Ndufs1       | 36.94 | 28.60 | -0.37     | 2.20E-01 | no |
| Txndc16      | 14.69 | 20.41 | 0.47      | 2.20E-01 | no |
| Pole2        | 18.21 | 11.76 | -0.63     | 2.20E-01 | no |
| Cycs         | 12.08 | 7.93  | -0.61     | 2.21E-01 | no |
| Slc35f3      | 0.11  | 0.00  | -1.79769e | 2.21E-01 | no |
| Grasp        | 1.28  | 2.57  | 1.01      | 2.21E-01 | no |
| 2900092E17Ri | 35.10 | 24.66 | -0.51     | 2.21E-01 | no |
| Arhgap31     | 3.75  | 2.45  | -0.61     | 2.21E-01 | no |
| Zfp182       | 6.09  | 8.73  | 0.52      | 2.21E-01 | no |
| Fbxo17       | 0.82  | 1.75  | 1.10      | 2.22E-01 | no |
| Itfg3        | 1.94  | 3.59  | 0.89      | 2.23E-01 | no |
| Prosapip1    | 1.40  | 0.73  | -0.93     | 2.23E-01 | no |
| Ltbr         | 0.55  | 1.24  | 1.18      | 2.23E-01 | no |
| 5830432E09Ri | 1.97  | 3.84  | 0.96      | 2.23E-01 | no |
| Uba2         | 54.77 | 40.75 | -0.43     | 2.23E-01 | no |
| Csgalnact2   | 6.02  | 3.68  | -0.71     | 2.23E-01 | no |
| Acox1        | 0.19  | 0.53  | 1.48      | 2.23E-01 | no |
| Impg2        | 0.11  | 0.30  | 1.40      | 2.23E-01 | no |
| Lrrc23       | 1.52  | 0.60  | -1.34     | 2.23E-01 | no |

|               |        |        |       |          |    |
|---------------|--------|--------|-------|----------|----|
| 2700099C18Ri  | 19.18  | 12.14  | -0.66 | 2.23E-01 | no |
| Mat2a         | 119.90 | 90.05  | -0.41 | 2.25E-01 | no |
| Itpr1         | 9.55   | 12.94  | 0.44  | 2.26E-01 | no |
| Tcp1          | 92.37  | 69.29  | -0.41 | 2.26E-01 | no |
| Plekho1       | 41.76  | 29.87  | -0.48 | 2.26E-01 | no |
| Srpk2         | 11.39  | 15.61  | 0.45  | 2.27E-01 | no |
| Ctla2a        | 0.58   | 1.65   | 1.51  | 2.27E-01 | no |
| Slc35e1       | 18.86  | 14.02  | -0.43 | 2.28E-01 | no |
| Insl6         | 7.27   | 13.56  | 0.90  | 2.28E-01 | no |
| Shpk          | 1.03   | 2.00   | 0.97  | 2.28E-01 | no |
| Actb          | 503.99 | 366.22 | -0.46 | 2.29E-01 | no |
| 8430427H17Ri  | 0.88   | 0.42   | -1.08 | 2.29E-01 | no |
| Arid4b        | 16.29  | 21.68  | 0.41  | 2.30E-01 | no |
| Srrt          | 79.11  | 64.21  | -0.30 | 2.30E-01 | no |
| Mthfd1        | 26.28  | 19.27  | -0.45 | 2.30E-01 | no |
| Suox          | 3.83   | 2.12   | -0.86 | 2.30E-01 | no |
| Gabpb2        | 47.93  | 38.75  | -0.31 | 2.31E-01 | no |
| Pgbd5         | 0.03   | 0.44   | 3.86  | 2.32E-01 | no |
| Gyltl1b       | 0.44   | 1.10   | 1.32  | 2.32E-01 | no |
| Abcc1         | 2.27   | 3.66   | 0.69  | 2.32E-01 | no |
| Atp6v1h       | 20.96  | 29.76  | 0.51  | 2.32E-01 | no |
| Rod1          | 84.41  | 66.75  | -0.34 | 2.32E-01 | no |
| Xist          | 144.37 | 102.41 | -0.50 | 2.32E-01 | no |
| Gm885         | 13.22  | 7.95   | -0.73 | 2.32E-01 | no |
| Xpo4          | 17.24  | 12.14  | -0.51 | 2.32E-01 | no |
| Cdc42bpb      | 0.24   | 0.10   | -1.34 | 2.32E-01 | no |
| Wdr59         | 5.64   | 8.13   | 0.53  | 2.33E-01 | no |
| Kctd9         | 18.22  | 13.09  | -0.48 | 2.33E-01 | no |
| BC024659      | 10.97  | 7.50   | -0.55 | 2.33E-01 | no |
| Orc5          | 12.71  | 8.05   | -0.66 | 2.33E-01 | no |
| 1200014J11RiI | 14.60  | 10.66  | -0.45 | 2.34E-01 | no |
| Nup62         | 62.72  | 46.97  | -0.42 | 2.35E-01 | no |
| Dennd1c       | 9.85   | 14.48  | 0.56  | 2.35E-01 | no |
| Ppan          | 30.56  | 21.71  | -0.49 | 2.35E-01 | no |
| Gm9705        | 0.34   | 0.83   | 1.30  | 2.36E-01 | no |
| Poc1a         | 14.89  | 9.58   | -0.64 | 2.36E-01 | no |
| Layn          | 0.66   | 1.50   | 1.19  | 2.36E-01 | no |
| Rnf180        | 0.07   | 0.31   | 2.13  | 2.36E-01 | no |
| Lipg          | 0.17   | 0.44   | 1.39  | 2.36E-01 | no |
| Zfp35         | 18.77  | 13.26  | -0.50 | 2.37E-01 | no |
| Usp35         | 0.79   | 1.52   | 0.94  | 2.37E-01 | no |
| Gyg           | 15.50  | 22.98  | 0.57  | 2.37E-01 | no |

|               |        |        |           |          |    |
|---------------|--------|--------|-----------|----------|----|
| Cobll1        | 9.73   | 6.91   | -0.49     | 2.38E-01 | no |
| Kcnk3         | 0.13   | 0.36   | 1.47      | 2.39E-01 | no |
| Amdhd2        | 10.55  | 16.39  | 0.64      | 2.39E-01 | no |
| Slc25a5       | 206.90 | 156.11 | -0.41     | 2.39E-01 | no |
| A430005L14Ri  | 10.98  | 17.31  | 0.66      | 2.39E-01 | no |
| Adam6b        | 0.64   | 1.41   | 1.13      | 2.39E-01 | no |
| Stac2         | 1.02   | 0.48   | -1.10     | 2.40E-01 | no |
| Clec4f        | 1.22   | 2.41   | 0.98      | 2.40E-01 | no |
| Ccdc62        | 0.90   | 1.72   | 0.94      | 2.40E-01 | no |
| Gramd1b       | 1.86   | 3.32   | 0.83      | 2.40E-01 | no |
| Gm14446       | 3.93   | 6.73   | 0.77      | 2.40E-01 | no |
| Rnaset2a,Rnas | 40.99  | 57.66  | 0.49      | 2.40E-01 | no |
| Mfng          | 23.07  | 32.42  | 0.49      | 2.40E-01 | no |
| Trim12a       | 26.42  | 37.10  | 0.49      | 2.40E-01 | no |
| Actg1         | 126.70 | 95.53  | -0.41     | 2.40E-01 | no |
| Msh6          | 46.09  | 34.72  | -0.41     | 2.40E-01 | no |
| B230219D22Ri  | 44.87  | 33.76  | -0.41     | 2.40E-01 | no |
| Lsm6          | 16.78  | 12.03  | -0.48     | 2.40E-01 | no |
| Dusp1         | 7.95   | 4.75   | -0.74     | 2.40E-01 | no |
| 1700001L05Ril | 1.81   | 1.03   | -0.82     | 2.40E-01 | no |
| Ifit3         | 1.90   | 0.90   | -1.07     | 2.40E-01 | no |
| Lgr4          | 0.50   | 0.22   | -1.18     | 2.40E-01 | no |
| Tekt1         | 0.23   | 0.79   | 1.76      | 2.41E-01 | no |
| Hspa1l        | 2.87   | 1.57   | -0.87     | 2.41E-01 | no |
| Mcm8          | 10.45  | 6.92   | -0.60     | 2.41E-01 | no |
| Klraq1        | 15.97  | 22.04  | 0.46      | 2.41E-01 | no |
| Kpna1         | 26.62  | 19.64  | -0.44     | 2.41E-01 | no |
| Slc9a9        | 1.03   | 2.04   | 0.98      | 2.42E-01 | no |
| Npm3          | 40.16  | 26.88  | -0.58     | 2.42E-01 | no |
| Gm12824       | 0.03   | 0.14   | 2.46      | 2.42E-01 | no |
| 5930416I19Rik | 44.98  | 33.71  | -0.42     | 2.42E-01 | no |
| L3mbtl2       | 19.98  | 14.48  | -0.46     | 2.42E-01 | no |
| Ttll1         | 8.15   | 5.00   | -0.71     | 2.42E-01 | no |
| Fam129c       | 69.74  | 52.50  | -0.41     | 2.42E-01 | no |
| Itm2a         | 2.15   | 4.13   | 0.94      | 2.43E-01 | no |
| Nlrc3         | 9.82   | 13.86  | 0.50      | 2.43E-01 | no |
| Zfp422        | 42.81  | 31.88  | -0.43     | 2.43E-01 | no |
| Fh1           | 48.25  | 35.25  | -0.45     | 2.43E-01 | no |
| Zmynd10       | 0.55   | 0.16   | -1.79     | 2.43E-01 | no |
| Cd300lg       | 0.00   | 0.13   | 1.79769e+ | 2.43E-01 | no |
| Trove2        | 1.50   | 2.48   | 0.72      | 2.43E-01 | no |
| Nanos1        | 0.92   | 0.44   | -1.06     | 2.43E-01 | no |

|              |        |        |            |          |    |
|--------------|--------|--------|------------|----------|----|
| Samd5        | 0.39   | 0.05   | -3.03      | 2.43E-01 | no |
| Zfp109       | 1.25   | 2.32   | 0.90       | 2.43E-01 | no |
| Slc28a2      | 10.61  | 15.09  | 0.51       | 2.43E-01 | no |
| Ifi30        | 16.40  | 9.99   | -0.72      | 2.44E-01 | no |
| Lrp8         | 3.41   | 5.01   | 0.56       | 2.44E-01 | no |
| Amy1         | 0.00   | 0.19   | 1.79769e+  | 2.44E-01 | no |
| Ube2d2       | 108.09 | 81.59  | -0.41      | 2.45E-01 | no |
| Acad10       | 2.60   | 4.28   | 0.72       | 2.45E-01 | no |
| Zfp64        | 9.02   | 13.14  | 0.54       | 2.45E-01 | no |
| Thumpd2      | 4.91   | 8.14   | 0.73       | 2.46E-01 | no |
| Hdac1        | 82.79  | 62.31  | -0.41      | 2.46E-01 | no |
| Mlf1ip       | 6.12   | 3.67   | -0.74      | 2.46E-01 | no |
| Rbbp4        | 60.46  | 45.77  | -0.40      | 2.46E-01 | no |
| 5730469M10R  | 4.40   | 7.63   | 0.80       | 2.46E-01 | no |
| Ttll5        | 8.91   | 6.18   | -0.53      | 2.46E-01 | no |
| Sult6b1      | 3.03   | 5.46   | 0.85       | 2.47E-01 | no |
| Tube1        | 10.76  | 7.03   | -0.61      | 2.47E-01 | no |
| Med7         | 15.54  | 10.43  | -0.58      | 2.47E-01 | no |
| Prss12       | 0.10   | 0.00   | -1.79769e- | 2.47E-01 | no |
| Slc38a5      | 0.16   | 0.00   | -1.79769e- | 2.47E-01 | no |
| Wipf1        | 32.69  | 43.33  | 0.41       | 2.47E-01 | no |
| Msn          | 106.32 | 80.19  | -0.41      | 2.48E-01 | no |
| Gm13238      | 1.06   | 2.47   | 1.22       | 2.48E-01 | no |
| C1qa         | 1.16   | 0.40   | -1.52      | 2.48E-01 | no |
| 5330417C22Ri | 0.00   | 0.08   | 1.79769e+  | 2.48E-01 | no |
| Cd163l1      | 0.00   | 0.08   | 1.79769e+  | 2.48E-01 | no |
| Crisp1       | 0.00   | 0.28   | 1.79769e+  | 2.48E-01 | no |
| Notum        | 0.00   | 0.13   | 1.79769e+  | 2.48E-01 | no |
| Nrn1         | 0.00   | 0.22   | 1.79769e+  | 2.48E-01 | no |
| Perp         | 0.00   | 0.18   | 1.79769e+  | 2.48E-01 | no |
| Trpv6        | 0.00   | 0.09   | 1.79769e+  | 2.48E-01 | no |
| Itga3        | 0.19   | 0.45   | 1.27       | 2.48E-01 | no |
| 4933407H18Ri | 4.35   | 6.24   | 0.52       | 2.48E-01 | no |
| Slc36a1      | 7.57   | 10.67  | 0.50       | 2.48E-01 | no |
| B230206F22Ri | 20.88  | 15.88  | -0.39      | 2.48E-01 | no |
| Psme3        | 66.53  | 50.19  | -0.41      | 2.48E-01 | no |
| Erh          | 208.63 | 157.34 | -0.41      | 2.48E-01 | no |
| Dock5        | 0.93   | 0.53   | -0.82      | 2.48E-01 | no |
| Dnajb7       | 1.09   | 0.36   | -1.61      | 2.48E-01 | no |
| Clec4a3      | 0.18   | 0.84   | 2.23       | 2.49E-01 | no |
| Apob48r      | 0.58   | 1.14   | 0.98       | 2.49E-01 | no |
| Nxn          | 7.30   | 4.59   | -0.67      | 2.49E-01 | no |

|              |        |        |            |          |    |
|--------------|--------|--------|------------|----------|----|
| Hook1        | 10.56  | 14.75  | 0.48       | 2.49E-01 | no |
| Neu1         | 9.90   | 13.92  | 0.49       | 2.50E-01 | no |
| Hexim1       | 21.62  | 15.71  | -0.46      | 2.50E-01 | no |
| Pde6b        | 0.00   | 0.10   | 1.79769e+  | 2.51E-01 | no |
| Vegfb        | 18.37  | 26.68  | 0.54       | 2.52E-01 | no |
| Eda          | 0.00   | 0.06   | 1.79769e+  | 2.52E-01 | no |
| Ano10        | 3.99   | 6.54   | 0.71       | 2.53E-01 | no |
| Zfp36l2      | 90.95  | 120.77 | 0.41       | 2.53E-01 | no |
| 1110002B05Ri | 44.59  | 31.52  | -0.50      | 2.53E-01 | no |
| Ppm1g        | 62.21  | 46.89  | -0.41      | 2.53E-01 | no |
| Cd209f       | 0.25   | 0.00   | -1.79769e- | 2.53E-01 | no |
| Chn2         | 0.75   | 0.32   | -1.21      | 2.53E-01 | no |
| Stoml1       | 10.33  | 14.96  | 0.54       | 2.53E-01 | no |
| Jak3         | 23.12  | 30.03  | 0.38       | 2.53E-01 | no |
| Matk         | 4.22   | 7.16   | 0.76       | 2.53E-01 | no |
| Lyl1         | 46.61  | 62.30  | 0.42       | 2.53E-01 | no |
| Pkmyt1       | 39.09  | 28.82  | -0.44      | 2.53E-01 | no |
| Mad1l1       | 19.96  | 14.35  | -0.48      | 2.53E-01 | no |
| Cxcr3        | 0.05   | 0.98   | 4.30       | 2.55E-01 | no |
| Svil         | 7.94   | 10.77  | 0.44       | 2.55E-01 | no |
| Inpp4a       | 3.34   | 5.02   | 0.59       | 2.55E-01 | no |
| Plcl2        | 31.59  | 23.70  | -0.41      | 2.56E-01 | no |
| Fam26f       | 2.64   | 5.18   | 0.98       | 2.56E-01 | no |
| Tmem66       | 7.15   | 11.35  | 0.67       | 2.56E-01 | no |
| Fxyd6        | 7.44   | 4.32   | -0.78      | 2.57E-01 | no |
| Rhobtb1      | 0.63   | 1.23   | 0.96       | 2.57E-01 | no |
| Zfp821       | 13.94  | 9.80   | -0.51      | 2.57E-01 | no |
| Fkbp4        | 67.59  | 51.15  | -0.40      | 2.58E-01 | no |
| Npm1         | 167.99 | 127.56 | -0.40      | 2.58E-01 | no |
| Afap1l1      | 2.24   | 3.82   | 0.77       | 2.59E-01 | no |
| Glb1         | 12.10  | 17.46  | 0.53       | 2.59E-01 | no |
| Hat1         | 42.64  | 30.72  | -0.47      | 2.59E-01 | no |
| Ppl          | 0.37   | 0.17   | -1.14      | 2.59E-01 | no |
| Wdr13        | 10.54  | 14.37  | 0.45       | 2.59E-01 | no |
| Vps39        | 15.43  | 20.13  | 0.38       | 2.59E-01 | no |
| Tmem79       | 1.49   | 2.77   | 0.90       | 2.59E-01 | no |
| Tnfrsf1a     | 2.32   | 4.19   | 0.85       | 2.60E-01 | no |
| Cpd          | 5.91   | 4.14   | -0.51      | 2.60E-01 | no |
| Snrpg        | 224.57 | 165.81 | -0.44      | 2.60E-01 | no |
| Nubp1        | 25.33  | 18.15  | -0.48      | 2.60E-01 | no |
| E130311K13Ri | 0.58   | 1.41   | 1.29       | 2.61E-01 | no |
| Pold4        | 37.92  | 25.86  | -0.55      | 2.61E-01 | no |

|              |        |        |            |          |    |
|--------------|--------|--------|------------|----------|----|
| Anks6        | 0.04   | 0.24   | 2.65       | 2.61E-01 | no |
| Tagln2       | 88.85  | 66.76  | -0.41      | 2.61E-01 | no |
| Topbp1       | 53.03  | 40.35  | -0.39      | 2.61E-01 | no |
| Calm1        | 65.27  | 49.61  | -0.40      | 2.61E-01 | no |
| Rpsa         | 43.44  | 32.02  | -0.44      | 2.62E-01 | no |
| Ptgr1        | 31.36  | 22.61  | -0.47      | 2.62E-01 | no |
| Glrx3        | 28.68  | 20.04  | -0.52      | 2.62E-01 | no |
| Rfc2         | 49.35  | 36.34  | -0.44      | 2.62E-01 | no |
| Kars         | 55.39  | 42.85  | -0.37      | 2.63E-01 | no |
| Klf3         | 7.12   | 11.07  | 0.64       | 2.63E-01 | no |
| Vps13c       | 6.59   | 8.86   | 0.43       | 2.63E-01 | no |
| Cdk5rap2     | 14.04  | 10.36  | -0.44      | 2.63E-01 | no |
| Ddx11        | 14.79  | 10.71  | -0.47      | 2.63E-01 | no |
| Dpy19l1      | 14.32  | 10.30  | -0.48      | 2.63E-01 | no |
| Efcab5       | 0.72   | 0.35   | -1.02      | 2.64E-01 | no |
| Shisa7       | 0.00   | 0.04   | 1.79769e+  | 2.65E-01 | no |
| Pip5k1b      | 4.29   | 2.50   | -0.78      | 2.65E-01 | no |
| Zfp191       | 23.63  | 17.19  | -0.46      | 2.65E-01 | no |
| Slc29a4      | 0.50   | 1.04   | 1.07       | 2.65E-01 | no |
| Rpl41        | 470.32 | 358.19 | -0.39      | 2.66E-01 | no |
| Aloxe3       | 0.03   | 0.32   | 3.59       | 2.66E-01 | no |
| 9230105E10Ri | 25.54  | 33.45  | 0.39       | 2.66E-01 | no |
| Slc35e4      | 0.53   | 1.13   | 1.09       | 2.67E-01 | no |
| Nudt1        | 17.82  | 11.00  | -0.70      | 2.67E-01 | no |
| Clec9a       | 0.00   | 0.23   | 1.79769e+  | 2.67E-01 | no |
| Gpr20        | 0.00   | 0.12   | 1.79769e+  | 2.67E-01 | no |
| Eml2         | 3.79   | 6.18   | 0.71       | 2.67E-01 | no |
| Bub3         | 56.59  | 42.49  | -0.41      | 2.67E-01 | no |
| Rptor        | 16.94  | 22.42  | 0.40       | 2.67E-01 | no |
| Dcp2         | 25.21  | 19.11  | -0.40      | 2.67E-01 | no |
| Gnb1         | 76.32  | 60.72  | -0.33      | 2.67E-01 | no |
| Prss34       | 0.21   | 0.85   | 1.99       | 2.68E-01 | no |
| Rundc2a      | 4.61   | 7.99   | 0.79       | 2.68E-01 | no |
| Cblc         | 0.13   | 0.00   | -1.79769e- | 2.68E-01 | no |
| Cxcr7        | 0.13   | 0.00   | -1.79769e- | 2.68E-01 | no |
| Dbx1         | 0.12   | 0.00   | -1.79769e- | 2.68E-01 | no |
| Dusp8        | 0.10   | 0.00   | -1.79769e- | 2.68E-01 | no |
| Gm4980       | 0.09   | 0.00   | -1.79769e- | 2.68E-01 | no |
| Ooep         | 0.25   | 0.00   | -1.79769e- | 2.68E-01 | no |
| 3-Sep        | 0.06   | 0.00   | -1.79769e- | 2.68E-01 | no |
| Sox8         | 0.09   | 0.00   | -1.79769e- | 2.68E-01 | no |
| Gnao1        | 0.07   | 0.29   | 2.11       | 2.68E-01 | no |

|              |        |        |            |          |    |
|--------------|--------|--------|------------|----------|----|
| Asah1        | 10.97  | 16.34  | 0.57       | 2.68E-01 | no |
| Mtpn         | 76.99  | 58.68  | -0.39      | 2.68E-01 | no |
| Rbmxrt       | 134.83 | 102.68 | -0.39      | 2.68E-01 | no |
| Pkm2         | 150.90 | 114.89 | -0.39      | 2.68E-01 | no |
| Zfp459       | 0.80   | 1.54   | 0.95       | 2.68E-01 | no |
| Arhgap44     | 0.00   | 0.06   | 1.79769e+  | 2.69E-01 | no |
| Ppp2r5a      | 40.37  | 30.35  | -0.41      | 2.69E-01 | no |
| Slc7a5       | 32.87  | 24.74  | -0.41      | 2.69E-01 | no |
| Tti1         | 21.63  | 15.98  | -0.44      | 2.69E-01 | no |
| Hprt         | 66.01  | 48.59  | -0.44      | 2.69E-01 | no |
| Pkp4         | 10.57  | 7.65   | -0.47      | 2.69E-01 | no |
| Etaa1        | 14.31  | 10.20  | -0.49      | 2.70E-01 | no |
| Glt25d1      | 47.93  | 36.38  | -0.40      | 2.70E-01 | no |
| Ebpl         | 2.11   | 3.87   | 0.88       | 2.70E-01 | no |
| Abcd1        | 32.65  | 24.58  | -0.41      | 2.70E-01 | no |
| Calm3        | 100.82 | 76.97  | -0.39      | 2.70E-01 | no |
| Tmem64       | 19.64  | 14.42  | -0.45      | 2.71E-01 | no |
| Dnaic2       | 0.11   | 0.35   | 1.59       | 2.71E-01 | no |
| Sirt1        | 26.25  | 19.90  | -0.40      | 2.71E-01 | no |
| Csde1        | 67.15  | 53.85  | -0.32      | 2.71E-01 | no |
| Ppp1r15a     | 2.67   | 4.50   | 0.75       | 2.72E-01 | no |
| Glipr2       | 8.07   | 12.53  | 0.64       | 2.72E-01 | no |
| Dnajc7       | 46.19  | 34.70  | -0.41      | 2.72E-01 | no |
| Parp3        | 7.03   | 10.52  | 0.58       | 2.73E-01 | no |
| Cotl1        | 42.16  | 30.93  | -0.45      | 2.73E-01 | no |
| Ngfr         | 0.21   | 0.04   | -2.30      | 2.74E-01 | no |
| Duxbl,Gm1039 | 0.00   | 0.15   | 1.79769e+  | 2.74E-01 | no |
| Stard10      | 6.87   | 11.31  | 0.72       | 2.74E-01 | no |
| Gart         | 39.77  | 30.15  | -0.40      | 2.74E-01 | no |
| Tk1          | 54.44  | 40.23  | -0.44      | 2.74E-01 | no |
| Stard8       | 3.59   | 5.43   | 0.60       | 2.75E-01 | no |
| Snx10        | 9.15   | 13.54  | 0.57       | 2.75E-01 | no |
| Dirc2        | 1.26   | 2.23   | 0.82       | 2.75E-01 | no |
| Fndc3a       | 14.26  | 19.07  | 0.42       | 2.75E-01 | no |
| Kcnq5        | 6.68   | 4.72   | -0.50      | 2.75E-01 | no |
| Ckap4        | 4.80   | 7.43   | 0.63       | 2.75E-01 | no |
| Nup93        | 28.25  | 20.97  | -0.43      | 2.76E-01 | no |
| Al413582     | 4.18   | 7.90   | 0.92       | 2.76E-01 | no |
| Irgc1        | 0.00   | 0.12   | 1.79769e+  | 2.76E-01 | no |
| Aanat        | 0.33   | 0.00   | -1.79769e- | 2.76E-01 | no |
| Anapc5       | 67.80  | 52.42  | -0.37      | 2.76E-01 | no |
| Tmem106a     | 0.88   | 1.73   | 0.98       | 2.76E-01 | no |

|              |        |        |            |          |    |
|--------------|--------|--------|------------|----------|----|
| Cln5         | 11.03  | 16.08  | 0.54       | 2.76E-01 | no |
| Zfp12        | 6.98   | 9.97   | 0.51       | 2.76E-01 | no |
| Ctcf         | 70.72  | 54.07  | -0.39      | 2.76E-01 | no |
| Cct8         | 70.16  | 53.35  | -0.40      | 2.76E-01 | no |
| Tmem65       | 5.90   | 3.70   | -0.67      | 2.76E-01 | no |
| Cd9          | 9.40   | 15.20  | 0.69       | 2.77E-01 | no |
| Akap3        | 0.00   | 0.07   | 1.79769e+  | 2.77E-01 | no |
| Iqcf5        | 0.00   | 0.44   | 1.79769e+  | 2.77E-01 | no |
| Mboat4       | 0.00   | 0.12   | 1.79769e+  | 2.77E-01 | no |
| Irf5         | 16.65  | 23.37  | 0.49       | 2.77E-01 | no |
| Dyrk2        | 35.00  | 25.93  | -0.43      | 2.77E-01 | no |
| Cldn12       | 0.58   | 1.19   | 1.04       | 2.77E-01 | no |
| Tet1         | 3.98   | 5.51   | 0.47       | 2.79E-01 | no |
| Gtf3c5       | 19.46  | 14.05  | -0.47      | 2.79E-01 | no |
| St6galnac2   | 0.11   | 0.49   | 2.10       | 2.79E-01 | no |
| Tspyl3       | 9.17   | 13.24  | 0.53       | 2.80E-01 | no |
| Ipo11        | 20.26  | 15.01  | -0.43      | 2.81E-01 | no |
| Fgf11        | 0.42   | 0.00   | -1.79769e- | 2.81E-01 | no |
| Eng          | 14.35  | 18.91  | 0.40       | 2.81E-01 | no |
| Mtap         | 18.95  | 13.33  | -0.51      | 2.81E-01 | no |
| Slc9a5       | 5.84   | 3.95   | -0.57      | 2.81E-01 | no |
| Gm10069      | 6.77   | 4.48   | -0.59      | 2.81E-01 | no |
| Stk38l       | 4.15   | 2.60   | -0.67      | 2.81E-01 | no |
| Ccdc120      | 1.00   | 1.87   | 0.90       | 2.81E-01 | no |
| Gm8989       | 3.85   | 6.48   | 0.75       | 2.81E-01 | no |
| Znf512b      | 10.70  | 14.40  | 0.43       | 2.81E-01 | no |
| Cdk2ap1      | 111.57 | 84.79  | -0.40      | 2.81E-01 | no |
| Cebpg        | 28.48  | 21.50  | -0.41      | 2.81E-01 | no |
| Pard6b       | 0.83   | 1.54   | 0.90       | 2.82E-01 | no |
| Zfp783       | 4.17   | 6.23   | 0.58       | 2.83E-01 | no |
| Pnrc1        | 23.59  | 32.44  | 0.46       | 2.83E-01 | no |
| Fgd4         | 0.24   | 0.59   | 1.27       | 2.84E-01 | no |
| Gas5         | 46.92  | 35.40  | -0.41      | 2.84E-01 | no |
| S100a10      | 49.20  | 33.38  | -0.56      | 2.84E-01 | no |
| Adm          | 0.62   | 0.16   | -1.97      | 2.84E-01 | no |
| Cr2          | 0.81   | 0.41   | -0.96      | 2.85E-01 | no |
| 4930579G24Ri | 24.58  | 17.28  | -0.51      | 2.86E-01 | no |
| Gcat         | 5.83   | 3.59   | -0.70      | 2.86E-01 | no |
| Hsp90ab1     | 401.83 | 296.74 | -0.44      | 2.87E-01 | no |
| Cyp4f13      | 3.74   | 6.35   | 0.77       | 2.87E-01 | no |
| Pms2         | 14.53  | 10.30  | -0.50      | 2.87E-01 | no |
| Dock4        | 0.27   | 0.12   | -1.19      | 2.87E-01 | no |



|              |       |       |           |          |    |
|--------------|-------|-------|-----------|----------|----|
| Siva1        | 49.76 | 35.18 | -0.50     | 2.87E-01 | no |
| Zfp174       | 0.51  | 0.96  | 0.91      | 2.88E-01 | no |
| Lamp1        | 41.27 | 54.49 | 0.40      | 2.88E-01 | no |
| Tial1        | 26.34 | 19.76 | -0.41     | 2.88E-01 | no |
| Akr1c13      | 0.97  | 2.09  | 1.10      | 2.88E-01 | no |
| Mapre1       | 36.15 | 27.71 | -0.38     | 2.89E-01 | no |
| A430105I19Ri | 0.67  | 1.24  | 0.89      | 2.89E-01 | no |
| Xrcc2        | 10.59 | 7.19  | -0.56     | 2.89E-01 | no |
| Ppp1cb       | 73.18 | 56.08 | -0.38     | 2.89E-01 | no |
| A930015D03R  | 5.73  | 10.02 | 0.81      | 2.90E-01 | no |
| Rgs13        | 0.55  | 0.11  | -2.36     | 2.90E-01 | no |
| F9           | 0.54  | 1.17  | 1.12      | 2.90E-01 | no |
| Mn1          | 0.02  | 0.12  | 2.76      | 2.91E-01 | no |
| C030034L19Ri | 0.13  | 0.42  | 1.68      | 2.91E-01 | no |
| Gamt         | 0.61  | 1.53  | 1.32      | 2.91E-01 | no |
| Psip1        | 44.34 | 33.75 | -0.39     | 2.91E-01 | no |
| Dkc1         | 34.44 | 25.79 | -0.42     | 2.91E-01 | no |
| Gemin6       | 19.31 | 12.43 | -0.64     | 2.91E-01 | no |
| Plekhh3      | 0.87  | 0.42  | -1.06     | 2.91E-01 | no |
| C330006K01Ri | 9.48  | 13.13 | 0.47      | 2.91E-01 | no |
| Slc25a1      | 28.90 | 39.28 | 0.44      | 2.92E-01 | no |
| Foxc1        | 0.12  | 0.32  | 1.47      | 2.92E-01 | no |
| C630004H02Ri | 0.17  | 0.43  | 1.31      | 2.92E-01 | no |
| Casz1        | 3.54  | 2.39  | -0.56     | 2.92E-01 | no |
| Fxn          | 20.59 | 13.49 | -0.61     | 2.92E-01 | no |
| Pom121       | 36.83 | 28.27 | -0.38     | 2.92E-01 | no |
| Cntnap1      | 0.86  | 1.54  | 0.84      | 2.93E-01 | no |
| Gcnt2        | 0.27  | 0.60  | 1.15      | 2.93E-01 | no |
| Rab43        | 57.26 | 45.41 | -0.33     | 2.93E-01 | no |
| Dact3        | 0.21  | 0.51  | 1.26      | 2.93E-01 | no |
| Hyal3        | 0.29  | 0.75  | 1.37      | 2.94E-01 | no |
| Slc16a4      | 2.92  | 1.59  | -0.88     | 2.95E-01 | no |
| Tmtc2        | 0.06  | 0.21  | 1.71      | 2.95E-01 | no |
| Ints10       | 18.50 | 13.13 | -0.49     | 2.96E-01 | no |
| D630041G03R  | 0.00  | 0.06  | 1.79769e+ | 2.96E-01 | no |
| Gm7444       | 0.43  | 0.87  | 1.02      | 2.96E-01 | no |
| 1810049H13Ri | 2.62  | 5.01  | 0.93      | 2.96E-01 | no |
| BC026585     | 4.87  | 8.30  | 0.77      | 2.96E-01 | no |
| Fgd6         | 2.17  | 1.36  | -0.67     | 2.96E-01 | no |
| Cyp2j9       | 3.82  | 6.53  | 0.77      | 2.96E-01 | no |
| Cd177        | 0.28  | 0.65  | 1.21      | 2.98E-01 | no |
| Mcf2l        | 0.67  | 0.31  | -1.10     | 2.98E-01 | no |

|              |       |       |           |          |    |
|--------------|-------|-------|-----------|----------|----|
| Rb1cc1       | 14.23 | 18.83 | 0.40      | 2.98E-01 | no |
| Cbs          | 0.10  | 0.00  | -1.79769e | 2.98E-01 | no |
| Rhoj         | 0.11  | 0.00  | -1.79769e | 2.98E-01 | no |
| Pnpo         | 6.41  | 9.93  | 0.63      | 2.98E-01 | no |
| Dsn1         | 21.30 | 15.19 | -0.49     | 2.98E-01 | no |
| Dazap1       | 59.21 | 47.01 | -0.33     | 2.98E-01 | no |
| Sp110        | 35.43 | 47.22 | 0.41      | 2.99E-01 | no |
| Scrib        | 26.69 | 20.44 | -0.38     | 2.99E-01 | no |
| Chac1        | 0.09  | 0.51  | 2.53      | 3.00E-01 | no |
| Hoxa7        | 1.91  | 3.57  | 0.90      | 3.00E-01 | no |
| Hoxa6        | 0.78  | 1.99  | 1.34      | 3.01E-01 | no |
| Frat1        | 4.82  | 2.95  | -0.71     | 3.01E-01 | no |
| Kdm6b        | 9.96  | 13.30 | 0.42      | 3.01E-01 | no |
| Smtn         | 22.56 | 29.96 | 0.41      | 3.02E-01 | no |
| Ndufv1       | 40.65 | 29.98 | -0.44     | 3.02E-01 | no |
| Opa3         | 19.80 | 14.08 | -0.49     | 3.02E-01 | no |
| Mdfi         | 0.41  | 1.02  | 1.31      | 3.03E-01 | no |
| Aim1         | 7.99  | 5.86  | -0.45     | 3.03E-01 | no |
| Gpr157       | 1.56  | 2.63  | 0.75      | 3.03E-01 | no |
| Psat1        | 63.60 | 48.47 | -0.39     | 3.04E-01 | no |
| Gpr171       | 22.62 | 16.07 | -0.49     | 3.04E-01 | no |
| 3930402G23Ri | 0.36  | 0.10  | -1.85     | 3.04E-01 | no |
| Icam2        | 34.02 | 23.91 | -0.51     | 3.05E-01 | no |
| Fam98a       | 21.48 | 15.68 | -0.45     | 3.05E-01 | no |
| E2f5         | 6.53  | 3.90  | -0.74     | 3.05E-01 | no |
| Selenbp1     | 3.71  | 6.21  | 0.74      | 3.05E-01 | no |
| 4930473A06Ri | 2.28  | 3.59  | 0.66      | 3.05E-01 | no |
| 2810403D21Ri | 1.04  | 2.29  | 1.14      | 3.06E-01 | no |
| Snx29        | 4.51  | 7.40  | 0.72      | 3.06E-01 | no |
| Pml          | 37.73 | 30.32 | -0.32     | 3.06E-01 | no |
| S100a6       | 2.62  | 5.12  | 0.96      | 3.06E-01 | no |
| Nutf2-ps1    | 22.67 | 14.56 | -0.64     | 3.06E-01 | no |
| Gm6034       | 0.44  | 1.02  | 1.23      | 3.06E-01 | no |
| Athl1        | 12.33 | 17.02 | 0.47      | 3.06E-01 | no |
| Ezh1         | 11.31 | 15.33 | 0.44      | 3.06E-01 | no |
| Tbc1d1       | 21.63 | 16.47 | -0.39     | 3.07E-01 | no |
| Pdpx         | 11.22 | 7.41  | -0.60     | 3.07E-01 | no |
| Gm13498      | 19.86 | 14.09 | -0.50     | 3.07E-01 | no |
| Rnf166       | 14.74 | 20.98 | 0.51      | 3.08E-01 | no |
| Tek          | 0.01  | 0.16  | 3.44      | 3.09E-01 | no |
| Rbpms2       | 0.54  | 0.15  | -1.79     | 3.09E-01 | no |
| Gsto2        | 0.18  | 0.67  | 1.92      | 3.09E-01 | no |

|           |       |       |       |          |    |
|-----------|-------|-------|-------|----------|----|
| Stac      | 0.41  | 0.02  | -4.06 | 3.09E-01 | no |
| Prmt5     | 32.74 | 24.64 | -0.41 | 3.09E-01 | no |
| Sh3d19    | 0.76  | 1.33  | 0.81  | 3.10E-01 | no |
| Fam176b   | 2.77  | 4.97  | 0.84  | 3.10E-01 | no |
| Egln3     | 1.90  | 3.31  | 0.80  | 3.10E-01 | no |
| Smc6      | 33.23 | 25.52 | -0.38 | 3.11E-01 | no |
| Inpp1     | 7.21  | 11.10 | 0.62  | 3.11E-01 | no |
| Ung       | 25.81 | 19.00 | -0.44 | 3.11E-01 | no |
| Snrnp35   | 16.65 | 10.76 | -0.63 | 3.12E-01 | no |
| Clcn6     | 6.54  | 9.65  | 0.56  | 3.13E-01 | no |
| Trio      | 3.35  | 4.61  | 0.46  | 3.13E-01 | no |
| Atp1b1    | 63.81 | 83.07 | 0.38  | 3.13E-01 | no |
| Bcr       | 32.30 | 41.94 | 0.38  | 3.13E-01 | no |
| Prim1     | 40.89 | 30.00 | -0.45 | 3.13E-01 | no |
| Il1r1     | 1.19  | 2.07  | 0.81  | 3.13E-01 | no |
| Ppat      | 23.41 | 17.61 | -0.41 | 3.14E-01 | no |
| Klf1      | 0.88  | 0.37  | -1.26 | 3.15E-01 | no |
| Dapk1     | 0.19  | 0.45  | 1.20  | 3.15E-01 | no |
| Rin3      | 24.14 | 30.38 | 0.33  | 3.15E-01 | no |
| Cd1d2     | 9.98  | 15.41 | 0.63  | 3.15E-01 | no |
| Ttc3      | 10.80 | 14.29 | 0.40  | 3.15E-01 | no |
| Trp53inp1 | 74.91 | 93.88 | 0.33  | 3.15E-01 | no |
| Armc7     | 3.63  | 5.85  | 0.69  | 3.15E-01 | no |
| Ccs       | 8.17  | 13.07 | 0.68  | 3.16E-01 | no |
| Gm10863   | 0.64  | 1.71  | 1.41  | 3.17E-01 | no |
| Tmem150b  | 4.13  | 6.79  | 0.72  | 3.17E-01 | no |
| Ric8      | 19.43 | 26.01 | 0.42  | 3.17E-01 | no |
| Tmem205   | 2.47  | 4.74  | 0.94  | 3.18E-01 | no |
| Mib2      | 5.70  | 8.18  | 0.52  | 3.18E-01 | no |
| Pcyox1    | 13.59 | 9.90  | -0.46 | 3.18E-01 | no |
| Sys1      | 26.62 | 18.95 | -0.49 | 3.18E-01 | no |
| Cenph     | 20.37 | 13.65 | -0.58 | 3.18E-01 | no |
| Megf10    | 0.83  | 0.43  | -0.95 | 3.18E-01 | no |
| Osbpl6    | 0.04  | 0.13  | 1.88  | 3.19E-01 | no |
| Lmo2      | 12.41 | 18.00 | 0.54  | 3.19E-01 | no |
| Ppp2r4    | 58.46 | 44.99 | -0.38 | 3.19E-01 | no |
| Zw10      | 28.04 | 20.97 | -0.42 | 3.19E-01 | no |
| Timm8a1   | 46.68 | 33.82 | -0.47 | 3.19E-01 | no |
| Anubl1    | 6.73  | 4.27  | -0.66 | 3.19E-01 | no |
| Zfp78     | 1.51  | 0.84  | -0.84 | 3.19E-01 | no |
| Fam76b    | 31.15 | 23.61 | -0.40 | 3.19E-01 | no |
| Npl       | 0.70  | 1.55  | 1.14  | 3.19E-01 | no |

|               |        |        |       |          |    |
|---------------|--------|--------|-------|----------|----|
| Errfi1        | 0.63   | 0.28   | -1.19 | 3.19E-01 | no |
| Ogdh          | 36.96  | 28.62  | -0.37 | 3.20E-01 | no |
| Cdk2          | 60.41  | 48.42  | -0.32 | 3.20E-01 | no |
| Glb1l         | 6.73   | 9.71   | 0.53  | 3.20E-01 | no |
| Tex9          | 12.59  | 7.98   | -0.66 | 3.20E-01 | no |
| Gm5617        | 2.61   | 5.09   | 0.97  | 3.20E-01 | no |
| Hdgf          | 99.57  | 77.11  | -0.37 | 3.20E-01 | no |
| Arhgap6       | 0.46   | 0.93   | 1.02  | 3.21E-01 | no |
| 1700047117Rik | 10.20  | 13.57  | 0.41  | 3.21E-01 | no |
| Eno3          | 5.19   | 8.35   | 0.69  | 3.21E-01 | no |
| Mier1         | 36.72  | 28.86  | -0.35 | 3.21E-01 | no |
| Fmr1          | 39.56  | 30.45  | -0.38 | 3.21E-01 | no |
| Xlr4b         | 4.61   | 7.79   | 0.76  | 3.22E-01 | no |
| Ptp4a2        | 86.02  | 67.32  | -0.35 | 3.22E-01 | no |
| Endod1        | 33.46  | 25.71  | -0.38 | 3.22E-01 | no |
| Emr4          | 0.27   | 0.08   | -1.83 | 3.22E-01 | no |
| Pbx3          | 0.94   | 0.45   | -1.06 | 3.23E-01 | no |
| Mycbp2        | 16.58  | 21.52  | 0.38  | 3.23E-01 | no |
| Pdik1l        | 16.98  | 12.89  | -0.40 | 3.23E-01 | no |
| Anapc11       | 8.94   | 6.24   | -0.52 | 3.23E-01 | no |
| Zfp93         | 0.24   | 0.53   | 1.12  | 3.23E-01 | no |
| Wnt10b        | 0.57   | 1.20   | 1.07  | 3.23E-01 | no |
| Trim63        | 0.22   | 0.59   | 1.43  | 3.23E-01 | no |
| Rap2a         | 1.68   | 0.96   | -0.82 | 3.23E-01 | no |
| Fbxw10        | 1.14   | 2.00   | 0.81  | 3.23E-01 | no |
| Srsf2         | 143.35 | 111.19 | -0.37 | 3.25E-01 | no |
| Snrpd1        | 52.22  | 37.10  | -0.49 | 3.25E-01 | no |
| C1ql1         | 0.82   | 0.27   | -1.59 | 3.25E-01 | no |
| Atp6v0d1      | 29.56  | 39.88  | 0.43  | 3.25E-01 | no |
| Muc13         | 1.05   | 1.95   | 0.90  | 3.25E-01 | no |
| Lym7          | 2.28   | 1.23   | -0.90 | 3.25E-01 | no |
| Zfyve28       | 0.05   | 0.21   | 1.94  | 3.25E-01 | no |
| Echdc3        | 0.41   | 0.94   | 1.19  | 3.25E-01 | no |
| Fbn1          | 0.17   | 0.33   | 1.01  | 3.25E-01 | no |
| Kctd12        | 52.98  | 40.90  | -0.37 | 3.25E-01 | no |
| Hist3h2a      | 8.93   | 5.64   | -0.66 | 3.25E-01 | no |
| Prss30        | 0.11   | 0.54   | 2.23  | 3.26E-01 | no |
| Gm595         | 1.47   | 2.74   | 0.90  | 3.26E-01 | no |
| Rhoq          | 15.77  | 11.62  | -0.44 | 3.26E-01 | no |
| Tapbp         | 35.09  | 43.96  | 0.33  | 3.26E-01 | no |
| Gfpt1         | 6.55   | 9.04   | 0.47  | 3.26E-01 | no |
| Gtf3c4        | 19.02  | 14.80  | -0.36 | 3.26E-01 | no |

|              |        |       |            |          |    |
|--------------|--------|-------|------------|----------|----|
| Ccni         | 100.07 | 77.56 | -0.37      | 3.26E-01 | no |
| Cab39l       | 18.83  | 13.73 | -0.46      | 3.26E-01 | no |
| Mtbp         | 15.08  | 11.10 | -0.44      | 3.26E-01 | no |
| Tdrd7        | 4.74   | 7.12  | 0.59       | 3.26E-01 | no |
| Gstm7        | 0.55   | 1.28  | 1.21       | 3.27E-01 | no |
| 2310079N02Ri | 9.64   | 14.93 | 0.63       | 3.27E-01 | no |
| 7-Sep        | 63.26  | 48.69 | -0.38      | 3.27E-01 | no |
| 4921517L17Ri | 0.54   | 1.11  | 1.04       | 3.28E-01 | no |
| Eif2s3y      | 7.93   | 12.23 | 0.62       | 3.28E-01 | no |
| Nfic         | 4.16   | 5.80  | 0.48       | 3.28E-01 | no |
| Arrdc1       | 33.10  | 42.79 | 0.37       | 3.28E-01 | no |
| Trhr2        | 0.09   | 0.55  | 2.62       | 3.29E-01 | no |
| Hcrtr2       | 0.08   | 0.00  | -1.79769e- | 3.30E-01 | no |
| Aldh1a2      | 0.09   | 0.00  | -1.79769e- | 3.30E-01 | no |
| Timd2        | 0.08   | 0.00  | -1.79769e- | 3.30E-01 | no |
| Usp50        | 0.12   | 0.00  | -1.79769e- | 3.30E-01 | no |
| Ociad1       | 65.36  | 51.37 | -0.35      | 3.30E-01 | no |
| 5031434O11Ri | 0.33   | 1.34  | 2.01       | 3.30E-01 | no |
| Junb         | 10.79  | 15.61 | 0.53       | 3.30E-01 | no |
| Atp10a       | 8.66   | 11.68 | 0.43       | 3.30E-01 | no |
| Srrm1        | 62.83  | 50.81 | -0.31      | 3.30E-01 | no |
| Plcl1        | 1.14   | 0.66  | -0.80      | 3.31E-01 | no |
| Ptpn11       | 29.60  | 23.95 | -0.31      | 3.31E-01 | no |
| Polr2a       | 76.62  | 59.14 | -0.37      | 3.31E-01 | no |
| Dcbld1       | 1.62   | 0.89  | -0.87      | 3.31E-01 | no |
| Zbtb7b       | 1.26   | 0.69  | -0.88      | 3.31E-01 | no |
| Taf6         | 33.29  | 25.10 | -0.41      | 3.31E-01 | no |
| Tinf2        | 30.94  | 22.68 | -0.45      | 3.31E-01 | no |
| Gnat2        | 0.70   | 0.27  | -1.38      | 3.32E-01 | no |
| Mpv17        | 7.92   | 12.07 | 0.61       | 3.33E-01 | no |
| Plekha4      | 0.09   | 0.28  | 1.69       | 3.33E-01 | no |
| Arrb1        | 6.91   | 9.15  | 0.41       | 3.33E-01 | no |
| Ahsa1        | 66.21  | 50.39 | -0.39      | 3.33E-01 | no |
| Zfp280b      | 15.61  | 11.67 | -0.42      | 3.33E-01 | no |
| Sgpp2        | 0.45   | 0.20  | -1.16      | 3.33E-01 | no |
| Hist2h3c2-ps | 1.01   | 0.33  | -1.59      | 3.33E-01 | no |
| Il12rb2      | 0.21   | 0.50  | 1.23       | 3.33E-01 | no |
| G6pd2        | 4.28   | 2.49  | -0.78      | 3.35E-01 | no |
| 2610020H08Ri | 12.94  | 8.88  | -0.54      | 3.35E-01 | no |
| Ybx2         | 1.51   | 0.73  | -1.04      | 3.35E-01 | no |
| Fem1b        | 29.14  | 22.59 | -0.37      | 3.35E-01 | no |
| Mycbp        | 15.96  | 10.48 | -0.61      | 3.35E-01 | no |

|          |        |        |            |          |    |
|----------|--------|--------|------------|----------|----|
| Gstm3    | 0.39   | 1.05   | 1.42       | 3.35E-01 | no |
| Ube2h    | 24.99  | 31.39  | 0.33       | 3.35E-01 | no |
| Rnf187   | 61.25  | 47.15  | -0.38      | 3.35E-01 | no |
| Mrpl42   | 35.79  | 24.06  | -0.57      | 3.35E-01 | no |
| Ii31ra   | 0.05   | 0.23   | 2.21       | 3.35E-01 | no |
| Trnt1    | 21.45  | 15.35  | -0.48      | 3.36E-01 | no |
| Pglyrp2  | 1.03   | 2.01   | 0.96       | 3.36E-01 | no |
| Phf2     | 41.44  | 32.23  | -0.36      | 3.36E-01 | no |
| Exosc8   | 34.00  | 24.64  | -0.46      | 3.36E-01 | no |
| Pvr      | 2.82   | 4.56   | 0.70       | 3.36E-01 | no |
| Naip5    | 0.97   | 1.67   | 0.78       | 3.37E-01 | no |
| Frmppd1  | 0.04   | 0.00   | -1.79769e- | 3.37E-01 | no |
| Serpinb7 | 0.12   | 0.00   | -1.79769e- | 3.37E-01 | no |
| Jdp2     | 0.95   | 1.86   | 0.97       | 3.37E-01 | no |
| Tbrg1    | 24.85  | 33.76  | 0.44       | 3.37E-01 | no |
| Brd8     | 36.49  | 28.27  | -0.37      | 3.37E-01 | no |
| Brpf1    | 27.11  | 20.90  | -0.37      | 3.37E-01 | no |
| Hnrnpu   | 162.64 | 124.94 | -0.38      | 3.37E-01 | no |
| Nlrc4    | 3.59   | 2.26   | -0.67      | 3.38E-01 | no |
| Zfp280d  | 19.79  | 14.90  | -0.41      | 3.38E-01 | no |
| Irs1     | 2.86   | 1.90   | -0.59      | 3.38E-01 | no |
| Rcan3    | 4.47   | 6.46   | 0.53       | 3.39E-01 | no |
| Rpl28    | 437.27 | 340.28 | -0.36      | 3.39E-01 | no |
| Pias1    | 27.29  | 20.80  | -0.39      | 3.39E-01 | no |
| Pafah1b3 | 70.16  | 52.25  | -0.43      | 3.39E-01 | no |
| Nr2f6    | 5.17   | 3.20   | -0.69      | 3.39E-01 | no |
| Camk1d   | 6.28   | 8.56   | 0.45       | 3.40E-01 | no |
| Naa50    | 51.93  | 40.36  | -0.36      | 3.40E-01 | no |
| Chst11   | 0.51   | 0.25   | -1.02      | 3.40E-01 | no |
| Rnaset2b | 51.74  | 67.51  | 0.38       | 3.40E-01 | no |
| Pxmp2    | 4.04   | 2.18   | -0.89      | 3.40E-01 | no |
| Calm2    | 225.50 | 175.44 | -0.36      | 3.40E-01 | no |
| Pcnx     | 4.03   | 5.43   | 0.43       | 3.40E-01 | no |
| Cpox     | 14.32  | 10.30  | -0.48      | 3.40E-01 | no |
| Tbc1d8   | 0.84   | 1.46   | 0.79       | 3.41E-01 | no |
| Cs       | 62.00  | 48.16  | -0.36      | 3.41E-01 | no |
| Rbm8a    | 24.50  | 18.39  | -0.41      | 3.41E-01 | no |
| Ppp1r2   | 10.49  | 7.40   | -0.50      | 3.41E-01 | no |
| Tigd3    | 4.43   | 2.67   | -0.73      | 3.41E-01 | no |
| Hist1h4m | 2.74   | 0.70   | -1.96      | 3.41E-01 | no |
| Zbtb33   | 22.42  | 17.61  | -0.35      | 3.41E-01 | no |
| Sf3a1    | 38.63  | 30.04  | -0.36      | 3.42E-01 | no |

|              |        |       |           |          |    |
|--------------|--------|-------|-----------|----------|----|
| Cd86         | 0.75   | 1.54  | 1.03      | 3.42E-01 | no |
| Higd1a       | 7.00   | 4.34  | -0.69     | 3.43E-01 | no |
| Rsad1        | 1.83   | 2.97  | 0.70      | 3.43E-01 | no |
| Pgp          | 36.25  | 25.93 | -0.48     | 3.43E-01 | no |
| Dclre1a      | 0.52   | 0.24  | -1.11     | 3.43E-01 | no |
| 5033414D02Ri | 19.69  | 29.20 | 0.57      | 3.43E-01 | no |
| Fpgs         | 13.92  | 19.23 | 0.47      | 3.43E-01 | no |
| Zc3h18       | 34.15  | 27.51 | -0.31     | 3.43E-01 | no |
| Maz          | 123.79 | 96.49 | -0.36     | 3.43E-01 | no |
| Tlk1         | 35.07  | 27.12 | -0.37     | 3.43E-01 | no |
| Bfsp2        | 28.82  | 21.16 | -0.45     | 3.43E-01 | no |
| Gm8909       | 1.59   | 2.98  | 0.91      | 3.44E-01 | no |
| Phlda1       | 4.00   | 2.37  | -0.75     | 3.44E-01 | no |
| Aaas         | 26.64  | 19.42 | -0.46     | 3.44E-01 | no |
| Tor3a        | 10.19  | 14.03 | 0.46      | 3.44E-01 | no |
| Pde1b        | 14.85  | 19.96 | 0.43      | 3.44E-01 | no |
| Unc79        | 0.17   | 0.07  | -1.23     | 3.45E-01 | no |
| Rrp12        | 11.34  | 8.33  | -0.45     | 3.45E-01 | no |
| Stxbp4       | 2.59   | 1.65  | -0.65     | 3.45E-01 | no |
| Btg1         | 50.02  | 38.82 | -0.37     | 3.45E-01 | no |
| U2af1        | 49.09  | 36.44 | -0.43     | 3.45E-01 | no |
| Evpl         | 0.58   | 1.01  | 0.80      | 3.46E-01 | no |
| Spry4        | 0.37   | 0.16  | -1.18     | 3.46E-01 | no |
| Disc1        | 0.00   | 0.08  | 1.79769e+ | 3.46E-01 | no |
| Pip4k2c      | 13.98  | 18.73 | 0.42      | 3.46E-01 | no |
| Irf2bp2      | 30.48  | 39.27 | 0.37      | 3.46E-01 | no |
| Cpsf6        | 56.64  | 44.13 | -0.36     | 3.46E-01 | no |
| Cdca7        | 79.11  | 61.64 | -0.36     | 3.46E-01 | no |
| Usp37        | 15.58  | 11.95 | -0.38     | 3.46E-01 | no |
| Rev1         | 13.08  | 9.67  | -0.44     | 3.46E-01 | no |
| Prrt2        | 2.58   | 1.50  | -0.78     | 3.46E-01 | no |
| Icosl        | 0.56   | 0.24  | -1.24     | 3.46E-01 | no |
| Pik3cg       | 25.95  | 31.36 | 0.27      | 3.46E-01 | no |
| Psmc1        | 39.17  | 30.27 | -0.37     | 3.47E-01 | no |
| Nbeal2       | 7.15   | 9.45  | 0.40      | 3.47E-01 | no |
| 2010204K13Ri | 5.63   | 2.65  | -1.09     | 3.47E-01 | no |
| Pus7         | 13.12  | 9.50  | -0.47     | 3.48E-01 | no |
| Slc25a23     | 7.24   | 4.95  | -0.55     | 3.48E-01 | no |
| Coq2         | 25.66  | 18.55 | -0.47     | 3.50E-01 | no |
| Aven         | 13.16  | 8.75  | -0.59     | 3.50E-01 | no |
| Tubg1        | 29.66  | 21.77 | -0.45     | 3.51E-01 | no |
| Hoxa5        | 1.15   | 2.20  | 0.93      | 3.51E-01 | no |

|              |        |        |           |          |    |
|--------------|--------|--------|-----------|----------|----|
| Smc3         | 43.95  | 34.29  | -0.36     | 3.51E-01 | no |
| Alg6         | 7.43   | 4.88   | -0.61     | 3.51E-01 | no |
| Polr2l       | 14.17  | 9.48   | -0.58     | 3.51E-01 | no |
| Flywch2      | 0.39   | 1.25   | 1.67      | 3.51E-01 | no |
| Tpd52        | 40.62  | 51.07  | 0.33      | 3.52E-01 | no |
| Scamp1       | 1.21   | 2.16   | 0.84      | 3.52E-01 | no |
| Dcakd        | 23.35  | 16.82  | -0.47     | 3.52E-01 | no |
| Klrd1        | 0.89   | 2.25   | 1.33      | 3.52E-01 | no |
| Parp10       | 16.18  | 20.96  | 0.37      | 3.52E-01 | no |
| Eif4g2       | 100.49 | 79.43  | -0.34     | 3.52E-01 | no |
| 3110062M04R  | 5.37   | 7.84   | 0.55      | 3.53E-01 | no |
| Spef1        | 7.80   | 5.08   | -0.62     | 3.53E-01 | no |
| Csk          | 82.90  | 64.78  | -0.36     | 3.54E-01 | no |
| Slc39a10     | 13.48  | 10.02  | -0.43     | 3.54E-01 | no |
| Haus5        | 20.21  | 14.83  | -0.45     | 3.54E-01 | no |
| Marcks       | 45.43  | 35.25  | -0.37     | 3.54E-01 | no |
| Kbtbd7       | 10.59  | 7.63   | -0.47     | 3.54E-01 | no |
| Klhdc5       | 11.17  | 14.68  | 0.39      | 3.54E-01 | no |
| Zfp143       | 15.76  | 11.48  | -0.46     | 3.55E-01 | no |
| Fam55b       | 0.51   | 0.01   | -5.39     | 3.55E-01 | no |
| Enthd1       | 0.11   | 0.40   | 1.81      | 3.55E-01 | no |
| Hip1r        | 21.31  | 27.50  | 0.37      | 3.55E-01 | no |
| Naa10        | 43.99  | 32.65  | -0.43     | 3.55E-01 | no |
| Cc2d1b       | 20.29  | 26.42  | 0.38      | 3.55E-01 | no |
| Raly         | 147.84 | 123.88 | -0.26     | 3.55E-01 | no |
| Sdhaf2       | 24.70  | 18.68  | -0.40     | 3.56E-01 | no |
| Cinp         | 14.00  | 9.60   | -0.54     | 3.57E-01 | no |
| Ppapdc2      | 6.23   | 9.19   | 0.56      | 3.57E-01 | no |
| Kpna3        | 34.45  | 26.66  | -0.37     | 3.57E-01 | no |
| Il2rg        | 29.84  | 39.84  | 0.42      | 3.58E-01 | no |
| Vrk1         | 20.95  | 16.33  | -0.36     | 3.58E-01 | no |
| Ube2t        | 21.01  | 14.11  | -0.57     | 3.58E-01 | no |
| Ftsj1        | 9.10   | 6.34   | -0.52     | 3.58E-01 | no |
| Dnaja4       | 0.28   | 0.60   | 1.10      | 3.58E-01 | no |
| Trmt2a       | 28.06  | 22.22  | -0.34     | 3.58E-01 | no |
| Art1         | 0.10   | 0.51   | 2.39      | 3.59E-01 | no |
| Erbp3        | 1.15   | 1.93   | 0.74      | 3.59E-01 | no |
| H2-T23       | 34.32  | 45.76  | 0.41      | 3.59E-01 | no |
| 4930567H12Ri | 0.00   | 0.20   | 1.79769e+ | 3.60E-01 | no |
| Ascl2        | 0.00   | 0.13   | 1.79769e+ | 3.60E-01 | no |
| Btbd16       | 0.00   | 0.06   | 1.79769e+ | 3.60E-01 | no |
| C4bp-ps1     | 0.00   | 0.27   | 1.79769e+ | 3.60E-01 | no |



|               |        |        |            |          |    |
|---------------|--------|--------|------------|----------|----|
| Ccdc136       | 0.00   | 0.04   | 1.79769e+  | 3.60E-01 | no |
| Cd209c        | 0.00   | 0.15   | 1.79769e+  | 3.60E-01 | no |
| Clec4b2       | 0.00   | 0.24   | 1.79769e+  | 3.60E-01 | no |
| Cmb1          | 0.00   | 0.22   | 1.79769e+  | 3.60E-01 | no |
| Crispld1      | 0.00   | 0.07   | 1.79769e+  | 3.60E-01 | no |
| Dpp10         | 0.00   | 0.06   | 1.79769e+  | 3.60E-01 | no |
| Gm8787        | 0.00   | 0.20   | 1.79769e+  | 3.60E-01 | no |
| Gpr45         | 0.00   | 0.06   | 1.79769e+  | 3.60E-01 | no |
| Hpca          | 0.00   | 0.12   | 1.79769e+  | 3.60E-01 | no |
| Lrp2          | 0.00   | 0.01   | 1.79769e+  | 3.60E-01 | no |
| Pard3         | 0.00   | 0.03   | 1.79769e+  | 3.60E-01 | no |
| Zfp462        | 0.00   | 0.02   | 1.79769e+  | 3.60E-01 | no |
| Lrrc66        | 0.08   | 0.00   | -1.79769e- | 3.60E-01 | no |
| Pdcd1lg2      | 0.10   | 0.32   | 1.63       | 3.60E-01 | no |
| Stac3         | 0.62   | 1.26   | 1.03       | 3.60E-01 | no |
| Il15          | 1.56   | 3.09   | 0.99       | 3.60E-01 | no |
| Dmd           | 0.14   | 0.27   | 0.92       | 3.60E-01 | no |
| Fahd2a        | 5.55   | 8.96   | 0.69       | 3.60E-01 | no |
| Oas1a         | 8.95   | 13.09  | 0.55       | 3.60E-01 | no |
| Slc27a1       | 11.75  | 16.05  | 0.45       | 3.60E-01 | no |
| Maml3         | 6.07   | 8.20   | 0.43       | 3.60E-01 | no |
| Ifi47         | 30.23  | 40.37  | 0.42       | 3.60E-01 | no |
| Mcm6          | 93.37  | 73.18  | -0.35      | 3.60E-01 | no |
| C2cd3         | 24.56  | 19.22  | -0.35      | 3.60E-01 | no |
| Pou2af1       | 186.54 | 145.45 | -0.36      | 3.60E-01 | no |
| Wbp11         | 50.85  | 39.61  | -0.36      | 3.60E-01 | no |
| Eif2s2        | 55.18  | 42.80  | -0.37      | 3.60E-01 | no |
| Eef1g         | 362.19 | 280.84 | -0.37      | 3.60E-01 | no |
| Ncl           | 78.25  | 60.57  | -0.37      | 3.60E-01 | no |
| 0610007L01Ril | 20.60  | 15.61  | -0.40      | 3.60E-01 | no |
| Ube2g1        | 20.38  | 15.31  | -0.41      | 3.60E-01 | no |
| Recql         | 24.04  | 18.05  | -0.41      | 3.60E-01 | no |
| Wdr18         | 18.43  | 13.72  | -0.43      | 3.60E-01 | no |
| Tmem206       | 13.24  | 9.79   | -0.44      | 3.60E-01 | no |
| D030056L22Ri  | 24.44  | 17.49  | -0.48      | 3.60E-01 | no |
| Tmem173       | 13.72  | 9.58   | -0.52      | 3.60E-01 | no |
| Abhd14a       | 9.89   | 6.39   | -0.63      | 3.60E-01 | no |
| Dmc1          | 1.12   | 0.55   | -1.03      | 3.60E-01 | no |
| Emid2         | 0.31   | 0.10   | -1.56      | 3.60E-01 | no |
| Fcer2a        | 0.45   | 0.03   | -3.87      | 3.60E-01 | no |
| Tnfrsf23      | 0.43   | 0.88   | 1.02       | 3.60E-01 | no |
| Cbx3          | 52.13  | 39.68  | -0.39      | 3.60E-01 | no |

|              |        |       |            |          |    |
|--------------|--------|-------|------------|----------|----|
| Gxylt1       | 12.80  | 9.71  | -0.40      | 3.60E-01 | no |
| Paqr7        | 1.53   | 2.73  | 0.83       | 3.60E-01 | no |
| Dscam        | 0.03   | 0.11  | 1.93       | 3.60E-01 | no |
| Rab33a       | 0.54   | 1.28  | 1.25       | 3.60E-01 | no |
| Gabarap      | 56.85  | 74.61 | 0.39       | 3.60E-01 | no |
| Ikzf5        | 17.60  | 13.24 | -0.41      | 3.60E-01 | no |
| Btbd3        | 1.25   | 2.12  | 0.76       | 3.61E-01 | no |
| D930020B18Ri | 0.00   | 0.06  | 1.79769e+  | 3.61E-01 | no |
| Immt         | 40.04  | 31.04 | -0.37      | 3.62E-01 | no |
| Rab11b       | 32.34  | 25.29 | -0.35      | 3.62E-01 | no |
| Dtx1         | 3.38   | 2.08  | -0.70      | 3.62E-01 | no |
| Scrg1        | 0.00   | 0.30  | 1.79769e+  | 3.62E-01 | no |
| Strc         | 0.00   | 0.02  | 1.79769e+  | 3.62E-01 | no |
| Zfp9         | 0.06   | 0.00  | -1.79769e- | 3.62E-01 | no |
| Acadsb       | 3.87   | 5.95  | 0.62       | 3.62E-01 | no |
| Vbp1         | 49.00  | 36.78 | -0.41      | 3.62E-01 | no |
| Exoc3l       | 1.98   | 3.27  | 0.72       | 3.62E-01 | no |
| Pi4ka        | 28.26  | 22.09 | -0.36      | 3.62E-01 | no |
| B3gnt6       | 0.00   | 0.09  | 1.79769e+  | 3.63E-01 | no |
| Pparg        | 0.00   | 0.12  | 1.79769e+  | 3.63E-01 | no |
| Nid1         | 0.44   | 0.82  | 0.90       | 3.63E-01 | no |
| Dock10       | 29.05  | 37.29 | 0.36       | 3.63E-01 | no |
| Atp1b3       | 121.55 | 94.89 | -0.36      | 3.63E-01 | no |
| Abce1        | 42.66  | 33.29 | -0.36      | 3.63E-01 | no |
| 2610027L16Ri | 18.43  | 13.98 | -0.40      | 3.63E-01 | no |
| St5          | 0.68   | 0.28  | -1.26      | 3.63E-01 | no |
| Atic         | 45.70  | 35.46 | -0.37      | 3.63E-01 | no |
| Gnptg        | 8.86   | 13.44 | 0.60       | 3.63E-01 | no |
| Scaper       | 2.99   | 4.43  | 0.57       | 3.64E-01 | no |
| Trim28       | 85.48  | 67.15 | -0.35      | 3.64E-01 | no |
| Tax1bp1      | 47.31  | 36.92 | -0.36      | 3.64E-01 | no |
| Brcc3        | 19.92  | 14.73 | -0.44      | 3.64E-01 | no |
| Emp1         | 22.91  | 30.95 | 0.43       | 3.65E-01 | no |
| Ifrd2        | 25.48  | 18.83 | -0.44      | 3.65E-01 | no |
| Sft2d2       | 38.17  | 48.96 | 0.36       | 3.65E-01 | no |
| Sec23b       | 27.06  | 20.56 | -0.40      | 3.65E-01 | no |
| Poc1b        | 19.11  | 14.06 | -0.44      | 3.66E-01 | no |
| Cdc42bpa     | 2.67   | 1.80  | -0.57      | 3.66E-01 | no |
| Relb         | 6.07   | 9.01  | 0.57       | 3.66E-01 | no |
| Dnajb14      | 0.86   | 1.66  | 0.94       | 3.66E-01 | no |
| Rcor2        | 13.58  | 9.46  | -0.52      | 3.66E-01 | no |
| Rprd1b       | 31.67  | 24.47 | -0.37      | 3.66E-01 | no |

|              |       |       |            |          |    |
|--------------|-------|-------|------------|----------|----|
| Gpr137b-ps   | 5.47  | 8.13  | 0.57       | 3.68E-01 | no |
| Crtc3        | 8.05  | 10.74 | 0.42       | 3.68E-01 | no |
| Mypop        | 1.34  | 2.33  | 0.80       | 3.68E-01 | no |
| Zfp951       | 3.29  | 5.20  | 0.66       | 3.68E-01 | no |
| Rsrc2        | 45.99 | 37.33 | -0.30      | 3.68E-01 | no |
| Eef1d        | 61.22 | 47.92 | -0.35      | 3.69E-01 | no |
| Selenbp2     | 1.40  | 2.52  | 0.85       | 3.69E-01 | no |
| Alg8         | 20.93 | 14.99 | -0.48      | 3.69E-01 | no |
| Tg           | 0.03  | 0.10  | 1.85       | 3.69E-01 | no |
| Scarb1       | 29.30 | 22.31 | -0.39      | 3.69E-01 | no |
| Dgka         | 30.15 | 39.15 | 0.38       | 3.69E-01 | no |
| Calu         | 41.16 | 33.28 | -0.31      | 3.69E-01 | no |
| Fam195a      | 6.05  | 3.46  | -0.81      | 3.69E-01 | no |
| H2-t9        | 0.19  | 0.76  | 1.98       | 3.70E-01 | no |
| Gm6402       | 96.49 | 75.02 | -0.36      | 3.70E-01 | no |
| Hist1h4i     | 17.85 | 11.02 | -0.70      | 3.70E-01 | no |
| 6030468B19Ri | 0.19  | 0.00  | -1.79769e- | 3.70E-01 | no |
| Gys2         | 0.08  | 0.00  | -1.79769e- | 3.70E-01 | no |
| Sftpb        | 0.11  | 0.00  | -1.79769e- | 3.70E-01 | no |
| Stoml3       | 0.25  | 0.00  | -1.79769e- | 3.70E-01 | no |
| Nav2         | 3.42  | 2.51  | -0.45      | 3.71E-01 | no |
| A630033H20R  | 6.89  | 4.55  | -0.60      | 3.71E-01 | no |
| Chst14       | 2.95  | 4.76  | 0.69       | 3.71E-01 | no |
| Pelo         | 14.73 | 10.10 | -0.55      | 3.71E-01 | no |
| Fbxo45       | 17.50 | 13.20 | -0.41      | 3.71E-01 | no |
| Slc22a5      | 7.60  | 10.79 | 0.51       | 3.71E-01 | no |
| Naaa         | 2.41  | 1.35  | -0.83      | 3.71E-01 | no |
| Ninj1        | 24.13 | 33.29 | 0.46       | 3.72E-01 | no |
| Baz1b        | 60.83 | 47.69 | -0.35      | 3.72E-01 | no |
| Rasl2-9-ps   | 22.26 | 15.11 | -0.56      | 3.72E-01 | no |
| Dusp2        | 41.36 | 53.78 | 0.38       | 3.72E-01 | no |
| Taf15        | 50.35 | 39.04 | -0.37      | 3.72E-01 | no |
| Deaf1        | 13.07 | 9.36  | -0.48      | 3.72E-01 | no |
| Ccl22        | 0.30  | 0.04  | -2.85      | 3.73E-01 | no |
| Trim3        | 2.34  | 3.74  | 0.67       | 3.73E-01 | no |
| Slc25a24     | 3.77  | 5.79  | 0.62       | 3.73E-01 | no |
| ldh3g        | 54.50 | 41.54 | -0.39      | 3.73E-01 | no |
| Cct6a        | 67.46 | 52.75 | -0.35      | 3.74E-01 | no |
| Tbx19        | 0.69  | 0.33  | -1.06      | 3.74E-01 | no |
| Fkbp2        | 30.72 | 21.26 | -0.53      | 3.74E-01 | no |
| Tnfaip1      | 9.14  | 6.56  | -0.48      | 3.74E-01 | no |
| 1110018J18Ri | 10.32 | 6.38  | -0.69      | 3.74E-01 | no |

|               |       |       |           |          |    |
|---------------|-------|-------|-----------|----------|----|
| Pls3          | 1.17  | 2.10  | 0.84      | 3.74E-01 | no |
| Cdkn3         | 25.51 | 17.07 | -0.58     | 3.74E-01 | no |
| Mipep         | 9.26  | 6.28  | -0.56     | 3.75E-01 | no |
| E130309D02Ri  | 29.67 | 22.58 | -0.39     | 3.75E-01 | no |
| Itga4         | 48.76 | 38.10 | -0.36     | 3.75E-01 | no |
| Al662270      | 70.12 | 53.93 | -0.38     | 3.76E-01 | no |
| Tnfrsf13b     | 18.29 | 11.87 | -0.62     | 3.76E-01 | no |
| Med1          | 41.08 | 34.37 | -0.26     | 3.76E-01 | no |
| Pak4          | 10.59 | 7.55  | -0.49     | 3.76E-01 | no |
| Depdc7        | 0.78  | 1.54  | 0.98      | 3.76E-01 | no |
| Atp8a1        | 20.80 | 16.64 | -0.32     | 3.76E-01 | no |
| Izumo4        | 3.86  | 6.56  | 0.76      | 3.77E-01 | no |
| Slc9a2        | 0.10  | 0.30  | 1.57      | 3.77E-01 | no |
| Wnt5b         | 0.08  | 0.26  | 1.77      | 3.77E-01 | no |
| Lag3          | 0.18  | 0.51  | 1.53      | 3.77E-01 | no |
| C230096C10Ri  | 12.69 | 9.85  | -0.37     | 3.77E-01 | no |
| Tomm40        | 37.33 | 28.69 | -0.38     | 3.77E-01 | no |
| Nqo2          | 5.28  | 3.47  | -0.60     | 3.78E-01 | no |
| Ctso          | 9.87  | 13.64 | 0.47      | 3.79E-01 | no |
| Fas           | 1.01  | 2.12  | 1.07      | 3.79E-01 | no |
| Chpf2         | 10.42 | 13.97 | 0.42      | 3.79E-01 | no |
| Actl6a        | 38.74 | 29.61 | -0.39     | 3.79E-01 | no |
| Cyb561d1      | 13.49 | 10.22 | -0.40     | 3.79E-01 | no |
| Cacna1i       | 1.35  | 0.87  | -0.63     | 3.79E-01 | no |
| Psors1c2      | 0.74  | 0.18  | -2.08     | 3.79E-01 | no |
| Rab11fip2     | 4.81  | 6.65  | 0.47      | 3.79E-01 | no |
| Man2b1        | 17.85 | 23.06 | 0.37      | 3.79E-01 | no |
| Prmt7         | 19.15 | 14.04 | -0.45     | 3.79E-01 | no |
| Ccng2         | 54.90 | 42.82 | -0.36     | 3.80E-01 | no |
| Phb           | 29.70 | 22.24 | -0.42     | 3.80E-01 | no |
| Zfp551        | 1.30  | 2.26  | 0.81      | 3.80E-01 | no |
| Kctd7         | 3.73  | 2.43  | -0.62     | 3.81E-01 | no |
| Elk1          | 5.55  | 7.95  | 0.52      | 3.81E-01 | no |
| Slc12a9       | 7.70  | 10.71 | 0.48      | 3.81E-01 | no |
| 8430406I07Rik | 7.23  | 4.83  | -0.58     | 3.81E-01 | no |
| A330040F15Ri  | 1.18  | 0.51  | -1.22     | 3.81E-01 | no |
| Setmar        | 1.47  | 2.64  | 0.85      | 3.82E-01 | no |
| Sestd1        | 1.33  | 0.75  | -0.83     | 3.82E-01 | no |
| Tsnaxip1      | 0.23  | 0.03  | -2.80     | 3.82E-01 | no |
| 2410018L13Ril | 0.00  | 0.13  | 1.79769e+ | 3.83E-01 | no |
| Bmyc          | 6.26  | 10.24 | 0.71      | 3.83E-01 | no |
| Usp32         | 7.17  | 9.50  | 0.41      | 3.83E-01 | no |

|              |        |       |           |          |    |
|--------------|--------|-------|-----------|----------|----|
| Hsp90b1      | 101.15 | 79.84 | -0.34     | 3.84E-01 | no |
| Nudcd2       | 29.23  | 21.49 | -0.44     | 3.84E-01 | no |
| Rnase6       | 7.89   | 4.70  | -0.75     | 3.84E-01 | no |
| 1700039E15Ri | 0.00   | 0.11  | 1.79769e+ | 3.84E-01 | no |
| Atp6v0e2     | 0.00   | 0.10  | 1.79769e+ | 3.84E-01 | no |
| Col15a1      | 0.00   | 0.03  | 1.79769e+ | 3.84E-01 | no |
| Kcnu1        | 0.00   | 0.05  | 1.79769e+ | 3.84E-01 | no |
| Klhdc7b      | 0.00   | 0.09  | 1.79769e+ | 3.84E-01 | no |
| Vgf          | 0.00   | 0.06  | 1.79769e+ | 3.84E-01 | no |
| Cd1d1        | 25.11  | 33.30 | 0.41      | 3.84E-01 | no |
| Ophn1        | 0.26   | 0.53  | 1.05      | 3.85E-01 | no |
| Plekho2      | 20.74  | 26.92 | 0.38      | 3.85E-01 | no |
| Ildr1        | 0.90   | 1.62  | 0.86      | 3.85E-01 | no |
| Ispd         | 0.39   | 0.80  | 1.04      | 3.85E-01 | no |
| Slc35f5      | 3.00   | 4.80  | 0.68      | 3.85E-01 | no |
| Clic4        | 48.46  | 61.53 | 0.34      | 3.85E-01 | no |
| Ctsa         | 19.77  | 24.76 | 0.32      | 3.85E-01 | no |
| Zfp809       | 17.72  | 12.94 | -0.45     | 3.85E-01 | no |
| Asb14        | 0.00   | 0.09  | 1.79769e+ | 3.85E-01 | no |
| Atp5g1       | 70.84  | 54.16 | -0.39     | 3.85E-01 | no |
| Mrpl51       | 34.46  | 25.48 | -0.44     | 3.86E-01 | no |
| Sema5a       | 0.07   | 0.01  | -2.59     | 3.86E-01 | no |
| Pola2        | 38.72  | 30.58 | -0.34     | 3.86E-01 | no |
| Sirpa        | 4.99   | 7.01  | 0.49      | 3.87E-01 | no |
| Nsmce1       | 31.94  | 22.97 | -0.48     | 3.87E-01 | no |
| Nov          | 0.00   | 0.08  | 1.79769e+ | 3.87E-01 | no |
| Olah         | 0.00   | 0.13  | 1.79769e+ | 3.87E-01 | no |
| Sh2d1b1      | 0.00   | 0.13  | 1.79769e+ | 3.87E-01 | no |
| Tmie         | 0.00   | 0.07  | 1.79769e+ | 3.87E-01 | no |
| Kank1        | 0.07   | 0.18  | 1.40      | 3.87E-01 | no |
| Atp2b1       | 17.04  | 13.28 | -0.36     | 3.87E-01 | no |
| Msl3l2       | 2.49   | 4.05  | 0.70      | 3.87E-01 | no |
| Ak2          | 82.34  | 66.04 | -0.32     | 3.87E-01 | no |
| Zc3h12b      | 0.52   | 0.97  | 0.91      | 3.88E-01 | no |
| Api5         | 61.75  | 48.76 | -0.34     | 3.88E-01 | no |
| Ms4a3        | 1.07   | 0.37  | -1.54     | 3.88E-01 | no |
| Nudt16       | 7.54   | 11.27 | 0.58      | 3.88E-01 | no |
| Hnrnpr       | 70.06  | 55.18 | -0.34     | 3.88E-01 | no |
| Tmem107      | 8.54   | 5.28  | -0.69     | 3.88E-01 | no |
| Asprv1       | 0.23   | 0.62  | 1.43      | 3.89E-01 | no |
| Camk1g       | 1.95   | 3.26  | 0.74      | 3.89E-01 | no |
| Anp32a       | 70.58  | 55.48 | -0.35     | 3.89E-01 | no |

|              |        |        |           |          |    |
|--------------|--------|--------|-----------|----------|----|
| Mapt         | 0.13   | 0.35   | 1.46      | 3.89E-01 | no |
| Mfsd9        | 0.56   | 1.05   | 0.90      | 3.89E-01 | no |
| Sardh        | 0.03   | 0.23   | 3.21      | 3.89E-01 | no |
| BC017643     | 47.68  | 60.74  | 0.35      | 3.89E-01 | no |
| Snrpd2       | 132.19 | 100.78 | -0.39     | 3.89E-01 | no |
| Pds5a        | 63.29  | 50.02  | -0.34     | 3.89E-01 | no |
| D430020J02Ri | 13.23  | 9.52   | -0.48     | 3.89E-01 | no |
| Rab37        | 6.71   | 4.34   | -0.63     | 3.90E-01 | no |
| Rab3il1      | 1.24   | 2.17   | 0.80      | 3.90E-01 | no |
| Atp6v0b      | 30.34  | 41.54  | 0.45      | 3.90E-01 | no |
| Cutc         | 10.70  | 7.04   | -0.60     | 3.90E-01 | no |
| Naa16        | 13.03  | 9.59   | -0.44     | 3.90E-01 | no |
| Mmachc       | 9.64   | 6.41   | -0.59     | 3.90E-01 | no |
| Sema3g       | 1.44   | 0.80   | -0.84     | 3.90E-01 | no |
| Otud6b       | 18.04  | 13.49  | -0.42     | 3.90E-01 | no |
| Boll         | 0.16   | 1.48   | 3.18      | 3.91E-01 | no |
| Ezh2         | 103.73 | 83.78  | -0.31     | 3.91E-01 | no |
| Slc30a4      | 20.00  | 15.51  | -0.37     | 3.91E-01 | no |
| Cyp11b1      | 0.01   | 0.91   | 6.00      | 3.91E-01 | no |
| Socs7        | 10.86  | 8.35   | -0.38     | 3.92E-01 | no |
| Hesx1        | 0.86   | 0.33   | -1.38     | 3.92E-01 | no |
| Opa1         | 20.02  | 16.10  | -0.31     | 3.93E-01 | no |
| lars         | 31.00  | 24.35  | -0.35     | 3.93E-01 | no |
| Slc12a4      | 6.23   | 4.30   | -0.53     | 3.93E-01 | no |
| Wtap         | 60.73  | 50.44  | -0.27     | 3.93E-01 | no |
| Ilf2         | 42.12  | 32.42  | -0.38     | 3.93E-01 | no |
| Pcnx12       | 0.03   | 0.11   | 1.67      | 3.94E-01 | no |
| Cyb5r4       | 25.01  | 18.90  | -0.40     | 3.94E-01 | no |
| Il13ra1      | 0.13   | 0.34   | 1.38      | 3.95E-01 | no |
| Eftud2       | 44.76  | 36.27  | -0.30     | 3.95E-01 | no |
| Myst2        | 25.33  | 20.21  | -0.33     | 3.95E-01 | no |
| Mmrn1        | 15.01  | 11.55  | -0.38     | 3.95E-01 | no |
| Thoc3        | 29.62  | 22.66  | -0.39     | 3.95E-01 | no |
| Gm5065       | 0.00   | 0.02   | 1.79769e+ | 3.96E-01 | no |
| 2010110P09Ri | 0.00   | 0.12   | 1.79769e+ | 3.96E-01 | no |
| Barhl1       | 0.00   | 0.04   | 1.79769e+ | 3.96E-01 | no |
| C1qtnf9      | 0.00   | 0.07   | 1.79769e+ | 3.96E-01 | no |
| Fam178b      | 0.00   | 0.09   | 1.79769e+ | 3.96E-01 | no |
| Gm3696       | 0.00   | 0.07   | 1.79769e+ | 3.96E-01 | no |
| Vaultrc5     | 0.00   | 0.48   | 1.79769e+ | 3.96E-01 | no |
| 1700001K23Ri | 0.00   | 0.33   | 1.79769e+ | 3.96E-01 | no |
| 1700007K09Ri | 0.00   | 0.23   | 1.79769e+ | 3.96E-01 | no |

|              |      |      |            |          |    |
|--------------|------|------|------------|----------|----|
| 4930590J08Ri | 0.00 | 0.04 | 1.79769e+  | 3.96E-01 | no |
| 4932435O22Ri | 0.00 | 0.04 | 1.79769e+  | 3.96E-01 | no |
| 4933433C11Ri | 0.00 | 0.10 | 1.79769e+  | 3.96E-01 | no |
| Car11        | 0.00 | 0.10 | 1.79769e+  | 3.96E-01 | no |
| Ccdc42       | 0.00 | 0.11 | 1.79769e+  | 3.96E-01 | no |
| Cygb         | 0.00 | 0.06 | 1.79769e+  | 3.96E-01 | no |
| Dfnb59       | 0.00 | 0.12 | 1.79769e+  | 3.96E-01 | no |
| Drd1a        | 0.00 | 0.04 | 1.79769e+  | 3.96E-01 | no |
| Fam107a      | 0.00 | 0.05 | 1.79769e+  | 3.96E-01 | no |
| Frem2        | 0.00 | 0.01 | 1.79769e+  | 3.96E-01 | no |
| Ghr          | 0.00 | 0.04 | 1.79769e+  | 3.96E-01 | no |
| Gm1027       | 0.00 | 0.03 | 1.79769e+  | 3.96E-01 | no |
| Gm5126       | 0.00 | 0.07 | 1.79769e+  | 3.96E-01 | no |
| Khdrbs2      | 0.00 | 0.11 | 1.79769e+  | 3.96E-01 | no |
| Leap2        | 0.00 | 0.32 | 1.79769e+  | 3.96E-01 | no |
| Lmx1b        | 0.00 | 0.12 | 1.79769e+  | 3.96E-01 | no |
| Lrat         | 0.00 | 0.03 | 1.79769e+  | 3.96E-01 | no |
| Nlrp4c       | 0.00 | 0.04 | 1.79769e+  | 3.96E-01 | no |
| Nos1         | 0.00 | 0.03 | 1.79769e+  | 3.96E-01 | no |
| Patl2        | 0.00 | 0.06 | 1.79769e+  | 3.96E-01 | no |
| Pebp4        | 0.00 | 0.15 | 1.79769e+  | 3.96E-01 | no |
| Pgc          | 0.00 | 0.11 | 1.79769e+  | 3.96E-01 | no |
| Pirt         | 0.00 | 0.05 | 1.79769e+  | 3.96E-01 | no |
| Ppp2r2c      | 0.00 | 0.04 | 1.79769e+  | 3.96E-01 | no |
| Ptprk        | 0.00 | 0.02 | 1.79769e+  | 3.96E-01 | no |
| Scg2         | 0.00 | 0.06 | 1.79769e+  | 3.96E-01 | no |
| She          | 0.00 | 0.03 | 1.79769e+  | 3.96E-01 | no |
| Styxl1       | 0.00 | 0.09 | 1.79769e+  | 3.96E-01 | no |
| Ugt8a        | 0.00 | 0.04 | 1.79769e+  | 3.96E-01 | no |
| Wnt8b        | 0.00 | 0.04 | 1.79769e+  | 3.96E-01 | no |
| Zfp711       | 0.00 | 0.03 | 1.79769e+  | 3.96E-01 | no |
| Col25a1      | 0.05 | 0.00 | -1.79769e- | 3.96E-01 | no |
| Tshb         | 0.38 | 0.00 | -1.79769e- | 3.96E-01 | no |
| Kctd15       | 0.03 | 0.31 | 3.18       | 3.96E-01 | no |
| Dyrk4        | 0.12 | 0.39 | 1.73       | 3.96E-01 | no |
| Rap1gap      | 0.25 | 0.52 | 1.03       | 3.96E-01 | no |
| Zfp931       | 0.68 | 1.37 | 1.01       | 3.96E-01 | no |
| Cxx1c        | 2.00 | 3.62 | 0.86       | 3.96E-01 | no |
| Angpt1       | 0.61 | 1.09 | 0.84       | 3.96E-01 | no |
| Fbxw9        | 3.75 | 5.88 | 0.65       | 3.96E-01 | no |
| Oas1g        | 3.88 | 6.08 | 0.65       | 3.96E-01 | no |
| Fbxl4        | 4.27 | 6.52 | 0.61       | 3.96E-01 | no |

|              |         |         |       |          |    |
|--------------|---------|---------|-------|----------|----|
| Mafg         | 5.91    | 8.97    | 0.60  | 3.96E-01 | no |
| 2510002D24Ri | 11.29   | 16.42   | 0.54  | 3.96E-01 | no |
| Dhx58        | 7.35    | 10.43   | 0.51  | 3.96E-01 | no |
| Zfp53        | 8.23    | 11.51   | 0.48  | 3.96E-01 | no |
| A230050P20Ri | 11.89   | 16.60   | 0.48  | 3.96E-01 | no |
| Herc3        | 5.88    | 8.13    | 0.47  | 3.96E-01 | no |
| Rras2        | 23.09   | 30.60   | 0.41  | 3.96E-01 | no |
| Ctnnb1       | 91.25   | 76.53   | -0.25 | 3.96E-01 | no |
| Dgkz         | 65.27   | 54.01   | -0.27 | 3.96E-01 | no |
| Creb1        | 32.21   | 26.19   | -0.30 | 3.96E-01 | no |
| Clasp2       | 18.24   | 14.50   | -0.33 | 3.96E-01 | no |
| Fubp1        | 46.80   | 37.05   | -0.34 | 3.96E-01 | no |
| Fam38a       | 16.48   | 12.98   | -0.34 | 3.96E-01 | no |
| Hspa8        | 286.09  | 224.15  | -0.35 | 3.96E-01 | no |
| Man1b1       | 28.77   | 22.50   | -0.36 | 3.96E-01 | no |
| Polr1a       | 15.16   | 11.83   | -0.36 | 3.96E-01 | no |
| Manea        | 20.65   | 15.93   | -0.37 | 3.96E-01 | no |
| Rpl7l1       | 30.23   | 23.31   | -0.38 | 3.96E-01 | no |
| Psmc4        | 48.09   | 37.05   | -0.38 | 3.96E-01 | no |
| Zmat2        | 32.98   | 25.21   | -0.39 | 3.96E-01 | no |
| Cops4        | 35.07   | 26.63   | -0.40 | 3.96E-01 | no |
| Cops3        | 42.48   | 32.26   | -0.40 | 3.96E-01 | no |
| Mrpl18       | 61.65   | 46.69   | -0.40 | 3.96E-01 | no |
| Ost4         | 83.41   | 62.42   | -0.42 | 3.96E-01 | no |
| Katnb1       | 13.53   | 10.06   | -0.43 | 3.96E-01 | no |
| Phlpp2       | 6.06    | 4.50    | -0.43 | 3.96E-01 | no |
| Prpf38a      | 26.95   | 19.71   | -0.45 | 3.96E-01 | no |
| Ptma         | 1995.60 | 1435.34 | -0.48 | 3.96E-01 | no |
| Ppa2         | 15.23   | 10.21   | -0.58 | 3.96E-01 | no |
| Appl2        | 5.24    | 3.44    | -0.61 | 3.96E-01 | no |
| Ptplb        | 4.43    | 2.89    | -0.62 | 3.96E-01 | no |
| Hpdl         | 0.66    | 0.27    | -1.28 | 3.96E-01 | no |
| Fgd5         | 0.19    | 0.08    | -1.29 | 3.96E-01 | no |
| Dclre1c      | 15.16   | 19.20   | 0.34  | 3.96E-01 | no |
| Exog         | 6.06    | 4.23    | -0.52 | 3.96E-01 | no |
| Rras         | 1.60    | 2.97    | 0.89  | 3.98E-01 | no |
| Necab3       | 2.06    | 1.16    | -0.83 | 3.98E-01 | no |
| Padi1        | 0.29    | 0.56    | 0.97  | 3.98E-01 | no |
| 1700029F09Ri | 29.82   | 21.47   | -0.47 | 3.98E-01 | no |
| Cd274        | 1.89    | 3.04    | 0.68  | 3.98E-01 | no |
| Eaf1         | 27.87   | 21.85   | -0.35 | 3.99E-01 | no |
| Stat5a       | 17.52   | 22.25   | 0.34  | 3.99E-01 | no |



|              |       |       |           |          |    |
|--------------|-------|-------|-----------|----------|----|
| Zfp455       | 2.56  | 4.15  | 0.70      | 4.00E-01 | no |
| Xrcc3        | 18.40 | 13.69 | -0.43     | 4.00E-01 | no |
| Lrguk        | 0.63  | 0.30  | -1.07     | 4.00E-01 | no |
| Uba3         | 24.47 | 18.69 | -0.39     | 4.00E-01 | no |
| Gria3        | 0.64  | 1.15  | 0.83      | 4.01E-01 | no |
| Rngtt        | 11.90 | 8.79  | -0.44     | 4.01E-01 | no |
| Gtf2a2       | 41.39 | 29.70 | -0.48     | 4.02E-01 | no |
| Cdca4        | 47.32 | 37.15 | -0.35     | 4.03E-01 | no |
| Klf13        | 30.60 | 24.21 | -0.34     | 4.04E-01 | no |
| 3830406C13Ri | 8.44  | 12.03 | 0.51      | 4.04E-01 | no |
| Bcl9l        | 9.42  | 12.33 | 0.39      | 4.04E-01 | no |
| Casc4        | 7.89  | 5.70  | -0.47     | 4.04E-01 | no |
| Ldoc1l       | 15.70 | 12.07 | -0.38     | 4.04E-01 | no |
| Tbrg4        | 32.37 | 25.96 | -0.32     | 4.05E-01 | no |
| Slc35a4      | 50.91 | 40.73 | -0.32     | 4.05E-01 | no |
| Cep72        | 10.69 | 7.79  | -0.46     | 4.05E-01 | no |
| Tbc1d22a     | 8.17  | 11.14 | 0.45      | 4.06E-01 | no |
| Flnb         | 3.69  | 4.93  | 0.42      | 4.06E-01 | no |
| Abcb7        | 21.60 | 16.92 | -0.35     | 4.06E-01 | no |
| Acp1         | 11.13 | 8.11  | -0.46     | 4.06E-01 | no |
| Ccdc146      | 0.21  | 0.04  | -2.34     | 4.06E-01 | no |
| Al182371     | 0.54  | 0.18  | -1.59     | 4.06E-01 | no |
| Ankrd37      | 2.42  | 1.27  | -0.94     | 4.07E-01 | no |
| Man1c1       | 0.59  | 1.03  | 0.80      | 4.07E-01 | no |
| Tmem185b     | 10.57 | 14.92 | 0.50      | 4.07E-01 | no |
| Cldn15       | 0.41  | 0.11  | -1.85     | 4.07E-01 | no |
| Arrdc2       | 3.38  | 5.23  | 0.63      | 4.07E-01 | no |
| Camp         | 1.17  | 2.41  | 1.04      | 4.08E-01 | no |
| Shc4         | 1.20  | 1.91  | 0.67      | 4.08E-01 | no |
| Abtb1        | 16.12 | 21.78 | 0.43      | 4.08E-01 | no |
| Hspa14       | 37.84 | 29.07 | -0.38     | 4.08E-01 | no |
| Ipo7         | 51.62 | 40.86 | -0.34     | 4.08E-01 | no |
| Cuta         | 37.90 | 51.66 | 0.45      | 4.08E-01 | no |
| LOC624853    | 0.44  | 0.00  | -1.79769e | 4.09E-01 | no |
| Slc27a2      | 0.24  | 0.55  | 1.20      | 4.09E-01 | no |
| Eif3l        | 65.23 | 51.49 | -0.34     | 4.09E-01 | no |
| Bcl2l13      | 15.59 | 12.22 | -0.35     | 4.09E-01 | no |
| Atp10d       | 5.88  | 4.31  | -0.45     | 4.09E-01 | no |
| Ccdc126      | 1.27  | 2.22  | 0.80      | 4.09E-01 | no |
| Elavl1       | 25.31 | 19.99 | -0.34     | 4.09E-01 | no |
| Eif3j        | 42.27 | 32.95 | -0.36     | 4.09E-01 | no |
| Slc2a3       | 7.83  | 5.58  | -0.49     | 4.09E-01 | no |

|               |        |        |       |          |    |
|---------------|--------|--------|-------|----------|----|
| Kif3c         | 3.75   | 5.13   | 0.45  | 4.10E-01 | no |
| Sord          | 20.80  | 27.24  | 0.39  | 4.10E-01 | no |
| Syne2         | 6.88   | 5.42   | -0.34 | 4.10E-01 | no |
| Dap           | 49.27  | 38.20  | -0.37 | 4.10E-01 | no |
| Adck1         | 5.89   | 8.60   | 0.55  | 4.11E-01 | no |
| Ccdc88b       | 3.13   | 4.42   | 0.50  | 4.11E-01 | no |
| Rbm15         | 22.68  | 17.58  | -0.37 | 4.11E-01 | no |
| Ctnn          | 0.10   | 0.29   | 1.49  | 4.12E-01 | no |
| Ptpmt1        | 7.19   | 10.86  | 0.60  | 4.12E-01 | no |
| Tra2b         | 152.19 | 121.14 | -0.33 | 4.12E-01 | no |
| Serpinf2      | 0.20   | 0.49   | 1.29  | 4.12E-01 | no |
| Erbp2ip       | 33.59  | 40.35  | 0.26  | 4.12E-01 | no |
| Dlst          | 44.06  | 34.75  | -0.34 | 4.12E-01 | no |
| 2310008H09Ri  | 19.26  | 15.47  | -0.32 | 4.13E-01 | no |
| Akap11        | 17.78  | 14.08  | -0.34 | 4.13E-01 | no |
| Ppp2r5d       | 32.28  | 25.32  | -0.35 | 4.13E-01 | no |
| Dmwd          | 0.76   | 0.39   | -0.98 | 4.13E-01 | no |
| Slc47a2       | 0.11   | 0.36   | 1.74  | 4.13E-01 | no |
| Nup88         | 36.93  | 29.55  | -0.32 | 4.13E-01 | no |
| Dot1l         | 30.46  | 24.21  | -0.33 | 4.13E-01 | no |
| Zfp382        | 13.07  | 9.33   | -0.49 | 4.13E-01 | no |
| Krt222        | 0.54   | 0.25   | -1.13 | 4.13E-01 | no |
| 6230427J02RiI | 13.69  | 19.66  | 0.52  | 4.13E-01 | no |
| Slco2b1       | 0.20   | 0.07   | -1.45 | 4.13E-01 | no |
| Ppp1r3d       | 0.07   | 0.23   | 1.72  | 4.14E-01 | no |
| Kcna5         | 0.36   | 0.15   | -1.27 | 4.14E-01 | no |
| Flad1         | 12.27  | 16.67  | 0.44  | 4.14E-01 | no |
| Zfp704        | 8.34   | 10.63  | 0.35  | 4.14E-01 | no |
| Cstf2         | 37.20  | 29.52  | -0.33 | 4.14E-01 | no |
| 2510009E07Ri  | 3.84   | 2.57   | -0.58 | 4.14E-01 | no |
| Rab44         | 2.89   | 1.89   | -0.62 | 4.14E-01 | no |
| Enpp1         | 1.92   | 1.15   | -0.74 | 4.14E-01 | no |
| Fuca1         | 10.65  | 14.52  | 0.45  | 4.14E-01 | no |
| Spon1         | 0.11   | 0.24   | 1.12  | 4.15E-01 | no |
| Tsen34        | 15.69  | 11.09  | -0.50 | 4.15E-01 | no |
| Slc26a11      | 1.07   | 1.86   | 0.80  | 4.15E-01 | no |
| Nutf2         | 12.24  | 8.49   | -0.53 | 4.15E-01 | no |
| Zfp287        | 1.33   | 2.11   | 0.67  | 4.15E-01 | no |
| Furin         | 9.42   | 12.25  | 0.38  | 4.15E-01 | no |
| Csl           | 13.67  | 9.66   | -0.50 | 4.15E-01 | no |
| Fastkd5       | 11.81  | 8.70   | -0.44 | 4.15E-01 | no |
| Galt          | 8.89   | 12.60  | 0.50  | 4.16E-01 | no |

|               |       |       |            |          |    |
|---------------|-------|-------|------------|----------|----|
| Parp2         | 27.75 | 20.88 | -0.41      | 4.17E-01 | no |
| Phex          | 0.11  | 0.02  | -2.52      | 4.17E-01 | no |
| Gm10394       | 0.00  | 0.07  | 1.79769e+  | 4.18E-01 | no |
| Theg          | 0.00  | 0.15  | 1.79769e+  | 4.18E-01 | no |
| 1700016K19Ri  | 0.16  | 0.00  | -1.79769e- | 4.18E-01 | no |
| 1700065117Rik | 0.28  | 0.00  | -1.79769e- | 4.18E-01 | no |
| 1700084C01Ri  | 0.12  | 0.00  | -1.79769e- | 4.18E-01 | no |
| Adamtsl3      | 0.02  | 0.00  | -1.79769e- | 4.18E-01 | no |
| Adra2c        | 0.05  | 0.00  | -1.79769e- | 4.18E-01 | no |
| Als2cr12      | 0.11  | 0.00  | -1.79769e- | 4.18E-01 | no |
| Atf7ip2       | 0.09  | 0.00  | -1.79769e- | 4.18E-01 | no |
| Bmp6          | 0.07  | 0.00  | -1.79769e- | 4.18E-01 | no |
| Car4          | 0.13  | 0.00  | -1.79769e- | 4.18E-01 | no |
| Ccdc48        | 0.05  | 0.00  | -1.79769e- | 4.18E-01 | no |
| Dbx2          | 0.08  | 0.00  | -1.79769e- | 4.18E-01 | no |
| Ephb3         | 0.04  | 0.00  | -1.79769e- | 4.18E-01 | no |
| Fam46d        | 0.09  | 0.00  | -1.79769e- | 4.18E-01 | no |
| Ffar3         | 0.11  | 0.00  | -1.79769e- | 4.18E-01 | no |
| Figf          | 0.10  | 0.00  | -1.79769e- | 4.18E-01 | no |
| Fras1         | 0.01  | 0.00  | -1.79769e- | 4.18E-01 | no |
| Galnt11       | 0.04  | 0.00  | -1.79769e- | 4.18E-01 | no |
| Gm11529       | 0.08  | 0.00  | -1.79769e- | 4.18E-01 | no |
| Gm4598        | 0.17  | 0.00  | -1.79769e- | 4.18E-01 | no |
| Gm7092        | 0.15  | 0.00  | -1.79769e- | 4.18E-01 | no |
| Lhx9          | 0.09  | 0.00  | -1.79769e- | 4.18E-01 | no |
| Lor           | 0.09  | 0.00  | -1.79769e- | 4.18E-01 | no |
| Lpo           | 0.06  | 0.00  | -1.79769e- | 4.18E-01 | no |
| Ncan          | 0.02  | 0.00  | -1.79769e- | 4.18E-01 | no |
| Npas2         | 0.04  | 0.00  | -1.79769e- | 4.18E-01 | no |
| Nxn12         | 0.14  | 0.00  | -1.79769e- | 4.18E-01 | no |
| Oas1h         | 0.14  | 0.00  | -1.79769e- | 4.18E-01 | no |
| Pdzrn3        | 0.04  | 0.00  | -1.79769e- | 4.18E-01 | no |
| Pkd2l1        | 0.05  | 0.00  | -1.79769e- | 4.18E-01 | no |
| Ptk6          | 0.07  | 0.00  | -1.79769e- | 4.18E-01 | no |
| Rdh8          | 0.11  | 0.00  | -1.79769e- | 4.18E-01 | no |
| Rnf32         | 0.17  | 0.00  | -1.79769e- | 4.18E-01 | no |
| Slc17a1       | 0.10  | 0.00  | -1.79769e- | 4.18E-01 | no |
| Slc27a5       | 0.07  | 0.00  | -1.79769e- | 4.18E-01 | no |
| Sycp2         | 0.04  | 0.00  | -1.79769e- | 4.18E-01 | no |
| Tigd4         | 0.07  | 0.00  | -1.79769e- | 4.18E-01 | no |
| Tmem45b       | 0.13  | 0.00  | -1.79769e- | 4.18E-01 | no |
| Tnn           | 0.03  | 0.00  | -1.79769e- | 4.18E-01 | no |

|               |        |        |           |          |    |
|---------------|--------|--------|-----------|----------|----|
| Tuba3a        | 0.11   | 0.00   | -1.79769e | 4.18E-01 | no |
| Wtip          | 0.08   | 0.00   | -1.79769e | 4.18E-01 | no |
| Xirp1         | 0.02   | 0.00   | -1.79769e | 4.18E-01 | no |
| Matn2         | 0.05   | 0.21   | 2.04      | 4.18E-01 | no |
| Gm13305,Il111 | 0.51   | 1.41   | 1.47      | 4.18E-01 | no |
| Pltp          | 0.20   | 0.52   | 1.39      | 4.18E-01 | no |
| Nhs           | 0.21   | 0.41   | 0.95      | 4.18E-01 | no |
| BC029214      | 10.17  | 15.20  | 0.58      | 4.18E-01 | no |
| Zfyve16       | 4.37   | 6.09   | 0.48      | 4.18E-01 | no |
| D6Wsu116e     | 16.43  | 21.00  | 0.35      | 4.18E-01 | no |
| Tap2          | 28.65  | 36.59  | 0.35      | 4.18E-01 | no |
| Fth1          | 193.48 | 242.70 | 0.33      | 4.18E-01 | no |
| Foxp4         | 30.68  | 25.59  | -0.26     | 4.18E-01 | no |
| Luc7l         | 38.32  | 31.23  | -0.30     | 4.18E-01 | no |
| Pold1         | 64.89  | 51.85  | -0.32     | 4.18E-01 | no |
| Papola        | 58.22  | 46.49  | -0.32     | 4.18E-01 | no |
| Pnn           | 56.51  | 45.03  | -0.33     | 4.18E-01 | no |
| Etf1          | 48.86  | 38.87  | -0.33     | 4.18E-01 | no |
| Cct3          | 68.74  | 54.53  | -0.33     | 4.18E-01 | no |
| Ssbp3         | 19.78  | 15.41  | -0.36     | 4.18E-01 | no |
| 2610318N02Ri  | 29.08  | 21.40  | -0.44     | 4.18E-01 | no |
| Yaf2          | 15.14  | 11.03  | -0.46     | 4.18E-01 | no |
| Exosc6        | 17.46  | 12.19  | -0.52     | 4.18E-01 | no |
| Lsm5          | 43.88  | 30.05  | -0.55     | 4.18E-01 | no |
| Tspan5        | 6.49   | 4.44   | -0.55     | 4.18E-01 | no |
| Lactb         | 9.29   | 6.35   | -0.55     | 4.18E-01 | no |
| Rinl          | 4.90   | 3.27   | -0.59     | 4.18E-01 | no |
| Cass4         | 2.83   | 1.80   | -0.65     | 4.18E-01 | no |
| Trappc2       | 10.93  | 6.73   | -0.70     | 4.18E-01 | no |
| Lrrn3         | 2.10   | 1.27   | -0.73     | 4.18E-01 | no |
| Gm15698       | 1.90   | 0.94   | -1.02     | 4.18E-01 | no |
| Lamb1         | 0.20   | 0.09   | -1.18     | 4.18E-01 | no |
| 4833418N02Ri  | 0.75   | 0.32   | -1.23     | 4.18E-01 | no |
| Astl          | 0.47   | 0.20   | -1.25     | 4.18E-01 | no |
| Vsig10        | 0.23   | 0.09   | -1.45     | 4.18E-01 | no |
| Spata9        | 0.60   | 0.11   | -2.48     | 4.18E-01 | no |
| Ppm1d         | 19.51  | 14.82  | -0.40     | 4.18E-01 | no |
| Zfp57         | 0.00   | 0.11   | 1.79769e+ | 4.18E-01 | no |
| Wdr89         | 83.64  | 66.80  | -0.32     | 4.18E-01 | no |
| Serpini1      | 1.29   | 0.72   | -0.84     | 4.18E-01 | no |
| Prpf18        | 24.12  | 18.74  | -0.36     | 4.19E-01 | no |
| Uckl1         | 13.51  | 18.52  | 0.46      | 4.19E-01 | no |

|              |        |        |            |          |    |
|--------------|--------|--------|------------|----------|----|
| Atp11c       | 22.43  | 18.27  | -0.30      | 4.19E-01 | no |
| Trim68       | 4.66   | 6.90   | 0.57       | 4.19E-01 | no |
| Plekhf1      | 1.50   | 2.60   | 0.79       | 4.19E-01 | no |
| Polr1c       | 23.60  | 17.06  | -0.47      | 4.19E-01 | no |
| 1700066M21R  | 10.07  | 7.13   | -0.50      | 4.19E-01 | no |
| Pgap3        | 5.64   | 8.18   | 0.54       | 4.20E-01 | no |
| Slc35c1      | 19.03  | 24.16  | 0.34       | 4.20E-01 | no |
| Habp4        | 1.93   | 1.16   | -0.74      | 4.20E-01 | no |
| Fzr1         | 38.87  | 30.57  | -0.35      | 4.20E-01 | no |
| Sp140        | 5.81   | 8.40   | 0.53       | 4.20E-01 | no |
| lsg20l2      | 32.53  | 25.54  | -0.35      | 4.20E-01 | no |
| Hmg1l1       | 2.45   | 1.36   | -0.85      | 4.21E-01 | no |
| Gm4841       | 0.08   | 0.30   | 1.97       | 4.21E-01 | no |
| D6Mm5e       | 0.96   | 1.68   | 0.82       | 4.21E-01 | no |
| Snx32        | 5.13   | 7.74   | 0.59       | 4.21E-01 | no |
| Fam189b      | 10.68  | 14.34  | 0.43       | 4.21E-01 | no |
| Snx33        | 7.08   | 9.47   | 0.42       | 4.21E-01 | no |
| Kif13a       | 4.65   | 6.20   | 0.42       | 4.21E-01 | no |
| Ifi203       | 71.51  | 85.50  | 0.26       | 4.21E-01 | no |
| D830031N03R  | 5.00   | 3.68   | -0.44      | 4.21E-01 | no |
| Cenpq        | 21.36  | 15.27  | -0.48      | 4.21E-01 | no |
| D630029K05Ri | 0.19   | 0.00   | -1.79769e- | 4.21E-01 | no |
| Gm14139      | 0.13   | 0.00   | -1.79769e- | 4.21E-01 | no |
| Ado          | 16.84  | 13.01  | -0.37      | 4.21E-01 | no |
| Trim15       | 0.15   | 0.00   | -1.79769e- | 4.22E-01 | no |
| Zfp839       | 4.57   | 6.38   | 0.48       | 4.22E-01 | no |
| Mbnl2        | 16.54  | 20.93  | 0.34       | 4.22E-01 | no |
| Ssr1         | 20.33  | 16.22  | -0.33      | 4.22E-01 | no |
| Eif2b1       | 18.82  | 13.84  | -0.44      | 4.22E-01 | no |
| Tsks         | 0.00   | 0.12   | 1.79769e+  | 4.22E-01 | no |
| Rps5         | 303.59 | 243.01 | -0.32      | 4.22E-01 | no |
| Ubap2        | 36.54  | 29.14  | -0.33      | 4.22E-01 | no |
| Tspan4       | 6.32   | 4.02   | -0.65      | 4.22E-01 | no |
| Akap9        | 11.41  | 14.34  | 0.33       | 4.22E-01 | no |
| 2700029M09R  | 40.26  | 30.16  | -0.42      | 4.22E-01 | no |
| Nop58        | 50.53  | 39.79  | -0.34      | 4.22E-01 | no |
| Cblb         | 16.42  | 12.90  | -0.35      | 4.22E-01 | no |
| BC051142     | 0.28   | 0.71   | 1.31       | 4.23E-01 | no |
| Gipc3        | 0.61   | 1.31   | 1.11       | 4.23E-01 | no |
| Adcy6        | 2.27   | 3.30   | 0.54       | 4.23E-01 | no |
| 2310008H04Ri | 9.93   | 7.19   | -0.46      | 4.23E-01 | no |
| Galm         | 0.61   | 1.14   | 0.89       | 4.23E-01 | no |

|              |        |        |           |          |    |
|--------------|--------|--------|-----------|----------|----|
| Emilin1      | 5.81   | 8.04   | 0.47      | 4.23E-01 | no |
| Casp12       | 0.03   | 0.21   | 3.00      | 4.23E-01 | no |
| Hus1         | 14.10  | 10.79  | -0.39     | 4.24E-01 | no |
| Best3        | 0.07   | 0.00   | -1.79769e | 4.25E-01 | no |
| Nut          | 0.05   | 0.00   | -1.79769e | 4.25E-01 | no |
| Cuedc1       | 1.50   | 0.85   | -0.82     | 4.25E-01 | no |
| Nudt5        | 33.10  | 25.13  | -0.40     | 4.26E-01 | no |
| Atg14        | 6.76   | 9.34   | 0.47      | 4.26E-01 | no |
| BC053749     | 12.52  | 9.14   | -0.45     | 4.26E-01 | no |
| Gan          | 4.04   | 5.97   | 0.56      | 4.27E-01 | no |
| Man1a        | 22.01  | 27.94  | 0.34      | 4.27E-01 | no |
| Ahsa2        | 8.65   | 6.21   | -0.48     | 4.27E-01 | no |
| Rexo2        | 23.67  | 16.81  | -0.49     | 4.27E-01 | no |
| Catsperg2    | 0.07   | 0.23   | 1.64      | 4.28E-01 | no |
| Epb4.2       | 0.04   | 0.00   | -1.79769e | 4.28E-01 | no |
| Ggt7         | 0.05   | 0.00   | -1.79769e | 4.28E-01 | no |
| Bcl6b        | 1.55   | 2.54   | 0.71      | 4.28E-01 | no |
| Zfr2         | 0.24   | 0.47   | 0.99      | 4.28E-01 | no |
| Syt13        | 0.12   | 0.02   | -2.65     | 4.28E-01 | no |
| Cxcr2        | 0.24   | 0.52   | 1.11      | 4.28E-01 | no |
| Ppt2         | 5.47   | 8.26   | 0.60      | 4.28E-01 | no |
| Pstpip2      | 1.04   | 0.55   | -0.92     | 4.28E-01 | no |
| Gramd4       | 37.21  | 29.71  | -0.32     | 4.29E-01 | no |
| 1700001J11Ri | 0.67   | 1.24   | 0.88      | 4.29E-01 | no |
| Cul3         | 48.55  | 38.56  | -0.33     | 4.30E-01 | no |
| Psm2         | 65.11  | 52.27  | -0.32     | 4.31E-01 | no |
| Arap2        | 8.20   | 6.27   | -0.39     | 4.31E-01 | no |
| Hist2h2bb    | 4.06   | 2.14   | -0.92     | 4.31E-01 | no |
| Prps1l3      | 38.63  | 30.73  | -0.33     | 4.31E-01 | no |
| Fam54b       | 16.91  | 22.65  | 0.42      | 4.32E-01 | no |
| Plin2        | 18.48  | 24.44  | 0.40      | 4.33E-01 | no |
| Nsmaf        | 19.58  | 24.97  | 0.35      | 4.33E-01 | no |
| Ppp2r2d      | 23.96  | 18.12  | -0.40     | 4.33E-01 | no |
| Cdk2ap2      | 42.35  | 31.55  | -0.42     | 4.33E-01 | no |
| Hcn2         | 0.29   | 0.11   | -1.38     | 4.33E-01 | no |
| Nme2         | 167.46 | 136.09 | -0.30     | 4.33E-01 | no |
| C030019I05Ri | 31.28  | 24.26  | -0.37     | 4.33E-01 | no |
| Atp6ap1      | 44.79  | 35.32  | -0.34     | 4.33E-01 | no |
| Gpx2-ps1     | 1.12   | 0.50   | -1.18     | 4.33E-01 | no |
| Sac3d1       | 17.91  | 12.74  | -0.49     | 4.33E-01 | no |
| Gapt         | 1.72   | 0.96   | -0.83     | 4.33E-01 | no |
| Ndufab1      | 35.41  | 25.34  | -0.48     | 4.33E-01 | no |

|              |        |        |            |          |    |
|--------------|--------|--------|------------|----------|----|
| Cdr2         | 1.90   | 1.15   | -0.73      | 4.33E-01 | no |
| Gas2         | 3.09   | 1.90   | -0.70      | 4.33E-01 | no |
| Prkcd        | 43.14  | 54.33  | 0.33       | 4.34E-01 | no |
| Polr3h       | 11.77  | 8.53   | -0.47      | 4.34E-01 | no |
| Gm5483       | 0.00   | 0.44   | 1.79769e+  | 4.34E-01 | no |
| Pcyt1b       | 1.48   | 0.90   | -0.71      | 4.34E-01 | no |
| Tln2         | 0.14   | 0.07   | -0.97      | 4.34E-01 | no |
| Fetub        | 0.19   | 0.00   | -1.79769e- | 4.35E-01 | no |
| Cbl          | 25.09  | 19.92  | -0.33      | 4.35E-01 | no |
| Nhp2         | 35.83  | 26.50  | -0.43      | 4.35E-01 | no |
| Rabl5        | 33.06  | 24.00  | -0.46      | 4.35E-01 | no |
| Zdhhc2       | 0.65   | 0.31   | -1.08      | 4.35E-01 | no |
| Arhgap18     | 13.09  | 17.08  | 0.38       | 4.35E-01 | no |
| Tbp          | 27.04  | 20.41  | -0.41      | 4.35E-01 | no |
| BC013712     | 24.81  | 19.23  | -0.37      | 4.36E-01 | no |
| Zfp114       | 0.75   | 1.34   | 0.84       | 4.37E-01 | no |
| Ndel1        | 15.65  | 20.59  | 0.40       | 4.37E-01 | no |
| Stk35        | 14.94  | 11.98  | -0.32      | 4.37E-01 | no |
| Sf3a3        | 36.12  | 28.00  | -0.37      | 4.37E-01 | no |
| Agrn         | 1.09   | 0.68   | -0.67      | 4.37E-01 | no |
| Ywhae        | 126.58 | 101.63 | -0.32      | 4.37E-01 | no |
| Rhoc         | 0.11   | 0.55   | 2.30       | 4.37E-01 | no |
| Gpr150       | 0.24   | 0.55   | 1.22       | 4.37E-01 | no |
| Fam53b       | 107.21 | 128.25 | 0.26       | 4.37E-01 | no |
| Usp6nl       | 16.39  | 13.01  | -0.33      | 4.37E-01 | no |
| Zmpste24     | 28.46  | 22.36  | -0.35      | 4.37E-01 | no |
| 2610039C10Ri | 31.32  | 23.08  | -0.44      | 4.37E-01 | no |
| Svip         | 1.28   | 2.18   | 0.78       | 4.38E-01 | no |
| Ywhaq        | 65.53  | 52.22  | -0.33      | 4.38E-01 | no |
| Piga         | 9.98   | 7.25   | -0.46      | 4.38E-01 | no |
| 2010109K11Ri | 10.51  | 7.79   | -0.43      | 4.38E-01 | no |
| Naaladl1     | 1.74   | 1.02   | -0.77      | 4.38E-01 | no |
| Gng2         | 13.32  | 17.43  | 0.39       | 4.38E-01 | no |
| Wdr19        | 1.33   | 2.09   | 0.65       | 4.38E-01 | no |
| Sfxn4        | 1.48   | 2.45   | 0.72       | 4.39E-01 | no |
| Rimbp3       | 0.17   | 0.32   | 0.95       | 4.40E-01 | no |
| Scn3a        | 0.01   | 0.10   | 3.42       | 4.40E-01 | no |
| Rrad         | 0.84   | 1.53   | 0.87       | 4.40E-01 | no |
| Cabp1        | 0.33   | 0.78   | 1.25       | 4.40E-01 | no |
| Tnrc6b       | 15.32  | 18.11  | 0.24       | 4.40E-01 | no |
| Krt18        | 0.12   | 0.41   | 1.80       | 4.40E-01 | no |
| 1810063B07Ri | 2.24   | 3.57   | 0.67       | 4.40E-01 | no |

|               |        |        |       |          |    |
|---------------|--------|--------|-------|----------|----|
| Lef1          | 59.65  | 74.68  | 0.32  | 4.40E-01 | no |
| Ept1          | 7.67   | 5.76   | -0.41 | 4.41E-01 | no |
| Rps6ka5       | 11.19  | 8.43   | -0.41 | 4.41E-01 | no |
| Zfp429        | 5.42   | 8.10   | 0.58  | 4.41E-01 | no |
| Asnsd1        | 34.92  | 27.31  | -0.35 | 4.42E-01 | no |
| Ccdc61        | 14.12  | 10.27  | -0.46 | 4.42E-01 | no |
| Gprasp1       | 11.52  | 14.24  | 0.31  | 4.42E-01 | no |
| Tkt           | 59.53  | 47.85  | -0.32 | 4.42E-01 | no |
| Slc3a2        | 27.95  | 21.98  | -0.35 | 4.42E-01 | no |
| Psma6         | 70.61  | 54.95  | -0.36 | 4.42E-01 | no |
| Mett10d       | 17.91  | 13.56  | -0.40 | 4.42E-01 | no |
| Pla2g15       | 10.21  | 7.35   | -0.47 | 4.42E-01 | no |
| Mcp1          | 7.38   | 5.41   | -0.45 | 4.42E-01 | no |
| Cchcr1        | 17.48  | 13.40  | -0.38 | 4.43E-01 | no |
| Usp54         | 4.25   | 5.71   | 0.43  | 4.43E-01 | no |
| Timm50        | 36.24  | 27.32  | -0.41 | 4.44E-01 | no |
| Bmi1          | 24.76  | 19.37  | -0.35 | 4.44E-01 | no |
| Cep110        | 35.17  | 28.26  | -0.32 | 4.44E-01 | no |
| Rassf5        | 30.48  | 38.31  | 0.33  | 4.44E-01 | no |
| Tmem121       | 5.79   | 3.71   | -0.64 | 4.44E-01 | no |
| Prkra         | 7.49   | 11.05  | 0.56  | 4.45E-01 | no |
| Trp53i13      | 7.67   | 11.24  | 0.55  | 4.45E-01 | no |
| Bloc1s2       | 22.06  | 15.44  | -0.52 | 4.45E-01 | no |
| Tada2b        | 14.50  | 11.10  | -0.38 | 4.45E-01 | no |
| Htt           | 15.02  | 12.06  | -0.32 | 4.45E-01 | no |
| D4Ert22e      | 43.70  | 36.15  | -0.27 | 4.45E-01 | no |
| Cst3          | 54.27  | 40.71  | -0.41 | 4.45E-01 | no |
| Prdm5         | 0.73   | 1.31   | 0.85  | 4.46E-01 | no |
| Prpf19        | 58.25  | 46.51  | -0.32 | 4.46E-01 | no |
| Rplp0         | 513.28 | 406.11 | -0.34 | 4.46E-01 | no |
| 4930503L19Ril | 16.36  | 12.05  | -0.44 | 4.46E-01 | no |
| Tmsb15b1      | 5.28   | 9.15   | 0.79  | 4.46E-01 | no |
| Accs          | 3.82   | 5.84   | 0.61  | 4.46E-01 | no |
| Cap1          | 88.99  | 110.73 | 0.32  | 4.46E-01 | no |
| Agap2         | 8.34   | 10.74  | 0.36  | 4.46E-01 | no |
| Sorcs2        | 7.67   | 5.80   | -0.40 | 4.46E-01 | no |
| Ostf1         | 27.47  | 35.65  | 0.38  | 4.46E-01 | no |
| Hcfc1         | 65.68  | 52.38  | -0.33 | 4.47E-01 | no |
| Cyba          | 33.33  | 44.80  | 0.43  | 4.48E-01 | no |
| D10Wsu52e     | 49.68  | 39.42  | -0.33 | 4.48E-01 | no |
| Nod2          | 0.56   | 0.95   | 0.75  | 4.49E-01 | no |
| Zfp39         | 5.81   | 4.09   | -0.51 | 4.49E-01 | no |



|              |        |        |            |          |    |
|--------------|--------|--------|------------|----------|----|
| Ddx19a       | 32.27  | 25.46  | -0.34      | 4.49E-01 | no |
| Pitpnb       | 29.26  | 22.95  | -0.35      | 4.49E-01 | no |
| Ppp1r7       | 21.03  | 16.47  | -0.35      | 4.49E-01 | no |
| Ranbp1       | 74.38  | 58.08  | -0.36      | 4.49E-01 | no |
| Ncbp2        | 29.96  | 23.11  | -0.37      | 4.49E-01 | no |
| Phf5a        | 33.42  | 25.49  | -0.39      | 4.49E-01 | no |
| B4galnt2     | 1.32   | 0.81   | -0.72      | 4.49E-01 | no |
| 5730408K05Ri | 10.91  | 6.41   | -0.77      | 4.49E-01 | no |
| Decr2        | 4.14   | 6.31   | 0.61       | 4.49E-01 | no |
| Cul1         | 35.54  | 28.30  | -0.33      | 4.49E-01 | no |
| Cpne1        | 36.30  | 29.41  | -0.30      | 4.50E-01 | no |
| H2-DMb2      | 4.18   | 2.37   | -0.82      | 4.50E-01 | no |
| Col20a1      | 0.24   | 0.45   | 0.90       | 4.50E-01 | no |
| Tmem51       | 0.11   | 0.32   | 1.54       | 4.51E-01 | no |
| 3110048L19Ri | 1.73   | 2.23   | 0.37       | 4.51E-01 | no |
| Rbbp8        | 19.51  | 15.14  | -0.37      | 4.51E-01 | no |
| Nespas       | 1.00   | 0.53   | -0.91      | 4.51E-01 | no |
| 1110008F13Ri | 56.64  | 43.67  | -0.38      | 4.51E-01 | no |
| Pcyox1l      | 8.53   | 5.88   | -0.54      | 4.52E-01 | no |
| Plxnb1       | 0.30   | 0.17   | -0.86      | 4.52E-01 | no |
| Srsf2ip      | 40.30  | 32.45  | -0.31      | 4.52E-01 | no |
| 4933434E20Ri | 20.51  | 26.95  | 0.39       | 4.52E-01 | no |
| Hibadh       | 48.19  | 37.91  | -0.35      | 4.52E-01 | no |
| Ank          | 0.73   | 1.23   | 0.75       | 4.53E-01 | no |
| Mrfap1       | 134.73 | 108.48 | -0.31      | 4.53E-01 | no |
| Thoc6        | 25.46  | 18.93  | -0.43      | 4.53E-01 | no |
| Cd34         | 0.11   | 0.00   | -1.79769e- | 4.53E-01 | no |
| Ttyh2        | 0.26   | 0.51   | 0.99       | 4.53E-01 | no |
| Ticam1       | 3.92   | 5.70   | 0.54       | 4.53E-01 | no |
| Fam171b      | 0.03   | 0.19   | 2.45       | 4.53E-01 | no |
| Glt8d2       | 0.17   | 0.44   | 1.32       | 4.53E-01 | no |
| Il21r        | 8.08   | 11.07  | 0.45       | 4.53E-01 | no |
| Smurf2       | 12.46  | 9.66   | -0.37      | 4.53E-01 | no |
| LOC100042049 | 69.82  | 53.33  | -0.39      | 4.53E-01 | no |
| Ccdc25       | 19.82  | 14.95  | -0.41      | 4.53E-01 | no |
| Siglec1      | 0.23   | 0.12   | -0.99      | 4.54E-01 | no |
| G3bp1        | 97.33  | 78.50  | -0.31      | 4.54E-01 | no |
| Exosc9       | 27.09  | 20.43  | -0.41      | 4.54E-01 | no |
| Setd6        | 7.91   | 5.32   | -0.57      | 4.54E-01 | no |
| Gas8         | 3.99   | 5.99   | 0.59       | 4.54E-01 | no |
| Zfp111       | 0.84   | 1.33   | 0.67       | 4.54E-01 | no |
| Las1l        | 24.00  | 18.70  | -0.36      | 4.54E-01 | no |

|              |        |        |           |          |    |
|--------------|--------|--------|-----------|----------|----|
| Rhbdl3       | 0.18   | 0.36   | 1.03      | 4.55E-01 | no |
| Hnrnpk       | 308.84 | 246.03 | -0.33     | 4.55E-01 | no |
| Aarsd1       | 24.92  | 18.49  | -0.43     | 4.55E-01 | no |
| Bivm         | 3.50   | 5.13   | 0.55      | 4.55E-01 | no |
| Eif5a2       | 3.13   | 4.52   | 0.53      | 4.55E-01 | no |
| Cpsf2        | 42.19  | 34.02  | -0.31     | 4.55E-01 | no |
| Gzmm         | 0.74   | 0.32   | -1.20     | 4.55E-01 | no |
| 1700026D11Ri | 0.21   | 0.00   | -1.79769e | 4.56E-01 | no |
| Dcst1        | 0.07   | 0.00   | -1.79769e | 4.56E-01 | no |
| Lin28b       | 0.04   | 0.00   | -1.79769e | 4.56E-01 | no |
| Tacstd2      | 0.09   | 0.00   | -1.79769e | 4.56E-01 | no |
| Dok2         | 1.60   | 2.71   | 0.76      | 4.56E-01 | no |
| Sbf2         | 1.17   | 1.77   | 0.60      | 4.56E-01 | no |
| Clybl        | 5.03   | 7.72   | 0.62      | 4.56E-01 | no |
| Dhrs9        | 0.04   | 0.28   | 2.94      | 4.57E-01 | no |
| Rhobtb3      | 0.04   | 0.17   | 2.02      | 4.57E-01 | no |
| Eef1b2       | 79.66  | 63.99  | -0.32     | 4.57E-01 | no |
| Hsd3b7       | 3.97   | 2.49   | -0.67     | 4.57E-01 | no |
| Gem          | 4.64   | 6.87   | 0.56      | 4.57E-01 | no |
| Dis3         | 19.40  | 15.17  | -0.36     | 4.58E-01 | no |
| Uvrag        | 20.35  | 25.68  | 0.34      | 4.58E-01 | no |
| Sp2          | 23.56  | 18.79  | -0.33     | 4.58E-01 | no |
| Ranbp3l      | 0.24   | 0.49   | 1.04      | 4.58E-01 | no |
| Mfsd11       | 6.41   | 8.93   | 0.48      | 4.58E-01 | no |
| Eno1,Gm5506  | 65.45  | 52.37  | -0.32     | 4.58E-01 | no |
| Uchl5        | 31.49  | 24.55  | -0.36     | 4.58E-01 | no |
| Nxf1         | 49.68  | 39.67  | -0.32     | 4.59E-01 | no |
| Cdan1        | 15.51  | 12.33  | -0.33     | 4.59E-01 | no |
| Polr1b       | 17.08  | 13.34  | -0.36     | 4.59E-01 | no |
| Mdh1         | 56.74  | 45.21  | -0.33     | 4.59E-01 | no |
| Zcwpw1       | 7.49   | 5.21   | -0.52     | 4.59E-01 | no |
| Mei1         | 0.02   | 0.20   | 3.35      | 4.59E-01 | no |
| Leng9        | 2.18   | 3.48   | 0.68      | 4.59E-01 | no |
| Xpa          | 5.59   | 8.64   | 0.63      | 4.59E-01 | no |
| Adcy3        | 3.24   | 4.92   | 0.60      | 4.59E-01 | no |
| Hectd3       | 11.37  | 14.53  | 0.35      | 4.59E-01 | no |
| Dnajc21      | 28.60  | 36.30  | 0.34      | 4.59E-01 | no |
| Smc1a        | 58.39  | 47.18  | -0.31     | 4.59E-01 | no |
| Utp20        | 14.32  | 11.48  | -0.32     | 4.59E-01 | no |
| Tsn          | 45.64  | 36.51  | -0.32     | 4.59E-01 | no |
| Kdelr2       | 25.22  | 19.02  | -0.41     | 4.59E-01 | no |
| Lrrc8b       | 13.25  | 9.91   | -0.42     | 4.59E-01 | no |

|               |        |        |            |          |    |
|---------------|--------|--------|------------|----------|----|
| Poc5          | 13.11  | 9.80   | -0.42      | 4.59E-01 | no |
| Terf1         | 23.08  | 17.24  | -0.42      | 4.59E-01 | no |
| Saal1         | 7.39   | 5.46   | -0.44      | 4.59E-01 | no |
| Tiparp        | 8.30   | 6.05   | -0.45      | 4.59E-01 | no |
| Klhl10        | 0.14   | 0.40   | 1.48       | 4.60E-01 | no |
| Isyna1        | 29.41  | 22.72  | -0.37      | 4.60E-01 | no |
| 2010005H15Ri  | 0.00   | 0.25   | 1.79769e+  | 4.60E-01 | no |
| Slc38a1       | 54.73  | 63.83  | 0.22       | 4.60E-01 | no |
| Aire          | 0.07   | 0.28   | 1.93       | 4.60E-01 | no |
| Anapc1        | 32.57  | 26.32  | -0.31      | 4.60E-01 | no |
| Prdx1         | 112.99 | 90.69  | -0.32      | 4.60E-01 | no |
| Gm5595        | 1.41   | 2.26   | 0.68       | 4.60E-01 | no |
| Bcl9          | 11.63  | 14.82  | 0.35       | 4.60E-01 | no |
| Smarcb1       | 53.19  | 43.39  | -0.29      | 4.61E-01 | no |
| Gm8994        | 32.91  | 25.40  | -0.37      | 4.61E-01 | no |
| Cox8a         | 121.48 | 95.16  | -0.35      | 4.61E-01 | no |
| Palm          | 16.08  | 12.46  | -0.37      | 4.62E-01 | no |
| Ppp1r14c      | 0.00   | 0.06   | 1.79769e+  | 4.62E-01 | no |
| Rapgef6       | 20.24  | 25.13  | 0.31       | 4.62E-01 | no |
| Rps6ka3       | 23.80  | 18.15  | -0.39      | 4.62E-01 | no |
| 2210409E12Ri  | 1.45   | 0.28   | -2.36      | 4.62E-01 | no |
| 4930583H14Ri  | 0.00   | 0.14   | 1.79769e+  | 4.62E-01 | no |
| Gm6377        | 0.39   | 0.82   | 1.06       | 4.62E-01 | no |
| F11r          | 0.54   | 1.02   | 0.91       | 4.62E-01 | no |
| Memo1         | 37.97  | 29.16  | -0.38      | 4.62E-01 | no |
| Ubtd2         | 5.32   | 3.62   | -0.56      | 4.63E-01 | no |
| Ccdc63        | 0.46   | 0.21   | -1.11      | 4.63E-01 | no |
| Scn2a1        | 0.00   | 0.02   | 1.79769e+  | 4.63E-01 | no |
| Mcm3          | 76.45  | 61.86  | -0.31      | 4.63E-01 | no |
| Zfp101        | 13.62  | 10.04  | -0.44      | 4.63E-01 | no |
| Tslp          | 0.00   | 0.23   | 1.79769e+  | 4.63E-01 | no |
| Pabpc2        | 0.07   | 0.00   | -1.79769e- | 4.63E-01 | no |
| 4930592I03Rik | 0.14   | 0.00   | -1.79769e- | 4.63E-01 | no |
| Gm4832        | 0.28   | 0.00   | -1.79769e- | 4.63E-01 | no |
| Nono          | 186.87 | 150.16 | -0.32      | 4.63E-01 | no |
| Mettl14       | 14.21  | 10.63  | -0.42      | 4.63E-01 | no |
| Zfp395        | 16.79  | 21.23  | 0.34       | 4.63E-01 | no |
| Zfp709        | 5.25   | 7.33   | 0.48       | 4.63E-01 | no |
| Pcmt2         | 17.45  | 22.34  | 0.36       | 4.63E-01 | no |
| Lsm10         | 11.88  | 17.14  | 0.53       | 4.64E-01 | no |
| Gm7120        | 1.54   | 2.84   | 0.88       | 4.64E-01 | no |
| Usp3          | 24.52  | 31.42  | 0.36       | 4.64E-01 | no |

|              |        |        |           |          |    |
|--------------|--------|--------|-----------|----------|----|
| Bhlhe41      | 2.24   | 1.26   | -0.83     | 4.65E-01 | no |
| Mgat5        | 15.12  | 19.41  | 0.36      | 4.65E-01 | no |
| Ppp6r3       | 53.62  | 45.29  | -0.24     | 4.66E-01 | no |
| Lrrc8d       | 9.60   | 12.36  | 0.36      | 4.66E-01 | no |
| Depdc5       | 13.14  | 10.73  | -0.29     | 4.66E-01 | no |
| Herpud1      | 79.03  | 63.64  | -0.31     | 4.66E-01 | no |
| Thap2        | 12.87  | 9.61   | -0.42     | 4.66E-01 | no |
| L2hgdh       | 8.60   | 6.21   | -0.47     | 4.66E-01 | no |
| Ywhag        | 46.31  | 37.36  | -0.31     | 4.66E-01 | no |
| Nostrin      | 0.57   | 0.25   | -1.17     | 4.66E-01 | no |
| Tcf12        | 41.43  | 33.45  | -0.31     | 4.66E-01 | no |
| Ppwd1        | 17.77  | 13.36  | -0.41     | 4.66E-01 | no |
| Wdr34        | 10.02  | 7.02   | -0.51     | 4.66E-01 | no |
| Gm3086       | 0.40   | 1.10   | 1.45      | 4.66E-01 | no |
| Gm14085      | 3.45   | 5.01   | 0.54      | 4.66E-01 | no |
| Lrg1         | 0.05   | 0.37   | 2.85      | 4.67E-01 | no |
| Arhgef9      | 1.14   | 1.79   | 0.65      | 4.67E-01 | no |
| Rps6kc1      | 2.02   | 3.01   | 0.57      | 4.67E-01 | no |
| Fut10        | 2.25   | 3.34   | 0.57      | 4.67E-01 | no |
| Gfm1         | 19.73  | 15.16  | -0.38     | 4.67E-01 | no |
| Rufy1        | 13.23  | 9.94   | -0.41     | 4.67E-01 | no |
| Spire1       | 0.50   | 0.24   | -1.04     | 4.67E-01 | no |
| Tnpo1        | 40.37  | 33.81  | -0.26     | 4.67E-01 | no |
| Pde11a       | 0.07   | 0.24   | 1.76      | 4.68E-01 | no |
| A430107O13R  | 0.07   | 0.19   | 1.35      | 4.68E-01 | no |
| Zfp677       | 4.50   | 6.53   | 0.54      | 4.68E-01 | no |
| Ssb          | 66.92  | 54.35  | -0.30     | 4.68E-01 | no |
| Blmh         | 39.95  | 31.79  | -0.33     | 4.68E-01 | no |
| Polr2d       | 38.33  | 29.02  | -0.40     | 4.68E-01 | no |
| Gm14057      | 0.46   | 0.18   | -1.32     | 4.68E-01 | no |
| Mapk1ip1l    | 44.93  | 36.27  | -0.31     | 4.69E-01 | no |
| Tyrobp       | 5.91   | 9.57   | 0.70      | 4.69E-01 | no |
| Msl3         | 35.15  | 27.73  | -0.34     | 4.69E-01 | no |
| Thoc4        | 51.15  | 39.98  | -0.36     | 4.69E-01 | no |
| Neto2        | 3.96   | 2.75   | -0.53     | 4.69E-01 | no |
| Sash1        | 4.98   | 6.54   | 0.39      | 4.69E-01 | no |
| Atp5a1       | 144.93 | 117.35 | -0.30     | 4.70E-01 | no |
| Cpsf4        | 26.56  | 20.22  | -0.39     | 4.71E-01 | no |
| 1700019O17Ri | 0.08   | 0.00   | -1.79769e | 4.71E-01 | no |
| Aldob        | 0.07   | 0.00   | -1.79769e | 4.71E-01 | no |
| Amotl2       | 0.03   | 0.00   | -1.79769e | 4.71E-01 | no |
| Ano7         | 0.04   | 0.00   | -1.79769e | 4.71E-01 | no |

|              |       |       |           |          |    |
|--------------|-------|-------|-----------|----------|----|
| Bmp2         | 0.05  | 0.00  | -1.79769e | 4.71E-01 | no |
| Bnipl        | 0.08  | 0.00  | -1.79769e | 4.71E-01 | no |
| Chgb         | 0.05  | 0.00  | -1.79769e | 4.71E-01 | no |
| Cnksr1       | 0.06  | 0.00  | -1.79769e | 4.71E-01 | no |
| Colec12      | 0.04  | 0.00  | -1.79769e | 4.71E-01 | no |
| Ctf2         | 0.16  | 0.00  | -1.79769e | 4.71E-01 | no |
| Dchs1        | 0.01  | 0.00  | -1.79769e | 4.71E-01 | no |
| Dusp14       | 0.10  | 0.00  | -1.79769e | 4.71E-01 | no |
| Eml1         | 0.03  | 0.00  | -1.79769e | 4.71E-01 | no |
| Gpr3         | 0.06  | 0.00  | -1.79769e | 4.71E-01 | no |
| Marco        | 0.07  | 0.00  | -1.79769e | 4.71E-01 | no |
| Pla1a        | 0.07  | 0.00  | -1.79769e | 4.71E-01 | no |
| Spinkl       | 0.24  | 0.00  | -1.79769e | 4.71E-01 | no |
| Tmem145      | 0.06  | 0.00  | -1.79769e | 4.71E-01 | no |
| Pm20d2       | 0.13  | 0.27  | 1.04      | 4.71E-01 | no |
| Catsper2     | 1.02  | 1.74  | 0.77      | 4.71E-01 | no |
| Hemgn        | 1.17  | 1.95  | 0.74      | 4.71E-01 | no |
| Shb          | 1.88  | 2.92  | 0.64      | 4.71E-01 | no |
| Galk2        | 11.28 | 15.07 | 0.42      | 4.71E-01 | no |
| Snapin       | 18.04 | 23.80 | 0.40      | 4.71E-01 | no |
| Rps6ka1      | 11.97 | 15.51 | 0.37      | 4.71E-01 | no |
| Nsun2        | 30.83 | 24.84 | -0.31     | 4.71E-01 | no |
| Tbc1d10b     | 29.49 | 23.66 | -0.32     | 4.71E-01 | no |
| Ppil1        | 58.32 | 46.03 | -0.34     | 4.71E-01 | no |
| Ccdc88a      | 6.58  | 5.09  | -0.37     | 4.71E-01 | no |
| Bysl         | 13.88 | 10.72 | -0.37     | 4.71E-01 | no |
| Golt1b       | 18.81 | 14.33 | -0.39     | 4.71E-01 | no |
| Hspa4l       | 11.37 | 8.57  | -0.41     | 4.71E-01 | no |
| Nfs1         | 17.50 | 13.11 | -0.42     | 4.71E-01 | no |
| Lsm11        | 5.31  | 3.93  | -0.43     | 4.71E-01 | no |
| E130201H02Ri | 37.99 | 28.17 | -0.43     | 4.71E-01 | no |
| Tmem39b      | 16.42 | 12.05 | -0.45     | 4.71E-01 | no |
| Usp53        | 1.90  | 1.21  | -0.65     | 4.71E-01 | no |
| Ephb2        | 1.14  | 0.67  | -0.76     | 4.71E-01 | no |
| Galnt14      | 1.57  | 2.48  | 0.66      | 4.71E-01 | no |
| Msl1         | 42.69 | 34.55 | -0.31     | 4.71E-01 | no |
| Eya1         | 5.19  | 7.06  | 0.45      | 4.72E-01 | no |
| Dpy19l3      | 5.95  | 7.69  | 0.37      | 4.72E-01 | no |
| 4930529C04Ri | 1.64  | 1.03  | -0.67     | 4.72E-01 | no |
| Hbp1         | 25.99 | 32.26 | 0.31      | 4.73E-01 | no |
| AA474331     | 2.21  | 3.84  | 0.79      | 4.73E-01 | no |
| Nfkbiz       | 6.08  | 8.20  | 0.43      | 4.73E-01 | no |

|               |        |        |            |          |    |
|---------------|--------|--------|------------|----------|----|
| Hsd1l1        | 25.82  | 32.30  | 0.32       | 4.73E-01 | no |
| Mina          | 17.20  | 12.94  | -0.41      | 4.74E-01 | no |
| 1110002L01Ril | 7.61   | 5.48   | -0.47      | 4.74E-01 | no |
| Ebi3          | 1.15   | 2.13   | 0.89       | 4.75E-01 | no |
| Cln6          | 14.10  | 18.69  | 0.41       | 4.75E-01 | no |
| Gramd1a       | 27.99  | 35.03  | 0.32       | 4.75E-01 | no |
| Srsf6         | 77.62  | 63.02  | -0.30      | 4.75E-01 | no |
| Arfp1         | 14.84  | 11.20  | -0.41      | 4.75E-01 | no |
| Cbx1          | 49.34  | 38.65  | -0.35      | 4.75E-01 | no |
| Nkap          | 15.44  | 12.02  | -0.36      | 4.76E-01 | no |
| Prps1l1       | 0.08   | 0.36   | 2.19       | 4.76E-01 | no |
| Cct7          | 56.92  | 45.98  | -0.31      | 4.76E-01 | no |
| Parp14        | 18.31  | 22.73  | 0.31       | 4.77E-01 | no |
| Ubr7          | 36.29  | 29.16  | -0.32      | 4.77E-01 | no |
| Atp6v0a4      | 0.29   | 0.13   | -1.23      | 4.77E-01 | no |
| Aim2          | 10.75  | 14.40  | 0.42       | 4.77E-01 | no |
| Baiap2l1      | 0.38   | 0.69   | 0.87       | 4.78E-01 | no |
| Parp1         | 69.47  | 56.34  | -0.30      | 4.78E-01 | no |
| Rnf185        | 9.72   | 12.94  | 0.41       | 4.78E-01 | no |
| Cherp         | 45.59  | 36.97  | -0.30      | 4.78E-01 | no |
| Rpl4          | 513.43 | 409.72 | -0.33      | 4.78E-01 | no |
| C630043F03Ri  | 0.51   | 0.25   | -1.04      | 4.78E-01 | no |
| Esyt1         | 59.86  | 48.63  | -0.30      | 4.78E-01 | no |
| Srpk1         | 34.74  | 27.67  | -0.33      | 4.78E-01 | no |
| B4galt1       | 33.90  | 41.99  | 0.31       | 4.78E-01 | no |
| Phkb          | 8.58   | 11.19  | 0.38       | 4.79E-01 | no |
| Nr1i3         | 0.09   | 0.00   | -1.79769e- | 4.79E-01 | no |
| Unc119b       | 25.34  | 20.24  | -0.32      | 4.79E-01 | no |
| Whamm         | 8.15   | 10.87  | 0.42       | 4.79E-01 | no |
| Bnip3l        | 29.11  | 36.44  | 0.32       | 4.79E-01 | no |
| Ift80         | 19.03  | 15.01  | -0.34      | 4.79E-01 | no |
| Mfsd7a        | 0.05   | 0.24   | 2.18       | 4.79E-01 | no |
| Fbxo39        | 0.34   | 0.10   | -1.78      | 4.80E-01 | no |
| Mppe1         | 9.51   | 13.04  | 0.46       | 4.80E-01 | no |
| Elmo2         | 15.62  | 12.47  | -0.33      | 4.80E-01 | no |
| Psmc6         | 40.35  | 31.44  | -0.36      | 4.80E-01 | no |
| Tyk2          | 13.02  | 16.38  | 0.33       | 4.80E-01 | no |
| Gemin4        | 14.43  | 11.14  | -0.37      | 4.80E-01 | no |
| Atp5g3        | 111.67 | 88.56  | -0.33      | 4.80E-01 | no |
| Pttg1ip       | 17.00  | 22.13  | 0.38       | 4.81E-01 | no |
| Pias4         | 16.22  | 21.39  | 0.40       | 4.81E-01 | no |
| Slit1         | 4.09   | 2.94   | -0.48      | 4.81E-01 | no |

|               |       |       |           |          |    |
|---------------|-------|-------|-----------|----------|----|
| Glis3         | 0.13  | 0.03  | -2.29     | 4.82E-01 | no |
| Atp6v1f       | 56.04 | 72.61 | 0.37      | 4.82E-01 | no |
| Eif2c2        | 26.31 | 21.37 | -0.30     | 4.82E-01 | no |
| Ier3          | 0.59  | 0.17  | -1.77     | 4.82E-01 | no |
| Tulp3         | 6.51  | 8.80  | 0.43      | 4.82E-01 | no |
| Phlpp1        | 11.07 | 8.71  | -0.35     | 4.82E-01 | no |
| Impdh1        | 62.14 | 77.07 | 0.31      | 4.83E-01 | no |
| Chd1          | 26.90 | 21.84 | -0.30     | 4.83E-01 | no |
| Gm7367        | 97.25 | 78.41 | -0.31     | 4.83E-01 | no |
| Zfp473        | 2.39  | 1.58  | -0.60     | 4.84E-01 | no |
| 2200002K05Ri  | 0.00  | 0.07  | 1.79769e+ | 4.84E-01 | no |
| 4930519G04Ri  | 0.00  | 0.07  | 1.79769e+ | 4.84E-01 | no |
| A1bg          | 0.00  | 0.08  | 1.79769e+ | 4.84E-01 | no |
| A530099J19Ril | 0.00  | 0.07  | 1.79769e+ | 4.84E-01 | no |
| Accn5         | 0.00  | 0.09  | 1.79769e+ | 4.84E-01 | no |
| Apod          | 0.00  | 0.08  | 1.79769e+ | 4.84E-01 | no |
| Arnt2         | 0.00  | 0.02  | 1.79769e+ | 4.84E-01 | no |
| Cfc1          | 0.00  | 0.13  | 1.79769e+ | 4.84E-01 | no |
| Clec1a        | 0.00  | 0.05  | 1.79769e+ | 4.84E-01 | no |
| Clec4g        | 0.00  | 0.10  | 1.79769e+ | 4.84E-01 | no |
| Crtac1        | 0.00  | 0.05  | 1.79769e+ | 4.84E-01 | no |
| D6Erttd474e   | 0.00  | 0.06  | 1.79769e+ | 4.84E-01 | no |
| Dok6          | 0.00  | 0.13  | 1.79769e+ | 4.84E-01 | no |
| Ear7          | 0.00  | 0.39  | 1.79769e+ | 4.84E-01 | no |
| Egr4          | 0.00  | 0.06  | 1.79769e+ | 4.84E-01 | no |
| Fabp2         | 0.00  | 0.21  | 1.79769e+ | 4.84E-01 | no |
| Fam179a       | 0.00  | 0.03  | 1.79769e+ | 4.84E-01 | no |
| Fam46b        | 0.00  | 0.06  | 1.79769e+ | 4.84E-01 | no |
| Fam71f1       | 0.00  | 0.08  | 1.79769e+ | 4.84E-01 | no |
| Gdpd4         | 0.00  | 0.05  | 1.79769e+ | 4.84E-01 | no |
| Gm1965        | 0.00  | 0.14  | 1.79769e+ | 4.84E-01 | no |
| Gm7173        | 0.00  | 0.07  | 1.79769e+ | 4.84E-01 | no |
| Gm98          | 0.00  | 0.02  | 1.79769e+ | 4.84E-01 | no |
| Greb1         | 0.00  | 0.02  | 1.79769e+ | 4.84E-01 | no |
| Hoga1         | 0.00  | 0.08  | 1.79769e+ | 4.84E-01 | no |
| Hoxa11        | 0.00  | 0.06  | 1.79769e+ | 4.84E-01 | no |
| Hrh4          | 0.00  | 0.11  | 1.79769e+ | 4.84E-01 | no |
| Itln1         | 0.00  | 0.11  | 1.79769e+ | 4.84E-01 | no |
| Klhl29        | 0.00  | 0.02  | 1.79769e+ | 4.84E-01 | no |
| Lgals12       | 0.00  | 0.05  | 1.79769e+ | 4.84E-01 | no |
| Lims2         | 0.00  | 0.08  | 1.79769e+ | 4.84E-01 | no |
| Loxl1         | 0.00  | 0.04  | 1.79769e+ | 4.84E-01 | no |

|              |       |       |            |          |    |
|--------------|-------|-------|------------|----------|----|
| Nhlrc4       | 0.00  | 0.07  | 1.79769e+  | 4.84E-01 | no |
| Nlrp6        | 0.00  | 0.03  | 1.79769e+  | 4.84E-01 | no |
| Noto         | 0.00  | 0.09  | 1.79769e+  | 4.84E-01 | no |
| Oc90         | 0.00  | 0.07  | 1.79769e+  | 4.84E-01 | no |
| Procr        | 0.00  | 0.09  | 1.79769e+  | 4.84E-01 | no |
| Prr15l       | 0.00  | 0.09  | 1.79769e+  | 4.84E-01 | no |
| Ptchd3       | 0.00  | 0.06  | 1.79769e+  | 4.84E-01 | no |
| S100a14      | 0.00  | 0.12  | 1.79769e+  | 4.84E-01 | no |
| Scrn1        | 0.00  | 0.07  | 1.79769e+  | 4.84E-01 | no |
| Serpina3c    | 0.00  | 0.07  | 1.79769e+  | 4.84E-01 | no |
| Slc24a3      | 0.00  | 0.04  | 1.79769e+  | 4.84E-01 | no |
| Slc5a10      | 0.00  | 0.06  | 1.79769e+  | 4.84E-01 | no |
| Spire2       | 0.00  | 0.05  | 1.79769e+  | 4.84E-01 | no |
| Tcf15        | 0.00  | 0.13  | 1.79769e+  | 4.84E-01 | no |
| Tnxb         | 0.00  | 0.01  | 1.79769e+  | 4.84E-01 | no |
| Vmn2r105     | 0.00  | 0.08  | 1.79769e+  | 4.84E-01 | no |
| 4933405L10Ri | 0.12  | 0.00  | -1.79769e- | 4.84E-01 | no |
| Defb47       | 0.48  | 0.00  | -1.79769e- | 4.84E-01 | no |
| Gal          | 0.21  | 0.00  | -1.79769e- | 4.84E-01 | no |
| Hist1h2bp    | 0.26  | 0.00  | -1.79769e- | 4.84E-01 | no |
| Hsd17b13     | 0.13  | 0.00  | -1.79769e- | 4.84E-01 | no |
| Efna1        | 0.13  | 0.00  | -1.79769e- | 4.84E-01 | no |
| Ntn4         | 0.03  | 0.00  | -1.79769e- | 4.84E-01 | no |
| Bcam         | 0.03  | 0.19  | 2.77       | 4.84E-01 | no |
| Rnf208       | 0.11  | 0.49  | 2.09       | 4.84E-01 | no |
| Sgca         | 0.15  | 0.49  | 1.67       | 4.84E-01 | no |
| Dram1        | 0.30  | 0.57  | 0.95       | 4.84E-01 | no |
| Lilrb4       | 0.99  | 1.77  | 0.83       | 4.84E-01 | no |
| Efcab4b      | 2.68  | 4.29  | 0.68       | 4.84E-01 | no |
| Chrnbl       | 2.67  | 4.12  | 0.63       | 4.84E-01 | no |
| 6330409N04Ri | 3.60  | 5.54  | 0.62       | 4.84E-01 | no |
| Mt1          | 11.87 | 17.94 | 0.60       | 4.84E-01 | no |
| Fan1         | 2.19  | 3.25  | 0.57       | 4.84E-01 | no |
| BC067068     | 5.59  | 8.05  | 0.52       | 4.84E-01 | no |
| Pdk2         | 6.59  | 9.20  | 0.48       | 4.84E-01 | no |
| Degs1        | 10.98 | 14.97 | 0.45       | 4.84E-01 | no |
| Zscan20      | 3.72  | 5.05  | 0.44       | 4.84E-01 | no |
| 2010300C02Ri | 6.81  | 8.95  | 0.39       | 4.84E-01 | no |
| Tcp11l2      | 15.75 | 20.50 | 0.38       | 4.84E-01 | no |
| Tcfe3        | 8.87  | 11.54 | 0.38       | 4.84E-01 | no |
| Atxn7l1      | 15.50 | 19.74 | 0.35       | 4.84E-01 | no |
| Atp6v1b2     | 24.29 | 30.50 | 0.33       | 4.84E-01 | no |



|          |        |        |       |          |    |
|----------|--------|--------|-------|----------|----|
| Zer1     | 23.43  | 29.10  | 0.31  | 4.84E-01 | no |
| Tra2a    | 62.70  | 77.62  | 0.31  | 4.84E-01 | no |
| Mesdc1   | 29.18  | 36.05  | 0.30  | 4.84E-01 | no |
| Ncoa2    | 27.34  | 33.21  | 0.28  | 4.84E-01 | no |
| Prrc2a   | 79.82  | 68.64  | -0.22 | 4.84E-01 | no |
| Ddx24    | 49.31  | 40.43  | -0.29 | 4.84E-01 | no |
| Raver1   | 62.98  | 51.35  | -0.29 | 4.84E-01 | no |
| Spn      | 16.58  | 13.50  | -0.30 | 4.84E-01 | no |
| Eprs     | 35.61  | 28.99  | -0.30 | 4.84E-01 | no |
| Bzw1     | 96.14  | 78.27  | -0.30 | 4.84E-01 | no |
| Mcart1   | 57.92  | 47.12  | -0.30 | 4.84E-01 | no |
| Ywhab    | 76.83  | 62.49  | -0.30 | 4.84E-01 | no |
| Ppp1ca   | 181.18 | 147.34 | -0.30 | 4.84E-01 | no |
| Setd1a   | 29.44  | 23.92  | -0.30 | 4.84E-01 | no |
| Sf3b4    | 80.01  | 64.73  | -0.31 | 4.84E-01 | no |
| Eef1a1   | 257.34 | 208.11 | -0.31 | 4.84E-01 | no |
| Mogs     | 40.24  | 32.48  | -0.31 | 4.84E-01 | no |
| Glul     | 51.77  | 41.72  | -0.31 | 4.84E-01 | no |
| Ppig     | 19.96  | 16.07  | -0.31 | 4.84E-01 | no |
| Cfl1     | 534.00 | 428.95 | -0.32 | 4.84E-01 | no |
| Kras     | 28.00  | 22.48  | -0.32 | 4.84E-01 | no |
| Eif2s1   | 33.48  | 26.82  | -0.32 | 4.84E-01 | no |
| Ruvbl1   | 44.54  | 35.41  | -0.33 | 4.84E-01 | no |
| Eif2ak1  | 25.38  | 20.06  | -0.34 | 4.84E-01 | no |
| Mctp2    | 12.33  | 9.74   | -0.34 | 4.84E-01 | no |
| Pdap1    | 26.90  | 21.16  | -0.35 | 4.84E-01 | no |
| Pip4k2a  | 20.71  | 16.28  | -0.35 | 4.84E-01 | no |
| Mpp5     | 12.47  | 9.76   | -0.35 | 4.84E-01 | no |
| Tbl2     | 14.21  | 11.12  | -0.35 | 4.84E-01 | no |
| Galk1    | 32.72  | 25.43  | -0.36 | 4.84E-01 | no |
| Zfp161   | 16.21  | 12.59  | -0.36 | 4.84E-01 | no |
| Klhdc4   | 22.64  | 17.58  | -0.36 | 4.84E-01 | no |
| Ndufa9   | 40.83  | 31.66  | -0.37 | 4.84E-01 | no |
| Cdc34    | 35.12  | 27.13  | -0.37 | 4.84E-01 | no |
| Taf3     | 9.87   | 7.62   | -0.37 | 4.84E-01 | no |
| Psm11    | 27.17  | 20.94  | -0.38 | 4.84E-01 | no |
| AI597479 | 13.15  | 9.97   | -0.40 | 4.84E-01 | no |
| Spred1   | 11.73  | 8.71   | -0.43 | 4.84E-01 | no |
| Pmm1     | 14.53  | 10.30  | -0.50 | 4.84E-01 | no |
| Ttc32    | 20.53  | 14.48  | -0.50 | 4.84E-01 | no |
| Siah1b   | 11.27  | 7.91   | -0.51 | 4.84E-01 | no |
| Sntb2    | 2.99   | 2.03   | -0.56 | 4.84E-01 | no |

|             |        |       |           |          |    |
|-------------|--------|-------|-----------|----------|----|
| Csad        | 5.26   | 3.56  | -0.56     | 4.84E-01 | no |
| Tdrkh       | 4.42   | 2.96  | -0.58     | 4.84E-01 | no |
| Hlx         | 3.54   | 2.31  | -0.61     | 4.84E-01 | no |
| B3gnt7      | 3.19   | 2.06  | -0.63     | 4.84E-01 | no |
| Dcbld2      | 0.99   | 0.62  | -0.67     | 4.84E-01 | no |
| BC028528    | 13.62  | 8.55  | -0.67     | 4.84E-01 | no |
| Slc39a2     | 0.70   | 0.36  | -0.97     | 4.84E-01 | no |
| Fcrlb       | 0.53   | 0.06  | -3.28     | 4.84E-01 | no |
| Wdfy1       | 7.52   | 9.87  | 0.39      | 4.85E-01 | no |
| Naa15       | 34.71  | 28.25 | -0.30     | 4.85E-01 | no |
| Mmgt1       | 18.39  | 14.44 | -0.35     | 4.85E-01 | no |
| Abi3bp      | 0.00   | 0.04  | 1.79769e+ | 4.85E-01 | no |
| Cd209d      | 0.00   | 0.16  | 1.79769e+ | 4.85E-01 | no |
| Fbln5       | 0.00   | 0.03  | 1.79769e+ | 4.85E-01 | no |
| Gm4371      | 0.00   | 0.09  | 1.79769e+ | 4.85E-01 | no |
| Pawr        | 0.00   | 0.08  | 1.79769e+ | 4.85E-01 | no |
| Gpmb        | 0.02   | 0.17  | 2.81      | 4.85E-01 | no |
| Atp7b       | 0.11   | 0.23  | 1.09      | 4.85E-01 | no |
| Ccdc33      | 0.44   | 0.84  | 0.93      | 4.85E-01 | no |
| Napb        | 0.35   | 0.64  | 0.87      | 4.85E-01 | no |
| Fhit        | 1.33   | 2.35  | 0.82      | 4.85E-01 | no |
| D16Ert472e  | 10.31  | 13.07 | 0.34      | 4.85E-01 | no |
| 2010321M09R | 22.15  | 17.68 | -0.32     | 4.85E-01 | no |
| Cox6a1      | 119.13 | 94.18 | -0.34     | 4.85E-01 | no |
| Hspe1       | 74.48  | 58.26 | -0.35     | 4.85E-01 | no |
| Ptcd3       | 23.19  | 18.13 | -0.35     | 4.85E-01 | no |
| Mrpl28      | 36.23  | 27.77 | -0.38     | 4.85E-01 | no |
| 3200002M19R | 28.99  | 21.14 | -0.46     | 4.85E-01 | no |
| Pinx1       | 10.89  | 7.61  | -0.52     | 4.85E-01 | no |
| Ust         | 2.94   | 1.95  | -0.59     | 4.85E-01 | no |
| Hsd17b11    | 15.63  | 20.83 | 0.41      | 4.85E-01 | no |
| Rpn2        | 46.60  | 37.78 | -0.30     | 4.85E-01 | no |
| B3galnt1    | 0.00   | 0.08  | 1.79769e+ | 4.85E-01 | no |
| BC048546    | 0.00   | 0.03  | 1.79769e+ | 4.85E-01 | no |
| Fcgr4       | 0.00   | 0.12  | 1.79769e+ | 4.85E-01 | no |
| Gpr15       | 0.00   | 0.12  | 1.79769e+ | 4.85E-01 | no |
| Gtsf1l      | 0.00   | 0.16  | 1.79769e+ | 4.85E-01 | no |
| Myo5b       | 0.00   | 0.02  | 1.79769e+ | 4.85E-01 | no |
| Obsl1       | 0.00   | 0.02  | 1.79769e+ | 4.85E-01 | no |
| Park2       | 0.00   | 0.05  | 1.79769e+ | 4.85E-01 | no |
| Slc6a20b    | 0.00   | 0.05  | 1.79769e+ | 4.85E-01 | no |
| Tecta       | 0.00   | 0.02  | 1.79769e+ | 4.85E-01 | no |

|              |        |        |           |          |    |
|--------------|--------|--------|-----------|----------|----|
| Tmc2         | 0.00   | 0.04   | 1.79769e+ | 4.85E-01 | no |
| Por          | 13.51  | 17.49  | 0.37      | 4.85E-01 | no |
| Rab7         | 85.13  | 107.27 | 0.33      | 4.85E-01 | no |
| Hivep2       | 18.20  | 22.44  | 0.30      | 4.85E-01 | no |
| Srsf11       | 64.43  | 55.68  | -0.21     | 4.85E-01 | no |
| Mlf2         | 48.30  | 38.93  | -0.31     | 4.85E-01 | no |
| Rsl24d1      | 52.36  | 41.61  | -0.33     | 4.85E-01 | no |
| Suv39h2      | 8.89   | 6.49   | -0.45     | 4.85E-01 | no |
| Rgs7bp       | 0.57   | 0.33   | -0.77     | 4.85E-01 | no |
| Snrpe        | 69.50  | 51.77  | -0.42     | 4.86E-01 | no |
| Zyg11b       | 12.09  | 14.94  | 0.30      | 4.86E-01 | no |
| Myst4        | 7.05   | 8.95   | 0.34      | 4.86E-01 | no |
| Spns1        | 13.45  | 17.37  | 0.37      | 4.87E-01 | no |
| Ppil4        | 26.75  | 21.24  | -0.33     | 4.87E-01 | no |
| Eed          | 33.04  | 26.14  | -0.34     | 4.87E-01 | no |
| Ints5        | 25.53  | 20.42  | -0.32     | 4.87E-01 | no |
| Zfp652       | 13.04  | 16.86  | 0.37      | 4.87E-01 | no |
| Csf3r        | 1.32   | 2.07   | 0.64      | 4.87E-01 | no |
| Pnck         | 0.15   | 0.47   | 1.63      | 4.87E-01 | no |
| Lztf11       | 6.80   | 9.27   | 0.45      | 4.87E-01 | no |
| 5830405N20Ri | 13.15  | 17.61  | 0.42      | 4.87E-01 | no |
| Peci         | 18.51  | 23.92  | 0.37      | 4.87E-01 | no |
| Stxbp1       | 8.04   | 6.08   | -0.40     | 4.87E-01 | no |
| Tsc1         | 12.70  | 15.70  | 0.31      | 4.87E-01 | no |
| Atp5b        | 183.70 | 149.90 | -0.29     | 4.87E-01 | no |
| Ftsj3        | 29.87  | 24.01  | -0.32     | 4.87E-01 | no |
| Ccbe1        | 0.10   | 0.21   | 1.06      | 4.88E-01 | no |
| Tom1l1       | 0.37   | 0.72   | 0.95      | 4.88E-01 | no |
| Daam1        | 1.48   | 2.18   | 0.55      | 4.88E-01 | no |
| 2310035C23Ri | 12.53  | 15.41  | 0.30      | 4.88E-01 | no |
| Vav3         | 12.71  | 10.03  | -0.34     | 4.88E-01 | no |
| Exosc2       | 26.79  | 20.66  | -0.38     | 4.88E-01 | no |
| Ing3         | 12.61  | 9.66   | -0.38     | 4.88E-01 | no |
| C230052I12Ri | 14.04  | 10.27  | -0.45     | 4.88E-01 | no |
| Hbb-b2       | 2.56   | 0.05   | -5.76     | 4.88E-01 | no |
| Prep         | 89.64  | 109.93 | 0.29      | 4.88E-01 | no |
| 2810030E01Ri | 0.28   | 0.13   | -1.05     | 4.88E-01 | no |
| Rpl3         | 126.92 | 103.50 | -0.29     | 4.89E-01 | no |
| Rarg         | 0.10   | 0.27   | 1.39      | 4.89E-01 | no |
| 2700094K13Ri | 88.33  | 70.87  | -0.32     | 4.89E-01 | no |
| Cyp46a1      | 0.27   | 0.06   | -2.07     | 4.89E-01 | no |
| Rbbp5        | 27.12  | 21.80  | -0.31     | 4.89E-01 | no |

|               |       |       |           |          |    |
|---------------|-------|-------|-----------|----------|----|
| Fam98c        | 10.86 | 15.12 | 0.48      | 4.90E-01 | no |
| Ace           | 0.13  | 0.03  | -2.19     | 4.90E-01 | no |
| Rfx1          | 15.84 | 12.60 | -0.33     | 4.90E-01 | no |
| Cnih          | 39.60 | 30.76 | -0.36     | 4.90E-01 | no |
| 2210411K11Ri  | 3.84  | 2.36  | -0.70     | 4.90E-01 | no |
| Fhl4          | 0.55  | 0.99  | 0.84      | 4.90E-01 | no |
| Espnl         | 0.04  | 0.12  | 1.51      | 4.91E-01 | no |
| Cd53          | 43.25 | 34.69 | -0.32     | 4.91E-01 | no |
| Nat6          | 7.67  | 10.52 | 0.45      | 4.92E-01 | no |
| Cbfa2t2       | 15.21 | 12.44 | -0.29     | 4.92E-01 | no |
| Cux1          | 50.84 | 59.34 | 0.22      | 4.92E-01 | no |
| Armc1         | 25.50 | 20.20 | -0.34     | 4.92E-01 | no |
| Snrpb2        | 37.13 | 28.30 | -0.39     | 4.92E-01 | no |
| Rgs18         | 4.53  | 2.91  | -0.64     | 4.93E-01 | no |
| Naa25         | 14.61 | 11.27 | -0.37     | 4.93E-01 | no |
| Xlr4c         | 4.23  | 6.48  | 0.62      | 4.94E-01 | no |
| A530032D15R   | 2.35  | 3.71  | 0.65      | 4.94E-01 | no |
| Gna12         | 13.19 | 17.40 | 0.40      | 4.94E-01 | no |
| Fam69a        | 10.96 | 8.06  | -0.44     | 4.94E-01 | no |
| Bcl2a1b       | 0.85  | 0.26  | -1.71     | 4.94E-01 | no |
| Ctnna1        | 27.90 | 22.50 | -0.31     | 4.94E-01 | no |
| Btbd10        | 20.90 | 16.24 | -0.36     | 4.95E-01 | no |
| Trpm4         | 1.05  | 1.62  | 0.63      | 4.95E-01 | no |
| Apitd1        | 27.69 | 20.56 | -0.43     | 4.95E-01 | no |
| Ccdc22        | 13.82 | 17.83 | 0.37      | 4.95E-01 | no |
| Chordc1       | 43.38 | 34.77 | -0.32     | 4.95E-01 | no |
| Pgd           | 34.60 | 27.69 | -0.32     | 4.96E-01 | no |
| Itpkc         | 3.48  | 4.92  | 0.50      | 4.96E-01 | no |
| Mutyh         | 10.07 | 7.21  | -0.48     | 4.97E-01 | no |
| Elfn2         | 0.25  | 0.12  | -1.00     | 4.97E-01 | no |
| Reps2         | 0.03  | 0.09  | 1.73      | 4.97E-01 | no |
| Hba-a2        | 3.13  | 1.49  | -1.07     | 4.97E-01 | no |
| 4921515J06Ril | 0.07  | 0.00  | -1.79769e | 4.97E-01 | no |
| Adad1         | 0.07  | 0.00  | -1.79769e | 4.97E-01 | no |
| Cyp2s1        | 0.05  | 0.00  | -1.79769e | 4.97E-01 | no |
| Fkbp9         | 0.04  | 0.00  | -1.79769e | 4.97E-01 | no |
| Gdf3          | 0.07  | 0.00  | -1.79769e | 4.97E-01 | no |
| Igsf5         | 0.08  | 0.00  | -1.79769e | 4.97E-01 | no |
| Rfpl4         | 0.10  | 0.00  | -1.79769e | 4.97E-01 | no |
| Sel1l3        | 0.03  | 0.00  | -1.79769e | 4.97E-01 | no |
| Sult5a1       | 0.10  | 0.00  | -1.79769e | 4.97E-01 | no |
| Tdrd5         | 0.04  | 0.00  | -1.79769e | 4.97E-01 | no |

|              |        |       |           |          |    |
|--------------|--------|-------|-----------|----------|----|
| Thbs4        | 0.03   | 0.00  | -1.79769e | 4.97E-01 | no |
| Tspan7       | 0.08   | 0.00  | -1.79769e | 4.97E-01 | no |
| Ln timer     | 7.75   | 10.01 | 0.37      | 4.97E-01 | no |
| Ecd          | 22.25  | 17.70 | -0.33     | 4.97E-01 | no |
| Yeats4       | 38.66  | 30.29 | -0.35     | 4.97E-01 | no |
| Gstcd        | 13.11  | 9.91  | -0.40     | 4.97E-01 | no |
| Psmc3ip      | 15.96  | 11.22 | -0.51     | 4.97E-01 | no |
| Utp14b       | 4.71   | 3.28  | -0.52     | 4.97E-01 | no |
| Bmpr2        | 2.56   | 3.75  | 0.55      | 4.97E-01 | no |
| Ccdc158      | 0.17   | 0.02  | -3.18     | 4.97E-01 | no |
| Mre11a       | 17.62  | 13.78 | -0.35     | 4.97E-01 | no |
| 1700058G18Ri | 0.15   | 0.00  | -1.79769e | 4.98E-01 | no |
| Trim30a      | 33.47  | 41.43 | 0.31      | 4.98E-01 | no |
| Fam64a       | 34.35  | 27.02 | -0.35     | 4.98E-01 | no |
| Abcb6        | 6.16   | 4.39  | -0.49     | 4.98E-01 | no |
| Skiv2l2      | 32.77  | 26.49 | -0.31     | 4.98E-01 | no |
| Wdyhv1       | 19.66  | 14.43 | -0.45     | 4.98E-01 | no |
| Gkap1        | 2.92   | 4.47  | 0.61      | 4.98E-01 | no |
| Mapk1        | 73.54  | 62.11 | -0.24     | 4.98E-01 | no |
| Brms1l       | 14.16  | 10.71 | -0.40     | 4.98E-01 | no |
| Camk1        | 0.67   | 1.21  | 0.86      | 4.98E-01 | no |
| Mtftp1       | 5.13   | 3.33  | -0.62     | 4.98E-01 | no |
| Nkx6-2       | 0.00   | 0.07  | 1.79769e+ | 4.98E-01 | no |
| Mthfd2l      | 1.07   | 1.76  | 0.72      | 4.98E-01 | no |
| Slc35b3      | 10.03  | 13.63 | 0.44      | 4.98E-01 | no |
| Tes          | 18.22  | 23.28 | 0.35      | 4.98E-01 | no |
| Kctd5        | 18.97  | 14.68 | -0.37     | 4.98E-01 | no |
| Zfp947       | 2.32   | 3.53  | 0.61      | 4.98E-01 | no |
| Rps2         | 3.10   | 1.85  | -0.74     | 4.99E-01 | no |
| Phldb1       | 1.39   | 2.05  | 0.56      | 4.99E-01 | no |
| Qrfp         | 0.26   | 0.10  | -1.41     | 4.99E-01 | no |
| Fsd2         | 0.16   | 0.35  | 1.12      | 4.99E-01 | no |
| Dtx3l        | 20.23  | 25.00 | 0.31      | 4.99E-01 | no |
| Cand1        | 25.99  | 21.26 | -0.29     | 4.99E-01 | no |
| Efna5        | 0.00   | 0.04  | 1.79769e+ | 5.00E-01 | no |
| Cnpy4        | 15.94  | 11.87 | -0.42     | 5.00E-01 | no |
| Parp9        | 15.72  | 19.81 | 0.33      | 5.00E-01 | no |
| Fzd7         | 0.83   | 1.30  | 0.66      | 5.00E-01 | no |
| Pgls         | 111.89 | 90.69 | -0.30     | 5.00E-01 | no |
| Prkrip1      | 9.07   | 6.40  | -0.50     | 5.00E-01 | no |
| Tspan33      | 0.30   | 0.11  | -1.48     | 5.00E-01 | no |
| Ddx21        | 47.06  | 38.59 | -0.29     | 5.01E-01 | no |

|              |        |        |       |          |    |
|--------------|--------|--------|-------|----------|----|
| Mapk14       | 52.61  | 45.27  | -0.22 | 5.01E-01 | no |
| Celf2        | 56.63  | 50.08  | -0.18 | 5.01E-01 | no |
| Hspa9        | 63.68  | 52.15  | -0.29 | 5.01E-01 | no |
| Tubgcp6      | 18.16  | 14.78  | -0.30 | 5.01E-01 | no |
| Gm10516      | 0.28   | 0.10   | -1.47 | 5.02E-01 | no |
| 2010002N04Ri | 7.10   | 4.94   | -0.52 | 5.02E-01 | no |
| Gpm6a        | 0.16   | 0.04   | -1.86 | 5.02E-01 | no |
| Hn1          | 104.30 | 85.06  | -0.29 | 5.03E-01 | no |
| Hspg2        | 0.06   | 0.02   | -1.22 | 5.03E-01 | no |
| Actr1a       | 45.11  | 36.72  | -0.30 | 5.03E-01 | no |
| Colq         | 18.95  | 14.88  | -0.35 | 5.03E-01 | no |
| Exosc3       | 39.39  | 30.22  | -0.38 | 5.03E-01 | no |
| Rps4x        | 151.42 | 123.27 | -0.30 | 5.04E-01 | no |
| 1810033B17Ri | 0.31   | 0.73   | 1.24  | 5.04E-01 | no |
| Ankrd23      | 4.76   | 6.80   | 0.51  | 5.04E-01 | no |
| 2310061C15Ri | 20.27  | 15.07  | -0.43 | 5.04E-01 | no |
| Endog        | 5.74   | 3.71   | -0.63 | 5.04E-01 | no |
| Pyroxd2      | 0.10   | 0.26   | 1.32  | 5.05E-01 | no |
| Gfod2        | 2.43   | 3.68   | 0.60  | 5.05E-01 | no |
| Ywhaz        | 232.21 | 186.43 | -0.32 | 5.05E-01 | no |
| Ssbp1        | 21.97  | 16.43  | -0.42 | 5.05E-01 | no |
| Yeats2       | 21.20  | 17.83  | -0.25 | 5.05E-01 | no |
| Agbl1        | 0.15   | 0.03   | -2.22 | 5.05E-01 | no |
| Gm12942      | 5.97   | 8.95   | 0.58  | 5.06E-01 | no |
| Xrcc4        | 4.93   | 7.27   | 0.56  | 5.06E-01 | no |
| Ocrl         | 3.53   | 4.83   | 0.45  | 5.06E-01 | no |
| Ppp1r3e      | 2.33   | 3.56   | 0.61  | 5.06E-01 | no |
| Rabggta      | 6.93   | 9.41   | 0.44  | 5.06E-01 | no |
| Macf1        | 22.35  | 25.97  | 0.22  | 5.06E-01 | no |
| Foxk2        | 21.69  | 17.61  | -0.30 | 5.06E-01 | no |
| Rrp1b        | 12.95  | 10.45  | -0.31 | 5.06E-01 | no |
| Fam108a      | 53.04  | 42.65  | -0.31 | 5.06E-01 | no |
| Isy1         | 31.80  | 24.94  | -0.35 | 5.06E-01 | no |
| Metrn        | 27.28  | 20.91  | -0.38 | 5.06E-01 | no |
| Ubiad1       | 8.80   | 6.50   | -0.44 | 5.06E-01 | no |
| Wdr70        | 9.33   | 6.75   | -0.47 | 5.06E-01 | no |
| Arg1         | 0.33   | 0.07   | -2.21 | 5.06E-01 | no |
| Flot2        | 12.66  | 16.19  | 0.35  | 5.06E-01 | no |
| Imp2l        | 1.02   | 1.83   | 0.84  | 5.07E-01 | no |
| Arhgef6      | 17.08  | 21.25  | 0.32  | 5.07E-01 | no |
| Tia1         | 43.86  | 36.78  | -0.25 | 5.07E-01 | no |
| Map1lc3b     | 51.50  | 63.54  | 0.30  | 5.07E-01 | no |

|              |        |        |            |          |    |
|--------------|--------|--------|------------|----------|----|
| Ap3d1        | 25.99  | 31.80  | 0.29       | 5.07E-01 | no |
| Dcaf12       | 33.92  | 27.55  | -0.30      | 5.07E-01 | no |
| Tmem59l      | 1.96   | 1.18   | -0.74      | 5.07E-01 | no |
| Pkib         | 1.04   | 1.62   | 0.64       | 5.08E-01 | no |
| Anxa7        | 15.31  | 19.33  | 0.34       | 5.08E-01 | no |
| 5730507C01Ri | 0.06   | 0.00   | -1.79769e- | 5.09E-01 | no |
| Sox15        | 1.11   | 2.10   | 0.92       | 5.10E-01 | no |
| Rcor1        | 32.86  | 26.50  | -0.31      | 5.10E-01 | no |
| Gm4532       | 3.66   | 2.22   | -0.72      | 5.10E-01 | no |
| Lrrc16b      | 0.10   | 0.03   | -1.69      | 5.10E-01 | no |
| Osbpl9       | 43.26  | 36.66  | -0.24      | 5.10E-01 | no |
| Met          | 0.19   | 0.09   | -1.03      | 5.10E-01 | no |
| Pcbd2        | 16.95  | 11.45  | -0.57      | 5.10E-01 | no |
| Cd37         | 111.49 | 136.62 | 0.29       | 5.11E-01 | no |
| Chchd2       | 95.57  | 77.14  | -0.31      | 5.11E-01 | no |
| Ms4a4c       | 1.73   | 2.94   | 0.76       | 5.11E-01 | no |
| Inca1        | 0.15   | 0.45   | 1.55       | 5.11E-01 | no |
| Tbl3         | 21.99  | 17.38  | -0.34      | 5.11E-01 | no |
| Irak2        | 1.31   | 2.05   | 0.65       | 5.11E-01 | no |
| Sdcbp2       | 0.16   | 0.44   | 1.49       | 5.11E-01 | no |
| Dyrk1b       | 14.02  | 17.83  | 0.35       | 5.11E-01 | no |
| Camk2n2      | 1.84   | 1.07   | -0.78      | 5.11E-01 | no |
| 4933421O10Ri | 2.76   | 3.95   | 0.52       | 5.12E-01 | no |
| Smad3        | 15.10  | 12.05  | -0.33      | 5.12E-01 | no |
| Ctdspl2      | 27.07  | 21.95  | -0.30      | 5.12E-01 | no |
| Mast4        | 4.35   | 3.39   | -0.36      | 5.12E-01 | no |
| Bclaf1       | 53.03  | 46.40  | -0.19      | 5.13E-01 | no |
| Oas3         | 3.01   | 4.18   | 0.47       | 5.13E-01 | no |
| Nop56        | 75.45  | 61.74  | -0.29      | 5.13E-01 | no |
| 1700017B05Ri | 20.14  | 16.36  | -0.30      | 5.13E-01 | no |
| Pdhb         | 53.78  | 43.18  | -0.32      | 5.13E-01 | no |
| Clec10a      | 0.12   | 0.42   | 1.83       | 5.13E-01 | no |
| Fam69b       | 1.49   | 2.49   | 0.74       | 5.13E-01 | no |
| LOC100499420 | 0.64   | 0.35   | -0.87      | 5.14E-01 | no |
| Dgkd         | 66.15  | 54.18  | -0.29      | 5.14E-01 | no |
| Fkbp3        | 44.36  | 34.24  | -0.37      | 5.14E-01 | no |
| Rpl35a       | 6.07   | 3.75   | -0.70      | 5.15E-01 | no |
| Pik3ap1      | 62.50  | 76.19  | 0.29       | 5.15E-01 | no |
| Taf1         | 22.43  | 18.39  | -0.29      | 5.16E-01 | no |
| Gatad2a      | 25.39  | 21.71  | -0.23      | 5.16E-01 | no |
| Neil1        | 42.25  | 33.22  | -0.35      | 5.16E-01 | no |
| Abca7        | 13.43  | 10.87  | -0.30      | 5.16E-01 | no |

|          |        |       |           |          |    |
|----------|--------|-------|-----------|----------|----|
| Chac2    | 3.56   | 2.22  | -0.68     | 5.16E-01 | no |
| Wdr47    | 4.72   | 3.39  | -0.48     | 5.16E-01 | no |
| Jhdm1d   | 6.89   | 8.65  | 0.33      | 5.16E-01 | no |
| Th1l     | 29.86  | 23.96 | -0.32     | 5.16E-01 | no |
| Fam98b   | 30.12  | 23.75 | -0.34     | 5.16E-01 | no |
| Amn1     | 3.78   | 5.98  | 0.66      | 5.17E-01 | no |
| Socs5    | 6.32   | 4.70  | -0.43     | 5.18E-01 | no |
| Msh2     | 38.49  | 31.40 | -0.29     | 5.18E-01 | no |
| Rhot1    | 15.98  | 12.99 | -0.30     | 5.19E-01 | no |
| Rheb     | 26.47  | 20.13 | -0.39     | 5.19E-01 | no |
| Hint3    | 6.68   | 10.20 | 0.61      | 5.20E-01 | no |
| Zbtb20   | 2.12   | 3.11  | 0.55      | 5.20E-01 | no |
| Tomm6    | 46.68  | 36.76 | -0.34     | 5.20E-01 | no |
| Amotl1   | 0.54   | 0.34  | -0.66     | 5.20E-01 | no |
| AA465934 | 26.47  | 18.12 | -0.55     | 5.20E-01 | no |
| Msh3     | 17.46  | 13.96 | -0.32     | 5.20E-01 | no |
| Bace1    | 8.87   | 11.25 | 0.34      | 5.21E-01 | no |
| Fam129b  | 5.74   | 4.22  | -0.45     | 5.21E-01 | no |
| Nars     | 37.42  | 31.15 | -0.26     | 5.21E-01 | no |
| Cd99l2   | 3.56   | 4.93  | 0.47      | 5.22E-01 | no |
| Mybbp1a  | 49.83  | 41.07 | -0.28     | 5.22E-01 | no |
| Sdha     | 61.03  | 50.17 | -0.28     | 5.22E-01 | no |
| Gtpbp4   | 26.19  | 20.88 | -0.33     | 5.22E-01 | no |
| Vps37c   | 12.03  | 15.57 | 0.37      | 5.22E-01 | no |
| Scd3     | 1.25   | 0.78  | -0.68     | 5.23E-01 | no |
| Tspan31  | 16.53  | 21.79 | 0.40      | 5.23E-01 | no |
| Cnbp     | 115.86 | 99.59 | -0.22     | 5.23E-01 | no |
| Cnot2    | 67.59  | 56.68 | -0.25     | 5.23E-01 | no |
| Lrrc58   | 47.61  | 39.11 | -0.28     | 5.23E-01 | no |
| Zc3h6    | 4.82   | 6.40  | 0.41      | 5.24E-01 | no |
| Psd4     | 22.30  | 27.32 | 0.29      | 5.24E-01 | no |
| Dnmt3l   | 0.00   | 0.05  | 1.79769e+ | 5.24E-01 | no |
| Hils1    | 0.00   | 0.12  | 1.79769e+ | 5.24E-01 | no |
| Asb4     | 0.00   | 0.04  | 1.79769e+ | 5.24E-01 | no |
| Cldn3    | 0.00   | 0.08  | 1.79769e+ | 5.24E-01 | no |
| Cnnm1    | 0.00   | 0.02  | 1.79769e+ | 5.24E-01 | no |
| Cpt1c    | 0.00   | 0.04  | 1.79769e+ | 5.24E-01 | no |
| Fscn3    | 0.00   | 0.06  | 1.79769e+ | 5.24E-01 | no |
| Galnt5   | 0.00   | 0.03  | 1.79769e+ | 5.24E-01 | no |
| Il23a    | 0.00   | 0.08  | 1.79769e+ | 5.24E-01 | no |
| Kif26b   | 0.00   | 0.01  | 1.79769e+ | 5.24E-01 | no |
| Klhl33   | 0.00   | 0.06  | 1.79769e+ | 5.24E-01 | no |



|               |        |       |           |          |    |
|---------------|--------|-------|-----------|----------|----|
| Lin7b         | 0.00   | 0.13  | 1.79769e+ | 5.24E-01 | no |
| Mapk13        | 0.00   | 0.07  | 1.79769e+ | 5.24E-01 | no |
| Myh3          | 0.00   | 0.01  | 1.79769e+ | 5.24E-01 | no |
| Stc2          | 0.00   | 0.05  | 1.79769e+ | 5.24E-01 | no |
| Tie1          | 0.00   | 0.03  | 1.79769e+ | 5.24E-01 | no |
| P2ry12        | 0.29   | 0.59  | 1.02      | 5.24E-01 | no |
| Gnpda2        | 9.06   | 12.54 | 0.47      | 5.24E-01 | no |
| Chmp2b        | 20.46  | 26.25 | 0.36      | 5.24E-01 | no |
| Lax1          | 15.03  | 19.27 | 0.36      | 5.24E-01 | no |
| Golim4        | 8.64   | 11.01 | 0.35      | 5.24E-01 | no |
| Tcf4          | 28.89  | 24.31 | -0.25     | 5.24E-01 | no |
| Wars          | 31.61  | 26.25 | -0.27     | 5.24E-01 | no |
| Sfpq          | 115.47 | 94.89 | -0.28     | 5.24E-01 | no |
| Paip2         | 98.73  | 80.73 | -0.29     | 5.24E-01 | no |
| Mllt1         | 26.34  | 21.45 | -0.30     | 5.24E-01 | no |
| Cyc1          | 60.39  | 48.52 | -0.32     | 5.24E-01 | no |
| Ythdc2        | 9.62   | 7.59  | -0.34     | 5.24E-01 | no |
| Mlst8         | 14.55  | 11.42 | -0.35     | 5.24E-01 | no |
| Rfc3          | 37.83  | 29.64 | -0.35     | 5.24E-01 | no |
| Pias3         | 12.15  | 9.48  | -0.36     | 5.24E-01 | no |
| Mrps7         | 32.46  | 25.28 | -0.36     | 5.24E-01 | no |
| Cnn2          | 23.21  | 17.99 | -0.37     | 5.24E-01 | no |
| Tmem188       | 23.55  | 18.04 | -0.38     | 5.24E-01 | no |
| Stom          | 8.46   | 6.20  | -0.45     | 5.24E-01 | no |
| Fam113a       | 8.10   | 5.76  | -0.49     | 5.24E-01 | no |
| Gh            | 1.00   | 0.42  | -1.25     | 5.24E-01 | no |
| Gm6981        | 0.37   | 0.06  | -2.53     | 5.24E-01 | no |
| Dpysl2        | 9.53   | 7.36  | -0.37     | 5.24E-01 | no |
| Dennd3        | 3.87   | 2.83  | -0.45     | 5.24E-01 | no |
| Myh7          | 0.00   | 0.01  | 1.79769e+ | 5.25E-01 | no |
| 6330406I15Rik | 0.00   | 0.04  | 1.79769e+ | 5.25E-01 | no |
| Asphd1        | 0.00   | 0.21  | 1.79769e+ | 5.25E-01 | no |
| Cdcp1         | 0.00   | 0.03  | 1.79769e+ | 5.25E-01 | no |
| Dok7          | 0.00   | 0.04  | 1.79769e+ | 5.25E-01 | no |
| Dpep2         | 0.00   | 0.06  | 1.79769e+ | 5.25E-01 | no |
| F630042J09Rik | 0.00   | 0.04  | 1.79769e+ | 5.25E-01 | no |
| Gabbr2        | 0.00   | 0.03  | 1.79769e+ | 5.25E-01 | no |
| Gm11202       | 0.00   | 0.05  | 1.79769e+ | 5.25E-01 | no |
| Nek5          | 0.00   | 0.04  | 1.79769e+ | 5.25E-01 | no |
| Slc19a3       | 0.00   | 0.04  | 1.79769e+ | 5.25E-01 | no |
| a             | 0.00   | 0.16  | 1.79769e+ | 5.25E-01 | no |
| 2810405K02Ri  | 0.81   | 1.54  | 0.92      | 5.25E-01 | no |

|              |       |       |           |          |    |
|--------------|-------|-------|-----------|----------|----|
| Trim58       | 0.83  | 1.37  | 0.71      | 5.25E-01 | no |
| Adck5        | 6.84  | 9.39  | 0.46      | 5.25E-01 | no |
| Cnksr3       | 5.71  | 7.62  | 0.42      | 5.25E-01 | no |
| Zcchc8       | 24.88 | 20.28 | -0.29     | 5.25E-01 | no |
| Chchd10      | 77.35 | 62.25 | -0.31     | 5.25E-01 | no |
| Prpf4        | 13.29 | 10.62 | -0.32     | 5.25E-01 | no |
| Pomt1        | 14.01 | 10.83 | -0.37     | 5.25E-01 | no |
| Adam9        | 7.97  | 6.02  | -0.40     | 5.25E-01 | no |
| Rnf5         | 25.18 | 18.94 | -0.41     | 5.25E-01 | no |
| Cby1         | 17.09 | 12.48 | -0.45     | 5.25E-01 | no |
| A930005I04Ri | 0.78  | 0.45  | -0.79     | 5.25E-01 | no |
| Haus4        | 37.29 | 29.78 | -0.32     | 5.25E-01 | no |
| Rpf2         | 17.16 | 12.86 | -0.42     | 5.25E-01 | no |
| Stra13       | 27.40 | 19.83 | -0.47     | 5.26E-01 | no |
| Clec4a4      | 0.00  | 0.15  | 1.79769e+ | 5.27E-01 | no |
| Sema4c       | 0.22  | 0.42  | 0.93      | 5.27E-01 | no |
| Hes5         | 5.38  | 7.92  | 0.56      | 5.27E-01 | no |
| Ier2         | 17.79 | 23.02 | 0.37      | 5.27E-01 | no |
| Rif1         | 28.84 | 23.79 | -0.28     | 5.27E-01 | no |
| Rfk          | 28.54 | 22.72 | -0.33     | 5.27E-01 | no |
| Atxn7l2      | 8.59  | 6.45  | -0.41     | 5.27E-01 | no |
| Irgam        | 4.32  | 3.17  | -0.45     | 5.27E-01 | no |
| Card10       | 0.15  | 0.06  | -1.26     | 5.27E-01 | no |
| Eepd1        | 1.76  | 1.13  | -0.64     | 5.28E-01 | no |
| Pira11       | 0.00  | 0.03  | 1.79769e+ | 5.28E-01 | no |
| Kcnd3        | 0.00  | 0.06  | 1.79769e+ | 5.28E-01 | no |
| Fxyd2        | 0.00  | 0.22  | 1.79769e+ | 5.28E-01 | no |
| Kcnp1        | 0.00  | 0.03  | 1.79769e+ | 5.28E-01 | no |
| Elovl4       | 0.00  | 0.06  | 1.79769e+ | 5.28E-01 | no |
| Gpr82        | 0.00  | 0.04  | 1.79769e+ | 5.28E-01 | no |
| Klra3        | 0.00  | 0.06  | 1.79769e+ | 5.28E-01 | no |
| Gm10046      | 0.00  | 0.12  | 1.79769e+ | 5.28E-01 | no |
| 0610010O12Ri | 0.00  | 0.13  | 1.79769e+ | 5.28E-01 | no |
| 1700010B08Ri | 0.00  | 0.09  | 1.79769e+ | 5.28E-01 | no |
| 1700020N01Ri | 0.00  | 0.07  | 1.79769e+ | 5.28E-01 | no |
| 1700106J16Ri | 0.00  | 0.06  | 1.79769e+ | 5.28E-01 | no |
| 2410017I17Ri | 0.00  | 0.05  | 1.79769e+ | 5.28E-01 | no |
| 4833422F24Ri | 0.00  | 0.04  | 1.79769e+ | 5.28E-01 | no |
| 4930404H21Ri | 0.00  | 0.08  | 1.79769e+ | 5.28E-01 | no |
| 4930529M08R  | 0.00  | 0.05  | 1.79769e+ | 5.28E-01 | no |
| 4932438H23Ri | 0.00  | 0.03  | 1.79769e+ | 5.28E-01 | no |
| AF529169     | 0.00  | 0.02  | 1.79769e+ | 5.28E-01 | no |

|             |      |      |           |          |    |
|-------------|------|------|-----------|----------|----|
| Abca4       | 0.00 | 0.01 | 1.79769e+ | 5.28E-01 | no |
| Abcg5       | 0.00 | 0.03 | 1.79769e+ | 5.28E-01 | no |
| Abpa        | 0.00 | 0.20 | 1.79769e+ | 5.28E-01 | no |
| Acsbg2      | 0.00 | 0.03 | 1.79769e+ | 5.28E-01 | no |
| Adam30      | 0.00 | 0.03 | 1.79769e+ | 5.28E-01 | no |
| Adamts12    | 0.00 | 0.01 | 1.79769e+ | 5.28E-01 | no |
| Adamts15    | 0.00 | 0.01 | 1.79769e+ | 5.28E-01 | no |
| Adcy1       | 0.00 | 0.01 | 1.79769e+ | 5.28E-01 | no |
| Adh1        | 0.00 | 0.06 | 1.79769e+ | 5.28E-01 | no |
| Adprhl1     | 0.00 | 0.06 | 1.79769e+ | 5.28E-01 | no |
| Adra1b      | 0.00 | 0.02 | 1.79769e+ | 5.28E-01 | no |
| Agtr1a      | 0.00 | 0.03 | 1.79769e+ | 5.28E-01 | no |
| Ankrd56     | 0.00 | 0.02 | 1.79769e+ | 5.28E-01 | no |
| Ankrd60     | 0.00 | 0.13 | 1.79769e+ | 5.28E-01 | no |
| Aqp4        | 0.00 | 0.01 | 1.79769e+ | 5.28E-01 | no |
| Aqp7        | 0.00 | 0.03 | 1.79769e+ | 5.28E-01 | no |
| Aspa        | 0.00 | 0.05 | 1.79769e+ | 5.28E-01 | no |
| Atoh7       | 0.00 | 0.18 | 1.79769e+ | 5.28E-01 | no |
| B930007M17R | 0.00 | 0.03 | 1.79769e+ | 5.28E-01 | no |
| BC061194    | 0.00 | 0.05 | 1.79769e+ | 5.28E-01 | no |
| Banf2       | 0.00 | 0.20 | 1.79769e+ | 5.28E-01 | no |
| C1qtnf4     | 0.00 | 0.06 | 1.79769e+ | 5.28E-01 | no |
| C2cd4d      | 0.00 | 0.06 | 1.79769e+ | 5.28E-01 | no |
| Cbln1       | 0.00 | 0.03 | 1.79769e+ | 5.28E-01 | no |
| Ccdc60      | 0.00 | 0.03 | 1.79769e+ | 5.28E-01 | no |
| Ccdc65      | 0.00 | 0.04 | 1.79769e+ | 5.28E-01 | no |
| Cdcp2       | 0.00 | 0.03 | 1.79769e+ | 5.28E-01 | no |
| Cdh4        | 0.00 | 0.01 | 1.79769e+ | 5.28E-01 | no |
| Cdhr1       | 0.00 | 0.02 | 1.79769e+ | 5.28E-01 | no |
| Cldn1       | 0.00 | 0.02 | 1.79769e+ | 5.28E-01 | no |
| Clec2l      | 0.00 | 0.05 | 1.79769e+ | 5.28E-01 | no |
| Cntn2       | 0.00 | 0.01 | 1.79769e+ | 5.28E-01 | no |
| Col5a2      | 0.00 | 0.01 | 1.79769e+ | 5.28E-01 | no |
| Cyp21a1     | 0.00 | 0.04 | 1.79769e+ | 5.28E-01 | no |
| Cyp2d10     | 0.00 | 0.05 | 1.79769e+ | 5.28E-01 | no |
| Cyp2j8-ps   | 0.00 | 0.05 | 1.79769e+ | 5.28E-01 | no |
| Cyp4b1      | 0.00 | 0.04 | 1.79769e+ | 5.28E-01 | no |
| Dgki        | 0.00 | 0.02 | 1.79769e+ | 5.28E-01 | no |
| Dhh         | 0.00 | 0.03 | 1.79769e+ | 5.28E-01 | no |
| Dmrtc2      | 0.00 | 0.05 | 1.79769e+ | 5.28E-01 | no |
| Dner        | 0.00 | 0.02 | 1.79769e+ | 5.28E-01 | no |
| Dpep3       | 0.00 | 0.04 | 1.79769e+ | 5.28E-01 | no |

|              |      |      |           |          |    |
|--------------|------|------|-----------|----------|----|
| E030002O03Ri | 0.00 | 0.03 | 1.79769e+ | 5.28E-01 | no |
| Efhb         | 0.00 | 0.03 | 1.79769e+ | 5.28E-01 | no |
| Enox1        | 0.00 | 0.02 | 1.79769e+ | 5.28E-01 | no |
| Ern2         | 0.00 | 0.02 | 1.79769e+ | 5.28E-01 | no |
| F7           | 0.00 | 0.04 | 1.79769e+ | 5.28E-01 | no |
| Fabp4        | 0.00 | 0.12 | 1.79769e+ | 5.28E-01 | no |
| Fam13c       | 0.00 | 0.02 | 1.79769e+ | 5.28E-01 | no |
| Fam187b      | 0.00 | 0.05 | 1.79769e+ | 5.28E-01 | no |
| Fam20a       | 0.00 | 0.03 | 1.79769e+ | 5.28E-01 | no |
| Fam5b        | 0.00 | 0.02 | 1.79769e+ | 5.28E-01 | no |
| Fbxl16       | 0.00 | 0.02 | 1.79769e+ | 5.28E-01 | no |
| Fgf18        | 0.00 | 0.07 | 1.79769e+ | 5.28E-01 | no |
| Fitm1        | 0.00 | 0.08 | 1.79769e+ | 5.28E-01 | no |
| Flrt2        | 0.00 | 0.01 | 1.79769e+ | 5.28E-01 | no |
| Foxd1        | 0.00 | 0.03 | 1.79769e+ | 5.28E-01 | no |
| Fsd1         | 0.00 | 0.04 | 1.79769e+ | 5.28E-01 | no |
| Fzd1         | 0.00 | 0.02 | 1.79769e+ | 5.28E-01 | no |
| Gal3st2      | 0.00 | 0.03 | 1.79769e+ | 5.28E-01 | no |
| Galnt16      | 0.00 | 0.03 | 1.79769e+ | 5.28E-01 | no |
| Gbx1         | 0.00 | 0.05 | 1.79769e+ | 5.28E-01 | no |
| Gfra3        | 0.00 | 0.04 | 1.79769e+ | 5.28E-01 | no |
| Ggt6         | 0.00 | 0.04 | 1.79769e+ | 5.28E-01 | no |
| Glt1d1       | 0.00 | 0.05 | 1.79769e+ | 5.28E-01 | no |
| Gm1060       | 0.00 | 0.03 | 1.79769e+ | 5.28E-01 | no |
| Gm12597      | 0.00 | 0.14 | 1.79769e+ | 5.28E-01 | no |
| Gm13242      | 0.00 | 0.02 | 1.79769e+ | 5.28E-01 | no |
| Gm3867       | 0.00 | 0.09 | 1.79769e+ | 5.28E-01 | no |
| Gm5415       | 0.00 | 0.02 | 1.79769e+ | 5.28E-01 | no |
| Gpr37        | 0.00 | 0.02 | 1.79769e+ | 5.28E-01 | no |
| Gprc2a-rs5   | 0.00 | 0.02 | 1.79769e+ | 5.28E-01 | no |
| Grip2        | 0.00 | 0.01 | 1.79769e+ | 5.28E-01 | no |
| Grtp1        | 0.00 | 0.06 | 1.79769e+ | 5.28E-01 | no |
| Gsc2         | 0.00 | 0.11 | 1.79769e+ | 5.28E-01 | no |
| Has1         | 0.00 | 0.04 | 1.79769e+ | 5.28E-01 | no |
| Hc           | 0.00 | 0.01 | 1.79769e+ | 5.28E-01 | no |
| Hsd17b3      | 0.00 | 0.06 | 1.79769e+ | 5.28E-01 | no |
| Htr1a        | 0.00 | 0.02 | 1.79769e+ | 5.28E-01 | no |
| Ibsp         | 0.00 | 0.04 | 1.79769e+ | 5.28E-01 | no |
| Ifna14       | 0.00 | 0.14 | 1.79769e+ | 5.28E-01 | no |
| Il4          | 0.00 | 0.13 | 1.79769e+ | 5.28E-01 | no |
| Insl5        | 0.00 | 0.11 | 1.79769e+ | 5.28E-01 | no |
| Iqub         | 0.00 | 0.02 | 1.79769e+ | 5.28E-01 | no |

|          |      |      |           |          |    |
|----------|------|------|-----------|----------|----|
| Itgb8    | 0.00 | 0.02 | 1.79769e+ | 5.28E-01 | no |
| Kcnt1    | 0.00 | 0.02 | 1.79769e+ | 5.28E-01 | no |
| Klf15    | 0.00 | 0.03 | 1.79769e+ | 5.28E-01 | no |
| Klhdc8a  | 0.00 | 0.02 | 1.79769e+ | 5.28E-01 | no |
| Klhl31   | 0.00 | 0.01 | 1.79769e+ | 5.28E-01 | no |
| Kprp     | 0.00 | 0.03 | 1.79769e+ | 5.28E-01 | no |
| Krt82    | 0.00 | 0.04 | 1.79769e+ | 5.28E-01 | no |
| Lao1     | 0.00 | 0.04 | 1.79769e+ | 5.28E-01 | no |
| Lmod3    | 0.00 | 0.03 | 1.79769e+ | 5.28E-01 | no |
| Lrrc4b   | 0.00 | 0.03 | 1.79769e+ | 5.28E-01 | no |
| Lyzl4    | 0.00 | 0.08 | 1.79769e+ | 5.28E-01 | no |
| Magel2   | 0.00 | 0.02 | 1.79769e+ | 5.28E-01 | no |
| Matn1    | 0.00 | 0.04 | 1.79769e+ | 5.28E-01 | no |
| Mbd3l2   | 0.00 | 0.03 | 1.79769e+ | 5.28E-01 | no |
| Mc5r     | 0.00 | 0.07 | 1.79769e+ | 5.28E-01 | no |
| Mfap5    | 0.00 | 0.05 | 1.79769e+ | 5.28E-01 | no |
| Micalcl  | 0.00 | 0.03 | 1.79769e+ | 5.28E-01 | no |
| Mpdz     | 0.00 | 0.01 | 1.79769e+ | 5.28E-01 | no |
| Mpz      | 0.00 | 0.04 | 1.79769e+ | 5.28E-01 | no |
| Msx1     | 0.00 | 0.04 | 1.79769e+ | 5.28E-01 | no |
| Nat3     | 0.00 | 0.05 | 1.79769e+ | 5.28E-01 | no |
| Neurog3  | 0.00 | 0.05 | 1.79769e+ | 5.28E-01 | no |
| Nova2    | 0.00 | 0.01 | 1.79769e+ | 5.28E-01 | no |
| Nphs2    | 0.00 | 0.02 | 1.79769e+ | 5.28E-01 | no |
| Nptx1    | 0.00 | 0.01 | 1.79769e+ | 5.28E-01 | no |
| Olfm4    | 0.00 | 0.05 | 1.79769e+ | 5.28E-01 | no |
| P2ry4    | 0.00 | 0.02 | 1.79769e+ | 5.28E-01 | no |
| Pbld     | 0.00 | 0.04 | 1.79769e+ | 5.28E-01 | no |
| Pcdh12   | 0.00 | 0.01 | 1.79769e+ | 5.28E-01 | no |
| Pck1     | 0.00 | 0.03 | 1.79769e+ | 5.28E-01 | no |
| Pcsk5    | 0.00 | 0.01 | 1.79769e+ | 5.28E-01 | no |
| Pde3a    | 0.00 | 0.02 | 1.79769e+ | 5.28E-01 | no |
| Phldb2   | 0.00 | 0.01 | 1.79769e+ | 5.28E-01 | no |
| Pramef12 | 0.00 | 0.03 | 1.79769e+ | 5.28E-01 | no |
| Psg17    | 0.00 | 0.04 | 1.79769e+ | 5.28E-01 | no |
| Rab3c    | 0.00 | 0.01 | 1.79769e+ | 5.28E-01 | no |
| Rbp7     | 0.00 | 0.13 | 1.79769e+ | 5.28E-01 | no |
| Rgma     | 0.00 | 0.02 | 1.79769e+ | 5.28E-01 | no |
| Robo1    | 0.00 | 0.01 | 1.79769e+ | 5.28E-01 | no |
| Rp1l1    | 0.00 | 0.01 | 1.79769e+ | 5.28E-01 | no |
| Rprl1    | 0.00 | 0.09 | 1.79769e+ | 5.28E-01 | no |
| Rspo3    | 0.00 | 0.03 | 1.79769e+ | 5.28E-01 | no |

|               |      |      |            |          |    |
|---------------|------|------|------------|----------|----|
| Rtp3          | 0.00 | 0.03 | 1.79769e+  | 5.28E-01 | no |
| Scarna17      | 0.00 | 4.54 | 1.79769e+  | 5.28E-01 | no |
| Sec1          | 0.00 | 0.04 | 1.79769e+  | 5.28E-01 | no |
| Sema3a        | 0.00 | 0.01 | 1.79769e+  | 5.28E-01 | no |
| Slc1a6        | 0.00 | 0.04 | 1.79769e+  | 5.28E-01 | no |
| Slc45a2       | 0.00 | 0.02 | 1.79769e+  | 5.28E-01 | no |
| Slc6a20a      | 0.00 | 0.04 | 1.79769e+  | 5.28E-01 | no |
| Slc7a14       | 0.00 | 0.01 | 1.79769e+  | 5.28E-01 | no |
| Tacr2         | 0.00 | 0.03 | 1.79769e+  | 5.28E-01 | no |
| Tbata         | 0.00 | 0.07 | 1.79769e+  | 5.28E-01 | no |
| Tbx15         | 0.00 | 0.02 | 1.79769e+  | 5.28E-01 | no |
| Tmem132b      | 0.00 | 0.01 | 1.79769e+  | 5.28E-01 | no |
| Tmem88b       | 0.00 | 0.02 | 1.79769e+  | 5.28E-01 | no |
| Tnfaip6       | 0.00 | 0.05 | 1.79769e+  | 5.28E-01 | no |
| Tnr           | 0.00 | 0.01 | 1.79769e+  | 5.28E-01 | no |
| Trhde         | 0.00 | 0.01 | 1.79769e+  | 5.28E-01 | no |
| Tssk5         | 0.00 | 0.05 | 1.79769e+  | 5.28E-01 | no |
| Ttc36         | 0.00 | 0.10 | 1.79769e+  | 5.28E-01 | no |
| Ttc39d        | 0.00 | 0.04 | 1.79769e+  | 5.28E-01 | no |
| Ubqln3        | 0.00 | 0.03 | 1.79769e+  | 5.28E-01 | no |
| Unc45b        | 0.00 | 0.02 | 1.79769e+  | 5.28E-01 | no |
| Usp-ps        | 0.00 | 0.01 | 1.79769e+  | 5.28E-01 | no |
| Vmn2r26       | 0.00 | 0.03 | 1.79769e+  | 5.28E-01 | no |
| Vstm2l        | 0.00 | 0.06 | 1.79769e+  | 5.28E-01 | no |
| Ypel4         | 0.00 | 0.10 | 1.79769e+  | 5.28E-01 | no |
| Zfp366        | 0.00 | 0.03 | 1.79769e+  | 5.28E-01 | no |
| Nr1h5         | 0.09 | 0.00 | -1.79769e- | 5.28E-01 | no |
| 1700022I11Rik | 0.03 | 0.00 | -1.79769e- | 5.28E-01 | no |
| 1700027D21Ri  | 0.08 | 0.00 | -1.79769e- | 5.28E-01 | no |
| 3632451O06Ri  | 0.04 | 0.00 | -1.79769e- | 5.28E-01 | no |
| Cyp17a1       | 0.06 | 0.00 | -1.79769e- | 5.28E-01 | no |
| Epha7         | 0.02 | 0.00 | -1.79769e- | 5.28E-01 | no |
| Gpr156        | 0.02 | 0.00 | -1.79769e- | 5.28E-01 | no |
| Gtsf1         | 0.16 | 0.00 | -1.79769e- | 5.28E-01 | no |
| Hist1h2an     | 0.27 | 0.00 | -1.79769e- | 5.28E-01 | no |
| Il11          | 0.06 | 0.00 | -1.79769e- | 5.28E-01 | no |
| Lrfn3         | 0.04 | 0.00 | -1.79769e- | 5.28E-01 | no |
| Meig1         | 0.17 | 0.00 | -1.79769e- | 5.28E-01 | no |
| Myoz3         | 0.03 | 0.00 | -1.79769e- | 5.28E-01 | no |
| Prss27        | 0.09 | 0.00 | -1.79769e- | 5.28E-01 | no |
| Usp43         | 0.02 | 0.00 | -1.79769e- | 5.28E-01 | no |
| Vwa3a         | 0.02 | 0.00 | -1.79769e- | 5.28E-01 | no |

|              |      |      |           |          |    |
|--------------|------|------|-----------|----------|----|
| Zfp791       | 0.05 | 0.00 | -1.79769e | 5.28E-01 | no |
| 1700018A14Ri | 0.10 | 0.00 | -1.79769e | 5.28E-01 | no |
| Smok2a       | 0.05 | 0.00 | -1.79769e | 5.28E-01 | no |
| Timp3        | 0.02 | 0.00 | -1.79769e | 5.28E-01 | no |
| Trpc5        | 0.02 | 0.00 | -1.79769e | 5.28E-01 | no |
| Pdxk-ps      | 0.02 | 0.23 | 3.62      | 5.28E-01 | no |
| Tmem53       | 0.09 | 0.54 | 2.63      | 5.28E-01 | no |
| Pcdh11x      | 0.02 | 0.14 | 2.59      | 5.28E-01 | no |
| Syng3        | 0.03 | 0.20 | 2.54      | 5.28E-01 | no |
| Alpk2        | 0.01 | 0.07 | 2.18      | 5.28E-01 | no |
| Loxl2        | 0.02 | 0.10 | 2.16      | 5.28E-01 | no |
| Slc18a1      | 0.04 | 0.18 | 2.16      | 5.28E-01 | no |
| Rasl11a      | 0.14 | 0.46 | 1.71      | 5.28E-01 | no |
| Cd59b        | 0.27 | 0.85 | 1.64      | 5.28E-01 | no |
| Il1r2        | 0.15 | 0.45 | 1.56      | 5.28E-01 | no |
| Ddn          | 0.06 | 0.16 | 1.52      | 5.28E-01 | no |
| Gp5          | 0.11 | 0.29 | 1.42      | 5.28E-01 | no |
| Insrr        | 0.06 | 0.14 | 1.29      | 5.28E-01 | no |
| Hs3st1       | 0.21 | 0.51 | 1.26      | 5.28E-01 | no |
| 2900041M22R  | 0.28 | 0.64 | 1.18      | 5.28E-01 | no |
| Tmem221      | 0.28 | 0.61 | 1.12      | 5.28E-01 | no |
| 2210010C17Ri | 0.31 | 0.60 | 0.94      | 5.28E-01 | no |
| Slc27a6      | 0.31 | 0.59 | 0.94      | 5.28E-01 | no |
| Plscr4       | 0.28 | 0.54 | 0.93      | 5.28E-01 | no |
| Catsperg1    | 0.39 | 0.69 | 0.82      | 5.28E-01 | no |
| Amica1       | 0.53 | 0.93 | 0.81      | 5.28E-01 | no |
| Ahr          | 0.41 | 0.70 | 0.77      | 5.28E-01 | no |
| Clic3        | 1.82 | 3.06 | 0.75      | 5.28E-01 | no |
| Slc22a23     | 0.29 | 0.47 | 0.73      | 5.28E-01 | no |
| Atp11a       | 0.33 | 0.55 | 0.71      | 5.28E-01 | no |
| Fam164a      | 1.35 | 2.06 | 0.61      | 5.28E-01 | no |
| Cabp4        | 3.14 | 4.78 | 0.60      | 5.28E-01 | no |
| Klhdc1       | 2.38 | 3.60 | 0.60      | 5.28E-01 | no |
| Atg10        | 2.92 | 4.42 | 0.60      | 5.28E-01 | no |
| B3galt4      | 3.24 | 4.85 | 0.58      | 5.28E-01 | no |
| Ttc30b       | 1.93 | 2.89 | 0.58      | 5.28E-01 | no |
| Letm2        | 2.58 | 3.84 | 0.58      | 5.28E-01 | no |
| Lonrf1       | 1.45 | 2.15 | 0.57      | 5.28E-01 | no |
| Xlr4a        | 5.64 | 8.27 | 0.55      | 5.28E-01 | no |
| Clstn1       | 1.96 | 2.87 | 0.55      | 5.28E-01 | no |
| 4833442J19Ri | 5.42 | 7.91 | 0.55      | 5.28E-01 | no |
| 1700052K11Ri | 2.74 | 3.99 | 0.54      | 5.28E-01 | no |

|               |       |       |       |          |    |
|---------------|-------|-------|-------|----------|----|
| Rab32         | 4.44  | 6.40  | 0.53  | 5.28E-01 | no |
| A2ld1         | 7.45  | 10.70 | 0.52  | 5.28E-01 | no |
| Ikbip         | 3.32  | 4.71  | 0.50  | 5.28E-01 | no |
| Nudt14        | 11.36 | 16.07 | 0.50  | 5.28E-01 | no |
| 1110012D08Ri  | 4.24  | 5.98  | 0.50  | 5.28E-01 | no |
| Haghl         | 7.52  | 10.58 | 0.49  | 5.28E-01 | no |
| Acot13        | 15.05 | 21.01 | 0.48  | 5.28E-01 | no |
| Dnmbp         | 2.33  | 3.23  | 0.47  | 5.28E-01 | no |
| Art4          | 6.50  | 8.93  | 0.46  | 5.28E-01 | no |
| 4930581F22Ri  | 5.72  | 7.84  | 0.46  | 5.28E-01 | no |
| Relt          | 4.88  | 6.66  | 0.45  | 5.28E-01 | no |
| Slc39a11      | 5.15  | 7.01  | 0.45  | 5.28E-01 | no |
| Yipf2         | 7.61  | 10.30 | 0.44  | 5.28E-01 | no |
| Mtm1          | 5.37  | 7.26  | 0.43  | 5.28E-01 | no |
| Slc39a3       | 5.01  | 6.72  | 0.42  | 5.28E-01 | no |
| Zxdb          | 4.05  | 5.38  | 0.41  | 5.28E-01 | no |
| Dnajc16       | 5.42  | 7.18  | 0.41  | 5.28E-01 | no |
| Mospd1        | 15.72 | 20.67 | 0.39  | 5.28E-01 | no |
| Tm7sf3        | 8.16  | 10.66 | 0.39  | 5.28E-01 | no |
| Gabarapl1     | 14.57 | 18.99 | 0.38  | 5.28E-01 | no |
| Zfp932        | 15.40 | 20.00 | 0.38  | 5.28E-01 | no |
| Tspyl2        | 11.72 | 15.00 | 0.36  | 5.28E-01 | no |
| Msh5          | 10.34 | 13.17 | 0.35  | 5.28E-01 | no |
| 9030624J02Ril | 12.95 | 16.24 | 0.33  | 5.28E-01 | no |
| Prcp          | 17.17 | 21.53 | 0.33  | 5.28E-01 | no |
| Dusp6         | 21.42 | 26.71 | 0.32  | 5.28E-01 | no |
| Mafk          | 18.69 | 23.18 | 0.31  | 5.28E-01 | no |
| Nub1          | 17.91 | 22.08 | 0.30  | 5.28E-01 | no |
| 5430417L22Ril | 29.77 | 36.41 | 0.29  | 5.28E-01 | no |
| Phf21a        | 8.06  | 9.84  | 0.29  | 5.28E-01 | no |
| Xrcc6         | 66.11 | 80.28 | 0.28  | 5.28E-01 | no |
| Ankrd12       | 15.28 | 18.54 | 0.28  | 5.28E-01 | no |
| Ncor2         | 18.23 | 22.05 | 0.27  | 5.28E-01 | no |
| Nr3c1         | 32.03 | 38.74 | 0.27  | 5.28E-01 | no |
| Rnf14         | 26.72 | 31.71 | 0.25  | 5.28E-01 | no |
| Os9           | 22.48 | 26.60 | 0.24  | 5.28E-01 | no |
| Cnot1         | 60.17 | 52.24 | -0.20 | 5.28E-01 | no |
| Cdk12         | 24.09 | 20.68 | -0.22 | 5.28E-01 | no |
| Pwwp2a        | 24.37 | 20.42 | -0.26 | 5.28E-01 | no |
| Zfp871        | 34.81 | 28.84 | -0.27 | 5.28E-01 | no |
| Dock8         | 29.20 | 24.17 | -0.27 | 5.28E-01 | no |
| Pbrm1         | 41.07 | 33.99 | -0.27 | 5.28E-01 | no |



|              |        |        |       |          |    |
|--------------|--------|--------|-------|----------|----|
| Xpo6         | 37.48  | 31.00  | -0.27 | 5.28E-01 | no |
| Tnpo3        | 37.72  | 31.17  | -0.27 | 5.28E-01 | no |
| Hnrpd1       | 72.21  | 59.68  | -0.28 | 5.28E-01 | no |
| St6gal1      | 44.18  | 36.51  | -0.28 | 5.28E-01 | no |
| Prkar1a      | 69.48  | 57.41  | -0.28 | 5.28E-01 | no |
| Cggbp1       | 51.44  | 42.48  | -0.28 | 5.28E-01 | no |
| Tpm3         | 182.04 | 150.27 | -0.28 | 5.28E-01 | no |
| Stag1        | 31.55  | 26.04  | -0.28 | 5.28E-01 | no |
| 2810407C02Ri | 48.92  | 40.35  | -0.28 | 5.28E-01 | no |
| Stk38        | 44.15  | 36.41  | -0.28 | 5.28E-01 | no |
| Ttc7         | 27.57  | 22.72  | -0.28 | 5.28E-01 | no |
| Rcc2         | 104.14 | 85.81  | -0.28 | 5.28E-01 | no |
| Lrrc47       | 34.61  | 28.48  | -0.28 | 5.28E-01 | no |
| Usp5         | 36.40  | 29.94  | -0.28 | 5.28E-01 | no |
| Bdp1         | 12.91  | 10.60  | -0.28 | 5.28E-01 | no |
| Strap        | 49.54  | 40.64  | -0.29 | 5.28E-01 | no |
| Sf3a2        | 50.20  | 41.07  | -0.29 | 5.28E-01 | no |
| Usp10        | 28.88  | 23.59  | -0.29 | 5.28E-01 | no |
| Fli1         | 30.04  | 24.47  | -0.30 | 5.28E-01 | no |
| Pelp1        | 23.41  | 19.05  | -0.30 | 5.28E-01 | no |
| Dna2         | 20.93  | 17.00  | -0.30 | 5.28E-01 | no |
| Zfp322a      | 14.51  | 11.77  | -0.30 | 5.28E-01 | no |
| Eif4a3       | 52.77  | 42.76  | -0.30 | 5.28E-01 | no |
| Lmf2         | 25.74  | 20.82  | -0.31 | 5.28E-01 | no |
| Slc7a6       | 19.72  | 15.92  | -0.31 | 5.28E-01 | no |
| Psmc7        | 43.93  | 35.38  | -0.31 | 5.28E-01 | no |
| Dld          | 33.97  | 27.34  | -0.31 | 5.28E-01 | no |
| Ccdc41       | 23.11  | 18.58  | -0.31 | 5.28E-01 | no |
| Cspp1        | 15.26  | 12.27  | -0.31 | 5.28E-01 | no |
| Ccdc127      | 14.53  | 11.68  | -0.31 | 5.28E-01 | no |
| Cpsf3l       | 26.03  | 20.92  | -0.32 | 5.28E-01 | no |
| Ube2k        | 17.14  | 13.75  | -0.32 | 5.28E-01 | no |
| Rap1a        | 45.94  | 36.82  | -0.32 | 5.28E-01 | no |
| Ctsc         | 26.49  | 21.21  | -0.32 | 5.28E-01 | no |
| Map2k3       | 26.12  | 20.91  | -0.32 | 5.28E-01 | no |
| Cep135       | 11.17  | 8.94   | -0.32 | 5.28E-01 | no |
| Zfp326       | 21.38  | 17.09  | -0.32 | 5.28E-01 | no |
| Farsb        | 26.56  | 21.15  | -0.33 | 5.28E-01 | no |
| Psmc12       | 35.40  | 28.19  | -0.33 | 5.28E-01 | no |
| Rasa2        | 10.88  | 8.65   | -0.33 | 5.28E-01 | no |
| Mki67ip      | 29.47  | 23.42  | -0.33 | 5.28E-01 | no |
| Rnf7         | 50.93  | 40.42  | -0.33 | 5.28E-01 | no |

|              |       |       |       |          |    |
|--------------|-------|-------|-------|----------|----|
| Cul2         | 13.80 | 10.94 | -0.34 | 5.28E-01 | no |
| Pde5a        | 8.06  | 6.35  | -0.34 | 5.28E-01 | no |
| Apex1        | 37.19 | 29.19 | -0.35 | 5.28E-01 | no |
| Eif1ax       | 50.81 | 39.86 | -0.35 | 5.28E-01 | no |
| Sf3b5        | 53.49 | 41.86 | -0.35 | 5.28E-01 | no |
| Fbxo22       | 20.41 | 15.96 | -0.35 | 5.28E-01 | no |
| Asf1a        | 22.37 | 17.44 | -0.36 | 5.28E-01 | no |
| Rfx2         | 9.55  | 7.42  | -0.36 | 5.28E-01 | no |
| Zfp597       | 7.98  | 6.19  | -0.37 | 5.28E-01 | no |
| Pycr2        | 20.94 | 16.22 | -0.37 | 5.28E-01 | no |
| Timm17b      | 21.55 | 16.63 | -0.37 | 5.28E-01 | no |
| Phf10        | 22.00 | 16.96 | -0.37 | 5.28E-01 | no |
| Taf5         | 11.48 | 8.85  | -0.38 | 5.28E-01 | no |
| Cited2       | 18.74 | 14.43 | -0.38 | 5.28E-01 | no |
| BC003965     | 13.18 | 10.13 | -0.38 | 5.28E-01 | no |
| Gar1         | 24.60 | 18.86 | -0.38 | 5.28E-01 | no |
| Mrps18a      | 35.33 | 26.80 | -0.40 | 5.28E-01 | no |
| Pim2         | 13.94 | 10.49 | -0.41 | 5.28E-01 | no |
| Pttg1        | 27.09 | 20.33 | -0.41 | 5.28E-01 | no |
| Nlgn2        | 5.29  | 3.96  | -0.42 | 5.28E-01 | no |
| Clpb         | 5.75  | 4.30  | -0.42 | 5.28E-01 | no |
| Rnaseh2c     | 35.98 | 26.87 | -0.42 | 5.28E-01 | no |
| Nol12        | 11.49 | 8.57  | -0.42 | 5.28E-01 | no |
| Ift27        | 23.35 | 17.38 | -0.43 | 5.28E-01 | no |
| Pole3        | 29.73 | 21.86 | -0.44 | 5.28E-01 | no |
| Sertad3      | 12.13 | 8.65  | -0.49 | 5.28E-01 | no |
| Ap3m2        | 4.46  | 3.17  | -0.50 | 5.28E-01 | no |
| Dusp10       | 5.79  | 4.09  | -0.50 | 5.28E-01 | no |
| Gt(ROSA)26So | 23.55 | 16.55 | -0.51 | 5.28E-01 | no |
| Snhg3        | 32.48 | 22.66 | -0.52 | 5.28E-01 | no |
| Mrpl55       | 14.61 | 10.16 | -0.52 | 5.28E-01 | no |
| Rps4y2       | 4.03  | 2.52  | -0.68 | 5.28E-01 | no |
| Dennd2c      | 0.66  | 0.40  | -0.72 | 5.28E-01 | no |
| Ptpn14       | 0.26  | 0.15  | -0.77 | 5.28E-01 | no |
| Guca1b       | 1.04  | 0.60  | -0.80 | 5.28E-01 | no |
| Ankrd22      | 1.01  | 0.54  | -0.90 | 5.28E-01 | no |
| Lipc         | 0.44  | 0.19  | -1.17 | 5.28E-01 | no |
| Crispld2     | 0.20  | 0.09  | -1.21 | 5.28E-01 | no |
| Nkain1       | 0.26  | 0.11  | -1.24 | 5.28E-01 | no |
| Selp         | 0.21  | 0.08  | -1.37 | 5.28E-01 | no |
| Mlxipl       | 0.18  | 0.07  | -1.41 | 5.28E-01 | no |
| Arsi         | 0.32  | 0.10  | -1.66 | 5.28E-01 | no |

|              |       |       |       |          |    |
|--------------|-------|-------|-------|----------|----|
| Hist2h4      | 1.53  | 0.48  | -1.67 | 5.28E-01 | no |
| Ear2         | 0.72  | 0.23  | -1.68 | 5.28E-01 | no |
| Cd276        | 0.15  | 0.03  | -2.11 | 5.28E-01 | no |
| Gypa         | 0.21  | 0.04  | -2.34 | 5.28E-01 | no |
| Rtn4rl2      | 0.45  | 0.06  | -2.96 | 5.28E-01 | no |
| Cpne9        | 0.21  | 0.03  | -3.05 | 5.28E-01 | no |
| Mapre3       | 0.11  | 0.31  | 1.41  | 5.28E-01 | no |
| Dcun1d1      | 22.21 | 17.90 | -0.31 | 5.29E-01 | no |
| Xcr1         | 0.16  | 0.05  | -1.55 | 5.29E-01 | no |
| Apc2         | 0.05  | 0.11  | 0.97  | 5.29E-01 | no |
| Jkamp        | 8.06  | 11.60 | 0.52  | 5.29E-01 | no |
| Snap29       | 34.59 | 28.44 | -0.28 | 5.29E-01 | no |
| Ergic2       | 23.29 | 19.01 | -0.29 | 5.29E-01 | no |
| BC046331     | 12.76 | 10.06 | -0.34 | 5.29E-01 | no |
| Dhrs11       | 5.04  | 7.24  | 0.52  | 5.29E-01 | no |
| 1190002N15Ri | 7.55  | 5.69  | -0.41 | 5.29E-01 | no |
| Atn1         | 14.13 | 11.41 | -0.31 | 5.30E-01 | no |
| Mycbpap      | 0.16  | 0.32  | 1.00  | 5.30E-01 | no |
| Gadd45gip1   | 25.06 | 19.85 | -0.34 | 5.30E-01 | no |
| Slc25a17     | 30.94 | 24.46 | -0.34 | 5.30E-01 | no |
| Aldoc        | 1.14  | 1.85  | 0.70  | 5.30E-01 | no |
| Chi3l1       | 0.25  | 0.54  | 1.09  | 5.30E-01 | no |
| Krt7         | 0.26  | 0.07  | -1.90 | 5.31E-01 | no |
| Grinl1a      | 67.20 | 56.32 | -0.25 | 5.31E-01 | no |
| Rab3ip       | 9.28  | 6.96  | -0.42 | 5.31E-01 | no |
| Tgfb1        | 80.79 | 67.08 | -0.27 | 5.31E-01 | no |
| Fam125b      | 4.80  | 6.24  | 0.38  | 5.31E-01 | no |
| Amac1        | 0.39  | 0.05  | -2.95 | 5.31E-01 | no |
| Stx4a        | 21.29 | 27.09 | 0.35  | 5.32E-01 | no |
| Cct5         | 83.00 | 68.82 | -0.27 | 5.32E-01 | no |
| Ddx39        | 59.78 | 49.06 | -0.28 | 5.32E-01 | no |
| Cox10        | 10.75 | 8.25  | -0.38 | 5.32E-01 | no |
| Tle6         | 2.93  | 1.96  | -0.58 | 5.32E-01 | no |
| Lrrc20       | 5.06  | 3.61  | -0.49 | 5.32E-01 | no |
| Epn2         | 0.46  | 0.26  | -0.81 | 5.32E-01 | no |
| Pdia5        | 0.06  | 0.24  | 1.96  | 5.32E-01 | no |
| Nop16        | 18.44 | 14.18 | -0.38 | 5.32E-01 | no |
| Ube2m        | 56.96 | 46.95 | -0.28 | 5.33E-01 | no |
| Ism1         | 0.12  | 0.03  | -2.24 | 5.33E-01 | no |
| Rbm17        | 38.79 | 31.32 | -0.31 | 5.33E-01 | no |
| Rbak         | 6.28  | 8.20  | 0.39  | 5.33E-01 | no |
| E130112N10Ri | 5.18  | 7.56  | 0.55  | 5.34E-01 | no |

|              |       |       |            |          |    |
|--------------|-------|-------|------------|----------|----|
| Herc6        | 8.96  | 11.28 | 0.33       | 5.34E-01 | no |
| Ston2        | 0.02  | 0.06  | 1.77       | 5.34E-01 | no |
| Atg7         | 6.64  | 8.73  | 0.39       | 5.34E-01 | no |
| Tmem9        | 14.21 | 18.53 | 0.38       | 5.34E-01 | no |
| D430042O09R  | 5.51  | 6.94  | 0.33       | 5.34E-01 | no |
| Cpsf7        | 58.17 | 49.98 | -0.22      | 5.34E-01 | no |
| Orc3         | 17.08 | 14.33 | -0.25      | 5.34E-01 | no |
| 1110034A24Ri | 10.01 | 7.62  | -0.39      | 5.34E-01 | no |
| Tmco7        | 4.74  | 3.53  | -0.43      | 5.34E-01 | no |
| Al467606     | 22.49 | 17.78 | -0.34      | 5.35E-01 | no |
| Ube2l3       | 41.84 | 34.39 | -0.28      | 5.35E-01 | no |
| Plxnd1       | 11.44 | 14.06 | 0.30       | 5.36E-01 | no |
| Sbk1         | 59.72 | 72.06 | 0.27       | 5.36E-01 | no |
| Uba1         | 89.44 | 74.95 | -0.25      | 5.36E-01 | no |
| Rab39        | 0.40  | 0.20  | -0.97      | 5.36E-01 | no |
| Mgmt         | 2.68  | 4.26  | 0.66       | 5.36E-01 | no |
| 5-Sep        | 0.10  | 0.25  | 1.30       | 5.36E-01 | no |
| Pgap1        | 0.91  | 0.53  | -0.77      | 5.36E-01 | no |
| 1810022C23Ri | 1.31  | 2.14  | 0.71       | 5.36E-01 | no |
| Dtymk        | 82.21 | 68.33 | -0.27      | 5.36E-01 | no |
| Lsm7         | 55.25 | 42.04 | -0.39      | 5.36E-01 | no |
| Klra17       | 0.06  | 0.34  | 2.53       | 5.36E-01 | no |
| Tas1r1       | 0.06  | 0.21  | 1.87       | 5.36E-01 | no |
| Trappc10     | 19.67 | 23.81 | 0.28       | 5.36E-01 | no |
| Tcerg1       | 35.06 | 29.08 | -0.27      | 5.36E-01 | no |
| D5Ert579e    | 9.52  | 7.67  | -0.31      | 5.36E-01 | no |
| Pigf         | 9.24  | 6.28  | -0.56      | 5.36E-01 | no |
| Pitx2        | 0.00  | 0.06  | 1.79769e+  | 5.37E-01 | no |
| H2-Q2        | 0.16  | 0.50  | 1.62       | 5.37E-01 | no |
| 1700028J19Ri | 0.37  | 0.80  | 1.11       | 5.37E-01 | no |
| Elk4         | 42.50 | 51.43 | 0.27       | 5.37E-01 | no |
| Chaf1b       | 29.21 | 23.51 | -0.31      | 5.37E-01 | no |
| Psm6         | 42.03 | 33.57 | -0.32      | 5.37E-01 | no |
| Mrps22       | 19.59 | 14.67 | -0.42      | 5.37E-01 | no |
| Myh7b        | 0.32  | 0.19  | -0.74      | 5.37E-01 | no |
| Tmem14a      | 0.50  | 1.06  | 1.08       | 5.37E-01 | no |
| Atp9a        | 0.32  | 0.57  | 0.81       | 5.37E-01 | no |
| Gal3st1      | 0.09  | 0.00  | -1.79769e- | 5.38E-01 | no |
| Aff1         | 42.80 | 37.00 | -0.21      | 5.38E-01 | no |
| Ccpg1        | 12.75 | 15.84 | 0.31       | 5.38E-01 | no |
| Ide          | 38.81 | 32.25 | -0.27      | 5.38E-01 | no |
| Gm9855       | 28.28 | 23.06 | -0.29      | 5.38E-01 | no |

|              |        |       |            |          |    |
|--------------|--------|-------|------------|----------|----|
| Pdf          | 22.96  | 17.83 | -0.36      | 5.38E-01 | no |
| Ppp1r1b      | 0.33   | 0.12  | -1.54      | 5.38E-01 | no |
| Srm          | 39.31  | 31.54 | -0.32      | 5.38E-01 | no |
| Tctex1d2     | 4.20   | 6.52  | 0.64       | 5.38E-01 | no |
| Gatsl2       | 3.36   | 2.42  | -0.47      | 5.39E-01 | no |
| Dmxl2        | 0.04   | 0.08  | 1.20       | 5.39E-01 | no |
| 2500003M10R  | 76.64  | 63.76 | -0.27      | 5.39E-01 | no |
| Gm14403      | 0.17   | 0.34  | 0.97       | 5.39E-01 | no |
| Csda         | 60.82  | 51.33 | -0.24      | 5.40E-01 | no |
| BC021785     | 0.15   | 0.31  | 1.05       | 5.40E-01 | no |
| Smad7        | 7.99   | 10.10 | 0.34       | 5.40E-01 | no |
| Gdf9         | 0.45   | 0.20  | -1.19      | 5.40E-01 | no |
| Cops5        | 42.72  | 34.05 | -0.33      | 5.40E-01 | no |
| Rnf4         | 48.43  | 40.11 | -0.27      | 5.40E-01 | no |
| Fgr          | 0.84   | 1.32  | 0.65       | 5.40E-01 | no |
| Ankmy2       | 10.23  | 13.28 | 0.38       | 5.40E-01 | no |
| Pde9a        | 2.64   | 3.92  | 0.57       | 5.40E-01 | no |
| Creld1       | 4.09   | 5.77  | 0.50       | 5.40E-01 | no |
| Pax5         | 75.72  | 62.34 | -0.28      | 5.40E-01 | no |
| Ndufb8       | 49.04  | 38.00 | -0.37      | 5.40E-01 | no |
| Rnf150       | 0.17   | 0.10  | -0.85      | 5.40E-01 | no |
| Rya3         | 0.30   | 0.04  | -2.91      | 5.40E-01 | no |
| Rnaseh2b     | 27.53  | 21.56 | -0.35      | 5.40E-01 | no |
| 4931406P16Ri | 9.64   | 7.74  | -0.32      | 5.40E-01 | no |
| Kbtbd10      | 0.14   | 0.03  | -2.27      | 5.41E-01 | no |
| Ctnnd2       | 0.01   | 0.08  | 2.54       | 5.41E-01 | no |
| Ppm1j        | 0.43   | 0.77  | 0.86       | 5.41E-01 | no |
| Zfp62        | 33.01  | 27.52 | -0.26      | 5.41E-01 | no |
| Ppp1r1a      | 0.33   | 0.08  | -2.05      | 5.41E-01 | no |
| 2310004N24Ri | 21.27  | 28.01 | 0.40       | 5.41E-01 | no |
| Eml4         | 28.36  | 24.14 | -0.23      | 5.42E-01 | no |
| Cep70        | 9.49   | 7.11  | -0.42      | 5.42E-01 | no |
| Gm9104       | 0.15   | 0.00  | -1.79769e- | 5.42E-01 | no |
| Traf7        | 41.10  | 35.08 | -0.23      | 5.42E-01 | no |
| Xlr          | 0.83   | 1.52  | 0.88       | 5.43E-01 | no |
| Spg7         | 22.36  | 18.04 | -0.31      | 5.43E-01 | no |
| Smcr7l       | 15.15  | 12.33 | -0.30      | 5.43E-01 | no |
| Trmt5        | 11.93  | 8.80  | -0.44      | 5.43E-01 | no |
| Sod1         | 106.21 | 86.43 | -0.30      | 5.43E-01 | no |
| Adipoq       | 0.28   | 0.06  | -2.21      | 5.43E-01 | no |
| Zfyve26      | 11.36  | 13.71 | 0.27       | 5.44E-01 | no |
| Etv6         | 17.87  | 21.76 | 0.28       | 5.44E-01 | no |

|               |       |       |       |          |    |
|---------------|-------|-------|-------|----------|----|
| Morc3         | 25.22 | 20.78 | -0.28 | 5.44E-01 | no |
| 2810422O20Ri  | 7.23  | 5.03  | -0.52 | 5.44E-01 | no |
| Ints2         | 15.25 | 12.50 | -0.29 | 5.44E-01 | no |
| Slco5a1       | 1.73  | 1.21  | -0.51 | 5.44E-01 | no |
| Arcn1         | 63.16 | 52.62 | -0.26 | 5.44E-01 | no |
| Trafd1        | 20.37 | 24.78 | 0.28  | 5.44E-01 | no |
| B4galt6       | 0.15  | 0.06  | -1.31 | 5.44E-01 | no |
| Kdm4b         | 12.24 | 15.00 | 0.29  | 5.44E-01 | no |
| Slc4a8        | 0.28  | 0.18  | -0.66 | 5.44E-01 | no |
| Gm14326       | 0.47  | 0.75  | 0.68  | 5.45E-01 | no |
| Nudt22        | 5.90  | 8.51  | 0.53  | 5.45E-01 | no |
| Ermp1         | 16.16 | 13.21 | -0.29 | 5.45E-01 | no |
| Zc4h2         | 3.47  | 5.01  | 0.53  | 5.45E-01 | no |
| Hivep1        | 12.18 | 14.73 | 0.27  | 5.45E-01 | no |
| 2310037I24Rik | 59.30 | 49.13 | -0.27 | 5.45E-01 | no |
| Fam20c        | 0.17  | 0.02  | -2.90 | 5.45E-01 | no |
| Atg4c         | 3.55  | 4.95  | 0.48  | 5.46E-01 | no |
| 1110037F02Ri  | 25.21 | 20.97 | -0.27 | 5.46E-01 | no |
| Med21         | 25.59 | 18.86 | -0.44 | 5.46E-01 | no |
| 1110032F04Ri  | 0.65  | 0.37  | -0.82 | 5.46E-01 | no |
| Oas1c         | 5.07  | 6.96  | 0.46  | 5.46E-01 | no |
| Slc4a1        | 0.16  | 0.07  | -1.18 | 5.46E-01 | no |
| Podnl1        | 0.06  | 0.21  | 1.93  | 5.46E-01 | no |
| Jph3          | 0.19  | 0.34  | 0.85  | 5.46E-01 | no |
| Iqgap1        | 58.28 | 48.41 | -0.27 | 5.46E-01 | no |
| Fam136a       | 31.00 | 24.78 | -0.32 | 5.46E-01 | no |
| Ndufaf4       | 8.88  | 6.79  | -0.39 | 5.46E-01 | no |
| Chi3l3        | 2.97  | 4.42  | 0.57  | 5.46E-01 | no |
| Gle1          | 22.67 | 18.49 | -0.29 | 5.47E-01 | no |
| Clec12a       | 2.28  | 3.44  | 0.59  | 5.47E-01 | no |
| Aars          | 25.65 | 21.29 | -0.27 | 5.47E-01 | no |
| Rwdd2a        | 1.02  | 0.54  | -0.91 | 5.47E-01 | no |
| Npepps        | 22.89 | 27.76 | 0.28  | 5.47E-01 | no |
| Fam100b       | 23.03 | 17.94 | -0.36 | 5.47E-01 | no |
| S1pr2         | 1.46  | 2.20  | 0.59  | 5.47E-01 | no |
| Foxp1         | 50.48 | 44.37 | -0.19 | 5.48E-01 | no |
| Txlna         | 38.04 | 32.52 | -0.23 | 5.48E-01 | no |
| Chrna2        | 0.16  | 0.06  | -1.38 | 5.48E-01 | no |
| Ccdc86        | 10.93 | 8.54  | -0.36 | 5.49E-01 | no |
| Mdh2          | 70.21 | 57.88 | -0.28 | 5.49E-01 | no |
| Trim21        | 13.92 | 17.31 | 0.31  | 5.49E-01 | no |
| Egr2          | 0.34  | 0.17  | -0.99 | 5.49E-01 | no |

|              |        |        |            |          |    |
|--------------|--------|--------|------------|----------|----|
| Insig1       | 13.14  | 16.69  | 0.34       | 5.49E-01 | no |
| Tspan17      | 0.66   | 0.34   | -0.96      | 5.49E-01 | no |
| Rpl6         | 113.02 | 93.97  | -0.27      | 5.49E-01 | no |
| Usp20        | 3.43   | 4.61   | 0.43       | 5.51E-01 | no |
| Gtf2f1       | 34.37  | 27.96  | -0.30      | 5.51E-01 | no |
| Rps15        | 319.19 | 266.19 | -0.26      | 5.51E-01 | no |
| Rps26        | 278.03 | 230.62 | -0.27      | 5.51E-01 | no |
| 1700092M07R  | 2.28   | 1.08   | -1.07      | 5.51E-01 | no |
| C1qbp        | 59.50  | 48.58  | -0.29      | 5.52E-01 | no |
| Wdr48        | 24.60  | 20.27  | -0.28      | 5.52E-01 | no |
| 1810048J11Ri | 1.93   | 2.74   | 0.50       | 5.52E-01 | no |
| Fancc        | 9.09   | 7.05   | -0.37      | 5.52E-01 | no |
| Mrps27       | 16.55  | 12.82  | -0.37      | 5.52E-01 | no |
| Scrn3        | 5.20   | 3.76   | -0.47      | 5.52E-01 | no |
| Cyb5b        | 38.71  | 32.22  | -0.26      | 5.53E-01 | no |
| Rap1gap2     | 0.36   | 0.22   | -0.74      | 5.53E-01 | no |
| 9230114K14Ri | 2.12   | 1.38   | -0.62      | 5.53E-01 | no |
| Fbxo18       | 13.93  | 17.22  | 0.31       | 5.53E-01 | no |
| Stt3b        | 42.64  | 35.56  | -0.26      | 5.54E-01 | no |
| Fam49b       | 24.93  | 20.46  | -0.29      | 5.54E-01 | no |
| 1110032A03Ri | 3.27   | 4.76   | 0.54       | 5.54E-01 | no |
| Hnrnpm       | 121.30 | 105.80 | -0.20      | 5.54E-01 | no |
| Srsf15       | 28.85  | 23.95  | -0.27      | 5.54E-01 | no |
| Mrpl21       | 14.95  | 10.87  | -0.46      | 5.54E-01 | no |
| Klra8        | 0.07   | 0.00   | -1.79769e- | 5.54E-01 | no |
| C920009B18Ri | 7.88   | 10.04  | 0.35       | 5.54E-01 | no |
| Il12a        | 24.35  | 30.77  | 0.34       | 5.54E-01 | no |
| Dido1        | 39.57  | 34.91  | -0.18      | 5.54E-01 | no |
| Scn4b        | 22.07  | 17.75  | -0.31      | 5.54E-01 | no |
| Cep192       | 24.18  | 20.19  | -0.26      | 5.55E-01 | no |
| Hhat         | 1.01   | 1.55   | 0.62       | 5.55E-01 | no |
| Ppifos       | 4.49   | 6.35   | 0.50       | 5.55E-01 | no |
| Cd247        | 33.06  | 28.02  | -0.24      | 5.55E-01 | no |
| Krr1         | 14.27  | 11.60  | -0.30      | 5.55E-01 | no |
| Nme1         | 48.04  | 38.90  | -0.30      | 5.55E-01 | no |
| Mamstr       | 0.15   | 0.03   | -2.18      | 5.56E-01 | no |
| 2610528E23Ri | 12.44  | 9.07   | -0.46      | 5.56E-01 | no |
| Pih1d2       | 0.96   | 0.53   | -0.86      | 5.56E-01 | no |
| BY080835     | 0.77   | 0.39   | -1.00      | 5.57E-01 | no |
| 1500011B03Ri | 7.93   | 10.77  | 0.44       | 5.57E-01 | no |
| Btk          | 43.45  | 52.28  | 0.27       | 5.58E-01 | no |
| Ccdc77       | 12.07  | 9.26   | -0.38      | 5.59E-01 | no |

|              |       |       |            |          |    |
|--------------|-------|-------|------------|----------|----|
| 2810055G20Ri | 0.14  | 0.32  | 1.16       | 5.59E-01 | no |
| Snrnp40      | 38.41 | 31.23 | -0.30      | 5.59E-01 | no |
| Abcd3        | 11.23 | 8.75  | -0.36      | 5.60E-01 | no |
| Coil         | 11.51 | 8.91  | -0.37      | 5.60E-01 | no |
| Rfxank       | 9.72  | 12.13 | 0.32       | 5.60E-01 | no |
| Il11ra1      | 1.18  | 1.98  | 0.75       | 5.61E-01 | no |
| Sap18        | 15.75 | 12.62 | -0.32      | 5.61E-01 | no |
| Snrpf        | 44.75 | 34.77 | -0.36      | 5.61E-01 | no |
| Phb2         | 68.72 | 56.94 | -0.27      | 5.62E-01 | no |
| Rnf169       | 21.09 | 25.37 | 0.27       | 5.62E-01 | no |
| Mphosph8     | 18.50 | 14.90 | -0.31      | 5.62E-01 | no |
| Vps45        | 9.75  | 7.44  | -0.39      | 5.62E-01 | no |
| Icam1        | 8.10  | 10.54 | 0.38       | 5.62E-01 | no |
| Rhov         | 0.17  | 0.40  | 1.20       | 5.62E-01 | no |
| Snrpa1       | 32.08 | 25.43 | -0.34      | 5.63E-01 | no |
| 4930539E08Ri | 1.13  | 0.75  | -0.59      | 5.63E-01 | no |
| Cdkl1        | 0.30  | 0.02  | -3.92      | 5.63E-01 | no |
| Gm10789      | 0.50  | 0.30  | -0.72      | 5.63E-01 | no |
| Bpil1        | 0.29  | 0.04  | -2.84      | 5.63E-01 | no |
| 2810004N23Ri | 19.39 | 14.94 | -0.38      | 5.63E-01 | no |
| Cyp4f15      | 0.00  | 0.04  | 1.79769e+  | 5.63E-01 | no |
| Cacnb3       | 0.00  | 0.05  | 1.79769e+  | 5.63E-01 | no |
| Gpr68        | 0.00  | 0.05  | 1.79769e+  | 5.63E-01 | no |
| Atp1a4       | 0.00  | 0.03  | 1.79769e+  | 5.63E-01 | no |
| Clec4n       | 0.00  | 0.10  | 1.79769e+  | 5.63E-01 | no |
| Coro6        | 0.08  | 0.00  | -1.79769e- | 5.63E-01 | no |
| Klrc3        | 0.16  | 0.00  | -1.79769e- | 5.63E-01 | no |
| Ugt3a1       | 0.05  | 0.00  | -1.79769e- | 5.63E-01 | no |
| 1700011L22Ri | 0.07  | 0.00  | -1.79769e- | 5.63E-01 | no |
| 1700024P16Ri | 0.02  | 0.00  | -1.79769e- | 5.63E-01 | no |
| 1700093K21Ri | 0.07  | 0.00  | -1.79769e- | 5.63E-01 | no |
| 2610034M16R  | 0.02  | 0.00  | -1.79769e- | 5.63E-01 | no |
| 4930434E21Ri | 0.03  | 0.00  | -1.79769e- | 5.63E-01 | no |
| 4932425I24Ri | 0.02  | 0.00  | -1.79769e- | 5.63E-01 | no |
| A330021E22Ri | 0.02  | 0.00  | -1.79769e- | 5.63E-01 | no |
| A730037C10Ri | 0.03  | 0.00  | -1.79769e- | 5.63E-01 | no |
| A930003O13R  | 0.04  | 0.00  | -1.79769e- | 5.63E-01 | no |
| Al646023     | 0.01  | 0.00  | -1.79769e- | 5.63E-01 | no |
| Aard         | 0.05  | 0.00  | -1.79769e- | 5.63E-01 | no |
| Acpt         | 0.05  | 0.00  | -1.79769e- | 5.63E-01 | no |
| Acsm4        | 0.03  | 0.00  | -1.79769e- | 5.63E-01 | no |
| Adamts5      | 0.01  | 0.00  | -1.79769e- | 5.63E-01 | no |



|            |      |      |           |          |    |
|------------|------|------|-----------|----------|----|
| Agxt2      | 0.04 | 0.00 | -1.79769e | 5.63E-01 | no |
| Aifm3      | 0.03 | 0.00 | -1.79769e | 5.63E-01 | no |
| Alox8      | 0.02 | 0.00 | -1.79769e | 5.63E-01 | no |
| Apoh       | 0.06 | 0.00 | -1.79769e | 5.63E-01 | no |
| Atp8b1     | 0.01 | 0.00 | -1.79769e | 5.63E-01 | no |
| BC030476   | 0.03 | 0.00 | -1.79769e | 5.63E-01 | no |
| BC049635   | 0.04 | 0.00 | -1.79769e | 5.63E-01 | no |
| Bgn        | 0.03 | 0.00 | -1.79769e | 5.63E-01 | no |
| Bpil3      | 0.04 | 0.00 | -1.79769e | 5.63E-01 | no |
| C1ql4      | 0.10 | 0.00 | -1.79769e | 5.63E-01 | no |
| Cabp5      | 0.04 | 0.00 | -1.79769e | 5.63E-01 | no |
| Cartpt     | 0.08 | 0.00 | -1.79769e | 5.63E-01 | no |
| Ccdc110    | 0.03 | 0.00 | -1.79769e | 5.63E-01 | no |
| Ccdc85a    | 0.02 | 0.00 | -1.79769e | 5.63E-01 | no |
| Ccl17      | 0.14 | 0.00 | -1.79769e | 5.63E-01 | no |
| Ceacam18   | 0.04 | 0.00 | -1.79769e | 5.63E-01 | no |
| Cel        | 0.03 | 0.00 | -1.79769e | 5.63E-01 | no |
| Cntn4      | 0.01 | 0.00 | -1.79769e | 5.63E-01 | no |
| Cpne7      | 0.03 | 0.00 | -1.79769e | 5.63E-01 | no |
| Cryba4     | 0.09 | 0.00 | -1.79769e | 5.63E-01 | no |
| Crym       | 0.06 | 0.00 | -1.79769e | 5.63E-01 | no |
| Cyp2a12    | 0.04 | 0.00 | -1.79769e | 5.63E-01 | no |
| D3Bwg0562e | 0.01 | 0.00 | -1.79769e | 5.63E-01 | no |
| Ddah1      | 0.02 | 0.00 | -1.79769e | 5.63E-01 | no |
| Dmrtb1     | 0.04 | 0.00 | -1.79769e | 5.63E-01 | no |
| F13b       | 0.03 | 0.00 | -1.79769e | 5.63E-01 | no |
| F2         | 0.03 | 0.00 | -1.79769e | 5.63E-01 | no |
| Fam110c    | 0.03 | 0.00 | -1.79769e | 5.63E-01 | no |
| Fam181b    | 0.04 | 0.00 | -1.79769e | 5.63E-01 | no |
| Fam81a     | 0.02 | 0.00 | -1.79769e | 5.63E-01 | no |
| Fbln7      | 0.02 | 0.00 | -1.79769e | 5.63E-01 | no |
| Fgf2       | 0.10 | 0.00 | -1.79769e | 5.63E-01 | no |
| Fmo1       | 0.03 | 0.00 | -1.79769e | 5.63E-01 | no |
| Foxd4      | 0.03 | 0.00 | -1.79769e | 5.63E-01 | no |
| Gdf5       | 0.03 | 0.00 | -1.79769e | 5.63E-01 | no |
| Glp2r      | 0.01 | 0.00 | -1.79769e | 5.63E-01 | no |
| Gm10565    | 0.04 | 0.00 | -1.79769e | 5.63E-01 | no |
| Gm11213    | 0.15 | 0.00 | -1.79769e | 5.63E-01 | no |
| Gm766      | 0.05 | 0.00 | -1.79769e | 5.63E-01 | no |
| Gpr83      | 0.03 | 0.00 | -1.79769e | 5.63E-01 | no |
| Grem1      | 0.04 | 0.00 | -1.79769e | 5.63E-01 | no |
| Gsta1      | 0.08 | 0.00 | -1.79769e | 5.63E-01 | no |

|          |      |      |           |          |    |
|----------|------|------|-----------|----------|----|
| Gzmb     | 0.05 | 0.00 | -1.79769e | 5.63E-01 | no |
| H2-T3    | 0.03 | 0.00 | -1.79769e | 5.63E-01 | no |
| Hapln4   | 0.02 | 0.00 | -1.79769e | 5.63E-01 | no |
| Hoxc4    | 0.03 | 0.00 | -1.79769e | 5.63E-01 | no |
| Hrg      | 0.04 | 0.00 | -1.79769e | 5.63E-01 | no |
| Hrh1     | 0.02 | 0.00 | -1.79769e | 5.63E-01 | no |
| Htr1f    | 0.03 | 0.00 | -1.79769e | 5.63E-01 | no |
| Htra1    | 0.03 | 0.00 | -1.79769e | 5.63E-01 | no |
| Hunk     | 0.01 | 0.00 | -1.79769e | 5.63E-01 | no |
| Igfbp6   | 0.05 | 0.00 | -1.79769e | 5.63E-01 | no |
| Inhbb    | 0.02 | 0.00 | -1.79769e | 5.63E-01 | no |
| Itih2    | 0.02 | 0.00 | -1.79769e | 5.63E-01 | no |
| Kcnj1    | 0.02 | 0.00 | -1.79769e | 5.63E-01 | no |
| Kcnq3    | 0.02 | 0.00 | -1.79769e | 5.63E-01 | no |
| Kif27    | 0.02 | 0.00 | -1.79769e | 5.63E-01 | no |
| Klhl34   | 0.04 | 0.00 | -1.79769e | 5.63E-01 | no |
| Klk1b22  | 0.09 | 0.00 | -1.79769e | 5.63E-01 | no |
| Lect1    | 0.05 | 0.00 | -1.79769e | 5.63E-01 | no |
| Lrrtm1   | 0.03 | 0.00 | -1.79769e | 5.63E-01 | no |
| Mmp12    | 0.02 | 0.00 | -1.79769e | 5.63E-01 | no |
| Mpp3     | 0.02 | 0.00 | -1.79769e | 5.63E-01 | no |
| Ndst4    | 0.02 | 0.00 | -1.79769e | 5.63E-01 | no |
| Necab1   | 0.01 | 0.00 | -1.79769e | 5.63E-01 | no |
| Nmur1    | 0.06 | 0.00 | -1.79769e | 5.63E-01 | no |
| Nobox    | 0.04 | 0.00 | -1.79769e | 5.63E-01 | no |
| Nrbp2    | 0.03 | 0.00 | -1.79769e | 5.63E-01 | no |
| Nrg1     | 0.03 | 0.00 | -1.79769e | 5.63E-01 | no |
| Oit3     | 0.03 | 0.00 | -1.79769e | 5.63E-01 | no |
| Olfml1   | 0.03 | 0.00 | -1.79769e | 5.63E-01 | no |
| Pde6a    | 0.02 | 0.00 | -1.79769e | 5.63E-01 | no |
| Plac1    | 0.07 | 0.00 | -1.79769e | 5.63E-01 | no |
| Pm20d1   | 0.02 | 0.00 | -1.79769e | 5.63E-01 | no |
| Prdm14   | 0.03 | 0.00 | -1.79769e | 5.63E-01 | no |
| Prdm8    | 0.02 | 0.00 | -1.79769e | 5.63E-01 | no |
| Prss45   | 0.06 | 0.00 | -1.79769e | 5.63E-01 | no |
| Pzca     | 0.08 | 0.00 | -1.79769e | 5.63E-01 | no |
| Rdh18-ps | 0.02 | 0.00 | -1.79769e | 5.63E-01 | no |
| Retn     | 0.06 | 0.00 | -1.79769e | 5.63E-01 | no |
| Rgag1    | 0.02 | 0.00 | -1.79769e | 5.63E-01 | no |
| Rgl3     | 0.03 | 0.00 | -1.79769e | 5.63E-01 | no |
| Rgs22    | 0.02 | 0.00 | -1.79769e | 5.63E-01 | no |
| Satl1    | 0.03 | 0.00 | -1.79769e | 5.63E-01 | no |

|              |      |      |           |          |    |
|--------------|------|------|-----------|----------|----|
| Sfrp4        | 0.04 | 0.00 | -1.79769e | 5.63E-01 | no |
| Sim1         | 0.01 | 0.00 | -1.79769e | 5.63E-01 | no |
| Slc13a3      | 0.02 | 0.00 | -1.79769e | 5.63E-01 | no |
| Slc13a4      | 0.02 | 0.00 | -1.79769e | 5.63E-01 | no |
| Slc25a41     | 0.06 | 0.00 | -1.79769e | 5.63E-01 | no |
| Slc26a3      | 0.03 | 0.00 | -1.79769e | 5.63E-01 | no |
| Slc28a1      | 0.02 | 0.00 | -1.79769e | 5.63E-01 | no |
| Slc44a5      | 0.02 | 0.00 | -1.79769e | 5.63E-01 | no |
| Slc47a1      | 0.03 | 0.00 | -1.79769e | 5.63E-01 | no |
| Spink2       | 0.12 | 0.00 | -1.79769e | 5.63E-01 | no |
| T            | 0.03 | 0.00 | -1.79769e | 5.63E-01 | no |
| Tff2         | 0.13 | 0.00 | -1.79769e | 5.63E-01 | no |
| Tktl1        | 0.03 | 0.00 | -1.79769e | 5.63E-01 | no |
| Tmem132d     | 0.02 | 0.00 | -1.79769e | 5.63E-01 | no |
| Trap1a       | 0.06 | 0.00 | -1.79769e | 5.63E-01 | no |
| Tril         | 0.01 | 0.00 | -1.79769e | 5.63E-01 | no |
| Trim50       | 0.05 | 0.00 | -1.79769e | 5.63E-01 | no |
| Tro          | 0.02 | 0.00 | -1.79769e | 5.63E-01 | no |
| Vat1l        | 0.02 | 0.00 | -1.79769e | 5.63E-01 | no |
| Vmn1r233     | 0.07 | 0.00 | -1.79769e | 5.63E-01 | no |
| Vmn1r42      | 0.07 | 0.00 | -1.79769e | 5.63E-01 | no |
| Vwa5b1       | 0.02 | 0.00 | -1.79769e | 5.63E-01 | no |
| Vwc2         | 0.02 | 0.00 | -1.79769e | 5.63E-01 | no |
| Wee2         | 0.02 | 0.00 | -1.79769e | 5.63E-01 | no |
| Wfdc10       | 0.16 | 0.00 | -1.79769e | 5.63E-01 | no |
| Zfp532       | 0.01 | 0.00 | -1.79769e | 5.63E-01 | no |
| 1700003E16Ri | 0.04 | 0.00 | -1.79769e | 5.63E-01 | no |
| 1700029H14Ri | 0.05 | 0.00 | -1.79769e | 5.63E-01 | no |
| 1700128F08Ri | 0.09 | 0.00 | -1.79769e | 5.63E-01 | no |
| 1810041L15Ri | 0.02 | 0.00 | -1.79769e | 5.63E-01 | no |
| 2200002J24Ri | 0.13 | 0.00 | -1.79769e | 5.63E-01 | no |
| 4833403I15Ri | 0.03 | 0.00 | -1.79769e | 5.63E-01 | no |
| 4930412F15Ri | 0.05 | 0.00 | -1.79769e | 5.63E-01 | no |
| 4930563D23Ri | 0.03 | 0.00 | -1.79769e | 5.63E-01 | no |
| 4930583K01Ri | 0.11 | 0.00 | -1.79769e | 5.63E-01 | no |
| A930017M01F  | 0.03 | 0.00 | -1.79769e | 5.63E-01 | no |
| A930038C07Ri | 0.02 | 0.00 | -1.79769e | 5.63E-01 | no |
| Abcb11       | 0.02 | 0.00 | -1.79769e | 5.63E-01 | no |
| Abcc6        | 0.02 | 0.00 | -1.79769e | 5.63E-01 | no |
| Acnat1       | 0.02 | 0.00 | -1.79769e | 5.63E-01 | no |
| Actl9        | 0.06 | 0.00 | -1.79769e | 5.63E-01 | no |
| Ambp         | 0.06 | 0.00 | -1.79769e | 5.63E-01 | no |

|              |      |      |           |          |    |
|--------------|------|------|-----------|----------|----|
| Ankar        | 0.02 | 0.00 | -1.79769e | 5.63E-01 | no |
| Ankrd34b     | 0.02 | 0.00 | -1.79769e | 5.63E-01 | no |
| Ano4         | 0.02 | 0.00 | -1.79769e | 5.63E-01 | no |
| Ano5         | 0.02 | 0.00 | -1.79769e | 5.63E-01 | no |
| Aox1         | 0.02 | 0.00 | -1.79769e | 5.63E-01 | no |
| Aox4         | 0.02 | 0.00 | -1.79769e | 5.63E-01 | no |
| Aplnr        | 0.03 | 0.00 | -1.79769e | 5.63E-01 | no |
| Apol11b      | 0.04 | 0.00 | -1.79769e | 5.63E-01 | no |
| Artn         | 0.04 | 0.00 | -1.79769e | 5.63E-01 | no |
| Asb17        | 0.09 | 0.00 | -1.79769e | 5.63E-01 | no |
| Asb5         | 0.07 | 0.00 | -1.79769e | 5.63E-01 | no |
| Ascl3        | 0.11 | 0.00 | -1.79769e | 5.63E-01 | no |
| Ascl4        | 0.07 | 0.00 | -1.79769e | 5.63E-01 | no |
| Astn1        | 0.01 | 0.00 | -1.79769e | 5.63E-01 | no |
| Atp6v0d2     | 0.05 | 0.00 | -1.79769e | 5.63E-01 | no |
| Avpr1a       | 0.04 | 0.00 | -1.79769e | 5.63E-01 | no |
| BC055111     | 0.04 | 0.00 | -1.79769e | 5.63E-01 | no |
| Bpi          | 0.05 | 0.00 | -1.79769e | 5.63E-01 | no |
| C130060K24Ri | 0.04 | 0.00 | -1.79769e | 5.63E-01 | no |
| Ccr6         | 0.06 | 0.00 | -1.79769e | 5.63E-01 | no |
| Cdhr5        | 0.03 | 0.00 | -1.79769e | 5.63E-01 | no |
| Cdk5r2       | 0.03 | 0.00 | -1.79769e | 5.63E-01 | no |
| Cftr         | 0.02 | 0.00 | -1.79769e | 5.63E-01 | no |
| Chl1         | 0.01 | 0.00 | -1.79769e | 5.63E-01 | no |
| Cldn2        | 0.03 | 0.00 | -1.79769e | 5.63E-01 | no |
| Clec2e       | 0.05 | 0.00 | -1.79769e | 5.63E-01 | no |
| Cngb3        | 0.02 | 0.00 | -1.79769e | 5.63E-01 | no |
| Cobl         | 0.01 | 0.00 | -1.79769e | 5.63E-01 | no |
| Col16a1      | 0.01 | 0.00 | -1.79769e | 5.63E-01 | no |
| Col6a2       | 0.02 | 0.00 | -1.79769e | 5.63E-01 | no |
| Creb3l1      | 0.03 | 0.00 | -1.79769e | 5.63E-01 | no |
| Crybb1       | 0.09 | 0.00 | -1.79769e | 5.63E-01 | no |
| Csmd1        | 0.01 | 0.00 | -1.79769e | 5.63E-01 | no |
| Dkk4         | 0.06 | 0.00 | -1.79769e | 5.63E-01 | no |
| Dpysl5       | 0.02 | 0.00 | -1.79769e | 5.63E-01 | no |
| Dthd1        | 0.04 | 0.00 | -1.79769e | 5.63E-01 | no |
| Duox1        | 0.02 | 0.00 | -1.79769e | 5.63E-01 | no |
| Ecscr        | 0.07 | 0.00 | -1.79769e | 5.63E-01 | no |
| Entpd3       | 0.03 | 0.00 | -1.79769e | 5.63E-01 | no |
| Ephx3        | 0.04 | 0.00 | -1.79769e | 5.63E-01 | no |
| Esrrg        | 0.02 | 0.00 | -1.79769e | 5.63E-01 | no |
| Evx1         | 0.03 | 0.00 | -1.79769e | 5.63E-01 | no |

|             |      |      |           |          |    |
|-------------|------|------|-----------|----------|----|
| F730043M19R | 0.06 | 0.00 | -1.79769e | 5.63E-01 | no |
| Fam124b     | 0.03 | 0.00 | -1.79769e | 5.63E-01 | no |
| Fam135b     | 0.02 | 0.00 | -1.79769e | 5.63E-01 | no |
| Fam57b      | 0.05 | 0.00 | -1.79769e | 5.63E-01 | no |
| Fam71e2     | 0.03 | 0.00 | -1.79769e | 5.63E-01 | no |
| Fcrls       | 0.04 | 0.00 | -1.79769e | 5.63E-01 | no |
| Fgf17       | 0.04 | 0.00 | -1.79769e | 5.63E-01 | no |
| Foxa3       | 0.04 | 0.00 | -1.79769e | 5.63E-01 | no |
| Foxc2       | 0.03 | 0.00 | -1.79769e | 5.63E-01 | no |
| Fut2        | 0.03 | 0.00 | -1.79769e | 5.63E-01 | no |
| Gcgr        | 0.05 | 0.00 | -1.79769e | 5.63E-01 | no |
| Gja8        | 0.06 | 0.00 | -1.79769e | 5.63E-01 | no |
| Gjb5        | 0.05 | 0.00 | -1.79769e | 5.63E-01 | no |
| Glb1l2      | 0.03 | 0.00 | -1.79769e | 5.63E-01 | no |
| Gm11961     | 0.11 | 0.00 | -1.79769e | 5.63E-01 | no |
| Gm13939     | 0.08 | 0.00 | -1.79769e | 5.63E-01 | no |
| Gm4566      | 0.17 | 0.00 | -1.79769e | 5.63E-01 | no |
| Gm5544      | 0.11 | 0.00 | -1.79769e | 5.63E-01 | no |
| Gm6880      | 0.11 | 0.00 | -1.79769e | 5.63E-01 | no |
| Gm8579      | 0.12 | 0.00 | -1.79769e | 5.63E-01 | no |
| Gm9999      | 0.16 | 0.00 | -1.79769e | 5.63E-01 | no |
| Gnai1       | 0.03 | 0.00 | -1.79769e | 5.63E-01 | no |
| Gpc3        | 0.04 | 0.00 | -1.79769e | 5.63E-01 | no |
| Gpr50       | 0.05 | 0.00 | -1.79769e | 5.63E-01 | no |
| Gramd2      | 0.06 | 0.00 | -1.79769e | 5.63E-01 | no |
| H1foo       | 0.06 | 0.00 | -1.79769e | 5.63E-01 | no |
| H2-M10.6    | 0.06 | 0.00 | -1.79769e | 5.63E-01 | no |
| Hey2        | 0.04 | 0.00 | -1.79769e | 5.63E-01 | no |
| Hfe2        | 0.04 | 0.00 | -1.79769e | 5.63E-01 | no |
| Hhla1       | 0.04 | 0.00 | -1.79769e | 5.63E-01 | no |
| Hoxb1       | 0.04 | 0.00 | -1.79769e | 5.63E-01 | no |
| Hoxc6       | 0.05 | 0.00 | -1.79769e | 5.63E-01 | no |
| Hrc         | 0.03 | 0.00 | -1.79769e | 5.63E-01 | no |
| Hspb1       | 0.08 | 0.00 | -1.79769e | 5.63E-01 | no |
| Igfbp3      | 0.04 | 0.00 | -1.79769e | 5.63E-01 | no |
| Kcnk16      | 0.10 | 0.00 | -1.79769e | 5.63E-01 | no |
| Kcns3       | 0.03 | 0.00 | -1.79769e | 5.63E-01 | no |
| Kif6        | 0.02 | 0.00 | -1.79769e | 5.63E-01 | no |
| Kiss1       | 0.16 | 0.00 | -1.79769e | 5.63E-01 | no |
| Klk5        | 0.06 | 0.00 | -1.79769e | 5.63E-01 | no |
| Lad1        | 0.02 | 0.00 | -1.79769e | 5.63E-01 | no |
| Ldhc        | 0.08 | 0.00 | -1.79769e | 5.63E-01 | no |

|          |      |      |           |          |    |
|----------|------|------|-----------|----------|----|
| Lonrf2   | 0.02 | 0.00 | -1.79769e | 5.63E-01 | no |
| Lphn3    | 0.02 | 0.00 | -1.79769e | 5.63E-01 | no |
| Lrrc38   | 0.04 | 0.00 | -1.79769e | 5.63E-01 | no |
| Lrrc4c   | 0.03 | 0.00 | -1.79769e | 5.63E-01 | no |
| Lrrc52   | 0.08 | 0.00 | -1.79769e | 5.63E-01 | no |
| Mcf2     | 0.03 | 0.00 | -1.79769e | 5.63E-01 | no |
| Mmp16    | 0.02 | 0.00 | -1.79769e | 5.63E-01 | no |
| Mmp3     | 0.05 | 0.00 | -1.79769e | 5.63E-01 | no |
| Mog      | 0.05 | 0.00 | -1.79769e | 5.63E-01 | no |
| Mogat1   | 0.08 | 0.00 | -1.79769e | 5.63E-01 | no |
| Mpp2     | 0.02 | 0.00 | -1.79769e | 5.63E-01 | no |
| Msgn1    | 0.13 | 0.00 | -1.79769e | 5.63E-01 | no |
| Naa11    | 0.03 | 0.00 | -1.79769e | 5.63E-01 | no |
| Neil2    | 0.04 | 0.00 | -1.79769e | 5.63E-01 | no |
| Nek10    | 0.03 | 0.00 | -1.79769e | 5.63E-01 | no |
| Nipal4   | 0.03 | 0.00 | -1.79769e | 5.63E-01 | no |
| Ntf5     | 0.04 | 0.00 | -1.79769e | 5.63E-01 | no |
| Ntrk2    | 0.01 | 0.00 | -1.79769e | 5.63E-01 | no |
| Nxph2    | 0.05 | 0.00 | -1.79769e | 5.63E-01 | no |
| Osbpl10  | 0.04 | 0.00 | -1.79769e | 5.63E-01 | no |
| Otog     | 0.01 | 0.00 | -1.79769e | 5.63E-01 | no |
| Parm1    | 0.04 | 0.00 | -1.79769e | 5.63E-01 | no |
| Peg3     | 0.01 | 0.00 | -1.79769e | 5.63E-01 | no |
| Penk     | 0.06 | 0.00 | -1.79769e | 5.63E-01 | no |
| Pf4      | 0.15 | 0.00 | -1.79769e | 5.63E-01 | no |
| Pla2g4d  | 0.03 | 0.00 | -1.79769e | 5.63E-01 | no |
| Plscr5   | 0.08 | 0.00 | -1.79769e | 5.63E-01 | no |
| Plxna4   | 0.01 | 0.00 | -1.79769e | 5.63E-01 | no |
| Ppef1    | 0.04 | 0.00 | -1.79769e | 5.63E-01 | no |
| Prb1     | 0.04 | 0.00 | -1.79769e | 5.63E-01 | no |
| Prkg2    | 0.02 | 0.00 | -1.79769e | 5.63E-01 | no |
| Prss52   | 0.09 | 0.00 | -1.79769e | 5.63E-01 | no |
| Ptch2    | 0.02 | 0.00 | -1.79769e | 5.63E-01 | no |
| Ptgds    | 0.10 | 0.00 | -1.79769e | 5.63E-01 | no |
| Rab15    | 0.03 | 0.00 | -1.79769e | 5.63E-01 | no |
| Rab40b   | 0.05 | 0.00 | -1.79769e | 5.63E-01 | no |
| Rasgef1c | 0.03 | 0.00 | -1.79769e | 5.63E-01 | no |
| Rbp3     | 0.02 | 0.00 | -1.79769e | 5.63E-01 | no |
| Rgr      | 0.06 | 0.00 | -1.79769e | 5.63E-01 | no |
| Rln1     | 0.11 | 0.00 | -1.79769e | 5.63E-01 | no |
| Rnu12    | 0.83 | 0.00 | -1.79769e | 5.63E-01 | no |
| Rsph4a   | 0.03 | 0.00 | -1.79769e | 5.63E-01 | no |

|           |      |      |           |          |    |
|-----------|------|------|-----------|----------|----|
| S100a16   | 0.08 | 0.00 | -1.79769e | 5.63E-01 | no |
| S100a3    | 0.12 | 0.00 | -1.79769e | 5.63E-01 | no |
| Scel      | 0.03 | 0.00 | -1.79769e | 5.63E-01 | no |
| Sdpr      | 0.03 | 0.00 | -1.79769e | 5.63E-01 | no |
| Shisa3    | 0.04 | 0.00 | -1.79769e | 5.63E-01 | no |
| Shisa4    | 0.07 | 0.00 | -1.79769e | 5.63E-01 | no |
| Six2      | 0.04 | 0.00 | -1.79769e | 5.63E-01 | no |
| Slc17a6   | 0.03 | 0.00 | -1.79769e | 5.63E-01 | no |
| Slc28a3   | 0.02 | 0.00 | -1.79769e | 5.63E-01 | no |
| Slc30a3   | 0.04 | 0.00 | -1.79769e | 5.63E-01 | no |
| Slc34a3   | 0.05 | 0.00 | -1.79769e | 5.63E-01 | no |
| Slc4a9    | 0.03 | 0.00 | -1.79769e | 5.63E-01 | no |
| Slc5a8    | 0.02 | 0.00 | -1.79769e | 5.63E-01 | no |
| Slc8a2    | 0.02 | 0.00 | -1.79769e | 5.63E-01 | no |
| Slit3     | 0.02 | 0.00 | -1.79769e | 5.63E-01 | no |
| Snhg11    | 0.02 | 0.00 | -1.79769e | 5.63E-01 | no |
| Sobp      | 0.02 | 0.00 | -1.79769e | 5.63E-01 | no |
| Sohlh1    | 0.06 | 0.00 | -1.79769e | 5.63E-01 | no |
| Spata4    | 0.10 | 0.00 | -1.79769e | 5.63E-01 | no |
| Spep      | 0.06 | 0.00 | -1.79769e | 5.63E-01 | no |
| Sstr3     | 0.02 | 0.00 | -1.79769e | 5.63E-01 | no |
| Steap1    | 0.08 | 0.00 | -1.79769e | 5.63E-01 | no |
| Stmn4     | 0.06 | 0.00 | -1.79769e | 5.63E-01 | no |
| Sult4a1   | 0.03 | 0.00 | -1.79769e | 5.63E-01 | no |
| Sycp1-ps1 | 0.04 | 0.00 | -1.79769e | 5.63E-01 | no |
| Syt12     | 0.02 | 0.00 | -1.79769e | 5.63E-01 | no |
| Syt2      | 0.03 | 0.00 | -1.79769e | 5.63E-01 | no |
| Tcf23     | 0.02 | 0.00 | -1.79769e | 5.63E-01 | no |
| Tekt4     | 0.05 | 0.00 | -1.79769e | 5.63E-01 | no |
| Tff3      | 0.19 | 0.00 | -1.79769e | 5.63E-01 | no |
| Tgm3      | 0.02 | 0.00 | -1.79769e | 5.63E-01 | no |
| Tmem151a  | 0.02 | 0.00 | -1.79769e | 5.63E-01 | no |
| Tnfsf15   | 0.02 | 0.00 | -1.79769e | 5.63E-01 | no |
| Tnfsf18   | 0.06 | 0.00 | -1.79769e | 5.63E-01 | no |
| Trim38    | 0.06 | 0.00 | -1.79769e | 5.63E-01 | no |
| Trim75    | 0.04 | 0.00 | -1.79769e | 5.63E-01 | no |
| Trpc4     | 0.03 | 0.00 | -1.79769e | 5.63E-01 | no |
| Trpv1     | 0.03 | 0.00 | -1.79769e | 5.63E-01 | no |
| Tsga13    | 0.09 | 0.00 | -1.79769e | 5.63E-01 | no |
| Ttll10    | 0.03 | 0.00 | -1.79769e | 5.63E-01 | no |
| Tuba3b    | 0.05 | 0.00 | -1.79769e | 5.63E-01 | no |
| Ube2ql1   | 0.03 | 0.00 | -1.79769e | 5.63E-01 | no |

|               |      |      |           |          |    |
|---------------|------|------|-----------|----------|----|
| Uncx          | 0.03 | 0.00 | -1.79769e | 5.63E-01 | no |
| Vax2          | 0.06 | 0.00 | -1.79769e | 5.63E-01 | no |
| Vgll3         | 0.03 | 0.00 | -1.79769e | 5.63E-01 | no |
| Vmn2r15       | 0.05 | 0.00 | -1.79769e | 5.63E-01 | no |
| Vmn2r65       | 0.05 | 0.00 | -1.79769e | 5.63E-01 | no |
| Wdr93         | 0.04 | 0.00 | -1.79769e | 5.63E-01 | no |
| Zfp389        | 0.10 | 0.00 | -1.79769e | 5.63E-01 | no |
| Zg16          | 0.14 | 0.00 | -1.79769e | 5.63E-01 | no |
| Zyg11a        | 0.04 | 0.00 | -1.79769e | 5.63E-01 | no |
| 1700001C19Ri  | 0.09 | 1.79 | 4.26      | 5.63E-01 | no |
| Trem3         | 0.08 | 0.54 | 2.77      | 5.63E-01 | no |
| Fpr2          | 0.08 | 0.48 | 2.66      | 5.63E-01 | no |
| Chrna10       | 0.03 | 0.17 | 2.37      | 5.63E-01 | no |
| Pgpep1l       | 0.12 | 0.44 | 1.86      | 5.63E-01 | no |
| Tmprss7       | 0.07 | 0.23 | 1.79      | 5.63E-01 | no |
| Tmem146       | 0.06 | 0.22 | 1.75      | 5.63E-01 | no |
| Kcnj11        | 0.05 | 0.17 | 1.65      | 5.63E-01 | no |
| 4930431A04Ri  | 0.25 | 0.80 | 1.65      | 5.63E-01 | no |
| Fam110b       | 0.08 | 0.24 | 1.58      | 5.63E-01 | no |
| Klhl4         | 0.08 | 0.23 | 1.58      | 5.63E-01 | no |
| Erv3          | 0.07 | 0.21 | 1.58      | 5.63E-01 | no |
| 4930544O15Ri  | 0.25 | 0.69 | 1.48      | 5.63E-01 | no |
| Peli3         | 0.11 | 0.29 | 1.33      | 5.63E-01 | no |
| Epm2a         | 0.24 | 0.58 | 1.28      | 5.63E-01 | no |
| Myo15         | 0.03 | 0.07 | 1.28      | 5.63E-01 | no |
| Gpr160        | 0.32 | 0.74 | 1.22      | 5.63E-01 | no |
| 9530009M10R   | 0.11 | 0.26 | 1.20      | 5.63E-01 | no |
| Gm5741        | 0.97 | 2.23 | 1.20      | 5.63E-01 | no |
| Tnfrsf11a     | 0.06 | 0.14 | 1.16      | 5.63E-01 | no |
| 4930486L24Ri  | 0.26 | 0.59 | 1.15      | 5.63E-01 | no |
| Pomc          | 0.38 | 0.79 | 1.06      | 5.63E-01 | no |
| Zcchc18       | 2.35 | 4.75 | 1.02      | 5.63E-01 | no |
| Vash1         | 0.08 | 0.15 | 0.96      | 5.63E-01 | no |
| I830077J02Rik | 0.67 | 1.26 | 0.90      | 5.63E-01 | no |
| Pde7b         | 0.21 | 0.38 | 0.88      | 5.63E-01 | no |
| D630032N06R   | 0.99 | 1.76 | 0.83      | 5.63E-01 | no |
| Gpr35         | 0.21 | 0.36 | 0.80      | 5.63E-01 | no |
| Rnf17         | 0.17 | 0.30 | 0.78      | 5.63E-01 | no |
| Hbb-b1,Hbb-b  | 1.63 | 2.77 | 0.76      | 5.63E-01 | no |
| Fcamr         | 0.63 | 1.07 | 0.76      | 5.63E-01 | no |
| Dse           | 0.29 | 0.49 | 0.75      | 5.63E-01 | no |
| AA415398      | 0.60 | 1.01 | 0.75      | 5.63E-01 | no |



|               |       |       |      |          |    |
|---------------|-------|-------|------|----------|----|
| Nradd         | 1.14  | 1.89  | 0.72 | 5.63E-01 | no |
| Ccl6          | 1.06  | 1.73  | 0.70 | 5.63E-01 | no |
| Mtap7d3       | 0.56  | 0.91  | 0.70 | 5.63E-01 | no |
| Fam135a       | 0.32  | 0.52  | 0.70 | 5.63E-01 | no |
| 2010015L04Ril | 0.53  | 0.84  | 0.67 | 5.63E-01 | no |
| Nid2          | 0.35  | 0.55  | 0.66 | 5.63E-01 | no |
| Prrg2         | 1.27  | 2.01  | 0.66 | 5.63E-01 | no |
| Tmem144       | 1.07  | 1.65  | 0.63 | 5.63E-01 | no |
| Ccdc64        | 1.08  | 1.67  | 0.63 | 5.63E-01 | no |
| Spred3        | 0.73  | 1.12  | 0.62 | 5.63E-01 | no |
| Ttpa          | 0.99  | 1.51  | 0.61 | 5.63E-01 | no |
| Tnfrsf22      | 1.32  | 2.01  | 0.60 | 5.63E-01 | no |
| Al429214      | 1.36  | 2.05  | 0.60 | 5.63E-01 | no |
| 1700020D05Ri  | 2.41  | 3.63  | 0.59 | 5.63E-01 | no |
| Cdk20         | 1.56  | 2.35  | 0.59 | 5.63E-01 | no |
| 9230116N13Ri  | 1.43  | 2.15  | 0.59 | 5.63E-01 | no |
| Zfp449        | 1.01  | 1.51  | 0.58 | 5.63E-01 | no |
| Kctd12b       | 1.20  | 1.79  | 0.58 | 5.63E-01 | no |
| Myl6b         | 3.41  | 5.08  | 0.58 | 5.63E-01 | no |
| Bbs7          | 1.16  | 1.72  | 0.57 | 5.63E-01 | no |
| Fcer1g        | 4.95  | 7.37  | 0.57 | 5.63E-01 | no |
| Ppp1r3f       | 1.00  | 1.47  | 0.56 | 5.63E-01 | no |
| Efha2         | 1.82  | 2.66  | 0.55 | 5.63E-01 | no |
| 8-Mar         | 1.21  | 1.74  | 0.53 | 5.63E-01 | no |
| Lrp12         | 1.67  | 2.40  | 0.52 | 5.63E-01 | no |
| Dhrs7         | 4.91  | 7.01  | 0.51 | 5.63E-01 | no |
| Fbxw17        | 3.55  | 5.03  | 0.50 | 5.63E-01 | no |
| Hemk1         | 3.50  | 4.92  | 0.49 | 5.63E-01 | no |
| 1110058L19Ril | 11.01 | 15.46 | 0.49 | 5.63E-01 | no |
| Zfp316        | 1.14  | 1.59  | 0.48 | 5.63E-01 | no |
| Gm5134        | 3.48  | 4.87  | 0.48 | 5.63E-01 | no |
| B230312A22Ri  | 2.85  | 3.97  | 0.48 | 5.63E-01 | no |
| Zmat1         | 3.02  | 4.18  | 0.47 | 5.63E-01 | no |
| Ccbl1         | 4.14  | 5.72  | 0.47 | 5.63E-01 | no |
| Optn          | 3.33  | 4.59  | 0.47 | 5.63E-01 | no |
| Aph1b         | 2.44  | 3.36  | 0.46 | 5.63E-01 | no |
| Creb3l2       | 3.07  | 4.21  | 0.46 | 5.63E-01 | no |
| Sfmbt2        | 1.30  | 1.78  | 0.45 | 5.63E-01 | no |
| Llgl2         | 3.06  | 4.19  | 0.45 | 5.63E-01 | no |
| 1700094D03Ri  | 3.69  | 5.02  | 0.45 | 5.63E-01 | no |
| Coq10a        | 4.54  | 6.16  | 0.44 | 5.63E-01 | no |
| Cstb          | 21.44 | 28.91 | 0.43 | 5.63E-01 | no |

|             |       |       |      |          |    |
|-------------|-------|-------|------|----------|----|
| Gtdc1       | 6.12  | 8.21  | 0.42 | 5.63E-01 | no |
| Lysmd4      | 3.64  | 4.87  | 0.42 | 5.63E-01 | no |
| Tnip2       | 6.96  | 9.27  | 0.41 | 5.63E-01 | no |
| Casp1       | 11.00 | 14.59 | 0.41 | 5.63E-01 | no |
| Metap1d     | 13.19 | 17.32 | 0.39 | 5.63E-01 | no |
| Dnahc1      | 1.25  | 1.64  | 0.39 | 5.63E-01 | no |
| Lysmd1      | 7.66  | 10.05 | 0.39 | 5.63E-01 | no |
| Tspyl4      | 4.67  | 6.11  | 0.39 | 5.63E-01 | no |
| Soat1       | 4.69  | 6.13  | 0.39 | 5.63E-01 | no |
| Irgm2       | 5.62  | 7.34  | 0.38 | 5.63E-01 | no |
| Crat        | 4.22  | 5.50  | 0.38 | 5.63E-01 | no |
| Rab40c      | 8.38  | 10.87 | 0.37 | 5.63E-01 | no |
| Pgm1        | 9.18  | 11.89 | 0.37 | 5.63E-01 | no |
| Dlg3        | 5.48  | 7.08  | 0.37 | 5.63E-01 | no |
| Slc12a3     | 6.18  | 7.97  | 0.37 | 5.63E-01 | no |
| Sh3bp1      | 11.06 | 14.20 | 0.36 | 5.63E-01 | no |
| Il10rb      | 12.32 | 15.81 | 0.36 | 5.63E-01 | no |
| Smpd1       | 11.29 | 14.40 | 0.35 | 5.63E-01 | no |
| Ddb2        | 12.38 | 15.77 | 0.35 | 5.63E-01 | no |
| Pramef8     | 6.91  | 8.80  | 0.35 | 5.63E-01 | no |
| D230025D16R | 10.76 | 13.69 | 0.35 | 5.63E-01 | no |
| Atp7a       | 3.89  | 4.92  | 0.34 | 5.63E-01 | no |
| BC031353    | 6.15  | 7.78  | 0.34 | 5.63E-01 | no |
| Ankrd16     | 11.31 | 14.27 | 0.34 | 5.63E-01 | no |
| Tigd2       | 11.90 | 14.98 | 0.33 | 5.63E-01 | no |
| Invs        | 5.30  | 6.66  | 0.33 | 5.63E-01 | no |
| Atp6v1e1    | 26.54 | 33.30 | 0.33 | 5.63E-01 | no |
| Chm         | 7.62  | 9.55  | 0.33 | 5.63E-01 | no |
| Dag1        | 6.94  | 8.68  | 0.32 | 5.63E-01 | no |
| Qsox1       | 11.18 | 13.95 | 0.32 | 5.63E-01 | no |
| Lrpap1      | 11.03 | 13.76 | 0.32 | 5.63E-01 | no |
| Use1        | 37.76 | 47.08 | 0.32 | 5.63E-01 | no |
| Fam73a      | 7.15  | 8.92  | 0.32 | 5.63E-01 | no |
| Ncf2        | 17.93 | 22.07 | 0.30 | 5.63E-01 | no |
| Arhgef3     | 14.28 | 17.57 | 0.30 | 5.63E-01 | no |
| Mgrn1       | 13.78 | 16.94 | 0.30 | 5.63E-01 | no |
| Stx6        | 19.08 | 23.38 | 0.29 | 5.63E-01 | no |
| Zfp187      | 14.64 | 17.90 | 0.29 | 5.63E-01 | no |
| Zfp319      | 11.05 | 13.50 | 0.29 | 5.63E-01 | no |
| Fam123b     | 7.56  | 9.22  | 0.29 | 5.63E-01 | no |
| Wdfy4       | 67.52 | 81.77 | 0.28 | 5.63E-01 | no |
| Josd1       | 16.99 | 20.57 | 0.28 | 5.63E-01 | no |

|          |        |        |       |          |    |
|----------|--------|--------|-------|----------|----|
| Ugcg     | 22.35  | 27.04  | 0.27  | 5.63E-01 | no |
| Mnt      | 13.41  | 16.19  | 0.27  | 5.63E-01 | no |
| Sqstm1   | 40.40  | 48.60  | 0.27  | 5.63E-01 | no |
| Nfrkb    | 16.49  | 19.81  | 0.26  | 5.63E-01 | no |
| Ap1b1    | 24.18  | 29.01  | 0.26  | 5.63E-01 | no |
| Rab3gap2 | 12.65  | 15.16  | 0.26  | 5.63E-01 | no |
| Zfpm1    | 44.58  | 53.29  | 0.26  | 5.63E-01 | no |
| Setd7    | 17.29  | 20.65  | 0.26  | 5.63E-01 | no |
| Vps13d   | 11.23  | 13.39  | 0.25  | 5.63E-01 | no |
| Clint1   | 46.33  | 55.10  | 0.25  | 5.63E-01 | no |
| Stat5b   | 22.30  | 26.11  | 0.23  | 5.63E-01 | no |
| Pag1     | 20.98  | 24.23  | 0.21  | 5.63E-01 | no |
| Inpp5d   | 72.47  | 81.68  | 0.17  | 5.63E-01 | no |
| Cd97     | 61.31  | 54.43  | -0.17 | 5.63E-01 | no |
| Ube2i    | 150.94 | 132.30 | -0.19 | 5.63E-01 | no |
| Cdc25b   | 100.26 | 87.83  | -0.19 | 5.63E-01 | no |
| Smek1    | 44.03  | 38.40  | -0.20 | 5.63E-01 | no |
| Clk1     | 81.95  | 71.41  | -0.20 | 5.63E-01 | no |
| Rnf38    | 43.61  | 37.82  | -0.21 | 5.63E-01 | no |
| Dyrk1a   | 36.98  | 31.96  | -0.21 | 5.63E-01 | no |
| Ptk2b    | 38.89  | 33.58  | -0.21 | 5.63E-01 | no |
| Atp2a2   | 52.83  | 45.60  | -0.21 | 5.63E-01 | no |
| Senp2    | 23.61  | 20.11  | -0.23 | 5.63E-01 | no |
| Lpgat1   | 28.45  | 24.12  | -0.24 | 5.63E-01 | no |
| Pphln1   | 24.56  | 20.80  | -0.24 | 5.63E-01 | no |
| Ipo9     | 29.34  | 24.76  | -0.24 | 5.63E-01 | no |
| Arl6ip1  | 116.36 | 98.09  | -0.25 | 5.63E-01 | no |
| Dhx9     | 70.78  | 59.64  | -0.25 | 5.63E-01 | no |
| Sympk    | 36.40  | 30.65  | -0.25 | 5.63E-01 | no |
| Rad23b   | 40.24  | 33.88  | -0.25 | 5.63E-01 | no |
| Cdc42    | 116.07 | 97.62  | -0.25 | 5.63E-01 | no |
| Bms1     | 27.77  | 23.35  | -0.25 | 5.63E-01 | no |
| Gtf3c2   | 37.51  | 31.53  | -0.25 | 5.63E-01 | no |
| Ltn1     | 21.74  | 18.26  | -0.25 | 5.63E-01 | no |
| Actn4    | 53.91  | 45.27  | -0.25 | 5.63E-01 | no |
| Rplp2    | 304.33 | 255.55 | -0.25 | 5.63E-01 | no |
| P4hb     | 59.08  | 49.58  | -0.25 | 5.63E-01 | no |
| Skil     | 13.41  | 11.24  | -0.25 | 5.63E-01 | no |
| Klhl6    | 95.43  | 80.01  | -0.25 | 5.63E-01 | no |
| Actr3    | 147.35 | 123.50 | -0.25 | 5.63E-01 | no |
| Nup214   | 20.39  | 17.09  | -0.25 | 5.63E-01 | no |
| Rhoa     | 175.90 | 147.26 | -0.26 | 5.63E-01 | no |

|              |        |        |       |          |    |
|--------------|--------|--------|-------|----------|----|
| Rap1b        | 61.29  | 51.29  | -0.26 | 5.63E-01 | no |
| Hyou1        | 31.82  | 26.63  | -0.26 | 5.63E-01 | no |
| Atrx         | 41.84  | 34.98  | -0.26 | 5.63E-01 | no |
| D15Ert621e   | 20.25  | 16.92  | -0.26 | 5.63E-01 | no |
| Hadha        | 30.29  | 25.30  | -0.26 | 5.63E-01 | no |
| Rpl37        | 158.79 | 132.52 | -0.26 | 5.63E-01 | no |
| Sart3        | 31.38  | 26.19  | -0.26 | 5.63E-01 | no |
| Raf1         | 35.46  | 29.59  | -0.26 | 5.63E-01 | no |
| Eif5b        | 18.88  | 15.75  | -0.26 | 5.63E-01 | no |
| Cd2bp2       | 35.04  | 29.22  | -0.26 | 5.63E-01 | no |
| Pebp1        | 89.06  | 74.20  | -0.26 | 5.63E-01 | no |
| Srgap2       | 13.12  | 10.92  | -0.26 | 5.63E-01 | no |
| Mfap3        | 18.86  | 15.70  | -0.26 | 5.63E-01 | no |
| Spop         | 37.76  | 31.42  | -0.27 | 5.63E-01 | no |
| Pigq         | 30.72  | 25.54  | -0.27 | 5.63E-01 | no |
| Pank2        | 25.08  | 20.84  | -0.27 | 5.63E-01 | no |
| Sap130       | 22.69  | 18.85  | -0.27 | 5.63E-01 | no |
| Ncoa5        | 26.80  | 22.24  | -0.27 | 5.63E-01 | no |
| Plekhf2      | 41.75  | 34.65  | -0.27 | 5.63E-01 | no |
| Spty2d1      | 15.72  | 13.05  | -0.27 | 5.63E-01 | no |
| Grif1        | 9.89   | 8.20   | -0.27 | 5.63E-01 | no |
| Brpf3        | 14.73  | 12.21  | -0.27 | 5.63E-01 | no |
| Ap1m1        | 46.63  | 38.64  | -0.27 | 5.63E-01 | no |
| Dync2h1      | 6.31   | 5.23   | -0.27 | 5.63E-01 | no |
| Afg3l1       | 15.45  | 12.76  | -0.28 | 5.63E-01 | no |
| Dnajb1       | 35.47  | 29.28  | -0.28 | 5.63E-01 | no |
| Uhrf1bp1l    | 12.94  | 10.68  | -0.28 | 5.63E-01 | no |
| Bzw2         | 40.87  | 33.74  | -0.28 | 5.63E-01 | no |
| Psm13        | 44.08  | 36.39  | -0.28 | 5.63E-01 | no |
| Mum1         | 18.87  | 15.56  | -0.28 | 5.63E-01 | no |
| Sh2b3        | 31.70  | 26.10  | -0.28 | 5.63E-01 | no |
| 2700049A03Ri | 11.16  | 9.18   | -0.28 | 5.63E-01 | no |
| Hmgxb4       | 18.91  | 15.52  | -0.28 | 5.63E-01 | no |
| Oat          | 36.10  | 29.63  | -0.28 | 5.63E-01 | no |
| Tsc22d2      | 7.82   | 6.41   | -0.29 | 5.63E-01 | no |
| Tecr         | 42.62  | 34.83  | -0.29 | 5.63E-01 | no |
| Ttll4        | 14.01  | 11.43  | -0.29 | 5.63E-01 | no |
| Cnot10       | 21.99  | 17.94  | -0.29 | 5.63E-01 | no |
| Atad3a       | 21.50  | 17.53  | -0.29 | 5.63E-01 | no |
| Rttm         | 8.10   | 6.60   | -0.29 | 5.63E-01 | no |
| Ruvbl2       | 34.88  | 28.44  | -0.29 | 5.63E-01 | no |
| Notch2       | 5.55   | 4.52   | -0.30 | 5.63E-01 | no |

|          |       |       |       |          |    |
|----------|-------|-------|-------|----------|----|
| Ppid     | 35.74 | 29.11 | -0.30 | 5.63E-01 | no |
| Drg1     | 42.25 | 34.41 | -0.30 | 5.63E-01 | no |
| Paip2b   | 20.13 | 16.38 | -0.30 | 5.63E-01 | no |
| Pgrmc2   | 18.33 | 14.90 | -0.30 | 5.63E-01 | no |
| Ndufa10  | 39.62 | 32.19 | -0.30 | 5.63E-01 | no |
| Eif3g    | 45.38 | 36.84 | -0.30 | 5.63E-01 | no |
| Fam60a   | 24.39 | 19.80 | -0.30 | 5.63E-01 | no |
| Faf1     | 13.54 | 10.99 | -0.30 | 5.63E-01 | no |
| Tdp2     | 33.57 | 27.24 | -0.30 | 5.63E-01 | no |
| Taf1d    | 43.92 | 35.62 | -0.30 | 5.63E-01 | no |
| Mrps25   | 10.29 | 8.33  | -0.30 | 5.63E-01 | no |
| Emd      | 44.55 | 36.01 | -0.31 | 5.63E-01 | no |
| Fam96a   | 38.92 | 31.45 | -0.31 | 5.63E-01 | no |
| Prpsap2  | 21.78 | 17.60 | -0.31 | 5.63E-01 | no |
| Prkag1   | 32.55 | 26.30 | -0.31 | 5.63E-01 | no |
| Gpr107   | 12.28 | 9.88  | -0.31 | 5.63E-01 | no |
| Tpd52l2  | 19.76 | 15.87 | -0.32 | 5.63E-01 | no |
| Grpel1   | 13.54 | 10.87 | -0.32 | 5.63E-01 | no |
| Hccs     | 20.42 | 16.33 | -0.32 | 5.63E-01 | no |
| Donson   | 17.10 | 13.65 | -0.33 | 5.63E-01 | no |
| Ecsit    | 21.46 | 17.12 | -0.33 | 5.63E-01 | no |
| Denr     | 19.68 | 15.67 | -0.33 | 5.63E-01 | no |
| Rrp8     | 17.95 | 14.29 | -0.33 | 5.63E-01 | no |
| AK010878 | 20.48 | 16.29 | -0.33 | 5.63E-01 | no |
| Ankrd32  | 12.31 | 9.76  | -0.33 | 5.63E-01 | no |
| D2Wsu81e | 19.42 | 15.40 | -0.33 | 5.63E-01 | no |
| Pdk3     | 20.44 | 16.18 | -0.34 | 5.63E-01 | no |
| Ndufa4   | 75.73 | 59.93 | -0.34 | 5.63E-01 | no |
| Acp5     | 23.40 | 18.52 | -0.34 | 5.63E-01 | no |
| Rpap3    | 15.18 | 11.98 | -0.34 | 5.63E-01 | no |
| Chst12   | 18.72 | 14.74 | -0.35 | 5.63E-01 | no |
| Tmem97   | 27.64 | 21.75 | -0.35 | 5.63E-01 | no |
| Atpaf2   | 18.84 | 14.80 | -0.35 | 5.63E-01 | no |
| Myg1     | 22.18 | 17.43 | -0.35 | 5.63E-01 | no |
| Dbr1     | 16.04 | 12.59 | -0.35 | 5.63E-01 | no |
| Tecpr2   | 3.99  | 3.13  | -0.35 | 5.63E-01 | no |
| Tank     | 14.50 | 11.36 | -0.35 | 5.63E-01 | no |
| Uchl1    | 24.99 | 19.55 | -0.35 | 5.63E-01 | no |
| Bahcc1   | 2.53  | 1.98  | -0.35 | 5.63E-01 | no |
| Vangl2   | 13.70 | 10.70 | -0.36 | 5.63E-01 | no |
| Wbscr16  | 12.76 | 9.95  | -0.36 | 5.63E-01 | no |
| Mrps14   | 17.52 | 13.62 | -0.36 | 5.63E-01 | no |

|               |       |       |       |          |    |
|---------------|-------|-------|-------|----------|----|
| Pcgf5         | 22.32 | 17.33 | -0.37 | 5.63E-01 | no |
| Pigh          | 13.13 | 10.18 | -0.37 | 5.63E-01 | no |
| 1110038B12Ri  | 46.43 | 36.00 | -0.37 | 5.63E-01 | no |
| Ap4m1         | 16.28 | 12.61 | -0.37 | 5.63E-01 | no |
| Trim65        | 9.15  | 7.08  | -0.37 | 5.63E-01 | no |
| Hace1         | 8.29  | 6.42  | -0.37 | 5.63E-01 | no |
| D19Erttd737e  | 15.91 | 12.31 | -0.37 | 5.63E-01 | no |
| Rps18         | 42.34 | 32.51 | -0.38 | 5.63E-01 | no |
| 1600002H07Ri  | 10.34 | 7.93  | -0.38 | 5.63E-01 | no |
| Rbmx2         | 11.15 | 8.47  | -0.40 | 5.63E-01 | no |
| Ccrn4l        | 6.94  | 5.27  | -0.40 | 5.63E-01 | no |
| Poli          | 7.09  | 5.38  | -0.40 | 5.63E-01 | no |
| Meaf6         | 21.78 | 16.48 | -0.40 | 5.63E-01 | no |
| Erf           | 5.47  | 4.13  | -0.41 | 5.63E-01 | no |
| Trappc1       | 28.88 | 21.81 | -0.41 | 5.63E-01 | no |
| Enpp6         | 6.82  | 5.14  | -0.41 | 5.63E-01 | no |
| Sit1          | 16.36 | 12.30 | -0.41 | 5.63E-01 | no |
| Gm5643        | 10.45 | 7.83  | -0.42 | 5.63E-01 | no |
| Mrps10        | 14.06 | 10.52 | -0.42 | 5.63E-01 | no |
| Lcorl         | 12.11 | 9.01  | -0.43 | 5.63E-01 | no |
| Rpp30         | 14.26 | 10.54 | -0.44 | 5.63E-01 | no |
| Hibch         | 9.34  | 6.90  | -0.44 | 5.63E-01 | no |
| Zfp341        | 4.15  | 3.06  | -0.44 | 5.63E-01 | no |
| Ftsj2         | 8.08  | 5.91  | -0.45 | 5.63E-01 | no |
| 1110004E09Ri  | 11.54 | 8.43  | -0.45 | 5.63E-01 | no |
| Fv1           | 8.87  | 6.34  | -0.48 | 5.63E-01 | no |
| 1810035L17Ril | 29.54 | 21.04 | -0.49 | 5.63E-01 | no |
| Chpt1         | 4.61  | 3.27  | -0.50 | 5.63E-01 | no |
| 2700023E23Ri  | 8.45  | 5.96  | -0.50 | 5.63E-01 | no |
| Fzd9          | 3.72  | 2.61  | -0.51 | 5.63E-01 | no |
| Zfp934        | 3.75  | 2.60  | -0.53 | 5.63E-01 | no |
| Tuba1a        | 4.48  | 3.10  | -0.53 | 5.63E-01 | no |
| A130022J15Ril | 2.01  | 1.38  | -0.54 | 5.63E-01 | no |
| Tmem216       | 6.09  | 4.18  | -0.54 | 5.63E-01 | no |
| Hrsp12        | 7.08  | 4.84  | -0.55 | 5.63E-01 | no |
| 1810046K07Ri  | 3.97  | 2.69  | -0.56 | 5.63E-01 | no |
| Rpl21         | 2.64  | 1.77  | -0.58 | 5.63E-01 | no |
| Flt3l         | 4.62  | 3.10  | -0.58 | 5.63E-01 | no |
| Sfxn5         | 1.09  | 0.73  | -0.59 | 5.63E-01 | no |
| Derl3         | 3.13  | 2.07  | -0.59 | 5.63E-01 | no |
| Grk4          | 1.40  | 0.91  | -0.62 | 5.63E-01 | no |
| Ranbp17       | 0.55  | 0.35  | -0.65 | 5.63E-01 | no |

|               |        |        |       |          |    |
|---------------|--------|--------|-------|----------|----|
| Pfkfb1        | 1.55   | 0.99   | -0.65 | 5.63E-01 | no |
| 2310014L17Ril | 0.66   | 0.41   | -0.68 | 5.63E-01 | no |
| Lmcd1         | 1.42   | 0.88   | -0.69 | 5.63E-01 | no |
| Trem1         | 1.21   | 0.74   | -0.71 | 5.63E-01 | no |
| Gpc1          | 0.42   | 0.25   | -0.77 | 5.63E-01 | no |
| P2ry1         | 0.44   | 0.25   | -0.80 | 5.63E-01 | no |
| Arl4d         | 1.02   | 0.57   | -0.84 | 5.63E-01 | no |
| Hba-a1,Hba-a2 | 3.13   | 1.75   | -0.84 | 5.63E-01 | no |
| Mllt4         | 0.15   | 0.08   | -0.85 | 5.63E-01 | no |
| Gm6787        | 0.94   | 0.52   | -0.85 | 5.63E-01 | no |
| Synpo2        | 0.15   | 0.08   | -0.86 | 5.63E-01 | no |
| 4-Sep         | 0.59   | 0.33   | -0.86 | 5.63E-01 | no |
| 4931417G12Ri  | 0.84   | 0.45   | -0.89 | 5.63E-01 | no |
| Fbp1          | 1.07   | 0.57   | -0.91 | 5.63E-01 | no |
| Naprt1        | 0.50   | 0.26   | -0.93 | 5.63E-01 | no |
| Ptprm         | 0.15   | 0.08   | -0.97 | 5.63E-01 | no |
| Cmklr1        | 0.32   | 0.16   | -1.00 | 5.63E-01 | no |
| Fcnb          | 0.63   | 0.29   | -1.14 | 5.63E-01 | no |
| Gpr110        | 0.20   | 0.09   | -1.21 | 5.63E-01 | no |
| Stxbp6        | 0.20   | 0.08   | -1.23 | 5.63E-01 | no |
| Tac4          | 0.47   | 0.19   | -1.28 | 5.63E-01 | no |
| Ccr11         | 0.25   | 0.09   | -1.49 | 5.63E-01 | no |
| Mpzl1         | 0.42   | 0.15   | -1.52 | 5.63E-01 | no |
| Nudt17        | 0.36   | 0.12   | -1.55 | 5.63E-01 | no |
| 9130024F11Ri  | 0.14   | 0.04   | -1.77 | 5.63E-01 | no |
| Aox3l1        | 0.08   | 0.02   | -1.93 | 5.63E-01 | no |
| Ptprn         | 0.11   | 0.03   | -1.99 | 5.63E-01 | no |
| Htra4         | 0.15   | 0.03   | -2.11 | 5.63E-01 | no |
| Plin4         | 0.08   | 0.02   | -2.26 | 5.63E-01 | no |
| Cpa3          | 0.36   | 0.05   | -2.75 | 5.63E-01 | no |
| Add2          | 0.15   | 0.02   | -2.81 | 5.63E-01 | no |
| Hist3h2bb-ps  | 1.09   | 0.08   | -3.85 | 5.63E-01 | no |
| Tmem22        | 1.86   | 2.82   | 0.60  | 5.63E-01 | no |
| Pla2g7        | 0.52   | 0.88   | 0.76  | 5.63E-01 | no |
| 4933424B01Ri  | 24.59  | 20.38  | -0.27 | 5.63E-01 | no |
| Gm70          | 0.34   | 0.12   | -1.48 | 5.63E-01 | no |
| Ube2j2        | 8.48   | 6.50   | -0.38 | 5.63E-01 | no |
| AI507597      | 0.47   | 0.95   | 1.02  | 5.63E-01 | no |
| 5730577I03Rik | 1.27   | 1.92   | 0.59  | 5.63E-01 | no |
| Eif3c         | 69.90  | 59.12  | -0.24 | 5.63E-01 | no |
| Gm6654        | 185.30 | 155.66 | -0.25 | 5.63E-01 | no |
| Psmg2         | 27.74  | 21.57  | -0.36 | 5.63E-01 | no |

|               |        |        |       |          |    |
|---------------|--------|--------|-------|----------|----|
| 1500009L16Ril | 1.96   | 3.04   | 0.63  | 5.63E-01 | no |
| Coro2b        | 2.07   | 2.89   | 0.48  | 5.63E-01 | no |
| Gcc1          | 7.95   | 9.85   | 0.31  | 5.63E-01 | no |
| Gm88          | 0.69   | 0.38   | -0.87 | 5.63E-01 | no |
| Grsf1         | 28.29  | 23.75  | -0.25 | 5.64E-01 | no |
| Pccb          | 8.12   | 10.52  | 0.37  | 5.64E-01 | no |
| Elmo3         | 1.73   | 2.45   | 0.50  | 5.64E-01 | no |
| Ints3         | 21.32  | 17.97  | -0.25 | 5.64E-01 | no |
| Id1           | 1.02   | 0.55   | -0.90 | 5.64E-01 | no |
| Csnk2b        | 49.15  | 40.13  | -0.29 | 5.64E-01 | no |
| Eif3b         | 60.18  | 50.91  | -0.24 | 5.65E-01 | no |
| Dnajc28       | 1.69   | 2.41   | 0.51  | 5.65E-01 | no |
| Cmtm8         | 2.98   | 1.92   | -0.63 | 5.65E-01 | no |
| Ces2g         | 0.17   | 0.03   | -2.69 | 5.65E-01 | no |
| Clock         | 4.35   | 5.47   | 0.33  | 5.65E-01 | no |
| 2210018M11R   | 19.64  | 16.31  | -0.27 | 5.65E-01 | no |
| Rnf8          | 17.08  | 13.66  | -0.32 | 5.65E-01 | no |
| Zfp248        | 0.85   | 1.27   | 0.58  | 5.66E-01 | no |
| Rg9mtd2       | 6.12   | 4.67   | -0.39 | 5.66E-01 | no |
| Gstm2         | 0.13   | 0.42   | 1.68  | 5.67E-01 | no |
| Atp5g2        | 277.57 | 234.75 | -0.24 | 5.67E-01 | no |
| Mical1        | 24.34  | 20.57  | -0.24 | 5.67E-01 | no |
| Ahcyl1        | 34.83  | 29.31  | -0.25 | 5.67E-01 | no |
| Ddx1          | 35.67  | 29.74  | -0.26 | 5.67E-01 | no |
| 9130008F23Ri  | 0.14   | 0.32   | 1.19  | 5.67E-01 | no |
| Atp6v1g1      | 44.45  | 54.18  | 0.29  | 5.67E-01 | no |
| Spast         | 24.22  | 20.72  | -0.23 | 5.67E-01 | no |
| Txn11         | 29.42  | 24.26  | -0.28 | 5.67E-01 | no |
| Caprin2       | 4.36   | 3.24   | -0.43 | 5.67E-01 | no |
| Me2           | 32.10  | 26.65  | -0.27 | 5.68E-01 | no |
| Gbp1          | 0.09   | 0.23   | 1.27  | 5.68E-01 | no |
| Prnd          | 0.02   | 0.12   | 2.47  | 5.68E-01 | no |
| Rbm6          | 35.11  | 30.34  | -0.21 | 5.68E-01 | no |
| Ank2          | 0.08   | 0.02   | -1.77 | 5.68E-01 | no |
| Gm614         | 1.48   | 2.48   | 0.74  | 5.69E-01 | no |
| Dzip1         | 0.73   | 1.08   | 0.58  | 5.69E-01 | no |
| Zfp708        | 2.86   | 3.99   | 0.48  | 5.69E-01 | no |
| Khsrp         | 60.68  | 51.41  | -0.24 | 5.69E-01 | no |
| Utp3          | 38.12  | 31.49  | -0.28 | 5.69E-01 | no |
| Wbscr22       | 25.30  | 20.13  | -0.33 | 5.69E-01 | no |
| Trmt12        | 4.06   | 3.03   | -0.42 | 5.69E-01 | no |
| Fabp5         | 13.35  | 9.74   | -0.45 | 5.69E-01 | no |



|               |        |        |           |          |    |
|---------------|--------|--------|-----------|----------|----|
| H3f3a         | 7.41   | 5.20   | -0.51     | 5.69E-01 | no |
| Gnmt          | 0.82   | 0.43   | -0.93     | 5.69E-01 | no |
| Ube2o         | 16.91  | 14.15  | -0.26     | 5.69E-01 | no |
| Tubgcp2       | 21.17  | 17.50  | -0.27     | 5.69E-01 | no |
| 9230110C19Ri  | 0.42   | 0.76   | 0.86      | 5.69E-01 | no |
| BC031361      | 0.49   | 0.76   | 0.62      | 5.69E-01 | no |
| Lnp           | 11.56  | 9.76   | -0.24     | 5.69E-01 | no |
| Trp53i11      | 68.68  | 57.94  | -0.25     | 5.69E-01 | no |
| Nudcd1        | 14.70  | 12.00  | -0.29     | 5.69E-01 | no |
| Stard3nl      | 11.97  | 8.86   | -0.43     | 5.69E-01 | no |
| Ddx27         | 28.31  | 23.60  | -0.26     | 5.69E-01 | no |
| Ncbp1         | 36.94  | 31.05  | -0.25     | 5.70E-01 | no |
| B3gnt11       | 4.06   | 5.42   | 0.42      | 5.70E-01 | no |
| Tmem143       | 5.97   | 4.41   | -0.44     | 5.70E-01 | no |
| Zfp773        | 2.71   | 3.75   | 0.47      | 5.70E-01 | no |
| Slc25a3       | 111.00 | 93.84  | -0.24     | 5.70E-01 | no |
| 2210016L21Ril | 13.21  | 16.97  | 0.36      | 5.70E-01 | no |
| Arl5a         | 59.50  | 50.33  | -0.24     | 5.70E-01 | no |
| Rpl10         | 20.80  | 15.60  | -0.42     | 5.70E-01 | no |
| Them4         | 3.02   | 2.05   | -0.56     | 5.70E-01 | no |
| Uba6          | 14.60  | 12.02  | -0.28     | 5.71E-01 | no |
| Polr3f        | 13.10  | 10.66  | -0.30     | 5.71E-01 | no |
| Nup210        | 80.53  | 67.67  | -0.25     | 5.71E-01 | no |
| Gigyf1        | 26.93  | 31.83  | 0.24      | 5.71E-01 | no |
| Osgepl1       | 4.95   | 3.58   | -0.47     | 5.71E-01 | no |
| Entpd7        | 4.90   | 3.83   | -0.36     | 5.71E-01 | no |
| Myo3b         | 0.01   | 0.05   | 2.29      | 5.72E-01 | no |
| Chst10        | 0.23   | 0.40   | 0.79      | 5.72E-01 | no |
| Gm5820        | 0.04   | 0.16   | 1.99      | 5.73E-01 | no |
| Ndufaf2       | 12.09  | 8.66   | -0.48     | 5.73E-01 | no |
| Rps3a         | 36.43  | 29.00  | -0.33     | 5.73E-01 | no |
| Arl6ip6       | 21.42  | 17.28  | -0.31     | 5.73E-01 | no |
| Mccc1         | 6.75   | 8.67   | 0.36      | 5.73E-01 | no |
| Gabpa         | 29.69  | 25.04  | -0.25     | 5.73E-01 | no |
| Hip1          | 1.76   | 1.30   | -0.44     | 5.73E-01 | no |
| Rplp1         | 649.30 | 550.82 | -0.24     | 5.73E-01 | no |
| Fam108b       | 22.86  | 18.53  | -0.30     | 5.74E-01 | no |
| Fstl1         | 0.30   | 0.17   | -0.86     | 5.74E-01 | no |
| Mphosph9      | 12.86  | 10.80  | -0.25     | 5.74E-01 | no |
| Gm8580        | 0.09   | 0.00   | -1.79769e | 5.74E-01 | no |
| Mboat7        | 15.05  | 12.15  | -0.31     | 5.75E-01 | no |
| Prmt6         | 12.24  | 14.99  | 0.29      | 5.75E-01 | no |

|              |       |       |           |          |    |
|--------------|-------|-------|-----------|----------|----|
| Utp6         | 19.40 | 16.12 | -0.27     | 5.75E-01 | no |
| Oxa1l        | 25.61 | 21.16 | -0.28     | 5.75E-01 | no |
| Zfp229       | 3.79  | 4.99  | 0.40      | 5.75E-01 | no |
| Ipp          | 15.36 | 12.12 | -0.34     | 5.75E-01 | no |
| Csrp1        | 63.07 | 53.08 | -0.25     | 5.75E-01 | no |
| Ptar1        | 10.06 | 7.67  | -0.39     | 5.75E-01 | no |
| Evi5         | 1.00  | 0.69  | -0.54     | 5.75E-01 | no |
| 1700020N18Ri | 1.10  | 1.96  | 0.84      | 5.76E-01 | no |
| Fgd3         | 9.02  | 11.23 | 0.32      | 5.77E-01 | no |
| Bicd2        | 20.57 | 17.74 | -0.21     | 5.77E-01 | no |
| Dci          | 13.23 | 9.90  | -0.42     | 5.77E-01 | no |
| Eif4e2       | 31.81 | 27.29 | -0.22     | 5.77E-01 | no |
| Mbd2         | 43.88 | 36.67 | -0.26     | 5.77E-01 | no |
| Gtf2h4       | 14.35 | 11.11 | -0.37     | 5.77E-01 | no |
| Lap3         | 14.23 | 11.30 | -0.33     | 5.77E-01 | no |
| Rbm43        | 21.37 | 25.87 | 0.28      | 5.77E-01 | no |
| Nlrp3        | 0.12  | 0.23  | 0.90      | 5.78E-01 | no |
| Insr         | 8.73  | 10.46 | 0.26      | 5.78E-01 | no |
| Wdr74        | 22.59 | 17.77 | -0.35     | 5.78E-01 | no |
| Plvap        | 0.33  | 0.56  | 0.77      | 5.78E-01 | no |
| D330012F22Ri | 4.17  | 5.48  | 0.39      | 5.78E-01 | no |
| Kif17        | 2.99  | 3.97  | 0.41      | 5.79E-01 | no |
| Notch4       | 0.24  | 0.15  | -0.71     | 5.79E-01 | no |
| 2610028H24Ri | 0.03  | 0.00  | -1.79769e | 5.79E-01 | no |
| Mfsd6l       | 0.10  | 0.26  | 1.33      | 5.79E-01 | no |
| Nsf          | 16.92 | 13.99 | -0.27     | 5.79E-01 | no |
| Rbm44        | 4.55  | 3.42  | -0.41     | 5.79E-01 | no |
| B330016D10Ri | 2.40  | 1.65  | -0.54     | 5.79E-01 | no |
| Srsf4        | 57.13 | 48.35 | -0.24     | 5.79E-01 | no |
| Tmem5        | 7.52  | 10.16 | 0.43      | 5.79E-01 | no |
| Btnl9        | 0.05  | 0.17  | 1.92      | 5.79E-01 | no |
| BC068157     | 0.45  | 0.70  | 0.63      | 5.79E-01 | no |
| Dctpp1       | 44.47 | 35.10 | -0.34     | 5.79E-01 | no |
| Itpa         | 22.56 | 17.69 | -0.35     | 5.79E-01 | no |
| Wdr35        | 4.82  | 3.73  | -0.37     | 5.79E-01 | no |
| Kif26a       | 0.06  | 0.02  | -1.70     | 5.79E-01 | no |
| Dlec1        | 0.07  | 0.14  | 1.03      | 5.80E-01 | no |
| Lemd2        | 13.61 | 16.70 | 0.30      | 5.80E-01 | no |
| Itgav        | 11.82 | 9.84  | -0.26     | 5.80E-01 | no |
| Iqgap2       | 13.41 | 11.15 | -0.27     | 5.80E-01 | no |
| D030018L15Ri | 0.11  | 0.19  | 0.83      | 5.81E-01 | no |
| Lass5        | 26.30 | 31.95 | 0.28      | 5.81E-01 | no |

|              |       |       |           |          |    |
|--------------|-------|-------|-----------|----------|----|
| Zbtb11       | 16.56 | 13.81 | -0.26     | 5.82E-01 | no |
| Zfp30        | 0.28  | 0.50  | 0.85      | 5.82E-01 | no |
| Zfp7         | 5.12  | 3.81  | -0.43     | 5.82E-01 | no |
| Nckap5l      | 1.85  | 2.48  | 0.43      | 5.82E-01 | no |
| Yars2        | 15.32 | 11.88 | -0.37     | 5.83E-01 | no |
| Pln          | 0.00  | 0.06  | 1.79769e+ | 5.84E-01 | no |
| Slc22a18     | 0.00  | 0.07  | 1.79769e+ | 5.84E-01 | no |
| Fpr3         | 0.00  | 0.05  | 1.79769e+ | 5.84E-01 | no |
| Crmp1        | 0.00  | 0.04  | 1.79769e+ | 5.84E-01 | no |
| BC049730     | 0.00  | 0.05  | 1.79769e+ | 5.84E-01 | no |
| Stfa1        | 0.00  | 0.14  | 1.79769e+ | 5.84E-01 | no |
| Ear12,Ear2   | 0.00  | 0.13  | 1.79769e+ | 5.84E-01 | no |
| 1600021P15Ri | 0.00  | 0.03  | 1.79769e+ | 5.84E-01 | no |
| 1700018C11Ri | 0.00  | 0.10  | 1.79769e+ | 5.84E-01 | no |
| 1700018L24Ri | 0.00  | 0.09  | 1.79769e+ | 5.84E-01 | no |
| 1700019A02Ri | 0.00  | 0.12  | 1.79769e+ | 5.84E-01 | no |
| 1700026J04Ri | 0.00  | 0.03  | 1.79769e+ | 5.84E-01 | no |
| 1810065E05Ri | 0.00  | 0.08  | 1.79769e+ | 5.84E-01 | no |
| 2610019F03Ri | 0.00  | 0.03  | 1.79769e+ | 5.84E-01 | no |
| 4921506M07R  | 0.00  | 0.04  | 1.79769e+ | 5.84E-01 | no |
| 4930412O13Ri | 0.00  | 0.02  | 1.79769e+ | 5.84E-01 | no |
| 4930430D24Ri | 0.00  | 0.06  | 1.79769e+ | 5.84E-01 | no |
| 9030224M15R  | 0.00  | 0.04  | 1.79769e+ | 5.84E-01 | no |
| Adamts13     | 0.00  | 0.01  | 1.79769e+ | 5.84E-01 | no |
| Adra1a       | 0.00  | 0.02  | 1.79769e+ | 5.84E-01 | no |
| Ankrd5       | 0.00  | 0.03  | 1.79769e+ | 5.84E-01 | no |
| Arhgef19     | 0.00  | 0.02  | 1.79769e+ | 5.84E-01 | no |
| Asb15        | 0.00  | 0.02  | 1.79769e+ | 5.84E-01 | no |
| Asphd2       | 0.00  | 0.04  | 1.79769e+ | 5.84E-01 | no |
| Atcay        | 0.00  | 0.02  | 1.79769e+ | 5.84E-01 | no |
| Atp6ap1l     | 0.00  | 0.07  | 1.79769e+ | 5.84E-01 | no |
| Atp6v1b1     | 0.00  | 0.03  | 1.79769e+ | 5.84E-01 | no |
| Atp6v1e2     | 0.00  | 0.06  | 1.79769e+ | 5.84E-01 | no |
| BC018465     | 0.00  | 0.04  | 1.79769e+ | 5.84E-01 | no |
| BC048562     | 0.00  | 0.09  | 1.79769e+ | 5.84E-01 | no |
| BC048671     | 0.00  | 0.06  | 1.79769e+ | 5.84E-01 | no |
| Bdkrb2       | 0.00  | 0.04  | 1.79769e+ | 5.84E-01 | no |
| Btn2a2       | 0.00  | 0.02  | 1.79769e+ | 5.84E-01 | no |
| C86695       | 0.00  | 0.03  | 1.79769e+ | 5.84E-01 | no |
| Cabp7        | 0.00  | 0.08  | 1.79769e+ | 5.84E-01 | no |
| Cacna1f      | 0.00  | 0.01  | 1.79769e+ | 5.84E-01 | no |
| Ccdc147      | 0.00  | 0.02  | 1.79769e+ | 5.84E-01 | no |

|             |      |      |           |          |    |
|-------------|------|------|-----------|----------|----|
| Ccno        | 0.00 | 0.04 | 1.79769e+ | 5.84E-01 | no |
| Cd209b      | 0.00 | 0.04 | 1.79769e+ | 5.84E-01 | no |
| Cd209e      | 0.00 | 0.05 | 1.79769e+ | 5.84E-01 | no |
| Cdh10       | 0.00 | 0.02 | 1.79769e+ | 5.84E-01 | no |
| Cdh16       | 0.00 | 0.02 | 1.79769e+ | 5.84E-01 | no |
| Clec18a     | 0.00 | 0.03 | 1.79769e+ | 5.84E-01 | no |
| Col4a2      | 0.00 | 0.01 | 1.79769e+ | 5.84E-01 | no |
| Cpn2        | 0.00 | 0.01 | 1.79769e+ | 5.84E-01 | no |
| Cpne8       | 0.00 | 0.03 | 1.79769e+ | 5.84E-01 | no |
| Crb1        | 0.00 | 0.02 | 1.79769e+ | 5.84E-01 | no |
| Cryaa       | 0.00 | 0.06 | 1.79769e+ | 5.84E-01 | no |
| Cspg4       | 0.00 | 0.01 | 1.79769e+ | 5.84E-01 | no |
| Ctnna3      | 0.00 | 0.02 | 1.79769e+ | 5.84E-01 | no |
| D430019H16R | 0.00 | 0.08 | 1.79769e+ | 5.84E-01 | no |
| Dbh         | 0.00 | 0.03 | 1.79769e+ | 5.84E-01 | no |
| Defb23      | 0.00 | 0.11 | 1.79769e+ | 5.84E-01 | no |
| Dlx6        | 0.00 | 0.06 | 1.79769e+ | 5.84E-01 | no |
| Dpcr1       | 0.00 | 0.03 | 1.79769e+ | 5.84E-01 | no |
| Dydc1       | 0.00 | 0.07 | 1.79769e+ | 5.84E-01 | no |
| Ednra       | 0.00 | 0.02 | 1.79769e+ | 5.84E-01 | no |
| Efhc2       | 0.00 | 0.03 | 1.79769e+ | 5.84E-01 | no |
| Ehf         | 0.00 | 0.02 | 1.79769e+ | 5.84E-01 | no |
| Epn3        | 0.00 | 0.02 | 1.79769e+ | 5.84E-01 | no |
| Esp31       | 0.00 | 0.09 | 1.79769e+ | 5.84E-01 | no |
| Espn        | 0.00 | 0.02 | 1.79769e+ | 5.84E-01 | no |
| Fam164b     | 0.00 | 0.07 | 1.79769e+ | 5.84E-01 | no |
| Fam176a     | 0.00 | 0.04 | 1.79769e+ | 5.84E-01 | no |
| Fam65c      | 0.00 | 0.02 | 1.79769e+ | 5.84E-01 | no |
| Fam83a      | 0.00 | 0.03 | 1.79769e+ | 5.84E-01 | no |
| Fasl        | 0.00 | 0.04 | 1.79769e+ | 5.84E-01 | no |
| Fbxo43      | 0.00 | 0.02 | 1.79769e+ | 5.84E-01 | no |
| Fkbp6       | 0.00 | 0.05 | 1.79769e+ | 5.84E-01 | no |
| Fndc3c1     | 0.00 | 0.02 | 1.79769e+ | 5.84E-01 | no |
| Foxl2os     | 0.00 | 0.02 | 1.79769e+ | 5.84E-01 | no |
| Fstl4       | 0.00 | 0.02 | 1.79769e+ | 5.84E-01 | no |
| Gcg         | 0.00 | 0.07 | 1.79769e+ | 5.84E-01 | no |
| Gif         | 0.00 | 0.05 | 1.79769e+ | 5.84E-01 | no |
| Gm11541     | 0.00 | 0.05 | 1.79769e+ | 5.84E-01 | no |
| Gm13271     | 0.00 | 0.11 | 1.79769e+ | 5.84E-01 | no |
| Gm14124     | 0.00 | 0.03 | 1.79769e+ | 5.84E-01 | no |
| Gm2897      | 0.00 | 0.04 | 1.79769e+ | 5.84E-01 | no |
| Gm4489      | 0.00 | 0.14 | 1.79769e+ | 5.84E-01 | no |

|           |      |      |           |          |    |
|-----------|------|------|-----------|----------|----|
| Gm52      | 0.00 | 0.04 | 1.79769e+ | 5.84E-01 | no |
| Gm5592    | 0.00 | 0.02 | 1.79769e+ | 5.84E-01 | no |
| Gm5647    | 0.00 | 0.10 | 1.79769e+ | 5.84E-01 | no |
| Gm628     | 0.00 | 0.03 | 1.79769e+ | 5.84E-01 | no |
| Gm6484    | 0.00 | 0.06 | 1.79769e+ | 5.84E-01 | no |
| Gm8884    | 0.00 | 0.17 | 1.79769e+ | 5.84E-01 | no |
| Gpr75     | 0.00 | 0.05 | 1.79769e+ | 5.84E-01 | no |
| Grm2      | 0.00 | 0.02 | 1.79769e+ | 5.84E-01 | no |
| Guca2b    | 0.00 | 0.10 | 1.79769e+ | 5.84E-01 | no |
| Hamp      | 0.00 | 0.17 | 1.79769e+ | 5.84E-01 | no |
| Hapln2    | 0.00 | 0.03 | 1.79769e+ | 5.84E-01 | no |
| Hcrt      | 0.00 | 0.11 | 1.79769e+ | 5.84E-01 | no |
| Igsf11    | 0.00 | 0.02 | 1.79769e+ | 5.84E-01 | no |
| Il1rapl2  | 0.00 | 0.03 | 1.79769e+ | 5.84E-01 | no |
| Impg1     | 0.00 | 0.02 | 1.79769e+ | 5.84E-01 | no |
| Jakmip3   | 0.00 | 0.01 | 1.79769e+ | 5.84E-01 | no |
| Jph2      | 0.00 | 0.02 | 1.79769e+ | 5.84E-01 | no |
| Kcna7     | 0.00 | 0.02 | 1.79769e+ | 5.84E-01 | no |
| Kcne2     | 0.00 | 0.04 | 1.79769e+ | 5.84E-01 | no |
| Krt42     | 0.00 | 0.04 | 1.79769e+ | 5.84E-01 | no |
| Krtap16-7 | 0.00 | 0.11 | 1.79769e+ | 5.84E-01 | no |
| Lama3     | 0.00 | 0.01 | 1.79769e+ | 5.84E-01 | no |
| Larp6     | 0.00 | 0.03 | 1.79769e+ | 5.84E-01 | no |
| Lcn12     | 0.00 | 0.09 | 1.79769e+ | 5.84E-01 | no |
| Lgals7    | 0.00 | 0.10 | 1.79769e+ | 5.84E-01 | no |
| Lhx1      | 0.00 | 0.03 | 1.79769e+ | 5.84E-01 | no |
| Ltb4r2    | 0.00 | 0.07 | 1.79769e+ | 5.84E-01 | no |
| Lypd6b    | 0.00 | 0.03 | 1.79769e+ | 5.84E-01 | no |
| Mapk15    | 0.00 | 0.03 | 1.79769e+ | 5.84E-01 | no |
| 11-Mar    | 0.00 | 0.05 | 1.79769e+ | 5.84E-01 | no |
| Mas1      | 0.00 | 0.03 | 1.79769e+ | 5.84E-01 | no |
| Mc2r      | 0.00 | 0.06 | 1.79769e+ | 5.84E-01 | no |
| Mfi2      | 0.00 | 0.02 | 1.79769e+ | 5.84E-01 | no |
| Mgat5b    | 0.00 | 0.01 | 1.79769e+ | 5.84E-01 | no |
| Miox      | 0.00 | 0.06 | 1.79769e+ | 5.84E-01 | no |
| Mixl1     | 0.00 | 0.04 | 1.79769e+ | 5.84E-01 | no |
| Morc1     | 0.00 | 0.02 | 1.79769e+ | 5.84E-01 | no |
| Morc2b    | 0.00 | 0.02 | 1.79769e+ | 5.84E-01 | no |
| Mrgpra6   | 0.00 | 0.11 | 1.79769e+ | 5.84E-01 | no |
| Mup20     | 0.00 | 0.09 | 1.79769e+ | 5.84E-01 | no |
| Mybph     | 0.00 | 0.03 | 1.79769e+ | 5.84E-01 | no |
| Myh13     | 0.00 | 0.01 | 1.79769e+ | 5.84E-01 | no |

|         |      |      |           |          |    |
|---------|------|------|-----------|----------|----|
| Nefm    | 0.00 | 0.02 | 1.79769e+ | 5.84E-01 | no |
| Nepn    | 0.00 | 0.04 | 1.79769e+ | 5.84E-01 | no |
| Nodal   | 0.00 | 0.03 | 1.79769e+ | 5.84E-01 | no |
| Npas3   | 0.00 | 0.01 | 1.79769e+ | 5.84E-01 | no |
| Npdc1   | 0.00 | 0.04 | 1.79769e+ | 5.84E-01 | no |
| Oxt     | 0.00 | 0.13 | 1.79769e+ | 5.84E-01 | no |
| P4ha3   | 0.00 | 0.03 | 1.79769e+ | 5.84E-01 | no |
| Panx3   | 0.00 | 0.03 | 1.79769e+ | 5.84E-01 | no |
| Pappa2  | 0.00 | 0.01 | 1.79769e+ | 5.84E-01 | no |
| Pdcl2   | 0.00 | 0.07 | 1.79769e+ | 5.84E-01 | no |
| Pde6h   | 0.00 | 0.11 | 1.79769e+ | 5.84E-01 | no |
| Pdlim4  | 0.00 | 0.05 | 1.79769e+ | 5.84E-01 | no |
| Pet2    | 0.00 | 0.02 | 1.79769e+ | 5.84E-01 | no |
| Pkia    | 0.00 | 0.03 | 1.79769e+ | 5.84E-01 | no |
| Pla2g2d | 0.00 | 0.03 | 1.79769e+ | 5.84E-01 | no |
| Pnmal1  | 0.00 | 0.04 | 1.79769e+ | 5.84E-01 | no |
| Pnpla1  | 0.00 | 0.01 | 1.79769e+ | 5.84E-01 | no |
| Ppm1n   | 0.00 | 0.04 | 1.79769e+ | 5.84E-01 | no |
| Prokr2  | 0.00 | 0.02 | 1.79769e+ | 5.84E-01 | no |
| Prrt1   | 0.00 | 0.07 | 1.79769e+ | 5.84E-01 | no |
| Prss44  | 0.00 | 0.04 | 1.79769e+ | 5.84E-01 | no |
| Psg19   | 0.00 | 0.03 | 1.79769e+ | 5.84E-01 | no |
| Ptgfrn  | 0.00 | 0.01 | 1.79769e+ | 5.84E-01 | no |
| Pth2r   | 0.00 | 0.03 | 1.79769e+ | 5.84E-01 | no |
| Rbfox3  | 0.00 | 0.02 | 1.79769e+ | 5.84E-01 | no |
| Retnlb  | 0.00 | 0.11 | 1.79769e+ | 5.84E-01 | no |
| Rnf182  | 0.00 | 0.02 | 1.79769e+ | 5.84E-01 | no |
| Rnf217  | 0.00 | 0.03 | 1.79769e+ | 5.84E-01 | no |
| Rnu11   | 0.00 | 0.91 | 1.79769e+ | 5.84E-01 | no |
| Rsph6a  | 0.00 | 0.02 | 1.79769e+ | 5.84E-01 | no |
| Rxfp3   | 0.00 | 0.02 | 1.79769e+ | 5.84E-01 | no |
| Samd12  | 0.00 | 0.07 | 1.79769e+ | 5.84E-01 | no |
| Sat2    | 0.00 | 0.08 | 1.79769e+ | 5.84E-01 | no |
| Scgb1c1 | 0.00 | 0.15 | 1.79769e+ | 5.84E-01 | no |
| Scn1b   | 0.00 | 0.04 | 1.79769e+ | 5.84E-01 | no |
| Scn9a   | 0.00 | 0.01 | 1.79769e+ | 5.84E-01 | no |
| Scrt2   | 0.00 | 0.02 | 1.79769e+ | 5.84E-01 | no |
| Sdc2    | 0.00 | 0.03 | 1.79769e+ | 5.84E-01 | no |
| Sec14l5 | 0.00 | 0.03 | 1.79769e+ | 5.84E-01 | no |
| Sema3d  | 0.00 | 0.01 | 1.79769e+ | 5.84E-01 | no |
| 12-Sep  | 0.00 | 0.05 | 1.79769e+ | 5.84E-01 | no |
| Sfrp5   | 0.00 | 0.03 | 1.79769e+ | 5.84E-01 | no |

|              |      |      |           |          |    |
|--------------|------|------|-----------|----------|----|
| Sgk2         | 0.00 | 0.03 | 1.79769e+ | 5.84E-01 | no |
| Sh2d1b2      | 0.00 | 0.20 | 1.79769e+ | 5.84E-01 | no |
| Slc15a1      | 0.00 | 0.02 | 1.79769e+ | 5.84E-01 | no |
| Slc1a1       | 0.00 | 0.02 | 1.79769e+ | 5.84E-01 | no |
| Slc24a4      | 0.00 | 0.03 | 1.79769e+ | 5.84E-01 | no |
| Slc26a5      | 0.00 | 0.03 | 1.79769e+ | 5.84E-01 | no |
| Slc35f4      | 0.00 | 0.04 | 1.79769e+ | 5.84E-01 | no |
| Slc6a12      | 0.00 | 0.03 | 1.79769e+ | 5.84E-01 | no |
| Slc7a12      | 0.00 | 0.06 | 1.79769e+ | 5.84E-01 | no |
| Slc9a3       | 0.00 | 0.03 | 1.79769e+ | 5.84E-01 | no |
| Slitrk5      | 0.00 | 0.02 | 1.79769e+ | 5.84E-01 | no |
| Snai2        | 0.00 | 0.04 | 1.79769e+ | 5.84E-01 | no |
| Sparcl1      | 0.00 | 0.02 | 1.79769e+ | 5.84E-01 | no |
| Spp2         | 0.00 | 0.08 | 1.79769e+ | 5.84E-01 | no |
| Sprr2a2      | 0.00 | 0.03 | 1.79769e+ | 5.84E-01 | no |
| Stk32b       | 0.00 | 0.02 | 1.79769e+ | 5.84E-01 | no |
| Stmn3        | 0.00 | 0.06 | 1.79769e+ | 5.84E-01 | no |
| Susd4        | 0.00 | 0.03 | 1.79769e+ | 5.84E-01 | no |
| Sycp1        | 0.00 | 0.02 | 1.79769e+ | 5.84E-01 | no |
| Syt16        | 0.00 | 0.03 | 1.79769e+ | 5.84E-01 | no |
| Syt9         | 0.00 | 0.02 | 1.79769e+ | 5.84E-01 | no |
| Tbx1         | 0.00 | 0.04 | 1.79769e+ | 5.84E-01 | no |
| Tchh         | 0.00 | 0.01 | 1.79769e+ | 5.84E-01 | no |
| Tectb        | 0.00 | 0.03 | 1.79769e+ | 5.84E-01 | no |
| Tex101       | 0.00 | 0.06 | 1.79769e+ | 5.84E-01 | no |
| Tll2         | 0.00 | 0.02 | 1.79769e+ | 5.84E-01 | no |
| Tmem178      | 0.00 | 0.04 | 1.79769e+ | 5.84E-01 | no |
| Tmem47       | 0.00 | 0.03 | 1.79769e+ | 5.84E-01 | no |
| Tmem8c       | 0.00 | 0.05 | 1.79769e+ | 5.84E-01 | no |
| Trim60       | 0.00 | 0.02 | 1.79769e+ | 5.84E-01 | no |
| Trnp1        | 0.00 | 0.04 | 1.79769e+ | 5.84E-01 | no |
| Tshz2        | 0.00 | 0.01 | 1.79769e+ | 5.84E-01 | no |
| Utf1         | 0.00 | 0.05 | 1.79769e+ | 5.84E-01 | no |
| Uts2         | 0.00 | 0.11 | 1.79769e+ | 5.84E-01 | no |
| Vsnl1        | 0.00 | 0.04 | 1.79769e+ | 5.84E-01 | no |
| Xkr6         | 0.00 | 0.03 | 1.79769e+ | 5.84E-01 | no |
| Yipf7        | 0.00 | 0.07 | 1.79769e+ | 5.84E-01 | no |
| Zbtb7c       | 0.00 | 0.01 | 1.79769e+ | 5.84E-01 | no |
| Zim1         | 0.00 | 0.02 | 1.79769e+ | 5.84E-01 | no |
| 1700015E13Ri | 0.00 | 0.10 | 1.79769e+ | 5.84E-01 | no |
| 1700022P22Ri | 0.00 | 0.16 | 1.79769e+ | 5.84E-01 | no |
| 4921536K21Ri | 0.00 | 0.03 | 1.79769e+ | 5.84E-01 | no |

|              |      |      |            |          |    |
|--------------|------|------|------------|----------|----|
| Apoc1        | 0.00 | 0.15 | 1.79769e+  | 5.84E-01 | no |
| C3ar1        | 0.00 | 0.02 | 1.79769e+  | 5.84E-01 | no |
| Casr         | 0.00 | 0.02 | 1.79769e+  | 5.84E-01 | no |
| Ccdc13       | 0.00 | 0.02 | 1.79769e+  | 5.84E-01 | no |
| Cpn1         | 0.00 | 0.04 | 1.79769e+  | 5.84E-01 | no |
| Crhr1        | 0.00 | 0.03 | 1.79769e+  | 5.84E-01 | no |
| Cyp7b1       | 0.00 | 0.04 | 1.79769e+  | 5.84E-01 | no |
| Dnahc2       | 0.00 | 0.01 | 1.79769e+  | 5.84E-01 | no |
| Fgf9         | 0.00 | 0.02 | 1.79769e+  | 5.84E-01 | no |
| Foxh1        | 0.00 | 0.06 | 1.79769e+  | 5.84E-01 | no |
| Gm10768      | 0.00 | 0.04 | 1.79769e+  | 5.84E-01 | no |
| Gm9047       | 0.00 | 0.11 | 1.79769e+  | 5.84E-01 | no |
| Gpr115       | 0.00 | 0.03 | 1.79769e+  | 5.84E-01 | no |
| Hnmt         | 0.00 | 0.05 | 1.79769e+  | 5.84E-01 | no |
| Il20ra       | 0.00 | 0.03 | 1.79769e+  | 5.84E-01 | no |
| Klkb1        | 0.00 | 0.03 | 1.79769e+  | 5.84E-01 | no |
| LOC10030364! | 0.00 | 0.03 | 1.79769e+  | 5.84E-01 | no |
| Pcdh1        | 0.00 | 0.02 | 1.79769e+  | 5.84E-01 | no |
| Slc32a1      | 0.00 | 0.03 | 1.79769e+  | 5.84E-01 | no |
| Slfn14-ps    | 0.00 | 0.02 | 1.79769e+  | 5.84E-01 | no |
| Tdgf1        | 0.00 | 0.04 | 1.79769e+  | 5.84E-01 | no |
| Themis       | 0.00 | 0.02 | 1.79769e+  | 5.84E-01 | no |
| Trpm1        | 0.00 | 0.02 | 1.79769e+  | 5.84E-01 | no |
| Wdr63        | 0.00 | 0.02 | 1.79769e+  | 5.84E-01 | no |
| Zcchc12      | 0.00 | 0.03 | 1.79769e+  | 5.84E-01 | no |
| Zfp536       | 0.00 | 0.02 | 1.79769e+  | 5.84E-01 | no |
| Slc5a2       | 0.04 | 0.00 | -1.79769e- | 5.84E-01 | no |
| Fbxl13       | 0.05 | 0.00 | -1.79769e- | 5.84E-01 | no |
| Unc93a       | 0.02 | 0.00 | -1.79769e- | 5.84E-01 | no |
| 1700023E05Ri | 0.05 | 0.00 | -1.79769e- | 5.84E-01 | no |
| 2510049J12Ri | 0.03 | 0.00 | -1.79769e- | 5.84E-01 | no |
| 4930402F06Ri | 0.06 | 0.00 | -1.79769e- | 5.84E-01 | no |
| 4933411K16Ri | 0.05 | 0.00 | -1.79769e- | 5.84E-01 | no |
| Aldh1a7      | 0.04 | 0.00 | -1.79769e- | 5.84E-01 | no |
| Ankrd43      | 0.02 | 0.00 | -1.79769e- | 5.84E-01 | no |
| Ano1         | 0.02 | 0.00 | -1.79769e- | 5.84E-01 | no |
| Arhgap42     | 0.02 | 0.00 | -1.79769e- | 5.84E-01 | no |
| BC052688     | 0.06 | 0.00 | -1.79769e- | 5.84E-01 | no |
| Chrna9       | 0.04 | 0.00 | -1.79769e- | 5.84E-01 | no |
| Cnga4        | 0.03 | 0.00 | -1.79769e- | 5.84E-01 | no |
| Creb3l3      | 0.03 | 0.00 | -1.79769e- | 5.84E-01 | no |
| E230025N22Ri | 0.04 | 0.00 | -1.79769e- | 5.84E-01 | no |



|              |      |      |           |          |    |
|--------------|------|------|-----------|----------|----|
| Gm1332       | 0.11 | 0.00 | -1.79769e | 5.84E-01 | no |
| Gm364        | 0.05 | 0.00 | -1.79769e | 5.84E-01 | no |
| Gm6813       | 0.14 | 0.00 | -1.79769e | 5.84E-01 | no |
| Hpx          | 0.05 | 0.00 | -1.79769e | 5.84E-01 | no |
| Kcnh6        | 0.03 | 0.00 | -1.79769e | 5.84E-01 | no |
| Kndc1        | 0.01 | 0.00 | -1.79769e | 5.84E-01 | no |
| Kremen2      | 0.03 | 0.00 | -1.79769e | 5.84E-01 | no |
| Lgi4         | 0.02 | 0.00 | -1.79769e | 5.84E-01 | no |
| Lhfp14       | 0.02 | 0.00 | -1.79769e | 5.84E-01 | no |
| Mylk3        | 0.02 | 0.00 | -1.79769e | 5.84E-01 | no |
| Pcdh7        | 0.01 | 0.00 | -1.79769e | 5.84E-01 | no |
| Proca1       | 0.05 | 0.00 | -1.79769e | 5.84E-01 | no |
| Rxrg         | 0.04 | 0.00 | -1.79769e | 5.84E-01 | no |
| Slc1a3       | 0.02 | 0.00 | -1.79769e | 5.84E-01 | no |
| Tas2r108     | 0.11 | 0.00 | -1.79769e | 5.84E-01 | no |
| Tesc         | 0.07 | 0.00 | -1.79769e | 5.84E-01 | no |
| Thsd7b       | 0.01 | 0.00 | -1.79769e | 5.84E-01 | no |
| Trpc1        | 0.03 | 0.00 | -1.79769e | 5.84E-01 | no |
| Tshr         | 0.02 | 0.00 | -1.79769e | 5.84E-01 | no |
| Tubal3       | 0.03 | 0.00 | -1.79769e | 5.84E-01 | no |
| Zfp105       | 0.04 | 0.00 | -1.79769e | 5.84E-01 | no |
| Zfp92        | 0.01 | 0.00 | -1.79769e | 5.84E-01 | no |
| Angptl3      | 0.03 | 0.22 | 3.05      | 5.84E-01 | no |
| Aqp9         | 0.03 | 0.18 | 2.49      | 5.84E-01 | no |
| Gm6086       | 0.02 | 0.11 | 2.48      | 5.84E-01 | no |
| Klk1         | 0.10 | 0.50 | 2.26      | 5.84E-01 | no |
| F830016B08Ri | 0.03 | 0.16 | 2.25      | 5.84E-01 | no |
| Rfpl3s       | 0.12 | 0.57 | 2.22      | 5.84E-01 | no |
| Hal          | 0.02 | 0.11 | 2.21      | 5.84E-01 | no |
| Tns4         | 0.02 | 0.08 | 2.19      | 5.84E-01 | no |
| Nlrp1c-ps    | 0.03 | 0.12 | 1.93      | 5.84E-01 | no |
| Zbtb16       | 0.02 | 0.08 | 1.90      | 5.84E-01 | no |
| Epx          | 0.04 | 0.15 | 1.87      | 5.84E-01 | no |
| Trim43b      | 0.06 | 0.20 | 1.76      | 5.84E-01 | no |
| BC051628     | 0.08 | 0.26 | 1.74      | 5.84E-01 | no |
| Il7          | 0.07 | 0.21 | 1.70      | 5.84E-01 | no |
| Angptl7      | 0.05 | 0.17 | 1.69      | 5.84E-01 | no |
| Acot4        | 0.09 | 0.23 | 1.38      | 5.84E-01 | no |
| Morn3        | 0.26 | 0.61 | 1.21      | 5.84E-01 | no |
| Fat3         | 0.02 | 0.04 | 1.18      | 5.84E-01 | no |
| 5430402O13Ri | 0.42 | 0.94 | 1.17      | 5.84E-01 | no |
| B630019K06Ri | 0.11 | 0.24 | 1.13      | 5.84E-01 | no |

|               |       |       |      |          |    |
|---------------|-------|-------|------|----------|----|
| Gsg1l         | 0.09  | 0.19  | 1.04 | 5.84E-01 | no |
| Pdgfa         | 0.34  | 0.66  | 0.95 | 5.84E-01 | no |
| F630028O10Ri  | 0.25  | 0.47  | 0.89 | 5.84E-01 | no |
| Nlrp10        | 0.15  | 0.26  | 0.82 | 5.84E-01 | no |
| Rgs9bp        | 0.11  | 0.19  | 0.76 | 5.84E-01 | no |
| Rnd3          | 0.43  | 0.71  | 0.72 | 5.84E-01 | no |
| Aldh5a1       | 0.20  | 0.32  | 0.72 | 5.84E-01 | no |
| Cds1          | 0.30  | 0.48  | 0.70 | 5.84E-01 | no |
| Cox6a2        | 1.61  | 2.58  | 0.69 | 5.84E-01 | no |
| Tmsb15b2      | 3.76  | 5.93  | 0.66 | 5.84E-01 | no |
| 2210020M01R   | 1.40  | 2.16  | 0.63 | 5.84E-01 | no |
| A630066F11Ri  | 1.50  | 2.28  | 0.60 | 5.84E-01 | no |
| Fgl2          | 0.69  | 1.04  | 0.60 | 5.84E-01 | no |
| Rab3a         | 6.19  | 9.20  | 0.57 | 5.84E-01 | no |
| Zfp14         | 1.13  | 1.66  | 0.55 | 5.84E-01 | no |
| Spata1        | 1.80  | 2.63  | 0.55 | 5.84E-01 | no |
| Hmcn1         | 0.28  | 0.40  | 0.51 | 5.84E-01 | no |
| Il18bp        | 3.59  | 5.07  | 0.50 | 5.84E-01 | no |
| Cmc1          | 10.70 | 15.01 | 0.49 | 5.84E-01 | no |
| Acy3          | 4.41  | 6.18  | 0.49 | 5.84E-01 | no |
| Zfp119a       | 3.71  | 5.18  | 0.48 | 5.84E-01 | no |
| 1700010I14Rik | 2.54  | 3.55  | 0.48 | 5.84E-01 | no |
| 1810043G02Ri  | 3.25  | 4.50  | 0.47 | 5.84E-01 | no |
| BC057022      | 2.41  | 3.32  | 0.46 | 5.84E-01 | no |
| 1110051M20R   | 3.65  | 5.00  | 0.46 | 5.84E-01 | no |
| Clcn2         | 1.99  | 2.73  | 0.46 | 5.84E-01 | no |
| Cradd         | 4.17  | 5.70  | 0.45 | 5.84E-01 | no |
| Nfia          | 1.12  | 1.53  | 0.45 | 5.84E-01 | no |
| Comtd1        | 3.13  | 4.25  | 0.44 | 5.84E-01 | no |
| Zfp3          | 4.20  | 5.70  | 0.44 | 5.84E-01 | no |
| Dsel          | 1.86  | 2.52  | 0.44 | 5.84E-01 | no |
| Zrsr1         | 2.96  | 3.99  | 0.43 | 5.84E-01 | no |
| Slc31a2       | 5.42  | 7.31  | 0.43 | 5.84E-01 | no |
| Ppap2c        | 6.09  | 8.13  | 0.42 | 5.84E-01 | no |
| 4930402H24Ri  | 2.43  | 3.22  | 0.41 | 5.84E-01 | no |
| Rnf135        | 6.51  | 8.54  | 0.39 | 5.84E-01 | no |
| Rdh12         | 8.98  | 11.74 | 0.39 | 5.84E-01 | no |
| Galnt11       | 5.60  | 7.32  | 0.39 | 5.84E-01 | no |
| Rab3d         | 3.67  | 4.78  | 0.38 | 5.84E-01 | no |
| Nkiras1       | 3.91  | 5.08  | 0.38 | 5.84E-01 | no |
| Ttc39b        | 2.36  | 3.04  | 0.36 | 5.84E-01 | no |
| Thap3         | 13.37 | 17.16 | 0.36 | 5.84E-01 | no |

|              |        |        |       |          |    |
|--------------|--------|--------|-------|----------|----|
| Rnasek       | 33.95  | 43.45  | 0.36  | 5.84E-01 | no |
| Capn2        | 5.98   | 7.62   | 0.35  | 5.84E-01 | no |
| Slc33a1      | 7.50   | 9.50   | 0.34  | 5.84E-01 | no |
| Ppfibp1      | 3.72   | 4.71   | 0.34  | 5.84E-01 | no |
| Zfp956       | 7.77   | 9.83   | 0.34  | 5.84E-01 | no |
| Zfp788       | 7.12   | 9.01   | 0.34  | 5.84E-01 | no |
| Mapkbp1      | 3.50   | 4.38   | 0.32  | 5.84E-01 | no |
| Hps4         | 7.91   | 9.89   | 0.32  | 5.84E-01 | no |
| Kctd18       | 8.40   | 10.47  | 0.32  | 5.84E-01 | no |
| 3110002H16Ri | 12.89  | 16.01  | 0.31  | 5.84E-01 | no |
| Zfp408       | 8.06   | 9.94   | 0.30  | 5.84E-01 | no |
| 1700048O20Ri | 28.47  | 35.01  | 0.30  | 5.84E-01 | no |
| Kif16b       | 5.93   | 7.27   | 0.29  | 5.84E-01 | no |
| Calcoco1     | 11.22  | 13.75  | 0.29  | 5.84E-01 | no |
| Gsdmd        | 19.15  | 23.44  | 0.29  | 5.84E-01 | no |
| Mib1         | 10.29  | 12.59  | 0.29  | 5.84E-01 | no |
| 2700089E24Ri | 16.54  | 20.21  | 0.29  | 5.84E-01 | no |
| Ngfrap1      | 33.56  | 40.83  | 0.28  | 5.84E-01 | no |
| Mrpl15       | 13.66  | 16.58  | 0.28  | 5.84E-01 | no |
| Adssl1       | 24.67  | 29.90  | 0.28  | 5.84E-01 | no |
| Ascc3        | 8.48   | 10.13  | 0.26  | 5.84E-01 | no |
| Pacs2        | 10.52  | 12.57  | 0.26  | 5.84E-01 | no |
| Cep164       | 14.19  | 16.88  | 0.25  | 5.84E-01 | no |
| Serf2        | 32.18  | 38.24  | 0.25  | 5.84E-01 | no |
| Sesn1        | 25.09  | 29.72  | 0.24  | 5.84E-01 | no |
| Rltpr        | 38.05  | 45.02  | 0.24  | 5.84E-01 | no |
| Kidins220    | 17.93  | 21.18  | 0.24  | 5.84E-01 | no |
| Itm2b        | 65.75  | 77.45  | 0.24  | 5.84E-01 | no |
| Tapt1        | 69.34  | 81.33  | 0.23  | 5.84E-01 | no |
| Hmha1        | 77.30  | 88.31  | 0.19  | 5.84E-01 | no |
| Mgat1        | 81.88  | 92.82  | 0.18  | 5.84E-01 | no |
| Myo9b        | 30.26  | 33.94  | 0.17  | 5.84E-01 | no |
| Ankrd10      | 64.51  | 57.52  | -0.17 | 5.84E-01 | no |
| Upf1         | 41.40  | 36.38  | -0.19 | 5.84E-01 | no |
| Dbnl         | 43.05  | 37.51  | -0.20 | 5.84E-01 | no |
| Gemin5       | 16.23  | 14.06  | -0.21 | 5.84E-01 | no |
| Hnrnpul2     | 49.48  | 42.34  | -0.22 | 5.84E-01 | no |
| Actr2        | 90.42  | 77.34  | -0.23 | 5.84E-01 | no |
| Dusp11       | 36.49  | 31.12  | -0.23 | 5.84E-01 | no |
| Coro1a       | 142.46 | 121.46 | -0.23 | 5.84E-01 | no |
| Prpf4b       | 44.94  | 38.30  | -0.23 | 5.84E-01 | no |
| Rmnd5a       | 34.23  | 29.15  | -0.23 | 5.84E-01 | no |

|               |        |        |       |          |    |
|---------------|--------|--------|-------|----------|----|
| Rps3          | 210.05 | 178.75 | -0.23 | 5.84E-01 | no |
| Pabpn1        | 69.71  | 59.24  | -0.23 | 5.84E-01 | no |
| Lsm14a        | 54.01  | 45.87  | -0.24 | 5.84E-01 | no |
| Tmem123       | 58.96  | 50.07  | -0.24 | 5.84E-01 | no |
| Heatr1        | 24.31  | 20.63  | -0.24 | 5.84E-01 | no |
| Cct2          | 83.55  | 70.89  | -0.24 | 5.84E-01 | no |
| Shmt2         | 43.05  | 36.52  | -0.24 | 5.84E-01 | no |
| Casc3         | 29.70  | 25.18  | -0.24 | 5.84E-01 | no |
| Polg          | 26.49  | 22.46  | -0.24 | 5.84E-01 | no |
| Taf2          | 22.30  | 18.90  | -0.24 | 5.84E-01 | no |
| lws1          | 17.35  | 14.69  | -0.24 | 5.84E-01 | no |
| 2510012J08Ril | 30.23  | 25.60  | -0.24 | 5.84E-01 | no |
| Ppp1r12a      | 27.19  | 23.02  | -0.24 | 5.84E-01 | no |
| Coro1c        | 34.72  | 29.38  | -0.24 | 5.84E-01 | no |
| Pip4k2b       | 24.15  | 20.42  | -0.24 | 5.84E-01 | no |
| Uqcrc1        | 53.34  | 45.09  | -0.24 | 5.84E-01 | no |
| Xrn2          | 36.03  | 30.45  | -0.24 | 5.84E-01 | no |
| Hdac10        | 21.82  | 18.43  | -0.24 | 5.84E-01 | no |
| Agps          | 17.60  | 14.85  | -0.25 | 5.84E-01 | no |
| Aqr           | 22.57  | 19.04  | -0.25 | 5.84E-01 | no |
| Gorasp2       | 33.20  | 28.00  | -0.25 | 5.84E-01 | no |
| Mbd3          | 46.70  | 39.36  | -0.25 | 5.84E-01 | no |
| Klhdc10       | 15.76  | 13.28  | -0.25 | 5.84E-01 | no |
| Arpc5l        | 73.81  | 62.11  | -0.25 | 5.84E-01 | no |
| Aldh9a1       | 27.37  | 23.02  | -0.25 | 5.84E-01 | no |
| Sec23ip       | 18.86  | 15.85  | -0.25 | 5.84E-01 | no |
| Tmsb10        | 101.95 | 85.69  | -0.25 | 5.84E-01 | no |
| Mdm2          | 28.37  | 23.84  | -0.25 | 5.84E-01 | no |
| Ranbp9        | 27.86  | 23.39  | -0.25 | 5.84E-01 | no |
| Bop1          | 30.26  | 25.40  | -0.25 | 5.84E-01 | no |
| Eif2b5        | 27.82  | 23.34  | -0.25 | 5.84E-01 | no |
| Usp12         | 19.85  | 16.65  | -0.25 | 5.84E-01 | no |
| Tsr1          | 22.44  | 18.79  | -0.26 | 5.84E-01 | no |
| Rfwd2         | 15.80  | 13.23  | -0.26 | 5.84E-01 | no |
| Pcnp          | 39.68  | 33.20  | -0.26 | 5.84E-01 | no |
| Rbm28         | 17.92  | 14.98  | -0.26 | 5.84E-01 | no |
| Psm5          | 58.19  | 48.64  | -0.26 | 5.84E-01 | no |
| Rab8a         | 39.07  | 32.66  | -0.26 | 5.84E-01 | no |
| Dnajc8        | 47.20  | 39.44  | -0.26 | 5.84E-01 | no |
| Iqgap3        | 11.43  | 9.53   | -0.26 | 5.84E-01 | no |
| Sdhd          | 58.61  | 48.85  | -0.26 | 5.84E-01 | no |
| Ddx47         | 37.56  | 31.26  | -0.26 | 5.84E-01 | no |

|              |        |        |       |          |    |
|--------------|--------|--------|-------|----------|----|
| Psma1        | 50.73  | 42.16  | -0.27 | 5.84E-01 | no |
| Tfam         | 16.16  | 13.41  | -0.27 | 5.84E-01 | no |
| Ddx5         | 325.20 | 269.49 | -0.27 | 5.84E-01 | no |
| Yars         | 19.85  | 16.44  | -0.27 | 5.84E-01 | no |
| Cisd2        | 22.30  | 18.46  | -0.27 | 5.84E-01 | no |
| Tmx1         | 30.79  | 25.47  | -0.27 | 5.84E-01 | no |
| Nol7         | 35.22  | 29.10  | -0.28 | 5.84E-01 | no |
| 2810008M24R  | 36.30  | 29.99  | -0.28 | 5.84E-01 | no |
| Atp5o        | 72.22  | 59.65  | -0.28 | 5.84E-01 | no |
| Rpl5         | 56.10  | 46.32  | -0.28 | 5.84E-01 | no |
| Adsl         | 25.46  | 21.02  | -0.28 | 5.84E-01 | no |
| Exoc6        | 19.44  | 15.99  | -0.28 | 5.84E-01 | no |
| Heatr3       | 16.75  | 13.76  | -0.28 | 5.84E-01 | no |
| Mrpl12       | 46.44  | 38.14  | -0.28 | 5.84E-01 | no |
| Tubgcp4      | 18.34  | 15.04  | -0.29 | 5.84E-01 | no |
| Fam126b      | 7.31   | 5.99   | -0.29 | 5.84E-01 | no |
| Slmo2        | 32.87  | 26.90  | -0.29 | 5.84E-01 | no |
| Ptch1        | 10.20  | 8.35   | -0.29 | 5.84E-01 | no |
| Gapdh        | 37.20  | 30.42  | -0.29 | 5.84E-01 | no |
| Rpl39        | 131.26 | 107.22 | -0.29 | 5.84E-01 | no |
| Isca1        | 26.33  | 21.46  | -0.29 | 5.84E-01 | no |
| Polr3k       | 18.36  | 14.93  | -0.30 | 5.84E-01 | no |
| Rpl27a       | 36.11  | 29.36  | -0.30 | 5.84E-01 | no |
| Mapk8        | 8.95   | 7.26   | -0.30 | 5.84E-01 | no |
| Crip1        | 88.42  | 71.69  | -0.30 | 5.84E-01 | no |
| Ccdc111      | 11.10  | 8.97   | -0.31 | 5.84E-01 | no |
| Mrpl50       | 19.62  | 15.80  | -0.31 | 5.84E-01 | no |
| Nop10        | 60.93  | 48.89  | -0.32 | 5.84E-01 | no |
| Rad17        | 13.60  | 10.90  | -0.32 | 5.84E-01 | no |
| Sra1         | 24.36  | 19.47  | -0.32 | 5.84E-01 | no |
| E130303B06Ri | 23.87  | 19.08  | -0.32 | 5.84E-01 | no |
| Arf2         | 12.18  | 9.73   | -0.32 | 5.84E-01 | no |
| Mrpl38       | 19.41  | 15.46  | -0.33 | 5.84E-01 | no |
| Zcchc17      | 21.36  | 17.00  | -0.33 | 5.84E-01 | no |
| Haus2        | 13.15  | 10.44  | -0.33 | 5.84E-01 | no |
| Nsun5        | 13.19  | 10.46  | -0.33 | 5.84E-01 | no |
| 1110059E24Ri | 21.87  | 17.33  | -0.34 | 5.84E-01 | no |
| Gatc         | 17.24  | 13.64  | -0.34 | 5.84E-01 | no |
| Cwf19l1      | 8.63   | 6.82   | -0.34 | 5.84E-01 | no |
| Slc35b1      | 25.80  | 20.38  | -0.34 | 5.84E-01 | no |
| 1810026B05Ri | 7.30   | 5.76   | -0.34 | 5.84E-01 | no |
| Mrp63        | 13.65  | 10.75  | -0.34 | 5.84E-01 | no |

|              |       |       |       |          |    |
|--------------|-------|-------|-------|----------|----|
| Haus8        | 12.01 | 9.43  | -0.35 | 5.84E-01 | no |
| Mrpl16       | 24.35 | 19.08 | -0.35 | 5.84E-01 | no |
| Sepsecs      | 12.70 | 9.94  | -0.35 | 5.84E-01 | no |
| Tada3        | 11.64 | 9.08  | -0.36 | 5.84E-01 | no |
| 5530601H04Ri | 7.09  | 5.53  | -0.36 | 5.84E-01 | no |
| Mybpc2       | 6.09  | 4.74  | -0.36 | 5.84E-01 | no |
| Cisd1        | 24.73 | 19.20 | -0.36 | 5.84E-01 | no |
| Nrarp        | 8.63  | 6.68  | -0.37 | 5.84E-01 | no |
| Mrps31       | 12.14 | 9.35  | -0.38 | 5.84E-01 | no |
| Thap1        | 8.87  | 6.82  | -0.38 | 5.84E-01 | no |
| Snrnp25      | 18.80 | 14.33 | -0.39 | 5.84E-01 | no |
| Tmem101      | 10.43 | 7.94  | -0.39 | 5.84E-01 | no |
| Ccdc138      | 6.81  | 5.17  | -0.40 | 5.84E-01 | no |
| 2610301B20Ri | 8.33  | 6.30  | -0.40 | 5.84E-01 | no |
| Alg3         | 12.15 | 9.17  | -0.41 | 5.84E-01 | no |
| Obfc1        | 7.07  | 5.32  | -0.41 | 5.84E-01 | no |
| Bola3        | 19.65 | 14.59 | -0.43 | 5.84E-01 | no |
| Cav2         | 7.85  | 5.82  | -0.43 | 5.84E-01 | no |
| Pacrgl       | 9.10  | 6.74  | -0.43 | 5.84E-01 | no |
| Gadd45a      | 8.11  | 5.98  | -0.44 | 5.84E-01 | no |
| Jup          | 3.44  | 2.53  | -0.44 | 5.84E-01 | no |
| Apoe         | 6.90  | 5.06  | -0.45 | 5.84E-01 | no |
| 0610009B22Ri | 15.23 | 11.14 | -0.45 | 5.84E-01 | no |
| 0610011F06Ri | 11.53 | 8.41  | -0.45 | 5.84E-01 | no |
| Tbc1d7       | 8.01  | 5.77  | -0.47 | 5.84E-01 | no |
| Pex10        | 4.46  | 3.21  | -0.47 | 5.84E-01 | no |
| Ptms         | 6.08  | 4.34  | -0.49 | 5.84E-01 | no |
| Srd5a1       | 2.36  | 1.66  | -0.50 | 5.84E-01 | no |
| Tmem132a     | 1.58  | 1.11  | -0.51 | 5.84E-01 | no |
| Pde4c        | 1.72  | 1.21  | -0.51 | 5.84E-01 | no |
| Olfml2b      | 1.52  | 1.05  | -0.52 | 5.84E-01 | no |
| Phlda3       | 2.90  | 2.00  | -0.53 | 5.84E-01 | no |
| Slc1a4       | 1.08  | 0.74  | -0.55 | 5.84E-01 | no |
| Sorbs2       | 0.43  | 0.28  | -0.61 | 5.84E-01 | no |
| Bex6         | 2.88  | 1.87  | -0.62 | 5.84E-01 | no |
| Rnf125       | 1.55  | 0.97  | -0.66 | 5.84E-01 | no |
| Clic6        | 0.58  | 0.36  | -0.67 | 5.84E-01 | no |
| Vcam1        | 0.61  | 0.38  | -0.70 | 5.84E-01 | no |
| Wipi1        | 0.84  | 0.50  | -0.74 | 5.84E-01 | no |
| Nr4a2        | 0.76  | 0.45  | -0.74 | 5.84E-01 | no |
| Gpr183       | 0.33  | 0.18  | -0.89 | 5.84E-01 | no |
| Ccdc150      | 0.22  | 0.12  | -0.91 | 5.84E-01 | no |

|              |       |       |       |          |    |
|--------------|-------|-------|-------|----------|----|
| Stox2        | 0.11  | 0.06  | -0.92 | 5.84E-01 | no |
| Prr19        | 0.48  | 0.24  | -1.03 | 5.84E-01 | no |
| Rasgrf2      | 0.08  | 0.04  | -1.16 | 5.84E-01 | no |
| Rhbdf1       | 0.17  | 0.07  | -1.18 | 5.84E-01 | no |
| Ucp3         | 0.23  | 0.10  | -1.19 | 5.84E-01 | no |
| Cubn         | 0.05  | 0.02  | -1.22 | 5.84E-01 | no |
| Cybrd1       | 0.12  | 0.05  | -1.23 | 5.84E-01 | no |
| Lrrn4cl      | 0.21  | 0.09  | -1.31 | 5.84E-01 | no |
| Gm11275,Hist | 1.17  | 0.46  | -1.35 | 5.84E-01 | no |
| St8sia2      | 0.09  | 0.03  | -1.40 | 5.84E-01 | no |
| Kcnj9        | 0.13  | 0.05  | -1.41 | 5.84E-01 | no |
| Rhpn2        | 0.14  | 0.05  | -1.42 | 5.84E-01 | no |
| Icam5        | 0.10  | 0.02  | -1.96 | 5.84E-01 | no |
| Slc34a1      | 0.10  | 0.02  | -2.02 | 5.84E-01 | no |
| As3mt        | 8.95  | 11.50 | 0.36  | 5.85E-01 | no |
| Gtf2h1       | 20.41 | 24.42 | 0.26  | 5.85E-01 | no |
| Grwd1        | 18.26 | 14.85 | -0.30 | 5.85E-01 | no |
| Slc25a29     | 1.71  | 1.16  | -0.55 | 5.85E-01 | no |
| Rhoh         | 19.63 | 16.58 | -0.24 | 5.85E-01 | no |
| Scai         | 6.65  | 7.96  | 0.26  | 5.85E-01 | no |
| Dus2l        | 6.02  | 7.92  | 0.40  | 5.85E-01 | no |
| Tmed5        | 24.14 | 20.28 | -0.25 | 5.85E-01 | no |
| Lmbr1l       | 18.56 | 15.12 | -0.30 | 5.85E-01 | no |
| Klhl26       | 7.80  | 9.66  | 0.31  | 5.85E-01 | no |
| 4930441O14Ri | 0.35  | 0.19  | -0.84 | 5.85E-01 | no |
| Specc1       | 0.43  | 0.63  | 0.56  | 5.86E-01 | no |
| BC024479     | 13.33 | 10.64 | -0.32 | 5.86E-01 | no |
| Nfkbid       | 8.38  | 10.70 | 0.35  | 5.86E-01 | no |
| Surf2        | 12.78 | 16.45 | 0.36  | 5.86E-01 | no |
| Esrra        | 10.78 | 13.37 | 0.31  | 5.86E-01 | no |
| Wbp5         | 36.02 | 44.06 | 0.29  | 5.86E-01 | no |
| Nfkbia       | 35.95 | 29.93 | -0.26 | 5.86E-01 | no |
| Rab33b       | 8.81  | 6.97  | -0.34 | 5.86E-01 | no |
| Aldh4a1      | 4.11  | 3.12  | -0.40 | 5.86E-01 | no |
| Greb1l       | 0.05  | 0.01  | -1.79 | 5.86E-01 | no |
| Tusc3        | 14.35 | 11.13 | -0.37 | 5.87E-01 | no |
| 5033406O09Ri | 1.98  | 2.85  | 0.52  | 5.88E-01 | no |
| Edem2        | 12.93 | 15.91 | 0.30  | 5.88E-01 | no |
| Lekr1        | 2.72  | 1.92  | -0.50 | 5.88E-01 | no |
| Ptafr        | 0.12  | 0.30  | 1.31  | 5.88E-01 | no |
| Btnl2        | 0.46  | 0.74  | 0.67  | 5.88E-01 | no |
| Psmb7        | 59.82 | 49.71 | -0.27 | 5.88E-01 | no |

|          |       |       |       |          |    |
|----------|-------|-------|-------|----------|----|
| Nupr1    | 0.57  | 0.17  | -1.78 | 5.89E-01 | no |
| Mrpl37   | 32.14 | 26.57 | -0.27 | 5.89E-01 | no |
| Parva    | 0.08  | 0.02  | -1.78 | 5.89E-01 | no |
| Unc45a   | 14.96 | 17.87 | 0.26  | 5.89E-01 | no |
| Cct4     | 72.34 | 61.74 | -0.23 | 5.89E-01 | no |
| Pik3ca   | 17.44 | 14.87 | -0.23 | 5.89E-01 | no |
| Zfp574   | 13.47 | 11.34 | -0.25 | 5.89E-01 | no |
| Mrps18b  | 26.71 | 21.29 | -0.33 | 5.89E-01 | no |
| Bcorl1   | 2.36  | 3.03  | 0.36  | 5.89E-01 | no |
| Sec22a   | 3.27  | 4.31  | 0.40  | 5.89E-01 | no |
| Lin7c    | 31.40 | 26.64 | -0.24 | 5.89E-01 | no |
| Cwc25    | 12.50 | 10.22 | -0.29 | 5.89E-01 | no |
| Camkv    | 2.35  | 1.70  | -0.47 | 5.89E-01 | no |
| Reep6    | 0.42  | 0.24  | -0.81 | 5.89E-01 | no |
| Ybey     | 2.23  | 1.64  | -0.44 | 5.89E-01 | no |
| Pomgnt1  | 7.27  | 9.11  | 0.32  | 5.89E-01 | no |
| Psm14    | 38.08 | 31.64 | -0.27 | 5.90E-01 | no |
| Dcaf4    | 6.85  | 8.75  | 0.35  | 5.90E-01 | no |
| Lamb2    | 1.01  | 0.71  | -0.50 | 5.90E-01 | no |
| Zfp456   | 4.12  | 5.35  | 0.38  | 5.90E-01 | no |
| Tle4     | 22.48 | 19.06 | -0.24 | 5.90E-01 | no |
| Csrnp2   | 2.76  | 2.06  | -0.42 | 5.90E-01 | no |
| Cnih2    | 0.98  | 0.60  | -0.72 | 5.90E-01 | no |
| Rnf126   | 34.61 | 29.14 | -0.25 | 5.90E-01 | no |
| Gm13718  | 0.27  | 0.15  | -0.82 | 5.90E-01 | no |
| Nup153   | 34.89 | 29.89 | -0.22 | 5.90E-01 | no |
| Ppp1r8   | 28.88 | 24.12 | -0.26 | 5.91E-01 | no |
| Wdr53    | 11.22 | 8.61  | -0.38 | 5.91E-01 | no |
| Ccdc123  | 16.24 | 13.37 | -0.28 | 5.91E-01 | no |
| Tmcc2    | 0.94  | 1.34  | 0.52  | 5.91E-01 | no |
| Hars     | 28.64 | 23.89 | -0.26 | 5.91E-01 | no |
| Ctsb     | 18.10 | 21.35 | 0.24  | 5.91E-01 | no |
| Map3k7   | 20.82 | 18.01 | -0.21 | 5.91E-01 | no |
| Sf3b2    | 68.22 | 58.52 | -0.22 | 5.91E-01 | no |
| Eif4g1   | 72.39 | 61.85 | -0.23 | 5.91E-01 | no |
| Hist1h4h | 0.87  | 0.28  | -1.63 | 5.91E-01 | no |
| Dmrta2   | 0.16  | 0.29  | 0.86  | 5.91E-01 | no |
| Zmynd11  | 30.18 | 34.78 | 0.20  | 5.92E-01 | no |
| Dcdc2a   | 0.01  | 0.07  | 2.57  | 5.92E-01 | no |
| Zbtb37   | 4.83  | 6.15  | 0.35  | 5.92E-01 | no |
| Luc7l3   | 47.95 | 40.96 | -0.23 | 5.92E-01 | no |
| Rsl1d1   | 47.45 | 40.17 | -0.24 | 5.92E-01 | no |



|              |       |       |       |          |    |
|--------------|-------|-------|-------|----------|----|
| Idh3a        | 27.21 | 22.73 | -0.26 | 5.92E-01 | no |
| Lsm12        | 29.56 | 23.93 | -0.30 | 5.92E-01 | no |
| Thoc2        | 27.09 | 23.19 | -0.22 | 5.92E-01 | no |
| Safb         | 45.58 | 39.02 | -0.22 | 5.93E-01 | no |
| Ndufv3       | 35.26 | 28.26 | -0.32 | 5.93E-01 | no |
| Kif5b        | 36.15 | 30.99 | -0.22 | 5.93E-01 | no |
| Cd52         | 48.03 | 37.74 | -0.35 | 5.93E-01 | no |
| 9530082P21Ri | 6.47  | 5.05  | -0.36 | 5.93E-01 | no |
| Nfatc3       | 46.17 | 53.92 | 0.22  | 5.93E-01 | no |
| 9-Sep        | 34.15 | 38.54 | 0.17  | 5.93E-01 | no |
| Celf1        | 44.53 | 38.41 | -0.21 | 5.93E-01 | no |
| Plek         | 12.44 | 10.25 | -0.28 | 5.94E-01 | no |
| Cdc123       | 26.54 | 21.75 | -0.29 | 5.94E-01 | no |
| Cnot6l       | 56.71 | 48.99 | -0.21 | 5.95E-01 | no |
| Tmem14c      | 45.35 | 37.22 | -0.28 | 5.95E-01 | no |
| Bcl2l12      | 26.67 | 21.40 | -0.32 | 5.95E-01 | no |
| Tsga10       | 1.92  | 1.38  | -0.48 | 5.95E-01 | no |
| Atr          | 14.14 | 12.02 | -0.23 | 5.95E-01 | no |
| Fbl          | 61.62 | 52.01 | -0.24 | 5.95E-01 | no |
| Stx7         | 17.12 | 13.99 | -0.29 | 5.95E-01 | no |
| 4930515G16Ri | 0.86  | 0.08  | -3.42 | 5.95E-01 | no |
| Ptprv        | 1.39  | 1.85  | 0.42  | 5.95E-01 | no |
| Mkrn2        | 9.93  | 7.80  | -0.35 | 5.95E-01 | no |
| Zfp507       | 10.25 | 12.13 | 0.24  | 5.95E-01 | no |
| Axin2        | 1.52  | 1.09  | -0.47 | 5.95E-01 | no |
| Trmt112      | 72.99 | 62.44 | -0.23 | 5.96E-01 | no |
| Nedd1        | 16.68 | 13.84 | -0.27 | 5.96E-01 | no |
| Atf1         | 43.68 | 37.07 | -0.24 | 5.96E-01 | no |
| Rps6ka4      | 7.06  | 8.79  | 0.32  | 5.96E-01 | no |
| Sec13        | 42.12 | 35.11 | -0.26 | 5.96E-01 | no |
| Exosc7       | 23.41 | 18.60 | -0.33 | 5.96E-01 | no |
| Fzd4         | 0.19  | 0.09  | -1.10 | 5.96E-01 | no |
| Gars         | 37.38 | 31.73 | -0.24 | 5.96E-01 | no |
| Cbll1        | 25.90 | 21.31 | -0.28 | 5.96E-01 | no |
| Cox6b1       | 72.00 | 58.49 | -0.30 | 5.97E-01 | no |
| Pom121l2     | 0.09  | 0.02  | -1.99 | 5.97E-01 | no |
| Zkscan14     | 5.36  | 7.02  | 0.39  | 5.97E-01 | no |
| Rsph3a       | 8.08  | 10.28 | 0.35  | 5.97E-01 | no |
| Snx30        | 28.54 | 33.27 | 0.22  | 5.97E-01 | no |
| Fbxo10       | 1.28  | 1.75  | 0.45  | 5.97E-01 | no |
| Gpatch4      | 18.71 | 15.31 | -0.29 | 5.97E-01 | no |
| Fads6        | 0.13  | 0.37  | 1.48  | 5.97E-01 | no |

|              |        |        |           |          |    |
|--------------|--------|--------|-----------|----------|----|
| Lctl         | 0.00   | 0.02   | 1.79769e+ | 5.97E-01 | no |
| Zfp467       | 0.92   | 1.37   | 0.58      | 5.97E-01 | no |
| Ysk4         | 0.48   | 0.71   | 0.57      | 5.97E-01 | no |
| Atf2         | 24.52  | 21.14  | -0.21     | 5.97E-01 | no |
| 2410002O22Ri | 21.51  | 18.44  | -0.22     | 5.97E-01 | no |
| Gusb         | 24.66  | 20.63  | -0.26     | 5.97E-01 | no |
| Nudt12       | 0.62   | 0.97   | 0.64      | 5.98E-01 | no |
| Myo9a        | 3.93   | 4.74   | 0.27      | 5.98E-01 | no |
| Rpl8         | 358.28 | 307.68 | -0.22     | 5.98E-01 | no |
| Impa1        | 30.72  | 25.86  | -0.25     | 5.98E-01 | no |
| Acat2        | 19.01  | 15.54  | -0.29     | 5.98E-01 | no |
| Ints12       | 10.85  | 8.67   | -0.32     | 5.98E-01 | no |
| Tmem11       | 18.98  | 15.15  | -0.33     | 5.98E-01 | no |
| Vmn2r-ps14   | 3.96   | 3.01   | -0.40     | 5.98E-01 | no |
| Tnni2        | 1.25   | 2.00   | 0.68      | 5.98E-01 | no |
| Rps16        | 439.10 | 377.16 | -0.22     | 5.98E-01 | no |
| Cd209a       | 0.14   | 0.35   | 1.37      | 5.98E-01 | no |
| Pcgf1        | 5.44   | 7.55   | 0.47      | 5.98E-01 | no |
| Hadh         | 22.25  | 26.95  | 0.28      | 5.98E-01 | no |
| Eif4a2       | 107.94 | 94.03  | -0.20     | 5.98E-01 | no |
| Smu1         | 25.94  | 21.91  | -0.24     | 5.98E-01 | no |
| Atg9b        | 0.72   | 0.49   | -0.57     | 5.98E-01 | no |
| Zfp740       | 30.13  | 25.68  | -0.23     | 5.98E-01 | no |
| Pptc7        | 15.05  | 12.62  | -0.25     | 5.98E-01 | no |
| Rdbp         | 22.70  | 18.83  | -0.27     | 5.98E-01 | no |
| Il1b         | 0.21   | 0.43   | 1.03      | 5.98E-01 | no |
| Abcf1        | 40.81  | 34.97  | -0.22     | 5.98E-01 | no |
| Stard7       | 44.92  | 38.44  | -0.22     | 5.98E-01 | no |
| Tmed1        | 11.65  | 9.03   | -0.37     | 5.98E-01 | no |
| Gnrh1        | 3.67   | 2.38   | -0.62     | 5.98E-01 | no |
| Nsmce4a      | 39.80  | 33.24  | -0.26     | 5.99E-01 | no |
| Rock1        | 29.34  | 25.15  | -0.22     | 5.99E-01 | no |
| Cobra1       | 35.72  | 30.40  | -0.23     | 5.99E-01 | no |
| Kcne1        | 0.13   | 0.02   | -2.45     | 5.99E-01 | no |
| Ddx20        | 20.66  | 17.20  | -0.27     | 6.00E-01 | no |
| Pprc1        | 19.39  | 16.54  | -0.23     | 6.00E-01 | no |
| Atmin        | 12.27  | 14.56  | 0.25      | 6.00E-01 | no |
| BC032203     | 12.61  | 10.67  | -0.24     | 6.00E-01 | no |
| Smndc1       | 33.65  | 28.21  | -0.25     | 6.01E-01 | no |
| Setd2        | 31.63  | 27.17  | -0.22     | 6.01E-01 | no |
| Acsf3        | 11.41  | 9.11   | -0.32     | 6.01E-01 | no |
| Angptl1      | 0.28   | 0.13   | -1.11     | 6.01E-01 | no |

|              |        |       |       |          |    |
|--------------|--------|-------|-------|----------|----|
| Trpm2        | 0.10   | 0.16  | 0.73  | 6.01E-01 | no |
| Rab6         | 23.99  | 20.34 | -0.24 | 6.02E-01 | no |
| Rrp15        | 18.03  | 14.31 | -0.33 | 6.02E-01 | no |
| Uqcrc2       | 48.88  | 41.48 | -0.24 | 6.02E-01 | no |
| Mrs2         | 21.13  | 17.38 | -0.28 | 6.02E-01 | no |
| Arrdc3       | 9.90   | 8.01  | -0.30 | 6.02E-01 | no |
| Sdc3         | 0.58   | 0.40  | -0.56 | 6.02E-01 | no |
| Psmb3        | 57.74  | 47.52 | -0.28 | 6.02E-01 | no |
| Cnst         | 16.60  | 14.03 | -0.24 | 6.03E-01 | no |
| Phgdh        | 7.92   | 10.09 | 0.35  | 6.03E-01 | no |
| St8sia1      | 0.02   | 0.06  | 1.47  | 6.03E-01 | no |
| Fuz          | 6.92   | 9.01  | 0.38  | 6.03E-01 | no |
| A630072M18F  | 4.26   | 5.34  | 0.33  | 6.03E-01 | no |
| Hist1h2ab    | 0.86   | 0.34  | -1.33 | 6.03E-01 | no |
| Dennd1b      | 11.99  | 13.80 | 0.20  | 6.03E-01 | no |
| D17Wsu92e    | 35.34  | 30.74 | -0.20 | 6.04E-01 | no |
| Cox5b        | 109.51 | 92.17 | -0.25 | 6.04E-01 | no |
| Ube2w        | 15.95  | 12.77 | -0.32 | 6.04E-01 | no |
| Irf2         | 40.74  | 34.71 | -0.23 | 6.04E-01 | no |
| Rtf1         | 25.03  | 21.39 | -0.23 | 6.04E-01 | no |
| Prex1        | 22.99  | 19.73 | -0.22 | 6.04E-01 | no |
| Aagab        | 20.09  | 16.74 | -0.26 | 6.04E-01 | no |
| Nbn          | 12.94  | 10.48 | -0.30 | 6.04E-01 | no |
| Fam105b      | 15.73  | 19.45 | 0.31  | 6.04E-01 | no |
| Vmac         | 4.85   | 6.38  | 0.39  | 6.04E-01 | no |
| Parp12       | 5.01   | 6.44  | 0.36  | 6.04E-01 | no |
| Rnf139       | 13.87  | 11.52 | -0.27 | 6.05E-01 | no |
| Mtmr4        | 19.92  | 17.01 | -0.23 | 6.05E-01 | no |
| Adam17       | 21.06  | 17.89 | -0.24 | 6.05E-01 | no |
| Armc6        | 7.49   | 5.80  | -0.37 | 6.05E-01 | no |
| Zfp942       | 9.54   | 11.78 | 0.30  | 6.05E-01 | no |
| Acaa2        | 16.67  | 20.57 | 0.30  | 6.05E-01 | no |
| Ap1g2        | 19.32  | 22.96 | 0.25  | 6.05E-01 | no |
| X99384       | 0.15   | 0.08  | -0.99 | 6.05E-01 | no |
| Gm16379      | 89.48  | 74.21 | -0.27 | 6.05E-01 | no |
| 6820408C15Ri | 0.16   | 0.33  | 1.04  | 6.06E-01 | no |
| Wipi2        | 23.30  | 19.82 | -0.23 | 6.07E-01 | no |
| Yap1         | 0.15   | 0.27  | 0.85  | 6.07E-01 | no |
| Toe1         | 16.98  | 13.83 | -0.30 | 6.07E-01 | no |
| Capzb        | 101.83 | 88.23 | -0.21 | 6.07E-01 | no |
| Letm1        | 19.64  | 16.60 | -0.24 | 6.07E-01 | no |
| Tsc22d1      | 16.75  | 13.54 | -0.31 | 6.07E-01 | no |

|           |       |       |       |          |    |
|-----------|-------|-------|-------|----------|----|
| Baz1a     | 34.60 | 29.77 | -0.22 | 6.08E-01 | no |
| Apoa2     | 0.72  | 0.13  | -2.42 | 6.08E-01 | no |
| Hist1h2bb | 1.55  | 0.82  | -0.92 | 6.08E-01 | no |
| Mrpl45    | 14.79 | 12.07 | -0.29 | 6.08E-01 | no |
| Zfp108    | 0.19  | 0.34  | 0.81  | 6.09E-01 | no |
| Taok2     | 39.23 | 35.02 | -0.16 | 6.09E-01 | no |
| Al314180  | 35.81 | 30.81 | -0.22 | 6.09E-01 | no |
| Ddx46     | 36.49 | 31.40 | -0.22 | 6.09E-01 | no |
| Gps1      | 39.11 | 33.53 | -0.22 | 6.09E-01 | no |
| Eif2a     | 35.18 | 29.77 | -0.24 | 6.09E-01 | no |
| Mrpl3     | 27.04 | 22.23 | -0.28 | 6.09E-01 | no |
| Leo1      | 14.34 | 11.73 | -0.29 | 6.09E-01 | no |
| Tram2     | 9.13  | 6.98  | -0.39 | 6.09E-01 | no |
| Gm12034   | 23.08 | 17.33 | -0.41 | 6.09E-01 | no |
| Nab1      | 9.83  | 11.77 | 0.26  | 6.09E-01 | no |
| Col5a1    | 0.04  | 0.01  | -2.41 | 6.09E-01 | no |
| Aldh1b1   | 13.42 | 16.31 | 0.28  | 6.09E-01 | no |
| Tprgl     | 36.13 | 42.69 | 0.24  | 6.09E-01 | no |
| Rai1      | 34.24 | 30.16 | -0.18 | 6.09E-01 | no |
| Atp8b3    | 0.03  | 0.08  | 1.62  | 6.09E-01 | no |
| Lst1      | 1.39  | 2.43  | 0.81  | 6.09E-01 | no |
| Rere      | 51.30 | 43.98 | -0.22 | 6.10E-01 | no |
| Psmc3     | 47.27 | 40.22 | -0.23 | 6.10E-01 | no |
| Fsip1     | 1.31  | 0.87  | -0.59 | 6.10E-01 | no |
| Zscan18   | 0.62  | 0.91  | 0.55  | 6.10E-01 | no |
| Itgb1bp2  | 1.12  | 0.70  | -0.66 | 6.10E-01 | no |
| Tmub1     | 7.03  | 9.26  | 0.40  | 6.10E-01 | no |
| Hnrnpl    | 96.76 | 83.30 | -0.22 | 6.10E-01 | no |
| Nt5dc1    | 8.22  | 10.35 | 0.33  | 6.10E-01 | no |
| Btf3l4    | 14.28 | 11.66 | -0.29 | 6.10E-01 | no |
| Arrdc4    | 0.16  | 0.40  | 1.30  | 6.10E-01 | no |
| Trip6     | 8.32  | 10.60 | 0.35  | 6.11E-01 | no |
| Slc25a12  | 11.73 | 14.27 | 0.28  | 6.11E-01 | no |
| Tmco1     | 8.97  | 7.34  | -0.29 | 6.11E-01 | no |
| Papolb    | 1.47  | 1.01  | -0.54 | 6.11E-01 | no |
| Smpd3     | 0.25  | 0.15  | -0.72 | 6.11E-01 | no |
| Gm10790   | 0.23  | 0.04  | -2.41 | 6.11E-01 | no |
| Ccdc124   | 32.79 | 26.71 | -0.30 | 6.11E-01 | no |
| Taf4a     | 17.83 | 15.14 | -0.24 | 6.11E-01 | no |
| Ankrd49   | 18.12 | 14.56 | -0.31 | 6.12E-01 | no |
| Foxn2     | 15.15 | 12.78 | -0.25 | 6.12E-01 | no |
| Rasl12    | 0.08  | 0.19  | 1.26  | 6.12E-01 | no |

|              |        |        |       |          |    |
|--------------|--------|--------|-------|----------|----|
| Ppp1r12b     | 3.35   | 2.53   | -0.40 | 6.12E-01 | no |
| Prkab2       | 4.17   | 5.30   | 0.35  | 6.13E-01 | no |
| Traf6        | 24.04  | 20.55  | -0.23 | 6.13E-01 | no |
| Alg9         | 7.02   | 8.89   | 0.34  | 6.13E-01 | no |
| Mocos        | 0.08   | 0.19   | 1.18  | 6.13E-01 | no |
| Ptpn9        | 7.20   | 8.83   | 0.29  | 6.13E-01 | no |
| Rps21        | 138.36 | 115.47 | -0.26 | 6.13E-01 | no |
| Cenpo        | 11.77  | 9.81   | -0.26 | 6.13E-01 | no |
| Stim2        | 7.68   | 6.27   | -0.29 | 6.13E-01 | no |
| Med30        | 28.36  | 22.58  | -0.33 | 6.13E-01 | no |
| Acad8        | 5.16   | 6.64   | 0.36  | 6.13E-01 | no |
| Scamp5       | 0.12   | 0.05   | -1.38 | 6.14E-01 | no |
| Gm684        | 9.18   | 6.93   | -0.41 | 6.14E-01 | no |
| Dstn         | 22.23  | 18.21  | -0.29 | 6.15E-01 | no |
| Pura         | 10.08  | 12.71  | 0.33  | 6.15E-01 | no |
| Ankmy1       | 0.10   | 0.20   | 0.97  | 6.15E-01 | no |
| Gsk3a        | 39.99  | 34.17  | -0.23 | 6.15E-01 | no |
| Dnrtip2      | 26.87  | 22.68  | -0.24 | 6.15E-01 | no |
| Slc11a2      | 22.82  | 19.75  | -0.21 | 6.16E-01 | no |
| Slc2a10      | 0.05   | 0.14   | 1.44  | 6.16E-01 | no |
| Vps18        | 11.41  | 13.59  | 0.25  | 6.16E-01 | no |
| Syt11        | 0.68   | 0.46   | -0.55 | 6.16E-01 | no |
| Whsc1l1      | 31.73  | 28.09  | -0.18 | 6.16E-01 | no |
| Clns1a       | 39.68  | 33.30  | -0.25 | 6.16E-01 | no |
| Tnrc18       | 28.57  | 25.20  | -0.18 | 6.16E-01 | no |
| Gm4951       | 0.08   | 0.20   | 1.33  | 6.16E-01 | no |
| Fam71f2      | 0.32   | 0.59   | 0.91  | 6.16E-01 | no |
| Dera         | 27.53  | 22.85  | -0.27 | 6.16E-01 | no |
| Tmem129      | 17.66  | 14.51  | -0.28 | 6.16E-01 | no |
| Slc22a3      | 0.02   | 0.12   | 2.36  | 6.17E-01 | no |
| Tubb6        | 0.86   | 1.29   | 0.58  | 6.17E-01 | no |
| AU041133     | 3.02   | 4.06   | 0.43  | 6.17E-01 | no |
| BC030336     | 9.68   | 7.95   | -0.28 | 6.17E-01 | no |
| 9330020H09Ri | 1.80   | 1.30   | -0.47 | 6.17E-01 | no |
| Vezf1        | 32.41  | 27.84  | -0.22 | 6.17E-01 | no |
| Nxph4        | 0.22   | 0.04   | -2.37 | 6.17E-01 | no |
| Men1         | 38.91  | 34.42  | -0.18 | 6.18E-01 | no |
| Acvr2b       | 1.69   | 2.40   | 0.50  | 6.18E-01 | no |
| Sp1          | 41.18  | 35.51  | -0.21 | 6.18E-01 | no |
| Rpn1         | 31.25  | 26.81  | -0.22 | 6.18E-01 | no |
| Tmprss9      | 0.12   | 0.05   | -1.31 | 6.18E-01 | no |
| Pir          | 0.12   | 0.30   | 1.36  | 6.19E-01 | no |

|              |        |        |       |          |    |
|--------------|--------|--------|-------|----------|----|
| Rpl12        | 284.74 | 245.69 | -0.21 | 6.19E-01 | no |
| Copb2        | 39.43  | 33.81  | -0.22 | 6.19E-01 | no |
| Smarca5      | 16.61  | 14.07  | -0.24 | 6.19E-01 | no |
| Lpcat1       | 14.25  | 17.66  | 0.31  | 6.19E-01 | no |
| Npr1         | 0.26   | 0.40   | 0.65  | 6.19E-01 | no |
| Papd5        | 21.17  | 24.29  | 0.20  | 6.19E-01 | no |
| Plxnb3       | 0.04   | 0.09   | 1.10  | 6.19E-01 | no |
| Fbxl17       | 2.32   | 2.81   | 0.28  | 6.19E-01 | no |
| Zcchc2       | 20.83  | 18.25  | -0.19 | 6.19E-01 | no |
| Lpcat4       | 4.05   | 2.99   | -0.43 | 6.19E-01 | no |
| 1700084J12Ri | 6.94   | 4.97   | -0.48 | 6.19E-01 | no |
| Pvr11        | 0.10   | 0.05   | -1.10 | 6.19E-01 | no |
| Lsm4         | 53.91  | 45.17  | -0.26 | 6.20E-01 | no |
| Ass1         | 12.93  | 16.02  | 0.31  | 6.20E-01 | no |
| Gm2058       | 17.63  | 25.11  | 0.51  | 6.20E-01 | no |
| Nkd2         | 2.64   | 3.52   | 0.42  | 6.20E-01 | no |
| Acp2         | 2.94   | 3.78   | 0.36  | 6.20E-01 | no |
| Foxred1      | 18.27  | 15.04  | -0.28 | 6.20E-01 | no |
| Rdh14        | 9.20   | 11.81  | 0.36  | 6.20E-01 | no |
| Alg1         | 8.73   | 11.08  | 0.34  | 6.20E-01 | no |
| Zfp758       | 8.31   | 10.37  | 0.32  | 6.20E-01 | no |
| Zbtb4        | 3.07   | 3.80   | 0.31  | 6.20E-01 | no |
| Med13        | 31.68  | 27.31  | -0.21 | 6.20E-01 | no |
| Mtmr12       | 15.69  | 13.27  | -0.24 | 6.20E-01 | no |
| Gprin3       | 1.42   | 0.98   | -0.54 | 6.20E-01 | no |
| Tacc1        | 34.25  | 30.42  | -0.17 | 6.20E-01 | no |
| Ing2         | 9.63   | 7.70   | -0.32 | 6.20E-01 | no |
| Macc1        | 0.09   | 0.19   | 1.07  | 6.20E-01 | no |
| Pou4f1       | 0.10   | 0.20   | 0.95  | 6.20E-01 | no |
| Plcb4        | 1.72   | 2.35   | 0.45  | 6.20E-01 | no |
| Rtp4         | 8.60   | 11.10  | 0.37  | 6.20E-01 | no |
| Bmp1         | 0.65   | 0.42   | -0.61 | 6.20E-01 | no |
| Eid1         | 14.87  | 18.01  | 0.28  | 6.21E-01 | no |
| Vps41        | 14.16  | 16.93  | 0.26  | 6.21E-01 | no |
| Xrcc1        | 31.62  | 26.92  | -0.23 | 6.21E-01 | no |
| Eif4e3       | 17.60  | 21.19  | 0.27  | 6.21E-01 | no |
| Adora3       | 0.14   | 0.39   | 1.48  | 6.21E-01 | no |
| Dcaf10       | 10.37  | 8.77   | -0.24 | 6.21E-01 | no |
| Nudt15       | 7.15   | 5.59   | -0.36 | 6.21E-01 | no |
| Myo5c        | 0.47   | 0.67   | 0.52  | 6.21E-01 | no |
| Dnaja3       | 23.30  | 19.84  | -0.23 | 6.21E-01 | no |
| Mzt1         | 33.01  | 27.77  | -0.25 | 6.21E-01 | no |

|              |       |       |       |          |    |
|--------------|-------|-------|-------|----------|----|
| Stoml2       | 24.53 | 20.25 | -0.28 | 6.21E-01 | no |
| Cryl1        | 11.16 | 8.65  | -0.37 | 6.21E-01 | no |
| Slc29a3      | 5.15  | 6.34  | 0.30  | 6.22E-01 | no |
| Snhg8        | 22.05 | 17.11 | -0.37 | 6.22E-01 | no |
| Cpne3        | 15.48 | 13.13 | -0.24 | 6.22E-01 | no |
| Lsm3         | 41.36 | 33.30 | -0.31 | 6.22E-01 | no |
| Large        | 0.67  | 0.97  | 0.53  | 6.22E-01 | no |
| Golga1       | 7.09  | 8.63  | 0.28  | 6.22E-01 | no |
| Stat1        | 21.89 | 25.49 | 0.22  | 6.22E-01 | no |
| Fmo5         | 1.22  | 1.67  | 0.45  | 6.22E-01 | no |
| Zfp639       | 15.31 | 12.50 | -0.29 | 6.23E-01 | no |
| Gm10474      | 0.49  | 0.30  | -0.71 | 6.23E-01 | no |
| Brd3         | 43.98 | 38.71 | -0.18 | 6.23E-01 | no |
| Pkd1         | 5.81  | 6.80  | 0.23  | 6.23E-01 | no |
| Ttc9c        | 29.25 | 24.98 | -0.23 | 6.23E-01 | no |
| Myo10        | 2.07  | 1.62  | -0.35 | 6.23E-01 | no |
| Gbe1         | 7.01  | 8.83  | 0.33  | 6.23E-01 | no |
| Nsg2         | 3.21  | 4.30  | 0.42  | 6.24E-01 | no |
| Ccnjl        | 1.70  | 2.36  | 0.47  | 6.24E-01 | no |
| Lsg1         | 20.10 | 16.78 | -0.26 | 6.24E-01 | no |
| Traf2        | 14.83 | 12.35 | -0.26 | 6.24E-01 | no |
| 1190002H23Ri | 9.25  | 6.89  | -0.43 | 6.24E-01 | no |
| Mrto4        | 28.68 | 23.18 | -0.31 | 6.24E-01 | no |
| Cox5a        | 69.66 | 58.04 | -0.26 | 6.24E-01 | no |
| Fam162a      | 25.14 | 19.60 | -0.36 | 6.24E-01 | no |
| 4933407K13Ri | 1.95  | 2.63  | 0.43  | 6.24E-01 | no |
| Plxna1       | 5.00  | 5.95  | 0.25  | 6.24E-01 | no |
| Ints8        | 23.80 | 20.55 | -0.21 | 6.24E-01 | no |
| Polr3b       | 17.05 | 14.53 | -0.23 | 6.24E-01 | no |
| C1qc         | 1.05  | 0.65  | -0.70 | 6.24E-01 | no |
| Hist1h4d     | 1.49  | 0.63  | -1.25 | 6.24E-01 | no |
| Abhd13       | 18.08 | 15.58 | -0.21 | 6.24E-01 | no |
| AI314976     | 21.87 | 17.52 | -0.32 | 6.24E-01 | no |
| Ppcdc        | 10.92 | 13.28 | 0.28  | 6.24E-01 | no |
| Hist1h2bh    | 0.28  | 0.87  | 1.62  | 6.25E-01 | no |
| Bbs4         | 3.88  | 5.06  | 0.38  | 6.25E-01 | no |
| Pnpla6       | 8.09  | 9.66  | 0.25  | 6.25E-01 | no |
| Lcat         | 1.26  | 0.82  | -0.63 | 6.25E-01 | no |
| Gtf2a1l      | 0.12  | 0.28  | 1.29  | 6.25E-01 | no |
| Spaca1       | 0.37  | 0.70  | 0.92  | 6.25E-01 | no |
| Aldoart1     | 5.22  | 6.81  | 0.38  | 6.25E-01 | no |
| Lgi2         | 0.25  | 0.12  | -1.14 | 6.25E-01 | no |

|               |        |        |       |          |    |
|---------------|--------|--------|-------|----------|----|
| Snrnp70       | 68.18  | 58.72  | -0.22 | 6.25E-01 | no |
| Ttc37         | 9.14   | 7.62   | -0.26 | 6.25E-01 | no |
| Ube2z         | 24.57  | 21.04  | -0.22 | 6.25E-01 | no |
| Rnmtl1        | 7.02   | 5.33   | -0.40 | 6.25E-01 | no |
| Hspa5         | 100.08 | 89.59  | -0.16 | 6.26E-01 | no |
| Mrpl10        | 30.89  | 25.85  | -0.26 | 6.26E-01 | no |
| Zfyve27       | 9.88   | 11.55  | 0.22  | 6.26E-01 | no |
| Cep78         | 16.38  | 13.56  | -0.27 | 6.26E-01 | no |
| Cep57         | 30.64  | 26.33  | -0.22 | 6.27E-01 | no |
| Zc3h15        | 50.07  | 42.89  | -0.22 | 6.27E-01 | no |
| Hspbap1       | 1.74   | 1.28   | -0.44 | 6.27E-01 | no |
| Fus           | 104.52 | 90.38  | -0.21 | 6.27E-01 | no |
| Rab11fip3     | 1.70   | 2.41   | 0.50  | 6.27E-01 | no |
| 4930404I05Rik | 2.27   | 1.53   | -0.57 | 6.27E-01 | no |
| Zeb1          | 11.63  | 13.71  | 0.24  | 6.27E-01 | no |
| Sart1         | 23.16  | 19.93  | -0.22 | 6.27E-01 | no |
| Casp3         | 31.38  | 25.98  | -0.27 | 6.27E-01 | no |
| Ccdc85b       | 3.54   | 2.73   | -0.37 | 6.27E-01 | no |
| Med18         | 7.90   | 6.03   | -0.39 | 6.28E-01 | no |
| Vps4a         | 21.73  | 18.12  | -0.26 | 6.28E-01 | no |
| Crot          | 15.39  | 18.46  | 0.26  | 6.28E-01 | no |
| Mgst3         | 6.47   | 8.91   | 0.46  | 6.28E-01 | no |
| Tfg           | 38.61  | 32.77  | -0.24 | 6.28E-01 | no |
| AY358078      | 3.00   | 2.14   | -0.48 | 6.28E-01 | no |
| Tekt2         | 0.20   | 0.04   | -2.34 | 6.28E-01 | no |
| Fam167a       | 7.68   | 9.29   | 0.27  | 6.28E-01 | no |
| Fam20b        | 21.84  | 25.50  | 0.22  | 6.28E-01 | no |
| Larp4b        | 32.52  | 28.06  | -0.21 | 6.28E-01 | no |
| Herc4         | 21.56  | 18.44  | -0.23 | 6.28E-01 | no |
| Polr3g        | 5.02   | 3.87   | -0.37 | 6.28E-01 | no |
| Kcnab1        | 0.07   | 0.18   | 1.33  | 6.28E-01 | no |
| Gm9199        | 1.89   | 2.73   | 0.53  | 6.28E-01 | no |
| Prdm10        | 6.19   | 4.91   | -0.33 | 6.28E-01 | no |
| Mkl1          | 23.57  | 20.68  | -0.19 | 6.28E-01 | no |
| Sec14l1       | 10.01  | 8.42   | -0.25 | 6.28E-01 | no |
| H2afj         | 22.24  | 18.40  | -0.27 | 6.28E-01 | no |
| Actr3b        | 2.14   | 1.48   | -0.53 | 6.28E-01 | no |
| Ccdc78        | 0.96   | 0.63   | -0.60 | 6.28E-01 | no |
| Tgfbr3        | 0.90   | 1.23   | 0.46  | 6.30E-01 | no |
| Rps29         | 248.71 | 213.14 | -0.22 | 6.30E-01 | no |
| Tyms          | 17.07  | 14.41  | -0.24 | 6.30E-01 | no |
| Rsu1          | 18.10  | 22.22  | 0.30  | 6.30E-01 | no |



|             |       |       |            |          |    |
|-------------|-------|-------|------------|----------|----|
| Mknk1       | 13.88 | 16.70 | 0.27       | 6.30E-01 | no |
| Mtmr14      | 19.18 | 16.11 | -0.25      | 6.30E-01 | no |
| Arl6ip4     | 36.78 | 30.80 | -0.26      | 6.30E-01 | no |
| Mzf1        | 0.44  | 0.29  | -0.62      | 6.30E-01 | no |
| Heatr5a     | 8.59  | 7.29  | -0.24      | 6.31E-01 | no |
| Csnk1e      | 12.21 | 10.02 | -0.28      | 6.31E-01 | no |
| Akap5       | 0.63  | 0.44  | -0.51      | 6.31E-01 | no |
| Atp9b       | 12.97 | 15.30 | 0.24       | 6.31E-01 | no |
| Car1        | 0.95  | 0.57  | -0.75      | 6.31E-01 | no |
| Ncr1        | 0.16  | 0.35  | 1.14       | 6.31E-01 | no |
| BC049352    | 0.18  | 0.36  | 1.04       | 6.31E-01 | no |
| Dynll1      | 35.96 | 30.50 | -0.24      | 6.31E-01 | no |
| Rg9mtd3     | 6.88  | 5.29  | -0.38      | 6.31E-01 | no |
| H2-M3       | 14.15 | 17.53 | 0.31       | 6.31E-01 | no |
| Ccz1        | 29.38 | 24.62 | -0.26      | 6.31E-01 | no |
| Chic1       | 0.30  | 0.45  | 0.59       | 6.31E-01 | no |
| Prr15       | 0.98  | 1.46  | 0.58       | 6.31E-01 | no |
| Nvl         | 22.73 | 19.30 | -0.24      | 6.31E-01 | no |
| D3Erttd751e | 7.89  | 6.43  | -0.29      | 6.31E-01 | no |
| Tpcn2       | 4.91  | 6.26  | 0.35       | 6.31E-01 | no |
| Nop14       | 17.15 | 14.36 | -0.26      | 6.31E-01 | no |
| BC052040    | 7.61  | 6.03  | -0.34      | 6.31E-01 | no |
| AA619741    | 0.02  | 0.00  | -1.79769e- | 6.32E-01 | no |
| Acot12      | 0.02  | 0.00  | -1.79769e- | 6.32E-01 | no |
| BC021767    | 0.02  | 0.00  | -1.79769e- | 6.32E-01 | no |
| Chrm4       | 0.01  | 0.00  | -1.79769e- | 6.32E-01 | no |
| Clca2       | 0.01  | 0.00  | -1.79769e- | 6.32E-01 | no |
| Ddc8        | 0.02  | 0.00  | -1.79769e- | 6.32E-01 | no |
| Dlk2        | 0.03  | 0.00  | -1.79769e- | 6.32E-01 | no |
| Hcn1        | 0.01  | 0.00  | -1.79769e- | 6.32E-01 | no |
| Igf2as      | 0.01  | 0.00  | -1.79769e- | 6.32E-01 | no |
| Mab2111     | 0.02  | 0.00  | -1.79769e- | 6.32E-01 | no |
| Ndp         | 0.03  | 0.00  | -1.79769e- | 6.32E-01 | no |
| Ndufa4l2    | 0.04  | 0.00  | -1.79769e- | 6.32E-01 | no |
| Nudt10      | 0.03  | 0.00  | -1.79769e- | 6.32E-01 | no |
| Nudt11      | 0.02  | 0.00  | -1.79769e- | 6.32E-01 | no |
| Pnma3       | 0.01  | 0.00  | -1.79769e- | 6.32E-01 | no |
| Rdh16       | 0.02  | 0.00  | -1.79769e- | 6.32E-01 | no |
| Smok2b      | 0.03  | 0.00  | -1.79769e- | 6.32E-01 | no |
| Sema4f      | 0.02  | 0.08  | 2.04       | 6.32E-01 | no |
| Rgmb        | 0.06  | 0.17  | 1.50       | 6.32E-01 | no |
| Tmem220     | 0.43  | 0.77  | 0.82       | 6.32E-01 | no |

|              |       |        |            |          |    |
|--------------|-------|--------|------------|----------|----|
| Dgkg         | 0.09  | 0.16   | 0.79       | 6.32E-01 | no |
| Col9a3       | 0.26  | 0.41   | 0.67       | 6.32E-01 | no |
| Mettl7a2     | 0.65  | 1.01   | 0.63       | 6.32E-01 | no |
| Cacna1a      | 0.22  | 0.32   | 0.55       | 6.32E-01 | no |
| Hspb11       | 5.15  | 7.29   | 0.50       | 6.32E-01 | no |
| Bnip3        | 9.93  | 12.59  | 0.34       | 6.32E-01 | no |
| Ccdc125      | 10.46 | 12.69  | 0.28       | 6.32E-01 | no |
| 2010001M09R  | 94.68 | 110.48 | 0.22       | 6.32E-01 | no |
| Ap2b1        | 40.06 | 35.54  | -0.17      | 6.32E-01 | no |
| Cpsf1        | 34.02 | 30.10  | -0.18      | 6.32E-01 | no |
| Prpf40a      | 45.13 | 39.00  | -0.21      | 6.32E-01 | no |
| Glg1         | 24.11 | 20.69  | -0.22      | 6.32E-01 | no |
| Nop2         | 24.76 | 21.05  | -0.23      | 6.32E-01 | no |
| Cox4nb       | 13.39 | 11.36  | -0.24      | 6.32E-01 | no |
| Ubac2        | 25.62 | 21.55  | -0.25      | 6.32E-01 | no |
| Glo1         | 25.56 | 21.34  | -0.26      | 6.32E-01 | no |
| Slc15a4      | 18.10 | 15.11  | -0.26      | 6.32E-01 | no |
| Socs4        | 23.68 | 19.72  | -0.26      | 6.32E-01 | no |
| Calcr1       | 10.76 | 8.90   | -0.27      | 6.32E-01 | no |
| Ppp2r3c      | 12.40 | 10.02  | -0.31      | 6.32E-01 | no |
| Taf11        | 19.97 | 16.11  | -0.31      | 6.32E-01 | no |
| Coq6         | 14.02 | 11.20  | -0.32      | 6.32E-01 | no |
| Per2         | 2.76  | 2.17   | -0.35      | 6.32E-01 | no |
| Lpxn         | 6.59  | 4.99   | -0.40      | 6.32E-01 | no |
| Gadd45b      | 6.24  | 4.65   | -0.43      | 6.32E-01 | no |
| Tomt         | 4.82  | 3.54   | -0.44      | 6.32E-01 | no |
| Serpinc1     | 0.19  | 0.07   | -1.53      | 6.32E-01 | no |
| Rgnf         | 0.06  | 0.11   | 0.91       | 6.32E-01 | no |
| Tmem8        | 4.63  | 5.84   | 0.34       | 6.32E-01 | no |
| Tns3         | 10.91 | 12.74  | 0.22       | 6.32E-01 | no |
| Fam160b1     | 18.57 | 21.61  | 0.22       | 6.32E-01 | no |
| Slc9a3r1     | 47.75 | 41.04  | -0.22      | 6.32E-01 | no |
| Etfa         | 33.88 | 28.34  | -0.26      | 6.32E-01 | no |
| Rbm4b        | 21.06 | 17.37  | -0.28      | 6.32E-01 | no |
| Rqcd1        | 40.31 | 30.48  | -0.40      | 6.32E-01 | no |
| Pdlim3       | 0.21  | 0.04   | -2.31      | 6.32E-01 | no |
| Ctnnb1       | 15.49 | 12.94  | -0.26      | 6.32E-01 | no |
| 6330577E15Ri | 39.87 | 33.78  | -0.24      | 6.32E-01 | no |
| Ddx23        | 36.68 | 31.62  | -0.21      | 6.32E-01 | no |
| Pdzrn4       | 0.00  | 0.02   | 1.79769e+  | 6.32E-01 | no |
| Nags         | 0.04  | 0.00   | -1.79769e- | 6.32E-01 | no |
| Il1rl2       | 0.96  | 1.41   | 0.56       | 6.32E-01 | no |

|              |        |       |           |          |    |
|--------------|--------|-------|-----------|----------|----|
| Lrsam1       | 2.91   | 3.73  | 0.35      | 6.32E-01 | no |
| Hmgcll1      | 9.75   | 11.85 | 0.28      | 6.32E-01 | no |
| Cep63        | 10.01  | 12.14 | 0.28      | 6.32E-01 | no |
| F13a1        | 11.85  | 13.98 | 0.24      | 6.32E-01 | no |
| Rbpj         | 10.11  | 11.88 | 0.23      | 6.32E-01 | no |
| Smap2        | 36.97  | 42.92 | 0.22      | 6.32E-01 | no |
| 1110028C15Ri | 41.07  | 46.02 | 0.16      | 6.32E-01 | no |
| Arid1b       | 24.59  | 21.30 | -0.21     | 6.32E-01 | no |
| Wdr91        | 16.83  | 14.09 | -0.26     | 6.32E-01 | no |
| Eny2         | 12.85  | 10.35 | -0.31     | 6.32E-01 | no |
| Prr22        | 1.27   | 0.84  | -0.59     | 6.32E-01 | no |
| Plekhh1      | 1.85   | 0.36  | -2.37     | 6.32E-01 | no |
| 1500011H22Ri | 26.13  | 21.08 | -0.31     | 6.32E-01 | no |
| Srsf9        | 45.53  | 38.49 | -0.24     | 6.33E-01 | no |
| Ccnt1        | 23.16  | 19.45 | -0.25     | 6.33E-01 | no |
| Zfp771       | 16.44  | 13.08 | -0.33     | 6.33E-01 | no |
| Scml2        | 0.52   | 0.74  | 0.52      | 6.33E-01 | no |
| Bccip        | 36.53  | 30.53 | -0.26     | 6.33E-01 | no |
| Mageb3       | 0.21   | 0.10  | -1.11     | 6.33E-01 | no |
| Nrsn2        | 0.00   | 0.03  | 1.79769e+ | 6.33E-01 | no |
| Gcap14       | 10.84  | 9.32  | -0.22     | 6.33E-01 | no |
| Ncln         | 30.37  | 26.09 | -0.22     | 6.33E-01 | no |
| Ttc1         | 19.71  | 15.99 | -0.30     | 6.33E-01 | no |
| Rbm11        | 0.30   | 0.50  | 0.73      | 6.34E-01 | no |
| Pafah1b2     | 28.87  | 24.84 | -0.22     | 6.34E-01 | no |
| Bat1a        | 111.37 | 96.63 | -0.20     | 6.34E-01 | no |
| BC024814     | 3.38   | 4.59  | 0.44      | 6.34E-01 | no |
| Yy2          | 8.41   | 6.67  | -0.33     | 6.34E-01 | no |
| Gm14207      | 0.00   | 0.04  | 1.79769e+ | 6.34E-01 | no |
| Eid2         | 0.28   | 0.53  | 0.92      | 6.34E-01 | no |
| Dock7        | 3.95   | 4.83  | 0.29      | 6.34E-01 | no |
| Gna14        | 0.05   | 0.14  | 1.49      | 6.34E-01 | no |
| Fam13b       | 20.54  | 24.05 | 0.23      | 6.34E-01 | no |
| Eif2b4       | 17.57  | 14.61 | -0.27     | 6.34E-01 | no |
| 2510003E04Ri | 13.14  | 10.78 | -0.29     | 6.34E-01 | no |
| Aif1l        | 0.16   | 0.07  | -1.10     | 6.34E-01 | no |
| Mphosph6     | 15.00  | 11.67 | -0.36     | 6.34E-01 | no |
| Spsb1        | 0.59   | 0.87  | 0.57      | 6.34E-01 | no |
| Zfp354a      | 0.28   | 0.17  | -0.71     | 6.34E-01 | no |
| Ccndbp1      | 17.62  | 21.46 | 0.28      | 6.35E-01 | no |
| Galnt3       | 0.40   | 0.25  | -0.71     | 6.35E-01 | no |
| 2810055F11Ri | 0.10   | 0.28  | 1.40      | 6.35E-01 | no |

|               |        |        |       |          |    |
|---------------|--------|--------|-------|----------|----|
| Nif3l1        | 9.95   | 7.91   | -0.33 | 6.35E-01 | no |
| Fam82b        | 2.92   | 3.97   | 0.44  | 6.35E-01 | no |
| Fgf7          | 0.06   | 0.16   | 1.39  | 6.35E-01 | no |
| Qars          | 40.57  | 35.19  | -0.21 | 6.35E-01 | no |
| Lrmp          | 156.58 | 135.64 | -0.21 | 6.35E-01 | no |
| Cyp2t4        | 0.25   | 0.46   | 0.89  | 6.36E-01 | no |
| Tmem180       | 10.11  | 12.47  | 0.30  | 6.36E-01 | no |
| Inpp5k        | 24.06  | 28.17  | 0.23  | 6.36E-01 | no |
| 2010107G12Ri  | 0.65   | 0.97   | 0.58  | 6.36E-01 | no |
| Lrrc29        | 1.28   | 1.81   | 0.50  | 6.37E-01 | no |
| Al462493      | 16.49  | 20.84  | 0.34  | 6.37E-01 | no |
| Stag2         | 59.79  | 52.98  | -0.17 | 6.37E-01 | no |
| Zfp706        | 85.71  | 74.37  | -0.20 | 6.37E-01 | no |
| 1300001I01Rik | 24.38  | 21.12  | -0.21 | 6.37E-01 | no |
| Dcp1a         | 21.53  | 18.58  | -0.21 | 6.37E-01 | no |
| Tmem209       | 19.01  | 16.08  | -0.24 | 6.37E-01 | no |
| Sucla2        | 23.24  | 19.41  | -0.26 | 6.37E-01 | no |
| Pdhx          | 11.83  | 9.61   | -0.30 | 6.37E-01 | no |
| 1700003F12Ri  | 0.81   | 0.43   | -0.93 | 6.37E-01 | no |
| Podxl2        | 0.20   | 0.08   | -1.22 | 6.37E-01 | no |
| Zfp938        | 4.30   | 5.70   | 0.41  | 6.37E-01 | no |
| Gab1          | 4.10   | 5.10   | 0.31  | 6.37E-01 | no |
| Akirin2       | 30.93  | 25.98  | -0.25 | 6.37E-01 | no |
| Mfap1a        | 35.20  | 30.40  | -0.21 | 6.37E-01 | no |
| Metap2        | 29.82  | 25.81  | -0.21 | 6.37E-01 | no |
| Gm6548        | 22.33  | 18.66  | -0.26 | 6.37E-01 | no |
| Cyb5r3        | 13.67  | 11.17  | -0.29 | 6.37E-01 | no |
| Cyp26a1       | 0.19   | 0.06   | -1.65 | 6.37E-01 | no |
| Tyro3         | 0.31   | 0.20   | -0.66 | 6.38E-01 | no |
| Dnalc1        | 1.26   | 1.68   | 0.41  | 6.38E-01 | no |
| Fxr1          | 43.55  | 37.22  | -0.23 | 6.38E-01 | no |
| Slc35b4       | 17.01  | 14.40  | -0.24 | 6.38E-01 | no |
| Ccnd1         | 1.62   | 2.18   | 0.43  | 6.39E-01 | no |
| Avpr2         | 1.91   | 2.66   | 0.48  | 6.39E-01 | no |
| 6330545A04Ri  | 2.62   | 1.80   | -0.54 | 6.39E-01 | no |
| Lrch1         | 12.62  | 14.82  | 0.23  | 6.39E-01 | no |
| Plod1         | 1.08   | 0.77   | -0.49 | 6.39E-01 | no |
| G0s2          | 0.46   | 0.84   | 0.85  | 6.40E-01 | no |
| Zbtb12        | 16.13  | 13.25  | -0.28 | 6.40E-01 | no |
| Acap1         | 46.11  | 39.88  | -0.21 | 6.40E-01 | no |
| Mettl6        | 22.76  | 18.97  | -0.26 | 6.40E-01 | no |
| Trmt61a       | 10.62  | 8.69   | -0.29 | 6.41E-01 | no |

|               |       |       |           |          |    |
|---------------|-------|-------|-----------|----------|----|
| Gm10391       | 0.00  | 0.05  | 1.79769e+ | 6.41E-01 | no |
| Rab39b        | 0.17  | 0.07  | -1.21     | 6.41E-01 | no |
| Usp7          | 45.46 | 52.37 | 0.20      | 6.42E-01 | no |
| Zdhhc5        | 23.87 | 20.60 | -0.21     | 6.42E-01 | no |
| Tomm7         | 25.31 | 20.41 | -0.31     | 6.42E-01 | no |
| Klk8          | 2.72  | 3.75  | 0.46      | 6.42E-01 | no |
| Panx1         | 20.43 | 24.28 | 0.25      | 6.42E-01 | no |
| Lmbr1         | 0.58  | 0.81  | 0.50      | 6.42E-01 | no |
| Uqcr11        | 56.68 | 45.89 | -0.30     | 6.42E-01 | no |
| Mex3d         | 3.78  | 4.80  | 0.35      | 6.42E-01 | no |
| Cpsf3         | 27.05 | 23.10 | -0.23     | 6.42E-01 | no |
| Usp31         | 6.07  | 5.14  | -0.24     | 6.42E-01 | no |
| Tbl1xr1       | 20.38 | 17.65 | -0.21     | 6.42E-01 | no |
| Rbm33         | 26.19 | 22.75 | -0.20     | 6.42E-01 | no |
| Rab14         | 54.05 | 46.82 | -0.21     | 6.42E-01 | no |
| Mtmr6         | 16.99 | 19.93 | 0.23      | 6.43E-01 | no |
| Cables2       | 19.19 | 16.24 | -0.24     | 6.43E-01 | no |
| Zfp365        | 0.33  | 0.21  | -0.65     | 6.43E-01 | no |
| Micall1       | 5.98  | 7.09  | 0.25      | 6.43E-01 | no |
| Ssna1         | 49.86 | 41.92 | -0.25     | 6.43E-01 | no |
| Sla2          | 1.48  | 8.64  | 2.55      | 6.43E-01 | no |
| Ppcs          | 7.82  | 10.04 | 0.36      | 6.43E-01 | no |
| Mnda          | 8.92  | 11.25 | 0.34      | 6.43E-01 | no |
| Glud1         | 36.83 | 31.82 | -0.21     | 6.43E-01 | no |
| 1810026J23RiI | 22.92 | 19.55 | -0.23     | 6.43E-01 | no |
| Aen           | 19.85 | 16.91 | -0.23     | 6.43E-01 | no |
| Rhag          | 0.21  | 0.08  | -1.48     | 6.43E-01 | no |
| Dqx1          | 2.27  | 2.99  | 0.40      | 6.44E-01 | no |
| Lage3         | 24.42 | 19.48 | -0.33     | 6.44E-01 | no |
| Ppp3cb        | 42.03 | 36.40 | -0.21     | 6.44E-01 | no |
| Ctss          | 21.50 | 26.09 | 0.28      | 6.45E-01 | no |
| Myd88         | 15.64 | 18.84 | 0.27      | 6.45E-01 | no |
| Sdccag1       | 20.93 | 17.92 | -0.22     | 6.45E-01 | no |
| Nip7          | 14.77 | 12.42 | -0.25     | 6.45E-01 | no |
| Gm10094       | 53.47 | 44.70 | -0.26     | 6.45E-01 | no |
| Gnpnat1       | 7.73  | 6.06  | -0.35     | 6.45E-01 | no |
| Aqp11         | 0.33  | 0.14  | -1.24     | 6.45E-01 | no |
| 1700084E18Ri  | 0.72  | 1.41  | 0.97      | 6.45E-01 | no |
| Spice1        | 7.87  | 6.48  | -0.28     | 6.45E-01 | no |
| Stard5        | 5.09  | 3.90  | -0.38     | 6.45E-01 | no |
| Mylpf         | 5.11  | 6.96  | 0.45      | 6.45E-01 | no |
| Pim1          | 42.60 | 49.58 | 0.22      | 6.45E-01 | no |

|               |       |       |           |          |    |
|---------------|-------|-------|-----------|----------|----|
| Acly          | 50.11 | 44.98 | -0.16     | 6.45E-01 | no |
| Cd2ap         | 19.44 | 16.71 | -0.22     | 6.45E-01 | no |
| Klhl11        | 11.20 | 9.10  | -0.30     | 6.45E-01 | no |
| Adat1         | 4.08  | 3.16  | -0.37     | 6.45E-01 | no |
| Zc3h7a        | 37.81 | 33.45 | -0.18     | 6.45E-01 | no |
| Prkar2b       | 4.80  | 3.73  | -0.36     | 6.45E-01 | no |
| Hist2h3c1     | 1.71  | 0.84  | -1.03     | 6.46E-01 | no |
| Mrpl36        | 36.39 | 29.87 | -0.29     | 6.46E-01 | no |
| Mrps12        | 25.32 | 20.08 | -0.33     | 6.46E-01 | no |
| Doc2a         | 6.01  | 4.73  | -0.35     | 6.46E-01 | no |
| Abca1         | 2.81  | 3.42  | 0.28      | 6.46E-01 | no |
| Cxxc1         | 36.78 | 31.77 | -0.21     | 6.46E-01 | no |
| Abl2          | 14.88 | 13.25 | -0.17     | 6.46E-01 | no |
| Zbed3         | 29.06 | 24.62 | -0.24     | 6.46E-01 | no |
| 1700008J07Ril | 5.91  | 4.59  | -0.36     | 6.46E-01 | no |
| lqcd          | 0.73  | 0.47  | -0.63     | 6.46E-01 | no |
| Morn4         | 0.14  | 0.04  | -1.77     | 6.46E-01 | no |
| Tmem63b       | 6.20  | 7.66  | 0.30      | 6.46E-01 | no |
| A830082N09R   | 0.49  | 0.83  | 0.74      | 6.46E-01 | no |
| Dusp15        | 0.23  | 0.07  | -1.78     | 6.46E-01 | no |
| Arl8b         | 33.32 | 38.65 | 0.21      | 6.46E-01 | no |
| Lipm          | 0.00  | 0.02  | 1.79769e+ | 6.47E-01 | no |
| 1700019L03Ril | 0.13  | 0.26  | 1.06      | 6.47E-01 | no |
| Tppp3         | 0.46  | 0.77  | 0.75      | 6.47E-01 | no |
| Cdk5          | 8.25  | 10.29 | 0.32      | 6.47E-01 | no |
| D630045J12Ril | 2.18  | 2.66  | 0.29      | 6.47E-01 | no |
| Zfhx2         | 3.98  | 4.74  | 0.25      | 6.47E-01 | no |
| Fam179b       | 10.20 | 11.93 | 0.23      | 6.47E-01 | no |
| Ogfr          | 27.07 | 31.47 | 0.22      | 6.47E-01 | no |
| Cnot6         | 54.47 | 47.22 | -0.21     | 6.47E-01 | no |
| Ythdf1        | 33.03 | 28.51 | -0.21     | 6.47E-01 | no |
| Zfp828        | 18.76 | 16.08 | -0.22     | 6.47E-01 | no |
| Cops2         | 27.18 | 23.28 | -0.22     | 6.47E-01 | no |
| Slc35e3       | 16.59 | 14.02 | -0.24     | 6.47E-01 | no |
| Snrpd3        | 57.67 | 47.82 | -0.27     | 6.47E-01 | no |
| Ttc27         | 12.30 | 10.15 | -0.28     | 6.47E-01 | no |
| Znhit3        | 12.56 | 9.69  | -0.37     | 6.47E-01 | no |
| B230118H07Ril | 2.48  | 1.79  | -0.47     | 6.47E-01 | no |
| H19           | 0.15  | 0.06  | -1.23     | 6.47E-01 | no |
| Ireb2         | 31.94 | 27.73 | -0.20     | 6.47E-01 | no |
| Guk1          | 14.88 | 11.76 | -0.34     | 6.47E-01 | no |
| Dhx37         | 17.62 | 20.46 | 0.22      | 6.47E-01 | no |

|              |        |        |       |          |    |
|--------------|--------|--------|-------|----------|----|
| Bbx          | 11.44  | 13.27  | 0.21  | 6.47E-01 | no |
| Tuba8        | 0.40   | 0.19   | -1.04 | 6.47E-01 | no |
| Ncoa1        | 7.76   | 9.09   | 0.23  | 6.47E-01 | no |
| Ccdc28a      | 5.01   | 6.68   | 0.41  | 6.48E-01 | no |
| Cyp4f18      | 10.97  | 13.61  | 0.31  | 6.48E-01 | no |
| Sec24d       | 2.29   | 2.97   | 0.38  | 6.48E-01 | no |
| Grk6         | 61.82  | 55.64  | -0.15 | 6.48E-01 | no |
| Rps20        | 697.31 | 606.61 | -0.20 | 6.48E-01 | no |
| Atp5d        | 62.22  | 52.98  | -0.23 | 6.48E-01 | no |
| Orai3        | 15.79  | 12.96  | -0.28 | 6.48E-01 | no |
| Fancl        | 12.62  | 10.07  | -0.33 | 6.48E-01 | no |
| Akap17b      | 2.61   | 2.04   | -0.35 | 6.48E-01 | no |
| Mdga1        | 0.02   | 0.05   | 1.37  | 6.48E-01 | no |
| Fbxo31       | 7.74   | 6.08   | -0.35 | 6.48E-01 | no |
| Tm6sf1       | 21.07  | 25.06  | 0.25  | 6.49E-01 | no |
| Zfp598       | 27.02  | 23.32  | -0.21 | 6.49E-01 | no |
| 4930563E22Ri | 0.23   | 0.37   | 0.69  | 6.49E-01 | no |
| Zfp764       | 5.75   | 7.21   | 0.32  | 6.49E-01 | no |
| Slc14a1      | 5.65   | 4.55   | -0.31 | 6.49E-01 | no |
| AW549877     | 25.78  | 29.78  | 0.21  | 6.49E-01 | no |
| Srl          | 4.05   | 3.25   | -0.32 | 6.49E-01 | no |
| Kif13b       | 7.42   | 8.77   | 0.24  | 6.50E-01 | no |
| Serpine2     | 0.24   | 0.11   | -1.18 | 6.50E-01 | no |
| Sh3glb2      | 17.64  | 21.10  | 0.26  | 6.50E-01 | no |
| Stat2        | 15.30  | 17.80  | 0.22  | 6.50E-01 | no |
| Zxda         | 3.30   | 4.07   | 0.30  | 6.50E-01 | no |
| Mrpl40       | 21.72  | 17.65  | -0.30 | 6.50E-01 | no |
| Gm15760      | 1.58   | 1.16   | -0.44 | 6.50E-01 | no |
| Tomm22       | 68.14  | 58.27  | -0.23 | 6.51E-01 | no |
| Ccar1        | 36.96  | 32.15  | -0.20 | 6.51E-01 | no |
| AV249152     | 3.77   | 2.87   | -0.40 | 6.51E-01 | no |
| Lrrc61       | 10.92  | 13.05  | 0.26  | 6.51E-01 | no |
| A530098C11Ri | 0.06   | 0.25   | 1.95  | 6.51E-01 | no |
| Bet1l        | 9.06   | 11.40  | 0.33  | 6.51E-01 | no |
| Cast         | 11.58  | 13.85  | 0.26  | 6.51E-01 | no |
| Wac          | 29.53  | 26.07  | -0.18 | 6.51E-01 | no |
| Dip2b        | 16.76  | 14.76  | -0.18 | 6.51E-01 | no |
| Coq5         | 14.48  | 11.90  | -0.28 | 6.51E-01 | no |
| Prpf8        | 66.68  | 57.82  | -0.21 | 6.51E-01 | no |
| D1Bwg0212e   | 18.63  | 15.82  | -0.24 | 6.51E-01 | no |
| Gm711        | 0.19   | 0.34   | 0.84  | 6.51E-01 | no |
| Arid2        | 31.01  | 27.00  | -0.20 | 6.52E-01 | no |

|              |        |        |       |          |    |
|--------------|--------|--------|-------|----------|----|
| Wbp2nl       | 0.29   | 0.10   | -1.46 | 6.52E-01 | no |
| 1810024B03Ri | 0.35   | 0.13   | -1.46 | 6.52E-01 | no |
| Cox7b        | 42.36  | 35.24  | -0.27 | 6.52E-01 | no |
| Etv4         | 0.20   | 0.10   | -1.04 | 6.52E-01 | no |
| Fpr1         | 0.07   | 0.32   | 2.22  | 6.52E-01 | no |
| Capza1       | 172.34 | 149.51 | -0.21 | 6.52E-01 | no |
| Tmem50b      | 16.28  | 13.41  | -0.28 | 6.52E-01 | no |
| Polr2j       | 44.09  | 35.97  | -0.29 | 6.52E-01 | no |
| Mrpl39       | 25.32  | 20.56  | -0.30 | 6.52E-01 | no |
| Myadml2      | 0.87   | 0.59   | -0.56 | 6.52E-01 | no |
| AK129341     | 0.11   | 0.04   | -1.46 | 6.52E-01 | no |
| Foxo6        | 0.24   | 0.14   | -0.84 | 6.52E-01 | no |
| Grb2         | 52.88  | 45.92  | -0.20 | 6.52E-01 | no |
| Ddx51        | 10.08  | 8.49   | -0.25 | 6.52E-01 | no |
| Ppp1r13l     | 1.37   | 1.00   | -0.45 | 6.52E-01 | no |
| N4bp3        | 18.23  | 21.43  | 0.23  | 6.52E-01 | no |
| Ewsr1        | 110.67 | 96.48  | -0.20 | 6.52E-01 | no |
| Ubqln4       | 25.87  | 22.34  | -0.21 | 6.52E-01 | no |
| Psmb5        | 89.82  | 77.26  | -0.22 | 6.52E-01 | no |
| Lrp5         | 8.31   | 9.80   | 0.24  | 6.52E-01 | no |
| Arid1a       | 56.88  | 49.32  | -0.21 | 6.52E-01 | no |
| Smo          | 2.09   | 2.72   | 0.38  | 6.53E-01 | no |
| Stfa2l1      | 0.25   | 0.96   | 1.95  | 6.53E-01 | no |
| Mtmr3        | 30.31  | 34.80  | 0.20  | 6.53E-01 | no |
| Vkorc1l1     | 11.12  | 8.64   | -0.37 | 6.53E-01 | no |
| Pde12        | 15.29  | 12.94  | -0.24 | 6.53E-01 | no |
| Senp3        | 37.68  | 33.06  | -0.19 | 6.53E-01 | no |
| Rnf122       | 2.03   | 2.68   | 0.40  | 6.53E-01 | no |
| Rgag4        | 5.75   | 6.91   | 0.26  | 6.53E-01 | no |
| Ddb1         | 69.25  | 60.39  | -0.20 | 6.53E-01 | no |
| Psmd5        | 23.18  | 19.48  | -0.25 | 6.53E-01 | no |
| Id2          | 2.78   | 1.97   | -0.50 | 6.53E-01 | no |
| Ppp4r4       | 0.12   | 0.05   | -1.24 | 6.53E-01 | no |
| Plk3         | 0.72   | 0.48   | -0.58 | 6.54E-01 | no |
| 2810047C21Ri | 0.18   | 0.36   | 0.99  | 6.54E-01 | no |
| Rsl1         | 5.49   | 7.09   | 0.37  | 6.54E-01 | no |
| Tmprss4      | 0.37   | 0.58   | 0.66  | 6.54E-01 | no |
| 3000002C10Ri | 1.37   | 1.97   | 0.53  | 6.54E-01 | no |
| Blzf1        | 6.16   | 5.00   | -0.30 | 6.54E-01 | no |
| Ppm1l        | 1.93   | 2.52   | 0.39  | 6.54E-01 | no |
| Hyal2        | 4.01   | 5.23   | 0.38  | 6.54E-01 | no |
| Sugp2        | 22.65  | 19.96  | -0.18 | 6.55E-01 | no |



|              |       |       |           |          |    |
|--------------|-------|-------|-----------|----------|----|
| Setd5        | 40.16 | 35.03 | -0.20     | 6.56E-01 | no |
| Rbm27        | 18.94 | 16.40 | -0.21     | 6.56E-01 | no |
| Mpi          | 11.57 | 9.28  | -0.32     | 6.56E-01 | no |
| Nos3         | 0.00  | 0.01  | 1.79769e+ | 6.56E-01 | no |
| Tmem195      | 0.11  | 0.27  | 1.26      | 6.56E-01 | no |
| Tnfsf9       | 1.54  | 2.21  | 0.53      | 6.56E-01 | no |
| Arl5c        | 57.07 | 65.93 | 0.21      | 6.56E-01 | no |
| Dhdh         | 2.44  | 1.83  | -0.42     | 6.56E-01 | no |
| Spsb4        | 1.20  | 0.84  | -0.52     | 6.56E-01 | no |
| Gnb5         | 0.43  | 0.71  | 0.74      | 6.56E-01 | no |
| 4833413D08Ri | 0.00  | 0.02  | 1.79769e+ | 6.56E-01 | no |
| 4930444G20Ri | 0.00  | 0.02  | 1.79769e+ | 6.56E-01 | no |
| 5430413K10Ri | 0.00  | 0.02  | 1.79769e+ | 6.56E-01 | no |
| AF366264     | 0.00  | 0.01  | 1.79769e+ | 6.56E-01 | no |
| Apol10a      | 0.00  | 0.01  | 1.79769e+ | 6.56E-01 | no |
| BC026782     | 0.00  | 0.03  | 1.79769e+ | 6.56E-01 | no |
| BC100530     | 0.00  | 0.08  | 1.79769e+ | 6.56E-01 | no |
| Cyp2j7-ps    | 0.00  | 0.02  | 1.79769e+ | 6.56E-01 | no |
| E130114P18Ri | 0.00  | 0.04  | 1.79769e+ | 6.56E-01 | no |
| Fbxw14       | 0.00  | 0.03  | 1.79769e+ | 6.56E-01 | no |
| Ivl          | 0.00  | 0.01  | 1.79769e+ | 6.56E-01 | no |
| Kctd19       | 0.00  | 0.01  | 1.79769e+ | 6.56E-01 | no |
| Klra6        | 0.00  | 0.03  | 1.79769e+ | 6.56E-01 | no |
| L1td1        | 0.00  | 0.01  | 1.79769e+ | 6.56E-01 | no |
| Nlrp2        | 0.00  | 0.01  | 1.79769e+ | 6.56E-01 | no |
| Prl2c2       | 0.00  | 0.05  | 1.79769e+ | 6.56E-01 | no |
| Psapl1       | 0.00  | 0.01  | 1.79769e+ | 6.56E-01 | no |
| Pzp          | 0.00  | 0.01  | 1.79769e+ | 6.56E-01 | no |
| Serpina1a    | 0.00  | 0.02  | 1.79769e+ | 6.56E-01 | no |
| Serpina1c    | 0.00  | 0.02  | 1.79769e+ | 6.56E-01 | no |
| Vmn2r2       | 0.00  | 0.02  | 1.79769e+ | 6.56E-01 | no |
| Zfp819       | 0.00  | 0.01  | 1.79769e+ | 6.56E-01 | no |
| Cd200r2      | 0.00  | 0.02  | 1.79769e+ | 6.56E-01 | no |
| Pramel5      | 0.00  | 0.02  | 1.79769e+ | 6.56E-01 | no |
| 1700013N18Ri | 0.00  | 0.03  | 1.79769e+ | 6.56E-01 | no |
| 1700108J01Ri | 0.00  | 0.09  | 1.79769e+ | 6.56E-01 | no |
| 4933407L21Ri | 0.00  | 0.03  | 1.79769e+ | 6.56E-01 | no |
| 4933415F23Ri | 0.00  | 0.02  | 1.79769e+ | 6.56E-01 | no |
| 4933439F11Ri | 0.00  | 0.02  | 1.79769e+ | 6.56E-01 | no |
| Ccdc144b     | 0.00  | 0.02  | 1.79769e+ | 6.56E-01 | no |
| Dkk1         | 0.00  | 0.02  | 1.79769e+ | 6.56E-01 | no |
| Fam166b      | 0.00  | 0.03  | 1.79769e+ | 6.56E-01 | no |

|              |       |       |            |          |    |
|--------------|-------|-------|------------|----------|----|
| Gm14461      | 0.00  | 0.02  | 1.79769e+  | 6.56E-01 | no |
| Gm9961       | 0.00  | 0.08  | 1.79769e+  | 6.56E-01 | no |
| Ifnk         | 0.00  | 0.05  | 1.79769e+  | 6.56E-01 | no |
| Nr2e3        | 0.00  | 0.02  | 1.79769e+  | 6.56E-01 | no |
| Oxct2a       | 0.00  | 0.02  | 1.79769e+  | 6.56E-01 | no |
| Pou5f1       | 0.00  | 0.03  | 1.79769e+  | 6.56E-01 | no |
| Syt1         | 0.00  | 0.01  | 1.79769e+  | 6.56E-01 | no |
| Tll2         | 0.00  | 0.02  | 1.79769e+  | 6.56E-01 | no |
| Usp9y        | 0.00  | 0.00  | 1.79769e+  | 6.56E-01 | no |
| Khdc1a       | 0.02  | 0.00  | -1.79769e- | 6.56E-01 | no |
| Khdc1c       | 0.05  | 0.00  | -1.79769e- | 6.56E-01 | no |
| Klra14       | 0.05  | 0.00  | -1.79769e- | 6.56E-01 | no |
| St18         | 0.01  | 0.06  | 2.17       | 6.56E-01 | no |
| Gm14164      | 0.05  | 0.19  | 1.92       | 6.56E-01 | no |
| Camk2n1      | 0.03  | 0.11  | 1.92       | 6.56E-01 | no |
| Glp1r        | 0.05  | 0.18  | 1.91       | 6.56E-01 | no |
| Vmn2r29      | 0.09  | 0.23  | 1.30       | 6.56E-01 | no |
| Ccr10        | 0.14  | 0.30  | 1.12       | 6.56E-01 | no |
| Slc11a1      | 0.17  | 0.32  | 0.88       | 6.56E-01 | no |
| Nxf2         | 0.24  | 0.40  | 0.74       | 6.56E-01 | no |
| Cypr1        | 0.33  | 0.54  | 0.70       | 6.56E-01 | no |
| Asap3        | 0.11  | 0.18  | 0.68       | 6.56E-01 | no |
| Egfl8        | 0.70  | 1.08  | 0.62       | 6.56E-01 | no |
| Dock3        | 0.10  | 0.16  | 0.62       | 6.56E-01 | no |
| Stox1        | 0.40  | 0.60  | 0.57       | 6.56E-01 | no |
| Cml1         | 1.46  | 2.11  | 0.54       | 6.56E-01 | no |
| Smarcd3      | 0.83  | 1.20  | 0.53       | 6.56E-01 | no |
| F2rl3        | 1.14  | 1.63  | 0.51       | 6.56E-01 | no |
| Plod2        | 1.03  | 1.44  | 0.49       | 6.56E-01 | no |
| 2310030N02Ri | 5.45  | 7.20  | 0.40       | 6.56E-01 | no |
| Mmaa         | 2.28  | 3.01  | 0.40       | 6.56E-01 | no |
| Ctbs         | 3.24  | 4.25  | 0.39       | 6.56E-01 | no |
| 1110067D22Ri | 2.89  | 3.73  | 0.37       | 6.56E-01 | no |
| Lrp1         | 0.68  | 0.87  | 0.35       | 6.56E-01 | no |
| Zkscan6      | 6.72  | 8.35  | 0.31       | 6.56E-01 | no |
| Gpr137       | 8.29  | 10.27 | 0.31       | 6.56E-01 | no |
| H2-Ke6       | 17.85 | 22.03 | 0.30       | 6.56E-01 | no |
| Plekham3     | 3.27  | 3.95  | 0.28       | 6.56E-01 | no |
| Plekha5      | 4.67  | 5.65  | 0.28       | 6.56E-01 | no |
| Txlng        | 8.03  | 9.67  | 0.27       | 6.56E-01 | no |
| Trappc3      | 22.46 | 27.00 | 0.27       | 6.56E-01 | no |
| AW555464     | 4.15  | 4.98  | 0.26       | 6.56E-01 | no |

|               |        |        |       |          |    |
|---------------|--------|--------|-------|----------|----|
| Tmem87b       | 8.18   | 9.78   | 0.26  | 6.56E-01 | no |
| Acads         | 18.72  | 22.24  | 0.25  | 6.56E-01 | no |
| Mndal         | 52.47  | 60.53  | 0.21  | 6.56E-01 | no |
| Malat1        | 59.24  | 68.26  | 0.20  | 6.56E-01 | no |
| 4932438A13Ri  | 17.04  | 19.55  | 0.20  | 6.56E-01 | no |
| Shc1          | 39.46  | 34.81  | -0.18 | 6.56E-01 | no |
| Itch          | 23.05  | 20.30  | -0.18 | 6.56E-01 | no |
| 5830417110Rik | 16.33  | 14.25  | -0.20 | 6.56E-01 | no |
| Preli1        | 133.35 | 116.28 | -0.20 | 6.56E-01 | no |
| Itpr3         | 22.08  | 19.24  | -0.20 | 6.56E-01 | no |
| Thrap3        | 84.63  | 73.67  | -0.20 | 6.56E-01 | no |
| Cnot3         | 38.64  | 33.62  | -0.20 | 6.56E-01 | no |
| Ssr3          | 56.85  | 49.45  | -0.20 | 6.56E-01 | no |
| Tmsb4x        | 228.47 | 198.63 | -0.20 | 6.56E-01 | no |
| Neurl4        | 19.75  | 17.15  | -0.20 | 6.56E-01 | no |
| Tmem167       | 11.13  | 9.65   | -0.21 | 6.56E-01 | no |
| Rab1          | 39.60  | 34.26  | -0.21 | 6.56E-01 | no |
| Rars          | 33.85  | 29.10  | -0.22 | 6.56E-01 | no |
| Heatr6        | 13.30  | 11.43  | -0.22 | 6.56E-01 | no |
| 5430437P03Ri  | 33.56  | 28.60  | -0.23 | 6.56E-01 | no |
| Plrg1         | 30.80  | 26.18  | -0.23 | 6.56E-01 | no |
| Ddx56         | 16.11  | 13.69  | -0.23 | 6.56E-01 | no |
| Wdr61         | 31.01  | 26.24  | -0.24 | 6.56E-01 | no |
| Ift172        | 8.47   | 7.16   | -0.24 | 6.56E-01 | no |
| Glrx          | 40.74  | 34.40  | -0.24 | 6.56E-01 | no |
| Ssr2          | 36.51  | 30.71  | -0.25 | 6.56E-01 | no |
| Pcid2         | 17.90  | 15.05  | -0.25 | 6.56E-01 | no |
| 2610024G14Ri  | 15.58  | 12.99  | -0.26 | 6.56E-01 | no |
| Cyp51         | 9.02   | 7.50   | -0.27 | 6.56E-01 | no |
| Xylt1         | 10.58  | 8.80   | -0.27 | 6.56E-01 | no |
| Mbtps2        | 8.24   | 6.81   | -0.27 | 6.56E-01 | no |
| Uqcrq         | 56.88  | 46.67  | -0.29 | 6.56E-01 | no |
| Tsfm          | 20.48  | 16.72  | -0.29 | 6.56E-01 | no |
| Gm3414        | 3.38   | 2.73   | -0.31 | 6.56E-01 | no |
| Zfp595        | 5.58   | 4.45   | -0.33 | 6.56E-01 | no |
| Dscc1         | 13.04  | 10.37  | -0.33 | 6.56E-01 | no |
| Tmem29        | 8.27   | 6.46   | -0.36 | 6.56E-01 | no |
| Wrb           | 5.74   | 4.47   | -0.36 | 6.56E-01 | no |
| Zc3h8         | 7.81   | 6.07   | -0.36 | 6.56E-01 | no |
| Pdss1         | 7.63   | 5.91   | -0.37 | 6.56E-01 | no |
| Stx1a         | 4.18   | 3.21   | -0.38 | 6.56E-01 | no |
| Arsk          | 3.14   | 2.40   | -0.39 | 6.56E-01 | no |

|              |        |       |       |          |    |
|--------------|--------|-------|-------|----------|----|
| Fcgr3        | 2.25   | 1.60  | -0.49 | 6.56E-01 | no |
| Phyhd1       | 1.82   | 1.25  | -0.54 | 6.56E-01 | no |
| Ppia         | 2.97   | 2.04  | -0.54 | 6.56E-01 | no |
| Gdpd5        | 0.34   | 0.22  | -0.62 | 6.56E-01 | no |
| Alk          | 0.08   | 0.04  | -1.02 | 6.56E-01 | no |
| Gm9159       | 0.23   | 0.10  | -1.24 | 6.56E-01 | no |
| A430110N23R  | 0.07   | 0.03  | -1.45 | 6.56E-01 | no |
| Gm6583       | 0.12   | 0.04  | -1.60 | 6.56E-01 | no |
| Sap30l       | 12.84  | 15.64 | 0.28  | 6.56E-01 | no |
| Sec63        | 33.00  | 28.78 | -0.20 | 6.56E-01 | no |
| Rer1         | 34.98  | 29.56 | -0.24 | 6.56E-01 | no |
| Dcxr         | 4.98   | 6.65  | 0.42  | 6.56E-01 | no |
| Map1lc3a     | 5.68   | 7.51  | 0.40  | 6.56E-01 | no |
| Ino80        | 18.80  | 16.34 | -0.20 | 6.56E-01 | no |
| Dcaf15       | 28.92  | 24.88 | -0.22 | 6.56E-01 | no |
| Nfkbil1      | 9.77   | 12.13 | 0.31  | 6.57E-01 | no |
| Gpaa1        | 23.54  | 19.94 | -0.24 | 6.57E-01 | no |
| Zswim6       | 2.77   | 2.18  | -0.35 | 6.57E-01 | no |
| Vash2        | 0.49   | 0.73  | 0.58  | 6.57E-01 | no |
| 4933439C10Ri | 34.06  | 39.53 | 0.21  | 6.57E-01 | no |
| Adrm1        | 54.80  | 47.39 | -0.21 | 6.57E-01 | no |
| Cetn3        | 35.10  | 29.02 | -0.27 | 6.57E-01 | no |
| Abcg4        | 0.27   | 0.17  | -0.68 | 6.57E-01 | no |
| Zc3h12c      | 1.85   | 2.39  | 0.36  | 6.57E-01 | no |
| Suv420h2     | 33.64  | 29.30 | -0.20 | 6.57E-01 | no |
| Mtap7d1      | 14.63  | 12.60 | -0.22 | 6.57E-01 | no |
| Psmc2        | 30.33  | 25.85 | -0.23 | 6.57E-01 | no |
| Srgap3       | 0.76   | 0.57  | -0.41 | 6.57E-01 | no |
| Bbs5         | 1.55   | 1.05  | -0.56 | 6.57E-01 | no |
| Zfp870       | 3.28   | 2.60  | -0.34 | 6.57E-01 | no |
| Gmeb1        | 12.51  | 10.87 | -0.20 | 6.57E-01 | no |
| Akr1c12      | 0.37   | 0.64  | 0.79  | 6.58E-01 | no |
| Jmjd1c       | 24.29  | 27.83 | 0.20  | 6.58E-01 | no |
| 8430410K20Ri | 8.70   | 10.60 | 0.28  | 6.58E-01 | no |
| Fads2        | 16.70  | 13.57 | -0.30 | 6.58E-01 | no |
| Dhdds        | 20.51  | 17.58 | -0.22 | 6.58E-01 | no |
| Stk30        | 0.40   | 0.22  | -0.84 | 6.58E-01 | no |
| Hormad2      | 0.26   | 0.06  | -2.20 | 6.58E-01 | no |
| Cox15        | 13.58  | 11.62 | -0.23 | 6.58E-01 | no |
| Zdhhc15      | 2.90   | 2.28  | -0.35 | 6.58E-01 | no |
| Eif4h        | 101.06 | 88.44 | -0.19 | 6.58E-01 | no |
| Gm514        | 0.21   | 0.07  | -1.57 | 6.59E-01 | no |

|               |       |       |       |          |    |
|---------------|-------|-------|-------|----------|----|
| Jak2          | 13.39 | 15.45 | 0.21  | 6.59E-01 | no |
| Ndufb9        | 51.51 | 42.90 | -0.26 | 6.59E-01 | no |
| Prdm9         | 6.29  | 5.09  | -0.31 | 6.59E-01 | no |
| Ehhadh        | 3.11  | 4.00  | 0.37  | 6.59E-01 | no |
| L3mbtl        | 0.11  | 0.04  | -1.54 | 6.59E-01 | no |
| Cercam        | 2.87  | 2.18  | -0.40 | 6.60E-01 | no |
| Wisp3         | 1.54  | 1.08  | -0.52 | 6.60E-01 | no |
| Nedd8         | 62.71 | 52.66 | -0.25 | 6.60E-01 | no |
| Psme1         | 46.99 | 54.97 | 0.23  | 6.60E-01 | no |
| Ppp1r10       | 21.60 | 19.00 | -0.19 | 6.60E-01 | no |
| Pdcl          | 22.91 | 19.54 | -0.23 | 6.60E-01 | no |
| 1700029J11Ril | 1.29  | 0.76  | -0.76 | 6.60E-01 | no |
| Stampb        | 8.44  | 10.43 | 0.31  | 6.60E-01 | no |
| Snrpb         | 88.67 | 77.13 | -0.20 | 6.60E-01 | no |
| Ndufb11       | 71.01 | 60.82 | -0.22 | 6.61E-01 | no |
| Arhgdia       | 86.84 | 76.05 | -0.19 | 6.61E-01 | no |
| Paf1          | 28.10 | 24.05 | -0.22 | 6.61E-01 | no |
| Ccdc109a      | 6.87  | 5.29  | -0.38 | 6.61E-01 | no |
| Tctn3         | 4.88  | 6.12  | 0.33  | 6.61E-01 | no |
| Mrpl47        | 16.46 | 12.98 | -0.34 | 6.61E-01 | no |
| Snap23        | 15.75 | 18.78 | 0.25  | 6.61E-01 | no |
| Ccdc50        | 29.46 | 26.04 | -0.18 | 6.61E-01 | no |
| Csdc2         | 0.31  | 0.18  | -0.75 | 6.61E-01 | no |
| Sf3b3         | 57.47 | 50.33 | -0.19 | 6.61E-01 | no |
| Prkrir        | 25.47 | 22.02 | -0.21 | 6.61E-01 | no |
| Wdr78         | 2.06  | 1.56  | -0.40 | 6.62E-01 | no |
| A630007B06Ri  | 7.15  | 5.77  | -0.31 | 6.62E-01 | no |
| Hmgb1-rs17    | 0.02  | 0.26  | 3.44  | 6.62E-01 | no |
| 2210015D19Ri  | 3.16  | 2.36  | -0.42 | 6.62E-01 | no |
| Rg9mtd1       | 18.05 | 14.94 | -0.27 | 6.62E-01 | no |
| Nbea          | 0.03  | 0.06  | 0.88  | 6.62E-01 | no |
| Terf2         | 31.92 | 28.13 | -0.18 | 6.63E-01 | no |
| Zfp667        | 2.66  | 3.43  | 0.36  | 6.63E-01 | no |
| Wdr7          | 6.12  | 7.21  | 0.24  | 6.63E-01 | no |
| Snhg7         | 9.58  | 7.24  | -0.40 | 6.63E-01 | no |
| Capza2        | 64.73 | 56.30 | -0.20 | 6.63E-01 | no |
| Gm5424        | 23.56 | 27.80 | 0.24  | 6.64E-01 | no |
| 4833439L19Ril | 31.96 | 27.65 | -0.21 | 6.64E-01 | no |
| Tnrc6c        | 20.72 | 23.67 | 0.19  | 6.65E-01 | no |
| Mtrr          | 7.41  | 6.09  | -0.28 | 6.65E-01 | no |
| Ankrd44       | 24.88 | 21.70 | -0.20 | 6.65E-01 | no |
| Art3          | 0.03  | 0.16  | 2.60  | 6.66E-01 | no |

|               |       |       |           |          |    |
|---------------|-------|-------|-----------|----------|----|
| Tmem110       | 4.81  | 5.93  | 0.30      | 6.66E-01 | no |
| Caskin2       | 5.23  | 6.28  | 0.26      | 6.66E-01 | no |
| Rnf138        | 13.88 | 16.42 | 0.24      | 6.66E-01 | no |
| Gadd45g       | 2.27  | 1.61  | -0.50     | 6.66E-01 | no |
| Atrip         | 11.58 | 9.58  | -0.27     | 6.66E-01 | no |
| Gata2         | 0.14  | 0.06  | -1.14     | 6.66E-01 | no |
| Uqcrfs1       | 52.82 | 45.40 | -0.22     | 6.66E-01 | no |
| Fam133b       | 21.16 | 17.89 | -0.24     | 6.66E-01 | no |
| 9430023L20Ril | 28.40 | 23.80 | -0.25     | 6.66E-01 | no |
| Hist1h1a      | 4.02  | 2.89  | -0.47     | 6.66E-01 | no |
| Zfp442        | 1.62  | 2.20  | 0.44      | 6.67E-01 | no |
| 2400001E08Ri  | 38.51 | 44.97 | 0.22      | 6.67E-01 | no |
| Ranbp2        | 43.62 | 38.16 | -0.19     | 6.67E-01 | no |
| Gla           | 3.49  | 2.70  | -0.37     | 6.67E-01 | no |
| LOC106740     | 7.03  | 5.29  | -0.41     | 6.67E-01 | no |
| 4930444A02Ri  | 3.13  | 2.44  | -0.36     | 6.67E-01 | no |
| Tifab         | 30.66 | 26.75 | -0.20     | 6.67E-01 | no |
| 4930512B01Ri  | 0.02  | 0.00  | -1.79769e | 6.67E-01 | no |
| Cdkl4         | 0.16  | 0.27  | 0.77      | 6.67E-01 | no |
| Fam55d        | 0.32  | 0.19  | -0.74     | 6.67E-01 | no |
| Echdc2        | 0.17  | 0.36  | 1.07      | 6.67E-01 | no |
| Wdr45l        | 18.74 | 15.81 | -0.25     | 6.67E-01 | no |
| Rnf11         | 11.95 | 14.55 | 0.28      | 6.68E-01 | no |
| Mcf2          | 11.24 | 13.53 | 0.27      | 6.68E-01 | no |
| Gpr162        | 0.10  | 0.19  | 0.93      | 6.68E-01 | no |
| Polr2k        | 8.42  | 6.12  | -0.46     | 6.68E-01 | no |
| Tspan13       | 80.86 | 92.76 | 0.20      | 6.68E-01 | no |
| Fbrs          | 34.10 | 39.20 | 0.20      | 6.68E-01 | no |
| Kdm5c         | 34.70 | 30.42 | -0.19     | 6.69E-01 | no |
| Cmtm4         | 3.29  | 2.41  | -0.45     | 6.69E-01 | no |
| Mc1r          | 0.05  | 0.11  | 1.24      | 6.69E-01 | no |
| Rom1          | 2.31  | 3.13  | 0.44      | 6.69E-01 | no |
| Alkbh6        | 10.22 | 12.99 | 0.35      | 6.69E-01 | no |
| Clec4a1       | 0.28  | 0.48  | 0.81      | 6.69E-01 | no |
| Got2          | 80.33 | 70.43 | -0.19     | 6.69E-01 | no |
| Prune2        | 0.05  | 0.03  | -0.89     | 6.69E-01 | no |
| Wdr45         | 12.14 | 14.80 | 0.29      | 6.69E-01 | no |
| Cyb5r1        | 13.79 | 16.73 | 0.28      | 6.69E-01 | no |
| 2210012G02Ri  | 5.95  | 7.05  | 0.24      | 6.69E-01 | no |
| Fam76a        | 13.73 | 16.06 | 0.23      | 6.69E-01 | no |
| Laptm4a       | 25.26 | 29.53 | 0.23      | 6.69E-01 | no |
| Gtpbp2        | 35.39 | 40.23 | 0.19      | 6.69E-01 | no |

|              |        |        |       |          |    |
|--------------|--------|--------|-------|----------|----|
| Hnrnph2      | 88.94  | 77.97  | -0.19 | 6.69E-01 | no |
| Ranbp3       | 34.52  | 30.01  | -0.20 | 6.69E-01 | no |
| Dapp1        | 14.18  | 11.98  | -0.24 | 6.69E-01 | no |
| Ankrd54      | 20.63  | 17.40  | -0.25 | 6.69E-01 | no |
| Fam18a       | 3.74   | 2.94   | -0.35 | 6.69E-01 | no |
| Lat2         | 4.55   | 3.44   | -0.40 | 6.69E-01 | no |
| Frg1         | 38.88  | 32.90  | -0.24 | 6.70E-01 | no |
| Ly6g5b       | 1.44   | 0.95   | -0.60 | 6.70E-01 | no |
| 6330416G13Ri | 6.22   | 7.54   | 0.28  | 6.70E-01 | no |
| Atg4d        | 15.06  | 12.70  | -0.25 | 6.70E-01 | no |
| H2-M5        | 0.16   | 0.36   | 1.15  | 6.70E-01 | no |
| Gpd1         | 0.35   | 0.52   | 0.58  | 6.70E-01 | no |
| Cdc14b       | 0.58   | 0.81   | 0.48  | 6.70E-01 | no |
| lqce         | 3.96   | 4.85   | 0.29  | 6.70E-01 | no |
| Exoc2        | 17.93  | 20.70  | 0.21  | 6.70E-01 | no |
| Fam172a      | 19.19  | 22.11  | 0.20  | 6.70E-01 | no |
| Vps16        | 24.01  | 20.79  | -0.21 | 6.70E-01 | no |
| Ddx18        | 32.27  | 27.90  | -0.21 | 6.70E-01 | no |
| Pon2         | 22.45  | 18.86  | -0.25 | 6.70E-01 | no |
| Rtcd1        | 21.21  | 17.70  | -0.26 | 6.70E-01 | no |
| Ppil3        | 18.12  | 14.72  | -0.30 | 6.70E-01 | no |
| Itgb2l       | 0.03   | 0.12   | 2.11  | 6.70E-01 | no |
| Snopc3       | 12.46  | 15.35  | 0.30  | 6.70E-01 | no |
| Hsdl2        | 10.33  | 12.44  | 0.27  | 6.70E-01 | no |
| Apobec3      | 106.85 | 122.55 | 0.20  | 6.70E-01 | no |
| Ubqln1       | 47.55  | 42.69  | -0.16 | 6.70E-01 | no |
| Zbtb40       | 8.06   | 6.92   | -0.22 | 6.70E-01 | no |
| Pdp1         | 3.68   | 2.90   | -0.34 | 6.70E-01 | no |
| Dbnnd1       | 1.19   | 1.65   | 0.47  | 6.70E-01 | no |
| Taf12        | 22.80  | 18.89  | -0.27 | 6.70E-01 | no |
| Snx4         | 21.69  | 25.29  | 0.22  | 6.70E-01 | no |
| Gprc5a       | 0.53   | 0.34   | -0.65 | 6.70E-01 | no |
| Map3k1       | 37.46  | 42.79  | 0.19  | 6.70E-01 | no |
| Nudt18       | 3.44   | 4.32   | 0.33  | 6.70E-01 | no |
| BC013529     | 9.55   | 11.92  | 0.32  | 6.70E-01 | no |
| 2310003H01Ri | 8.05   | 9.65   | 0.26  | 6.70E-01 | no |
| Vps33b       | 12.93  | 15.34  | 0.25  | 6.70E-01 | no |
| Mobk13       | 23.11  | 27.00  | 0.22  | 6.70E-01 | no |
| Aph1a        | 39.75  | 44.98  | 0.18  | 6.70E-01 | no |
| Msi2         | 29.48  | 25.80  | -0.19 | 6.70E-01 | no |
| Hira         | 23.74  | 20.71  | -0.20 | 6.70E-01 | no |
| Ndufs2       | 50.34  | 43.71  | -0.20 | 6.70E-01 | no |

|               |        |        |       |          |    |
|---------------|--------|--------|-------|----------|----|
| Nat10         | 18.95  | 16.39  | -0.21 | 6.70E-01 | no |
| Usp42         | 12.08  | 10.39  | -0.22 | 6.70E-01 | no |
| Sike1         | 17.65  | 14.96  | -0.24 | 6.70E-01 | no |
| 1700037H04Ri  | 24.69  | 20.53  | -0.27 | 6.70E-01 | no |
| Ptp4a1        | 5.18   | 4.15   | -0.32 | 6.70E-01 | no |
| Tbkbp1        | 0.49   | 0.34   | -0.55 | 6.70E-01 | no |
| Pdia4         | 37.15  | 32.30  | -0.20 | 6.70E-01 | no |
| Pin1          | 11.12  | 9.39   | -0.24 | 6.70E-01 | no |
| Slc40a1       | 0.45   | 0.65   | 0.54  | 6.71E-01 | no |
| Spo11         | 3.06   | 4.14   | 0.44  | 6.71E-01 | no |
| Synrg         | 16.71  | 18.97  | 0.18  | 6.71E-01 | no |
| Gm13051       | 0.09   | 0.19   | 1.11  | 6.71E-01 | no |
| 1700026L06Ril | 0.41   | 0.09   | -2.12 | 6.71E-01 | no |
| 2900010M23R   | 27.19  | 21.53  | -0.34 | 6.71E-01 | no |
| Rdh13         | 4.59   | 5.72   | 0.32  | 6.72E-01 | no |
| Zbtb44        | 14.48  | 12.72  | -0.19 | 6.72E-01 | no |
| Lsm14b        | 19.70  | 16.79  | -0.23 | 6.73E-01 | no |
| Cldnd1        | 19.43  | 16.17  | -0.26 | 6.73E-01 | no |
| Fam188b       | 0.50   | 0.75   | 0.59  | 6.73E-01 | no |
| Eif5          | 64.90  | 56.93  | -0.19 | 6.73E-01 | no |
| Slc39a1       | 21.33  | 24.86  | 0.22  | 6.73E-01 | no |
| Xpo7          | 10.12  | 8.87   | -0.19 | 6.73E-01 | no |
| Ythdf2        | 27.55  | 24.02  | -0.20 | 6.73E-01 | no |
| Cog4          | 16.49  | 14.02  | -0.23 | 6.73E-01 | no |
| Mrps23        | 26.19  | 21.87  | -0.26 | 6.73E-01 | no |
| 2410042D21Ri  | 9.33   | 7.60   | -0.30 | 6.73E-01 | no |
| Kank2         | 2.59   | 2.05   | -0.34 | 6.73E-01 | no |
| Scrn2         | 7.02   | 8.81   | 0.33  | 6.74E-01 | no |
| Lrrc8c        | 19.58  | 22.76  | 0.22  | 6.74E-01 | no |
| Gnb2l1        | 284.72 | 249.80 | -0.19 | 6.74E-01 | no |
| Apbb1ip       | 35.66  | 31.01  | -0.20 | 6.74E-01 | no |
| Hdgfrp2       | 28.34  | 24.56  | -0.21 | 6.74E-01 | no |
| Hist2h2ac     | 1.71   | 0.97   | -0.82 | 6.75E-01 | no |
| Bid           | 17.80  | 21.04  | 0.24  | 6.75E-01 | no |
| Ccnk          | 29.35  | 25.44  | -0.21 | 6.75E-01 | no |
| Mpzl3         | 1.35   | 1.98   | 0.55  | 6.75E-01 | no |
| H2-Q1         | 2.67   | 3.51   | 0.39  | 6.75E-01 | no |
| Rps25         | 70.15  | 59.79  | -0.23 | 6.75E-01 | no |
| Dnajc11       | 20.43  | 17.60  | -0.21 | 6.76E-01 | no |
| Kpna6         | 17.84  | 15.55  | -0.20 | 6.76E-01 | no |
| Gfra2         | 37.44  | 32.51  | -0.20 | 6.76E-01 | no |
| Zfp112        | 0.23   | 0.35   | 0.61  | 6.77E-01 | no |



|              |       |       |           |          |    |
|--------------|-------|-------|-----------|----------|----|
| Parp16       | 4.29  | 5.43  | 0.34      | 6.77E-01 | no |
| Gm5801       | 44.35 | 38.69 | -0.20     | 6.77E-01 | no |
| Mier3        | 22.34 | 19.44 | -0.20     | 6.77E-01 | no |
| Tysnd1       | 22.23 | 19.03 | -0.22     | 6.77E-01 | no |
| Ccdc43       | 15.40 | 12.86 | -0.26     | 6.77E-01 | no |
| Zfp428       | 15.01 | 12.15 | -0.31     | 6.77E-01 | no |
| D130040H23R  | 3.37  | 4.40  | 0.38      | 6.77E-01 | no |
| Atp5h        | 73.43 | 62.19 | -0.24     | 6.77E-01 | no |
| Tmem69       | 12.52 | 10.32 | -0.28     | 6.77E-01 | no |
| Prps2        | 47.11 | 41.31 | -0.19     | 6.77E-01 | no |
| Sigmar1      | 14.72 | 12.08 | -0.29     | 6.77E-01 | no |
| S100pbp      | 18.69 | 15.49 | -0.27     | 6.78E-01 | no |
| Snx25        | 16.24 | 13.85 | -0.23     | 6.78E-01 | no |
| Hist2h3b     | 1.12  | 0.56  | -1.00     | 6.78E-01 | no |
| Tdrd9        | 0.01  | 0.08  | 3.35      | 6.78E-01 | no |
| Maml1        | 15.03 | 17.26 | 0.20      | 6.78E-01 | no |
| Sik2         | 10.08 | 8.47  | -0.25     | 6.78E-01 | no |
| Magoh        | 52.37 | 43.44 | -0.27     | 6.78E-01 | no |
| Gm14420      | 0.12  | 0.21  | 0.74      | 6.79E-01 | no |
| Zfp827       | 4.90  | 5.77  | 0.24      | 6.79E-01 | no |
| Clptm1       | 19.58 | 17.00 | -0.20     | 6.79E-01 | no |
| Zfp106       | 32.42 | 28.50 | -0.19     | 6.79E-01 | no |
| Ripk1        | 11.84 | 13.77 | 0.22      | 6.79E-01 | no |
| Ganab        | 52.66 | 46.29 | -0.19     | 6.79E-01 | no |
| Zfp397       | 22.36 | 19.53 | -0.20     | 6.79E-01 | no |
| Elac2        | 13.34 | 11.26 | -0.24     | 6.79E-01 | no |
| Gm5176       | 0.40  | 0.84  | 1.06      | 6.80E-01 | no |
| Tmem38b      | 1.48  | 1.99  | 0.43      | 6.80E-01 | no |
| Slc39a13     | 5.19  | 6.49  | 0.32      | 6.80E-01 | no |
| Pick1        | 8.37  | 10.17 | 0.28      | 6.80E-01 | no |
| BC002230     | 10.35 | 12.13 | 0.23      | 6.80E-01 | no |
| Lrwd1        | 28.73 | 24.82 | -0.21     | 6.80E-01 | no |
| Cd47         | 49.42 | 42.94 | -0.20     | 6.80E-01 | no |
| Slc35d1      | 4.61  | 3.62  | -0.35     | 6.80E-01 | no |
| Vamp3        | 25.91 | 22.10 | -0.23     | 6.80E-01 | no |
| C030030A07Ri | 0.44  | 0.27  | -0.73     | 6.80E-01 | no |
| Fam150b      | 0.02  | 0.00  | -1.79769e | 6.80E-01 | no |
| 1700012L04Ri | 0.07  | 0.00  | -1.79769e | 6.80E-01 | no |
| 1700071K01Ri | 0.03  | 0.00  | -1.79769e | 6.80E-01 | no |
| 4930488L21Ri | 0.02  | 0.00  | -1.79769e | 6.80E-01 | no |
| Calml4       | 0.05  | 0.00  | -1.79769e | 6.80E-01 | no |
| Ces2c        | 0.02  | 0.00  | -1.79769e | 6.80E-01 | no |

|              |       |       |           |          |    |
|--------------|-------|-------|-----------|----------|----|
| Ces2d-ps     | 0.02  | 0.00  | -1.79769e | 6.80E-01 | no |
| Cldn22       | 0.04  | 0.00  | -1.79769e | 6.80E-01 | no |
| Cldn24       | 0.05  | 0.00  | -1.79769e | 6.80E-01 | no |
| Ear1         | 0.05  | 0.00  | -1.79769e | 6.80E-01 | no |
| Gabrr1       | 0.02  | 0.00  | -1.79769e | 6.80E-01 | no |
| Gm14920      | 0.11  | 0.00  | -1.79769e | 6.80E-01 | no |
| Gm15070      | 0.01  | 0.00  | -1.79769e | 6.80E-01 | no |
| Gm6762       | 0.03  | 0.00  | -1.79769e | 6.80E-01 | no |
| Opn1sw       | 0.01  | 0.00  | -1.79769e | 6.80E-01 | no |
| Tcfl5        | 0.02  | 0.00  | -1.79769e | 6.80E-01 | no |
| Rpgrip1      | 4.92  | 16.36 | 1.73      | 6.80E-01 | no |
| AF251705     | 0.20  | 0.39  | 0.98      | 6.80E-01 | no |
| Slc22a12     | 0.12  | 0.23  | 0.91      | 6.80E-01 | no |
| Dguok        | 16.76 | 20.29 | 0.28      | 6.80E-01 | no |
| Ep300        | 29.63 | 26.05 | -0.19     | 6.80E-01 | no |
| Trim27       | 40.03 | 34.96 | -0.20     | 6.80E-01 | no |
| Zfp146       | 31.66 | 27.34 | -0.21     | 6.80E-01 | no |
| Bckdk        | 17.69 | 15.14 | -0.23     | 6.80E-01 | no |
| Ebna1bp2     | 16.86 | 14.38 | -0.23     | 6.80E-01 | no |
| Gins4        | 24.25 | 20.33 | -0.25     | 6.80E-01 | no |
| Rpp14        | 14.94 | 12.52 | -0.26     | 6.80E-01 | no |
| Scd4         | 0.83  | 0.59  | -0.50     | 6.80E-01 | no |
| Cmpk1        | 54.38 | 47.33 | -0.20     | 6.80E-01 | no |
| Fgf1         | 0.13  | 0.22  | 0.75      | 6.81E-01 | no |
| Zfp618       | 0.08  | 0.03  | -1.61     | 6.81E-01 | no |
| Sec11c       | 51.31 | 43.39 | -0.24     | 6.81E-01 | no |
| Tcp11        | 0.12  | 0.27  | 1.16      | 6.81E-01 | no |
| Mrps18c      | 28.35 | 22.47 | -0.34     | 6.81E-01 | no |
| Slc41a2      | 0.10  | 0.18  | 0.81      | 6.82E-01 | no |
| Wdr6         | 36.87 | 41.95 | 0.19      | 6.82E-01 | no |
| Plagl2       | 26.35 | 23.11 | -0.19     | 6.82E-01 | no |
| Hgd          | 0.22  | 0.09  | -1.37     | 6.82E-01 | no |
| Slc50a1      | 23.12 | 27.84 | 0.27      | 6.82E-01 | no |
| Srp9         | 49.94 | 43.07 | -0.21     | 6.82E-01 | no |
| Nhedc1       | 0.24  | 0.12  | -0.99     | 6.82E-01 | no |
| Sez6l2       | 0.93  | 0.68  | -0.46     | 6.82E-01 | no |
| Frrs1        | 1.73  | 2.30  | 0.41      | 6.82E-01 | no |
| Xpo5         | 20.79 | 18.04 | -0.20     | 6.82E-01 | no |
| Hspa12b      | 2.37  | 3.07  | 0.37      | 6.83E-01 | no |
| Ppp2r5e      | 23.81 | 20.82 | -0.19     | 6.83E-01 | no |
| 6430531B16Ri | 0.06  | 0.21  | 1.79      | 6.83E-01 | no |
| Lancl1       | 7.64  | 9.11  | 0.25      | 6.83E-01 | no |

|              |       |       |       |          |    |
|--------------|-------|-------|-------|----------|----|
| St6galnac4   | 8.59  | 10.10 | 0.23  | 6.83E-01 | no |
| Nmt1         | 33.86 | 29.30 | -0.21 | 6.83E-01 | no |
| Gm1943       | 7.86  | 6.09  | -0.37 | 6.83E-01 | no |
| Vmn1r32      | 0.21  | 0.10  | -1.05 | 6.83E-01 | no |
| Arhgef26     | 0.02  | 0.06  | 2.06  | 6.83E-01 | no |
| Ptges2       | 6.14  | 4.85  | -0.34 | 6.83E-01 | no |
| Fip1l1       | 31.45 | 27.52 | -0.19 | 6.84E-01 | no |
| 0610007C21Ri | 13.94 | 17.32 | 0.31  | 6.84E-01 | no |
| Fbxw2        | 36.13 | 32.42 | -0.16 | 6.84E-01 | no |
| Matr3        | 50.74 | 44.67 | -0.18 | 6.84E-01 | no |
| Pik3c2a      | 13.79 | 12.03 | -0.20 | 6.84E-01 | no |
| Chd1l        | 13.50 | 11.47 | -0.24 | 6.84E-01 | no |
| 9030617O03Ri | 2.32  | 2.99  | 0.36  | 6.84E-01 | no |
| 2610507B11Ri | 37.29 | 32.84 | -0.18 | 6.84E-01 | no |
| Amz2         | 10.75 | 8.94  | -0.27 | 6.84E-01 | no |
| Sigirr       | 20.49 | 23.97 | 0.23  | 6.84E-01 | no |
| Pmpca        | 33.70 | 29.47 | -0.19 | 6.84E-01 | no |
| Znhit2-ps    | 13.88 | 11.27 | -0.30 | 6.84E-01 | no |
| Dph1         | 8.18  | 6.60  | -0.31 | 6.84E-01 | no |
| Lzic         | 18.61 | 15.65 | -0.25 | 6.84E-01 | no |
| Slc4a1ap     | 14.34 | 12.12 | -0.24 | 6.85E-01 | no |
| 9130401M01R  | 10.72 | 8.58  | -0.32 | 6.85E-01 | no |
| 3110070M22R  | 0.36  | 0.17  | -1.11 | 6.85E-01 | no |
| Agpat4       | 2.44  | 3.23  | 0.40  | 6.85E-01 | no |
| Vma21        | 14.93 | 12.74 | -0.23 | 6.85E-01 | no |
| Rhbdd3       | 9.24  | 7.46  | -0.31 | 6.85E-01 | no |
| Gpatch8      | 21.35 | 18.76 | -0.19 | 6.85E-01 | no |
| Mll1         | 35.70 | 41.13 | 0.20  | 6.85E-01 | no |
| Zfp629       | 8.59  | 9.94  | 0.21  | 6.85E-01 | no |
| Yme1l1       | 35.23 | 30.87 | -0.19 | 6.85E-01 | no |
| Flywch1      | 14.26 | 12.07 | -0.24 | 6.85E-01 | no |
| Cdc5l        | 8.97  | 7.45  | -0.27 | 6.85E-01 | no |
| Ndufb6       | 40.75 | 33.15 | -0.30 | 6.85E-01 | no |
| Mrc1         | 0.35  | 0.48  | 0.49  | 6.85E-01 | no |
| Rxra         | 2.72  | 3.36  | 0.31  | 6.85E-01 | no |
| Slc25a43     | 0.07  | 0.29  | 2.04  | 6.86E-01 | no |
| Psmg3        | 24.11 | 19.69 | -0.29 | 6.86E-01 | no |
| 1300017J02Ri | 0.13  | 0.03  | -2.07 | 6.86E-01 | no |
| Enc1         | 3.41  | 2.74  | -0.32 | 6.87E-01 | no |
| Ltb4r1       | 0.57  | 0.33  | -0.78 | 6.87E-01 | no |
| Zmiz2        | 42.59 | 47.01 | 0.14  | 6.87E-01 | no |
| Ttyh3        | 44.07 | 38.76 | -0.19 | 6.87E-01 | no |

|               |        |        |       |          |    |
|---------------|--------|--------|-------|----------|----|
| 4921531C22Ri  | 2.81   | 3.68   | 0.39  | 6.87E-01 | no |
| Cd81          | 54.60  | 47.50  | -0.20 | 6.87E-01 | no |
| Pgam5         | 25.92  | 22.44  | -0.21 | 6.87E-01 | no |
| Wdr46         | 19.75  | 16.90  | -0.22 | 6.87E-01 | no |
| B930059L03Ri  | 0.36   | 0.61   | 0.74  | 6.87E-01 | no |
| Usp30         | 7.17   | 8.67   | 0.27  | 6.87E-01 | no |
| U2af2         | 134.41 | 118.41 | -0.18 | 6.87E-01 | no |
| 2810046L04Ril | 24.57  | 21.48  | -0.19 | 6.87E-01 | no |
| Gfer          | 11.12  | 9.08   | -0.29 | 6.87E-01 | no |
| 6330549D23Ri  | 7.00   | 5.67   | -0.30 | 6.87E-01 | no |
| Sh3pxd2b      | 0.10   | 0.06   | -0.71 | 6.87E-01 | no |
| Mtus2         | 0.16   | 0.23   | 0.52  | 6.87E-01 | no |
| Rab28         | 16.82  | 13.90  | -0.28 | 6.87E-01 | no |
| Mtmr11        | 0.86   | 0.61   | -0.49 | 6.87E-01 | no |
| Acd           | 28.91  | 33.64  | 0.22  | 6.88E-01 | no |
| Fam83g        | 0.11   | 0.17   | 0.66  | 6.88E-01 | no |
| Fbxl19        | 15.03  | 17.35  | 0.21  | 6.88E-01 | no |
| Nacc1         | 49.56  | 43.72  | -0.18 | 6.88E-01 | no |
| Rpl10a        | 460.19 | 404.91 | -0.18 | 6.88E-01 | no |
| Mif           | 234.30 | 205.98 | -0.19 | 6.88E-01 | no |
| Gnl3          | 33.55  | 29.01  | -0.21 | 6.88E-01 | no |
| Diablo        | 25.64  | 21.91  | -0.23 | 6.88E-01 | no |
| Dohh          | 25.19  | 21.37  | -0.24 | 6.88E-01 | no |
| Brwd3         | 6.22   | 5.27   | -0.24 | 6.88E-01 | no |
| Fut11         | 10.20  | 8.52   | -0.26 | 6.88E-01 | no |
| Zswim1        | 4.88   | 3.88   | -0.33 | 6.88E-01 | no |
| Poldip3       | 45.02  | 39.61  | -0.18 | 6.88E-01 | no |
| Ifitm3        | 12.05  | 15.51  | 0.36  | 6.88E-01 | no |
| Cyfp2         | 106.17 | 92.70  | -0.20 | 6.88E-01 | no |
| Mxi1          | 9.48   | 8.12   | -0.22 | 6.88E-01 | no |
| Ppa1          | 29.52  | 24.93  | -0.24 | 6.88E-01 | no |
| Zfand2a       | 8.55   | 7.14   | -0.26 | 6.88E-01 | no |
| Mrpl4         | 20.85  | 17.37  | -0.26 | 6.88E-01 | no |
| Adal          | 10.00  | 8.18   | -0.29 | 6.88E-01 | no |
| Apba3         | 9.29   | 11.20  | 0.27  | 6.89E-01 | no |
| Rc3h1         | 17.38  | 15.29  | -0.18 | 6.89E-01 | no |
| Naa40         | 39.11  | 34.37  | -0.19 | 6.89E-01 | no |
| Zfp345        | 0.06   | 0.13   | 1.28  | 6.90E-01 | no |
| Irak3         | 6.13   | 7.46   | 0.28  | 6.90E-01 | no |
| Btnl7         | 0.13   | 0.25   | 0.97  | 6.90E-01 | no |
| Prmt1         | 53.16  | 46.20  | -0.20 | 6.90E-01 | no |
| Eif1b         | 33.43  | 27.94  | -0.26 | 6.90E-01 | no |

|              |        |        |       |          |    |
|--------------|--------|--------|-------|----------|----|
| A030009H04R  | 4.93   | 6.28   | 0.35  | 6.90E-01 | no |
| Tmem222      | 19.78  | 23.45  | 0.25  | 6.90E-01 | no |
| Cmpk2        | 11.01  | 9.25   | -0.25 | 6.90E-01 | no |
| Rasgrf1      | 0.08   | 0.02   | -2.15 | 6.90E-01 | no |
| Efcab4a      | 0.16   | 0.04   | -2.07 | 6.90E-01 | no |
| Mcc          | 0.02   | 0.04   | 1.39  | 6.91E-01 | no |
| Duox2        | 0.03   | 0.07   | 1.38  | 6.91E-01 | no |
| Rapsn        | 0.14   | 0.29   | 1.02  | 6.91E-01 | no |
| Igdcc4       | 0.06   | 0.10   | 0.81  | 6.91E-01 | no |
| Papss1       | 11.88  | 14.05  | 0.24  | 6.91E-01 | no |
| Nr1h2        | 39.00  | 44.58  | 0.19  | 6.91E-01 | no |
| Rbm12        | 36.11  | 32.19  | -0.17 | 6.91E-01 | no |
| Ptprc        | 47.60  | 42.13  | -0.18 | 6.91E-01 | no |
| Ccdc97       | 41.70  | 36.67  | -0.19 | 6.91E-01 | no |
| Crlf3        | 45.13  | 39.52  | -0.19 | 6.91E-01 | no |
| Arf4         | 45.37  | 39.52  | -0.20 | 6.91E-01 | no |
| Fam102b      | 7.75   | 6.58   | -0.24 | 6.91E-01 | no |
| Atg9a        | 8.84   | 10.40  | 0.24  | 6.91E-01 | no |
| Aco2         | 48.02  | 42.27  | -0.18 | 6.91E-01 | no |
| 4930562C15Ri | 0.12   | 0.06   | -0.96 | 6.91E-01 | no |
| Tmem202      | 0.08   | 0.27   | 1.78  | 6.91E-01 | no |
| ldh3b        | 42.24  | 36.62  | -0.21 | 6.91E-01 | no |
| Mau2         | 25.24  | 28.24  | 0.16  | 6.91E-01 | no |
| Myb          | 142.63 | 129.90 | -0.13 | 6.91E-01 | no |
| Fbxo34       | 13.35  | 11.59  | -0.20 | 6.91E-01 | no |
| Prps1        | 32.88  | 28.40  | -0.21 | 6.91E-01 | no |
| 0610010F05Ri | 8.47   | 7.09   | -0.26 | 6.92E-01 | no |
| Prkaa1       | 10.20  | 8.66   | -0.24 | 6.92E-01 | no |
| C3           | 1.63   | 1.27   | -0.36 | 6.92E-01 | no |
| Dusp18       | 0.03   | 0.07   | 1.50  | 6.92E-01 | no |
| Noc3l        | 9.74   | 8.23   | -0.24 | 6.92E-01 | no |
| Gm4535       | 9.17   | 5.78   | -0.67 | 6.92E-01 | no |
| Ly6k         | 0.55   | 0.94   | 0.76  | 6.92E-01 | no |
| LOC620419    | 3.57   | 4.57   | 0.36  | 6.92E-01 | no |
| Gm15319      | 0.15   | 0.04   | -2.03 | 6.92E-01 | no |
| Serpinb6a    | 7.01   | 8.82   | 0.33  | 6.92E-01 | no |
| 5730403B10Ri | 24.08  | 21.04  | -0.19 | 6.92E-01 | no |
| Mark3        | 27.43  | 24.35  | -0.17 | 6.92E-01 | no |
| Zfat         | 3.21   | 2.60   | -0.30 | 6.92E-01 | no |
| Coq7         | 23.44  | 19.17  | -0.29 | 6.93E-01 | no |
| Zfp317       | 13.38  | 15.52  | 0.21  | 6.93E-01 | no |
| Cyb5d2       | 2.67   | 2.04   | -0.39 | 6.93E-01 | no |

|              |       |       |       |          |    |
|--------------|-------|-------|-------|----------|----|
| 1110054O05Ri | 25.17 | 21.92 | -0.20 | 6.93E-01 | no |
| Cdc16        | 26.15 | 22.56 | -0.21 | 6.93E-01 | no |
| Smn1         | 21.49 | 17.87 | -0.27 | 6.93E-01 | no |
| Zfp945       | 4.78  | 5.69  | 0.25  | 6.93E-01 | no |
| Zcchc10      | 12.71 | 10.19 | -0.32 | 6.93E-01 | no |
| Haus3        | 33.68 | 29.08 | -0.21 | 6.93E-01 | no |
| Snx11        | 13.47 | 11.46 | -0.23 | 6.94E-01 | no |
| Xpot         | 18.69 | 16.40 | -0.19 | 6.94E-01 | no |
| Svep1        | 0.05  | 0.03  | -0.91 | 6.94E-01 | no |
| Eif6         | 37.32 | 32.28 | -0.21 | 6.94E-01 | no |
| BC068281     | 5.25  | 4.24  | -0.31 | 6.94E-01 | no |
| Gpkow        | 19.56 | 17.00 | -0.20 | 6.94E-01 | no |
| Tmem44       | 0.08  | 0.14  | 0.83  | 6.94E-01 | no |
| Ifit1        | 1.37  | 1.85  | 0.44  | 6.94E-01 | no |
| Tprn         | 7.05  | 8.48  | 0.27  | 6.94E-01 | no |
| Taf5l        | 25.13 | 28.76 | 0.19  | 6.94E-01 | no |
| Pkn3         | 1.75  | 1.33  | -0.39 | 6.94E-01 | no |
| Ccdc112      | 0.41  | 0.59  | 0.53  | 6.94E-01 | no |
| Reep4        | 34.70 | 29.71 | -0.22 | 6.95E-01 | no |
| Htr2b        | 0.09  | 0.21  | 1.30  | 6.95E-01 | no |
| Zfp40        | 4.21  | 5.18  | 0.30  | 6.95E-01 | no |
| Rps8         | 5.14  | 3.81  | -0.43 | 6.95E-01 | no |
| Dad1         | 56.62 | 48.22 | -0.23 | 6.96E-01 | no |
| Zfp180       | 14.65 | 12.61 | -0.22 | 6.96E-01 | no |
| Plxdc2       | 0.70  | 0.97  | 0.48  | 6.96E-01 | no |
| 5430411K18Ri | 9.64  | 10.99 | 0.19  | 6.96E-01 | no |
| Rhd          | 0.76  | 0.50  | -0.59 | 6.97E-01 | no |
| Spink10      | 0.26  | 0.11  | -1.20 | 6.97E-01 | no |
| Secisbp2l    | 12.18 | 13.92 | 0.19  | 6.97E-01 | no |
| Fbxo3        | 30.62 | 26.69 | -0.20 | 6.97E-01 | no |
| Lcor         | 5.34  | 4.39  | -0.28 | 6.97E-01 | no |
| Ifi204       | 6.02  | 7.43  | 0.31  | 6.97E-01 | no |
| Dynll2       | 38.13 | 33.59 | -0.18 | 6.97E-01 | no |
| Rps27l       | 65.75 | 55.04 | -0.26 | 6.97E-01 | no |
| Ccbl2        | 4.46  | 3.50  | -0.35 | 6.98E-01 | no |
| Mageh1       | 0.32  | 0.53  | 0.73  | 6.98E-01 | no |
| Afmid        | 3.90  | 4.91  | 0.33  | 6.98E-01 | no |
| Ptov1        | 17.37 | 20.42 | 0.23  | 6.98E-01 | no |
| Ubxn4        | 20.16 | 23.03 | 0.19  | 6.98E-01 | no |
| Hes6         | 64.62 | 56.70 | -0.19 | 6.98E-01 | no |
| Bend3        | 6.76  | 5.76  | -0.23 | 6.98E-01 | no |
| AA986860     | 0.32  | 0.20  | -0.64 | 6.98E-01 | no |

|              |        |       |       |          |    |
|--------------|--------|-------|-------|----------|----|
| Nek8         | 5.95   | 7.24  | 0.28  | 6.98E-01 | no |
| BC005561     | 7.09   | 5.98  | -0.25 | 6.98E-01 | no |
| Fos          | 0.44   | 0.65  | 0.56  | 6.98E-01 | no |
| Ndufb7       | 53.29  | 44.82 | -0.25 | 6.98E-01 | no |
| Atp5sl       | 17.15  | 14.66 | -0.23 | 6.99E-01 | no |
| Dleu7        | 2.14   | 2.91  | 0.44  | 6.99E-01 | no |
| Grpel2       | 9.18   | 10.79 | 0.23  | 6.99E-01 | no |
| Wbp1         | 29.30  | 25.28 | -0.21 | 6.99E-01 | no |
| Ikzf2        | 0.50   | 0.67  | 0.43  | 6.99E-01 | no |
| P2ry10       | 2.01   | 2.68  | 0.42  | 6.99E-01 | no |
| Slc16a13     | 2.46   | 3.17  | 0.37  | 6.99E-01 | no |
| Bphl         | 7.86   | 9.87  | 0.33  | 6.99E-01 | no |
| Txndc5       | 30.70  | 26.86 | -0.19 | 6.99E-01 | no |
| Armc8        | 13.47  | 11.76 | -0.20 | 6.99E-01 | no |
| Samm50       | 37.63  | 32.70 | -0.20 | 6.99E-01 | no |
| Gmcl1        | 21.57  | 18.66 | -0.21 | 6.99E-01 | no |
| Sec22b       | 25.48  | 21.75 | -0.23 | 6.99E-01 | no |
| Commd1       | 32.67  | 27.30 | -0.26 | 6.99E-01 | no |
| Apex2        | 9.92   | 8.11  | -0.29 | 6.99E-01 | no |
| Htr2a        | 0.05   | 0.12  | 1.36  | 6.99E-01 | no |
| Ctrl         | 1.51   | 1.01  | -0.59 | 6.99E-01 | no |
| Smarce1      | 46.26  | 40.80 | -0.18 | 7.00E-01 | no |
| Atoh1        | 0.04   | 0.14  | 1.76  | 7.00E-01 | no |
| 1700021C14Ri | 3.27   | 2.24  | -0.55 | 7.00E-01 | no |
| Aicda        | 0.14   | 0.03  | -2.00 | 7.00E-01 | no |
| Hnrnpa0      | 105.88 | 93.68 | -0.18 | 7.00E-01 | no |
| Atxn7        | 13.51  | 15.42 | 0.19  | 7.00E-01 | no |
| Pld3         | 6.38   | 7.83  | 0.29  | 7.00E-01 | no |
| Znrf3        | 1.80   | 1.43  | -0.33 | 7.00E-01 | no |
| Id3          | 39.74  | 33.88 | -0.23 | 7.00E-01 | no |
| Dffb         | 12.04  | 10.01 | -0.27 | 7.00E-01 | no |
| Zfp354b      | 2.33   | 1.78  | -0.39 | 7.01E-01 | no |
| Snrpa        | 56.65  | 50.13 | -0.18 | 7.01E-01 | no |
| Vcp          | 78.14  | 69.10 | -0.18 | 7.01E-01 | no |
| Vps25        | 38.29  | 32.68 | -0.23 | 7.01E-01 | no |
| Rpl22l1      | 82.97  | 70.27 | -0.24 | 7.01E-01 | no |
| Arhgdig      | 0.40   | 0.19  | -1.05 | 7.01E-01 | no |
| Speer2       | 1.71   | 1.20  | -0.52 | 7.01E-01 | no |
| Atxn2l       | 60.21  | 53.27 | -0.18 | 7.01E-01 | no |
| Kif9         | 0.54   | 0.78  | 0.53  | 7.01E-01 | no |
| Dleu2        | 7.94   | 6.32  | -0.33 | 7.02E-01 | no |
| Tlr9         | 7.80   | 6.50  | -0.26 | 7.02E-01 | no |

|               |        |       |       |          |    |
|---------------|--------|-------|-------|----------|----|
| Hist1h3a      | 1.36   | 0.83  | -0.71 | 7.02E-01 | no |
| Cd248         | 0.06   | 0.14  | 1.29  | 7.02E-01 | no |
| Tbk1          | 18.99  | 21.85 | 0.20  | 7.02E-01 | no |
| 4921524J17RiI | 17.97  | 14.96 | -0.26 | 7.02E-01 | no |
| Zfp811        | 0.14   | 0.04  | -2.03 | 7.02E-01 | no |
| Fbxo42        | 15.62  | 13.69 | -0.19 | 7.02E-01 | no |
| Elk3          | 17.49  | 15.18 | -0.20 | 7.02E-01 | no |
| Mtmr9         | 22.90  | 19.80 | -0.21 | 7.02E-01 | no |
| Serpine3      | 0.39   | 0.22  | -0.82 | 7.02E-01 | no |
| Abtb2         | 2.29   | 1.82  | -0.34 | 7.02E-01 | no |
| Ehmt1         | 24.12  | 21.77 | -0.15 | 7.02E-01 | no |
| Pno1          | 20.00  | 16.78 | -0.25 | 7.02E-01 | no |
| Kirrel2       | 0.13   | 0.07  | -0.95 | 7.02E-01 | no |
| Zfp61         | 6.54   | 7.97  | 0.29  | 7.02E-01 | no |
| Amigo3        | 3.45   | 4.35  | 0.33  | 7.03E-01 | no |
| Eefsec        | 16.15  | 13.86 | -0.22 | 7.03E-01 | no |
| Pex5          | 17.67  | 20.13 | 0.19  | 7.03E-01 | no |
| Psmd8         | 51.66  | 45.24 | -0.19 | 7.03E-01 | no |
| 4930452B06Ri  | 0.33   | 0.49  | 0.56  | 7.03E-01 | no |
| Glyctk        | 4.41   | 5.32  | 0.27  | 7.03E-01 | no |
| Siah2         | 7.47   | 6.10  | -0.29 | 7.03E-01 | no |
| Med27         | 12.89  | 10.46 | -0.30 | 7.03E-01 | no |
| Fdxacb1       | 7.27   | 5.83  | -0.32 | 7.03E-01 | no |
| D330041H03R   | 8.33   | 6.64  | -0.33 | 7.03E-01 | no |
| Upk1a         | 0.39   | 0.20  | -0.94 | 7.03E-01 | no |
| Gm6607        | 0.42   | 0.14  | -1.57 | 7.03E-01 | no |
| Zfp943        | 10.27  | 12.26 | 0.26  | 7.04E-01 | no |
| Slc43a3       | 49.55  | 43.69 | -0.18 | 7.04E-01 | no |
| Gtf2h5        | 24.02  | 19.97 | -0.27 | 7.04E-01 | no |
| Klc1          | 29.15  | 26.00 | -0.16 | 7.04E-01 | no |
| Gdi2          | 100.42 | 88.89 | -0.18 | 7.04E-01 | no |
| Rwdd1         | 30.30  | 25.63 | -0.24 | 7.04E-01 | no |
| Trappc6b      | 18.12  | 14.98 | -0.28 | 7.04E-01 | no |
| Ifi205        | 7.96   | 9.83  | 0.30  | 7.05E-01 | no |
| Slpi          | 1.72   | 1.20  | -0.53 | 7.05E-01 | no |
| 0610007P14Ri  | 24.04  | 19.98 | -0.27 | 7.05E-01 | no |
| Stard3        | 15.54  | 18.23 | 0.23  | 7.05E-01 | no |
| Rpl7          | 94.53  | 82.91 | -0.19 | 7.05E-01 | no |
| Zfp541        | 0.05   | 0.02  | -1.43 | 7.05E-01 | no |
| D730039F16Ri  | 0.13   | 0.03  | -2.01 | 7.05E-01 | no |
| 4921523A10Ri  | 0.04   | 0.14  | 1.69  | 7.06E-01 | no |
| N4bp1         | 13.08  | 14.90 | 0.19  | 7.06E-01 | no |



|               |        |        |       |          |    |
|---------------|--------|--------|-------|----------|----|
| Pkig          | 95.29  | 104.83 | 0.14  | 7.06E-01 | no |
| Kcnh8         | 0.24   | 0.12   | -0.94 | 7.06E-01 | no |
| Prickle3      | 9.17   | 10.96  | 0.26  | 7.06E-01 | no |
| Pabpn1l       | 0.09   | 0.25   | 1.45  | 7.06E-01 | no |
| Chmp4b        | 38.59  | 44.12  | 0.19  | 7.06E-01 | no |
| E430025E21Ri  | 19.18  | 21.87  | 0.19  | 7.06E-01 | no |
| Zfp668        | 11.34  | 9.67   | -0.23 | 7.06E-01 | no |
| Pla2g3        | 0.16   | 0.26   | 0.73  | 7.06E-01 | no |
| 9130011E15Ri  | 6.66   | 5.45   | -0.29 | 7.06E-01 | no |
| 2310003L22Ril | 3.67   | 2.88   | -0.35 | 7.06E-01 | no |
| Cysltr1       | 0.72   | 1.02   | 0.51  | 7.06E-01 | no |
| Srsf5         | 166.81 | 152.50 | -0.13 | 7.06E-01 | no |
| Tcof1         | 36.50  | 33.10  | -0.14 | 7.06E-01 | no |
| Dph3          | 11.22  | 9.50   | -0.24 | 7.06E-01 | no |
| Zdhhc16       | 18.74  | 15.83  | -0.24 | 7.06E-01 | no |
| Prune         | 8.51   | 10.09  | 0.25  | 7.06E-01 | no |
| Lmo3          | 0.16   | 0.06   | -1.47 | 7.06E-01 | no |
| S100a13       | 14.61  | 18.24  | 0.32  | 7.06E-01 | no |
| Rnh1          | 33.51  | 29.53  | -0.18 | 7.06E-01 | no |
| Atg16l1       | 11.90  | 10.14  | -0.23 | 7.06E-01 | no |
| Stam          | 12.31  | 10.48  | -0.23 | 7.06E-01 | no |
| Aplf          | 5.41   | 4.47   | -0.28 | 7.06E-01 | no |
| L3mbtl3       | 11.64  | 9.94   | -0.23 | 7.07E-01 | no |
| Map2k5        | 13.68  | 16.11  | 0.24  | 7.07E-01 | no |
| Ldhal6b       | 1.15   | 1.59   | 0.47  | 7.07E-01 | no |
| Slc25a22      | 15.29  | 17.72  | 0.21  | 7.07E-01 | no |
| Prpsap1       | 27.44  | 23.69  | -0.21 | 7.07E-01 | no |
| Dennd4a       | 13.80  | 12.16  | -0.18 | 7.07E-01 | no |
| Rpf1          | 27.79  | 23.72  | -0.23 | 7.07E-01 | no |
| Tnni3         | 0.34   | 0.62   | 0.88  | 7.07E-01 | no |
| Dio2          | 1.60   | 2.03   | 0.34  | 7.07E-01 | no |
| Irgm1         | 24.05  | 27.71  | 0.20  | 7.07E-01 | no |
| Pyroxd1       | 8.10   | 6.60   | -0.30 | 7.07E-01 | no |
| Ep400         | 39.97  | 36.22  | -0.14 | 7.07E-01 | no |
| Cdkn2aip      | 14.49  | 12.43  | -0.22 | 7.07E-01 | no |
| Serpina3n     | 0.14   | 0.26   | 0.87  | 7.07E-01 | no |
| Klrb1f        | 1.66   | 2.29   | 0.46  | 7.07E-01 | no |
| Pla2g12a      | 25.51  | 29.64  | 0.22  | 7.07E-01 | no |
| Tmppe         | 8.40   | 9.66   | 0.20  | 7.07E-01 | no |
| Hcls1         | 45.16  | 51.18  | 0.18  | 7.07E-01 | no |
| Dock2         | 34.00  | 38.39  | 0.18  | 7.07E-01 | no |
| Wdr5          | 31.76  | 27.92  | -0.19 | 7.07E-01 | no |

|              |       |       |       |          |    |
|--------------|-------|-------|-------|----------|----|
| Cep152       | 10.83 | 9.45  | -0.20 | 7.07E-01 | no |
| Ufm1         | 11.45 | 9.85  | -0.22 | 7.07E-01 | no |
| Col14a1      | 0.05  | 0.02  | -1.17 | 7.07E-01 | no |
| Mettl9       | 30.56 | 26.42 | -0.21 | 7.07E-01 | no |
| 0610009D07Ri | 37.37 | 31.79 | -0.23 | 7.07E-01 | no |
| Baiap2l2     | 0.07  | 0.16  | 1.23  | 7.07E-01 | no |
| Ppapdc3      | 0.17  | 0.31  | 0.83  | 7.07E-01 | no |
| Ier5         | 12.72 | 14.76 | 0.21  | 7.08E-01 | no |
| Nipsnap3b    | 23.97 | 20.23 | -0.25 | 7.08E-01 | no |
| Pfdn4        | 15.36 | 12.40 | -0.31 | 7.08E-01 | no |
| Rab8b        | 21.98 | 25.02 | 0.19  | 7.08E-01 | no |
| Hdac8        | 17.99 | 15.18 | -0.25 | 7.08E-01 | no |
| Nupl1        | 28.57 | 24.90 | -0.20 | 7.08E-01 | no |
| Cdh6         | 0.03  | 0.08  | 1.70  | 7.08E-01 | no |
| Pxdn         | 0.01  | 0.03  | 1.70  | 7.08E-01 | no |
| Rpl39l       | 0.09  | 0.29  | 1.70  | 7.08E-01 | no |
| Spag6        | 0.03  | 0.09  | 1.70  | 7.08E-01 | no |
| 4930579G22Ri | 0.39  | 0.72  | 0.90  | 7.08E-01 | no |
| Bmp2k        | 7.34  | 8.48  | 0.21  | 7.08E-01 | no |
| Tspyl1       | 29.12 | 33.17 | 0.19  | 7.08E-01 | no |
| Atp6v1a      | 24.73 | 28.09 | 0.18  | 7.08E-01 | no |
| Chd9         | 18.68 | 16.54 | -0.17 | 7.08E-01 | no |
| Dffa         | 21.86 | 19.04 | -0.20 | 7.08E-01 | no |
| Anxa1        | 23.53 | 19.88 | -0.24 | 7.08E-01 | no |
| Ell2         | 3.13  | 2.48  | -0.33 | 7.08E-01 | no |
| Zfp647       | 2.03  | 1.52  | -0.41 | 7.08E-01 | no |
| Oosp1        | 0.39  | 0.14  | -1.44 | 7.08E-01 | no |
| Cenpv        | 3.64  | 2.66  | -0.45 | 7.08E-01 | no |
| Gnal         | 2.22  | 2.94  | 0.41  | 7.09E-01 | no |
| N4bp2l2      | 14.74 | 12.99 | -0.18 | 7.09E-01 | no |
| Tlcd1        | 3.40  | 2.57  | -0.41 | 7.09E-01 | no |
| Dpf2         | 33.65 | 29.59 | -0.19 | 7.10E-01 | no |
| Mospd3       | 31.11 | 26.85 | -0.21 | 7.10E-01 | no |
| Scml4        | 8.07  | 6.88  | -0.23 | 7.10E-01 | no |
| Pnlcd1       | 0.54  | 0.34  | -0.65 | 7.10E-01 | no |
| Rab11a       | 26.70 | 23.04 | -0.21 | 7.10E-01 | no |
| Tmem20       | 5.73  | 4.69  | -0.29 | 7.10E-01 | no |
| Lcmt1        | 11.35 | 9.21  | -0.30 | 7.10E-01 | no |
| Xkr8         | 1.64  | 2.09  | 0.35  | 7.10E-01 | no |
| Ufsp2        | 14.02 | 11.56 | -0.28 | 7.10E-01 | no |
| Haus1        | 19.04 | 15.64 | -0.28 | 7.10E-01 | no |
| Rdh5         | 1.16  | 1.62  | 0.49  | 7.10E-01 | no |

|              |        |        |           |          |    |
|--------------|--------|--------|-----------|----------|----|
| Mrpl35       | 7.65   | 6.37   | -0.26     | 7.10E-01 | no |
| Kis2         | 0.15   | 0.04   | -1.99     | 7.10E-01 | no |
| Pds5b        | 33.42  | 29.64  | -0.17     | 7.10E-01 | no |
| Abt1         | 6.04   | 5.04   | -0.26     | 7.11E-01 | no |
| Dr1          | 33.78  | 29.69  | -0.19     | 7.11E-01 | no |
| Gtpbp1       | 33.68  | 29.76  | -0.18     | 7.12E-01 | no |
| Adra2b       | 0.07   | 0.02   | -1.97     | 7.12E-01 | no |
| Pde10a       | 0.03   | 0.01   | -1.57     | 7.12E-01 | no |
| Klk1b4       | 0.00   | 0.03   | 1.79769e+ | 7.12E-01 | no |
| Klk1b5       | 0.00   | 0.03   | 1.79769e+ | 7.12E-01 | no |
| Krt81        | 0.00   | 0.01   | 1.79769e+ | 7.12E-01 | no |
| Krt83        | 0.00   | 0.01   | 1.79769e+ | 7.12E-01 | no |
| Krt86        | 0.00   | 0.01   | 1.79769e+ | 7.12E-01 | no |
| Adcy4        | 0.08   | 0.15   | 0.87      | 7.12E-01 | no |
| Sh2d3c       | 20.93  | 23.87  | 0.19      | 7.12E-01 | no |
| Glyr1        | 56.81  | 51.31  | -0.15     | 7.12E-01 | no |
| Rac1         | 90.59  | 80.36  | -0.17     | 7.12E-01 | no |
| LOC654426    | 120.45 | 103.86 | -0.21     | 7.12E-01 | no |
| Oraov1       | 12.55  | 10.49  | -0.26     | 7.12E-01 | no |
| Cdon         | 2.15   | 1.74   | -0.31     | 7.12E-01 | no |
| Klra1        | 8.05   | 6.37   | -0.34     | 7.12E-01 | no |
| Mertk        | 0.06   | 0.02   | -1.54     | 7.12E-01 | no |
| Fkbp1a       | 60.58  | 53.31  | -0.18     | 7.13E-01 | no |
| Med12l       | 0.37   | 0.49   | 0.40      | 7.13E-01 | no |
| Zfp948       | 1.47   | 1.10   | -0.42     | 7.13E-01 | no |
| Dnaja2       | 41.27  | 36.43  | -0.18     | 7.14E-01 | no |
| Wdr75        | 18.77  | 16.17  | -0.22     | 7.14E-01 | no |
| Rsph3b       | 8.68   | 10.56  | 0.28      | 7.14E-01 | no |
| Pfdn2        | 27.71  | 22.86  | -0.28     | 7.14E-01 | no |
| Ftcd         | 0.00   | 0.01   | 1.79769e+ | 7.14E-01 | no |
| Gm4461       | 0.00   | 0.02   | 1.79769e+ | 7.14E-01 | no |
| Slamf8       | 0.10   | 0.20   | 0.99      | 7.14E-01 | no |
| Mcrs1        | 40.05  | 35.23  | -0.18     | 7.14E-01 | no |
| Fam132b      | 0.82   | 0.59   | -0.46     | 7.14E-01 | no |
| Lmf1         | 6.99   | 8.60   | 0.30      | 7.14E-01 | no |
| Ring1        | 10.15  | 12.08  | 0.25      | 7.14E-01 | no |
| Slc41a1      | 6.76   | 7.92   | 0.23      | 7.15E-01 | no |
| Ubc          | 10.10  | 8.51   | -0.25     | 7.15E-01 | no |
| Aptx         | 3.07   | 3.69   | 0.27      | 7.15E-01 | no |
| Sfxn1        | 40.33  | 35.61  | -0.18     | 7.15E-01 | no |
| Gmpr2        | 22.19  | 18.88  | -0.23     | 7.16E-01 | no |
| 1700001G17Ri | 0.68   | 1.04   | 0.62      | 7.16E-01 | no |

|              |       |       |       |          |    |
|--------------|-------|-------|-------|----------|----|
| Tanc2        | 1.29  | 1.57  | 0.29  | 7.16E-01 | no |
| Akap13       | 29.01 | 32.87 | 0.18  | 7.16E-01 | no |
| Msl2         | 39.38 | 34.93 | -0.17 | 7.16E-01 | no |
| B3galtl      | 3.83  | 3.12  | -0.30 | 7.16E-01 | no |
| Col11a2      | 1.19  | 1.50  | 0.33  | 7.16E-01 | no |
| Nsun4        | 6.82  | 8.14  | 0.26  | 7.16E-01 | no |
| Mrpl19       | 10.77 | 9.33  | -0.21 | 7.16E-01 | no |
| Lgals1       | 41.27 | 35.23 | -0.23 | 7.16E-01 | no |
| BC017612     | 11.40 | 9.08  | -0.33 | 7.16E-01 | no |
| Cox18        | 11.40 | 9.38  | -0.28 | 7.16E-01 | no |
| Snhg1        | 36.73 | 29.93 | -0.30 | 7.16E-01 | no |
| Grhl1        | 0.76  | 0.53  | -0.52 | 7.16E-01 | no |
| 1700021F05Ri | 11.03 | 8.81  | -0.33 | 7.16E-01 | no |
| Nap1l4       | 53.55 | 47.43 | -0.18 | 7.17E-01 | no |
| Rnf219       | 13.12 | 11.29 | -0.22 | 7.17E-01 | no |
| Cirh1a       | 19.35 | 16.62 | -0.22 | 7.17E-01 | no |
| Rpa3         | 32.08 | 26.39 | -0.28 | 7.17E-01 | no |
| Hsf2bp       | 0.14  | 0.07  | -1.08 | 7.17E-01 | no |
| Igsf10       | 0.44  | 0.58  | 0.38  | 7.17E-01 | no |
| Ccdc38       | 1.58  | 2.03  | 0.36  | 7.17E-01 | no |
| Ugdh         | 16.46 | 19.13 | 0.22  | 7.17E-01 | no |
| Thg1l        | 16.92 | 13.81 | -0.29 | 7.17E-01 | no |
| Gmps         | 21.01 | 18.49 | -0.18 | 7.17E-01 | no |
| Wnk1         | 69.30 | 64.23 | -0.11 | 7.17E-01 | no |
| Gm129        | 2.28  | 3.00  | 0.40  | 7.17E-01 | no |
| Rap2c        | 26.98 | 23.66 | -0.19 | 7.17E-01 | no |
| Elp3         | 23.35 | 20.38 | -0.20 | 7.17E-01 | no |
| Pnkp         | 13.12 | 11.10 | -0.24 | 7.17E-01 | no |
| Mx1          | 1.84  | 2.39  | 0.37  | 7.17E-01 | no |
| Dnase1       | 6.40  | 8.04  | 0.33  | 7.17E-01 | no |
| Esr1         | 6.07  | 7.20  | 0.25  | 7.17E-01 | no |
| Ell          | 10.88 | 12.66 | 0.22  | 7.17E-01 | no |
| Ripk3        | 24.96 | 28.45 | 0.19  | 7.17E-01 | no |
| Snrnp200     | 44.77 | 39.78 | -0.17 | 7.17E-01 | no |
| Cdk11b       | 28.74 | 25.31 | -0.18 | 7.17E-01 | no |
| A630001G21R  | 37.65 | 32.99 | -0.19 | 7.17E-01 | no |
| Ptpn4        | 7.12  | 6.01  | -0.24 | 7.17E-01 | no |
| Polr2h       | 18.97 | 15.46 | -0.29 | 7.17E-01 | no |
| Lamp3        | 2.65  | 2.08  | -0.35 | 7.17E-01 | no |
| Xkr7         | 0.52  | 0.35  | -0.56 | 7.17E-01 | no |
| Zp1          | 0.14  | 0.04  | -1.94 | 7.17E-01 | no |
| Dusp4        | 0.88  | 0.63  | -0.47 | 7.17E-01 | no |

|              |       |       |       |          |    |
|--------------|-------|-------|-------|----------|----|
| Smyd3        | 3.18  | 3.94  | 0.31  | 7.18E-01 | no |
| Ppm1k        | 8.59  | 7.36  | -0.22 | 7.18E-01 | no |
| Bap1         | 38.23 | 33.91 | -0.17 | 7.18E-01 | no |
| Slc25a40     | 9.81  | 8.16  | -0.26 | 7.18E-01 | no |
| Sv2a         | 1.46  | 1.87  | 0.36  | 7.18E-01 | no |
| Hmgn3        | 19.91 | 23.77 | 0.26  | 7.18E-01 | no |
| Mtdh         | 38.57 | 43.51 | 0.17  | 7.18E-01 | no |
| Fyn          | 22.38 | 25.10 | 0.17  | 7.18E-01 | no |
| Rbck1        | 51.57 | 57.64 | 0.16  | 7.18E-01 | no |
| Galnt7       | 14.33 | 12.59 | -0.19 | 7.18E-01 | no |
| Tmem138      | 21.08 | 17.32 | -0.28 | 7.18E-01 | no |
| Agap1        | 1.06  | 0.85  | -0.32 | 7.18E-01 | no |
| G6pdx        | 14.91 | 10.21 | -0.55 | 7.18E-01 | no |
| Efna2        | 0.04  | 0.14  | 1.92  | 7.19E-01 | no |
| Ecm1         | 3.63  | 4.59  | 0.34  | 7.19E-01 | no |
| Sfn          | 6.42  | 7.90  | 0.30  | 7.19E-01 | no |
| Rcbtb2       | 15.10 | 13.19 | -0.19 | 7.19E-01 | no |
| Tbpl1        | 19.37 | 16.75 | -0.21 | 7.19E-01 | no |
| 2900010J23Ri | 54.03 | 46.55 | -0.22 | 7.19E-01 | no |
| Wfdc9        | 0.50  | 0.13  | -1.94 | 7.19E-01 | no |
| Zdhhc23      | 1.56  | 2.12  | 0.45  | 7.19E-01 | no |
| Ggh          | 4.88  | 6.24  | 0.36  | 7.19E-01 | no |
| Sepw1        | 38.67 | 45.37 | 0.23  | 7.19E-01 | no |
| Surf4        | 40.35 | 35.71 | -0.18 | 7.19E-01 | no |
| 1110004F10Ri | 56.91 | 49.98 | -0.19 | 7.19E-01 | no |
| Myo1a        | 0.33  | 0.23  | -0.55 | 7.19E-01 | no |
| Cstf1        | 29.32 | 25.49 | -0.20 | 7.19E-01 | no |
| Slfnl1       | 0.15  | 0.06  | -1.37 | 7.19E-01 | no |
| Klhdc3       | 34.98 | 30.97 | -0.18 | 7.19E-01 | no |
| Foxj1        | 0.15  | 0.08  | -0.91 | 7.19E-01 | no |
| Dus1l        | 23.64 | 20.48 | -0.21 | 7.20E-01 | no |
| Mprlp        | 27.25 | 29.88 | 0.13  | 7.20E-01 | no |
| Trappc5      | 15.78 | 13.43 | -0.23 | 7.20E-01 | no |
| Pdxk         | 8.68  | 10.00 | 0.20  | 7.20E-01 | no |
| Ninl         | 0.52  | 0.39  | -0.43 | 7.20E-01 | no |
| Bag4         | 9.17  | 7.86  | -0.22 | 7.21E-01 | no |
| Dync2li1     | 0.99  | 1.38  | 0.49  | 7.21E-01 | no |
| Rnft2        | 0.02  | 0.07  | 1.40  | 7.21E-01 | no |
| Atf6b        | 24.18 | 21.18 | -0.19 | 7.21E-01 | no |
| 1500002O20Ri | 12.50 | 14.62 | 0.23  | 7.21E-01 | no |
| A830080D01R  | 16.07 | 13.91 | -0.21 | 7.21E-01 | no |
| Hbegf        | 0.29  | 0.17  | -0.72 | 7.21E-01 | no |

|              |       |       |       |          |    |
|--------------|-------|-------|-------|----------|----|
| Ahctf1       | 24.39 | 21.69 | -0.17 | 7.21E-01 | no |
| Zfp1         | 9.26  | 11.08 | 0.26  | 7.22E-01 | no |
| Psmc3        | 48.06 | 42.57 | -0.17 | 7.22E-01 | no |
| Nr4a3        | 0.06  | 0.15  | 1.29  | 7.22E-01 | no |
| Naa30        | 14.17 | 16.24 | 0.20  | 7.22E-01 | no |
| Larp4        | 27.53 | 24.46 | -0.17 | 7.22E-01 | no |
| Tusc1        | 2.87  | 3.72  | 0.37  | 7.22E-01 | no |
| Gbf1         | 20.99 | 18.64 | -0.17 | 7.22E-01 | no |
| Spcs3        | 38.14 | 33.77 | -0.18 | 7.22E-01 | no |
| Polg2        | 4.66  | 3.65  | -0.35 | 7.22E-01 | no |
| Smad6        | 0.04  | 0.10  | 1.33  | 7.22E-01 | no |
| Fam198b      | 0.05  | 0.10  | 0.91  | 7.22E-01 | no |
| Shf          | 4.22  | 5.31  | 0.33  | 7.22E-01 | no |
| Pddc1        | 15.51 | 18.41 | 0.25  | 7.22E-01 | no |
| Ptprs        | 20.07 | 17.79 | -0.17 | 7.22E-01 | no |
| Med24        | 30.48 | 26.99 | -0.18 | 7.22E-01 | no |
| Hdac2        | 41.98 | 36.95 | -0.18 | 7.22E-01 | no |
| Noc4l        | 21.65 | 18.71 | -0.21 | 7.22E-01 | no |
| 1110008L16Ri | 6.91  | 5.72  | -0.27 | 7.22E-01 | no |
| Tm6sf2       | 0.53  | 0.33  | -0.71 | 7.22E-01 | no |
| A930007I19Ri | 0.85  | 1.17  | 0.46  | 7.23E-01 | no |
| Commd7       | 11.72 | 13.57 | 0.21  | 7.23E-01 | no |
| Ctdp1        | 17.75 | 15.58 | -0.19 | 7.23E-01 | no |
| Hmgcs2       | 0.05  | 0.11  | 1.09  | 7.23E-01 | no |
| Asl          | 7.43  | 9.10  | 0.29  | 7.23E-01 | no |
| Fosb         | 0.10  | 0.16  | 0.73  | 7.23E-01 | no |
| Sap30        | 19.29 | 16.17 | -0.26 | 7.23E-01 | no |
| Ccdc58       | 14.43 | 11.77 | -0.29 | 7.23E-01 | no |
| Mtvr2        | 26.55 | 22.77 | -0.22 | 7.23E-01 | no |
| Polr1e       | 6.78  | 5.63  | -0.27 | 7.23E-01 | no |
| 9130023H24Ri | 3.75  | 3.04  | -0.31 | 7.23E-01 | no |
| Qprt         | 1.68  | 1.23  | -0.45 | 7.24E-01 | no |
| Wdr11        | 14.44 | 16.46 | 0.19  | 7.24E-01 | no |
| Yipf3        | 17.24 | 20.00 | 0.21  | 7.24E-01 | no |
| Sipa1l1      | 12.44 | 11.16 | -0.16 | 7.24E-01 | no |
| Alkbh1       | 17.98 | 15.35 | -0.23 | 7.24E-01 | no |
| Plcx2        | 2.34  | 2.83  | 0.27  | 7.24E-01 | no |
| Spata24      | 17.86 | 14.80 | -0.27 | 7.24E-01 | no |
| Adamts20     | 0.09  | 0.04  | -1.11 | 7.24E-01 | no |
| 1810031K17Ri | 25.14 | 28.59 | 0.19  | 7.24E-01 | no |
| Prr13        | 31.22 | 26.85 | -0.22 | 7.24E-01 | no |
| Fcho2        | 9.99  | 11.52 | 0.21  | 7.25E-01 | no |

|               |        |        |       |          |    |
|---------------|--------|--------|-------|----------|----|
| Atp1b2        | 0.22   | 0.13   | -0.77 | 7.25E-01 | no |
| Mtch2         | 21.88  | 18.94  | -0.21 | 7.25E-01 | no |
| Chst2         | 0.08   | 0.04   | -0.89 | 7.25E-01 | no |
| Vmn2r84       | 0.22   | 0.36   | 0.68  | 7.25E-01 | no |
| H3f3b         | 357.77 | 316.26 | -0.18 | 7.25E-01 | no |
| Zmynd19       | 22.83  | 19.38  | -0.24 | 7.25E-01 | no |
| Alkbh8        | 14.03  | 11.89  | -0.24 | 7.25E-01 | no |
| 4933432B09Ri  | 0.59   | 0.44   | -0.43 | 7.25E-01 | no |
| Fam46c        | 0.79   | 0.56   | -0.49 | 7.25E-01 | no |
| Rpph1         | 2.53   | 1.61   | -0.65 | 7.25E-01 | no |
| Rad23a        | 31.96  | 28.07  | -0.19 | 7.26E-01 | no |
| Bmp4          | 0.12   | 0.03   | -1.90 | 7.26E-01 | no |
| Zbtb41        | 8.38   | 7.31   | -0.20 | 7.26E-01 | no |
| Plk1s1        | 6.60   | 7.98   | 0.27  | 7.26E-01 | no |
| Mtap4         | 21.00  | 18.64  | -0.17 | 7.26E-01 | no |
| Nagpa         | 11.85  | 10.09  | -0.23 | 7.26E-01 | no |
| Gch1          | 1.77   | 2.30   | 0.38  | 7.27E-01 | no |
| Ptpn18        | 15.56  | 18.24  | 0.23  | 7.27E-01 | no |
| Pabpc6        | 0.45   | 0.31   | -0.52 | 7.27E-01 | no |
| Slc16a11      | 0.09   | 0.22   | 1.23  | 7.27E-01 | no |
| 4933426M11R   | 10.22  | 11.72  | 0.20  | 7.27E-01 | no |
| Fem1a         | 16.16  | 14.33  | -0.17 | 7.27E-01 | no |
| Rad50         | 20.39  | 18.07  | -0.17 | 7.27E-01 | no |
| Acot8         | 11.79  | 9.60   | -0.30 | 7.27E-01 | no |
| Dcp1b         | 6.00   | 7.16   | 0.25  | 7.28E-01 | no |
| 4930455C21Ri  | 11.04  | 9.21   | -0.26 | 7.28E-01 | no |
| D3Erttd254e   | 2.01   | 2.47   | 0.29  | 7.28E-01 | no |
| 2700050L05Ril | 12.19  | 10.67  | -0.19 | 7.28E-01 | no |
| Tfb1m         | 11.34  | 9.24   | -0.30 | 7.28E-01 | no |
| Tppp          | 0.39   | 0.28   | -0.48 | 7.28E-01 | no |
| Kcnj10        | 0.09   | 0.14   | 0.67  | 7.28E-01 | no |
| Ehbp1         | 0.62   | 0.82   | 0.39  | 7.28E-01 | no |
| Acss2         | 1.50   | 1.93   | 0.37  | 7.28E-01 | no |
| Mphosph10     | 17.13  | 14.75  | -0.22 | 7.28E-01 | no |
| Dimt1         | 4.78   | 3.82   | -0.32 | 7.28E-01 | no |
| Tmem141       | 0.39   | 0.69   | 0.82  | 7.29E-01 | no |
| Zfp192        | 9.36   | 10.62  | 0.18  | 7.29E-01 | no |
| H2-Ob         | 39.98  | 45.20  | 0.18  | 7.29E-01 | no |
| Fam82a2       | 15.53  | 13.31  | -0.22 | 7.29E-01 | no |
| Erap1         | 26.88  | 30.31  | 0.17  | 7.29E-01 | no |
| Lars          | 21.06  | 18.57  | -0.18 | 7.29E-01 | no |
| Mrps30        | 22.67  | 19.40  | -0.22 | 7.29E-01 | no |

|              |        |        |       |          |    |
|--------------|--------|--------|-------|----------|----|
| Katnal2      | 0.16   | 0.04   | -1.90 | 7.29E-01 | no |
| Rcan2        | 0.10   | 0.02   | -2.00 | 7.29E-01 | no |
| Ddx28        | 8.53   | 7.03   | -0.28 | 7.29E-01 | no |
| Ylpm1        | 25.08  | 22.36  | -0.17 | 7.30E-01 | no |
| Rhot2        | 25.67  | 22.61  | -0.18 | 7.30E-01 | no |
| Glt28d2      | 0.12   | 0.05   | -1.24 | 7.30E-01 | no |
| Yy1          | 44.05  | 39.03  | -0.17 | 7.30E-01 | no |
| Oxnad1       | 7.05   | 5.76   | -0.29 | 7.30E-01 | no |
| Zfp944       | 10.31  | 12.14  | 0.24  | 7.30E-01 | no |
| Kctd20       | 34.82  | 30.73  | -0.18 | 7.30E-01 | no |
| Ndufv2       | 29.72  | 25.57  | -0.22 | 7.30E-01 | no |
| Dtx2         | 13.78  | 11.84  | -0.22 | 7.30E-01 | no |
| Exosc5       | 32.75  | 28.10  | -0.22 | 7.30E-01 | no |
| Pot1b        | 10.69  | 9.15   | -0.22 | 7.30E-01 | no |
| Smyd4        | 5.28   | 4.38   | -0.27 | 7.30E-01 | no |
| Nrip2        | 1.38   | 1.02   | -0.43 | 7.30E-01 | no |
| Cyth2        | 14.04  | 12.14  | -0.21 | 7.31E-01 | no |
| Rps27        | 21.52  | 27.35  | 0.35  | 7.31E-01 | no |
| Ids          | 5.65   | 6.68   | 0.24  | 7.31E-01 | no |
| Rfx5         | 15.83  | 18.00  | 0.19  | 7.31E-01 | no |
| Rpl32        | 241.98 | 215.16 | -0.17 | 7.31E-01 | no |
| Mak16        | 28.04  | 24.38  | -0.20 | 7.31E-01 | no |
| Mei4         | 5.47   | 4.45   | -0.30 | 7.31E-01 | no |
| 8030462N17Ri | 11.74  | 10.09  | -0.22 | 7.31E-01 | no |
| Snip1        | 22.26  | 19.39  | -0.20 | 7.31E-01 | no |
| Slc10a1      | 0.20   | 0.07   | -1.46 | 7.31E-01 | no |
| Klhl12       | 10.34  | 8.82   | -0.23 | 7.32E-01 | no |
| Ccdc109b     | 0.11   | 0.24   | 1.19  | 7.32E-01 | no |
| Xrra1        | 0.08   | 0.16   | 0.92  | 7.32E-01 | no |
| Mbd5         | 4.87   | 5.66   | 0.22  | 7.32E-01 | no |
| Foxn3        | 23.12  | 26.35  | 0.19  | 7.32E-01 | no |
| Lias         | 15.46  | 13.06  | -0.24 | 7.32E-01 | no |
| Zcchc7       | 19.48  | 22.32  | 0.20  | 7.32E-01 | no |
| Lrig2        | 10.07  | 8.83   | -0.19 | 7.32E-01 | no |
| Mgp          | 0.13   | 0.46   | 1.86  | 7.32E-01 | no |
| Tlr12        | 2.87   | 3.57   | 0.32  | 7.32E-01 | no |
| Baz2a        | 33.46  | 37.61  | 0.17  | 7.32E-01 | no |
| Pitpna       | 35.21  | 31.29  | -0.17 | 7.32E-01 | no |
| Spcs1        | 31.32  | 26.61  | -0.24 | 7.32E-01 | no |
| Grhpr        | 11.62  | 9.53   | -0.29 | 7.33E-01 | no |
| Fam59b       | 0.06   | 0.01   | -2.60 | 7.33E-01 | no |
| Gtf2h2       | 14.20  | 11.88  | -0.26 | 7.33E-01 | no |



|              |        |        |       |          |    |
|--------------|--------|--------|-------|----------|----|
| Tsen2        | 3.92   | 3.11   | -0.34 | 7.33E-01 | no |
| Trerf1       | 0.31   | 0.21   | -0.56 | 7.33E-01 | no |
| Tbc1d10a     | 8.18   | 9.81   | 0.26  | 7.33E-01 | no |
| AA960436     | 11.50  | 13.66  | 0.25  | 7.33E-01 | no |
| Fam3a        | 7.56   | 9.17   | 0.28  | 7.33E-01 | no |
| Bcl7a        | 103.13 | 91.86  | -0.17 | 7.33E-01 | no |
| Gpd2         | 9.00   | 7.87   | -0.19 | 7.33E-01 | no |
| S1pr5        | 0.18   | 0.09   | -0.98 | 7.33E-01 | no |
| Epdr1        | 0.12   | 0.05   | -1.36 | 7.33E-01 | no |
| Rilpl2       | 20.45  | 23.88  | 0.22  | 7.34E-01 | no |
| B3gnt2       | 112.32 | 122.72 | 0.13  | 7.34E-01 | no |
| Gnai3        | 48.77  | 43.41  | -0.17 | 7.34E-01 | no |
| Aff3         | 36.47  | 40.93  | 0.17  | 7.34E-01 | no |
| Lrrc8a       | 7.43   | 6.35   | -0.23 | 7.34E-01 | no |
| Bcap31       | 47.83  | 41.82  | -0.19 | 7.34E-01 | no |
| Tssc1        | 13.71  | 11.56  | -0.25 | 7.34E-01 | no |
| Cdca7l       | 32.74  | 28.93  | -0.18 | 7.34E-01 | no |
| Paox         | 13.19  | 15.55  | 0.24  | 7.34E-01 | no |
| Unc119       | 6.66   | 8.25   | 0.31  | 7.34E-01 | no |
| Vmn2r96      | 0.15   | 0.04   | -1.88 | 7.34E-01 | no |
| 1700056E22Ri | 2.38   | 1.76   | -0.43 | 7.34E-01 | no |
| Ndufs6       | 41.60  | 35.01  | -0.25 | 7.34E-01 | no |
| Dhx36        | 21.77  | 19.29  | -0.17 | 7.34E-01 | no |
| Tcta         | 6.92   | 8.52   | 0.30  | 7.34E-01 | no |
| Ccdc47       | 23.22  | 20.44  | -0.18 | 7.34E-01 | no |
| Sfxn2        | 4.35   | 3.55   | -0.29 | 7.34E-01 | no |
| Mrps9        | 29.68  | 25.69  | -0.21 | 7.35E-01 | no |
| Cox6c        | 80.01  | 68.90  | -0.22 | 7.35E-01 | no |
| 9230115E21Ri | 1.49   | 1.09   | -0.45 | 7.35E-01 | no |
| Apip         | 16.00  | 13.10  | -0.29 | 7.35E-01 | no |
| Chst13       | 0.16   | 0.04   | -1.86 | 7.35E-01 | no |
| Zfp605       | 3.45   | 4.25   | 0.30  | 7.35E-01 | no |
| Lrrc49       | 4.33   | 5.24   | 0.27  | 7.35E-01 | no |
| Gcnt1        | 8.26   | 7.10   | -0.22 | 7.35E-01 | no |
| Slc5a3       | 2.02   | 1.67   | -0.27 | 7.35E-01 | no |
| Nap1l3       | 0.67   | 0.91   | 0.44  | 7.35E-01 | no |
| Gdpd1        | 1.06   | 1.41   | 0.41  | 7.35E-01 | no |
| Ncrna00086   | 0.40   | 0.56   | 0.50  | 7.35E-01 | no |
| Peli1        | 20.28  | 17.78  | -0.19 | 7.35E-01 | no |
| U2af1l4      | 20.94  | 17.42  | -0.27 | 7.35E-01 | no |
| Alg14        | 7.75   | 6.10   | -0.35 | 7.35E-01 | no |
| Tubgcp3      | 21.90  | 19.36  | -0.18 | 7.36E-01 | no |

|              |        |        |       |          |    |
|--------------|--------|--------|-------|----------|----|
| Usmg5        | 47.13  | 38.69  | -0.28 | 7.36E-01 | no |
| Sepx1        | 22.49  | 18.73  | -0.26 | 7.36E-01 | no |
| Uimc1        | 22.18  | 19.51  | -0.18 | 7.36E-01 | no |
| Ankrd46      | 15.63  | 18.06  | 0.21  | 7.36E-01 | no |
| Guca1a       | 0.30   | 0.54   | 0.84  | 7.36E-01 | no |
| Osbpl8       | 30.75  | 33.81  | 0.14  | 7.36E-01 | no |
| Prdx6        | 26.60  | 23.27  | -0.19 | 7.36E-01 | no |
| Pet112l      | 7.66   | 6.36   | -0.27 | 7.36E-01 | no |
| Fam36a       | 40.90  | 33.83  | -0.27 | 7.36E-01 | no |
| Cdh5         | 0.55   | 0.40   | -0.44 | 7.36E-01 | no |
| Upk1b        | 0.36   | 0.22   | -0.72 | 7.36E-01 | no |
| Slc6a13      | 0.19   | 0.10   | -0.91 | 7.36E-01 | no |
| Dll4         | 0.04   | 0.10   | 1.19  | 7.36E-01 | no |
| Lrrc25       | 0.36   | 0.56   | 0.64  | 7.36E-01 | no |
| F630110N24Ri | 8.48   | 10.24  | 0.27  | 7.36E-01 | no |
| Slain2       | 22.17  | 19.88  | -0.16 | 7.36E-01 | no |
| Adrbk1       | 122.77 | 109.44 | -0.17 | 7.36E-01 | no |
| Hsd17b7      | 3.97   | 3.25   | -0.29 | 7.36E-01 | no |
| Kel          | 0.13   | 0.06   | -1.10 | 7.36E-01 | no |
| Lrriq3       | 0.03   | 0.12   | 1.82  | 7.36E-01 | no |
| Evi5l        | 5.45   | 6.74   | 0.31  | 7.36E-01 | no |
| D2hgdh       | 9.94   | 11.56  | 0.22  | 7.36E-01 | no |
| Peg13        | 7.26   | 8.44   | 0.22  | 7.36E-01 | no |
| Klf10        | 12.38  | 14.35  | 0.21  | 7.36E-01 | no |
| Kctd10       | 28.93  | 32.49  | 0.17  | 7.36E-01 | no |
| Trp53bp1     | 16.23  | 18.21  | 0.17  | 7.36E-01 | no |
| Mta1         | 34.76  | 30.88  | -0.17 | 7.36E-01 | no |
| Agpat6       | 19.16  | 16.92  | -0.18 | 7.36E-01 | no |
| Heca         | 18.52  | 16.29  | -0.19 | 7.36E-01 | no |
| Zfp521       | 0.78   | 0.60   | -0.38 | 7.36E-01 | no |
| Ifng         | 0.18   | 0.06   | -1.53 | 7.36E-01 | no |
| Kdm2b        | 29.67  | 26.87  | -0.14 | 7.36E-01 | no |
| Polr2e       | 34.01  | 29.32  | -0.21 | 7.37E-01 | no |
| Socs1        | 7.01   | 5.59   | -0.33 | 7.37E-01 | no |
| Gucy1b2      | 0.03   | 0.10   | 1.63  | 7.37E-01 | no |
| Lrrtm2       | 0.09   | 0.14   | 0.70  | 7.37E-01 | no |
| Map4k3       | 2.65   | 3.26   | 0.30  | 7.37E-01 | no |
| Cr1l         | 28.73  | 32.98  | 0.20  | 7.37E-01 | no |
| Ccdc71       | 16.62  | 14.53  | -0.19 | 7.37E-01 | no |
| Usp21        | 20.48  | 17.80  | -0.20 | 7.37E-01 | no |
| Sdf2l1       | 34.51  | 29.86  | -0.21 | 7.37E-01 | no |
| Polr2c       | 25.50  | 22.06  | -0.21 | 7.37E-01 | no |

|           |       |       |           |          |    |
|-----------|-------|-------|-----------|----------|----|
| Fastkd3   | 9.33  | 7.81  | -0.26     | 7.37E-01 | no |
| Uchl4     | 15.08 | 12.43 | -0.28     | 7.37E-01 | no |
| Sip1      | 11.52 | 9.38  | -0.30     | 7.37E-01 | no |
| Cnr2      | 1.59  | 1.23  | -0.37     | 7.37E-01 | no |
| Fap       | 0.12  | 0.06  | -1.11     | 7.37E-01 | no |
| Chadl     | 0.08  | 0.01  | -2.44     | 7.37E-01 | no |
| Suclg1    | 30.70 | 26.58 | -0.21     | 7.37E-01 | no |
| Osgin1    | 0.06  | 0.14  | 1.28      | 7.37E-01 | no |
| Eif2ak3   | 19.42 | 21.87 | 0.17      | 7.37E-01 | no |
| Gmppb     | 8.57  | 7.06  | -0.28     | 7.37E-01 | no |
| Impa2     | 24.64 | 21.21 | -0.22     | 7.37E-01 | no |
| Gm6225    | 0.50  | 0.33  | -0.61     | 7.38E-01 | no |
| Shmt1     | 29.85 | 26.26 | -0.19     | 7.38E-01 | no |
| Hist1h2bg | 0.68  | 0.35  | -0.96     | 7.38E-01 | no |
| Mapk4     | 0.11  | 0.06  | -0.83     | 7.38E-01 | no |
| Mbd1      | 25.27 | 28.57 | 0.18      | 7.38E-01 | no |
| Nup188    | 26.57 | 23.72 | -0.16     | 7.38E-01 | no |
| Pram1     | 1.24  | 1.65  | 0.41      | 7.38E-01 | no |
| Nup210l   | 1.81  | 1.46  | -0.31     | 7.38E-01 | no |
| Ngb       | 0.17  | 0.07  | -1.33     | 7.38E-01 | no |
| Ubxn7     | 18.68 | 16.66 | -0.17     | 7.38E-01 | no |
| Fam48a    | 26.69 | 30.47 | 0.19      | 7.39E-01 | no |
| Rbx1      | 28.14 | 24.44 | -0.20     | 7.39E-01 | no |
| Agpat5    | 10.33 | 8.86  | -0.22     | 7.39E-01 | no |
| Figf      | 0.00  | 0.00  | 1.79769e+ | 7.39E-01 | no |
| Gm6498    | 0.00  | 0.01  | 1.79769e+ | 7.39E-01 | no |
| Serpina3k | 0.00  | 0.01  | 1.79769e+ | 7.39E-01 | no |
| Gm6924    | 0.02  | 0.05  | 1.62      | 7.39E-01 | no |
| Cadm4     | 0.44  | 0.62  | 0.50      | 7.39E-01 | no |
| Agbl3     | 1.08  | 1.38  | 0.36      | 7.39E-01 | no |
| Chchd5    | 7.30  | 8.98  | 0.30      | 7.39E-01 | no |
| Cops7a    | 30.31 | 26.74 | -0.18     | 7.39E-01 | no |
| Otud1     | 20.26 | 17.65 | -0.20     | 7.39E-01 | no |
| Sarnp     | 34.04 | 29.33 | -0.21     | 7.39E-01 | no |
| Mocs2     | 11.77 | 9.86  | -0.26     | 7.39E-01 | no |
| Usp51     | 0.32  | 0.20  | -0.67     | 7.39E-01 | no |
| Rnu73a    | 9.98  | 1.69  | -2.57     | 7.39E-01 | no |
| Lrrc8e    | 0.02  | 0.07  | 1.82      | 7.40E-01 | no |
| Lman1l    | 0.04  | 0.12  | 1.58      | 7.40E-01 | no |
| Aldh1a3   | 0.20  | 0.30  | 0.57      | 7.40E-01 | no |
| D9Ert402e | 3.12  | 3.86  | 0.31      | 7.40E-01 | no |
| Zfp799    | 4.55  | 5.45  | 0.26      | 7.40E-01 | no |

|              |       |       |       |          |    |
|--------------|-------|-------|-------|----------|----|
| Ifngr2       | 21.93 | 25.16 | 0.20  | 7.40E-01 | no |
| S1pr4        | 29.11 | 32.90 | 0.18  | 7.40E-01 | no |
| Zfand5       | 29.25 | 33.04 | 0.18  | 7.40E-01 | no |
| Ensa         | 51.34 | 46.16 | -0.15 | 7.40E-01 | no |
| Cdk8         | 20.04 | 17.46 | -0.20 | 7.40E-01 | no |
| Poll         | 10.71 | 9.11  | -0.23 | 7.40E-01 | no |
| Ptger4       | 6.48  | 5.41  | -0.26 | 7.40E-01 | no |
| 1110059G10Ri | 5.44  | 4.49  | -0.28 | 7.40E-01 | no |
| Ndufa5       | 21.19 | 17.25 | -0.30 | 7.40E-01 | no |
| Gm4349       | 6.23  | 4.90  | -0.35 | 7.40E-01 | no |
| Armc2        | 0.08  | 0.04  | -1.02 | 7.40E-01 | no |
| Plekhj1      | 24.10 | 20.63 | -0.22 | 7.40E-01 | no |
| G6pc3        | 13.13 | 15.59 | 0.25  | 7.40E-01 | no |
| Nipa2        | 12.91 | 11.13 | -0.21 | 7.40E-01 | no |
| Brp44l       | 20.05 | 16.57 | -0.28 | 7.40E-01 | no |
| Whsc2        | 27.47 | 24.17 | -0.18 | 7.41E-01 | no |
| Bloc1s3      | 5.19  | 6.40  | 0.30  | 7.41E-01 | no |
| Zfml         | 29.14 | 26.22 | -0.15 | 7.41E-01 | no |
| 2010106G01Ri | 16.32 | 14.44 | -0.18 | 7.41E-01 | no |
| Fam89a       | 1.26  | 1.70  | 0.44  | 7.41E-01 | no |
| Sun1         | 10.42 | 11.94 | 0.20  | 7.41E-01 | no |
| Nat15        | 35.55 | 31.51 | -0.17 | 7.41E-01 | no |
| Jmjd5        | 9.19  | 7.74  | -0.25 | 7.41E-01 | no |
| Rac3         | 1.70  | 1.24  | -0.45 | 7.41E-01 | no |
| Cnksr2       | 0.04  | 0.01  | -1.51 | 7.41E-01 | no |
| A730017L22Ri | 1.83  | 2.35  | 0.36  | 7.41E-01 | no |
| Eif3d        | 49.29 | 43.90 | -0.17 | 7.41E-01 | no |
| Rbm19        | 10.06 | 8.76  | -0.20 | 7.41E-01 | no |
| Arrb2        | 17.40 | 14.91 | -0.22 | 7.41E-01 | no |
| Il4ra        | 4.07  | 3.42  | -0.25 | 7.41E-01 | no |
| Cbr2         | 0.08  | 0.27  | 1.81  | 7.42E-01 | no |
| Camkk1       | 0.37  | 0.51  | 0.46  | 7.42E-01 | no |
| Fam132a      | 4.97  | 6.22  | 0.32  | 7.42E-01 | no |
| Ppp4r1l-ps   | 3.73  | 4.48  | 0.26  | 7.42E-01 | no |
| Fn1          | 3.94  | 3.39  | -0.22 | 7.42E-01 | no |
| 1700040L02Ri | 1.47  | 1.98  | 0.42  | 7.42E-01 | no |
| Rab12        | 9.46  | 11.25 | 0.25  | 7.43E-01 | no |
| Engase       | 2.92  | 2.38  | -0.29 | 7.43E-01 | no |
| Hspb8        | 0.30  | 0.18  | -0.75 | 7.43E-01 | no |
| Atg13        | 12.60 | 14.42 | 0.19  | 7.43E-01 | no |
| Begain       | 1.95  | 2.45  | 0.33  | 7.43E-01 | no |
| Rasl11b      | 0.70  | 0.49  | -0.53 | 7.44E-01 | no |

|              |       |       |       |          |    |
|--------------|-------|-------|-------|----------|----|
| Rgs14        | 6.51  | 7.77  | 0.26  | 7.44E-01 | no |
| Farp2        | 0.27  | 0.37  | 0.48  | 7.44E-01 | no |
| Brd7         | 33.39 | 29.66 | -0.17 | 7.44E-01 | no |
| BC046404     | 4.62  | 3.72  | -0.31 | 7.44E-01 | no |
| Sar1a        | 40.90 | 36.38 | -0.17 | 7.45E-01 | no |
| Paqr3        | 1.14  | 0.81  | -0.48 | 7.45E-01 | no |
| Ippk         | 6.65  | 5.52  | -0.27 | 7.45E-01 | no |
| Gatad2b      | 30.23 | 26.58 | -0.19 | 7.45E-01 | no |
| 1110002N22Ri | 6.03  | 7.50  | 0.31  | 7.45E-01 | no |
| Thoc1        | 13.38 | 11.65 | -0.20 | 7.45E-01 | no |
| Gm12253      | 0.08  | 0.24  | 1.59  | 7.45E-01 | no |
| Gm527        | 0.22  | 0.39  | 0.78  | 7.45E-01 | no |
| Ppfia4       | 0.34  | 0.46  | 0.41  | 7.45E-01 | no |
| Iscu         | 38.03 | 43.75 | 0.20  | 7.45E-01 | no |
| Arpp19       | 26.84 | 24.09 | -0.16 | 7.45E-01 | no |
| Ccdc117      | 24.45 | 21.66 | -0.17 | 7.45E-01 | no |
| Ppp2r2a      | 31.05 | 27.43 | -0.18 | 7.45E-01 | no |
| Bckdha       | 25.64 | 22.38 | -0.20 | 7.45E-01 | no |
| Zc3hc1       | 18.27 | 15.73 | -0.22 | 7.45E-01 | no |
| Zswim3       | 5.06  | 4.16  | -0.28 | 7.45E-01 | no |
| Dusp3        | 2.63  | 2.13  | -0.31 | 7.45E-01 | no |
| Il6ra        | 1.11  | 0.85  | -0.38 | 7.45E-01 | no |
| Slc22a13     | 0.10  | 0.04  | -1.44 | 7.45E-01 | no |
| Adat3        | 6.14  | 4.95  | -0.31 | 7.45E-01 | no |
| 9430083A17Ri | 0.05  | 0.10  | 1.19  | 7.45E-01 | no |
| Plag1        | 2.37  | 2.92  | 0.30  | 7.45E-01 | no |
| Sap30bp      | 16.35 | 14.14 | -0.21 | 7.45E-01 | no |
| Myl9         | 0.26  | 0.11  | -1.21 | 7.45E-01 | no |
| Zfp273       | 4.39  | 5.41  | 0.30  | 7.45E-01 | no |
| Gpat2        | 0.13  | 0.22  | 0.73  | 7.45E-01 | no |
| Ndufc1       | 33.51 | 27.47 | -0.29 | 7.45E-01 | no |
| Zufsp        | 11.21 | 13.16 | 0.23  | 7.45E-01 | no |
| Abhd11       | 15.40 | 17.94 | 0.22  | 7.45E-01 | no |
| Slc25a35     | 3.37  | 2.41  | -0.49 | 7.45E-01 | no |
| Srp19        | 29.64 | 25.19 | -0.24 | 7.45E-01 | no |
| Synj2bp      | 9.96  | 8.84  | -0.17 | 7.45E-01 | no |
| Aoc2         | 6.03  | 4.98  | -0.27 | 7.45E-01 | no |
| Sssca1       | 19.53 | 16.13 | -0.28 | 7.45E-01 | no |
| Eppk1        | 0.05  | 0.03  | -0.63 | 7.45E-01 | no |
| Ipo4         | 15.37 | 13.52 | -0.19 | 7.46E-01 | no |
| Urm1         | 14.46 | 12.40 | -0.22 | 7.46E-01 | no |
| Tmem41a      | 5.52  | 4.39  | -0.33 | 7.46E-01 | no |

|              |       |       |            |          |    |
|--------------|-------|-------|------------|----------|----|
| Pid1         | 0.33  | 0.22  | -0.62      | 7.46E-01 | no |
| Actr1b       | 27.40 | 24.14 | -0.18      | 7.46E-01 | no |
| Gbas         | 12.66 | 14.78 | 0.22       | 7.46E-01 | no |
| Tbc1d14      | 18.54 | 20.62 | 0.15       | 7.46E-01 | no |
| Dlat         | 14.05 | 12.32 | -0.19      | 7.47E-01 | no |
| B630005N14Ri | 9.33  | 7.98  | -0.23      | 7.47E-01 | no |
| BC049762     | 0.16  | 0.35  | 1.14       | 7.47E-01 | no |
| Fam160a2     | 7.86  | 9.15  | 0.22       | 7.47E-01 | no |
| Rnf44        | 47.60 | 51.27 | 0.11       | 7.47E-01 | no |
| Snx3         | 47.87 | 42.29 | -0.18      | 7.47E-01 | no |
| Rnaseh2a     | 16.46 | 14.15 | -0.22      | 7.47E-01 | no |
| Osgin2       | 7.32  | 6.08  | -0.27      | 7.47E-01 | no |
| Klf17        | 0.08  | 0.04  | -1.17      | 7.47E-01 | no |
| Gm9733       | 0.19  | 0.49  | 1.34       | 7.47E-01 | no |
| Ccdc11       | 0.08  | 0.17  | 0.99       | 7.47E-01 | no |
| Lgals4       | 3.41  | 4.36  | 0.35       | 7.47E-01 | no |
| Arl4a        | 5.94  | 7.02  | 0.24       | 7.47E-01 | no |
| Ciapi1       | 8.65  | 7.47  | -0.21      | 7.47E-01 | no |
| 1110017F19Ri | 1.32  | 0.94  | -0.49      | 7.47E-01 | no |
| Zfp658       | 1.01  | 1.32  | 0.38       | 7.47E-01 | no |
| Acbd4        | 5.73  | 4.70  | -0.29      | 7.47E-01 | no |
| Rad51l3      | 3.23  | 3.81  | 0.24       | 7.47E-01 | no |
| Gm13138      | 0.01  | 0.00  | -1.79769e- | 7.47E-01 | no |
| Refbp2       | 12.30 | 10.21 | -0.27      | 7.47E-01 | no |
| Gabrd        | 0.19  | 0.09  | -1.00      | 7.47E-01 | no |
| Anapc2       | 34.41 | 30.70 | -0.16      | 7.47E-01 | no |
| Casp6        | 9.49  | 11.43 | 0.27       | 7.48E-01 | no |
| Efnb2        | 0.89  | 0.68  | -0.38      | 7.48E-01 | no |
| Ppie         | 24.78 | 21.25 | -0.22      | 7.48E-01 | no |
| Cyb561       | 0.31  | 0.20  | -0.62      | 7.48E-01 | no |
| 4732471D19Ri | 6.61  | 5.68  | -0.22      | 7.48E-01 | no |
| Wdr55        | 15.00 | 12.71 | -0.24      | 7.48E-01 | no |
| Snhg12       | 22.08 | 18.10 | -0.29      | 7.48E-01 | no |
| Rgp1         | 16.22 | 18.17 | 0.16       | 7.48E-01 | no |
| Zfp953       | 7.62  | 6.51  | -0.23      | 7.49E-01 | no |
| Gtf3c1       | 23.27 | 20.85 | -0.16      | 7.49E-01 | no |
| Dnajc3       | 22.32 | 19.90 | -0.17      | 7.49E-01 | no |
| Pot1a        | 16.81 | 14.70 | -0.19      | 7.49E-01 | no |
| Mark4        | 10.26 | 11.95 | 0.22       | 7.49E-01 | no |
| Tnfrsf17     | 0.10  | 0.33  | 1.78       | 7.49E-01 | no |
| Dcdc2b       | 0.97  | 0.64  | -0.60      | 7.49E-01 | no |
| Kdm3b        | 31.28 | 28.05 | -0.16      | 7.49E-01 | no |

|              |        |        |       |          |    |
|--------------|--------|--------|-------|----------|----|
| Cd3eap       | 8.08   | 6.80   | -0.25 | 7.49E-01 | no |
| Fam35a       | 5.24   | 6.24   | 0.25  | 7.49E-01 | no |
| Nkiras2      | 18.24  | 15.78  | -0.21 | 7.49E-01 | no |
| Cox6b2       | 10.12  | 7.88   | -0.36 | 7.49E-01 | no |
| Ptcd2        | 19.16  | 16.48  | -0.22 | 7.50E-01 | no |
| Tmx2         | 26.16  | 22.87  | -0.19 | 7.50E-01 | no |
| Gpr84        | 0.16   | 0.05   | -1.81 | 7.50E-01 | no |
| Slc30a7      | 6.78   | 7.70   | 0.18  | 7.50E-01 | no |
| Esyt2        | 18.15  | 20.36  | 0.17  | 7.50E-01 | no |
| Sf3b1        | 73.00  | 65.37  | -0.16 | 7.50E-01 | no |
| Vpreb3       | 219.23 | 195.91 | -0.16 | 7.50E-01 | no |
| Ssbp2        | 4.89   | 4.18   | -0.23 | 7.50E-01 | no |
| Fam173a      | 34.61  | 29.59  | -0.23 | 7.50E-01 | no |
| Dcaf7        | 46.05  | 41.32  | -0.16 | 7.50E-01 | no |
| Rnf10        | 51.88  | 46.54  | -0.16 | 7.50E-01 | no |
| Exoc4        | 14.15  | 16.04  | 0.18  | 7.50E-01 | no |
| Fnbp1        | 33.02  | 30.39  | -0.12 | 7.51E-01 | no |
| Casd1        | 18.12  | 20.54  | 0.18  | 7.51E-01 | no |
| Adrb2        | 2.66   | 3.36   | 0.34  | 7.51E-01 | no |
| Sh2d4b       | 0.15   | 0.29   | 0.91  | 7.51E-01 | no |
| Amh          | 0.95   | 0.70   | -0.45 | 7.51E-01 | no |
| Lrrc28       | 4.95   | 5.85   | 0.24  | 7.51E-01 | no |
| Ccdc73       | 0.78   | 0.59   | -0.40 | 7.51E-01 | no |
| Gchfr        | 0.56   | 0.28   | -0.97 | 7.51E-01 | no |
| Mcts1        | 33.08  | 28.05  | -0.24 | 7.51E-01 | no |
| Apobec2      | 1.93   | 1.44   | -0.42 | 7.51E-01 | no |
| Ube3c        | 16.08  | 14.27  | -0.17 | 7.52E-01 | no |
| Hes1         | 18.25  | 15.50  | -0.24 | 7.52E-01 | no |
| Ppp4r1       | 26.63  | 24.07  | -0.15 | 7.53E-01 | no |
| Cilp         | 0.02   | 0.05   | 1.57  | 7.53E-01 | no |
| 2410091C18Ri | 8.14   | 6.81   | -0.26 | 7.53E-01 | no |
| Dfna5        | 1.31   | 1.72   | 0.39  | 7.53E-01 | no |
| Vps54        | 18.26  | 20.52  | 0.17  | 7.53E-01 | no |
| lpo8         | 17.64  | 15.71  | -0.17 | 7.53E-01 | no |
| Wdr12        | 14.72  | 12.89  | -0.19 | 7.53E-01 | no |
| Fam3c        | 17.82  | 15.54  | -0.20 | 7.53E-01 | no |
| Qrich1       | 35.65  | 32.24  | -0.14 | 7.53E-01 | no |
| P2ry13       | 0.85   | 0.63   | -0.45 | 7.54E-01 | no |
| Slc2a1       | 8.26   | 6.96   | -0.25 | 7.54E-01 | no |
| Sec31b       | 1.04   | 1.32   | 0.34  | 7.54E-01 | no |
| Zfp946       | 5.99   | 7.16   | 0.26  | 7.54E-01 | no |
| Usp40        | 6.27   | 7.19   | 0.20  | 7.54E-01 | no |

|               |       |       |           |          |    |
|---------------|-------|-------|-----------|----------|----|
| Usp4          | 31.50 | 28.19 | -0.16     | 7.54E-01 | no |
| Mll3          | 18.50 | 16.59 | -0.16     | 7.54E-01 | no |
| Padi6         | 0.03  | 0.09  | 1.57      | 7.54E-01 | no |
| Irak4         | 6.66  | 7.88  | 0.24      | 7.54E-01 | no |
| Mrpl44        | 21.29 | 18.30 | -0.22     | 7.55E-01 | no |
| Mettl1        | 13.41 | 11.02 | -0.28     | 7.55E-01 | no |
| Dynlt1a       | 0.57  | 0.31  | -0.90     | 7.55E-01 | no |
| Cited4        | 0.32  | 0.17  | -0.92     | 7.55E-01 | no |
| D17H6S53E     | 5.66  | 7.10  | 0.33      | 7.56E-01 | no |
| Fam120b       | 9.09  | 10.26 | 0.17      | 7.56E-01 | no |
| Ccdc162       | 0.06  | 0.12  | 1.15      | 7.56E-01 | no |
| Hoxa3         | 0.63  | 0.86  | 0.44      | 7.56E-01 | no |
| Man2a1        | 27.53 | 24.69 | -0.16     | 7.56E-01 | no |
| Myo19         | 5.12  | 4.32  | -0.24     | 7.56E-01 | no |
| Coq4          | 6.80  | 5.61  | -0.28     | 7.56E-01 | no |
| 6030429G01Ri  | 0.58  | 0.80  | 0.45      | 7.56E-01 | no |
| AV320801      | 0.00  | 0.01  | 1.79769e+ | 7.56E-01 | no |
| Gm15023       | 0.00  | 0.01  | 1.79769e+ | 7.56E-01 | no |
| Pramel3       | 0.00  | 0.01  | 1.79769e+ | 7.56E-01 | no |
| Helb          | 19.42 | 17.31 | -0.17     | 7.56E-01 | no |
| Fam193a       | 18.10 | 16.12 | -0.17     | 7.56E-01 | no |
| Gm2a          | 38.25 | 33.91 | -0.17     | 7.56E-01 | no |
| Hipk2         | 9.88  | 8.67  | -0.19     | 7.56E-01 | no |
| Sclt1         | 8.89  | 7.60  | -0.23     | 7.56E-01 | no |
| Pycrl         | 18.15 | 15.47 | -0.23     | 7.56E-01 | no |
| Ypel1         | 4.90  | 4.02  | -0.28     | 7.56E-01 | no |
| Syngr4        | 0.87  | 0.60  | -0.55     | 7.56E-01 | no |
| 4831426I19Rik | 21.91 | 23.96 | 0.13      | 7.56E-01 | no |
| Arpc2         | 70.21 | 62.83 | -0.16     | 7.56E-01 | no |
| Rab4a         | 2.26  | 2.91  | 0.36      | 7.56E-01 | no |
| Trappc9       | 10.61 | 12.05 | 0.18      | 7.56E-01 | no |
| Svopl         | 0.30  | 0.19  | -0.66     | 7.56E-01 | no |
| C2cd2         | 1.53  | 1.87  | 0.29      | 7.56E-01 | no |
| E330033B04Ri  | 2.55  | 2.11  | -0.27     | 7.56E-01 | no |
| Kif4b         | 0.20  | 0.13  | -0.60     | 7.56E-01 | no |
| Bud13         | 14.56 | 12.60 | -0.21     | 7.56E-01 | no |
| Tm9sf3        | 35.62 | 31.99 | -0.16     | 7.56E-01 | no |
| Hist1h2bj     | 0.00  | 0.04  | 1.79769e+ | 7.56E-01 | no |
| Utp14a        | 19.05 | 16.73 | -0.19     | 7.57E-01 | no |
| Khl17         | 14.25 | 16.21 | 0.19      | 7.57E-01 | no |
| Lingo3        | 0.02  | 0.06  | 1.55      | 7.57E-01 | no |
| Nipsnap1      | 10.62 | 12.50 | 0.24      | 7.57E-01 | no |



|               |        |        |           |          |    |
|---------------|--------|--------|-----------|----------|----|
| Cops7b        | 19.44  | 16.99  | -0.20     | 7.57E-01 | no |
| Tgm4          | 2.37   | 1.90   | -0.32     | 7.57E-01 | no |
| Tmcc1         | 9.56   | 10.83  | 0.18      | 7.57E-01 | no |
| Capns1        | 39.66  | 44.75  | 0.17      | 7.57E-01 | no |
| Spag17        | 0.14   | 0.19   | 0.46      | 7.57E-01 | no |
| D830015G02R   | 0.00   | 0.02   | 1.79769e+ | 7.57E-01 | no |
| Clstn3        | 0.12   | 0.18   | 0.59      | 7.57E-01 | no |
| Slc7a8        | 0.40   | 0.53   | 0.43      | 7.57E-01 | no |
| 9030625A04Ri  | 2.61   | 3.27   | 0.32      | 7.57E-01 | no |
| Hcfc1r1       | 11.00  | 13.17  | 0.26      | 7.57E-01 | no |
| Pmpcb         | 25.53  | 22.23  | -0.20     | 7.57E-01 | no |
| 1810055G02Ri  | 2.12   | 1.66   | -0.35     | 7.57E-01 | no |
| Smagp         | 0.33   | 0.16   | -1.02     | 7.57E-01 | no |
| Ttc12         | 0.03   | 0.08   | 1.21      | 7.58E-01 | no |
| Smarcd1       | 28.62  | 25.55  | -0.16     | 7.58E-01 | no |
| Cetn2         | 29.91  | 25.77  | -0.22     | 7.58E-01 | no |
| Rnf114        | 23.72  | 26.63  | 0.17      | 7.58E-01 | no |
| D14Erttd668e  | 0.43   | 0.60   | 0.47      | 7.58E-01 | no |
| Pms1          | 6.82   | 5.74   | -0.25     | 7.58E-01 | no |
| C77080        | 0.31   | 0.22   | -0.44     | 7.58E-01 | no |
| Csf2ra        | 21.35  | 24.30  | 0.19      | 7.58E-01 | no |
| Pycard        | 14.93  | 12.87  | -0.21     | 7.59E-01 | no |
| Slc16a7       | 1.39   | 1.80   | 0.37      | 7.59E-01 | no |
| Mepce         | 25.71  | 22.93  | -0.16     | 7.59E-01 | no |
| Aars2         | 9.45   | 8.20   | -0.21     | 7.59E-01 | no |
| Nme4          | 14.80  | 12.25  | -0.27     | 7.59E-01 | no |
| Sp6           | 0.02   | 0.07   | 1.54      | 7.59E-01 | no |
| Gm13139       | 1.13   | 2.84   | 1.33      | 7.59E-01 | no |
| Ndufb3        | 43.79  | 37.16  | -0.24     | 7.59E-01 | no |
| Cdc37         | 44.64  | 40.00  | -0.16     | 7.60E-01 | no |
| Car9          | 2.21   | 2.79   | 0.34      | 7.60E-01 | no |
| Ddx17         | 202.57 | 189.41 | -0.10     | 7.60E-01 | no |
| Fig4          | 12.58  | 10.97  | -0.20     | 7.60E-01 | no |
| Lalba         | 2.84   | 2.11   | -0.43     | 7.60E-01 | no |
| Apba1         | 0.26   | 0.35   | 0.42      | 7.60E-01 | no |
| Ppp5c         | 33.88  | 38.00  | 0.17      | 7.60E-01 | no |
| Imp4          | 23.73  | 20.90  | -0.18     | 7.60E-01 | no |
| 2610029I01Rik | 2.68   | 3.38   | 0.34      | 7.60E-01 | no |
| Bex2          | 1.82   | 2.41   | 0.41      | 7.60E-01 | no |
| Gga2          | 19.73  | 22.05  | 0.16      | 7.60E-01 | no |
| 4930429B21Ri  | 0.02   | 0.10   | 2.11      | 7.60E-01 | no |
| Tdrd12        | 0.08   | 0.19   | 1.20      | 7.60E-01 | no |

|               |       |       |       |          |    |
|---------------|-------|-------|-------|----------|----|
| 1190005I06Rik | 0.32  | 0.54  | 0.77  | 7.60E-01 | no |
| Mst1          | 0.15  | 0.25  | 0.69  | 7.60E-01 | no |
| Ribc1         | 1.38  | 1.79  | 0.38  | 7.60E-01 | no |
| 4931440P22Ri  | 1.60  | 2.05  | 0.36  | 7.60E-01 | no |
| Mitd1         | 13.69 | 16.28 | 0.25  | 7.60E-01 | no |
| Cebpz         | 21.07 | 18.79 | -0.17 | 7.60E-01 | no |
| Srbd1         | 13.25 | 11.64 | -0.19 | 7.60E-01 | no |
| Med20         | 23.39 | 20.49 | -0.19 | 7.60E-01 | no |
| Atp5e         | 73.75 | 63.66 | -0.21 | 7.60E-01 | no |
| Kmo           | 5.44  | 4.46  | -0.29 | 7.60E-01 | no |
| Flt1          | 0.03  | 0.06  | 1.07  | 7.61E-01 | no |
| Npas1         | 0.46  | 0.65  | 0.48  | 7.61E-01 | no |
| B3gnt4        | 0.49  | 0.32  | -0.63 | 7.61E-01 | no |
| MacroD2       | 0.29  | 0.19  | -0.64 | 7.61E-01 | no |
| Plekhg5       | 2.00  | 1.62  | -0.31 | 7.61E-01 | no |
| Stub1         | 31.01 | 27.38 | -0.18 | 7.62E-01 | no |
| Zfp608        | 15.52 | 17.36 | 0.16  | 7.62E-01 | no |
| Akr1b3        | 21.70 | 18.73 | -0.21 | 7.62E-01 | no |
| Rpl36a        | 71.72 | 62.11 | -0.21 | 7.62E-01 | no |
| Scnn1a        | 0.02  | 0.07  | 1.53  | 7.62E-01 | no |
| Obscn         | 0.01  | 0.02  | 0.72  | 7.62E-01 | no |
| Rpp38         | 4.90  | 6.14  | 0.33  | 7.63E-01 | no |
| Bambi-ps1     | 1.70  | 1.28  | -0.41 | 7.63E-01 | no |
| Rps6          | 21.19 | 18.20 | -0.22 | 7.63E-01 | no |
| Spin2         | 0.21  | 0.37  | 0.83  | 7.63E-01 | no |
| Cpped1        | 5.52  | 6.60  | 0.26  | 7.63E-01 | no |
| Chmp1b        | 18.55 | 21.14 | 0.19  | 7.63E-01 | no |
| Cep68         | 23.67 | 26.42 | 0.16  | 7.63E-01 | no |
| Pdia6         | 41.90 | 37.43 | -0.16 | 7.63E-01 | no |
| D1ErtD622e    | 11.23 | 9.64  | -0.22 | 7.63E-01 | no |
| Bloc1s1       | 23.20 | 27.66 | 0.25  | 7.63E-01 | no |
| Ptpn3         | 0.19  | 0.25  | 0.46  | 7.63E-01 | no |
| Senp5         | 13.47 | 12.00 | -0.17 | 7.63E-01 | no |
| Fancg         | 16.69 | 14.72 | -0.18 | 7.63E-01 | no |
| Mrpl2         | 29.82 | 25.76 | -0.21 | 7.63E-01 | no |
| Ccdc21        | 12.04 | 13.64 | 0.18  | 7.63E-01 | no |
| Pcm1          | 25.33 | 22.79 | -0.15 | 7.63E-01 | no |
| Wfikkn1       | 0.39  | 0.54  | 0.47  | 7.63E-01 | no |
| Crlf2         | 18.15 | 20.91 | 0.20  | 7.63E-01 | no |
| Ikbkb         | 26.00 | 28.56 | 0.14  | 7.64E-01 | no |
| Plbd2         | 9.37  | 10.74 | 0.20  | 7.64E-01 | no |
| Zbtb7a        | 20.31 | 22.63 | 0.16  | 7.64E-01 | no |

|              |        |        |       |          |    |
|--------------|--------|--------|-------|----------|----|
| Ccdc163      | 11.47  | 9.54   | -0.26 | 7.64E-01 | no |
| Cpeb1        | 0.21   | 0.13   | -0.72 | 7.64E-01 | no |
| Dll1         | 0.10   | 0.05   | -0.95 | 7.64E-01 | no |
| Dynlrb2      | 0.16   | 0.46   | 1.53  | 7.64E-01 | no |
| Celf5        | 0.02   | 0.06   | 1.53  | 7.64E-01 | no |
| E430018J23Ri | 2.36   | 2.95   | 0.32  | 7.64E-01 | no |
| Fasn         | 23.37  | 21.06  | -0.15 | 7.64E-01 | no |
| Psmb2        | 50.62  | 44.24  | -0.19 | 7.64E-01 | no |
| Mettl2       | 13.90  | 12.09  | -0.20 | 7.64E-01 | no |
| Kin          | 19.08  | 16.39  | -0.22 | 7.64E-01 | no |
| Rasgrp3      | 2.77   | 2.29   | -0.28 | 7.64E-01 | no |
| Far2         | 3.40   | 2.78   | -0.29 | 7.64E-01 | no |
| Zfp457       | 0.33   | 0.21   | -0.68 | 7.64E-01 | no |
| Mag          | 0.08   | 0.03   | -1.35 | 7.64E-01 | no |
| Rnf151       | 0.19   | 0.06   | -1.76 | 7.64E-01 | no |
| Pcif1        | 32.23  | 28.85  | -0.16 | 7.64E-01 | no |
| Golga7       | 56.56  | 50.98  | -0.15 | 7.64E-01 | no |
| Snrk         | 12.25  | 13.69  | 0.16  | 7.64E-01 | no |
| Top3a        | 12.89  | 11.35  | -0.18 | 7.64E-01 | no |
| Kctd2        | 12.94  | 15.03  | 0.22  | 7.64E-01 | no |
| Btbd1        | 27.56  | 24.53  | -0.17 | 7.64E-01 | no |
| Lrrk1        | 9.24   | 10.36  | 0.17  | 7.65E-01 | no |
| Zgpat        | 23.64  | 26.42  | 0.16  | 7.65E-01 | no |
| Rps17        | 299.61 | 269.53 | -0.15 | 7.65E-01 | no |
| Mzt2         | 9.40   | 7.68   | -0.29 | 7.65E-01 | no |
| 6030446N20Ri | 4.37   | 5.30   | 0.28  | 7.65E-01 | no |
| Terc         | 1.20   | 1.78   | 0.57  | 7.65E-01 | no |
| Pycr1        | 0.45   | 0.33   | -0.47 | 7.65E-01 | no |
| Bglap        | 0.52   | 1.12   | 1.10  | 7.65E-01 | no |
| Spock2       | 0.18   | 0.26   | 0.50  | 7.65E-01 | no |
| Uba5         | 13.12  | 15.11  | 0.20  | 7.65E-01 | no |
| Rsf1         | 10.97  | 9.83   | -0.16 | 7.65E-01 | no |
| B230208H17Ri | 25.73  | 23.02  | -0.16 | 7.65E-01 | no |
| Vac14        | 21.48  | 19.11  | -0.17 | 7.65E-01 | no |
| Gm5506       | 114.99 | 102.03 | -0.17 | 7.65E-01 | no |
| Cript        | 25.45  | 21.81  | -0.22 | 7.65E-01 | no |
| Chchd6       | 12.55  | 10.50  | -0.26 | 7.65E-01 | no |
| Polr2f       | 27.41  | 22.88  | -0.26 | 7.65E-01 | no |
| Arl6         | 3.56   | 2.81   | -0.34 | 7.65E-01 | no |
| Setbp1       | 0.05   | 0.03   | -0.71 | 7.65E-01 | no |
| Grin2d       | 0.07   | 0.03   | -1.02 | 7.65E-01 | no |
| Snx16        | 1.66   | 2.13   | 0.36  | 7.65E-01 | no |

|               |       |       |       |          |    |
|---------------|-------|-------|-------|----------|----|
| Srr           | 5.54  | 6.73  | 0.28  | 7.65E-01 | no |
| BC016423      | 15.19 | 16.91 | 0.15  | 7.65E-01 | no |
| Pppde2        | 48.33 | 53.71 | 0.15  | 7.65E-01 | no |
| Ppp6c         | 39.04 | 34.42 | -0.18 | 7.65E-01 | no |
| Tspan3        | 14.05 | 11.95 | -0.23 | 7.65E-01 | no |
| Tmem56        | 0.10  | 0.05  | -0.88 | 7.65E-01 | no |
| Il17rc        | 0.11  | 0.05  | -1.24 | 7.65E-01 | no |
| 1700034H15Ri  | 0.06  | 0.02  | -1.57 | 7.65E-01 | no |
| Bik           | 0.29  | 0.49  | 0.75  | 7.65E-01 | no |
| Pten          | 57.87 | 64.47 | 0.16  | 7.65E-01 | no |
| Wdr1          | 51.33 | 46.20 | -0.15 | 7.65E-01 | no |
| Skp1a         | 67.80 | 60.61 | -0.16 | 7.65E-01 | no |
| Polr2g        | 33.12 | 28.48 | -0.22 | 7.65E-01 | no |
| Rrp36         | 16.79 | 14.29 | -0.23 | 7.65E-01 | no |
| Timm23        | 11.42 | 9.47  | -0.27 | 7.65E-01 | no |
| Scgn          | 0.19  | 0.08  | -1.26 | 7.65E-01 | no |
| E330013P04Ri  | 0.10  | 0.04  | -1.45 | 7.66E-01 | no |
| Ermap         | 0.53  | 0.69  | 0.38  | 7.66E-01 | no |
| Gemin8        | 7.71  | 6.41  | -0.27 | 7.66E-01 | no |
| Ndfip2        | 10.57 | 12.29 | 0.22  | 7.66E-01 | no |
| Chuk          | 19.84 | 17.76 | -0.16 | 7.66E-01 | no |
| Top2b         | 65.21 | 58.71 | -0.15 | 7.66E-01 | no |
| Gpc4          | 0.08  | 0.03  | -1.41 | 7.66E-01 | no |
| Uhrf2         | 30.78 | 34.28 | 0.16  | 7.66E-01 | no |
| Scp2          | 29.18 | 32.69 | 0.16  | 7.66E-01 | no |
| Etohi1        | 2.27  | 2.79  | 0.30  | 7.67E-01 | no |
| Eif1          | 44.22 | 39.01 | -0.18 | 7.67E-01 | no |
| Ap4e1         | 11.49 | 10.21 | -0.17 | 7.67E-01 | no |
| Magohb        | 10.31 | 8.31  | -0.31 | 7.67E-01 | no |
| 1110021L09Ri  | 0.19  | 0.29  | 0.63  | 7.68E-01 | no |
| 2810453I06Rik | 6.32  | 5.29  | -0.26 | 7.68E-01 | no |
| 1110001J03Rik | 19.44 | 15.83 | -0.30 | 7.68E-01 | no |
| Megf9         | 5.88  | 4.94  | -0.25 | 7.69E-01 | no |
| Gm16378       | 1.62  | 1.14  | -0.50 | 7.69E-01 | no |
| LOC100034739  | 0.07  | 0.04  | -0.91 | 7.69E-01 | no |
| Rnf216        | 24.28 | 22.16 | -0.13 | 7.69E-01 | no |
| Tmem151b      | 0.37  | 0.49  | 0.42  | 7.69E-01 | no |
| Rfx7          | 33.46 | 30.18 | -0.15 | 7.69E-01 | no |
| Vmn2r27       | 0.11  | 0.03  | -1.73 | 7.69E-01 | no |
| Nf2           | 20.16 | 18.08 | -0.16 | 7.69E-01 | no |
| Plaa          | 15.83 | 14.18 | -0.16 | 7.69E-01 | no |
| Edem1         | 24.32 | 21.88 | -0.15 | 7.69E-01 | no |

|              |       |       |       |          |    |
|--------------|-------|-------|-------|----------|----|
| Nadsyn1      | 5.07  | 6.04  | 0.25  | 7.69E-01 | no |
| Cept1        | 11.74 | 13.59 | 0.21  | 7.69E-01 | no |
| Snap47       | 4.63  | 5.63  | 0.28  | 7.70E-01 | no |
| Rab27a       | 16.90 | 14.89 | -0.18 | 7.70E-01 | no |
| Dpf1         | 0.29  | 0.20  | -0.59 | 7.70E-01 | no |
| Maff         | 0.33  | 0.21  | -0.66 | 7.70E-01 | no |
| 5730559C18Ri | 0.12  | 0.06  | -0.91 | 7.70E-01 | no |
| Akirin1      | 27.88 | 24.76 | -0.17 | 7.70E-01 | no |
| Lman1        | 23.88 | 21.41 | -0.16 | 7.70E-01 | no |
| 4930513N10Ri | 3.21  | 2.62  | -0.30 | 7.70E-01 | no |
| Plcg2        | 47.53 | 42.90 | -0.15 | 7.70E-01 | no |
| Txn2         | 46.38 | 41.20 | -0.17 | 7.70E-01 | no |
| Zfp36l3      | 0.03  | 0.10  | 1.68  | 7.71E-01 | no |
| Exd1         | 0.09  | 0.15  | 0.72  | 7.71E-01 | no |
| Fbxo25       | 4.97  | 6.01  | 0.27  | 7.71E-01 | no |
| Herpud2      | 13.44 | 15.36 | 0.19  | 7.71E-01 | no |
| Park7        | 50.87 | 44.86 | -0.18 | 7.71E-01 | no |
| Scamp4       | 17.95 | 15.55 | -0.21 | 7.71E-01 | no |
| BC019943     | 13.62 | 11.79 | -0.21 | 7.71E-01 | no |
| Snf8         | 28.76 | 24.86 | -0.21 | 7.71E-01 | no |
| Def8         | 6.47  | 5.54  | -0.22 | 7.71E-01 | no |
| Gm6644       | 15.66 | 13.32 | -0.23 | 7.71E-01 | no |
| Spats1       | 0.26  | 0.12  | -1.09 | 7.71E-01 | no |
| 4930453N24Ri | 19.59 | 16.78 | -0.22 | 7.71E-01 | no |
| Gm5124       | 1.76  | 1.38  | -0.35 | 7.71E-01 | no |
| Tax1bp3      | 17.07 | 19.81 | 0.21  | 7.72E-01 | no |
| Cib2         | 0.29  | 0.53  | 0.86  | 7.72E-01 | no |
| Bckdhb       | 6.15  | 7.51  | 0.29  | 7.72E-01 | no |
| Fam117a      | 25.77 | 28.90 | 0.17  | 7.72E-01 | no |
| Ghrl         | 0.47  | 0.80  | 0.79  | 7.72E-01 | no |
| Poldip2      | 22.73 | 20.02 | -0.18 | 7.72E-01 | no |
| Jam3         | 1.27  | 0.97  | -0.39 | 7.72E-01 | no |
| Lass3        | 0.06  | 0.02  | -1.43 | 7.72E-01 | no |
| Mettl8       | 9.86  | 11.43 | 0.21  | 7.72E-01 | no |
| Arsb         | 12.39 | 10.91 | -0.18 | 7.72E-01 | no |
| Ppp4c        | 51.10 | 45.59 | -0.16 | 7.72E-01 | no |
| Extl1        | 0.06  | 0.03  | -1.23 | 7.72E-01 | no |
| Fam194a      | 0.04  | 0.12  | 1.49  | 7.72E-01 | no |
| Glipr1       | 6.58  | 8.08  | 0.30  | 7.72E-01 | no |
| Vps11        | 17.51 | 19.67 | 0.17  | 7.72E-01 | no |
| 2310044G17Ri | 17.49 | 19.46 | 0.15  | 7.72E-01 | no |
| Golga2       | 16.28 | 18.01 | 0.15  | 7.72E-01 | no |

|              |       |       |       |          |    |
|--------------|-------|-------|-------|----------|----|
| Malt1        | 15.28 | 13.63 | -0.17 | 7.72E-01 | no |
| Oxsr1        | 17.35 | 15.07 | -0.20 | 7.72E-01 | no |
| 3110056O03Ri | 10.91 | 9.47  | -0.20 | 7.72E-01 | no |
| 3110001D03Ri | 30.47 | 25.92 | -0.23 | 7.72E-01 | no |
| Arl10        | 5.72  | 4.60  | -0.31 | 7.72E-01 | no |
| Ypel5        | 14.15 | 16.21 | 0.20  | 7.72E-01 | no |
| Gpn1         | 14.45 | 12.44 | -0.22 | 7.72E-01 | no |
| Cyp26c1      | 0.16  | 0.07  | -1.22 | 7.72E-01 | no |
| Slc46a1      | 1.04  | 1.35  | 0.38  | 7.73E-01 | no |
| Riok1        | 20.03 | 17.67 | -0.18 | 7.73E-01 | no |
| Ubl7         | 26.00 | 29.46 | 0.18  | 7.73E-01 | no |
| 4930588N13Ri | 0.27  | 0.14  | -0.98 | 7.73E-01 | no |
| Plagl1       | 0.03  | 0.06  | 1.16  | 7.73E-01 | no |
| Mboat1       | 0.26  | 0.37  | 0.51  | 7.73E-01 | no |
| Tubb4        | 0.55  | 0.74  | 0.44  | 7.73E-01 | no |
| Elac1        | 3.30  | 3.92  | 0.25  | 7.73E-01 | no |
| Wars2        | 4.13  | 4.86  | 0.24  | 7.73E-01 | no |
| Apbb3        | 10.24 | 11.91 | 0.22  | 7.73E-01 | no |
| Tet3         | 19.28 | 21.36 | 0.15  | 7.73E-01 | no |
| Anapc7       | 23.86 | 21.27 | -0.17 | 7.73E-01 | no |
| Metap1       | 21.23 | 18.75 | -0.18 | 7.73E-01 | no |
| Tsg101       | 26.52 | 23.31 | -0.19 | 7.73E-01 | no |
| Bcl10        | 22.46 | 19.62 | -0.20 | 7.73E-01 | no |
| Vamp8        | 35.88 | 31.14 | -0.20 | 7.73E-01 | no |
| Ccnj         | 9.16  | 7.95  | -0.20 | 7.73E-01 | no |
| Tceb1        | 34.31 | 29.52 | -0.22 | 7.73E-01 | no |
| Pgm3         | 4.21  | 3.39  | -0.31 | 7.73E-01 | no |
| Ldlrad1      | 0.08  | 0.24  | 1.67  | 7.73E-01 | no |
| Zfand2b      | 12.98 | 15.07 | 0.22  | 7.73E-01 | no |
| Sh3rf1       | 5.54  | 6.38  | 0.20  | 7.73E-01 | no |
| Tmem43       | 15.78 | 13.89 | -0.18 | 7.73E-01 | no |
| LOC100270707 | 0.09  | 0.18  | 0.97  | 7.74E-01 | no |
| Slc16a5      | 0.09  | 0.16  | 0.78  | 7.74E-01 | no |
| Map3k6       | 0.10  | 0.14  | 0.59  | 7.74E-01 | no |
| Zfp558       | 1.14  | 1.44  | 0.34  | 7.74E-01 | no |
| Apoo-ps      | 4.55  | 3.49  | -0.38 | 7.74E-01 | no |
| Sdf2         | 21.56 | 24.83 | 0.20  | 7.74E-01 | no |
| Gm889        | 2.51  | 1.94  | -0.37 | 7.74E-01 | no |
| Gtf3c6       | 19.94 | 16.95 | -0.23 | 7.74E-01 | no |
| Lcmt2        | 5.76  | 6.75  | 0.23  | 7.74E-01 | no |
| Homer1       | 4.18  | 3.50  | -0.26 | 7.74E-01 | no |
| Rrn3         | 18.73 | 16.68 | -0.17 | 7.74E-01 | no |

|               |        |        |       |          |    |
|---------------|--------|--------|-------|----------|----|
| Tcfap4        | 14.82  | 12.89  | -0.20 | 7.74E-01 | no |
| Ccdc14        | 7.63   | 6.61   | -0.21 | 7.74E-01 | no |
| 0610012G03Ri  | 12.09  | 10.22  | -0.24 | 7.74E-01 | no |
| Anks3         | 13.02  | 14.85  | 0.19  | 7.75E-01 | no |
| Elf2          | 38.07  | 34.22  | -0.15 | 7.75E-01 | no |
| Fbxl3         | 19.79  | 22.12  | 0.16  | 7.75E-01 | no |
| Fut7          | 0.14   | 0.28   | 1.03  | 7.75E-01 | no |
| Fto           | 21.62  | 19.35  | -0.16 | 7.75E-01 | no |
| Zfp692-ps     | 15.28  | 13.36  | -0.19 | 7.75E-01 | no |
| Rpusd1        | 10.75  | 9.13   | -0.24 | 7.75E-01 | no |
| Trib2         | 16.09  | 14.28  | -0.17 | 7.75E-01 | no |
| Rln3          | 0.16   | 0.43   | 1.48  | 7.75E-01 | no |
| 1700001O22Ri  | 0.15   | 0.27   | 0.87  | 7.75E-01 | no |
| Ccr1          | 0.34   | 0.48   | 0.52  | 7.75E-01 | no |
| 2410002I01Rik | 8.17   | 9.45   | 0.21  | 7.75E-01 | no |
| Ttc17         | 8.69   | 9.85   | 0.18  | 7.75E-01 | no |
| Cd79a         | 453.86 | 508.71 | 0.16  | 7.75E-01 | no |
| Mrps28        | 23.31  | 19.73  | -0.24 | 7.75E-01 | no |
| F8a           | 5.34   | 4.43   | -0.27 | 7.75E-01 | no |
| Ramp2         | 0.56   | 0.33   | -0.76 | 7.75E-01 | no |
| Tmc3          | 0.25   | 0.35   | 0.45  | 7.75E-01 | no |
| Rab5c         | 53.45  | 59.49  | 0.15  | 7.75E-01 | no |
| Tgoln1,Tgoln2 | 22.98  | 25.55  | 0.15  | 7.75E-01 | no |
| Ints6         | 11.70  | 10.37  | -0.17 | 7.75E-01 | no |
| Slc23a1       | 3.25   | 2.67   | -0.28 | 7.75E-01 | no |
| Pdzd9         | 0.19   | 0.06   | -1.68 | 7.75E-01 | no |
| Slc5a5        | 0.15   | 0.09   | -0.79 | 7.76E-01 | no |
| Snupn         | 6.49   | 5.30   | -0.29 | 7.76E-01 | no |
| Abi1          | 54.47  | 50.32  | -0.11 | 7.76E-01 | no |
| Vdac1         | 59.76  | 53.77  | -0.15 | 7.76E-01 | no |
| 4930467E23Ri  | 0.15   | 0.07   | -1.12 | 7.76E-01 | no |
| Alkbh2        | 4.36   | 3.49   | -0.32 | 7.76E-01 | no |
| Chtf8         | 63.85  | 57.72  | -0.15 | 7.77E-01 | no |
| 3110082I17Rik | 12.34  | 10.01  | -0.30 | 7.77E-01 | no |
| Gm221         | 0.08   | 0.15   | 0.88  | 7.77E-01 | no |
| Fam158a       | 0.68   | 0.99   | 0.54  | 7.77E-01 | no |
| Tpk1          | 3.77   | 4.58   | 0.28  | 7.77E-01 | no |
| Vasp          | 31.54  | 35.20  | 0.16  | 7.77E-01 | no |
| Gga1          | 21.14  | 23.58  | 0.16  | 7.77E-01 | no |
| Tollip        | 22.98  | 25.61  | 0.16  | 7.77E-01 | no |
| 2900002K06Ri  | 2.09   | 1.56   | -0.42 | 7.77E-01 | no |
| Grk1          | 0.03   | 0.01   | -1.37 | 7.77E-01 | no |

|              |       |       |       |          |    |
|--------------|-------|-------|-------|----------|----|
| Med25        | 22.30 | 19.80 | -0.17 | 7.77E-01 | no |
| 1700001P01Ri | 0.25  | 0.53  | 1.08  | 7.77E-01 | no |
| H2-Q10       | 0.13  | 0.23  | 0.83  | 7.78E-01 | no |
| Pdcd11       | 17.79 | 16.03 | -0.15 | 7.78E-01 | no |
| Agfg1        | 30.08 | 27.00 | -0.16 | 7.78E-01 | no |
| Scand3       | 16.79 | 14.74 | -0.19 | 7.78E-01 | no |
| Gm600        | 0.08  | 0.03  | -1.68 | 7.78E-01 | no |
| 2400003C14Ri | 43.26 | 38.88 | -0.15 | 7.78E-01 | no |
| Pigs         | 18.72 | 21.10 | 0.17  | 7.78E-01 | no |
| 3-Mar        | 0.52  | 0.36  | -0.51 | 7.78E-01 | no |
| Ankrd45      | 0.10  | 0.05  | -0.91 | 7.78E-01 | no |
| Parp6        | 10.02 | 11.55 | 0.20  | 7.78E-01 | no |
| Trim25       | 45.57 | 41.20 | -0.15 | 7.78E-01 | no |
| Mapk1ip1     | 16.90 | 19.51 | 0.21  | 7.78E-01 | no |
| Rexo1        | 25.99 | 23.48 | -0.15 | 7.78E-01 | no |
| B430306N03Ri | 0.58  | 0.75  | 0.39  | 7.79E-01 | no |
| Pabpc1l      | 0.10  | 0.17  | 0.81  | 7.79E-01 | no |
| Rims3        | 0.84  | 1.16  | 0.46  | 7.79E-01 | no |
| Hsd17b4      | 18.40 | 20.76 | 0.17  | 7.79E-01 | no |
| Il17ra       | 55.11 | 49.74 | -0.15 | 7.79E-01 | no |
| Btaf1        | 14.36 | 12.94 | -0.15 | 7.79E-01 | no |
| Psm7         | 61.07 | 54.23 | -0.17 | 7.79E-01 | no |
| Jag2         | 3.52  | 2.95  | -0.25 | 7.79E-01 | no |
| Trdmt1       | 5.98  | 5.00  | -0.26 | 7.79E-01 | no |
| E330016A19Ri | 0.92  | 0.71  | -0.38 | 7.79E-01 | no |
| Ap1g1        | 25.86 | 23.24 | -0.15 | 7.79E-01 | no |
| Dapk2        | 0.04  | 0.11  | 1.46  | 7.79E-01 | no |
| Crocc        | 9.24  | 8.36  | -0.15 | 7.79E-01 | no |
| Smc5         | 24.02 | 21.54 | -0.16 | 7.79E-01 | no |
| B4galt7      | 11.73 | 9.99  | -0.23 | 7.79E-01 | no |
| Polr3d       | 7.68  | 8.96  | 0.22  | 7.79E-01 | no |
| Rap2b        | 10.88 | 9.57  | -0.19 | 7.79E-01 | no |
| 1110006O24Ri | 1.64  | 2.19  | 0.42  | 7.79E-01 | no |
| Gcsh         | 20.71 | 17.86 | -0.21 | 7.79E-01 | no |
| Rpl31        | 10.67 | 8.82  | -0.28 | 7.79E-01 | no |
| Ubr5         | 26.50 | 24.57 | -0.11 | 7.80E-01 | no |
| Supt5h       | 43.81 | 39.64 | -0.14 | 7.80E-01 | no |
| Ndufs3       | 45.69 | 40.19 | -0.18 | 7.80E-01 | no |
| Timm10       | 14.04 | 11.58 | -0.28 | 7.80E-01 | no |
| Akt2         | 40.85 | 37.37 | -0.13 | 7.80E-01 | no |
| Acvr1b       | 9.11  | 7.90  | -0.21 | 7.80E-01 | no |
| Arl4c        | 9.16  | 8.01  | -0.19 | 7.81E-01 | no |



|               |       |       |       |          |    |
|---------------|-------|-------|-------|----------|----|
| Sox13         | 1.26  | 1.56  | 0.32  | 7.81E-01 | no |
| Mrpl52        | 30.14 | 25.11 | -0.26 | 7.81E-01 | no |
| Setdb2        | 9.15  | 7.89  | -0.21 | 7.81E-01 | no |
| Dagla         | 0.06  | 0.03  | -0.91 | 7.81E-01 | no |
| Spin1         | 37.73 | 34.31 | -0.14 | 7.81E-01 | no |
| Tjap1         | 17.34 | 19.51 | 0.17  | 7.81E-01 | no |
| Siae          | 6.89  | 5.90  | -0.22 | 7.81E-01 | no |
| Cbwd1         | 7.55  | 6.36  | -0.25 | 7.81E-01 | no |
| Cox7a1        | 2.36  | 3.25  | 0.46  | 7.82E-01 | no |
| 4921513D23Ri  | 27.65 | 30.57 | 0.14  | 7.82E-01 | no |
| Olfml3        | 0.12  | 0.21  | 0.83  | 7.82E-01 | no |
| Trim26        | 16.67 | 18.67 | 0.16  | 7.82E-01 | no |
| Ubn1          | 33.33 | 36.82 | 0.14  | 7.82E-01 | no |
| Hipk3         | 24.24 | 22.29 | -0.12 | 7.82E-01 | no |
| Phpt1         | 27.80 | 23.55 | -0.24 | 7.82E-01 | no |
| Casp7         | 18.98 | 16.75 | -0.18 | 7.82E-01 | no |
| Nup98         | 23.88 | 21.48 | -0.15 | 7.82E-01 | no |
| Pygm          | 3.17  | 3.83  | 0.27  | 7.82E-01 | no |
| Gpld1         | 11.20 | 9.94  | -0.17 | 7.82E-01 | no |
| 2310016M24R   | 22.80 | 26.66 | 0.23  | 7.83E-01 | no |
| Arfgef2       | 15.88 | 17.55 | 0.14  | 7.83E-01 | no |
| Fbln1         | 0.18  | 0.26  | 0.52  | 7.83E-01 | no |
| Mrpl22        | 11.56 | 9.50  | -0.28 | 7.83E-01 | no |
| Haa0          | 4.11  | 5.07  | 0.31  | 7.83E-01 | no |
| Rhbdd2        | 4.69  | 5.46  | 0.22  | 7.83E-01 | no |
| Safb2         | 42.05 | 38.05 | -0.14 | 7.83E-01 | no |
| Stt3a         | 45.95 | 41.41 | -0.15 | 7.83E-01 | no |
| Pcmt1         | 24.87 | 21.97 | -0.18 | 7.83E-01 | no |
| 2410022L05Ril | 0.63  | 0.39  | -0.68 | 7.83E-01 | no |
| Rbpjl         | 0.18  | 0.10  | -0.78 | 7.83E-01 | no |
| Crkl          | 36.01 | 32.53 | -0.15 | 7.83E-01 | no |
| 2810403A07Ri  | 30.17 | 27.11 | -0.15 | 7.83E-01 | no |
| Cth           | 0.46  | 0.31  | -0.56 | 7.83E-01 | no |
| Anxa9         | 0.61  | 1.68  | 1.45  | 7.83E-01 | no |
| Galr2         | 0.34  | 0.48  | 0.51  | 7.83E-01 | no |
| Cd200r4       | 0.07  | 0.19  | 1.41  | 7.83E-01 | no |
| Akr1e1        | 7.19  | 8.59  | 0.26  | 7.83E-01 | no |
| Trcg1         | 0.07  | 0.03  | -1.34 | 7.83E-01 | no |
| Cetn4         | 1.32  | 0.97  | -0.45 | 7.83E-01 | no |
| Tmem184b      | 9.61  | 10.95 | 0.19  | 7.84E-01 | no |
| Ythdf3        | 36.19 | 33.51 | -0.11 | 7.84E-01 | no |
| Wdr77         | 22.26 | 19.94 | -0.16 | 7.84E-01 | no |

|              |        |        |       |          |    |
|--------------|--------|--------|-------|----------|----|
| Slc25a15     | 9.39   | 8.16   | -0.20 | 7.84E-01 | no |
| Map6d1       | 0.10   | 0.17   | 0.69  | 7.84E-01 | no |
| Otud4        | 37.57  | 34.04  | -0.14 | 7.84E-01 | no |
| Ilk          | 39.54  | 35.81  | -0.14 | 7.84E-01 | no |
| 6530418L21Ri | 1.00   | 1.25   | 0.33  | 7.84E-01 | no |
| Serhl        | 10.98  | 12.89  | 0.23  | 7.84E-01 | no |
| Tmem186      | 16.70  | 14.78  | -0.18 | 7.85E-01 | no |
| Ltv1         | 19.34  | 16.94  | -0.19 | 7.85E-01 | no |
| Rpl23        | 417.99 | 377.88 | -0.15 | 7.85E-01 | no |
| Parg         | 18.44  | 16.56  | -0.16 | 7.85E-01 | no |
| Ube2j1       | 39.91  | 44.14  | 0.15  | 7.85E-01 | no |
| Zfp238       | 61.20  | 56.59  | -0.11 | 7.85E-01 | no |
| Gtf2h3       | 13.52  | 11.85  | -0.19 | 7.85E-01 | no |
| Adamts6      | 2.54   | 3.03   | 0.26  | 7.85E-01 | no |
| Kcnk4        | 0.06   | 0.15   | 1.21  | 7.85E-01 | no |
| Vsig2        | 1.22   | 1.62   | 0.40  | 7.85E-01 | no |
| Kat2b        | 16.22  | 17.93  | 0.14  | 7.85E-01 | no |
| Stat3        | 19.75  | 21.68  | 0.13  | 7.85E-01 | no |
| Pfkl         | 16.00  | 14.30  | -0.16 | 7.85E-01 | no |
| Zdhhc3       | 9.70   | 8.67   | -0.16 | 7.85E-01 | no |
| Ddx10        | 17.19  | 15.32  | -0.17 | 7.85E-01 | no |
| Aprt         | 25.64  | 22.06  | -0.22 | 7.85E-01 | no |
| Eif4ebp1     | 21.55  | 18.52  | -0.22 | 7.85E-01 | no |
| Elovl7       | 0.12   | 0.18   | 0.53  | 7.85E-01 | no |
| Hint2        | 10.61  | 12.94  | 0.29  | 7.85E-01 | no |
| Serp2        | 0.50   | 0.27   | -0.91 | 7.85E-01 | no |
| D030028A08R  | 2.88   | 3.47   | 0.27  | 7.86E-01 | no |
| Dicer1       | 21.25  | 19.26  | -0.14 | 7.86E-01 | no |
| Slc20a2      | 10.55  | 9.27   | -0.19 | 7.86E-01 | no |
| 5430416N02Ri | 10.69  | 8.70   | -0.30 | 7.86E-01 | no |
| Efemp2       | 0.14   | 0.05   | -1.64 | 7.86E-01 | no |
| Ncam1        | 0.04   | 0.08   | 0.89  | 7.86E-01 | no |
| 2410001C21Ri | 32.13  | 28.83  | -0.16 | 7.86E-01 | no |
| Aim1l        | 0.50   | 0.39   | -0.37 | 7.86E-01 | no |
| Smpd2        | 7.53   | 8.94   | 0.25  | 7.87E-01 | no |
| Lnpep        | 33.24  | 30.08  | -0.14 | 7.87E-01 | no |
| Zfp628       | 9.95   | 8.74   | -0.19 | 7.87E-01 | no |
| Ube2v2       | 5.05   | 4.36   | -0.21 | 7.87E-01 | no |
| Arhgap39     | 2.12   | 1.76   | -0.27 | 7.87E-01 | no |
| Itga10       | 1.33   | 1.08   | -0.29 | 7.87E-01 | no |
| Pcgf3        | 14.00  | 12.41  | -0.17 | 7.87E-01 | no |
| Slc25a45     | 10.61  | 12.31  | 0.22  | 7.87E-01 | no |

|               |       |       |       |          |    |
|---------------|-------|-------|-------|----------|----|
| Eif3i         | 45.90 | 40.87 | -0.17 | 7.87E-01 | no |
| Zcchc9        | 16.21 | 13.97 | -0.21 | 7.87E-01 | no |
| Fhdc1         | 0.07  | 0.04  | -0.93 | 7.87E-01 | no |
| Prkca         | 9.93  | 11.03 | 0.15  | 7.87E-01 | no |
| Man2c1        | 16.44 | 18.38 | 0.16  | 7.87E-01 | no |
| Myst3         | 31.08 | 28.17 | -0.14 | 7.87E-01 | no |
| Ryr2          | 0.02  | 0.04  | 0.64  | 7.87E-01 | no |
| Ccdc32        | 10.21 | 11.86 | 0.22  | 7.87E-01 | no |
| Dpcd          | 11.12 | 9.39  | -0.24 | 7.87E-01 | no |
| Zfp770        | 8.24  | 7.17  | -0.20 | 7.88E-01 | no |
| Nkapl         | 0.27  | 0.41  | 0.64  | 7.88E-01 | no |
| Snx1          | 35.12 | 31.54 | -0.15 | 7.88E-01 | no |
| Sar1b         | 21.63 | 18.68 | -0.21 | 7.88E-01 | no |
| Fam163b       | 0.02  | 0.06  | 1.44  | 7.88E-01 | no |
| Dixdc1        | 0.12  | 0.17  | 0.50  | 7.88E-01 | no |
| Arhgef10      | 0.72  | 0.91  | 0.34  | 7.88E-01 | no |
| Tk2           | 13.48 | 15.34 | 0.19  | 7.88E-01 | no |
| Casp2         | 44.85 | 40.60 | -0.14 | 7.88E-01 | no |
| Dhx16         | 29.55 | 26.71 | -0.15 | 7.88E-01 | no |
| Stk16         | 19.84 | 17.69 | -0.16 | 7.88E-01 | no |
| Uhrf1bp1      | 1.81  | 1.53  | -0.24 | 7.88E-01 | no |
| Scand1        | 28.65 | 32.97 | 0.20  | 7.88E-01 | no |
| Slc16a8       | 0.06  | 0.15  | 1.20  | 7.88E-01 | no |
| Farsa         | 27.67 | 24.64 | -0.17 | 7.88E-01 | no |
| Mtrnr2l       | 27.20 | 33.01 | 0.28  | 7.88E-01 | no |
| Tmem18        | 12.31 | 14.02 | 0.19  | 7.88E-01 | no |
| Snn           | 94.12 | 85.36 | -0.14 | 7.88E-01 | no |
| AA408296      | 7.42  | 6.54  | -0.18 | 7.88E-01 | no |
| Exosc10       | 27.32 | 24.59 | -0.15 | 7.88E-01 | no |
| Atp1a3        | 0.91  | 1.16  | 0.34  | 7.89E-01 | no |
| Mylk          | 3.30  | 3.77  | 0.19  | 7.89E-01 | no |
| Pign          | 9.62  | 10.94 | 0.19  | 7.89E-01 | no |
| Abca3         | 13.55 | 14.90 | 0.14  | 7.89E-01 | no |
| Gm13315       | 0.93  | 0.70  | -0.41 | 7.89E-01 | no |
| 1500032L24Ril | 53.44 | 46.85 | -0.19 | 7.89E-01 | no |
| Itpripl1      | 9.31  | 8.17  | -0.19 | 7.89E-01 | no |
| Snx15         | 9.00  | 7.60  | -0.24 | 7.89E-01 | no |
| Kat5          | 25.03 | 22.59 | -0.15 | 7.89E-01 | no |
| Cd46          | 1.33  | 1.76  | 0.40  | 7.89E-01 | no |
| 6-Mar         | 25.35 | 22.94 | -0.14 | 7.89E-01 | no |
| Grin2c        | 0.02  | 0.04  | 1.42  | 7.89E-01 | no |
| Erc3          | 18.92 | 16.84 | -0.17 | 7.89E-01 | no |

|              |        |        |       |          |    |
|--------------|--------|--------|-------|----------|----|
| Tmod4        | 0.63   | 0.86   | 0.45  | 7.89E-01 | no |
| Mtap1s       | 15.70  | 13.99  | -0.17 | 7.89E-01 | no |
| Trim7        | 5.57   | 4.58   | -0.28 | 7.89E-01 | no |
| Plac8        | 94.86  | 105.79 | 0.16  | 7.90E-01 | no |
| Ebf1         | 66.05  | 59.81  | -0.14 | 7.90E-01 | no |
| Fam154b      | 0.07   | 0.13   | 0.92  | 7.90E-01 | no |
| Acyp1        | 14.43  | 17.29  | 0.26  | 7.90E-01 | no |
| Zbtb24       | 9.70   | 11.08  | 0.19  | 7.90E-01 | no |
| Prim2        | 30.23  | 33.75  | 0.16  | 7.90E-01 | no |
| Rint1        | 9.67   | 8.45   | -0.20 | 7.90E-01 | no |
| Tcap         | 0.34   | 0.18   | -0.90 | 7.90E-01 | no |
| Prkci        | 12.09  | 10.74  | -0.17 | 7.90E-01 | no |
| Plekha8      | 1.07   | 1.30   | 0.29  | 7.90E-01 | no |
| Krit1        | 13.59  | 12.36  | -0.14 | 7.90E-01 | no |
| Sqle         | 11.66  | 10.15  | -0.20 | 7.91E-01 | no |
| Rhou         | 0.09   | 0.14   | 0.72  | 7.91E-01 | no |
| Rnf215       | 5.81   | 6.88   | 0.25  | 7.91E-01 | no |
| 2410004A20Ri | 0.15   | 0.25   | 0.74  | 7.91E-01 | no |
| 1700030C10Ri | 0.39   | 0.54   | 0.50  | 7.91E-01 | no |
| Zmat3        | 0.75   | 0.92   | 0.30  | 7.91E-01 | no |
| Fam63a       | 8.53   | 9.74   | 0.19  | 7.91E-01 | no |
| Rps14        | 390.97 | 430.58 | 0.14  | 7.91E-01 | no |
| Samd8        | 4.62   | 4.01   | -0.20 | 7.91E-01 | no |
| Bbs1         | 2.87   | 2.44   | -0.24 | 7.91E-01 | no |
| Ccdc46       | 0.11   | 0.06   | -0.86 | 7.91E-01 | no |
| Fndc7        | 0.04   | 0.07   | 1.02  | 7.91E-01 | no |
| Epc2         | 16.86  | 15.11  | -0.16 | 7.91E-01 | no |
| Fut8         | 19.62  | 21.93  | 0.16  | 7.91E-01 | no |
| Fcgrt        | 0.56   | 0.76   | 0.44  | 7.91E-01 | no |
| Mpg          | 7.21   | 8.53   | 0.24  | 7.91E-01 | no |
| Zcchc3       | 7.50   | 8.63   | 0.20  | 7.91E-01 | no |
| Ppp3cc       | 20.29  | 22.91  | 0.18  | 7.91E-01 | no |
| Recql5       | 12.58  | 11.16  | -0.17 | 7.91E-01 | no |
| Ddx31        | 7.54   | 6.53   | -0.21 | 7.91E-01 | no |
| Als2cr4      | 1.50   | 1.12   | -0.41 | 7.91E-01 | no |
| Lrrc67       | 0.20   | 0.08   | -1.26 | 7.91E-01 | no |
| Ggcx         | 6.24   | 5.31   | -0.23 | 7.92E-01 | no |
| Ifitm6       | 0.76   | 1.18   | 0.64  | 7.92E-01 | no |
| Vsx1         | 0.05   | 0.02   | -1.31 | 7.92E-01 | no |
| Slc2a4       | 0.07   | 0.03   | -1.31 | 7.92E-01 | no |
| AW146154     | 3.90   | 4.63   | 0.25  | 7.92E-01 | no |
| Sync         | 0.09   | 0.03   | -1.57 | 7.92E-01 | no |

|              |        |       |       |          |    |
|--------------|--------|-------|-------|----------|----|
| Grm6         | 0.02   | 0.04  | 1.42  | 7.93E-01 | no |
| Pigx         | 14.25  | 16.75 | 0.23  | 7.93E-01 | no |
| Aurkaip1     | 39.26  | 34.41 | -0.19 | 7.93E-01 | no |
| 6330408A02Ri | 2.60   | 2.16  | -0.27 | 7.93E-01 | no |
| 4930503E24Ri | 9.01   | 7.56  | -0.25 | 7.93E-01 | no |
| Znrf1        | 30.84  | 34.05 | 0.14  | 7.93E-01 | no |
| Gtf3a        | 33.13  | 29.39 | -0.17 | 7.93E-01 | no |
| D930015E06Ri | 59.42  | 53.99 | -0.14 | 7.93E-01 | no |
| Tars         | 23.91  | 21.44 | -0.16 | 7.93E-01 | no |
| Mrpl17       | 5.18   | 4.52  | -0.20 | 7.93E-01 | no |
| Cct8l1       | 0.03   | 0.09  | 1.41  | 7.94E-01 | no |
| 1810013D10Ri | 26.13  | 29.98 | 0.20  | 7.94E-01 | no |
| Tceb3        | 20.35  | 18.38 | -0.15 | 7.94E-01 | no |
| Timm44       | 25.21  | 22.44 | -0.17 | 7.94E-01 | no |
| Ndufa2       | 48.79  | 42.39 | -0.20 | 7.94E-01 | no |
| Ccdc76       | 5.36   | 4.55  | -0.23 | 7.94E-01 | no |
| Tarbp1       | 31.65  | 28.69 | -0.14 | 7.94E-01 | no |
| Rasl10b      | 0.02   | 0.06  | 1.57  | 7.94E-01 | no |
| Tmem74       | 0.13   | 0.25  | 0.89  | 7.94E-01 | no |
| Psmb10       | 28.84  | 32.53 | 0.17  | 7.94E-01 | no |
| Pcbp1        | 108.63 | 98.75 | -0.14 | 7.94E-01 | no |
| Gnai2        | 98.76  | 89.76 | -0.14 | 7.94E-01 | no |
| Setd3        | 29.99  | 27.01 | -0.15 | 7.94E-01 | no |
| Ppme1        | 17.63  | 15.59 | -0.18 | 7.94E-01 | no |
| Erp27        | 2.08   | 1.59  | -0.39 | 7.94E-01 | no |
| Chi3l4       | 0.45   | 0.64  | 0.50  | 7.94E-01 | no |
| 1810008A18Ri | 17.44  | 19.57 | 0.17  | 7.94E-01 | no |
| Zfp184       | 2.73   | 2.24  | -0.29 | 7.94E-01 | no |
| Stx11        | 1.34   | 1.02  | -0.39 | 7.94E-01 | no |
| 3110049J23Ri | 0.09   | 0.16  | 0.83  | 7.94E-01 | no |
| Ankrd39      | 7.14   | 8.44  | 0.24  | 7.94E-01 | no |
| Drg2         | 20.49  | 18.05 | -0.18 | 7.94E-01 | no |
| Gpx2         | 0.17   | 0.04  | -2.22 | 7.94E-01 | no |
| Zfp661       | 2.44   | 2.95  | 0.27  | 7.94E-01 | no |
| Ik           | 40.75  | 36.78 | -0.15 | 7.94E-01 | no |
| Brix1        | 22.08  | 19.73 | -0.16 | 7.94E-01 | no |
| Efnb3        | 0.85   | 0.66  | -0.35 | 7.94E-01 | no |
| Kbtbd13      | 0.27   | 0.19  | -0.52 | 7.94E-01 | no |
| Itпка        | 1.28   | 1.00  | -0.37 | 7.94E-01 | no |
| Flt4         | 0.03   | 0.06  | 0.85  | 7.94E-01 | no |
| Calhm2       | 4.74   | 5.68  | 0.26  | 7.94E-01 | no |
| Il22ra2      | 0.03   | 0.08  | 1.50  | 7.95E-01 | no |

|               |        |        |       |          |    |
|---------------|--------|--------|-------|----------|----|
| Nr2c1         | 2.41   | 2.90   | 0.27  | 7.95E-01 | no |
| Eif4g3        | 30.47  | 27.70  | -0.14 | 7.95E-01 | no |
| Znhit6        | 5.48   | 4.65   | -0.24 | 7.95E-01 | no |
| 1500001M20R   | 11.96  | 10.12  | -0.24 | 7.95E-01 | no |
| Popdc3        | 0.16   | 0.08   | -0.94 | 7.95E-01 | no |
| Trim11        | 46.92  | 51.74  | 0.14  | 7.95E-01 | no |
| Fcho1         | 78.99  | 73.01  | -0.11 | 7.95E-01 | no |
| Atad2b        | 17.41  | 15.79  | -0.14 | 7.95E-01 | no |
| Polrmt        | 15.62  | 14.01  | -0.16 | 7.95E-01 | no |
| Cdc73         | 18.83  | 16.72  | -0.17 | 7.95E-01 | no |
| D6Wsu163e     | 13.99  | 12.25  | -0.19 | 7.95E-01 | no |
| Bud31         | 37.88  | 32.97  | -0.20 | 7.95E-01 | no |
| Tff1          | 0.27   | 0.62   | 1.20  | 7.95E-01 | no |
| Npb           | 0.32   | 0.59   | 0.89  | 7.95E-01 | no |
| Blcap         | 9.20   | 10.72  | 0.22  | 7.95E-01 | no |
| Psenen        | 37.24  | 42.74  | 0.20  | 7.95E-01 | no |
| Slc9a7        | 11.29  | 9.80   | -0.20 | 7.95E-01 | no |
| Abca6         | 0.17   | 0.10   | -0.85 | 7.95E-01 | no |
| Atp5j2        | 68.42  | 60.07  | -0.19 | 7.95E-01 | no |
| Neu3          | 2.50   | 3.01   | 0.27  | 7.95E-01 | no |
| Tradd         | 19.41  | 22.13  | 0.19  | 7.95E-01 | no |
| Setdb1        | 25.41  | 23.26  | -0.13 | 7.95E-01 | no |
| Ggt1          | 0.12   | 0.21   | 0.79  | 7.95E-01 | no |
| Pkd2          | 0.06   | 0.09   | 0.69  | 7.95E-01 | no |
| Gcnt7         | 0.27   | 0.38   | 0.49  | 7.95E-01 | no |
| Cdhr4         | 1.74   | 2.25   | 0.37  | 7.95E-01 | no |
| Hnrnpf        | 157.10 | 148.08 | -0.09 | 7.95E-01 | no |
| Eif4b         | 77.85  | 70.82  | -0.14 | 7.95E-01 | no |
| Ube2d3        | 88.02  | 80.00  | -0.14 | 7.95E-01 | no |
| Lbh           | 49.98  | 45.37  | -0.14 | 7.95E-01 | no |
| Cd5l          | 0.14   | 0.07   | -1.05 | 7.95E-01 | no |
| Cela1         | 0.19   | 0.06   | -1.61 | 7.95E-01 | no |
| Dnajc18       | 5.75   | 5.01   | -0.20 | 7.96E-01 | no |
| Ddhd2         | 6.07   | 6.96   | 0.20  | 7.96E-01 | no |
| Phf23         | 21.42  | 23.96  | 0.16  | 7.96E-01 | no |
| Zmynd8        | 22.18  | 24.47  | 0.14  | 7.96E-01 | no |
| Plekhm1       | 24.17  | 21.94  | -0.14 | 7.96E-01 | no |
| Tprkb         | 9.87   | 8.50   | -0.22 | 7.96E-01 | no |
| 1110031I02Rik | 5.73   | 4.71   | -0.28 | 7.96E-01 | no |
| Nudt13        | 5.34   | 6.29   | 0.24  | 7.96E-01 | no |
| Lca5l         | 0.07   | 0.03   | -1.16 | 7.96E-01 | no |
| 2810474O19Ri  | 20.07  | 22.15  | 0.14  | 7.96E-01 | no |

|          |       |       |       |          |    |
|----------|-------|-------|-------|----------|----|
| Zfp51    | 8.51  | 9.85  | 0.21  | 7.96E-01 | no |
| Jun      | 6.24  | 7.21  | 0.21  | 7.96E-01 | no |
| Dand5    | 1.59  | 2.04  | 0.36  | 7.96E-01 | no |
| Fkbp1b   | 0.16  | 0.31  | 0.96  | 7.97E-01 | no |
| Slc36a2  | 0.13  | 0.21  | 0.66  | 7.97E-01 | no |
| Rem2     | 2.51  | 3.08  | 0.29  | 7.97E-01 | no |
| Ppp1r9a  | 0.90  | 1.08  | 0.27  | 7.97E-01 | no |
| Fam169b  | 4.57  | 5.39  | 0.24  | 7.97E-01 | no |
| AW146020 | 6.13  | 7.09  | 0.21  | 7.97E-01 | no |
| Cachd1   | 0.04  | 0.01  | -1.58 | 7.97E-01 | no |
| Cdc40    | 21.03 | 18.65 | -0.17 | 7.97E-01 | no |
| Scg5     | 0.18  | 0.06  | -1.59 | 7.97E-01 | no |
| Pigyl    | 18.06 | 15.23 | -0.25 | 7.97E-01 | no |
| Tada1    | 21.94 | 19.51 | -0.17 | 7.97E-01 | no |
| Rnf111   | 19.05 | 21.07 | 0.15  | 7.97E-01 | no |
| Bicd1    | 0.61  | 0.78  | 0.35  | 7.97E-01 | no |
| Triap1   | 22.11 | 19.08 | -0.21 | 7.97E-01 | no |
| Psmg4    | 25.53 | 29.73 | 0.22  | 7.97E-01 | no |
| Psemb6   | 42.01 | 37.33 | -0.17 | 7.97E-01 | no |
| Psma8    | 0.35  | 0.51  | 0.52  | 7.97E-01 | no |
| Trap1    | 40.04 | 36.24 | -0.14 | 7.97E-01 | no |
| Cdc37l1  | 24.29 | 21.70 | -0.16 | 7.97E-01 | no |
| Grb10    | 1.21  | 1.48  | 0.29  | 7.98E-01 | no |
| Saa3     | 0.15  | 0.39  | 1.42  | 7.98E-01 | no |
| AA881470 | 10.34 | 11.59 | 0.16  | 7.98E-01 | no |
| Timm8b   | 24.72 | 20.88 | -0.24 | 7.98E-01 | no |
| Smad1    | 5.92  | 6.88  | 0.22  | 7.98E-01 | no |
| Gpn2     | 14.15 | 12.19 | -0.22 | 7.98E-01 | no |
| Dscaml1  | 0.02  | 0.04  | 0.91  | 7.99E-01 | no |
| Pofut2   | 8.75  | 10.08 | 0.20  | 7.99E-01 | no |
| Mmd      | 10.58 | 9.16  | -0.21 | 7.99E-01 | no |
| Coq10b   | 5.65  | 4.68  | -0.27 | 7.99E-01 | no |
| Zbtb39   | 5.43  | 4.76  | -0.19 | 7.99E-01 | no |
| BC048644 | 0.10  | 0.05  | -1.08 | 7.99E-01 | no |
| Tm9sf1   | 25.81 | 23.18 | -0.15 | 7.99E-01 | no |
| Trpm7    | 26.51 | 28.74 | 0.12  | 8.00E-01 | no |
| Cntrob   | 19.88 | 17.97 | -0.15 | 8.00E-01 | no |
| Vmn2r18  | 0.10  | 0.03  | -1.59 | 8.00E-01 | no |
| Bcas2    | 29.71 | 26.28 | -0.18 | 8.00E-01 | no |
| Car7     | 0.20  | 0.31  | 0.65  | 8.00E-01 | no |
| Snhg10   | 1.71  | 2.31  | 0.43  | 8.00E-01 | no |
| Zfp346   | 14.20 | 12.67 | -0.16 | 8.00E-01 | no |

|              |       |       |       |          |    |
|--------------|-------|-------|-------|----------|----|
| Stk11        | 50.71 | 45.88 | -0.14 | 8.00E-01 | no |
| Rilp         | 0.44  | 0.31  | -0.51 | 8.00E-01 | no |
| Med29        | 5.75  | 4.86  | -0.24 | 8.00E-01 | no |
| Slfn10-ps    | 6.98  | 8.01  | 0.20  | 8.00E-01 | no |
| Usp48        | 23.34 | 21.22 | -0.14 | 8.00E-01 | no |
| Nosip        | 22.70 | 20.35 | -0.16 | 8.00E-01 | no |
| Plaur        | 0.54  | 0.73  | 0.45  | 8.00E-01 | no |
| 2300009A05Ri | 8.48  | 6.88  | -0.30 | 8.00E-01 | no |
| Slc5a11      | 0.18  | 0.27  | 0.61  | 8.00E-01 | no |
| Aco1         | 5.92  | 6.77  | 0.19  | 8.01E-01 | no |
| Gstp1        | 52.70 | 46.61 | -0.18 | 8.01E-01 | no |
| Erc5         | 5.98  | 6.85  | 0.19  | 8.01E-01 | no |
| Ip6k1        | 40.72 | 44.75 | 0.14  | 8.01E-01 | no |
| Gramd3       | 7.90  | 6.80  | -0.22 | 8.01E-01 | no |
| 2310016C08Ri | 12.41 | 14.62 | 0.24  | 8.01E-01 | no |
| B4galt3      | 11.96 | 13.67 | 0.19  | 8.01E-01 | no |
| Gm13363      | 1.90  | 2.34  | 0.30  | 8.01E-01 | no |
| Slc29a1      | 69.21 | 74.34 | 0.10  | 8.01E-01 | no |
| Smpdl3b      | 0.11  | 0.19  | 0.82  | 8.02E-01 | no |
| B9d1         | 4.15  | 5.16  | 0.31  | 8.02E-01 | no |
| Fuk          | 3.90  | 4.52  | 0.21  | 8.02E-01 | no |
| Prkaca       | 25.55 | 22.94 | -0.16 | 8.02E-01 | no |
| Pdha1        | 49.87 | 45.33 | -0.14 | 8.02E-01 | no |
| Ece1         | 7.66  | 6.79  | -0.18 | 8.02E-01 | no |
| Gtpbp10      | 8.40  | 7.25  | -0.21 | 8.02E-01 | no |
| Gm7134       | 0.25  | 0.17  | -0.59 | 8.02E-01 | no |
| Cog6         | 16.09 | 14.32 | -0.17 | 8.02E-01 | no |
| Tle1         | 2.54  | 2.13  | -0.25 | 8.02E-01 | no |
| Ndufs7       | 37.44 | 32.79 | -0.19 | 8.03E-01 | no |
| 4930579K19Ri | 0.48  | 0.69  | 0.53  | 8.03E-01 | no |
| Hjurp        | 56.10 | 61.90 | 0.14  | 8.03E-01 | no |
| Hint1        | 76.24 | 67.87 | -0.17 | 8.03E-01 | no |
| Lipt2        | 3.56  | 2.87  | -0.31 | 8.03E-01 | no |
| 1700067K01Ri | 1.61  | 1.23  | -0.39 | 8.03E-01 | no |
| Trim13       | 3.60  | 4.77  | 0.41  | 8.03E-01 | no |
| Alg12        | 7.58  | 8.78  | 0.21  | 8.03E-01 | no |
| Nudt3        | 44.85 | 40.65 | -0.14 | 8.03E-01 | no |
| Frmd4b       | 1.91  | 1.58  | -0.27 | 8.03E-01 | no |
| Crb2         | 0.12  | 0.09  | -0.51 | 8.03E-01 | no |
| Rasgrp2      | 57.31 | 63.12 | 0.14  | 8.03E-01 | no |
| Sdccag8      | 7.14  | 8.22  | 0.20  | 8.03E-01 | no |
| Raver2       | 0.08  | 0.04  | -1.02 | 8.03E-01 | no |



|              |       |       |       |          |    |
|--------------|-------|-------|-------|----------|----|
| Mvd          | 3.59  | 4.33  | 0.27  | 8.03E-01 | no |
| Ptpn21       | 1.41  | 1.68  | 0.26  | 8.03E-01 | no |
| Plekha2      | 79.68 | 72.52 | -0.14 | 8.03E-01 | no |
| 6720489N17Ri | 3.62  | 3.00  | -0.27 | 8.03E-01 | no |
| Rpl23a       | 2.29  | 1.72  | -0.41 | 8.03E-01 | no |
| Fryl         | 34.41 | 31.30 | -0.14 | 8.03E-01 | no |
| Thoc7        | 45.19 | 40.22 | -0.17 | 8.04E-01 | no |
| Tada2a       | 8.35  | 7.16  | -0.22 | 8.04E-01 | no |
| Ubash3b      | 2.77  | 3.31  | 0.26  | 8.04E-01 | no |
| Fam53c       | 18.77 | 16.98 | -0.14 | 8.04E-01 | no |
| Rhog         | 51.49 | 46.33 | -0.15 | 8.04E-01 | no |
| Gls          | 31.31 | 34.05 | 0.12  | 8.04E-01 | no |
| Oxsm         | 6.87  | 5.96  | -0.21 | 8.04E-01 | no |
| Eno2         | 0.06  | 0.12  | 0.94  | 8.04E-01 | no |
| Srgap1       | 0.23  | 0.31  | 0.44  | 8.04E-01 | no |
| Acvr2a       | 3.59  | 4.17  | 0.22  | 8.04E-01 | no |
| 3110003A17Ri | 47.04 | 53.19 | 0.18  | 8.04E-01 | no |
| Pdpr         | 13.93 | 12.36 | -0.17 | 8.04E-01 | no |
| Mfsd2b       | 0.45  | 0.34  | -0.41 | 8.04E-01 | no |
| 6430598A04Ri | 0.43  | 0.56  | 0.37  | 8.05E-01 | no |
| Zfp410       | 21.63 | 19.35 | -0.16 | 8.05E-01 | no |
| Anxa2        | 2.26  | 1.80  | -0.33 | 8.05E-01 | no |
| 2310045N01Ri | 15.87 | 18.76 | 0.24  | 8.05E-01 | no |
| Khdrbs1      | 96.47 | 87.99 | -0.13 | 8.05E-01 | no |
| Psm4         | 40.81 | 36.60 | -0.16 | 8.06E-01 | no |
| Adcy9        | 0.59  | 0.74  | 0.33  | 8.06E-01 | no |
| Klf6         | 12.34 | 13.81 | 0.16  | 8.06E-01 | no |
| Braf         | 9.46  | 10.44 | 0.14  | 8.06E-01 | no |
| Usp15        | 29.41 | 32.43 | 0.14  | 8.06E-01 | no |
| Prpf38b      | 52.13 | 47.51 | -0.13 | 8.06E-01 | no |
| Parl         | 21.98 | 19.25 | -0.19 | 8.06E-01 | no |
| Ttc25        | 0.11  | 0.06  | -0.85 | 8.06E-01 | no |
| Ctu2         | 10.05 | 8.86  | -0.18 | 8.06E-01 | no |
| Stat4        | 8.46  | 9.69  | 0.20  | 8.06E-01 | no |
| Tbcb         | 15.79 | 18.15 | 0.20  | 8.06E-01 | no |
| Son          | 88.07 | 81.54 | -0.11 | 8.06E-01 | no |
| Pqbp1        | 40.46 | 36.17 | -0.16 | 8.06E-01 | no |
| Pla2g6       | 3.33  | 3.87  | 0.22  | 8.06E-01 | no |
| Dnpep        | 16.38 | 18.50 | 0.18  | 8.07E-01 | no |
| Isg20        | 4.67  | 5.69  | 0.28  | 8.07E-01 | no |
| Cds2         | 31.79 | 34.91 | 0.13  | 8.07E-01 | no |
| Alg2         | 13.99 | 15.70 | 0.17  | 8.07E-01 | no |

|               |       |       |       |          |    |
|---------------|-------|-------|-------|----------|----|
| C85492        | 1.48  | 1.17  | -0.34 | 8.07E-01 | no |
| Prr7          | 0.75  | 0.98  | 0.40  | 8.08E-01 | no |
| Prkce         | 9.90  | 10.99 | 0.15  | 8.08E-01 | no |
| Psmg1         | 18.17 | 15.63 | -0.22 | 8.08E-01 | no |
| BC048507      | 9.28  | 7.59  | -0.29 | 8.08E-01 | no |
| Matn4         | 0.07  | 0.02  | -2.13 | 8.08E-01 | no |
| P4ha1         | 4.31  | 5.01  | 0.22  | 8.08E-01 | no |
| Adck4         | 6.26  | 7.30  | 0.22  | 8.08E-01 | no |
| Ap3m1         | 20.91 | 18.92 | -0.14 | 8.08E-01 | no |
| Slc25a34      | 0.03  | 0.08  | 1.50  | 8.08E-01 | no |
| E530011L22Ril | 0.09  | 0.15  | 0.68  | 8.08E-01 | no |
| Cxadr         | 0.24  | 0.36  | 0.59  | 8.08E-01 | no |
| Pdcd2         | 17.68 | 20.35 | 0.20  | 8.08E-01 | no |
| Cnpy2         | 19.28 | 22.10 | 0.20  | 8.08E-01 | no |
| Lig3          | 14.17 | 15.64 | 0.14  | 8.08E-01 | no |
| Ttpal         | 31.55 | 28.96 | -0.12 | 8.08E-01 | no |
| Pcnt          | 19.99 | 18.25 | -0.13 | 8.08E-01 | no |
| Rprd2         | 16.77 | 15.26 | -0.14 | 8.08E-01 | no |
| Slc6a6        | 14.71 | 13.32 | -0.14 | 8.08E-01 | no |
| Tmem39a       | 13.97 | 12.18 | -0.20 | 8.08E-01 | no |
| Gm5887        | 0.59  | 0.41  | -0.52 | 8.08E-01 | no |
| 0910001L09Ril | 15.99 | 18.61 | 0.22  | 8.08E-01 | no |
| Rgs16         | 0.68  | 0.88  | 0.37  | 8.08E-01 | no |
| Zfyve19       | 10.88 | 12.43 | 0.19  | 8.08E-01 | no |
| Ralgapa2      | 4.08  | 4.59  | 0.17  | 8.08E-01 | no |
| Bhlhb9        | 18.12 | 20.11 | 0.15  | 8.08E-01 | no |
| Sub1          | 18.08 | 16.18 | -0.16 | 8.08E-01 | no |
| Snx20         | 20.48 | 18.03 | -0.18 | 8.08E-01 | no |
| Aasdh         | 7.66  | 8.70  | 0.18  | 8.09E-01 | no |
| Cog7          | 9.10  | 7.97  | -0.19 | 8.09E-01 | no |
| Mpv17l        | 0.29  | 0.40  | 0.44  | 8.09E-01 | no |
| Degs2         | 6.88  | 8.07  | 0.23  | 8.09E-01 | no |
| Tmem85        | 19.04 | 16.38 | -0.22 | 8.09E-01 | no |
| Cxcl12        | 0.05  | 0.13  | 1.21  | 8.09E-01 | no |
| Hgsnat        | 3.95  | 4.67  | 0.24  | 8.09E-01 | no |
| Tpra1         | 11.24 | 12.90 | 0.20  | 8.09E-01 | no |
| Kif21b        | 28.32 | 31.06 | 0.13  | 8.09E-01 | no |
| Itpripl2      | 1.94  | 1.64  | -0.24 | 8.09E-01 | no |
| Nom1          | 14.65 | 13.14 | -0.16 | 8.09E-01 | no |
| Hsf5          | 0.02  | 0.06  | 1.53  | 8.09E-01 | no |
| Muc1          | 0.09  | 0.16  | 0.82  | 8.09E-01 | no |
| Gpr113        | 0.03  | 0.07  | 1.33  | 8.10E-01 | no |

|          |       |       |       |          |    |
|----------|-------|-------|-------|----------|----|
| Tmem203  | 9.06  | 10.80 | 0.25  | 8.10E-01 | no |
| Sspo     | 0.01  | 0.00  | -1.53 | 8.10E-01 | no |
| Cluap1   | 12.09 | 13.86 | 0.20  | 8.10E-01 | no |
| Hist1h4b | 1.44  | 0.89  | -0.70 | 8.10E-01 | no |
| Tas1r3   | 0.45  | 0.58  | 0.36  | 8.10E-01 | no |
| E2f4     | 44.64 | 40.59 | -0.14 | 8.10E-01 | no |
| Ppp3r1   | 39.73 | 36.09 | -0.14 | 8.10E-01 | no |
| Lancl2   | 18.08 | 16.26 | -0.15 | 8.10E-01 | no |
| Nanp     | 18.75 | 16.35 | -0.20 | 8.10E-01 | no |
| Tbxas1   | 0.06  | 0.13  | 1.04  | 8.11E-01 | no |
| Gm5901   | 1.82  | 2.32  | 0.35  | 8.11E-01 | no |
| Star     | 1.86  | 2.23  | 0.26  | 8.11E-01 | no |
| Pwp1     | 18.04 | 16.10 | -0.16 | 8.11E-01 | no |
| Ints4    | 18.14 | 16.31 | -0.15 | 8.11E-01 | no |
| Med6     | 14.42 | 12.29 | -0.23 | 8.11E-01 | no |
| Zfp423   | 0.02  | 0.05  | 1.12  | 8.11E-01 | no |
| Adrbk2   | 0.94  | 1.14  | 0.29  | 8.11E-01 | no |
| Zcchc6   | 20.13 | 22.11 | 0.14  | 8.11E-01 | no |
| Lbp      | 0.28  | 0.20  | -0.52 | 8.12E-01 | no |
| Zfp759   | 2.29  | 2.75  | 0.26  | 8.12E-01 | no |
| Tceb2    | 48.80 | 42.69 | -0.19 | 8.12E-01 | no |
| Ms4a6d   | 0.36  | 0.23  | -0.68 | 8.12E-01 | no |
| Gabbr2   | 0.09  | 0.17  | 0.90  | 8.12E-01 | no |
| Sh3gl3   | 0.28  | 0.41  | 0.55  | 8.12E-01 | no |
| Pglyrp1  | 0.95  | 1.33  | 0.49  | 8.12E-01 | no |
| Trappc6a | 12.49 | 14.70 | 0.24  | 8.12E-01 | no |
| Caml     | 11.66 | 13.51 | 0.21  | 8.12E-01 | no |
| Tsga14   | 7.95  | 9.04  | 0.19  | 8.12E-01 | no |
| Pan3     | 33.26 | 36.49 | 0.13  | 8.12E-01 | no |
| Uggt1    | 18.29 | 20.04 | 0.13  | 8.12E-01 | no |
| Ikbkap   | 13.05 | 11.82 | -0.14 | 8.12E-01 | no |
| Emg1     | 64.93 | 58.71 | -0.15 | 8.12E-01 | no |
| Tbl1x    | 29.06 | 26.24 | -0.15 | 8.12E-01 | no |
| Fam126a  | 11.68 | 10.52 | -0.15 | 8.12E-01 | no |
| Slc31a1  | 12.14 | 10.81 | -0.17 | 8.12E-01 | no |
| Alg13    | 7.79  | 6.84  | -0.19 | 8.12E-01 | no |
| Mrpl20   | 35.03 | 30.55 | -0.20 | 8.12E-01 | no |
| Mad2l2   | 11.30 | 9.65  | -0.23 | 8.12E-01 | no |
| Dnajc17  | 5.84  | 4.84  | -0.27 | 8.12E-01 | no |
| Cask     | 0.45  | 0.36  | -0.33 | 8.12E-01 | no |
| Abra     | 0.10  | 0.04  | -1.22 | 8.12E-01 | no |
| Gm648    | 0.17  | 0.07  | -1.22 | 8.12E-01 | no |

|               |        |        |       |          |    |
|---------------|--------|--------|-------|----------|----|
| Cdk3-ps       | 0.77   | 1.01   | 0.39  | 8.12E-01 | no |
| Rsb1l1        | 21.63  | 23.80  | 0.14  | 8.12E-01 | no |
| Aes           | 44.12  | 48.74  | 0.14  | 8.13E-01 | no |
| Pink1         | 27.31  | 30.17  | 0.14  | 8.13E-01 | no |
| Ryr3          | 0.01   | 0.01   | 1.48  | 8.13E-01 | no |
| Ncor1         | 38.98  | 35.60  | -0.13 | 8.13E-01 | no |
| A230056P14Ri  | 1.61   | 2.04   | 0.34  | 8.14E-01 | no |
| Acad9         | 9.78   | 8.68   | -0.17 | 8.14E-01 | no |
| Rec8          | 0.04   | 0.09   | 1.35  | 8.14E-01 | no |
| Dazl          | 0.06   | 0.11   | 0.92  | 8.14E-01 | no |
| C2            | 0.08   | 0.13   | 0.80  | 8.14E-01 | no |
| Adamts17      | 0.08   | 0.12   | 0.51  | 8.14E-01 | no |
| Ttc8          | 0.88   | 1.15   | 0.38  | 8.14E-01 | no |
| 1810074P20Ri  | 8.83   | 9.93   | 0.17  | 8.14E-01 | no |
| Trim8         | 19.54  | 21.57  | 0.14  | 8.14E-01 | no |
| Ddx54         | 38.60  | 35.28  | -0.13 | 8.14E-01 | no |
| Dom3z         | 17.92  | 15.85  | -0.18 | 8.14E-01 | no |
| 9030409G11Ri  | 0.16   | 0.10   | -0.65 | 8.14E-01 | no |
| Epb4.1l4a     | 0.06   | 0.03   | -1.12 | 8.14E-01 | no |
| Alox15        | 0.08   | 0.03   | -1.52 | 8.14E-01 | no |
| Cyb5rl        | 3.88   | 4.67   | 0.27  | 8.14E-01 | no |
| 1110012L19Ril | 7.64   | 9.07   | 0.25  | 8.14E-01 | no |
| Rbm3          | 260.47 | 282.05 | 0.11  | 8.14E-01 | no |
| Fxc1          | 20.59  | 17.80  | -0.21 | 8.14E-01 | no |
| Gpr61         | 0.06   | 0.02   | -1.51 | 8.14E-01 | no |
| Dnajc10       | 20.66  | 18.72  | -0.14 | 8.14E-01 | no |
| Epgn          | 0.04   | 0.11   | 1.41  | 8.14E-01 | no |
| Spag8         | 0.10   | 0.19   | 1.02  | 8.14E-01 | no |
| Mrps26        | 33.70  | 29.95  | -0.17 | 8.14E-01 | no |
| Pcbp4         | 3.40   | 2.83   | -0.27 | 8.14E-01 | no |
| Cd68          | 4.89   | 3.99   | -0.29 | 8.14E-01 | no |
| Gspt2         | 0.24   | 0.16   | -0.56 | 8.14E-01 | no |
| Aqp3          | 0.12   | 0.04   | -1.51 | 8.14E-01 | no |
| BC048943      | 1.50   | 1.13   | -0.41 | 8.14E-01 | no |
| Wwp2          | 23.21  | 25.47  | 0.13  | 8.15E-01 | no |
| Pde3b         | 22.46  | 20.46  | -0.13 | 8.15E-01 | no |
| Mmp11         | 13.07  | 11.52  | -0.18 | 8.15E-01 | no |
| Tnfrsf13b     | 0.16   | 0.08   | -0.98 | 8.15E-01 | no |
| Pus3          | 15.87  | 13.98  | -0.18 | 8.15E-01 | no |
| Tlr11         | 0.03   | 0.08   | 1.50  | 8.15E-01 | no |
| Ap3b2         | 0.05   | 0.09   | 0.78  | 8.15E-01 | no |
| Tlr13         | 0.30   | 0.40   | 0.39  | 8.15E-01 | no |

|              |       |       |       |          |    |
|--------------|-------|-------|-------|----------|----|
| Spsb2        | 3.82  | 4.61  | 0.27  | 8.15E-01 | no |
| 4833420G17Ri | 33.87 | 30.76 | -0.14 | 8.15E-01 | no |
| Aoc3         | 0.18  | 0.13  | -0.48 | 8.15E-01 | no |
| Slc22a4      | 0.10  | 0.05  | -1.08 | 8.15E-01 | no |
| Ibtk         | 19.94 | 18.15 | -0.14 | 8.16E-01 | no |
| Zfp748       | 8.67  | 7.69  | -0.17 | 8.16E-01 | no |
| Rnd1         | 0.12  | 0.06  | -0.99 | 8.16E-01 | no |
| Sphk1        | 0.22  | 0.11  | -1.00 | 8.16E-01 | no |
| Rabep2       | 14.91 | 16.61 | 0.16  | 8.16E-01 | no |
| B230120H23Ri | 9.79  | 8.90  | -0.14 | 8.16E-01 | no |
| Hax1         | 31.01 | 27.54 | -0.17 | 8.16E-01 | no |
| Cwc15        | 38.36 | 34.35 | -0.16 | 8.16E-01 | no |
| G530011O06R  | 0.07  | 0.02  | -2.09 | 8.16E-01 | no |
| Oas1e        | 0.23  | 0.35  | 0.57  | 8.16E-01 | no |
| 2610301G19Ri | 32.84 | 29.99 | -0.13 | 8.16E-01 | no |
| Clcc1        | 18.13 | 16.29 | -0.15 | 8.16E-01 | no |
| D19Bwg1357e  | 17.55 | 15.84 | -0.15 | 8.16E-01 | no |
| 2610305D13Ri | 0.05  | 0.13  | 1.30  | 8.16E-01 | no |
| Fam184b      | 0.04  | 0.06  | 0.86  | 8.16E-01 | no |
| Samd10       | 5.73  | 6.70  | 0.23  | 8.16E-01 | no |
| Zfp498       | 8.94  | 10.24 | 0.19  | 8.16E-01 | no |
| Apoa1bp      | 26.78 | 30.45 | 0.19  | 8.16E-01 | no |
| Runx3        | 9.78  | 10.93 | 0.16  | 8.16E-01 | no |
| Zswim4       | 9.41  | 10.49 | 0.16  | 8.16E-01 | no |
| Elavl3       | 0.03  | 0.01  | -1.21 | 8.16E-01 | no |
| Stk4         | 78.20 | 71.47 | -0.13 | 8.16E-01 | no |
| Gm6904       | 0.49  | 0.74  | 0.58  | 8.17E-01 | no |
| Mll2         | 32.64 | 36.06 | 0.14  | 8.17E-01 | no |
| Def6         | 23.37 | 25.81 | 0.14  | 8.17E-01 | no |
| Tm9sf4       | 15.46 | 13.93 | -0.15 | 8.17E-01 | no |
| Rdh11        | 15.72 | 13.75 | -0.19 | 8.17E-01 | no |
| Mrpl53       | 23.15 | 19.86 | -0.22 | 8.17E-01 | no |
| Psmb8        | 54.22 | 59.75 | 0.14  | 8.17E-01 | no |
| Trim14       | 13.21 | 15.13 | 0.20  | 8.17E-01 | no |
| Rnf19a       | 10.50 | 9.37  | -0.16 | 8.17E-01 | no |
| 1810009A15Ri | 26.32 | 22.79 | -0.21 | 8.17E-01 | no |
| Ctsh         | 1.98  | 2.46  | 0.31  | 8.17E-01 | no |
| Mcoln2       | 9.32  | 10.58 | 0.18  | 8.17E-01 | no |
| Arid5a       | 19.80 | 18.32 | -0.11 | 8.17E-01 | no |
| Scyl3        | 18.18 | 16.47 | -0.14 | 8.17E-01 | no |
| Pop4         | 19.32 | 16.93 | -0.19 | 8.17E-01 | no |
| Nfil3        | 0.66  | 0.50  | -0.39 | 8.17E-01 | no |

|              |       |       |       |          |    |
|--------------|-------|-------|-------|----------|----|
| Rspo4        | 0.11  | 0.06  | -0.88 | 8.17E-01 | no |
| 1700012A16Ri | 1.80  | 2.21  | 0.29  | 8.17E-01 | no |
| 2310043J07Ri | 0.41  | 0.59  | 0.53  | 8.17E-01 | no |
| Ccdc91       | 5.16  | 6.01  | 0.22  | 8.17E-01 | no |
| Ccdc142      | 7.00  | 7.96  | 0.19  | 8.17E-01 | no |
| R3hcc1       | 12.92 | 14.67 | 0.18  | 8.17E-01 | no |
| Mras         | 0.07  | 0.03  | -1.00 | 8.17E-01 | no |
| Adamts4      | 0.05  | 0.02  | -1.20 | 8.17E-01 | no |
| Terf2ip      | 7.40  | 8.38  | 0.18  | 8.18E-01 | no |
| Impad1       | 19.86 | 18.01 | -0.14 | 8.18E-01 | no |
| 9330176C04Ri | 0.28  | 0.17  | -0.71 | 8.18E-01 | no |
| Cdh11        | 0.49  | 0.38  | -0.36 | 8.18E-01 | no |
| Lbx2         | 0.09  | 0.25  | 1.48  | 8.18E-01 | no |
| Itk          | 0.14  | 0.19  | 0.48  | 8.18E-01 | no |
| Dennd4b      | 21.34 | 23.38 | 0.13  | 8.18E-01 | no |
| Prkcb        | 61.95 | 56.48 | -0.13 | 8.18E-01 | no |
| Ogfod1       | 8.91  | 8.00  | -0.15 | 8.18E-01 | no |
| Pigl         | 7.93  | 6.78  | -0.23 | 8.18E-01 | no |
| Rhebl1       | 5.98  | 4.98  | -0.26 | 8.18E-01 | no |
| Spata2L      | 2.82  | 3.37  | 0.26  | 8.18E-01 | no |
| Lpar2        | 8.53  | 9.50  | 0.16  | 8.18E-01 | no |
| Dhx38        | 22.66 | 20.67 | -0.13 | 8.18E-01 | no |
| Xiap         | 32.03 | 29.30 | -0.13 | 8.18E-01 | no |
| Cops6        | 39.60 | 35.45 | -0.16 | 8.18E-01 | no |
| Ptplad2      | 0.31  | 0.44  | 0.50  | 8.18E-01 | no |
| Neurod4      | 0.11  | 0.06  | -0.99 | 8.18E-01 | no |
| Wbp4         | 12.90 | 11.52 | -0.16 | 8.18E-01 | no |
| Sipa1l3      | 8.00  | 8.81  | 0.14  | 8.18E-01 | no |
| Ppp1r11      | 13.11 | 11.43 | -0.20 | 8.18E-01 | no |
| LOC10027222: | 0.23  | 0.12  | -0.96 | 8.18E-01 | no |
| Ndufs8       | 39.37 | 35.13 | -0.16 | 8.18E-01 | no |
| Piwil2       | 0.09  | 0.13  | 0.55  | 8.18E-01 | no |
| Zfp11        | 2.16  | 2.56  | 0.25  | 8.18E-01 | no |
| Ankzf1       | 11.36 | 12.76 | 0.17  | 8.18E-01 | no |
| Preb         | 17.12 | 15.60 | -0.13 | 8.18E-01 | no |
| Wdr3         | 19.85 | 17.99 | -0.14 | 8.18E-01 | no |
| Pira1        | 0.27  | 0.12  | -1.12 | 8.18E-01 | no |
| Gal3st3      | 0.04  | 0.09  | 1.32  | 8.19E-01 | no |
| Sned1        | 0.13  | 0.18  | 0.49  | 8.19E-01 | no |
| Cbara1       | 18.38 | 20.44 | 0.15  | 8.19E-01 | no |
| Hspbp1       | 26.05 | 23.29 | -0.16 | 8.19E-01 | no |
| Ramp3        | 0.14  | 0.06  | -1.19 | 8.19E-01 | no |

|          |       |       |       |          |    |
|----------|-------|-------|-------|----------|----|
| Ech1     | 24.80 | 27.95 | 0.17  | 8.19E-01 | no |
| Pex16    | 9.57  | 11.03 | 0.20  | 8.19E-01 | no |
| Ap4b1    | 11.15 | 12.49 | 0.16  | 8.19E-01 | no |
| Zfp866   | 15.37 | 13.98 | -0.14 | 8.19E-01 | no |
| Sesn3    | 14.63 | 12.94 | -0.18 | 8.19E-01 | no |
| Gm10731  | 0.09  | 0.03  | -1.48 | 8.19E-01 | no |
| Akt1s1   | 14.01 | 15.91 | 0.18  | 8.19E-01 | no |
| Kank3    | 1.45  | 1.19  | -0.29 | 8.20E-01 | no |
| Aktip    | 7.36  | 8.53  | 0.21  | 8.20E-01 | no |
| Vipar    | 14.26 | 15.87 | 0.15  | 8.20E-01 | no |
| Ccdc135  | 16.39 | 18.23 | 0.15  | 8.20E-01 | no |
| Zfp362   | 21.29 | 23.46 | 0.14  | 8.20E-01 | no |
| Xpc      | 10.92 | 9.78  | -0.16 | 8.20E-01 | no |
| Unkl     | 13.61 | 14.95 | 0.14  | 8.20E-01 | no |
| Sephs2   | 35.89 | 32.59 | -0.14 | 8.20E-01 | no |
| Bsdc1    | 12.19 | 13.65 | 0.16  | 8.20E-01 | no |
| Rlf      | 12.92 | 11.74 | -0.14 | 8.20E-01 | no |
| Vegfc    | 0.79  | 0.61  | -0.39 | 8.20E-01 | no |
| Zmynd15  | 0.04  | 0.01  | -2.04 | 8.20E-01 | no |
| Sgcb     | 5.14  | 5.92  | 0.20  | 8.20E-01 | no |
| Cir1     | 16.35 | 18.37 | 0.17  | 8.20E-01 | no |
| Jmjd4    | 8.49  | 9.53  | 0.17  | 8.20E-01 | no |
| Dck      | 87.58 | 95.65 | 0.13  | 8.20E-01 | no |
| Angpt2   | 0.27  | 0.19  | -0.50 | 8.21E-01 | no |
| Lrrc24   | 0.75  | 0.96  | 0.35  | 8.21E-01 | no |
| Slc22a21 | 1.39  | 1.72  | 0.31  | 8.21E-01 | no |
| Gdf11    | 1.93  | 2.35  | 0.28  | 8.21E-01 | no |
| Naalad2  | 0.07  | 0.03  | -1.25 | 8.21E-01 | no |
| Amz1     | 0.31  | 0.42  | 0.42  | 8.21E-01 | no |
| Car13    | 14.48 | 16.32 | 0.17  | 8.21E-01 | no |
| Pld6     | 0.53  | 0.39  | -0.44 | 8.21E-01 | no |
| Xrcc5    | 12.77 | 11.31 | -0.18 | 8.21E-01 | no |
| Gp9      | 0.41  | 0.24  | -0.77 | 8.21E-01 | no |
| Gm1604b  | 0.66  | 0.92  | 0.48  | 8.21E-01 | no |
| Nudt7    | 5.23  | 6.30  | 0.27  | 8.21E-01 | no |
| Fibp     | 19.28 | 21.97 | 0.19  | 8.21E-01 | no |
| Lpl      | 0.35  | 0.27  | -0.39 | 8.21E-01 | no |
| Arfgef1  | 24.60 | 26.86 | 0.13  | 8.22E-01 | no |
| Tenc1    | 0.03  | 0.06  | 0.89  | 8.22E-01 | no |
| Trim33   | 15.38 | 14.24 | -0.11 | 8.22E-01 | no |
| Lama5    | 0.03  | 0.01  | -0.82 | 8.22E-01 | no |
| Hebp2    | 0.13  | 0.21  | 0.75  | 8.22E-01 | no |

|              |       |       |       |          |    |
|--------------|-------|-------|-------|----------|----|
| Rbm7         | 30.07 | 27.01 | -0.15 | 8.22E-01 | no |
| Cd300lb      | 0.24  | 0.33  | 0.44  | 8.22E-01 | no |
| Kif7         | 0.31  | 0.39  | 0.34  | 8.22E-01 | no |
| Phf20l1      | 21.60 | 19.76 | -0.13 | 8.22E-01 | no |
| Slu7         | 17.34 | 15.83 | -0.13 | 8.22E-01 | no |
| Slc35a3      | 19.80 | 17.94 | -0.14 | 8.22E-01 | no |
| Ggps1        | 14.44 | 12.78 | -0.18 | 8.22E-01 | no |
| Eef1e1       | 18.49 | 16.03 | -0.21 | 8.22E-01 | no |
| Lsmd1        | 33.14 | 28.72 | -0.21 | 8.22E-01 | no |
| Fbxo47       | 0.86  | 0.66  | -0.39 | 8.22E-01 | no |
| Cdo1         | 0.69  | 0.51  | -0.42 | 8.22E-01 | no |
| Tpr          | 41.35 | 37.90 | -0.13 | 8.23E-01 | no |
| Tceal8       | 3.11  | 3.73  | 0.26  | 8.23E-01 | no |
| Zfp59        | 2.81  | 3.30  | 0.23  | 8.23E-01 | no |
| Slc25a28     | 20.99 | 18.67 | -0.17 | 8.23E-01 | no |
| Pmvk         | 12.02 | 10.45 | -0.20 | 8.23E-01 | no |
| E330034G19Ri | 0.05  | 0.13  | 1.45  | 8.23E-01 | no |
| Cldn7        | 0.08  | 0.22  | 1.45  | 8.23E-01 | no |
| Tdo2         | 0.05  | 0.14  | 1.45  | 8.23E-01 | no |
| Akr1b7       | 0.18  | 0.29  | 0.71  | 8.23E-01 | no |
| Prickle1     | 0.12  | 0.17  | 0.49  | 8.23E-01 | no |
| Fez2         | 4.71  | 5.54  | 0.23  | 8.23E-01 | no |
| Nt5c3        | 12.50 | 14.29 | 0.19  | 8.23E-01 | no |
| Pfdn5        | 62.47 | 69.30 | 0.15  | 8.23E-01 | no |
| Lemd3        | 11.05 | 12.23 | 0.15  | 8.23E-01 | no |
| Eif2c1       | 24.01 | 26.20 | 0.13  | 8.23E-01 | no |
| Csnk2a1      | 56.13 | 51.48 | -0.12 | 8.23E-01 | no |
| Ube2v1       | 60.77 | 55.58 | -0.13 | 8.23E-01 | no |
| Wdr43        | 30.51 | 27.87 | -0.13 | 8.23E-01 | no |
| Bahd1        | 17.44 | 15.88 | -0.14 | 8.23E-01 | no |
| Ing5         | 14.82 | 13.43 | -0.14 | 8.23E-01 | no |
| Zc3h10       | 14.66 | 13.03 | -0.17 | 8.23E-01 | no |
| Fbxo33       | 8.27  | 7.27  | -0.19 | 8.23E-01 | no |
| Agpat2       | 3.91  | 3.16  | -0.31 | 8.23E-01 | no |
| Lmo1         | 0.66  | 0.46  | -0.50 | 8.23E-01 | no |
| Dzip3        | 12.09 | 13.23 | 0.13  | 8.23E-01 | no |
| Hectd1       | 28.53 | 31.11 | 0.13  | 8.23E-01 | no |
| Psmc5        | 41.49 | 37.49 | -0.15 | 8.23E-01 | no |
| Med4         | 22.59 | 20.01 | -0.17 | 8.23E-01 | no |
| Tmco6        | 12.95 | 11.37 | -0.19 | 8.23E-01 | no |
| Gzma         | 0.70  | 0.48  | -0.54 | 8.23E-01 | no |
| Gm14378      | 3.33  | 4.07  | 0.29  | 8.23E-01 | no |



|              |        |        |       |          |    |
|--------------|--------|--------|-------|----------|----|
| Vdac2        | 50.38  | 45.86  | -0.14 | 8.23E-01 | no |
| Hcfc2        | 11.03  | 9.71   | -0.18 | 8.23E-01 | no |
| N28178       | 0.07   | 0.11   | 0.74  | 8.23E-01 | no |
| Eif2b2       | 26.06  | 28.94  | 0.15  | 8.23E-01 | no |
| C1d          | 13.07  | 11.57  | -0.18 | 8.23E-01 | no |
| Cryzl1       | 11.35  | 9.78   | -0.22 | 8.24E-01 | no |
| Dalrd3       | 25.14  | 27.90  | 0.15  | 8.24E-01 | no |
| Maoa         | 1.84   | 1.54   | -0.26 | 8.24E-01 | no |
| Crb3         | 0.06   | 0.17   | 1.45  | 8.24E-01 | no |
| Thap11       | 21.38  | 19.16  | -0.16 | 8.24E-01 | no |
| St13         | 57.54  | 52.57  | -0.13 | 8.24E-01 | no |
| 4930465K10Ri | 0.52   | 0.36   | -0.54 | 8.24E-01 | no |
| Tifa         | 116.39 | 127.03 | 0.13  | 8.25E-01 | no |
| Zfp451       | 9.57   | 8.50   | -0.17 | 8.25E-01 | no |
| Nubp2        | 30.62  | 27.51  | -0.15 | 8.25E-01 | no |
| Hiat1        | 25.06  | 22.70  | -0.14 | 8.26E-01 | no |
| Zfp747       | 4.08   | 4.76   | 0.22  | 8.26E-01 | no |
| Ntan1        | 18.59  | 21.16  | 0.19  | 8.26E-01 | no |
| Mdn1         | 15.41  | 14.15  | -0.12 | 8.26E-01 | no |
| Glyatl3      | 0.35   | 0.18   | -0.96 | 8.26E-01 | no |
| Zcchc14      | 0.06   | 0.08   | 0.56  | 8.26E-01 | no |
| Naip6        | 0.45   | 0.56   | 0.30  | 8.26E-01 | no |
| Rpap1        | 17.70  | 16.26  | -0.12 | 8.26E-01 | no |
| A730008H23R  | 49.75  | 45.49  | -0.13 | 8.26E-01 | no |
| Pank4        | 24.17  | 21.93  | -0.14 | 8.26E-01 | no |
| Cndp2        | 18.14  | 16.25  | -0.16 | 8.26E-01 | no |
| Ccdc101      | 12.57  | 10.86  | -0.21 | 8.26E-01 | no |
| Gpr153       | 0.07   | 0.04   | -0.96 | 8.26E-01 | no |
| Pgm5         | 0.03   | 0.01   | -1.05 | 8.26E-01 | no |
| Psmb1        | 60.93  | 55.23  | -0.14 | 8.26E-01 | no |
| Cops8        | 22.47  | 20.13  | -0.16 | 8.26E-01 | no |
| Slc25a32     | 8.03   | 7.01   | -0.20 | 8.26E-01 | no |
| Fam131a      | 0.07   | 0.13   | 0.95  | 8.26E-01 | no |
| Mef2a        | 16.29  | 18.08  | 0.15  | 8.26E-01 | no |
| Chmp6        | 20.12  | 17.94  | -0.17 | 8.26E-01 | no |
| Plekhg4      | 0.26   | 0.20   | -0.40 | 8.27E-01 | no |
| Tmem214      | 18.09  | 16.33  | -0.15 | 8.27E-01 | no |
| Gm4925       | 0.33   | 0.21   | -0.66 | 8.27E-01 | no |
| Slc25a42     | 3.68   | 3.14   | -0.23 | 8.27E-01 | no |
| Kcna10       | 0.19   | 0.11   | -0.75 | 8.27E-01 | no |
| Megf8        | 0.44   | 0.53   | 0.27  | 8.27E-01 | no |
| Prdm4        | 15.99  | 14.50  | -0.14 | 8.27E-01 | no |

|              |       |        |       |          |    |
|--------------|-------|--------|-------|----------|----|
| Gm1337       | 1.61  | 1.35   | -0.25 | 8.27E-01 | no |
| C030044B11Ri | 5.78  | 6.85   | 0.24  | 8.27E-01 | no |
| Zfp513       | 14.41 | 16.01  | 0.15  | 8.27E-01 | no |
| Prrc1        | 13.04 | 14.38  | 0.14  | 8.27E-01 | no |
| 1700052N19Ri | 24.53 | 22.15  | -0.15 | 8.27E-01 | no |
| Mapk7        | 15.18 | 13.66  | -0.15 | 8.27E-01 | no |
| Plekha1      | 9.49  | 8.38   | -0.18 | 8.27E-01 | no |
| Mtx2         | 14.29 | 12.39  | -0.20 | 8.27E-01 | no |
| Cd28         | 0.56  | 0.44   | -0.34 | 8.27E-01 | no |
| Rasa3        | 26.64 | 24.29  | -0.13 | 8.27E-01 | no |
| Hiatl1       | 21.58 | 19.61  | -0.14 | 8.27E-01 | no |
| Klhl22       | 12.56 | 14.05  | 0.16  | 8.27E-01 | no |
| Utp15        | 16.19 | 14.67  | -0.14 | 8.27E-01 | no |
| Vapb         | 9.43  | 8.55   | -0.14 | 8.28E-01 | no |
| Lars2        | 98.63 | 107.53 | 0.12  | 8.28E-01 | no |
| Gm6251       | 81.94 | 73.95  | -0.15 | 8.28E-01 | no |
| Ica1l        | 0.08  | 0.04   | -0.96 | 8.28E-01 | no |
| Gm8221       | 0.00  | 0.02   | 2.46  | 8.28E-01 | no |
| Siglec15     | 0.58  | 0.79   | 0.44  | 8.28E-01 | no |
| Sptlc2       | 10.52 | 11.74  | 0.16  | 8.28E-01 | no |
| Atxn7l3      | 32.17 | 29.70  | -0.12 | 8.28E-01 | no |
| Tomm70a      | 37.37 | 34.26  | -0.13 | 8.28E-01 | no |
| Psmb4        | 67.01 | 60.83  | -0.14 | 8.28E-01 | no |
| 1600012F09Ri | 9.73  | 8.63   | -0.17 | 8.28E-01 | no |
| Cox11        | 8.39  | 7.28   | -0.20 | 8.28E-01 | no |
| Ptgs1        | 0.82  | 0.64   | -0.36 | 8.28E-01 | no |
| Clnk         | 0.15  | 0.08   | -0.95 | 8.28E-01 | no |
| Tmem62       | 4.13  | 4.82   | 0.22  | 8.28E-01 | no |
| Zhx2         | 9.41  | 10.47  | 0.15  | 8.28E-01 | no |
| Banp         | 9.53  | 8.67   | -0.14 | 8.28E-01 | no |
| Pcx          | 2.54  | 2.08   | -0.29 | 8.29E-01 | no |
| Prg4         | 0.40  | 0.54   | 0.44  | 8.29E-01 | no |
| Col4a3       | 0.01  | 0.02   | 1.24  | 8.29E-01 | no |
| LOC668917    | 0.16  | 0.07   | -1.21 | 8.29E-01 | no |
| Htatsf1      | 23.10 | 21.01  | -0.14 | 8.29E-01 | no |
| Spg11        | 9.83  | 10.77  | 0.13  | 8.29E-01 | no |
| Slc39a9      | 19.25 | 17.59  | -0.13 | 8.30E-01 | no |
| Cpne2        | 7.15  | 6.21   | -0.20 | 8.30E-01 | no |
| Gm5766       | 0.07  | 0.02   | -1.96 | 8.30E-01 | no |
| Foxr1        | 0.11  | 0.19   | 0.82  | 8.30E-01 | no |
| Tmx3         | 19.68 | 21.61  | 0.13  | 8.30E-01 | no |
| Ppox         | 19.07 | 21.27  | 0.16  | 8.30E-01 | no |

|              |        |        |       |          |    |
|--------------|--------|--------|-------|----------|----|
| 1810063B05Ri | 16.82  | 14.48  | -0.22 | 8.30E-01 | no |
| Tm7sf2       | 4.01   | 3.33   | -0.27 | 8.30E-01 | no |
| 2810025M15R  | 8.63   | 7.37   | -0.23 | 8.30E-01 | no |
| Gm5803       | 31.87  | 28.50  | -0.16 | 8.30E-01 | no |
| 2310033P09Ri | 12.92  | 14.75  | 0.19  | 8.30E-01 | no |
| Fbxo7        | 13.38  | 15.10  | 0.17  | 8.30E-01 | no |
| Ppp2r1b      | 23.24  | 21.38  | -0.12 | 8.30E-01 | no |
| Ppp2cb       | 28.07  | 25.30  | -0.15 | 8.30E-01 | no |
| Psma2        | 49.82  | 44.88  | -0.15 | 8.30E-01 | no |
| 6-Sep        | 54.49  | 50.56  | -0.11 | 8.31E-01 | no |
| Ccdc157      | 2.30   | 2.66   | 0.21  | 8.31E-01 | no |
| F10          | 0.25   | 0.34   | 0.47  | 8.31E-01 | no |
| Lta4h        | 42.81  | 39.13  | -0.13 | 8.31E-01 | no |
| Mapk8ip2     | 0.02   | 0.06   | 1.41  | 8.31E-01 | no |
| Lrrcc1       | 19.65  | 18.15  | -0.11 | 8.32E-01 | no |
| Rrh          | 0.16   | 0.06   | -1.45 | 8.32E-01 | no |
| Fhl3         | 7.90   | 6.77   | -0.22 | 8.32E-01 | no |
| Gm10012      | 24.08  | 20.26  | -0.25 | 8.32E-01 | no |
| Gapvd1       | 23.35  | 21.43  | -0.12 | 8.32E-01 | no |
| Llph         | 53.98  | 49.06  | -0.14 | 8.32E-01 | no |
| Inpp5e       | 11.16  | 12.32  | 0.14  | 8.32E-01 | no |
| Fbxo21       | 10.22  | 9.18   | -0.16 | 8.32E-01 | no |
| 2010320M18R  | 2.74   | 3.39   | 0.31  | 8.33E-01 | no |
| Mnd1         | 11.29  | 9.62   | -0.23 | 8.33E-01 | no |
| Cfi          | 0.20   | 0.29   | 0.51  | 8.33E-01 | no |
| Immp1l       | 11.37  | 13.32  | 0.23  | 8.33E-01 | no |
| 1810012P15Ri | 4.21   | 4.78   | 0.19  | 8.33E-01 | no |
| Gm2176       | 0.08   | 0.15   | 0.96  | 8.33E-01 | no |
| Snx21        | 2.31   | 2.79   | 0.27  | 8.33E-01 | no |
| Acsf2        | 21.03  | 19.13  | -0.14 | 8.33E-01 | no |
| Rspry1       | 14.26  | 12.88  | -0.15 | 8.33E-01 | no |
| 2310047B19Ri | 6.85   | 5.89   | -0.22 | 8.33E-01 | no |
| Ccl9         | 0.70   | 0.54   | -0.36 | 8.33E-01 | no |
| Capn12       | 0.06   | 0.11   | 0.78  | 8.33E-01 | no |
| Iffo1        | 17.05  | 18.68  | 0.13  | 8.33E-01 | no |
| Usp34        | 27.86  | 25.60  | -0.12 | 8.33E-01 | no |
| Gm9786       | 392.35 | 360.27 | -0.12 | 8.33E-01 | no |
| Cpt2         | 9.40   | 8.26   | -0.19 | 8.33E-01 | no |
| Arhgap28     | 0.06   | 0.10   | 0.61  | 8.33E-01 | no |
| Acap3        | 8.44   | 7.58   | -0.16 | 8.33E-01 | no |
| Trmt1        | 29.94  | 27.51  | -0.12 | 8.33E-01 | no |
| Rgl2         | 23.40  | 25.63  | 0.13  | 8.34E-01 | no |

|              |        |        |       |          |    |
|--------------|--------|--------|-------|----------|----|
| Paqr9        | 0.14   | 0.08   | -0.80 | 8.34E-01 | no |
| Rab1b        | 51.49  | 47.15  | -0.13 | 8.34E-01 | no |
| 2310028O11Ri | 16.93  | 15.28  | -0.15 | 8.34E-01 | no |
| Tsen54       | 11.69  | 10.32  | -0.18 | 8.34E-01 | no |
| Tmem223      | 29.23  | 25.63  | -0.19 | 8.34E-01 | no |
| Arc          | 3.65   | 3.13   | -0.22 | 8.34E-01 | no |
| Rpusd3       | 5.40   | 4.55   | -0.25 | 8.34E-01 | no |
| Ociad2       | 0.42   | 0.31   | -0.46 | 8.34E-01 | no |
| Megf11       | 0.13   | 0.20   | 0.57  | 8.34E-01 | no |
| Zfp867       | 3.82   | 4.44   | 0.21  | 8.34E-01 | no |
| Zfp74        | 3.47   | 4.02   | 0.21  | 8.34E-01 | no |
| 2310015A10Ri | 3.39   | 3.89   | 0.20  | 8.34E-01 | no |
| Vps37a       | 6.69   | 7.45   | 0.16  | 8.34E-01 | no |
| 2610002M06R  | 11.07  | 12.19  | 0.14  | 8.34E-01 | no |
| Snx19        | 9.62   | 10.59  | 0.14  | 8.34E-01 | no |
| B3galnt2     | 18.64  | 20.46  | 0.13  | 8.34E-01 | no |
| Camta2       | 10.46  | 11.46  | 0.13  | 8.34E-01 | no |
| Patz1        | 32.87  | 35.91  | 0.13  | 8.34E-01 | no |
| Hps5         | 12.69  | 13.81  | 0.12  | 8.34E-01 | no |
| Ets1         | 94.51  | 102.24 | 0.11  | 8.34E-01 | no |
| Rpl13a       | 404.38 | 371.98 | -0.12 | 8.34E-01 | no |
| Ddost        | 38.93  | 35.59  | -0.13 | 8.34E-01 | no |
| Pygo2        | 26.33  | 24.03  | -0.13 | 8.34E-01 | no |
| Adh5         | 39.43  | 35.80  | -0.14 | 8.34E-01 | no |
| Prcc         | 25.97  | 23.57  | -0.14 | 8.34E-01 | no |
| 4632415L05Ri | 6.89   | 6.10   | -0.18 | 8.34E-01 | no |
| Fntb         | 9.82   | 8.68   | -0.18 | 8.34E-01 | no |
| Mrpl41       | 11.12  | 9.82   | -0.18 | 8.34E-01 | no |
| Egr1         | 5.49   | 4.75   | -0.21 | 8.34E-01 | no |
| Iah1         | 10.94  | 9.32   | -0.23 | 8.34E-01 | no |
| Nod1         | 0.83   | 0.67   | -0.32 | 8.34E-01 | no |
| Dpf3         | 0.22   | 0.13   | -0.75 | 8.34E-01 | no |
| Cda          | 0.11   | 0.26   | 1.24  | 8.34E-01 | no |
| Ufsp1        | 0.80   | 1.06   | 0.40  | 8.34E-01 | no |
| Trip10       | 4.44   | 5.17   | 0.22  | 8.34E-01 | no |
| Git2         | 42.40  | 45.24  | 0.09  | 8.34E-01 | no |
| Sdccag3      | 30.31  | 27.81  | -0.12 | 8.34E-01 | no |
| 9930014A18Ri | 0.70   | 0.85   | 0.28  | 8.34E-01 | no |
| Nudt9        | 14.76  | 12.99  | -0.18 | 8.34E-01 | no |
| Srsf13b      | 0.03   | 0.08   | 1.24  | 8.34E-01 | no |
| Cgrrf1       | 8.16   | 9.53   | 0.22  | 8.34E-01 | no |
| Gmpr         | 8.96   | 10.28  | 0.20  | 8.34E-01 | no |

|                |       |       |       |          |    |
|----------------|-------|-------|-------|----------|----|
| Miip           | 26.09 | 23.63 | -0.14 | 8.34E-01 | no |
| Bcs1l          | 9.27  | 8.06  | -0.20 | 8.34E-01 | no |
| Zfp750         | 0.04  | 0.01  | -1.93 | 8.34E-01 | no |
| Mfsd7c         | 0.10  | 0.15  | 0.59  | 8.34E-01 | no |
| Mblac2         | 2.01  | 2.39  | 0.25  | 8.34E-01 | no |
| Vopp1          | 4.14  | 4.80  | 0.22  | 8.34E-01 | no |
| Etnk1          | 52.40 | 48.24 | -0.12 | 8.34E-01 | no |
| Plp2           | 43.46 | 38.89 | -0.16 | 8.34E-01 | no |
| C2cd2l         | 6.91  | 6.17  | -0.16 | 8.34E-01 | no |
| Tas2r137       | 0.25  | 0.09  | -1.43 | 8.34E-01 | no |
| Tab2           | 42.56 | 39.16 | -0.12 | 8.34E-01 | no |
| Stk36          | 0.17  | 0.13  | -0.41 | 8.34E-01 | no |
| Sgpp1          | 14.68 | 13.21 | -0.15 | 8.35E-01 | no |
| Cdkn1c         | 1.34  | 1.06  | -0.34 | 8.35E-01 | no |
| Epm2aip1       | 19.62 | 18.00 | -0.12 | 8.35E-01 | no |
| 1810022K09Ri   | 47.68 | 41.54 | -0.20 | 8.35E-01 | no |
| Apof           | 0.07  | 0.13  | 0.89  | 8.35E-01 | no |
| Cyp2r1         | 2.40  | 2.93  | 0.28  | 8.35E-01 | no |
| Nhlrc3         | 6.10  | 7.12  | 0.22  | 8.35E-01 | no |
| Hscb           | 12.35 | 14.39 | 0.22  | 8.35E-01 | no |
| Tnks           | 13.56 | 12.41 | -0.13 | 8.35E-01 | no |
| Slc30a9        | 18.31 | 16.62 | -0.14 | 8.35E-01 | no |
| Nae1           | 12.47 | 10.94 | -0.19 | 8.35E-01 | no |
| Bpgm           | 7.26  | 6.29  | -0.21 | 8.35E-01 | no |
| Leng1          | 5.81  | 6.67  | 0.20  | 8.35E-01 | no |
| Mfge8          | 11.54 | 12.92 | 0.16  | 8.35E-01 | no |
| Zfp119b        | 3.84  | 4.56  | 0.25  | 8.35E-01 | no |
| Ltc4s          | 0.68  | 1.00  | 0.55  | 8.36E-01 | no |
| Zdhhc20        | 17.80 | 19.49 | 0.13  | 8.36E-01 | no |
| Dhx8           | 20.43 | 18.72 | -0.13 | 8.36E-01 | no |
| 4933427D14Ri   | 10.19 | 9.20  | -0.15 | 8.36E-01 | no |
| Necap1         | 11.98 | 10.62 | -0.17 | 8.36E-01 | no |
| Fert2          | 0.64  | 0.50  | -0.35 | 8.36E-01 | no |
| Hsd17b14       | 0.06  | 0.14  | 1.23  | 8.36E-01 | no |
| Mtfmt          | 8.27  | 9.46  | 0.19  | 8.36E-01 | no |
| 2200002D01Ri   | 3.42  | 4.24  | 0.31  | 8.36E-01 | no |
| Eif2ak2        | 14.26 | 15.66 | 0.13  | 8.36E-01 | no |
| Irf2bp1        | 27.27 | 24.93 | -0.13 | 8.36E-01 | no |
| Nans           | 28.47 | 25.89 | -0.14 | 8.36E-01 | no |
| Exoc8          | 7.84  | 7.12  | -0.14 | 8.36E-01 | no |
| Drp2           | 0.60  | 0.50  | -0.27 | 8.36E-01 | no |
| Hist1h2ao,Hist | 1.86  | 1.42  | -0.39 | 8.36E-01 | no |

|              |        |        |       |          |    |
|--------------|--------|--------|-------|----------|----|
| Zfp697       | 0.10   | 0.14   | 0.49  | 8.36E-01 | no |
| Eef2         | 462.02 | 416.13 | -0.15 | 8.36E-01 | no |
| Nacc2        | 0.29   | 0.37   | 0.36  | 8.37E-01 | no |
| Ddx49        | 18.11  | 16.31  | -0.15 | 8.37E-01 | no |
| Wnt2b        | 0.12   | 0.17   | 0.50  | 8.37E-01 | no |
| Pam          | 0.94   | 1.13   | 0.27  | 8.37E-01 | no |
| Ankra2       | 8.53   | 9.81   | 0.20  | 8.37E-01 | no |
| Cc2d1a       | 10.45  | 11.59  | 0.15  | 8.37E-01 | no |
| Aff4         | 13.33  | 14.51  | 0.12  | 8.37E-01 | no |
| Psma3        | 48.01  | 43.68  | -0.14 | 8.37E-01 | no |
| Ivd          | 27.76  | 25.24  | -0.14 | 8.37E-01 | no |
| Med19        | 15.99  | 14.25  | -0.17 | 8.37E-01 | no |
| Ier3ip1      | 23.04  | 20.44  | -0.17 | 8.37E-01 | no |
| Peg12        | 0.35   | 0.26   | -0.42 | 8.37E-01 | no |
| BC037032     | 0.11   | 0.08   | -0.55 | 8.37E-01 | no |
| Aldh1a1      | 0.08   | 0.04   | -1.17 | 8.37E-01 | no |
| Nacad        | 0.55   | 0.67   | 0.28  | 8.37E-01 | no |
| Polb         | 13.17  | 11.46  | -0.20 | 8.37E-01 | no |
| Butr1        | 0.08   | 0.18   | 1.23  | 8.37E-01 | no |
| Rimkla       | 0.02   | 0.06   | 1.19  | 8.37E-01 | no |
| Zfp654       | 11.51  | 10.37  | -0.15 | 8.37E-01 | no |
| Rpgrip1l     | 4.31   | 3.83   | -0.17 | 8.37E-01 | no |
| B230319C09Ri | 0.35   | 0.47   | 0.43  | 8.37E-01 | no |
| Tmbim1       | 3.51   | 4.11   | 0.23  | 8.37E-01 | no |
| Mccc2        | 4.97   | 5.77   | 0.21  | 8.37E-01 | no |
| Acot2        | 6.71   | 7.70   | 0.20  | 8.37E-01 | no |
| Ppp1r15b     | 46.44  | 42.80  | -0.12 | 8.37E-01 | no |
| Zik1         | 6.96   | 6.16   | -0.18 | 8.37E-01 | no |
| 1110020A21Ri | 1.34   | 1.02   | -0.39 | 8.37E-01 | no |
| Morn1        | 0.39   | 0.28   | -0.47 | 8.37E-01 | no |
| Skint3       | 0.06   | 0.02   | -1.44 | 8.37E-01 | no |
| Atg4b        | 13.49  | 12.14  | -0.15 | 8.38E-01 | no |
| Tet2         | 5.90   | 6.49   | 0.14  | 8.38E-01 | no |
| Ykt6         | 34.82  | 31.92  | -0.13 | 8.38E-01 | no |
| Upf3b        | 22.32  | 20.23  | -0.14 | 8.38E-01 | no |
| Grik4        | 0.08   | 0.05   | -0.76 | 8.38E-01 | no |
| Traf3ip3     | 28.88  | 31.58  | 0.13  | 8.38E-01 | no |
| Pak2         | 40.59  | 37.36  | -0.12 | 8.38E-01 | no |
| Gcfc1        | 23.21  | 21.25  | -0.13 | 8.38E-01 | no |
| Serpinb6c    | 0.09   | 0.18   | 1.02  | 8.38E-01 | no |
| Gda          | 0.74   | 0.90   | 0.28  | 8.38E-01 | no |
| Hpgd         | 0.36   | 0.25   | -0.52 | 8.38E-01 | no |

|              |       |       |       |          |    |
|--------------|-------|-------|-------|----------|----|
| Btn1a1       | 0.03  | 0.07  | 1.22  | 8.38E-01 | no |
| 1700125H20Ri | 0.09  | 0.20  | 1.22  | 8.39E-01 | no |
| Nrd1         | 33.36 | 30.69 | -0.12 | 8.39E-01 | no |
| Dpp8         | 37.84 | 34.86 | -0.12 | 8.39E-01 | no |
| D8ErtD738e   | 45.45 | 40.69 | -0.16 | 8.39E-01 | no |
| E130309F12Ri | 0.16  | 0.22  | 0.48  | 8.39E-01 | no |
| Zfp637       | 9.07  | 7.79  | -0.22 | 8.39E-01 | no |
| Nit2         | 10.04 | 11.59 | 0.21  | 8.39E-01 | no |
| Zfp868       | 11.42 | 12.78 | 0.16  | 8.39E-01 | no |
| Snw1         | 32.84 | 30.05 | -0.13 | 8.39E-01 | no |
| 5430435G22Ri | 0.08  | 0.04  | -0.99 | 8.39E-01 | no |
| Ddrgk1       | 17.48 | 19.68 | 0.17  | 8.39E-01 | no |
| Cyld         | 14.66 | 15.69 | 0.10  | 8.39E-01 | no |
| Gfap         | 0.03  | 0.07  | 1.36  | 8.40E-01 | no |
| Slc7a4       | 0.03  | 0.07  | 1.21  | 8.40E-01 | no |
| Gpx7         | 1.43  | 1.79  | 0.32  | 8.40E-01 | no |
| Tmem218      | 7.38  | 8.69  | 0.24  | 8.40E-01 | no |
| Smurf1       | 5.19  | 5.78  | 0.15  | 8.40E-01 | no |
| Pxmp3        | 13.08 | 14.55 | 0.15  | 8.40E-01 | no |
| Lrch3        | 14.12 | 15.41 | 0.13  | 8.40E-01 | no |
| Zkscan17     | 33.16 | 30.83 | -0.11 | 8.40E-01 | no |
| Kpna4        | 34.65 | 31.86 | -0.12 | 8.40E-01 | no |
| Pja2         | 15.12 | 13.89 | -0.12 | 8.40E-01 | no |
| Myl12b       | 62.64 | 57.07 | -0.13 | 8.40E-01 | no |
| Sdhd         | 44.29 | 40.22 | -0.14 | 8.40E-01 | no |
| Fadd         | 6.34  | 5.55  | -0.19 | 8.40E-01 | no |
| Dnajb5       | 5.92  | 5.13  | -0.21 | 8.40E-01 | no |
| I830012O16Ri | 0.83  | 0.65  | -0.35 | 8.40E-01 | no |
| Mslnl        | 0.06  | 0.03  | -1.10 | 8.40E-01 | no |
| 4930594C11Ri | 1.85  | 1.54  | -0.27 | 8.40E-01 | no |
| Osbpl7       | 9.00  | 10.00 | 0.15  | 8.40E-01 | no |
| A330035P11Ri | 0.67  | 0.84  | 0.31  | 8.40E-01 | no |
| Pik3c3       | 18.35 | 16.69 | -0.14 | 8.40E-01 | no |
| Fam100a      | 23.43 | 21.03 | -0.16 | 8.40E-01 | no |
| Kcnip4       | 1.75  | 1.43  | -0.29 | 8.40E-01 | no |
| Retsat       | 4.60  | 5.36  | 0.22  | 8.40E-01 | no |
| Amt          | 2.75  | 2.26  | -0.28 | 8.40E-01 | no |
| St7          | 6.09  | 6.99  | 0.20  | 8.40E-01 | no |
| Zfp961       | 18.91 | 20.88 | 0.14  | 8.40E-01 | no |
| 2010001E11Ri | 0.13  | 0.20  | 0.62  | 8.40E-01 | no |
| Esf1         | 12.38 | 11.16 | -0.15 | 8.40E-01 | no |
| Msrh3        | 0.48  | 0.37  | -0.36 | 8.40E-01 | no |

|              |       |       |       |          |    |
|--------------|-------|-------|-------|----------|----|
| Osbpl11      | 12.05 | 13.23 | 0.13  | 8.40E-01 | no |
| Hist1h2ac    | 0.14  | 0.21  | 0.59  | 8.41E-01 | no |
| Zfp719       | 3.20  | 3.67  | 0.20  | 8.41E-01 | no |
| Mdm4         | 49.31 | 45.43 | -0.12 | 8.41E-01 | no |
| Gpn3         | 19.07 | 16.97 | -0.17 | 8.41E-01 | no |
| Dnajc12      | 2.75  | 2.24  | -0.29 | 8.41E-01 | no |
| Col4a3bp     | 24.02 | 22.30 | -0.11 | 8.41E-01 | no |
| Zfp955b      | 10.08 | 8.99  | -0.17 | 8.41E-01 | no |
| Zfp446       | 5.46  | 6.09  | 0.16  | 8.41E-01 | no |
| Cep120       | 17.63 | 16.15 | -0.13 | 8.41E-01 | no |
| Rnf181       | 35.68 | 32.32 | -0.14 | 8.41E-01 | no |
| Scube1       | 0.01  | 0.03  | 0.92  | 8.41E-01 | no |
| Phf11        | 0.62  | 0.81  | 0.39  | 8.41E-01 | no |
| Sdhaf1       | 11.60 | 13.37 | 0.20  | 8.41E-01 | no |
| Cdc42se1     | 50.94 | 47.11 | -0.11 | 8.41E-01 | no |
| Slmap        | 20.69 | 18.99 | -0.12 | 8.42E-01 | no |
| Tmem139      | 0.16  | 0.06  | -1.39 | 8.42E-01 | no |
| 4930528A17Ri | 0.27  | 0.37  | 0.46  | 8.42E-01 | no |
| Tgfb1        | 1.31  | 1.57  | 0.27  | 8.42E-01 | no |
| Fam168a      | 11.23 | 10.26 | -0.13 | 8.42E-01 | no |
| Adpgk        | 15.53 | 13.98 | -0.15 | 8.42E-01 | no |
| Ndufc2       | 44.55 | 39.72 | -0.17 | 8.42E-01 | no |
| Prox2        | 1.83  | 1.53  | -0.25 | 8.42E-01 | no |
| Tub          | 0.04  | 0.02  | -0.98 | 8.42E-01 | no |
| Appl1        | 17.15 | 15.77 | -0.12 | 8.42E-01 | no |
| Ccdc72       | 19.32 | 16.72 | -0.21 | 8.42E-01 | no |
| Dpp9         | 24.10 | 22.13 | -0.12 | 8.42E-01 | no |
| Uck2         | 33.48 | 30.38 | -0.14 | 8.42E-01 | no |
| Fahd1        | 3.47  | 4.13  | 0.25  | 8.42E-01 | no |
| St14         | 3.61  | 4.12  | 0.19  | 8.43E-01 | no |
| Ogfrl1       | 13.68 | 15.00 | 0.13  | 8.43E-01 | no |
| 1700001K19Ri | 0.19  | 0.31  | 0.69  | 8.43E-01 | no |
| Vnn1         | 0.09  | 0.03  | -1.38 | 8.43E-01 | no |
| Dnmt3b       | 8.29  | 9.14  | 0.14  | 8.43E-01 | no |
| Sdr42e1      | 1.57  | 1.87  | 0.25  | 8.43E-01 | no |
| Ccnl1        | 33.33 | 36.38 | 0.13  | 8.43E-01 | no |
| Zfp148       | 17.98 | 16.58 | -0.12 | 8.43E-01 | no |
| Taldo1       | 55.99 | 51.27 | -0.13 | 8.43E-01 | no |
| E2f6         | 14.81 | 13.38 | -0.15 | 8.43E-01 | no |
| Ubl4         | 30.38 | 26.74 | -0.18 | 8.43E-01 | no |
| Gm11517      | 1.17  | 0.88  | -0.41 | 8.43E-01 | no |
| Nhedc2       | 0.20  | 0.13  | -0.59 | 8.43E-01 | no |



|              |       |       |       |          |    |
|--------------|-------|-------|-------|----------|----|
| B230217C12Ri | 0.40  | 0.56  | 0.49  | 8.43E-01 | no |
| Mrpl46       | 20.07 | 17.74 | -0.18 | 8.44E-01 | no |
| Psemb11      | 0.04  | 0.02  | -1.37 | 8.44E-01 | no |
| Krt10        | 1.82  | 1.51  | -0.26 | 8.44E-01 | no |
| Atg5         | 16.47 | 14.81 | -0.15 | 8.44E-01 | no |
| Ubp1         | 33.10 | 35.49 | 0.10  | 8.44E-01 | no |
| Bin1         | 44.14 | 40.76 | -0.12 | 8.44E-01 | no |
| Dolpp1       | 12.50 | 11.12 | -0.17 | 8.44E-01 | no |
| Ccdc28b      | 11.35 | 13.12 | 0.21  | 8.44E-01 | no |
| Alcam        | 0.66  | 0.81  | 0.28  | 8.45E-01 | no |
| Narg2        | 9.72  | 10.77 | 0.15  | 8.45E-01 | no |
| Mesdc2       | 14.29 | 15.62 | 0.13  | 8.45E-01 | no |
| Acbd3        | 23.37 | 21.42 | -0.13 | 8.45E-01 | no |
| Ddx52        | 21.64 | 19.78 | -0.13 | 8.45E-01 | no |
| Dgcr14       | 13.30 | 12.05 | -0.14 | 8.45E-01 | no |
| Hpse         | 2.38  | 2.01  | -0.24 | 8.45E-01 | no |
| Tbrg3        | 0.19  | 0.15  | -0.36 | 8.45E-01 | no |
| Cxcr6        | 0.33  | 0.23  | -0.51 | 8.45E-01 | no |
| Agphd1       | 0.20  | 0.25  | 0.37  | 8.45E-01 | no |
| C4a          | 0.14  | 0.11  | -0.42 | 8.45E-01 | no |
| Maged1       | 6.02  | 6.83  | 0.18  | 8.45E-01 | no |
| T2           | 0.17  | 0.10  | -0.74 | 8.45E-01 | no |
| 9030619P08Ri | 0.13  | 0.29  | 1.19  | 8.45E-01 | no |
| Klc2         | 5.18  | 5.88  | 0.18  | 8.45E-01 | no |
| Atp6v0a2     | 16.17 | 17.76 | 0.14  | 8.45E-01 | no |
| Zhx3         | 4.39  | 3.86  | -0.18 | 8.45E-01 | no |
| Actr6        | 8.83  | 7.66  | -0.21 | 8.45E-01 | no |
| Ctf1         | 0.17  | 0.27  | 0.71  | 8.45E-01 | no |
| Ppp1r16a     | 11.73 | 10.54 | -0.15 | 8.45E-01 | no |
| Atp6v0a1     | 3.17  | 2.74  | -0.21 | 8.45E-01 | no |
| Myo18a       | 12.14 | 11.17 | -0.12 | 8.45E-01 | no |
| Tmprss13     | 0.06  | 0.02  | -1.36 | 8.45E-01 | no |
| Snrnp48      | 15.62 | 13.89 | -0.17 | 8.45E-01 | no |
| Atp13a3      | 55.03 | 51.82 | -0.09 | 8.46E-01 | no |
| Derl1        | 25.22 | 27.50 | 0.12  | 8.46E-01 | no |
| 1500004A13Ri | 3.48  | 3.02  | -0.21 | 8.46E-01 | no |
| Umod         | 0.07  | 0.03  | -1.36 | 8.46E-01 | no |
| Araf         | 31.81 | 35.33 | 0.15  | 8.46E-01 | no |
| Mfap1b       | 34.39 | 31.49 | -0.13 | 8.46E-01 | no |
| Lrrc19       | 0.11  | 0.06  | -0.96 | 8.46E-01 | no |
| Zfp879       | 0.38  | 0.50  | 0.38  | 8.46E-01 | no |
| Col18a1      | 0.20  | 0.25  | 0.34  | 8.46E-01 | no |

|              |       |       |       |          |    |
|--------------|-------|-------|-------|----------|----|
| Zfp606       | 9.45  | 10.38 | 0.13  | 8.46E-01 | no |
| 6030458C11Ri | 15.78 | 17.17 | 0.12  | 8.46E-01 | no |
| N4bp2        | 28.81 | 26.59 | -0.12 | 8.46E-01 | no |
| Gm12657      | 0.22  | 0.10  | -1.17 | 8.46E-01 | no |
| 9930013L23Ri | 0.02  | 0.01  | -1.36 | 8.46E-01 | no |
| Ube4a        | 23.11 | 21.32 | -0.12 | 8.46E-01 | no |
| Tln1         | 47.57 | 43.86 | -0.12 | 8.46E-01 | no |
| Mterfd2      | 5.17  | 5.87  | 0.19  | 8.46E-01 | no |
| Dhps         | 16.75 | 18.80 | 0.17  | 8.46E-01 | no |
| Mast3        | 25.07 | 27.16 | 0.12  | 8.46E-01 | no |
| Sars2        | 15.38 | 13.79 | -0.16 | 8.46E-01 | no |
| 4931414P19Ri | 7.30  | 6.43  | -0.18 | 8.46E-01 | no |
| BC088983     | 11.52 | 10.07 | -0.19 | 8.46E-01 | no |
| Fam161b      | 1.41  | 1.18  | -0.26 | 8.46E-01 | no |
| Tctex1d4     | 0.11  | 0.03  | -1.85 | 8.46E-01 | no |
| Gm5712       | 0.23  | 0.37  | 0.64  | 8.46E-01 | no |
| Hmgcl        | 18.49 | 20.65 | 0.16  | 8.46E-01 | no |
| Pnrc2        | 52.46 | 57.01 | 0.12  | 8.46E-01 | no |
| Rnf145       | 35.09 | 32.59 | -0.11 | 8.46E-01 | no |
| 2810002D19Ri | 7.46  | 6.40  | -0.22 | 8.47E-01 | no |
| Bend6        | 0.13  | 0.20  | 0.61  | 8.47E-01 | no |
| Crtap        | 8.99  | 10.23 | 0.19  | 8.47E-01 | no |
| Rpia         | 30.29 | 33.16 | 0.13  | 8.47E-01 | no |
| Epc1         | 28.58 | 26.61 | -0.10 | 8.47E-01 | no |
| Ap2m1        | 55.79 | 51.45 | -0.12 | 8.47E-01 | no |
| Irak1        | 21.44 | 19.93 | -0.11 | 8.48E-01 | no |
| Rpap2        | 7.16  | 8.08  | 0.17  | 8.48E-01 | no |
| Tgm6         | 0.05  | 0.02  | -1.35 | 8.48E-01 | no |
| Cgref1       | 0.08  | 0.18  | 1.17  | 8.48E-01 | no |
| F3           | 0.10  | 0.04  | -1.36 | 8.48E-01 | no |
| Higd2a       | 40.99 | 36.40 | -0.17 | 8.49E-01 | no |
| Rpl11        | 48.69 | 43.70 | -0.16 | 8.49E-01 | no |
| 5430427O19Ri | 4.17  | 4.76  | 0.19  | 8.49E-01 | no |
| Rora         | 0.05  | 0.11  | 1.19  | 8.49E-01 | no |
| Ccdc90a      | 9.85  | 10.87 | 0.14  | 8.49E-01 | no |
| Vta1         | 21.99 | 19.66 | -0.16 | 8.49E-01 | no |
| Csnk2a2      | 10.14 | 9.15  | -0.15 | 8.49E-01 | no |
| 4930539J05Ri | 6.18  | 5.11  | -0.27 | 8.49E-01 | no |
| Yipf6        | 8.48  | 7.64  | -0.15 | 8.49E-01 | no |
| Gmeb2        | 21.54 | 19.81 | -0.12 | 8.49E-01 | no |
| Topors       | 20.43 | 18.75 | -0.12 | 8.49E-01 | no |
| Pabpc5       | 0.11  | 0.06  | -0.87 | 8.49E-01 | no |

|               |       |       |       |          |    |
|---------------|-------|-------|-------|----------|----|
| Mecp2         | 17.45 | 16.32 | -0.10 | 8.49E-01 | no |
| Gemin7        | 32.77 | 29.23 | -0.16 | 8.49E-01 | no |
| Gpr108        | 15.21 | 16.86 | 0.15  | 8.49E-01 | no |
| Abhd10        | 10.42 | 9.17  | -0.18 | 8.49E-01 | no |
| Klf5          | 0.09  | 0.16  | 0.82  | 8.49E-01 | no |
| Gm7104        | 0.38  | 0.47  | 0.31  | 8.49E-01 | no |
| Pygb          | 19.10 | 20.78 | 0.12  | 8.49E-01 | no |
| Trim35        | 32.39 | 29.88 | -0.12 | 8.49E-01 | no |
| Lclat1        | 8.62  | 7.78  | -0.15 | 8.49E-01 | no |
| BC003266      | 16.98 | 14.95 | -0.18 | 8.49E-01 | no |
| Brp44         | 17.49 | 15.27 | -0.20 | 8.49E-01 | no |
| Clcn1         | 0.15  | 0.10  | -0.51 | 8.49E-01 | no |
| Nppa          | 0.18  | 0.07  | -1.34 | 8.49E-01 | no |
| Zfp599        | 3.14  | 3.62  | 0.20  | 8.49E-01 | no |
| Traf3ip1      | 5.20  | 4.59  | -0.18 | 8.49E-01 | no |
| Taf13         | 14.22 | 12.44 | -0.19 | 8.49E-01 | no |
| Slc4a10       | 0.24  | 0.31  | 0.34  | 8.49E-01 | no |
| Polk          | 6.34  | 7.10  | 0.16  | 8.49E-01 | no |
| Asb1          | 7.56  | 6.87  | -0.14 | 8.49E-01 | no |
| H47           | 17.18 | 19.34 | 0.17  | 8.49E-01 | no |
| Etfb          | 44.65 | 40.38 | -0.14 | 8.50E-01 | no |
| Ccdc114       | 1.20  | 0.99  | -0.27 | 8.50E-01 | no |
| Ext2          | 9.85  | 10.95 | 0.15  | 8.50E-01 | no |
| Dpp4          | 58.81 | 54.98 | -0.10 | 8.50E-01 | no |
| Rps15a        | 11.43 | 10.42 | -0.13 | 8.50E-01 | no |
| Ldhd          | 0.08  | 0.03  | -1.34 | 8.50E-01 | no |
| Crybb3        | 0.31  | 0.46  | 0.60  | 8.50E-01 | no |
| Calr          | 95.23 | 88.12 | -0.11 | 8.50E-01 | no |
| Otub1         | 38.24 | 35.00 | -0.13 | 8.50E-01 | no |
| Nhlrc2        | 11.95 | 10.84 | -0.14 | 8.50E-01 | no |
| Zfp825        | 9.00  | 7.77  | -0.21 | 8.50E-01 | no |
| Fam171a1      | 0.89  | 0.73  | -0.27 | 8.50E-01 | no |
| Tnfsf14       | 0.08  | 0.14  | 0.86  | 8.50E-01 | no |
| 2310033E01Ri  | 0.40  | 0.59  | 0.57  | 8.51E-01 | no |
| Fbxo9         | 13.22 | 14.66 | 0.15  | 8.51E-01 | no |
| 1300018I17Rik | 8.59  | 9.59  | 0.16  | 8.51E-01 | no |
| Ttc16         | 0.16  | 0.22  | 0.46  | 8.51E-01 | no |
| Ccdc19        | 0.28  | 0.20  | -0.47 | 8.51E-01 | no |
| Rnu73b        | 12.75 | 8.27  | -0.62 | 8.51E-01 | no |
| Got1          | 16.32 | 14.70 | -0.15 | 8.51E-01 | no |
| Emilin2       | 0.98  | 1.16  | 0.25  | 8.51E-01 | no |
| 3110052M02R   | 5.36  | 6.04  | 0.17  | 8.51E-01 | no |

|              |       |       |       |          |    |
|--------------|-------|-------|-------|----------|----|
| Supv3l1      | 13.64 | 12.28 | -0.15 | 8.51E-01 | no |
| Snx18        | 6.73  | 6.03  | -0.16 | 8.51E-01 | no |
| Gstp2        | 35.05 | 31.26 | -0.16 | 8.51E-01 | no |
| Nfu1         | 19.33 | 17.16 | -0.17 | 8.51E-01 | no |
| Arfgap2      | 34.29 | 31.86 | -0.11 | 8.51E-01 | no |
| Mcee         | 6.99  | 8.25  | 0.24  | 8.51E-01 | no |
| Nat8l        | 0.92  | 1.09  | 0.23  | 8.51E-01 | no |
| BC048403     | 3.51  | 4.05  | 0.20  | 8.51E-01 | no |
| BC018507     | 15.05 | 16.29 | 0.11  | 8.51E-01 | no |
| Zdhhc21      | 16.84 | 15.55 | -0.12 | 8.51E-01 | no |
| C230081A13Ri | 4.47  | 4.07  | -0.14 | 8.51E-01 | no |
| Vps37b       | 16.64 | 15.09 | -0.14 | 8.51E-01 | no |
| Arl1         | 36.13 | 32.42 | -0.16 | 8.51E-01 | no |
| Nufip1       | 6.97  | 6.22  | -0.16 | 8.51E-01 | no |
| 1810029B16Ri | 9.79  | 8.48  | -0.21 | 8.51E-01 | no |
| 3010026O09Ri | 7.24  | 6.24  | -0.22 | 8.51E-01 | no |
| 1110008P14Ri | 9.58  | 8.17  | -0.23 | 8.51E-01 | no |
| Ache         | 0.77  | 0.61  | -0.34 | 8.51E-01 | no |
| Mapk12       | 0.17  | 0.11  | -0.69 | 8.51E-01 | no |
| D4Ert617e    | 0.42  | 0.24  | -0.78 | 8.51E-01 | no |
| Col4a4       | 0.02  | 0.01  | -1.33 | 8.51E-01 | no |
| Cxx1b        | 8.35  | 9.60  | 0.20  | 8.52E-01 | no |
| Trub2        | 13.30 | 12.04 | -0.14 | 8.52E-01 | no |
| Siglece      | 0.19  | 0.27  | 0.55  | 8.52E-01 | no |
| Khk          | 4.89  | 5.74  | 0.23  | 8.52E-01 | no |
| Hdlbp        | 28.60 | 26.49 | -0.11 | 8.52E-01 | no |
| Ilkap        | 34.66 | 31.58 | -0.13 | 8.52E-01 | no |
| Esd          | 7.15  | 6.18  | -0.21 | 8.52E-01 | no |
| Rtbdn        | 0.37  | 0.27  | -0.42 | 8.52E-01 | no |
| Epor         | 0.16  | 0.09  | -0.74 | 8.52E-01 | no |
| Prok1        | 0.43  | 0.17  | -1.32 | 8.52E-01 | no |
| Prkar2a      | 2.22  | 1.91  | -0.22 | 8.52E-01 | no |
| Rcbtb1       | 12.55 | 13.77 | 0.13  | 8.52E-01 | no |
| Ambra1       | 16.18 | 17.37 | 0.10  | 8.52E-01 | no |
| Dnajb11      | 46.16 | 42.24 | -0.13 | 8.52E-01 | no |
| Slc25a39     | 24.59 | 22.32 | -0.14 | 8.52E-01 | no |
| Jmjd8        | 19.31 | 17.51 | -0.14 | 8.52E-01 | no |
| Xlr3a        | 0.90  | 0.71  | -0.34 | 8.52E-01 | no |
| Arhgap20     | 0.02  | 0.01  | -1.81 | 8.52E-01 | no |
| Tgif2        | 11.07 | 9.94  | -0.15 | 8.52E-01 | no |
| Gcnt4        | 0.10  | 0.07  | -0.54 | 8.52E-01 | no |
| Gm13889      | 0.05  | 0.13  | 1.30  | 8.52E-01 | no |

|              |       |       |       |          |    |
|--------------|-------|-------|-------|----------|----|
| Nras         | 36.23 | 33.51 | -0.11 | 8.52E-01 | no |
| Slx4         | 17.88 | 16.51 | -0.11 | 8.52E-01 | no |
| Cadps2       | 0.04  | 0.02  | -1.33 | 8.52E-01 | no |
| Brsk1        | 0.38  | 1.13  | 1.59  | 8.52E-01 | no |
| P2ry6        | 0.08  | 0.13  | 0.79  | 8.53E-01 | no |
| Dlx1         | 2.22  | 2.62  | 0.24  | 8.53E-01 | no |
| Ptpn2        | 17.74 | 16.00 | -0.15 | 8.53E-01 | no |
| Nqo1         | 0.10  | 0.17  | 0.78  | 8.53E-01 | no |
| Bag3         | 0.17  | 0.24  | 0.46  | 8.53E-01 | no |
| Arsg         | 0.50  | 0.61  | 0.30  | 8.53E-01 | no |
| Ciz1         | 22.72 | 24.68 | 0.12  | 8.53E-01 | no |
| Mapk3        | 28.65 | 26.16 | -0.13 | 8.53E-01 | no |
| Pak1ip1      | 22.65 | 20.52 | -0.14 | 8.53E-01 | no |
| Gm6788       | 45.58 | 41.05 | -0.15 | 8.53E-01 | no |
| Bbs10        | 2.54  | 2.16  | -0.24 | 8.53E-01 | no |
| Rasip1       | 0.13  | 0.09  | -0.57 | 8.53E-01 | no |
| Col17a1      | 0.03  | 0.01  | -1.31 | 8.53E-01 | no |
| Pira6        | 0.03  | 0.08  | 1.51  | 8.53E-01 | no |
| Sh2b2        | 1.07  | 1.29  | 0.27  | 8.53E-01 | no |
| Dcaf11       | 24.06 | 25.90 | 0.11  | 8.53E-01 | no |
| Ccny         | 22.27 | 20.50 | -0.12 | 8.53E-01 | no |
| Narfl        | 11.32 | 10.18 | -0.15 | 8.53E-01 | no |
| Tor1a        | 17.52 | 15.66 | -0.16 | 8.53E-01 | no |
| Map4k5       | 2.87  | 3.28  | 0.20  | 8.53E-01 | no |
| Nle1         | 12.30 | 10.96 | -0.17 | 8.53E-01 | no |
| 1700001J03Ri | 0.24  | 0.10  | -1.32 | 8.53E-01 | no |
| Npepl1       | 29.72 | 32.34 | 0.12  | 8.53E-01 | no |
| Zfp354c      | 3.55  | 3.12  | -0.19 | 8.53E-01 | no |
| Cp           | 0.07  | 0.10  | 0.57  | 8.53E-01 | no |
| Ghdc         | 3.54  | 4.10  | 0.21  | 8.53E-01 | no |
| 15-Sep       | 48.14 | 44.21 | -0.12 | 8.53E-01 | no |
| Cttnal1      | 5.54  | 4.91  | -0.17 | 8.53E-01 | no |
| Arfip2       | 11.26 | 12.39 | 0.14  | 8.54E-01 | no |
| Hmg20b       | 21.82 | 23.85 | 0.13  | 8.54E-01 | no |
| Rlim         | 23.15 | 21.43 | -0.11 | 8.54E-01 | no |
| Rpe          | 20.92 | 19.01 | -0.14 | 8.54E-01 | no |
| Lrrc2        | 0.09  | 0.05  | -0.73 | 8.54E-01 | no |
| Twf2         | 19.71 | 21.74 | 0.14  | 8.54E-01 | no |
| 4930538K18Ri | 0.05  | 0.10  | 1.12  | 8.54E-01 | no |
| 6230409E13Ri | 0.01  | 0.02  | 1.12  | 8.54E-01 | no |
| Apoc2        | 0.11  | 0.25  | 1.12  | 8.54E-01 | no |
| Limch1       | 0.01  | 0.02  | 1.12  | 8.54E-01 | no |

|               |        |        |       |          |    |
|---------------|--------|--------|-------|----------|----|
| Pacrg         | 0.05   | 0.11   | 1.12  | 8.54E-01 | no |
| Pax8          | 0.03   | 0.06   | 1.12  | 8.54E-01 | no |
| Pex11a        | 0.08   | 0.17   | 1.12  | 8.54E-01 | no |
| Sypl2         | 0.02   | 0.05   | 1.12  | 8.54E-01 | no |
| Trpm6         | 0.01   | 0.02   | 1.12  | 8.54E-01 | no |
| Vmn2r57       | 0.03   | 0.06   | 1.12  | 8.54E-01 | no |
| Wif1          | 0.03   | 0.07   | 1.12  | 8.54E-01 | no |
| 1700096J18RiI | 0.59   | 0.88   | 0.58  | 8.54E-01 | no |
| D930020E02Ri  | 0.15   | 0.21   | 0.49  | 8.54E-01 | no |
| Fdx1          | 7.06   | 8.25   | 0.23  | 8.54E-01 | no |
| Rab31         | 4.21   | 4.80   | 0.19  | 8.54E-01 | no |
| N6amt1        | 6.90   | 7.85   | 0.19  | 8.54E-01 | no |
| Tanc1         | 2.00   | 2.26   | 0.18  | 8.54E-01 | no |
| Sil1          | 9.15   | 10.34  | 0.18  | 8.54E-01 | no |
| Rab22a        | 16.21  | 17.96  | 0.15  | 8.54E-01 | no |
| Clk3          | 22.98  | 25.01  | 0.12  | 8.54E-01 | no |
| Ogt           | 62.19  | 67.17  | 0.11  | 8.54E-01 | no |
| Tap1          | 51.61  | 55.44  | 0.10  | 8.54E-01 | no |
| Cdk13         | 23.99  | 25.50  | 0.09  | 8.54E-01 | no |
| Setx          | 28.95  | 26.83  | -0.11 | 8.54E-01 | no |
| Gm15427       | 633.93 | 587.07 | -0.11 | 8.54E-01 | no |
| Diap1         | 25.38  | 23.45  | -0.11 | 8.54E-01 | no |
| Tfip11        | 18.72  | 17.22  | -0.12 | 8.54E-01 | no |
| Rnf34         | 21.91  | 19.90  | -0.14 | 8.54E-01 | no |
| Helq          | 10.00  | 9.05   | -0.14 | 8.54E-01 | no |
| Zwint         | 13.45  | 12.15  | -0.15 | 8.54E-01 | no |
| Supt4h1       | 38.78  | 34.81  | -0.16 | 8.54E-01 | no |
| Slc12a2       | 4.96   | 4.45   | -0.16 | 8.54E-01 | no |
| Slc27a3       | 2.03   | 1.71   | -0.25 | 8.54E-01 | no |
| Ube2cbp       | 1.92   | 1.60   | -0.26 | 8.54E-01 | no |
| Mtus1         | 0.50   | 0.41   | -0.30 | 8.54E-01 | no |
| Arhgap22      | 0.43   | 0.33   | -0.36 | 8.54E-01 | no |
| Krt28         | 0.10   | 0.04   | -1.31 | 8.54E-01 | no |
| Mmgt2         | 11.65  | 13.09  | 0.17  | 8.54E-01 | no |
| Gm7455        | 0.00   | 0.01   | 2.03  | 8.54E-01 | no |
| Hist1h3e      | 0.09   | 0.30   | 1.79  | 8.54E-01 | no |
| Cngb1         | 0.20   | 0.27   | 0.41  | 8.54E-01 | no |
| Mrps6         | 10.73  | 12.38  | 0.21  | 8.54E-01 | no |
| 3110057O12Ri  | 4.26   | 4.91   | 0.21  | 8.54E-01 | no |
| Asb2          | 4.23   | 4.83   | 0.19  | 8.54E-01 | no |
| Bri3bp        | 11.61  | 12.61  | 0.12  | 8.54E-01 | no |
| Ankrd52       | 34.63  | 32.13  | -0.11 | 8.54E-01 | no |

|              |        |       |       |          |    |
|--------------|--------|-------|-------|----------|----|
| Atp5f1       | 102.47 | 94.94 | -0.11 | 8.54E-01 | no |
| Derl2        | 15.44  | 14.07 | -0.13 | 8.54E-01 | no |
| Tiprl        | 10.76  | 9.77  | -0.14 | 8.54E-01 | no |
| Mrpl34       | 33.99  | 30.33 | -0.16 | 8.54E-01 | no |
| Klhl23       | 3.41   | 2.98  | -0.19 | 8.54E-01 | no |
| Efcab7       | 5.36   | 4.62  | -0.21 | 8.54E-01 | no |
| Macrodl      | 5.97   | 5.14  | -0.22 | 8.54E-01 | no |
| Hnrpll       | 1.25   | 1.04  | -0.26 | 8.54E-01 | no |
| Rpl17        | 3.00   | 2.46  | -0.29 | 8.54E-01 | no |
| Dnahc5       | 0.09   | 0.07  | -0.34 | 8.54E-01 | no |
| H2afy3       | 0.17   | 0.11  | -0.64 | 8.54E-01 | no |
| Hes3         | 0.09   | 0.04  | -1.30 | 8.54E-01 | no |
| Ldb1         | 46.45  | 49.62 | 0.10  | 8.54E-01 | no |
| Frmd7        | 1.95   | 2.25  | 0.21  | 8.54E-01 | no |
| Fibcd1       | 0.11   | 0.15  | 0.44  | 8.54E-01 | no |
| C130036L24Ri | 2.50   | 2.98  | 0.26  | 8.54E-01 | no |
| Ergic3       | 27.83  | 30.61 | 0.14  | 8.55E-01 | no |
| Kif1c        | 9.40   | 10.21 | 0.12  | 8.55E-01 | no |
| Gstt1        | 0.29   | 0.18  | -0.71 | 8.55E-01 | no |
| D930048N14R  | 2.91   | 3.35  | 0.21  | 8.55E-01 | no |
| Chd6         | 17.50  | 18.88 | 0.11  | 8.55E-01 | no |
| Sp4          | 13.75  | 12.71 | -0.11 | 8.55E-01 | no |
| Pomp         | 48.94  | 44.34 | -0.14 | 8.55E-01 | no |
| Ddi2         | 20.19  | 21.91 | 0.12  | 8.55E-01 | no |
| Qtrtd1       | 10.74  | 9.63  | -0.16 | 8.55E-01 | no |
| Bcl2l14      | 0.07   | 0.11  | 0.77  | 8.55E-01 | no |
| Ascc1        | 11.53  | 13.04 | 0.18  | 8.55E-01 | no |
| Flot1        | 9.22   | 10.39 | 0.17  | 8.55E-01 | no |
| Srp54b       | 19.23  | 17.60 | -0.13 | 8.55E-01 | no |
| Psmal        | 49.25  | 45.02 | -0.13 | 8.55E-01 | no |
| 3230401D17Ri | 24.62  | 22.32 | -0.14 | 8.55E-01 | no |
| Uggt2        | 0.26   | 0.21  | -0.33 | 8.55E-01 | no |
| C4b          | 0.05   | 0.03  | -0.71 | 8.55E-01 | no |
| Shank3       | 0.01   | 0.02  | 1.13  | 8.55E-01 | no |
| Sh3tc1       | 1.58   | 1.84  | 0.21  | 8.55E-01 | no |
| Mkln1        | 19.33  | 17.77 | -0.12 | 8.55E-01 | no |
| Armc5        | 14.48  | 13.27 | -0.13 | 8.55E-01 | no |
| Cyp4f41-ps   | 1.16   | 0.92  | -0.33 | 8.55E-01 | no |
| Otud6a       | 0.17   | 0.07  | -1.29 | 8.55E-01 | no |
| Tmem158      | 0.54   | 0.69  | 0.35  | 8.55E-01 | no |
| Tgfb1i1      | 0.88   | 1.05  | 0.27  | 8.55E-01 | no |
| Wipf2        | 11.73  | 10.82 | -0.12 | 8.55E-01 | no |

|               |       |       |       |          |    |
|---------------|-------|-------|-------|----------|----|
| Hars2         | 16.07 | 14.66 | -0.13 | 8.55E-01 | no |
| Slc25a47      | 1.67  | 1.38  | -0.27 | 8.55E-01 | no |
| Mkks          | 7.62  | 6.79  | -0.17 | 8.55E-01 | no |
| Gpr152        | 1.01  | 1.21  | 0.26  | 8.55E-01 | no |
| 4930471M23R   | 4.14  | 4.72  | 0.19  | 8.55E-01 | no |
| Zfp444        | 6.45  | 7.15  | 0.15  | 8.55E-01 | no |
| Ifnar1        | 14.56 | 15.77 | 0.11  | 8.55E-01 | no |
| Stx12         | 14.28 | 12.86 | -0.15 | 8.55E-01 | no |
| Bambi         | 0.27  | 0.33  | 0.32  | 8.55E-01 | no |
| Gm4987        | 4.61  | 3.79  | -0.28 | 8.55E-01 | no |
| Impact        | 8.23  | 9.17  | 0.16  | 8.56E-01 | no |
| Naa20         | 26.59 | 23.97 | -0.15 | 8.56E-01 | no |
| Rfx8          | 0.09  | 0.04  | -1.29 | 8.56E-01 | no |
| 1700020114Rik | 53.29 | 49.41 | -0.11 | 8.56E-01 | no |
| Trpv2         | 14.36 | 13.04 | -0.14 | 8.56E-01 | no |
| Scoc          | 16.33 | 14.67 | -0.15 | 8.56E-01 | no |
| Il1a          | 0.16  | 0.10  | -0.72 | 8.56E-01 | no |
| Cat           | 49.20 | 53.16 | 0.11  | 8.56E-01 | no |
| Dus4l         | 5.64  | 4.88  | -0.21 | 8.56E-01 | no |
| Slc25a4       | 52.81 | 48.48 | -0.12 | 8.56E-01 | no |
| Zfp97         | 2.24  | 2.63  | 0.23  | 8.56E-01 | no |
| Tmem159       | 1.35  | 1.66  | 0.30  | 8.56E-01 | no |
| Al854703      | 0.52  | 0.64  | 0.29  | 8.56E-01 | no |
| Znrd1as       | 2.78  | 3.33  | 0.26  | 8.56E-01 | no |
| Tuba4a        | 38.26 | 41.44 | 0.12  | 8.56E-01 | no |
| St3gal4       | 11.83 | 10.56 | -0.16 | 8.56E-01 | no |
| Haus7         | 17.29 | 15.51 | -0.16 | 8.56E-01 | no |
| Map3k9        | 0.18  | 0.14  | -0.30 | 8.56E-01 | no |
| Cox19         | 18.33 | 16.11 | -0.19 | 8.57E-01 | no |
| Trak1         | 37.68 | 34.99 | -0.11 | 8.57E-01 | no |
| Lsm1          | 6.98  | 6.13  | -0.19 | 8.57E-01 | no |
| Atl1          | 0.60  | 0.48  | -0.31 | 8.57E-01 | no |
| Il7r          | 85.91 | 79.78 | -0.11 | 8.57E-01 | no |
| Arid3b        | 5.62  | 6.28  | 0.16  | 8.57E-01 | no |
| Ddr2          | 0.01  | 0.03  | 1.11  | 8.57E-01 | no |
| Tpm2          | 0.15  | 0.21  | 0.52  | 8.57E-01 | no |
| Insm1         | 0.33  | 0.42  | 0.36  | 8.57E-01 | no |
| Dnahc17       | 0.40  | 0.47  | 0.22  | 8.57E-01 | no |
| Trnau1ap      | 11.95 | 13.54 | 0.18  | 8.57E-01 | no |
| 6530402F18Ri  | 6.80  | 7.52  | 0.15  | 8.57E-01 | no |
| 1110003E01Ri  | 45.62 | 42.09 | -0.12 | 8.57E-01 | no |
| Gtf2b         | 27.80 | 25.17 | -0.14 | 8.57E-01 | no |



|               |       |       |       |          |    |
|---------------|-------|-------|-------|----------|----|
| Cox7a2        | 35.79 | 32.09 | -0.16 | 8.57E-01 | no |
| Ydjc          | 8.51  | 7.42  | -0.20 | 8.57E-01 | no |
| Gm5464        | 0.26  | 0.19  | -0.50 | 8.57E-01 | no |
| 1700020A23Ri  | 0.68  | 0.44  | -0.62 | 8.57E-01 | no |
| C1rl          | 0.10  | 0.06  | -0.70 | 8.57E-01 | no |
| Kptn          | 7.03  | 6.16  | -0.19 | 8.57E-01 | no |
| Cdk7          | 5.93  | 6.51  | 0.14  | 8.57E-01 | no |
| Tmx4          | 10.22 | 11.20 | 0.13  | 8.57E-01 | no |
| Igf2bp3       | 15.82 | 17.18 | 0.12  | 8.57E-01 | no |
| Prpf6         | 21.75 | 20.05 | -0.12 | 8.57E-01 | no |
| Gm15455       | 14.96 | 13.68 | -0.13 | 8.57E-01 | no |
| Gm3230        | 1.95  | 1.63  | -0.26 | 8.57E-01 | no |
| Foxi1         | 0.22  | 0.16  | -0.48 | 8.57E-01 | no |
| Gm3448        | 0.45  | 0.26  | -0.81 | 8.57E-01 | no |
| Mmp25         | 0.05  | 0.02  | -1.28 | 8.57E-01 | no |
| Pdia2         | 0.09  | 0.04  | -1.29 | 8.57E-01 | no |
| Slc39a4       | 0.17  | 0.24  | 0.50  | 8.57E-01 | no |
| Bsg           | 53.95 | 50.09 | -0.11 | 8.57E-01 | no |
| A730011L01Ri  | 4.97  | 5.49  | 0.14  | 8.57E-01 | no |
| Rnf24         | 1.21  | 1.03  | -0.23 | 8.57E-01 | no |
| Zbtb25        | 13.87 | 12.42 | -0.16 | 8.58E-01 | no |
| Gltpd1        | 5.79  | 5.10  | -0.18 | 8.58E-01 | no |
| Gnpat         | 30.33 | 28.03 | -0.11 | 8.58E-01 | no |
| Ube4b         | 28.45 | 26.41 | -0.11 | 8.58E-01 | no |
| Tyw3          | 3.21  | 2.81  | -0.19 | 8.58E-01 | no |
| Cdk16         | 24.23 | 22.35 | -0.12 | 8.58E-01 | no |
| Lix1l         | 2.97  | 2.54  | -0.22 | 8.58E-01 | no |
| Tbr1          | 0.05  | 0.02  | -1.27 | 8.58E-01 | no |
| 6330407A03Ri  | 0.07  | 0.02  | -1.79 | 8.58E-01 | no |
| Phf13         | 5.58  | 4.94  | -0.18 | 8.58E-01 | no |
| Ncrna00085    | 0.19  | 0.30  | 0.64  | 8.58E-01 | no |
| Thada         | 8.30  | 7.64  | -0.12 | 8.58E-01 | no |
| Pgap2         | 16.02 | 17.99 | 0.17  | 8.59E-01 | no |
| Csnk1d        | 45.57 | 48.29 | 0.08  | 8.59E-01 | no |
| 2510006D16Ri  | 36.43 | 32.82 | -0.15 | 8.59E-01 | no |
| 9130206I24Rik | 5.28  | 4.66  | -0.18 | 8.59E-01 | no |
| Gpc2          | 7.32  | 6.49  | -0.17 | 8.59E-01 | no |
| Mlkl          | 2.67  | 3.16  | 0.24  | 8.60E-01 | no |
| Adam1a        | 2.10  | 2.44  | 0.22  | 8.60E-01 | no |
| Mrps5         | 20.64 | 18.66 | -0.15 | 8.60E-01 | no |
| Gnb2          | 77.92 | 72.30 | -0.11 | 8.60E-01 | no |
| Kdm3a         | 19.20 | 20.56 | 0.10  | 8.60E-01 | no |

|              |       |       |       |          |    |
|--------------|-------|-------|-------|----------|----|
| Zc3h4        | 35.67 | 33.17 | -0.11 | 8.60E-01 | no |
| Eapp         | 19.43 | 17.35 | -0.16 | 8.60E-01 | no |
| Zfp808       | 5.77  | 5.08  | -0.18 | 8.60E-01 | no |
| Gpr182       | 0.28  | 0.19  | -0.51 | 8.60E-01 | no |
| Nckap1       | 0.14  | 0.20  | 0.46  | 8.60E-01 | no |
| Zkscan3      | 19.52 | 21.14 | 0.12  | 8.60E-01 | no |
| Tmbim4       | 23.38 | 26.33 | 0.17  | 8.60E-01 | no |
| Mgl2         | 0.08  | 0.14  | 0.83  | 8.60E-01 | no |
| Sorbs3       | 0.44  | 0.55  | 0.32  | 8.61E-01 | no |
| Ptrh2        | 12.13 | 11.01 | -0.14 | 8.61E-01 | no |
| 2210403K04Ri | 0.38  | 0.28  | -0.45 | 8.61E-01 | no |
| Usp16        | 15.04 | 13.73 | -0.13 | 8.61E-01 | no |
| Smek2        | 36.18 | 33.61 | -0.11 | 8.61E-01 | no |
| 2410089E03Ri | 5.09  | 5.55  | 0.12  | 8.61E-01 | no |
| Trim39       | 20.53 | 22.14 | 0.11  | 8.61E-01 | no |
| Klhl3        | 0.22  | 0.29  | 0.42  | 8.61E-01 | no |
| Klhl2        | 7.00  | 6.23  | -0.17 | 8.61E-01 | no |
| Zfp689       | 4.95  | 4.39  | -0.17 | 8.61E-01 | no |
| Mrgpra9      | 0.15  | 0.06  | -1.38 | 8.61E-01 | no |
| Snx24        | 0.09  | 0.16  | 0.77  | 8.61E-01 | no |
| Hist1h3i     | 0.95  | 0.67  | -0.51 | 8.61E-01 | no |
| Sh3bgr       | 0.11  | 0.04  | -1.30 | 8.61E-01 | no |
| Zfp534       | 0.03  | 0.06  | 1.31  | 8.62E-01 | no |
| 2810454H06Ri | 0.82  | 0.99  | 0.28  | 8.62E-01 | no |
| Tdg          | 6.24  | 5.28  | -0.24 | 8.62E-01 | no |
| Slc25a18     | 1.19  | 0.97  | -0.30 | 8.62E-01 | no |
| Srms         | 0.03  | 0.06  | 1.07  | 8.62E-01 | no |
| Gstt4        | 0.12  | 0.23  | 0.93  | 8.62E-01 | no |
| AW011738     | 0.51  | 0.63  | 0.32  | 8.62E-01 | no |
| Rnf40        | 26.76 | 24.84 | -0.11 | 8.62E-01 | no |
| Med9         | 11.31 | 10.25 | -0.14 | 8.62E-01 | no |
| Timm17a      | 15.32 | 13.47 | -0.19 | 8.62E-01 | no |
| Tmem25       | 0.13  | 0.08  | -0.69 | 8.62E-01 | no |
| Anxa6        | 23.41 | 25.19 | 0.11  | 8.62E-01 | no |
| Nr2c2        | 35.73 | 33.20 | -0.11 | 8.62E-01 | no |
| Stam2        | 8.87  | 9.77  | 0.14  | 8.62E-01 | no |
| Leprel4      | 0.04  | 0.09  | 1.10  | 8.62E-01 | no |
| Ormdl2       | 9.36  | 8.30  | -0.17 | 8.62E-01 | no |
| Zfyve9       | 0.12  | 0.07  | -0.84 | 8.62E-01 | no |
| Ndufa7       | 40.90 | 36.48 | -0.16 | 8.63E-01 | no |
| Uap1         | 13.50 | 12.20 | -0.15 | 8.63E-01 | no |
| Rcor3        | 4.47  | 5.17  | 0.21  | 8.63E-01 | no |

|              |       |       |       |          |    |
|--------------|-------|-------|-------|----------|----|
| Itgb3bp      | 3.81  | 4.38  | 0.20  | 8.64E-01 | no |
| Faf2         | 20.49 | 18.97 | -0.11 | 8.64E-01 | no |
| 2010107E04Ri | 64.79 | 57.84 | -0.16 | 8.64E-01 | no |
| Abhd16b      | 0.08  | 0.04  | -0.99 | 8.64E-01 | no |
| Ift46        | 6.06  | 6.77  | 0.16  | 8.64E-01 | no |
| Cd164        | 60.58 | 56.30 | -0.11 | 8.64E-01 | no |
| Aftph        | 34.19 | 31.75 | -0.11 | 8.64E-01 | no |
| Naglu        | 6.79  | 7.62  | 0.17  | 8.64E-01 | no |
| Pilrb1       | 0.07  | 0.17  | 1.20  | 8.64E-01 | no |
| Hepacam      | 0.04  | 0.07  | 0.92  | 8.64E-01 | no |
| G630090E17Ri | 0.13  | 0.20  | 0.62  | 8.64E-01 | no |
| Tlr5         | 0.20  | 0.26  | 0.38  | 8.64E-01 | no |
| Gab3         | 0.98  | 1.19  | 0.28  | 8.64E-01 | no |
| Gpr65        | 1.84  | 2.18  | 0.24  | 8.64E-01 | no |
| Zfp846       | 5.23  | 5.92  | 0.18  | 8.64E-01 | no |
| Ttc35        | 15.49 | 17.35 | 0.16  | 8.64E-01 | no |
| Ankib1       | 12.08 | 13.06 | 0.11  | 8.64E-01 | no |
| Gpsm1        | 14.96 | 16.16 | 0.11  | 8.64E-01 | no |
| Cdc42ep3     | 40.42 | 43.67 | 0.11  | 8.64E-01 | no |
| Hif1a        | 23.31 | 25.13 | 0.11  | 8.64E-01 | no |
| Pogz         | 18.01 | 16.82 | -0.10 | 8.64E-01 | no |
| Rae1         | 26.95 | 24.69 | -0.13 | 8.64E-01 | no |
| Zfp653       | 14.82 | 13.45 | -0.14 | 8.64E-01 | no |
| Fam175a      | 11.14 | 10.00 | -0.16 | 8.64E-01 | no |
| Mus81        | 10.21 | 9.14  | -0.16 | 8.64E-01 | no |
| Isca2        | 24.56 | 21.94 | -0.16 | 8.64E-01 | no |
| Ndufa1       | 26.22 | 23.06 | -0.19 | 8.64E-01 | no |
| Limk1        | 3.01  | 2.62  | -0.20 | 8.64E-01 | no |
| Wdr31        | 2.10  | 1.75  | -0.26 | 8.64E-01 | no |
| Irak1bp1     | 2.09  | 1.73  | -0.27 | 8.64E-01 | no |
| Hoxa9        | 1.10  | 0.89  | -0.30 | 8.64E-01 | no |
| Trpa1        | 0.32  | 0.25  | -0.34 | 8.64E-01 | no |
| Mxra8        | 0.09  | 0.05  | -0.90 | 8.64E-01 | no |
| Sv2c         | 0.14  | 0.18  | 0.40  | 8.64E-01 | no |
| Fzd5         | 1.48  | 1.69  | 0.19  | 8.64E-01 | no |
| Rab19        | 6.00  | 5.18  | -0.21 | 8.64E-01 | no |
| Bag1         | 35.08 | 32.19 | -0.12 | 8.64E-01 | no |
| Kcna2        | 0.05  | 0.02  | -1.25 | 8.64E-01 | no |
| Kifc2        | 1.10  | 1.30  | 0.23  | 8.64E-01 | no |
| Cant1        | 22.01 | 23.62 | 0.10  | 8.64E-01 | no |
| Zdhhc25      | 0.06  | 0.15  | 1.21  | 8.65E-01 | no |
| Wdr86        | 0.24  | 0.32  | 0.43  | 8.65E-01 | no |

|              |       |       |       |          |    |
|--------------|-------|-------|-------|----------|----|
| Bbs2         | 1.98  | 2.30  | 0.22  | 8.65E-01 | no |
| Wdfy2        | 4.76  | 5.43  | 0.19  | 8.65E-01 | no |
| Cecr5        | 16.29 | 17.91 | 0.14  | 8.65E-01 | no |
| Ctdsp2       | 85.28 | 80.87 | -0.08 | 8.65E-01 | no |
| Fam120a      | 61.39 | 57.16 | -0.10 | 8.65E-01 | no |
| BC005537     | 73.35 | 68.27 | -0.10 | 8.65E-01 | no |
| Tbcc         | 11.04 | 9.87  | -0.16 | 8.65E-01 | no |
| Fam185a      | 6.94  | 6.19  | -0.16 | 8.65E-01 | no |
| 1700029J07Ri | 1.41  | 1.18  | -0.25 | 8.65E-01 | no |
| Ckb          | 0.40  | 0.30  | -0.41 | 8.65E-01 | no |
| 4732416N19Ri | 0.38  | 0.21  | -0.84 | 8.65E-01 | no |
| Tgfbrap1     | 10.41 | 9.58  | -0.12 | 8.65E-01 | no |
| Rdh1         | 0.02  | 0.05  | 1.21  | 8.65E-01 | no |
| Srcin1       | 0.04  | 0.06  | 0.53  | 8.65E-01 | no |
| Ceacam10     | 0.35  | 0.50  | 0.52  | 8.65E-01 | no |
| 5730494N06Ri | 14.34 | 15.96 | 0.15  | 8.65E-01 | no |
| Tomm34       | 30.48 | 32.95 | 0.11  | 8.65E-01 | no |
| Lass2        | 37.31 | 34.47 | -0.11 | 8.65E-01 | no |
| Mrpl11       | 8.05  | 7.22  | -0.16 | 8.65E-01 | no |
| Stk24        | 44.70 | 48.11 | 0.11  | 8.65E-01 | no |
| B430319G15Ri | 0.06  | 0.09  | 0.60  | 8.65E-01 | no |
| Rnf20        | 27.20 | 25.58 | -0.09 | 8.65E-01 | no |
| Gmfb         | 41.97 | 39.05 | -0.10 | 8.65E-01 | no |
| Fam149b      | 11.67 | 10.63 | -0.13 | 8.65E-01 | no |
| Fam125a      | 19.57 | 21.71 | 0.15  | 8.65E-01 | no |
| Twsg1        | 21.20 | 22.90 | 0.11  | 8.65E-01 | no |
| Pskh1        | 13.89 | 15.15 | 0.12  | 8.66E-01 | no |
| Alkbh4       | 6.36  | 5.58  | -0.19 | 8.66E-01 | no |
| Phrf1        | 26.40 | 24.57 | -0.10 | 8.66E-01 | no |
| Zfp583       | 1.71  | 2.00  | 0.23  | 8.66E-01 | no |
| Aifm2        | 0.38  | 0.51  | 0.44  | 8.66E-01 | no |
| Ap1ar        | 46.32 | 43.04 | -0.11 | 8.66E-01 | no |
| Gjc1         | 0.08  | 0.16  | 1.01  | 8.66E-01 | no |
| Tcf7l1       | 1.38  | 1.14  | -0.27 | 8.66E-01 | no |
| Lpcat3       | 18.90 | 20.61 | 0.12  | 8.66E-01 | no |
| Fcgr1        | 0.10  | 0.07  | -0.68 | 8.66E-01 | no |
| Aup1         | 40.08 | 43.40 | 0.11  | 8.66E-01 | no |
| Mov10        | 12.67 | 13.68 | 0.11  | 8.66E-01 | no |
| Wdr25        | 1.82  | 2.12  | 0.22  | 8.67E-01 | no |
| Fbf1         | 7.59  | 8.26  | 0.12  | 8.67E-01 | no |
| Fdps         | 14.82 | 13.23 | -0.16 | 8.67E-01 | no |
| Vps26b       | 8.30  | 7.63  | -0.12 | 8.67E-01 | no |

|               |       |       |       |          |    |
|---------------|-------|-------|-------|----------|----|
| Gnaq          | 12.44 | 11.47 | -0.12 | 8.67E-01 | no |
| B4galt4       | 4.63  | 4.05  | -0.19 | 8.67E-01 | no |
| Rab13         | 0.23  | 0.14  | -0.69 | 8.67E-01 | no |
| Scn5a         | 0.02  | 0.01  | -1.01 | 8.67E-01 | no |
| Trim69        | 0.18  | 0.27  | 0.53  | 8.67E-01 | no |
| Gpt           | 3.49  | 3.01  | -0.21 | 8.67E-01 | no |
| Tspan14       | 43.50 | 40.39 | -0.11 | 8.67E-01 | no |
| Zfp157        | 7.13  | 7.83  | 0.13  | 8.67E-01 | no |
| AI846148      | 9.28  | 10.21 | 0.14  | 8.67E-01 | no |
| Pat11         | 21.64 | 20.06 | -0.11 | 8.67E-01 | no |
| Prox1         | 0.04  | 0.02  | -1.23 | 8.67E-01 | no |
| Tssk1         | 0.09  | 0.15  | 0.74  | 8.68E-01 | no |
| Tmem106b      | 21.90 | 23.58 | 0.11  | 8.68E-01 | no |
| 2410127L17Ril | 27.07 | 24.88 | -0.12 | 8.68E-01 | no |
| 9430016H08Ri  | 11.70 | 10.37 | -0.17 | 8.68E-01 | no |
| Zfp553        | 13.50 | 12.32 | -0.13 | 8.68E-01 | no |
| Gm10638       | 0.34  | 0.25  | -0.49 | 8.68E-01 | no |
| Srrm2         | 86.04 | 79.56 | -0.11 | 8.68E-01 | no |
| Cpeb4         | 5.48  | 6.22  | 0.18  | 8.68E-01 | no |
| Homez         | 3.47  | 3.87  | 0.16  | 8.68E-01 | no |
| Mrpl13        | 30.74 | 27.66 | -0.15 | 8.68E-01 | no |
| A630089N07R   | 2.58  | 2.21  | -0.22 | 8.68E-01 | no |
| Itfg1         | 12.02 | 13.17 | 0.13  | 8.68E-01 | no |
| Map2k6        | 6.63  | 5.84  | -0.18 | 8.68E-01 | no |
| Trim56        | 15.80 | 17.11 | 0.11  | 8.68E-01 | no |
| Rbm47         | 1.16  | 1.37  | 0.23  | 8.69E-01 | no |
| Fam78a        | 18.47 | 19.96 | 0.11  | 8.69E-01 | no |
| Dhx34         | 11.99 | 11.01 | -0.12 | 8.69E-01 | no |
| Npc1l1        | 0.02  | 0.04  | 1.19  | 8.69E-01 | no |
| Kctd6         | 2.75  | 3.21  | 0.22  | 8.69E-01 | no |
| Cyb5          | 19.23 | 21.58 | 0.17  | 8.69E-01 | no |
| BC004004      | 14.28 | 15.61 | 0.13  | 8.69E-01 | no |
| Npat          | 13.53 | 12.55 | -0.11 | 8.69E-01 | no |
| Hras1         | 10.07 | 9.09  | -0.15 | 8.69E-01 | no |
| Ndufa3        | 40.03 | 35.37 | -0.18 | 8.69E-01 | no |
| Gm9790,Higd1  | 26.02 | 22.80 | -0.19 | 8.69E-01 | no |
| Cebpa         | 0.54  | 0.44  | -0.30 | 8.69E-01 | no |
| Col23a1       | 0.12  | 0.09  | -0.39 | 8.69E-01 | no |
| Ick           | 2.96  | 3.30  | 0.16  | 8.69E-01 | no |
| Zfp58         | 6.21  | 5.47  | -0.18 | 8.69E-01 | no |
| Nt5e          | 0.02  | 0.05  | 1.18  | 8.69E-01 | no |
| Tpst2         | 6.86  | 7.75  | 0.18  | 8.69E-01 | no |

|               |        |        |       |          |    |
|---------------|--------|--------|-------|----------|----|
| Aacs          | 8.70   | 9.57   | 0.14  | 8.69E-01 | no |
| Trim41        | 16.75  | 18.12  | 0.11  | 8.69E-01 | no |
| Stk25         | 21.33  | 23.04  | 0.11  | 8.69E-01 | no |
| Rpl36al       | 255.09 | 237.58 | -0.10 | 8.69E-01 | no |
| Rictor        | 14.32  | 13.31  | -0.11 | 8.69E-01 | no |
| Gba2          | 16.48  | 15.21  | -0.12 | 8.69E-01 | no |
| Fam32a        | 31.59  | 29.14  | -0.12 | 8.69E-01 | no |
| Smyd5         | 16.37  | 15.00  | -0.13 | 8.69E-01 | no |
| Mrps15        | 25.32  | 22.82  | -0.15 | 8.69E-01 | no |
| Gm6222        | 35.69  | 32.14  | -0.15 | 8.69E-01 | no |
| Commd2        | 8.87   | 7.96   | -0.16 | 8.69E-01 | no |
| 2410004B18Ri  | 12.36  | 10.91  | -0.18 | 8.69E-01 | no |
| Ripk2         | 4.86   | 4.24   | -0.20 | 8.69E-01 | no |
| Eid2b         | 2.95   | 2.56   | -0.21 | 8.69E-01 | no |
| Lmtk3         | 0.05   | 0.03   | -0.65 | 8.69E-01 | no |
| Gata1         | 0.16   | 0.10   | -0.67 | 8.69E-01 | no |
| Smcr7         | 5.89   | 6.62   | 0.17  | 8.69E-01 | no |
| 4921533I20Rik | 1.58   | 1.29   | -0.29 | 8.69E-01 | no |
| Gss           | 5.29   | 6.01   | 0.18  | 8.69E-01 | no |
| Atpif1        | 41.48  | 37.36  | -0.15 | 8.69E-01 | no |
| Igfn1         | 0.05   | 0.04   | -0.45 | 8.69E-01 | no |
| Gm5779        | 0.36   | 0.23   | -0.65 | 8.69E-01 | no |
| BC051019      | 0.08   | 0.03   | -1.24 | 8.69E-01 | no |
| Abhd12        | 12.64  | 13.96  | 0.14  | 8.69E-01 | no |
| Igf2bp2       | 0.36   | 0.28   | -0.32 | 8.69E-01 | no |
| Naip1         | 0.24   | 0.19   | -0.33 | 8.69E-01 | no |
| Adam8         | 0.89   | 1.06   | 0.24  | 8.70E-01 | no |
| Klb           | 0.02   | 0.04   | 1.09  | 8.70E-01 | no |
| Clp1          | 21.97  | 20.07  | -0.13 | 8.70E-01 | no |
| Zfp563        | 2.07   | 2.35   | 0.18  | 8.70E-01 | no |
| Cox16         | 8.78   | 7.77   | -0.18 | 8.70E-01 | no |
| Gpr124        | 0.20   | 0.16   | -0.32 | 8.70E-01 | no |
| Chmp4c        | 0.04   | 0.08   | 1.09  | 8.70E-01 | no |
| Tshz3         | 0.01   | 0.03   | 1.09  | 8.70E-01 | no |
| Dear1         | 0.21   | 0.41   | 0.96  | 8.70E-01 | no |
| Slc17a7       | 0.04   | 0.07   | 0.83  | 8.70E-01 | no |
| Slc35d3       | 0.10   | 0.15   | 0.60  | 8.70E-01 | no |
| A930003A15Ri  | 0.30   | 0.46   | 0.59  | 8.70E-01 | no |
| Tcea2         | 1.29   | 1.56   | 0.28  | 8.70E-01 | no |
| Zfp235        | 2.40   | 2.74   | 0.19  | 8.70E-01 | no |
| Acrbp         | 12.07  | 13.42  | 0.15  | 8.70E-01 | no |
| H2-T24        | 11.38  | 12.58  | 0.15  | 8.70E-01 | no |

|              |       |       |       |          |    |
|--------------|-------|-------|-------|----------|----|
| Rnf19b       | 14.51 | 15.85 | 0.13  | 8.70E-01 | no |
| Zfp275       | 8.10  | 8.78  | 0.12  | 8.70E-01 | no |
| Sharpin      | 31.93 | 34.58 | 0.11  | 8.70E-01 | no |
| Traf4        | 20.09 | 21.73 | 0.11  | 8.70E-01 | no |
| Tcf20        | 24.22 | 22.70 | -0.09 | 8.70E-01 | no |
| Pan2         | 25.44 | 23.68 | -0.10 | 8.70E-01 | no |
| Sfswap       | 27.16 | 25.26 | -0.10 | 8.70E-01 | no |
| Map3k5       | 15.92 | 14.76 | -0.11 | 8.70E-01 | no |
| Gm4902       | 3.11  | 2.64  | -0.24 | 8.70E-01 | no |
| Gm5148       | 2.97  | 2.51  | -0.24 | 8.70E-01 | no |
| Efhd1        | 1.82  | 1.52  | -0.26 | 8.70E-01 | no |
| Bex4         | 1.32  | 1.05  | -0.33 | 8.70E-01 | no |
| Adc          | 0.20  | 0.14  | -0.54 | 8.70E-01 | no |
| 4933436C20Ri | 0.32  | 0.22  | -0.54 | 8.70E-01 | no |
| E130203B14Ri | 0.02  | 0.05  | 1.09  | 8.71E-01 | no |
| Hist1h3d     | 0.09  | 0.27  | 1.64  | 8.71E-01 | no |
| Zfp781       | 3.87  | 3.49  | -0.15 | 8.71E-01 | no |
| Psme2        | 45.16 | 48.93 | 0.12  | 8.71E-01 | no |
| Zfp282       | 12.48 | 13.47 | 0.11  | 8.71E-01 | no |
| Gm14492      | 3.50  | 4.01  | 0.20  | 8.71E-01 | no |
| Zfp60        | 9.55  | 8.70  | -0.13 | 8.71E-01 | no |
| Gmppa        | 12.36 | 13.75 | 0.15  | 8.72E-01 | no |
| I7Rn6        | 24.15 | 21.74 | -0.15 | 8.72E-01 | no |
| Sec61a2      | 10.49 | 11.64 | 0.15  | 8.72E-01 | no |
| Gsk3b        | 20.58 | 19.19 | -0.10 | 8.72E-01 | no |
| Uqcc         | 9.95  | 9.01  | -0.14 | 8.72E-01 | no |
| Cdk5rap1     | 8.20  | 7.31  | -0.17 | 8.72E-01 | no |
| Cdipt        | 32.66 | 30.32 | -0.11 | 8.72E-01 | no |
| Xpnpep3      | 6.41  | 5.74  | -0.16 | 8.72E-01 | no |
| Mxra7        | 0.08  | 0.04  | -1.23 | 8.72E-01 | no |
| Zfp239       | 2.68  | 2.32  | -0.20 | 8.72E-01 | no |
| D930014E17Ri | 13.80 | 12.24 | -0.17 | 8.72E-01 | no |
| Sec61a1      | 40.20 | 37.45 | -0.10 | 8.72E-01 | no |
| Rho          | 0.17  | 0.13  | -0.44 | 8.72E-01 | no |
| Cacna1c      | 0.02  | 0.01  | -0.86 | 8.72E-01 | no |
| Nsdhl        | 7.61  | 6.77  | -0.17 | 8.72E-01 | no |
| Gm1995       | 0.93  | 0.79  | -0.23 | 8.72E-01 | no |
| Mamdc4       | 2.43  | 2.14  | -0.19 | 8.73E-01 | no |
| Vars2        | 10.06 | 9.25  | -0.12 | 8.73E-01 | no |
| Gm5177       | 0.01  | 0.03  | 1.59  | 8.73E-01 | no |
| Ankfy1       | 27.13 | 29.07 | 0.10  | 8.73E-01 | no |
| Xab2         | 28.25 | 26.22 | -0.11 | 8.73E-01 | no |

|               |       |       |       |          |    |
|---------------|-------|-------|-------|----------|----|
| A830093I24Ril | 0.41  | 0.32  | -0.33 | 8.73E-01 | no |
| Cd300ld       | 0.24  | 0.18  | -0.44 | 8.73E-01 | no |
| Irf9          | 28.58 | 30.52 | 0.09  | 8.73E-01 | no |
| Myh9          | 63.76 | 59.31 | -0.10 | 8.73E-01 | no |
| Accn2         | 1.07  | 1.24  | 0.22  | 8.73E-01 | no |
| Ubqln2        | 21.10 | 19.54 | -0.11 | 8.73E-01 | no |
| Nek7          | 22.86 | 21.16 | -0.11 | 8.73E-01 | no |
| Pou5f2        | 0.14  | 0.08  | -0.86 | 8.73E-01 | no |
| Egf           | 0.84  | 0.71  | -0.24 | 8.73E-01 | no |
| Dcun1d5       | 41.56 | 38.24 | -0.12 | 8.73E-01 | no |
| Utp18         | 15.72 | 14.38 | -0.13 | 8.73E-01 | no |
| Efhc1         | 0.17  | 0.23  | 0.46  | 8.74E-01 | no |
| Ddt           | 26.12 | 29.24 | 0.16  | 8.74E-01 | no |
| Prrc2c        | 55.03 | 51.18 | -0.10 | 8.74E-01 | no |
| Manf          | 18.75 | 17.17 | -0.13 | 8.74E-01 | no |
| Ccdc152       | 0.09  | 0.19  | 1.07  | 8.74E-01 | no |
| Lefty1        | 0.16  | 0.23  | 0.52  | 8.74E-01 | no |
| Hexb          | 18.61 | 20.38 | 0.13  | 8.74E-01 | no |
| Vps13b        | 17.72 | 16.55 | -0.10 | 8.74E-01 | no |
| 2700086A05Ri  | 0.50  | 0.35  | -0.53 | 8.74E-01 | no |
| Lrrc41        | 19.38 | 17.89 | -0.12 | 8.74E-01 | no |
| Folr2         | 0.16  | 0.09  | -0.85 | 8.74E-01 | no |
| Cd320         | 3.86  | 4.41  | 0.19  | 8.74E-01 | no |
| Ankrd13d      | 14.81 | 16.18 | 0.13  | 8.74E-01 | no |
| Cdk6          | 42.55 | 45.67 | 0.10  | 8.74E-01 | no |
| Enox2         | 8.68  | 7.85  | -0.14 | 8.74E-01 | no |
| Rassf1        | 13.80 | 12.46 | -0.15 | 8.74E-01 | no |
| Zbtb34        | 9.51  | 10.29 | 0.11  | 8.74E-01 | no |
| Vat1          | 4.52  | 4.00  | -0.18 | 8.74E-01 | no |
| Gng8          | 0.10  | 0.20  | 1.03  | 8.74E-01 | no |
| Stk19         | 15.74 | 17.51 | 0.15  | 8.74E-01 | no |
| 1110005A03Ri  | 24.67 | 27.20 | 0.14  | 8.74E-01 | no |
| Napa          | 24.88 | 26.87 | 0.11  | 8.74E-01 | no |
| 4933427E11Ri  | 0.22  | 0.32  | 0.51  | 8.74E-01 | no |
| Atg2b         | 9.37  | 10.06 | 0.10  | 8.74E-01 | no |
| Edc4          | 24.51 | 22.86 | -0.10 | 8.74E-01 | no |
| Ndor1         | 20.39 | 18.98 | -0.10 | 8.74E-01 | no |
| 2610005L07Ril | 7.48  | 6.80  | -0.14 | 8.74E-01 | no |
| Gm13034       | 4.09  | 3.51  | -0.22 | 8.74E-01 | no |
| Atp6v1g2      | 2.92  | 2.49  | -0.23 | 8.74E-01 | no |
| Adamtsl4      | 0.67  | 0.56  | -0.25 | 8.74E-01 | no |
| Serpinb10-ps  | 0.12  | 0.08  | -0.61 | 8.74E-01 | no |



|              |        |        |       |          |    |
|--------------|--------|--------|-------|----------|----|
| Fkbp8        | 80.50  | 76.21  | -0.08 | 8.74E-01 | no |
| Zfp300       | 0.44   | 0.53   | 0.28  | 8.75E-01 | no |
| Timm8a2      | 0.08   | 0.18   | 1.15  | 8.75E-01 | no |
| Mycn         | 0.86   | 1.02   | 0.25  | 8.75E-01 | no |
| Hyi          | 3.38   | 3.98   | 0.24  | 8.75E-01 | no |
| Mknk2        | 84.93  | 79.38  | -0.10 | 8.75E-01 | no |
| Ints1        | 36.42  | 34.04  | -0.10 | 8.75E-01 | no |
| Cox4i1       | 95.58  | 88.60  | -0.11 | 8.75E-01 | no |
| Sdhc         | 40.08  | 36.86  | -0.12 | 8.75E-01 | no |
| Pole4        | 30.07  | 27.63  | -0.12 | 8.75E-01 | no |
| Amot         | 0.99   | 0.85   | -0.21 | 8.75E-01 | no |
| Amn          | 0.09   | 0.04   | -1.18 | 8.75E-01 | no |
| Car5a        | 0.08   | 0.03   | -1.56 | 8.75E-01 | no |
| Gtf2e1       | 12.09  | 11.04  | -0.13 | 8.75E-01 | no |
| Mobk11b      | 49.97  | 46.34  | -0.11 | 8.75E-01 | no |
| Papln        | 0.03   | 0.02   | -1.17 | 8.75E-01 | no |
| Arl13a       | 0.05   | 0.11   | 1.14  | 8.75E-01 | no |
| Pex26        | 3.20   | 2.84   | -0.17 | 8.76E-01 | no |
| Klf7         | 2.63   | 2.23   | -0.24 | 8.76E-01 | no |
| Nos2         | 0.04   | 0.02   | -1.17 | 8.76E-01 | no |
| Ulk1         | 13.67  | 14.71  | 0.11  | 8.76E-01 | no |
| Gon4l        | 20.33  | 19.00  | -0.10 | 8.76E-01 | no |
| Nsg1         | 0.60   | 0.73   | 0.30  | 8.76E-01 | no |
| Tut1         | 17.39  | 16.04  | -0.12 | 8.76E-01 | no |
| D19Erttd386e | 10.22  | 9.37   | -0.12 | 8.76E-01 | no |
| 4930515G01Ri | 2.08   | 1.75   | -0.25 | 8.76E-01 | no |
| Ip6k2        | 18.75  | 20.46  | 0.13  | 8.77E-01 | no |
| AW554918     | 6.02   | 5.48   | -0.14 | 8.77E-01 | no |
| C330018D20Ri | 6.45   | 5.72   | -0.17 | 8.77E-01 | no |
| Rbm39        | 72.42  | 67.73  | -0.10 | 8.77E-01 | no |
| 9430070013Ri | 0.04   | 0.09   | 1.14  | 8.77E-01 | no |
| Arhgdib      | 135.12 | 126.21 | -0.10 | 8.77E-01 | no |
| Get4         | 30.86  | 28.71  | -0.10 | 8.77E-01 | no |
| Aip          | 28.65  | 26.33  | -0.12 | 8.77E-01 | no |
| Trp53bp2     | 7.27   | 7.94   | 0.13  | 8.77E-01 | no |
| Gga3         | 24.57  | 22.88  | -0.10 | 8.77E-01 | no |
| Alg10b       | 21.75  | 20.18  | -0.11 | 8.77E-01 | no |
| Apol7c       | 0.01   | 0.06   | 2.55  | 8.77E-01 | no |
| Tmem30c      | 0.14   | 0.23   | 0.71  | 8.77E-01 | no |
| Stab2        | 0.03   | 0.04   | 0.60  | 8.77E-01 | no |
| Tmem115      | 9.47   | 10.47  | 0.14  | 8.77E-01 | no |
| Jagn1        | 18.90  | 16.99  | -0.15 | 8.77E-01 | no |

|                |        |        |       |          |    |
|----------------|--------|--------|-------|----------|----|
| Lrch4,Lrch4-sa | 28.85  | 26.47  | -0.12 | 8.78E-01 | no |
| Kcnk5          | 4.69   | 5.23   | 0.16  | 8.78E-01 | no |
| Golgb1         | 13.63  | 14.58  | 0.10  | 8.78E-01 | no |
| Psd2           | 0.03   | 0.01   | -1.18 | 8.78E-01 | no |
| Synj1          | 8.29   | 8.91   | 0.11  | 8.78E-01 | no |
| Pbx2           | 21.12  | 19.56  | -0.11 | 8.78E-01 | no |
| Ubb            | 212.46 | 198.72 | -0.10 | 8.78E-01 | no |
| Pnpt1          | 16.48  | 15.12  | -0.12 | 8.78E-01 | no |
| Timm9          | 19.70  | 17.79  | -0.15 | 8.78E-01 | no |
| 2310007A19Ri   | 0.25   | 0.42   | 0.74  | 8.78E-01 | no |
| LOC100038947   | 0.12   | 0.19   | 0.71  | 8.78E-01 | no |
| S100a1         | 2.72   | 3.25   | 0.26  | 8.78E-01 | no |
| Hoxb4          | 2.22   | 2.55   | 0.20  | 8.78E-01 | no |
| Dyrk3          | 5.49   | 6.19   | 0.17  | 8.78E-01 | no |
| Vprbp          | 21.50  | 20.06  | -0.10 | 8.78E-01 | no |
| Smarcad1       | 16.10  | 14.95  | -0.11 | 8.78E-01 | no |
| Brf1           | 23.17  | 21.51  | -0.11 | 8.78E-01 | no |
| Usf1           | 30.17  | 27.94  | -0.11 | 8.78E-01 | no |
| 1700007I08Rik  | 0.55   | 0.44   | -0.34 | 8.78E-01 | no |
| Ulk4           | 0.13   | 0.10   | -0.42 | 8.78E-01 | no |
| Gm10190        | 0.78   | 0.35   | -1.17 | 8.78E-01 | no |
| Itga1          | 0.17   | 0.13   | -0.33 | 8.79E-01 | no |
| Sphk2          | 16.15  | 17.25  | 0.10  | 8.79E-01 | no |
| Mrps36         | 23.42  | 21.00  | -0.16 | 8.79E-01 | no |
| Mta2           | 69.88  | 65.40  | -0.10 | 8.79E-01 | no |
| Ero1lb         | 16.40  | 17.69  | 0.11  | 8.79E-01 | no |
| Tmem104        | 3.99   | 3.58   | -0.16 | 8.79E-01 | no |
| Dll3           | 0.13   | 0.08   | -0.63 | 8.79E-01 | no |
| Ehmt2          | 47.96  | 45.57  | -0.07 | 8.79E-01 | no |
| Lime1          | 19.85  | 21.55  | 0.12  | 8.79E-01 | no |
| Zfp955a        | 10.27  | 9.38   | -0.13 | 8.79E-01 | no |
| Ercc8          | 8.23   | 7.37   | -0.16 | 8.80E-01 | no |
| Stap2          | 0.41   | 0.32   | -0.39 | 8.80E-01 | no |
| Slc4a5         | 0.02   | 0.04   | 1.00  | 8.80E-01 | no |
| Fermt1         | 0.03   | 0.05   | 0.66  | 8.80E-01 | no |
| Gm1045         | 0.24   | 0.37   | 0.66  | 8.80E-01 | no |
| Mapk8ip1       | 0.09   | 0.13   | 0.49  | 8.80E-01 | no |
| Slc17a4        | 0.15   | 0.21   | 0.48  | 8.80E-01 | no |
| Klf12          | 0.16   | 0.20   | 0.33  | 8.80E-01 | no |
| Daf2           | 1.45   | 1.75   | 0.27  | 8.80E-01 | no |
| 1520402A15Ri   | 1.09   | 1.31   | 0.26  | 8.80E-01 | no |
| 4930578N16Ri   | 2.04   | 2.37   | 0.22  | 8.80E-01 | no |

|               |        |        |       |          |    |
|---------------|--------|--------|-------|----------|----|
| Ifitm2        | 19.97  | 22.43  | 0.17  | 8.80E-01 | no |
| 2010305A19Ri  | 5.47   | 6.11   | 0.16  | 8.80E-01 | no |
| Dstyk         | 4.19   | 4.61   | 0.14  | 8.80E-01 | no |
| Nlk           | 8.47   | 9.24   | 0.13  | 8.80E-01 | no |
| Zdhhc18       | 25.28  | 27.18  | 0.10  | 8.80E-01 | no |
| 2510039O18Ri  | 26.00  | 27.92  | 0.10  | 8.80E-01 | no |
| Fbxo11        | 26.21  | 28.09  | 0.10  | 8.80E-01 | no |
| Map4k1        | 34.85  | 37.34  | 0.10  | 8.80E-01 | no |
| Nfat5         | 22.00  | 23.31  | 0.08  | 8.80E-01 | no |
| Polr1d        | 110.40 | 116.95 | 0.08  | 8.80E-01 | no |
| Nufip2        | 23.37  | 21.87  | -0.10 | 8.80E-01 | no |
| Rrp1          | 56.64  | 52.97  | -0.10 | 8.80E-01 | no |
| Rad54l2       | 12.69  | 11.85  | -0.10 | 8.80E-01 | no |
| Lig4          | 29.81  | 27.84  | -0.10 | 8.80E-01 | no |
| Pigm          | 17.32  | 16.16  | -0.10 | 8.80E-01 | no |
| Gfm2          | 15.36  | 14.27  | -0.11 | 8.80E-01 | no |
| Golga3        | 12.14  | 11.27  | -0.11 | 8.80E-01 | no |
| Map2k1        | 19.47  | 17.97  | -0.12 | 8.80E-01 | no |
| Gps2          | 31.98  | 29.45  | -0.12 | 8.80E-01 | no |
| Secisbp2      | 12.51  | 11.49  | -0.12 | 8.80E-01 | no |
| Mcm9          | 9.15   | 8.39   | -0.12 | 8.80E-01 | no |
| Jmjd6         | 19.34  | 17.72  | -0.13 | 8.80E-01 | no |
| Ccdc137       | 11.89  | 10.88  | -0.13 | 8.80E-01 | no |
| Azi1          | 6.80   | 6.19   | -0.13 | 8.80E-01 | no |
| Creld2        | 17.26  | 15.68  | -0.14 | 8.80E-01 | no |
| Nrip1         | 5.57   | 5.06   | -0.14 | 8.80E-01 | no |
| 2810428I15Rik | 19.59  | 17.46  | -0.17 | 8.80E-01 | no |
| 2010012O05Ri  | 7.41   | 6.59   | -0.17 | 8.80E-01 | no |
| Snrpc         | 15.04  | 13.33  | -0.17 | 8.80E-01 | no |
| Mtap9         | 1.80   | 1.59   | -0.18 | 8.80E-01 | no |
| Slc39a8       | 2.60   | 2.29   | -0.19 | 8.80E-01 | no |
| 2010109I03Rik | 1.83   | 1.56   | -0.23 | 8.80E-01 | no |
| Mcoln3        | 0.63   | 0.51   | -0.31 | 8.80E-01 | no |
| Stmn1-rs1     | 0.58   | 0.44   | -0.39 | 8.80E-01 | no |
| Stk39         | 0.10   | 0.07   | -0.57 | 8.80E-01 | no |
| Sgtb          | 0.13   | 0.08   | -0.61 | 8.80E-01 | no |
| Tspo2         | 0.17   | 0.08   | -1.18 | 8.80E-01 | no |
| Man2a2        | 30.93  | 28.91  | -0.10 | 8.80E-01 | no |
| Alad          | 14.40  | 12.99  | -0.15 | 8.80E-01 | no |
| Mrgpra2b      | 0.03   | 0.12   | 1.93  | 8.80E-01 | no |
| Pdgfc         | 0.04   | 0.06   | 0.72  | 8.80E-01 | no |
| Synpo         | 0.03   | 0.01   | -1.15 | 8.80E-01 | no |

|              |       |       |       |          |    |
|--------------|-------|-------|-------|----------|----|
| Hmox2        | 38.41 | 35.38 | -0.12 | 8.80E-01 | no |
| Mrgpra2a     | 0.03  | 0.13  | 1.93  | 8.80E-01 | no |
| Crnk11       | 19.52 | 18.09 | -0.11 | 8.80E-01 | no |
| Atxn2        | 10.88 | 10.05 | -0.11 | 8.80E-01 | no |
| Dnttip1      | 15.43 | 13.94 | -0.15 | 8.80E-01 | no |
| Gm9992       | 0.04  | 0.08  | 1.14  | 8.80E-01 | no |
| Spata5       | 10.42 | 9.53  | -0.13 | 8.80E-01 | no |
| Slc22a15     | 1.10  | 0.96  | -0.20 | 8.80E-01 | no |
| Chst3        | 75.74 | 70.77 | -0.10 | 8.81E-01 | no |
| 1700019N12Ri | 0.09  | 0.18  | 0.97  | 8.81E-01 | no |
| Tcfcp2       | 2.56  | 2.90  | 0.18  | 8.81E-01 | no |
| Drosha       | 16.41 | 15.32 | -0.10 | 8.81E-01 | no |
| Hecw2        | 0.03  | 0.02  | -0.64 | 8.81E-01 | no |
| Spopl        | 8.14  | 8.95  | 0.14  | 8.81E-01 | no |
| Itgb4        | 0.62  | 1.25  | 1.00  | 8.82E-01 | no |
| Sparc        | 0.04  | 0.07  | 0.99  | 8.82E-01 | no |
| Pcsk9        | 0.09  | 0.13  | 0.46  | 8.82E-01 | no |
| Ggn          | 0.53  | 0.67  | 0.35  | 8.82E-01 | no |
| Otud3        | 4.28  | 4.86  | 0.18  | 8.82E-01 | no |
| Lss          | 4.15  | 4.65  | 0.16  | 8.82E-01 | no |
| Tmem199      | 10.53 | 11.76 | 0.16  | 8.82E-01 | no |
| Gnb4         | 6.85  | 7.62  | 0.15  | 8.82E-01 | no |
| Tmem201      | 17.03 | 16.00 | -0.09 | 8.82E-01 | no |
| Pes1         | 26.97 | 25.14 | -0.10 | 8.82E-01 | no |
| Nob1         | 20.49 | 18.81 | -0.12 | 8.82E-01 | no |
| Ndufa11      | 9.02  | 8.19  | -0.14 | 8.82E-01 | no |
| Ccdc56       | 31.70 | 28.72 | -0.14 | 8.82E-01 | no |
| Snrnp27      | 23.89 | 21.52 | -0.15 | 8.82E-01 | no |
| Cox7c        | 39.13 | 35.08 | -0.16 | 8.82E-01 | no |
| Ndufaf1      | 11.69 | 10.46 | -0.16 | 8.82E-01 | no |
| Rbp2         | 0.21  | 0.10  | -1.13 | 8.82E-01 | no |
| Npr2         | 0.16  | 0.21  | 0.37  | 8.82E-01 | no |
| Rab6b        | 3.49  | 3.90  | 0.16  | 8.82E-01 | no |
| Mthfsd       | 10.58 | 11.59 | 0.13  | 8.82E-01 | no |
| Hspa13       | 9.82  | 10.68 | 0.12  | 8.82E-01 | no |
| Zfp664       | 31.10 | 29.08 | -0.10 | 8.82E-01 | no |
| Wdr85        | 6.78  | 6.10  | -0.15 | 8.82E-01 | no |
| Sco1         | 4.36  | 3.91  | -0.16 | 8.82E-01 | no |
| Ctnnbip1     | 3.90  | 3.46  | -0.17 | 8.82E-01 | no |
| Snx2         | 77.33 | 72.40 | -0.10 | 8.82E-01 | no |
| F2rl1        | 0.12  | 0.08  | -0.57 | 8.82E-01 | no |
| Dhcr24       | 11.24 | 12.16 | 0.11  | 8.82E-01 | no |

|               |       |       |       |          |    |
|---------------|-------|-------|-------|----------|----|
| Ncdn          | 14.29 | 13.24 | -0.11 | 8.82E-01 | no |
| Ankrd13b      | 3.10  | 3.49  | 0.17  | 8.82E-01 | no |
| Agap3         | 11.21 | 12.15 | 0.12  | 8.82E-01 | no |
| Itgal         | 11.35 | 12.28 | 0.11  | 8.82E-01 | no |
| Snx31         | 0.05  | 0.08  | 0.78  | 8.82E-01 | no |
| Ctu1          | 6.07  | 6.77  | 0.16  | 8.82E-01 | no |
| Psen2         | 13.99 | 15.27 | 0.13  | 8.82E-01 | no |
| Zcchc24       | 13.61 | 14.69 | 0.11  | 8.82E-01 | no |
| Acp6          | 41.53 | 38.66 | -0.10 | 8.82E-01 | no |
| Cdc14a        | 11.02 | 10.20 | -0.11 | 8.82E-01 | no |
| Slc29a2       | 1.85  | 1.60  | -0.21 | 8.82E-01 | no |
| Igsf6         | 1.84  | 1.58  | -0.22 | 8.82E-01 | no |
| Kcnab3        | 0.19  | 0.14  | -0.45 | 8.82E-01 | no |
| Wdr83         | 18.77 | 17.03 | -0.14 | 8.82E-01 | no |
| Gpr62         | 0.02  | 0.06  | 1.37  | 8.82E-01 | no |
| Nek11         | 0.03  | 0.05  | 1.02  | 8.82E-01 | no |
| Gm11428       | 0.42  | 0.66  | 0.66  | 8.82E-01 | no |
| Hspb9         | 0.39  | 0.54  | 0.49  | 8.82E-01 | no |
| Pdcl3         | 12.90 | 14.24 | 0.14  | 8.82E-01 | no |
| Fgfr1op2      | 47.27 | 44.24 | -0.10 | 8.82E-01 | no |
| Cxhc5         | 48.54 | 45.38 | -0.10 | 8.82E-01 | no |
| Rbm22         | 36.13 | 33.67 | -0.10 | 8.82E-01 | no |
| Pgrmc1        | 29.80 | 27.57 | -0.11 | 8.82E-01 | no |
| Gnl2          | 19.75 | 18.25 | -0.11 | 8.82E-01 | no |
| Myst1         | 15.32 | 13.91 | -0.14 | 8.82E-01 | no |
| Trmu          | 7.14  | 6.33  | -0.17 | 8.82E-01 | no |
| Rundc3a       | 0.61  | 0.50  | -0.28 | 8.82E-01 | no |
| E130304I02Rik | 0.28  | 0.16  | -0.78 | 8.82E-01 | no |
| Gpr34         | 0.14  | 0.08  | -0.80 | 8.82E-01 | no |
| Kcnmb3        | 0.20  | 0.11  | -0.88 | 8.82E-01 | no |
| Prpf39        | 26.92 | 28.83 | 0.10  | 8.82E-01 | no |
| Clec3b        | 0.29  | 0.41  | 0.47  | 8.82E-01 | no |
| Stxbp5        | 3.86  | 4.22  | 0.13  | 8.82E-01 | no |
| Akt3          | 23.31 | 21.78 | -0.10 | 8.82E-01 | no |
| Tex10         | 20.36 | 18.88 | -0.11 | 8.82E-01 | no |
| Fam103a1      | 36.34 | 33.48 | -0.12 | 8.82E-01 | no |
| 6430704M03R   | 0.06  | 0.03  | -0.84 | 8.82E-01 | no |
| Hipk4         | 0.15  | 0.20  | 0.41  | 8.82E-01 | no |
| Vti1b         | 19.63 | 21.54 | 0.13  | 8.82E-01 | no |
| Pip5k1a       | 13.96 | 12.81 | -0.12 | 8.82E-01 | no |
| Cyp2u1        | 0.12  | 0.17  | 0.48  | 8.82E-01 | no |
| Angel1        | 1.22  | 1.41  | 0.20  | 8.82E-01 | no |

|               |       |       |       |          |    |
|---------------|-------|-------|-------|----------|----|
| Gm10416       | 2.46  | 2.97  | 0.28  | 8.82E-01 | no |
| Gm4907        | 1.29  | 1.53  | 0.25  | 8.82E-01 | no |
| Cklf          | 12.85 | 14.48 | 0.17  | 8.82E-01 | no |
| 1300018J18Ril | 5.87  | 6.54  | 0.16  | 8.82E-01 | no |
| Zfp523        | 6.14  | 6.80  | 0.15  | 8.82E-01 | no |
| Igf1r         | 3.93  | 4.26  | 0.12  | 8.82E-01 | no |
| Aplp2         | 15.61 | 16.73 | 0.10  | 8.82E-01 | no |
| Otud5         | 36.65 | 39.20 | 0.10  | 8.82E-01 | no |
| Vps36         | 29.38 | 27.01 | -0.12 | 8.82E-01 | no |
| 2810408M09R   | 12.36 | 11.23 | -0.14 | 8.82E-01 | no |
| Ndrp1         | 4.35  | 3.86  | -0.17 | 8.82E-01 | no |
| Efr3b         | 0.81  | 0.70  | -0.21 | 8.82E-01 | no |
| Phf16         | 10.29 | 9.35  | -0.14 | 8.83E-01 | no |
| Chmp5         | 21.04 | 19.16 | -0.14 | 8.83E-01 | no |
| Tmem63a       | 8.26  | 9.05  | 0.13  | 8.83E-01 | no |
| Golga5        | 18.27 | 19.58 | 0.10  | 8.83E-01 | no |
| Zfp646        | 25.38 | 23.80 | -0.09 | 8.83E-01 | no |
| Clca1         | 0.05  | 0.02  | -0.90 | 8.83E-01 | no |
| Shank1        | 0.03  | 0.02  | -0.64 | 8.83E-01 | no |
| Alox12        | 0.04  | 0.07  | 0.77  | 8.83E-01 | no |
| Zzz3          | 14.50 | 15.38 | 0.09  | 8.83E-01 | no |
| Med23         | 16.18 | 15.13 | -0.10 | 8.83E-01 | no |
| Dlg1          | 20.71 | 22.17 | 0.10  | 8.83E-01 | no |
| Kdm1b         | 14.17 | 13.16 | -0.11 | 8.83E-01 | no |
| Sh3bp5l       | 14.48 | 13.44 | -0.11 | 8.83E-01 | no |
| F2r           | 0.25  | 0.32  | 0.34  | 8.83E-01 | no |
| Nol6          | 19.71 | 18.42 | -0.10 | 8.83E-01 | no |
| Mtmt1         | 16.71 | 17.93 | 0.10  | 8.84E-01 | no |
| Niacr1        | 0.10  | 0.15  | 0.64  | 8.84E-01 | no |
| Vamp4         | 8.67  | 9.60  | 0.15  | 8.84E-01 | no |
| Herc1         | 15.92 | 14.93 | -0.09 | 8.84E-01 | no |
| Gm8234        | 1.67  | 1.43  | -0.23 | 8.84E-01 | no |
| B3galt2       | 0.08  | 0.05  | -0.58 | 8.84E-01 | no |
| LOC100045653  | 0.09  | 0.06  | -0.66 | 8.84E-01 | no |
| Cideb         | 0.03  | 0.09  | 1.66  | 8.85E-01 | no |
| Gm5151        | 0.48  | 0.60  | 0.31  | 8.85E-01 | no |
| AU019823      | 14.87 | 13.79 | -0.11 | 8.85E-01 | no |
| Gcn1l1        | 28.75 | 26.98 | -0.09 | 8.85E-01 | no |
| Apol9a        | 0.10  | 0.04  | -1.18 | 8.85E-01 | no |
| Myom2         | 0.80  | 0.93  | 0.21  | 8.85E-01 | no |
| Fnbp4         | 35.34 | 33.16 | -0.09 | 8.85E-01 | no |
| Rbm4          | 20.09 | 18.59 | -0.11 | 8.85E-01 | no |

|            |       |       |       |          |    |
|------------|-------|-------|-------|----------|----|
| Lrrc4      | 0.04  | 0.02  | -0.89 | 8.85E-01 | no |
| Zfp82      | 4.49  | 5.07  | 0.18  | 8.85E-01 | no |
| Zfp763     | 3.53  | 3.97  | 0.17  | 8.85E-01 | no |
| Grin3a     | 0.03  | 0.05  | 0.96  | 8.86E-01 | no |
| Sort1      | 4.22  | 3.85  | -0.13 | 8.86E-01 | no |
| Abcc3      | 0.20  | 0.16  | -0.31 | 8.86E-01 | no |
| Sec24b     | 20.32 | 19.00 | -0.10 | 8.86E-01 | no |
| Klhl20     | 14.95 | 13.88 | -0.11 | 8.86E-01 | no |
| Ccdc51     | 6.26  | 5.62  | -0.16 | 8.86E-01 | no |
| Rab2a      | 29.23 | 31.48 | 0.11  | 8.86E-01 | no |
| Nt5c       | 29.34 | 26.73 | -0.13 | 8.86E-01 | no |
| Slc25a30   | 7.47  | 6.67  | -0.16 | 8.86E-01 | no |
| Rtn4r      | 0.17  | 0.23  | 0.44  | 8.86E-01 | no |
| St6galnac3 | 0.96  | 1.12  | 0.22  | 8.86E-01 | no |
| Slc5a6     | 3.21  | 3.62  | 0.18  | 8.86E-01 | no |
| Prpf40b    | 3.26  | 3.65  | 0.16  | 8.86E-01 | no |
| Zfa        | 4.69  | 5.22  | 0.16  | 8.86E-01 | no |
| Tsta3      | 18.70 | 20.46 | 0.13  | 8.86E-01 | no |
| Rxrb       | 30.21 | 28.22 | -0.10 | 8.86E-01 | no |
| Jarid2     | 16.07 | 15.01 | -0.10 | 8.86E-01 | no |
| Pex6       | 19.90 | 18.55 | -0.10 | 8.86E-01 | no |
| Robld3     | 32.75 | 29.59 | -0.15 | 8.86E-01 | no |
| Uxt        | 7.93  | 6.94  | -0.19 | 8.86E-01 | no |
| Cfh        | 0.09  | 0.06  | -0.56 | 8.86E-01 | no |
| Orm3       | 0.38  | 0.26  | -0.57 | 8.86E-01 | no |
| Pax7       | 0.26  | 0.32  | 0.27  | 8.86E-01 | no |
| Amdhd1     | 1.44  | 1.66  | 0.21  | 8.86E-01 | no |
| Setd4      | 2.76  | 3.16  | 0.19  | 8.86E-01 | no |
| BC026590   | 12.36 | 11.45 | -0.11 | 8.86E-01 | no |
| Tmf1       | 11.26 | 10.50 | -0.10 | 8.87E-01 | no |
| Vps72      | 23.38 | 21.53 | -0.12 | 8.87E-01 | no |
| Napepld    | 2.44  | 2.15  | -0.18 | 8.87E-01 | no |
| Prdx4      | 32.57 | 29.87 | -0.13 | 8.87E-01 | no |
| Grin3b     | 0.36  | 0.43  | 0.27  | 8.87E-01 | no |
| Tlr2       | 3.16  | 3.58  | 0.18  | 8.87E-01 | no |
| Usp33      | 14.81 | 13.82 | -0.10 | 8.87E-01 | no |
| Lrrc14     | 12.45 | 11.39 | -0.13 | 8.87E-01 | no |
| Zadh2      | 16.51 | 17.79 | 0.11  | 8.87E-01 | no |
| BC031781   | 22.29 | 20.76 | -0.10 | 8.87E-01 | no |
| Gatad1     | 21.07 | 19.53 | -0.11 | 8.87E-01 | no |
| Glt8d1     | 12.43 | 11.20 | -0.15 | 8.87E-01 | no |
| Vmn1r90    | 0.07  | 0.04  | -0.74 | 8.87E-01 | no |

|               |       |       |       |          |    |
|---------------|-------|-------|-------|----------|----|
| Pin1-ps1      | 2.11  | 1.79  | -0.23 | 8.87E-01 | no |
| Gm5150        | 0.07  | 0.14  | 1.01  | 8.88E-01 | no |
| Hoxb6         | 0.16  | 0.23  | 0.53  | 8.88E-01 | no |
| Folr4         | 1.89  | 2.23  | 0.24  | 8.88E-01 | no |
| Rad9b         | 1.90  | 2.21  | 0.22  | 8.88E-01 | no |
| Slc25a33      | 2.52  | 2.89  | 0.20  | 8.88E-01 | no |
| Sirt5         | 5.11  | 5.79  | 0.18  | 8.88E-01 | no |
| Nr4a1         | 3.26  | 3.68  | 0.18  | 8.88E-01 | no |
| Zbtb42        | 2.52  | 2.83  | 0.17  | 8.88E-01 | no |
| Pgpep1        | 7.16  | 7.95  | 0.15  | 8.88E-01 | no |
| Gtpbp5        | 9.27  | 10.21 | 0.14  | 8.88E-01 | no |
| Mfsd10        | 20.33 | 22.03 | 0.12  | 8.88E-01 | no |
| Mtx3          | 8.58  | 9.25  | 0.11  | 8.88E-01 | no |
| Zc3h13        | 15.77 | 14.78 | -0.09 | 8.88E-01 | no |
| Crk           | 33.50 | 31.38 | -0.09 | 8.88E-01 | no |
| Zfand3        | 20.59 | 19.12 | -0.11 | 8.88E-01 | no |
| Mtif3         | 10.38 | 9.43  | -0.14 | 8.88E-01 | no |
| Zmat5         | 14.03 | 12.54 | -0.16 | 8.88E-01 | no |
| Dnajc15       | 16.36 | 14.55 | -0.17 | 8.88E-01 | no |
| Nap1l5        | 0.34  | 0.26  | -0.38 | 8.88E-01 | no |
| Lrrc46        | 0.22  | 0.14  | -0.60 | 8.88E-01 | no |
| 4933425L06Ril | 0.06  | 0.03  | -0.88 | 8.88E-01 | no |
| Apol8         | 0.07  | 0.04  | -0.88 | 8.88E-01 | no |
| Cap2          | 0.04  | 0.02  | -0.88 | 8.88E-01 | no |
| Cited1        | 0.14  | 0.08  | -0.88 | 8.88E-01 | no |
| Cyp2ab1       | 0.05  | 0.03  | -0.88 | 8.88E-01 | no |
| Tex12         | 0.23  | 0.13  | -0.88 | 8.88E-01 | no |
| H2-M10.2      | 0.14  | 0.07  | -1.09 | 8.88E-01 | no |
| Dip2a         | 2.18  | 2.42  | 0.15  | 8.88E-01 | no |
| Tsr2          | 6.31  | 5.76  | -0.13 | 8.88E-01 | no |
| Rnf207        | 0.01  | 0.04  | 1.70  | 8.88E-01 | no |
| Scarf2        | 0.05  | 0.07  | 0.63  | 8.88E-01 | no |
| 2310039H08Ri  | 7.78  | 8.83  | 0.18  | 8.88E-01 | no |
| Acot9         | 8.16  | 9.13  | 0.16  | 8.88E-01 | no |
| Bax           | 27.09 | 29.60 | 0.13  | 8.88E-01 | no |
| Spg21         | 17.87 | 19.28 | 0.11  | 8.88E-01 | no |
| Nktr          | 30.44 | 32.39 | 0.09  | 8.88E-01 | no |
| Epn1          | 41.57 | 38.98 | -0.09 | 8.88E-01 | no |
| Tmem26        | 1.31  | 1.14  | -0.20 | 8.88E-01 | no |
| Spata21       | 0.05  | 0.03  | -0.84 | 8.88E-01 | no |
| Myo18b        | 0.02  | 0.01  | -1.09 | 8.88E-01 | no |
| Cml2          | 0.22  | 0.18  | -0.35 | 8.88E-01 | no |



|              |        |        |       |          |    |
|--------------|--------|--------|-------|----------|----|
| Trmt61b      | 5.49   | 6.30   | 0.20  | 8.88E-01 | no |
| Dvl3         | 16.06  | 17.29  | 0.11  | 8.88E-01 | no |
| Vps33a       | 16.44  | 17.61  | 0.10  | 8.88E-01 | no |
| 1500003O03Ri | 38.99  | 36.50  | -0.10 | 8.88E-01 | no |
| Lin52        | 8.56   | 7.71   | -0.15 | 8.88E-01 | no |
| Xlr3c        | 0.71   | 0.58   | -0.30 | 8.88E-01 | no |
| Galnt2       | 20.53  | 21.93  | 0.09  | 8.89E-01 | no |
| Tatdn2       | 21.31  | 19.83  | -0.10 | 8.89E-01 | no |
| Kctd4        | 0.04   | 0.02   | -1.49 | 8.89E-01 | no |
| Dnajc2       | 31.43  | 29.31  | -0.10 | 8.89E-01 | no |
| D930016D06R  | 7.53   | 6.86   | -0.13 | 8.89E-01 | no |
| P2rx5        | 0.13   | 0.09   | -0.57 | 8.89E-01 | no |
| Spatc1       | 0.07   | 0.12   | 0.74  | 8.89E-01 | no |
| Mid1         | 0.91   | 1.06   | 0.22  | 8.89E-01 | no |
| Acn9         | 5.43   | 6.30   | 0.21  | 8.89E-01 | no |
| Fam184a      | 0.20   | 0.25   | 0.31  | 8.89E-01 | no |
| Jtb          | 24.56  | 26.79  | 0.13  | 8.89E-01 | no |
| Tex2         | 6.33   | 6.87   | 0.12  | 8.89E-01 | no |
| 2310001A20Ri | 16.14  | 17.51  | 0.12  | 8.89E-01 | no |
| 2700007P21Ri | 14.07  | 15.16  | 0.11  | 8.89E-01 | no |
| Zc3h11a      | 44.15  | 46.97  | 0.09  | 8.89E-01 | no |
| Elp2         | 27.41  | 25.60  | -0.10 | 8.89E-01 | no |
| Cog8         | 21.99  | 20.39  | -0.11 | 8.89E-01 | no |
| Sec61b       | 71.09  | 65.71  | -0.11 | 8.89E-01 | no |
| Mfn1         | 8.79   | 8.11   | -0.12 | 8.89E-01 | no |
| Cfl2         | 12.35  | 11.30  | -0.13 | 8.89E-01 | no |
| Rsc1a1       | 8.27   | 7.47   | -0.15 | 8.89E-01 | no |
| Gm6194       | 4.34   | 3.84   | -0.18 | 8.89E-01 | no |
| Proz         | 2.89   | 3.27   | 0.18  | 8.89E-01 | no |
| BC048609     | 0.09   | 0.22   | 1.31  | 8.89E-01 | no |
| Tmed2        | 117.94 | 110.87 | -0.09 | 8.89E-01 | no |
| Pdcd5        | 16.81  | 15.01  | -0.16 | 8.89E-01 | no |
| Daglb        | 3.44   | 3.06   | -0.17 | 8.89E-01 | no |
| Trpv4        | 0.07   | 0.04   | -0.73 | 8.89E-01 | no |
| Ltbp2        | 0.01   | 0.02   | 1.05  | 8.89E-01 | no |
| 2410006H16Ri | 27.70  | 30.83  | 0.15  | 8.89E-01 | no |
| 2-Mar        | 7.96   | 8.69   | 0.13  | 8.89E-01 | no |
| Zc3hav1l     | 8.46   | 9.12   | 0.11  | 8.89E-01 | no |
| Mcm3ap       | 19.26  | 18.08  | -0.09 | 8.89E-01 | no |
| Prr12        | 17.09  | 16.05  | -0.09 | 8.89E-01 | no |
| Ctr9         | 19.65  | 18.40  | -0.09 | 8.89E-01 | no |
| Smc1b        | 0.06   | 0.08   | 0.53  | 8.90E-01 | no |

|              |         |         |       |          |    |
|--------------|---------|---------|-------|----------|----|
| Nanos3       | 0.61    | 0.79    | 0.37  | 8.90E-01 | no |
| Tbx6         | 5.71    | 6.39    | 0.16  | 8.90E-01 | no |
| Zranb2       | 47.49   | 44.54   | -0.09 | 8.90E-01 | no |
| Mad2l1bp     | 17.85   | 16.24   | -0.14 | 8.90E-01 | no |
| 5830415F09Ri | 4.91    | 5.53    | 0.17  | 8.90E-01 | no |
| Ppp2r1a      | 56.53   | 53.09   | -0.09 | 8.90E-01 | no |
| Zfp772       | 2.09    | 1.82    | -0.19 | 8.90E-01 | no |
| Esyt3        | 0.21    | 0.17    | -0.30 | 8.90E-01 | no |
| Wsb2         | 8.67    | 9.51    | 0.13  | 8.90E-01 | no |
| Rab3gap1     | 16.05   | 17.18   | 0.10  | 8.90E-01 | no |
| Crebzf       | 30.58   | 32.56   | 0.09  | 8.90E-01 | no |
| Dvl1         | 17.62   | 16.43   | -0.10 | 8.90E-01 | no |
| Afg3l2       | 17.34   | 16.13   | -0.10 | 8.90E-01 | no |
| Slc2a5       | 0.04    | 0.07    | 0.70  | 8.90E-01 | no |
| Slc25a46     | 16.94   | 15.79   | -0.10 | 8.90E-01 | no |
| Ms4a4b       | 1.10    | 1.32    | 0.27  | 8.90E-01 | no |
| Spon2        | 0.06    | 0.03    | -1.06 | 8.90E-01 | no |
| E430016F16Ri | 0.11    | 0.15    | 0.45  | 8.90E-01 | no |
| Nudt2        | 7.40    | 8.40    | 0.18  | 8.90E-01 | no |
| Map4k4       | 32.78   | 30.83   | -0.09 | 8.90E-01 | no |
| Foxd2        | 1.30    | 1.50    | 0.21  | 8.90E-01 | no |
| Cyp20a1      | 6.69    | 7.51    | 0.17  | 8.90E-01 | no |
| Vcpip1       | 26.87   | 28.61   | 0.09  | 8.90E-01 | no |
| Cerk         | 54.93   | 58.42   | 0.09  | 8.90E-01 | no |
| Elovl5       | 38.21   | 35.80   | -0.09 | 8.90E-01 | no |
| Pgbd1        | 0.59    | 0.48    | -0.30 | 8.90E-01 | no |
| Ube2e2       | 0.45    | 0.35    | -0.38 | 8.90E-01 | no |
| Cdkn2a       | 0.54    | 0.41    | -0.40 | 8.90E-01 | no |
| Tab3         | 6.40    | 6.93    | 0.11  | 8.91E-01 | no |
| Ppp6r1       | 65.13   | 69.22   | 0.09  | 8.91E-01 | no |
| Tpt1p        | 1613.97 | 1500.77 | -0.10 | 8.91E-01 | no |
| Fam192a      | 27.46   | 25.51   | -0.11 | 8.91E-01 | no |
| Yipf4        | 18.07   | 16.59   | -0.12 | 8.91E-01 | no |
| Rad51l1      | 3.43    | 3.01    | -0.19 | 8.91E-01 | no |
| Pin4         | 6.48    | 5.58    | -0.22 | 8.91E-01 | no |
| 8-Sep        | 1.72    | 1.95    | 0.17  | 8.91E-01 | no |
| Riok3        | 22.22   | 20.77   | -0.10 | 8.91E-01 | no |
| Ttc39c       | 0.10    | 0.06    | -0.72 | 8.91E-01 | no |
| Peo1         | 9.58    | 10.37   | 0.11  | 8.91E-01 | no |
| Fam160b2     | 16.43   | 15.36   | -0.10 | 8.91E-01 | no |
| Klf16        | 10.22   | 9.36    | -0.13 | 8.91E-01 | no |
| 5930434B04Ri | 13.98   | 12.74   | -0.13 | 8.91E-01 | no |

|              |       |       |       |          |    |
|--------------|-------|-------|-------|----------|----|
| Cmas         | 18.05 | 19.58 | 0.12  | 8.91E-01 | no |
| Ugt3a2       | 0.07  | 0.10  | 0.68  | 8.91E-01 | no |
| Fosl2        | 0.40  | 0.47  | 0.23  | 8.91E-01 | no |
| Hhex         | 28.36 | 26.31 | -0.11 | 8.91E-01 | no |
| Clpp         | 13.88 | 12.57 | -0.14 | 8.91E-01 | no |
| Atf4         | 57.32 | 53.78 | -0.09 | 8.91E-01 | no |
| Tmem204      | 0.56  | 0.68  | 0.27  | 8.92E-01 | no |
| Klhl24       | 45.93 | 48.81 | 0.09  | 8.92E-01 | no |
| 2900073G15Ri | 42.98 | 40.21 | -0.10 | 8.92E-01 | no |
| Rnf2         | 28.13 | 26.31 | -0.10 | 8.92E-01 | no |
| Dnahc9       | 0.01  | 0.00  | -1.05 | 8.92E-01 | no |
| Arl9         | 0.40  | 0.19  | -1.05 | 8.92E-01 | no |
| Ahnak        | 4.68  | 1.68  | -1.47 | 8.92E-01 | no |
| Vezt         | 4.49  | 4.94  | 0.14  | 8.92E-01 | no |
| Gopc         | 16.71 | 17.85 | 0.10  | 8.92E-01 | no |
| Nmd3         | 18.83 | 17.30 | -0.12 | 8.92E-01 | no |
| Eif2b3       | 8.12  | 7.31  | -0.15 | 8.92E-01 | no |
| Acat3        | 5.01  | 4.46  | -0.17 | 8.92E-01 | no |
| Tctn2        | 0.82  | 0.70  | -0.23 | 8.92E-01 | no |
| Bet1         | 15.40 | 16.97 | 0.14  | 8.92E-01 | no |
| Efr3a        | 26.42 | 24.82 | -0.09 | 8.92E-01 | no |
| Chic2        | 19.25 | 17.50 | -0.14 | 8.92E-01 | no |
| 3110021A11Ri | 0.19  | 0.30  | 0.64  | 8.92E-01 | no |
| Myh14        | 0.00  | 0.02  | 2.35  | 8.92E-01 | no |
| Grid2ip      | 0.02  | 0.04  | 0.91  | 8.92E-01 | no |
| Gm8773       | 0.09  | 0.16  | 0.91  | 8.92E-01 | no |
| Ogdhl        | 0.07  | 0.10  | 0.48  | 8.92E-01 | no |
| LOC100316870 | 0.02  | 0.03  | 0.46  | 8.92E-01 | no |
| Isg15        | 5.88  | 6.71  | 0.19  | 8.92E-01 | no |
| Ift81        | 1.64  | 1.88  | 0.19  | 8.92E-01 | no |
| Tnfaip8l2    | 7.95  | 8.90  | 0.16  | 8.92E-01 | no |
| Slc10a3      | 7.67  | 8.50  | 0.15  | 8.92E-01 | no |
| Commd9       | 12.60 | 13.92 | 0.14  | 8.92E-01 | no |
| Alkbh3       | 13.76 | 15.14 | 0.14  | 8.92E-01 | no |
| Rfng         | 13.25 | 14.39 | 0.12  | 8.92E-01 | no |
| Osbpl2       | 11.78 | 12.75 | 0.11  | 8.92E-01 | no |
| Rbm12b       | 14.21 | 15.30 | 0.11  | 8.92E-01 | no |
| Ulk2         | 11.38 | 12.18 | 0.10  | 8.92E-01 | no |
| Ncstn        | 25.07 | 26.77 | 0.09  | 8.92E-01 | no |
| Abl1         | 39.73 | 37.91 | -0.07 | 8.92E-01 | no |
| Clk2         | 27.28 | 25.59 | -0.09 | 8.92E-01 | no |
| Surf6        | 21.89 | 20.43 | -0.10 | 8.92E-01 | no |

|              |       |       |       |          |    |
|--------------|-------|-------|-------|----------|----|
| Ube2e3       | 38.89 | 36.25 | -0.10 | 8.92E-01 | no |
| Cd48         | 44.90 | 41.77 | -0.10 | 8.92E-01 | no |
| Slc10a7      | 14.93 | 13.88 | -0.11 | 8.92E-01 | no |
| Anapc4       | 19.82 | 18.42 | -0.11 | 8.92E-01 | no |
| 2810432D09Ri | 22.77 | 20.72 | -0.14 | 8.92E-01 | no |
| Mrps11       | 14.29 | 12.92 | -0.15 | 8.92E-01 | no |
| Cltb         | 7.36  | 6.60  | -0.16 | 8.92E-01 | no |
| Rapgef3      | 2.35  | 2.10  | -0.16 | 8.92E-01 | no |
| Fam173b      | 6.86  | 6.08  | -0.17 | 8.92E-01 | no |
| Nudt8        | 3.51  | 3.03  | -0.21 | 8.92E-01 | no |
| Zfp786       | 0.66  | 0.56  | -0.24 | 8.92E-01 | no |
| Wnt9a        | 0.42  | 0.35  | -0.26 | 8.92E-01 | no |
| Mip          | 0.35  | 0.28  | -0.33 | 8.92E-01 | no |
| Adamts8      | 0.04  | 0.02  | -1.06 | 8.92E-01 | no |
| Ctsz         | 31.16 | 28.94 | -0.11 | 8.93E-01 | no |
| 5-Mar        | 30.53 | 32.40 | 0.09  | 8.93E-01 | no |
| Gm6900       | 3.81  | 3.26  | -0.22 | 8.93E-01 | no |
| Tnnc2        | 0.46  | 0.33  | -0.49 | 8.93E-01 | no |
| Tarm1        | 0.07  | 0.14  | 0.94  | 8.93E-01 | no |
| Ppargc1b     | 2.72  | 3.03  | 0.16  | 8.93E-01 | no |
| Ubash3a      | 23.49 | 25.05 | 0.09  | 8.93E-01 | no |
| Tmed10       | 37.61 | 35.35 | -0.09 | 8.93E-01 | no |
| Zbtb8os      | 13.00 | 11.54 | -0.17 | 8.93E-01 | no |
| Dhrs7b       | 10.37 | 9.42  | -0.14 | 8.93E-01 | no |
| Sh3bgrl      | 60.44 | 56.85 | -0.09 | 8.94E-01 | no |
| 9130019O22Ri | 3.31  | 2.97  | -0.15 | 8.94E-01 | no |
| 4933408B17Ri | 1.19  | 1.02  | -0.22 | 8.94E-01 | no |
| Alkbh5       | 28.32 | 26.67 | -0.09 | 8.94E-01 | no |
| Hgfac        | 0.16  | 0.11  | -0.48 | 8.94E-01 | no |
| BC016579     | 0.05  | 0.09  | 0.90  | 8.94E-01 | no |
| Mosc2        | 21.40 | 23.08 | 0.11  | 8.94E-01 | no |
| Spaca4       | 0.16  | 0.09  | -0.81 | 8.94E-01 | no |
| Pitpnm2      | 19.69 | 18.52 | -0.09 | 8.94E-01 | no |
| Wasf2        | 64.95 | 61.19 | -0.09 | 8.94E-01 | no |
| 2310042D19Ri | 0.48  | 0.57  | 0.24  | 8.94E-01 | no |
| Hist1h2ak    | 0.37  | 0.21  | -0.81 | 8.94E-01 | no |
| Atp6v1c1     | 23.64 | 25.41 | 0.10  | 8.94E-01 | no |
| Oscp1        | 1.90  | 1.66  | -0.20 | 8.95E-01 | no |
| Acadl        | 34.53 | 32.28 | -0.10 | 8.95E-01 | no |
| Tbccd1       | 10.56 | 9.70  | -0.12 | 8.95E-01 | no |
| Spin4        | 0.07  | 0.04  | -0.73 | 8.95E-01 | no |
| Trim43a      | 0.16  | 0.22  | 0.48  | 8.95E-01 | no |

|               |       |       |       |          |    |
|---------------|-------|-------|-------|----------|----|
| Yif1a         | 10.20 | 11.27 | 0.14  | 8.96E-01 | no |
| Wdr54         | 0.27  | 0.20  | -0.48 | 8.96E-01 | no |
| Birc2         | 28.24 | 30.10 | 0.09  | 8.96E-01 | no |
| Mllt10        | 27.36 | 25.75 | -0.09 | 8.96E-01 | no |
| Gm5077        | 0.03  | 0.05  | 0.91  | 8.96E-01 | no |
| Erc1          | 4.39  | 5.44  | 0.31  | 8.96E-01 | no |
| D630037F22Ri  | 1.79  | 1.99  | 0.15  | 8.96E-01 | no |
| Lin37         | 13.72 | 15.15 | 0.14  | 8.96E-01 | no |
| Zfx           | 18.17 | 19.17 | 0.08  | 8.96E-01 | no |
| Atxn7l3b      | 44.38 | 41.80 | -0.09 | 8.96E-01 | no |
| Kdm6a         | 21.77 | 20.47 | -0.09 | 8.96E-01 | no |
| 9930111J21Ril | 12.06 | 11.21 | -0.11 | 8.96E-01 | no |
| Gm14391       | 0.11  | 0.20  | 0.79  | 8.96E-01 | no |
| Nwd1          | 0.03  | 0.04  | 0.51  | 8.96E-01 | no |
| Snopc2        | 14.49 | 15.79 | 0.12  | 8.96E-01 | no |
| Ext1          | 7.11  | 7.75  | 0.12  | 8.96E-01 | no |
| Klhl9         | 27.83 | 29.59 | 0.09  | 8.96E-01 | no |
| Sfrs18        | 37.26 | 35.10 | -0.09 | 8.96E-01 | no |
| Ptplad1       | 16.89 | 15.68 | -0.11 | 8.96E-01 | no |
| Ptpn12        | 8.83  | 8.10  | -0.12 | 8.96E-01 | no |
| Ddx43         | 0.09  | 0.05  | -0.76 | 8.96E-01 | no |
| Ormdl1        | 19.25 | 17.72 | -0.12 | 8.97E-01 | no |
| 1700049L16Ril | 0.24  | 0.35  | 0.55  | 8.97E-01 | no |
| Al317395      | 0.12  | 0.17  | 0.44  | 8.97E-01 | no |
| Tmem160       | 18.48 | 20.40 | 0.14  | 8.97E-01 | no |
| Ankrd28       | 27.16 | 28.85 | 0.09  | 8.97E-01 | no |
| Tram1         | 73.20 | 69.04 | -0.08 | 8.97E-01 | no |
| 1110018G07Ri  | 23.92 | 22.52 | -0.09 | 8.97E-01 | no |
| Cnrip1        | 6.23  | 5.54  | -0.17 | 8.97E-01 | no |
| 1110065P20Ri  | 3.04  | 3.51  | 0.21  | 8.98E-01 | no |
| Ccl25         | 2.66  | 3.07  | 0.21  | 8.98E-01 | no |
| Zfp11         | 12.41 | 13.66 | 0.14  | 8.98E-01 | no |
| Acad11        | 4.92  | 5.41  | 0.14  | 8.98E-01 | no |
| 5830433M19R   | 9.29  | 8.44  | -0.14 | 8.98E-01 | no |
| Sh3bp4        | 0.22  | 0.26  | 0.27  | 8.98E-01 | no |
| Fam13a        | 0.88  | 1.01  | 0.20  | 8.98E-01 | no |
| Ap1s1         | 35.60 | 33.14 | -0.10 | 8.98E-01 | no |
| Ino80e        | 32.22 | 29.83 | -0.11 | 8.98E-01 | no |
| Gm16039       | 13.82 | 12.70 | -0.12 | 8.98E-01 | no |
| Rpl26         | 19.28 | 11.28 | -0.77 | 8.98E-01 | no |
| Nphp1         | 6.67  | 6.04  | -0.14 | 8.98E-01 | no |
| Glrbl         | 0.04  | 0.07  | 0.85  | 8.98E-01 | no |

|              |        |        |       |          |    |
|--------------|--------|--------|-------|----------|----|
| Commd6       | 14.60  | 16.23  | 0.15  | 8.98E-01 | no |
| Mpp1         | 39.73  | 42.26  | 0.09  | 8.98E-01 | no |
| Trp53        | 66.61  | 70.10  | 0.07  | 8.98E-01 | no |
| Taok1        | 17.38  | 16.38  | -0.09 | 8.98E-01 | no |
| Picalm       | 39.64  | 37.35  | -0.09 | 8.98E-01 | no |
| Tshz1        | 11.39  | 10.67  | -0.09 | 8.98E-01 | no |
| Hdac6        | 11.84  | 11.08  | -0.10 | 8.98E-01 | no |
| Mrpl23       | 44.65  | 41.03  | -0.12 | 8.98E-01 | no |
| Mrm1         | 9.99   | 9.16   | -0.12 | 8.98E-01 | no |
| Abhd4        | 6.47   | 5.86   | -0.14 | 8.98E-01 | no |
| 9630033F20Ri | 3.82   | 3.44   | -0.15 | 8.98E-01 | no |
| Fbxo46       | 7.83   | 7.18   | -0.13 | 8.98E-01 | no |
| Kif5c        | 0.05   | 0.04   | -0.48 | 8.98E-01 | no |
| Spink13      | 0.12   | 0.21   | 0.77  | 8.99E-01 | no |
| Tigd5        | 1.21   | 1.07   | -0.18 | 8.99E-01 | no |
| Zrsr2        | 14.01  | 13.14  | -0.09 | 8.99E-01 | no |
| Cyp4f14      | 0.01   | 0.05   | 2.26  | 9.00E-01 | no |
| Syt14        | 0.03   | 0.06   | 1.23  | 9.00E-01 | no |
| Stx8         | 2.76   | 3.06   | 0.15  | 9.00E-01 | no |
| 1200016B10Ri | 7.09   | 7.72   | 0.12  | 9.00E-01 | no |
| Leprot       | 20.83  | 22.48  | 0.11  | 9.00E-01 | no |
| Ccng1        | 25.57  | 27.22  | 0.09  | 9.00E-01 | no |
| Mtss1        | 39.42  | 41.45  | 0.07  | 9.00E-01 | no |
| Ino80d       | 20.81  | 21.78  | 0.07  | 9.00E-01 | no |
| Lgals9       | 179.51 | 170.42 | -0.07 | 9.00E-01 | no |
| Myo1g        | 26.49  | 24.91  | -0.09 | 9.00E-01 | no |
| Ogg1         | 8.48   | 7.65   | -0.15 | 9.00E-01 | no |
| Gsr          | 3.52   | 3.13   | -0.17 | 9.00E-01 | no |
| Scarna6      | 1.29   | 0.86   | -0.58 | 9.00E-01 | no |
| Mef2d        | 70.70  | 66.73  | -0.08 | 9.00E-01 | no |
| Bglap2       | 0.21   | 0.36   | 0.81  | 9.00E-01 | no |
| Gm8096       | 0.11   | 0.16   | 0.53  | 9.00E-01 | no |
| Pigy         | 3.24   | 3.57   | 0.14  | 9.00E-01 | no |
| Tarbp2       | 18.92  | 17.51  | -0.11 | 9.00E-01 | no |
| 2010007H12Ri | 30.45  | 28.14  | -0.11 | 9.00E-01 | no |
| Trim72       | 0.03   | 0.06   | 0.98  | 9.00E-01 | no |
| Hp1bp3       | 79.26  | 83.34  | 0.07  | 9.00E-01 | no |
| Sh3bp2       | 11.66  | 10.90  | -0.10 | 9.00E-01 | no |
| Dync1li1     | 17.82  | 16.52  | -0.11 | 9.00E-01 | no |
| Ngdn         | 21.33  | 19.63  | -0.12 | 9.00E-01 | no |
| Mrps24       | 21.92  | 20.07  | -0.13 | 9.00E-01 | no |
| Gm16381      | 18.08  | 16.48  | -0.13 | 9.00E-01 | no |

|              |        |        |       |          |    |
|--------------|--------|--------|-------|----------|----|
| Cnn1         | 2.04   | 1.78   | -0.20 | 9.00E-01 | no |
| Hist1h3f     | 0.27   | 0.18   | -0.60 | 9.00E-01 | no |
| 0610040B10Ri | 1.90   | 2.34   | 0.30  | 9.00E-01 | no |
| Zfp933       | 5.35   | 5.85   | 0.13  | 9.00E-01 | no |
| Vps28        | 25.12  | 27.30  | 0.12  | 9.00E-01 | no |
| Gm1673       | 0.64   | 0.44   | -0.54 | 9.00E-01 | no |
| Rhod         | 0.20   | 0.13   | -0.56 | 9.00E-01 | no |
| Hyal1        | 0.03   | 0.07   | 0.98  | 9.00E-01 | no |
| Dopey1       | 6.85   | 7.31   | 0.09  | 9.00E-01 | no |
| Btc          | 0.04   | 0.08   | 0.87  | 9.01E-01 | no |
| Htra3        | 0.27   | 0.21   | -0.35 | 9.01E-01 | no |
| Gm10536      | 0.04   | 0.07   | 0.64  | 9.01E-01 | no |
| Parp11       | 16.34  | 17.46  | 0.10  | 9.01E-01 | no |
| Stau2        | 4.23   | 3.81   | -0.15 | 9.01E-01 | no |
| Gmids        | 13.35  | 14.57  | 0.13  | 9.01E-01 | no |
| Aplp1        | 0.03   | 0.05   | 0.90  | 9.01E-01 | no |
| Gm10941      | 0.23   | 0.34   | 0.57  | 9.01E-01 | no |
| Vps37d       | 0.17   | 0.24   | 0.53  | 9.01E-01 | no |
| Mum1l1       | 0.29   | 0.36   | 0.30  | 9.01E-01 | no |
| Fam109b      | 0.31   | 0.38   | 0.30  | 9.01E-01 | no |
| Frs3         | 0.27   | 0.32   | 0.28  | 9.01E-01 | no |
| Rcn1         | 7.29   | 7.95   | 0.12  | 9.01E-01 | no |
| Csnk1g3      | 16.67  | 15.62  | -0.09 | 9.01E-01 | no |
| Ccdc134      | 19.30  | 17.95  | -0.10 | 9.01E-01 | no |
| Tubg2        | 4.18   | 3.73   | -0.17 | 9.01E-01 | no |
| Asns         | 2.26   | 1.98   | -0.19 | 9.02E-01 | no |
| Tmem81       | 6.37   | 7.08   | 0.15  | 9.02E-01 | no |
| D10Wsu102e   | 18.24  | 17.09  | -0.09 | 9.02E-01 | no |
| Pkhd1l1      | 0.02   | 0.02   | -0.49 | 9.02E-01 | no |
| Phf12        | 33.97  | 32.07  | -0.08 | 9.02E-01 | no |
| Uba52        | 260.61 | 245.92 | -0.08 | 9.02E-01 | no |
| Sec11a       | 36.26  | 33.63  | -0.11 | 9.02E-01 | no |
| Prss50       | 0.06   | 0.10   | 0.87  | 9.02E-01 | no |
| Pfkm         | 6.03   | 6.78   | 0.17  | 9.02E-01 | no |
| Lgr6         | 0.02   | 0.04   | 0.97  | 9.02E-01 | no |
| Wdfy3        | 1.97   | 1.82   | -0.12 | 9.02E-01 | no |
| Elmod3       | 8.01   | 7.30   | -0.13 | 9.02E-01 | no |
| Pcolce       | 0.87   | 0.74   | -0.25 | 9.02E-01 | no |
| Jub          | 3.96   | 4.37   | 0.14  | 9.02E-01 | no |
| Zfp516       | 1.46   | 1.61   | 0.15  | 9.03E-01 | no |
| Ddx26b       | 14.79  | 13.81  | -0.10 | 9.03E-01 | no |
| Fastkd1      | 7.35   | 6.70   | -0.13 | 9.03E-01 | no |

|              |       |       |       |          |    |
|--------------|-------|-------|-------|----------|----|
| Bcdin3d      | 6.16  | 5.50  | -0.16 | 9.03E-01 | no |
| Celsr3       | 0.03  | 0.02  | -0.45 | 9.03E-01 | no |
| Tmem161a     | 8.62  | 9.34  | 0.12  | 9.03E-01 | no |
| Nampt        | 14.81 | 15.80 | 0.09  | 9.03E-01 | no |
| Ezr          | 59.53 | 63.00 | 0.08  | 9.03E-01 | no |
| Rep15        | 0.07  | 0.13  | 0.89  | 9.03E-01 | no |
| Accn3        | 0.08  | 0.12  | 0.63  | 9.03E-01 | no |
| Dbil5        | 0.34  | 0.49  | 0.53  | 9.03E-01 | no |
| 4931406H21Ri | 0.16  | 0.20  | 0.31  | 9.03E-01 | no |
| Zfp329       | 10.07 | 10.72 | 0.09  | 9.03E-01 | no |
| Senp6        | 24.63 | 26.12 | 0.08  | 9.03E-01 | no |
| Dda1         | 27.05 | 25.36 | -0.09 | 9.03E-01 | no |
| Mvk          | 7.80  | 7.07  | -0.14 | 9.03E-01 | no |
| Gm6537       | 0.13  | 0.06  | -0.99 | 9.03E-01 | no |
| Pigz         | 0.10  | 0.07  | -0.65 | 9.03E-01 | no |
| Rab5a        | 19.89 | 21.35 | 0.10  | 9.03E-01 | no |
| Golph3       | 36.43 | 34.28 | -0.09 | 9.03E-01 | no |
| Dhx29        | 11.01 | 10.27 | -0.10 | 9.03E-01 | no |
| Vhl          | 11.60 | 12.54 | 0.11  | 9.03E-01 | no |
| Chchd1       | 30.07 | 27.49 | -0.13 | 9.03E-01 | no |
| Rbks         | 5.87  | 6.60  | 0.17  | 9.03E-01 | no |
| Atat1        | 8.79  | 9.55  | 0.12  | 9.03E-01 | no |
| Trim43c      | 0.84  | 0.71  | -0.24 | 9.03E-01 | no |
| Tmem168      | 14.16 | 15.13 | 0.10  | 9.03E-01 | no |
| Dhx40        | 16.63 | 17.75 | 0.09  | 9.04E-01 | no |
| Intu         | 1.66  | 1.84  | 0.15  | 9.04E-01 | no |
| Kti12        | 24.70 | 22.97 | -0.10 | 9.04E-01 | no |
| 6330439K17Ri | 0.06  | 0.08  | 0.37  | 9.04E-01 | no |
| Polr3c       | 26.31 | 24.57 | -0.10 | 9.04E-01 | no |
| Cope         | 38.95 | 36.31 | -0.10 | 9.04E-01 | no |
| Dhx32        | 10.89 | 10.09 | -0.11 | 9.04E-01 | no |
| Hoxb7        | 0.07  | 0.12  | 0.86  | 9.04E-01 | no |
| Heatr5b      | 9.75  | 10.39 | 0.09  | 9.04E-01 | no |
| Hmgxb3       | 11.71 | 12.41 | 0.08  | 9.04E-01 | no |
| Golga4       | 15.19 | 16.09 | 0.08  | 9.04E-01 | no |
| Dctn4        | 21.78 | 20.48 | -0.09 | 9.04E-01 | no |
| Capg         | 14.57 | 13.36 | -0.12 | 9.04E-01 | no |
| Mettl10      | 14.75 | 13.38 | -0.14 | 9.04E-01 | no |
| Atp10b       | 0.04  | 0.03  | -0.56 | 9.04E-01 | no |
| 9030418K01Ri | 0.25  | 0.31  | 0.31  | 9.04E-01 | no |
| Nfxl1        | 4.84  | 5.31  | 0.13  | 9.04E-01 | no |
| BC025920     | 5.05  | 5.61  | 0.15  | 9.04E-01 | no |



|               |        |        |       |          |    |
|---------------|--------|--------|-------|----------|----|
| Kdelr1        | 32.24  | 30.08  | -0.10 | 9.04E-01 | no |
| Kcnj14        | 0.07   | 0.04   | -0.73 | 9.04E-01 | no |
| Mafb          | 0.13   | 0.17   | 0.35  | 9.05E-01 | no |
| Rnf25         | 10.96  | 11.99  | 0.13  | 9.05E-01 | no |
| Zfp384        | 29.87  | 28.15  | -0.09 | 9.05E-01 | no |
| Dsp           | 0.02   | 0.02   | 0.60  | 9.05E-01 | no |
| Rnf157        | 18.80  | 19.95  | 0.09  | 9.05E-01 | no |
| Ppib          | 84.68  | 79.65  | -0.09 | 9.05E-01 | no |
| Arl16         | 4.92   | 4.42   | -0.15 | 9.05E-01 | no |
| Casp8         | 32.86  | 31.07  | -0.08 | 9.05E-01 | no |
| Cdh15         | 0.12   | 0.09   | -0.44 | 9.05E-01 | no |
| 4933430117Rik | 0.40   | 0.33   | -0.29 | 9.05E-01 | no |
| Srp54c        | 23.84  | 22.31  | -0.10 | 9.05E-01 | no |
| Per3          | 1.89   | 2.09   | 0.14  | 9.06E-01 | no |
| Slamf6        | 50.31  | 53.36  | 0.08  | 9.06E-01 | no |
| Pfdn1         | 17.46  | 15.98  | -0.13 | 9.06E-01 | no |
| Cox17         | 29.96  | 27.15  | -0.14 | 9.06E-01 | no |
| Ccdc57        | 2.57   | 2.31   | -0.15 | 9.06E-01 | no |
| Ly6i          | 0.31   | 0.43   | 0.47  | 9.06E-01 | no |
| Ccdc155       | 0.11   | 0.14   | 0.44  | 9.06E-01 | no |
| Sertad1       | 5.73   | 6.40   | 0.16  | 9.06E-01 | no |
| Eif4ebp3      | 9.76   | 10.79  | 0.15  | 9.06E-01 | no |
| Stxbp2        | 23.33  | 24.82  | 0.09  | 9.06E-01 | no |
| Icmt          | 21.75  | 23.04  | 0.08  | 9.06E-01 | no |
| Trpc4ap       | 37.79  | 39.93  | 0.08  | 9.06E-01 | no |
| Maf1          | 54.55  | 57.36  | 0.07  | 9.06E-01 | no |
| Ttf1          | 14.30  | 13.43  | -0.09 | 9.06E-01 | no |
| Atg4a         | 7.57   | 6.88   | -0.14 | 9.06E-01 | no |
| Rai12         | 22.70  | 19.69  | -0.21 | 9.06E-01 | no |
| Prex2         | 0.04   | 0.03   | -0.66 | 9.06E-01 | no |
| Tgfb2         | 0.03   | 0.02   | -0.97 | 9.06E-01 | no |
| Daam2         | 0.11   | 0.14   | 0.28  | 9.06E-01 | no |
| Sall2         | 0.80   | 0.91   | 0.18  | 9.06E-01 | no |
| Rogdi         | 5.81   | 6.47   | 0.16  | 9.06E-01 | no |
| Eif3h         | 123.07 | 116.37 | -0.08 | 9.06E-01 | no |
| Trim37        | 19.08  | 18.01  | -0.08 | 9.06E-01 | no |
| Prr3          | 14.57  | 13.58  | -0.10 | 9.06E-01 | no |
| 1300014106Rik | 0.10   | 0.06   | -0.72 | 9.06E-01 | no |
| Mtap1a        | 0.38   | 0.18   | -1.08 | 9.06E-01 | no |
| Slc16a12      | 0.02   | 0.03   | 0.90  | 9.06E-01 | no |
| Syn3          | 0.62   | 0.77   | 0.32  | 9.06E-01 | no |
| Acaa1a        | 16.09  | 17.36  | 0.11  | 9.06E-01 | no |

|               |       |       |       |          |    |
|---------------|-------|-------|-------|----------|----|
| Zdhhc6        | 20.43 | 19.09 | -0.10 | 9.06E-01 | no |
| Atp8b4        | 1.79  | 1.60  | -0.17 | 9.06E-01 | no |
| Ccdc42b       | 0.63  | 0.50  | -0.33 | 9.06E-01 | no |
| Fcna          | 0.43  | 0.34  | -0.34 | 9.06E-01 | no |
| Plb1          | 0.21  | 0.12  | -0.82 | 9.06E-01 | no |
| 4922501C03Ri  | 6.10  | 6.56  | 0.11  | 9.07E-01 | no |
| Rbfa          | 16.84 | 18.23 | 0.11  | 9.07E-01 | no |
| Wrap53        | 12.21 | 11.24 | -0.12 | 9.07E-01 | no |
| 2610204G22Ri  | 1.30  | 1.55  | 0.26  | 9.07E-01 | no |
| Pex11c        | 2.87  | 3.28  | 0.19  | 9.07E-01 | no |
| Ulk3          | 9.80  | 10.58 | 0.11  | 9.07E-01 | no |
| Dexi          | 7.38  | 6.65  | -0.15 | 9.07E-01 | no |
| Adam4         | 0.63  | 0.53  | -0.26 | 9.07E-01 | no |
| Dnajb9        | 10.16 | 11.14 | 0.13  | 9.07E-01 | no |
| Pdgfb         | 0.04  | 0.06  | 0.72  | 9.07E-01 | no |
| Orm2          | 0.33  | 0.46  | 0.46  | 9.07E-01 | no |
| D4Wsu53e      | 83.67 | 88.50 | 0.08  | 9.07E-01 | no |
| Gm5918        | 4.37  | 3.83  | -0.19 | 9.07E-01 | no |
| 4932412H11Ri  | 0.12  | 0.16  | 0.42  | 9.07E-01 | no |
| Bsnd          | 0.12  | 0.16  | 0.37  | 9.07E-01 | no |
| Gm13154       | 0.29  | 0.35  | 0.28  | 9.07E-01 | no |
| Eya2          | 3.04  | 3.42  | 0.17  | 9.07E-01 | no |
| Tmem120a      | 6.03  | 6.73  | 0.16  | 9.07E-01 | no |
| Klhl18        | 6.06  | 6.54  | 0.11  | 9.07E-01 | no |
| Frs2          | 12.71 | 13.52 | 0.09  | 9.07E-01 | no |
| Gpd1l         | 56.77 | 59.98 | 0.08  | 9.07E-01 | no |
| Pomt2         | 5.41  | 5.00  | -0.12 | 9.07E-01 | no |
| Tnfrsf21      | 7.35  | 6.78  | -0.12 | 9.07E-01 | no |
| 9430038I01Rik | 3.42  | 3.01  | -0.18 | 9.07E-01 | no |
| Ocel1         | 7.90  | 8.67  | 0.13  | 9.07E-01 | no |
| Map3k4        | 17.17 | 18.18 | 0.08  | 9.07E-01 | no |
| Eri3          | 20.14 | 18.70 | -0.11 | 9.07E-01 | no |
| Arv1          | 6.76  | 7.52  | 0.15  | 9.08E-01 | no |
| Sdk1          | 0.22  | 0.25  | 0.21  | 9.08E-01 | no |
| Sh3glb1       | 26.01 | 24.53 | -0.08 | 9.08E-01 | no |
| Zfp655        | 18.15 | 19.21 | 0.08  | 9.08E-01 | no |
| Sel1l         | 17.97 | 18.89 | 0.07  | 9.08E-01 | no |
| Sdad1         | 18.13 | 17.11 | -0.08 | 9.08E-01 | no |
| Mobkl1a       | 11.76 | 10.89 | -0.11 | 9.08E-01 | no |
| Slc18a2       | 2.05  | 1.83  | -0.17 | 9.08E-01 | no |
| Rnf146        | 18.07 | 19.04 | 0.08  | 9.08E-01 | no |
| Nars2         | 3.81  | 4.19  | 0.14  | 9.08E-01 | no |

|              |       |       |       |          |    |
|--------------|-------|-------|-------|----------|----|
| Rufy2        | 11.71 | 12.41 | 0.08  | 9.08E-01 | no |
| Nadk         | 26.29 | 24.87 | -0.08 | 9.08E-01 | no |
| Bnip1        | 13.33 | 12.16 | -0.13 | 9.08E-01 | no |
| Batf2        | 0.12  | 0.07  | -0.71 | 9.08E-01 | no |
| Scn1a        | 0.01  | 0.00  | -1.37 | 9.09E-01 | no |
| Grk5         | 1.22  | 1.38  | 0.18  | 9.09E-01 | no |
| Maea         | 40.49 | 38.21 | -0.08 | 9.09E-01 | no |
| Zfp251       | 9.04  | 8.39  | -0.11 | 9.09E-01 | no |
| Arl15        | 5.91  | 5.40  | -0.13 | 9.09E-01 | no |
| Ebag9        | 10.57 | 9.63  | -0.13 | 9.09E-01 | no |
| Spaca5       | 0.23  | 0.12  | -0.96 | 9.09E-01 | no |
| Wnk4         | 0.35  | 0.41  | 0.22  | 9.09E-01 | no |
| Chid1        | 3.84  | 4.20  | 0.13  | 9.09E-01 | no |
| Kat2a        | 25.71 | 24.37 | -0.08 | 9.09E-01 | no |
| Olr1         | 0.06  | 0.03  | -0.72 | 9.09E-01 | no |
| Synpo2l      | 0.09  | 0.11  | 0.36  | 9.10E-01 | no |
| Ubr2         | 25.69 | 24.60 | -0.06 | 9.10E-01 | no |
| Sbds         | 24.38 | 22.71 | -0.10 | 9.10E-01 | no |
| Noxo1        | 1.57  | 1.78  | 0.18  | 9.10E-01 | no |
| Ctsw         | 0.28  | 0.36  | 0.37  | 9.10E-01 | no |
| Srp14        | 50.55 | 54.08 | 0.10  | 9.10E-01 | no |
| Adam12       | 0.02  | 0.01  | -0.79 | 9.10E-01 | no |
| Atxn10       | 31.23 | 33.13 | 0.09  | 9.10E-01 | no |
| Gal3st4      | 0.98  | 0.85  | -0.20 | 9.10E-01 | no |
| Pdcd10       | 17.64 | 16.31 | -0.11 | 9.10E-01 | no |
| Dock1        | 0.28  | 0.33  | 0.22  | 9.10E-01 | no |
| Arhgap29     | 0.33  | 0.28  | -0.23 | 9.10E-01 | no |
| Necap2       | 31.50 | 29.65 | -0.09 | 9.10E-01 | no |
| D11Wsu99e    | 16.51 | 15.42 | -0.10 | 9.10E-01 | no |
| Col10a1      | 0.03  | 0.05  | 0.82  | 9.11E-01 | no |
| Aggf1        | 22.74 | 21.44 | -0.08 | 9.11E-01 | no |
| Riok2        | 11.45 | 10.65 | -0.10 | 9.11E-01 | no |
| Sugt1        | 16.79 | 15.57 | -0.11 | 9.11E-01 | no |
| Gstm5        | 0.61  | 0.75  | 0.30  | 9.11E-01 | no |
| 2010107G23Ri | 0.05  | 0.09  | 0.91  | 9.11E-01 | no |
| Cdc42ep2     | 0.29  | 0.37  | 0.35  | 9.11E-01 | no |
| Dnajc4       | 7.07  | 7.91  | 0.16  | 9.11E-01 | no |
| Ift88        | 2.95  | 3.27  | 0.15  | 9.11E-01 | no |
| Rab2b        | 9.96  | 10.76 | 0.11  | 9.11E-01 | no |
| Srpr         | 26.49 | 24.98 | -0.08 | 9.11E-01 | no |
| Tmem189      | 18.89 | 17.58 | -0.10 | 9.11E-01 | no |
| Cdkal1       | 7.45  | 6.82  | -0.13 | 9.11E-01 | no |

|              |       |       |       |          |    |
|--------------|-------|-------|-------|----------|----|
| Ndufb4       | 21.31 | 19.23 | -0.15 | 9.11E-01 | no |
| Gpr21        | 0.50  | 0.42  | -0.26 | 9.11E-01 | no |
| Slc9a3r2     | 0.37  | 0.29  | -0.33 | 9.11E-01 | no |
| Fam18b       | 12.90 | 14.04 | 0.12  | 9.11E-01 | no |
| Wdr60        | 3.14  | 2.85  | -0.14 | 9.11E-01 | no |
| Erc6         | 8.12  | 8.62  | 0.09  | 9.11E-01 | no |
| Fam73b       | 5.48  | 5.94  | 0.12  | 9.12E-01 | no |
| Stat6        | 26.38 | 27.89 | 0.08  | 9.12E-01 | no |
| Kcnj16       | 0.05  | 0.03  | -0.72 | 9.12E-01 | no |
| Rexo4        | 27.05 | 25.48 | -0.09 | 9.12E-01 | no |
| Zfp46        | 6.36  | 6.85  | 0.11  | 9.12E-01 | no |
| Zfp113       | 6.80  | 7.28  | 0.10  | 9.12E-01 | no |
| Tbc1d5       | 10.40 | 11.06 | 0.09  | 9.12E-01 | no |
| Arhgap4      | 40.49 | 42.32 | 0.06  | 9.12E-01 | no |
| ORF61        | 35.88 | 33.87 | -0.08 | 9.12E-01 | no |
| Naa38        | 35.93 | 33.23 | -0.11 | 9.12E-01 | no |
| 5730455O13Ri | 11.83 | 10.82 | -0.13 | 9.12E-01 | no |
| Prdx6-ps1    | 0.91  | 0.79  | -0.20 | 9.12E-01 | no |
| Gulp1        | 0.05  | 0.02  | -0.91 | 9.12E-01 | no |
| Amhr2        | 0.05  | 0.09  | 0.70  | 9.12E-01 | no |
| Rps19-ps3    | 17.61 | 15.82 | -0.15 | 9.12E-01 | no |
| Snpc4        | 11.49 | 12.19 | 0.08  | 9.12E-01 | no |
| C030006K11Ri | 7.57  | 8.26  | 0.13  | 9.12E-01 | no |
| 1500015O10Ri | 0.10  | 0.17  | 0.81  | 9.12E-01 | no |
| Khl5         | 11.73 | 12.55 | 0.10  | 9.12E-01 | no |
| Zfp110       | 16.90 | 15.89 | -0.09 | 9.12E-01 | no |
| Apool        | 15.51 | 14.11 | -0.14 | 9.12E-01 | no |
| Siglec5      | 0.27  | 0.22  | -0.30 | 9.12E-01 | no |
| Fam164c      | 0.11  | 0.14  | 0.30  | 9.12E-01 | no |
| Nmnat1       | 3.61  | 4.08  | 0.18  | 9.12E-01 | no |
| Tgm1         | 0.08  | 0.06  | -0.53 | 9.12E-01 | no |
| Loxl3        | 0.91  | 1.71  | 0.91  | 9.12E-01 | no |
| Dkk3         | 0.79  | 0.91  | 0.21  | 9.13E-01 | no |
| Slc2a13      | 0.02  | 0.03  | 0.62  | 9.13E-01 | no |
| Tmem149      | 11.43 | 10.42 | -0.13 | 9.13E-01 | no |
| Rad9         | 32.93 | 31.02 | -0.09 | 9.13E-01 | no |
| Zfp90        | 5.64  | 6.17  | 0.13  | 9.13E-01 | no |
| Hbxip        | 23.43 | 25.43 | 0.12  | 9.13E-01 | no |
| Ppard        | 8.23  | 8.86  | 0.11  | 9.13E-01 | no |
| Pspc1        | 24.39 | 22.93 | -0.09 | 9.13E-01 | no |
| Mapkapk5     | 14.93 | 13.92 | -0.10 | 9.13E-01 | no |
| Siah1a       | 12.61 | 11.62 | -0.12 | 9.13E-01 | no |

|              |       |       |       |          |    |
|--------------|-------|-------|-------|----------|----|
| Trp53rk      | 3.11  | 2.83  | -0.13 | 9.13E-01 | no |
| Mlh1         | 14.04 | 13.09 | -0.10 | 9.13E-01 | no |
| Gatm         | 1.99  | 1.76  | -0.18 | 9.13E-01 | no |
| Pcbd1        | 0.34  | 0.46  | 0.44  | 9.14E-01 | no |
| Gm12581      | 0.06  | 0.10  | 0.64  | 9.14E-01 | no |
| Hddc2        | 11.81 | 13.05 | 0.14  | 9.14E-01 | no |
| Cnih4        | 6.54  | 7.11  | 0.12  | 9.14E-01 | no |
| Bin3         | 16.54 | 17.79 | 0.10  | 9.14E-01 | no |
| Akap8        | 40.98 | 38.85 | -0.08 | 9.14E-01 | no |
| Naa35        | 16.51 | 15.43 | -0.10 | 9.14E-01 | no |
| Tex261       | 28.55 | 26.69 | -0.10 | 9.14E-01 | no |
| Slc25a27     | 2.95  | 3.28  | 0.15  | 9.14E-01 | no |
| Zfp212       | 16.51 | 15.52 | -0.09 | 9.14E-01 | no |
| Clk4         | 31.59 | 29.70 | -0.09 | 9.14E-01 | no |
| D17Wsu104e   | 22.62 | 20.87 | -0.12 | 9.14E-01 | no |
| Sema4g       | 0.20  | 0.17  | -0.28 | 9.14E-01 | no |
| Acsl5        | 33.56 | 31.77 | -0.08 | 9.14E-01 | no |
| Acot11       | 1.89  | 2.08  | 0.14  | 9.14E-01 | no |
| Dnajc27      | 7.58  | 8.12  | 0.10  | 9.14E-01 | no |
| Fcf1         | 27.38 | 25.16 | -0.12 | 9.14E-01 | no |
| Msi1         | 0.05  | 0.09  | 0.85  | 9.14E-01 | no |
| lqch         | 0.03  | 0.05  | 0.68  | 9.14E-01 | no |
| Shisa2       | 0.39  | 0.46  | 0.22  | 9.14E-01 | no |
| 3830408C21Ri | 1.04  | 1.20  | 0.21  | 9.14E-01 | no |
| Tob1         | 6.44  | 7.05  | 0.13  | 9.14E-01 | no |
| A930005H10R  | 17.19 | 18.69 | 0.12  | 9.14E-01 | no |
| Fam50a       | 17.26 | 18.59 | 0.11  | 9.14E-01 | no |
| Ptdss1       | 13.95 | 14.87 | 0.09  | 9.14E-01 | no |
| Papd4        | 25.99 | 27.71 | 0.09  | 9.14E-01 | no |
| Fam40a       | 17.91 | 19.00 | 0.09  | 9.14E-01 | no |
| Irgq         | 14.53 | 15.36 | 0.08  | 9.14E-01 | no |
| Lcp1         | 92.20 | 87.47 | -0.08 | 9.14E-01 | no |
| Lats1        | 14.49 | 13.70 | -0.08 | 9.14E-01 | no |
| Tmem30a      | 29.98 | 28.35 | -0.08 | 9.14E-01 | no |
| Sumo3        | 37.36 | 35.32 | -0.08 | 9.14E-01 | no |
| St3gal1      | 10.65 | 10.02 | -0.09 | 9.14E-01 | no |
| Snx9         | 17.34 | 16.20 | -0.10 | 9.14E-01 | no |
| Fundc1       | 19.81 | 18.43 | -0.10 | 9.14E-01 | no |
| 5730437N04Ri | 28.50 | 26.43 | -0.11 | 9.14E-01 | no |
| 2900064A13Ri | 21.36 | 19.70 | -0.12 | 9.14E-01 | no |
| Bola1        | 10.43 | 9.40  | -0.15 | 9.14E-01 | no |
| Gm14137      | 1.50  | 1.34  | -0.17 | 9.14E-01 | no |

|              |       |       |       |          |    |
|--------------|-------|-------|-------|----------|----|
| Gm239        | 0.06  | 0.04  | -0.60 | 9.14E-01 | no |
| Fbxl21       | 0.12  | 0.08  | -0.61 | 9.14E-01 | no |
| Bcl2a1d      | 0.22  | 0.13  | -0.77 | 9.14E-01 | no |
| Lhfp1        | 0.30  | 0.38  | 0.31  | 9.15E-01 | no |
| Nlrp12       | 0.08  | 0.10  | 0.35  | 9.15E-01 | no |
| Fgd2         | 4.11  | 3.73  | -0.14 | 9.15E-01 | no |
| Ccnl2        | 42.13 | 39.90 | -0.08 | 9.15E-01 | no |
| Ankrd11      | 37.02 | 35.09 | -0.08 | 9.15E-01 | no |
| 9330175E14Ri | 2.80  | 2.48  | -0.17 | 9.15E-01 | no |
| Lrch4-sap25  | 36.65 | 34.73 | -0.08 | 9.15E-01 | no |
| Itgad        | 0.18  | 0.15  | -0.28 | 9.15E-01 | no |
| Cux2         | 0.01  | 0.02  | 0.93  | 9.16E-01 | no |
| Pate4        | 0.09  | 0.17  | 0.92  | 9.16E-01 | no |
| Zfp941       | 0.08  | 0.11  | 0.39  | 9.16E-01 | no |
| Fgfbp3       | 0.77  | 0.90  | 0.23  | 9.16E-01 | no |
| Cbx8         | 5.34  | 5.89  | 0.14  | 9.16E-01 | no |
| Kdelc1       | 6.82  | 7.45  | 0.13  | 9.16E-01 | no |
| Ttc21b       | 5.60  | 6.04  | 0.11  | 9.16E-01 | no |
| Scarb2       | 12.82 | 13.79 | 0.11  | 9.16E-01 | no |
| Phkg2        | 26.20 | 27.93 | 0.09  | 9.16E-01 | no |
| Ccdc9        | 20.09 | 21.31 | 0.08  | 9.16E-01 | no |
| Csnk1g1      | 10.21 | 10.82 | 0.08  | 9.16E-01 | no |
| Pogk         | 7.98  | 8.45  | 0.08  | 9.16E-01 | no |
| Dgcr2        | 33.37 | 31.87 | -0.07 | 9.16E-01 | no |
| Msr2         | 4.77  | 4.27  | -0.16 | 9.16E-01 | no |
| Hmga2        | 0.43  | 0.37  | -0.24 | 9.16E-01 | no |
| Chrm3        | 0.04  | 0.02  | -0.92 | 9.16E-01 | no |
| Cdh17        | 0.29  | 0.34  | 0.23  | 9.16E-01 | no |
| Ctsf         | 0.09  | 0.12  | 0.52  | 9.16E-01 | no |
| Camsap1      | 5.18  | 5.52  | 0.09  | 9.16E-01 | no |
| Lmbrd1       | 6.58  | 6.12  | -0.10 | 9.16E-01 | no |
| Tmem208      | 21.95 | 20.12 | -0.13 | 9.16E-01 | no |
| 1700049G17Ri | 2.72  | 2.47  | -0.14 | 9.16E-01 | no |
| Zfp688       | 9.08  | 8.23  | -0.14 | 9.16E-01 | no |
| Tomm40l      | 11.10 | 10.35 | -0.10 | 9.16E-01 | no |
| Mcpt8        | 0.25  | 0.35  | 0.49  | 9.16E-01 | no |
| Gm8300       | 0.05  | 0.01  | -2.33 | 9.16E-01 | no |
| Kdm4d        | 0.04  | 0.07  | 0.67  | 9.16E-01 | no |
| Mea1         | 20.67 | 22.37 | 0.11  | 9.16E-01 | no |
| Nudt19       | 15.47 | 16.62 | 0.10  | 9.16E-01 | no |
| Arf5         | 42.00 | 44.75 | 0.09  | 9.16E-01 | no |
| Zc3h3        | 12.68 | 13.50 | 0.09  | 9.16E-01 | no |

|              |        |        |       |          |    |
|--------------|--------|--------|-------|----------|----|
| Rab21        | 31.55  | 33.51  | 0.09  | 9.16E-01 | no |
| Fam134a      | 31.39  | 33.16  | 0.08  | 9.16E-01 | no |
| 2900097C17Ri | 57.94  | 55.05  | -0.07 | 9.16E-01 | no |
| Gm1821       | 198.45 | 188.40 | -0.08 | 9.16E-01 | no |
| Prkdc        | 10.26  | 9.73   | -0.08 | 9.16E-01 | no |
| Spata2       | 15.99  | 15.08  | -0.08 | 9.16E-01 | no |
| Eif3m        | 49.40  | 46.54  | -0.09 | 9.16E-01 | no |
| Vrk3         | 25.48  | 23.94  | -0.09 | 9.16E-01 | no |
| Nudt16l1     | 31.85  | 29.82  | -0.10 | 9.16E-01 | no |
| Fam108c      | 17.99  | 16.80  | -0.10 | 9.16E-01 | no |
| Prorsd1      | 7.20   | 6.59   | -0.13 | 9.16E-01 | no |
| Klra7        | 0.17   | 0.11   | -0.69 | 9.16E-01 | no |
| Gm2022       | 0.05   | 0.01   | -2.33 | 9.16E-01 | no |
| Cgn          | 0.02   | 0.04   | 0.56  | 9.16E-01 | no |
| Ifitm1       | 1.29   | 1.54   | 0.26  | 9.16E-01 | no |
| Nmb          | 2.14   | 2.46   | 0.20  | 9.16E-01 | no |
| Tmco3        | 2.71   | 2.97   | 0.13  | 9.16E-01 | no |
| Ppip5k1      | 7.88   | 8.39   | 0.09  | 9.16E-01 | no |
| Tmub2        | 20.95  | 22.29  | 0.09  | 9.16E-01 | no |
| Lztr1        | 14.26  | 15.17  | 0.09  | 9.16E-01 | no |
| Klhl25       | 11.39  | 12.09  | 0.09  | 9.16E-01 | no |
| BC006779     | 22.42  | 23.62  | 0.07  | 9.16E-01 | no |
| Pdzd8        | 25.05  | 23.78  | -0.07 | 9.16E-01 | no |
| Csnk1a1      | 68.16  | 64.67  | -0.08 | 9.16E-01 | no |
| Thumpd1      | 28.52  | 26.96  | -0.08 | 9.16E-01 | no |
| Gpx1         | 77.44  | 73.15  | -0.08 | 9.16E-01 | no |
| Clpx         | 15.49  | 14.56  | -0.09 | 9.16E-01 | no |
| Aifm1        | 21.87  | 20.54  | -0.09 | 9.16E-01 | no |
| Tyw1         | 11.53  | 10.80  | -0.10 | 9.16E-01 | no |
| Supt7l       | 11.83  | 11.02  | -0.10 | 9.16E-01 | no |
| Ovca2        | 11.05  | 10.26  | -0.11 | 9.16E-01 | no |
| Dcaf6        | 5.99   | 5.51   | -0.12 | 9.16E-01 | no |
| L1cam        | 0.45   | 0.40   | -0.19 | 9.16E-01 | no |
| Ttll13       | 0.14   | 0.11   | -0.34 | 9.16E-01 | no |
| Cct6b        | 0.12   | 0.08   | -0.53 | 9.16E-01 | no |
| Ect2l        | 0.04   | 0.03   | -0.74 | 9.16E-01 | no |
| Fa2h         | 0.05   | 0.03   | -0.90 | 9.16E-01 | no |
| Gm5662       | 0.05   | 0.01   | -2.31 | 9.16E-01 | no |
| Vps35        | 40.74  | 42.94  | 0.08  | 9.16E-01 | no |
| E230029C05Ri | 0.09   | 0.06   | -0.55 | 9.17E-01 | no |
| Gm2016       | 0.05   | 0.01   | -2.30 | 9.17E-01 | no |
| Lypla1       | 31.76  | 33.65  | 0.08  | 9.17E-01 | no |

|              |       |       |       |          |    |
|--------------|-------|-------|-------|----------|----|
| Vps13a       | 16.71 | 15.87 | -0.07 | 9.17E-01 | no |
| Brd9         | 23.16 | 21.84 | -0.08 | 9.17E-01 | no |
| Fam199x      | 4.22  | 4.53  | 0.10  | 9.18E-01 | no |
| Rpl37a       | 63.11 | 59.04 | -0.10 | 9.18E-01 | no |
| Vkorc1       | 8.00  | 7.16  | -0.16 | 9.18E-01 | no |
| Tnfsf11      | 0.76  | 0.65  | -0.22 | 9.18E-01 | no |
| 5730522E02Ri | 0.16  | 0.11  | -0.58 | 9.18E-01 | no |
| Sdr39u1      | 24.38 | 26.11 | 0.10  | 9.18E-01 | no |
| Bpil2        | 0.07  | 0.10  | 0.52  | 9.18E-01 | no |
| Slc35d2      | 0.90  | 1.05  | 0.21  | 9.18E-01 | no |
| Socs6        | 9.82  | 10.53 | 0.10  | 9.18E-01 | no |
| Uqcr10       | 51.30 | 47.54 | -0.11 | 9.18E-01 | no |
| Ccdc103      | 0.10  | 0.06  | -0.68 | 9.18E-01 | no |
| Cmtm2a       | 0.22  | 0.31  | 0.46  | 9.18E-01 | no |
| Sccpdh       | 4.78  | 4.32  | -0.15 | 9.18E-01 | no |
| Rpl19        | 67.53 | 63.82 | -0.08 | 9.18E-01 | no |
| Bcl2a1a      | 0.19  | 0.11  | -0.84 | 9.18E-01 | no |
| 4930417G10Ri | 0.16  | 0.13  | -0.35 | 9.18E-01 | no |
| Cldn19       | 0.03  | 0.05  | 0.58  | 9.18E-01 | no |
| Fbxl14       | 32.04 | 30.43 | -0.07 | 9.18E-01 | no |
| Pi4kb        | 20.14 | 19.05 | -0.08 | 9.18E-01 | no |
| Tatdn1       | 3.31  | 2.95  | -0.17 | 9.18E-01 | no |
| Vwa5b2       | 0.03  | 0.02  | -0.66 | 9.18E-01 | no |
| Pira4        | 0.08  | 0.03  | -1.62 | 9.18E-01 | no |
| Gas2l1       | 0.45  | 0.58  | 0.35  | 9.18E-01 | no |
| Kdr          | 0.27  | 0.31  | 0.21  | 9.18E-01 | no |
| Hps6         | 4.58  | 5.00  | 0.13  | 9.18E-01 | no |
| Akap10       | 14.14 | 13.31 | -0.09 | 9.18E-01 | no |
| Eral1        | 12.00 | 11.13 | -0.11 | 9.18E-01 | no |
| LOC100302626 | 0.68  | 0.57  | -0.25 | 9.18E-01 | no |
| Fam78b       | 0.13  | 0.11  | -0.30 | 9.18E-01 | no |
| Galnt9       | 0.11  | 0.07  | -0.59 | 9.19E-01 | no |
| Tnfaip2      | 0.50  | 0.57  | 0.20  | 9.19E-01 | no |
| 2610028E06Ri | 0.17  | 0.21  | 0.28  | 9.19E-01 | no |
| Slc26a6      | 1.41  | 1.57  | 0.16  | 9.19E-01 | no |
| Mamdc2       | 0.28  | 0.23  | -0.27 | 9.19E-01 | no |
| Fscn1        | 0.03  | 0.05  | 0.89  | 9.19E-01 | no |
| Fbxl18       | 4.04  | 4.42  | 0.13  | 9.19E-01 | no |
| Trmt6        | 18.11 | 17.04 | -0.09 | 9.19E-01 | no |
| Rabl2        | 5.56  | 5.05  | -0.14 | 9.19E-01 | no |
| Fdx1l        | 13.97 | 12.78 | -0.13 | 9.20E-01 | no |
| Zfp259       | 14.04 | 13.20 | -0.09 | 9.20E-01 | no |



|               |       |       |       |          |    |
|---------------|-------|-------|-------|----------|----|
| Fbxo2         | 0.06  | 0.10  | 0.81  | 9.20E-01 | no |
| Slc17a5       | 3.88  | 4.25  | 0.13  | 9.20E-01 | no |
| Sft2d3        | 6.79  | 6.25  | -0.12 | 9.20E-01 | no |
| Gm16523       | 0.29  | 0.24  | -0.23 | 9.20E-01 | no |
| BC005624      | 24.46 | 22.89 | -0.10 | 9.20E-01 | no |
| Ctse          | 8.17  | 7.53  | -0.12 | 9.20E-01 | no |
| Fam82a1       | 1.29  | 1.47  | 0.19  | 9.20E-01 | no |
| Srp54a        | 28.82 | 27.60 | -0.06 | 9.20E-01 | no |
| Wrn           | 17.97 | 17.10 | -0.07 | 9.20E-01 | no |
| Fkbpl         | 2.97  | 2.64  | -0.17 | 9.20E-01 | no |
| Zfp120        | 7.81  | 8.36  | 0.10  | 9.20E-01 | no |
| Tmem181b-ps   | 13.57 | 12.80 | -0.08 | 9.20E-01 | no |
| Slc10a5       | 0.04  | 0.02  | -0.90 | 9.20E-01 | no |
| Emid1         | 18.38 | 19.58 | 0.09  | 9.20E-01 | no |
| Nhlh1         | 0.03  | 0.06  | 0.89  | 9.20E-01 | no |
| Ttc26         | 2.04  | 1.84  | -0.15 | 9.20E-01 | no |
| Klc3          | 1.06  | 3.52  | 1.73  | 9.20E-01 | no |
| Nupl2         | 4.10  | 4.48  | 0.13  | 9.20E-01 | no |
| Tuft1         | 2.06  | 2.29  | 0.15  | 9.21E-01 | no |
| Zfp358        | 12.28 | 13.18 | 0.10  | 9.21E-01 | no |
| Gm16287       | 0.07  | 0.05  | -0.66 | 9.21E-01 | no |
| 4930548H24Ri  | 0.08  | 0.04  | -0.89 | 9.21E-01 | no |
| 1700020L24Ril | 0.49  | 0.59  | 0.29  | 9.21E-01 | no |
| Zfyve20       | 8.65  | 8.13  | -0.09 | 9.21E-01 | no |
| Cib1          | 26.06 | 28.04 | 0.11  | 9.21E-01 | no |
| Cramp1l       | 17.18 | 16.33 | -0.07 | 9.21E-01 | no |
| Rbbp6         | 39.95 | 38.24 | -0.06 | 9.21E-01 | no |
| Nln           | 7.61  | 7.08  | -0.10 | 9.21E-01 | no |
| Ube2q1        | 27.91 | 29.40 | 0.08  | 9.21E-01 | no |
| Sbf1          | 29.63 | 30.90 | 0.06  | 9.21E-01 | no |
| Eps15l1       | 30.59 | 29.29 | -0.06 | 9.21E-01 | no |
| Wbp7          | 25.84 | 24.59 | -0.07 | 9.21E-01 | no |
| Helz          | 18.36 | 17.45 | -0.07 | 9.21E-01 | no |
| Adprh         | 37.74 | 35.67 | -0.08 | 9.21E-01 | no |
| Tlr3          | 0.06  | 0.04  | -0.59 | 9.21E-01 | no |
| Acap2         | 21.02 | 22.12 | 0.07  | 9.21E-01 | no |
| Nsd1          | 29.30 | 27.86 | -0.07 | 9.21E-01 | no |
| Bola2         | 31.51 | 28.75 | -0.13 | 9.21E-01 | no |
| Tmem150c      | 0.03  | 0.05  | 0.88  | 9.21E-01 | no |
| C330007P06Ri  | 37.19 | 39.16 | 0.07  | 9.21E-01 | no |
| Cyp11a1       | 0.04  | 0.08  | 0.88  | 9.21E-01 | no |
| Alox5         | 0.11  | 0.14  | 0.36  | 9.21E-01 | no |

|               |       |       |       |          |    |
|---------------|-------|-------|-------|----------|----|
| Adam6a        | 0.22  | 0.27  | 0.29  | 9.21E-01 | no |
| Poln          | 0.72  | 0.82  | 0.19  | 9.21E-01 | no |
| Morn2         | 6.73  | 7.51  | 0.16  | 9.21E-01 | no |
| Tmem91        | 7.76  | 8.61  | 0.15  | 9.21E-01 | no |
| 2410075B13Ri  | 3.20  | 3.54  | 0.14  | 9.21E-01 | no |
| 1500012F01Ri  | 21.24 | 23.00 | 0.11  | 9.21E-01 | no |
| Nelf          | 6.10  | 6.54  | 0.10  | 9.21E-01 | no |
| Spred2        | 12.36 | 13.20 | 0.09  | 9.21E-01 | no |
| Dynlt3        | 21.79 | 23.18 | 0.09  | 9.21E-01 | no |
| Unk           | 23.12 | 24.35 | 0.08  | 9.21E-01 | no |
| Ubxn8         | 6.17  | 5.69  | -0.12 | 9.21E-01 | no |
| Tgds          | 7.86  | 7.24  | -0.12 | 9.21E-01 | no |
| Gm10825       | 0.49  | 0.43  | -0.20 | 9.21E-01 | no |
| Xlr3b         | 1.30  | 1.13  | -0.20 | 9.21E-01 | no |
| Cd200         | 0.62  | 0.53  | -0.23 | 9.21E-01 | no |
| Kcnc1         | 0.03  | 0.01  | -1.17 | 9.21E-01 | no |
| Pilrb2        | 0.07  | 0.10  | 0.59  | 9.21E-01 | no |
| Ccdc74a       | 0.70  | 0.82  | 0.22  | 9.21E-01 | no |
| Fhod1         | 14.21 | 13.42 | -0.08 | 9.21E-01 | no |
| Dnajc5        | 41.54 | 39.52 | -0.07 | 9.21E-01 | no |
| Naf1          | 10.53 | 11.27 | 0.10  | 9.21E-01 | no |
| Fam110a       | 25.31 | 26.80 | 0.08  | 9.21E-01 | no |
| Txndc17       | 15.53 | 14.37 | -0.11 | 9.21E-01 | no |
| 2900062L11Ril | 1.20  | 1.04  | -0.20 | 9.21E-01 | no |
| Pldn          | 14.10 | 13.27 | -0.09 | 9.22E-01 | no |
| Slfn2         | 11.45 | 10.58 | -0.11 | 9.22E-01 | no |
| Klhdc9        | 2.42  | 2.16  | -0.16 | 9.22E-01 | no |
| Dennd2a       | 0.04  | 0.06  | 0.46  | 9.22E-01 | no |
| Fndc8         | 0.04  | 0.07  | 0.87  | 9.22E-01 | no |
| Slc27a4       | 5.16  | 5.56  | 0.11  | 9.22E-01 | no |
| Chd4          | 66.84 | 63.55 | -0.07 | 9.22E-01 | no |
| Srp72         | 32.22 | 30.63 | -0.07 | 9.22E-01 | no |
| Nmt2          | 11.15 | 10.33 | -0.11 | 9.22E-01 | no |
| Fancf         | 6.89  | 6.30  | -0.13 | 9.22E-01 | no |
| 1190007I07Rik | 13.40 | 12.22 | -0.13 | 9.22E-01 | no |
| Slc39a7       | 35.70 | 34.04 | -0.07 | 9.22E-01 | no |
| Ggta1         | 19.76 | 18.77 | -0.07 | 9.22E-01 | no |
| Rrp7a         | 23.43 | 22.10 | -0.08 | 9.22E-01 | no |
| Snai1         | 0.16  | 0.12  | -0.48 | 9.22E-01 | no |
| Zbtb2         | 15.93 | 16.88 | 0.08  | 9.22E-01 | no |
| B4galt2       | 0.24  | 0.19  | -0.29 | 9.22E-01 | no |
| Smyd2         | 10.52 | 9.72  | -0.11 | 9.22E-01 | no |

|               |       |       |       |          |    |
|---------------|-------|-------|-------|----------|----|
| Slc9a8        | 15.61 | 14.83 | -0.07 | 9.23E-01 | no |
| Usp36         | 10.77 | 10.20 | -0.08 | 9.23E-01 | no |
| Thrsp         | 0.07  | 0.11  | 0.76  | 9.23E-01 | no |
| Etfdh         | 16.37 | 17.42 | 0.09  | 9.23E-01 | no |
| 7-Mar         | 27.73 | 26.27 | -0.08 | 9.23E-01 | no |
| Klhl28        | 11.22 | 10.46 | -0.10 | 9.23E-01 | no |
| Casc1         | 0.69  | 0.60  | -0.19 | 9.23E-01 | no |
| Lhfp12        | 0.07  | 0.05  | -0.45 | 9.23E-01 | no |
| Nt5m          | 9.52  | 8.74  | -0.12 | 9.23E-01 | no |
| 2810432L12Ril | 0.03  | 0.05  | 0.82  | 9.23E-01 | no |
| 2610008E11Ri  | 10.11 | 9.49  | -0.09 | 9.23E-01 | no |
| Pop5          | 17.13 | 15.82 | -0.12 | 9.23E-01 | no |
| Cd3d          | 0.06  | 0.11  | 0.86  | 9.23E-01 | no |
| Ankrd53       | 0.36  | 0.43  | 0.26  | 9.23E-01 | no |
| Ldlr          | 4.50  | 4.16  | -0.11 | 9.23E-01 | no |
| 2310061J03Ril | 3.18  | 3.54  | 0.15  | 9.24E-01 | no |
| Xpnpep2       | 0.02  | 0.04  | 0.86  | 9.24E-01 | no |
| Fads1         | 19.86 | 18.80 | -0.08 | 9.24E-01 | no |
| Abhd5         | 0.63  | 0.55  | -0.20 | 9.24E-01 | no |
| Zfp746        | 14.92 | 15.77 | 0.08  | 9.24E-01 | no |
| Tmem177       | 4.26  | 3.91  | -0.12 | 9.25E-01 | no |
| Nudt6         | 5.99  | 6.60  | 0.14  | 9.25E-01 | no |
| Trappc2l      | 19.35 | 21.07 | 0.12  | 9.25E-01 | no |
| Creb3         | 7.64  | 8.31  | 0.12  | 9.25E-01 | no |
| Rbm42         | 34.13 | 32.31 | -0.08 | 9.25E-01 | no |
| Uck1          | 29.22 | 27.65 | -0.08 | 9.25E-01 | no |
| Eif1a         | 20.00 | 18.87 | -0.08 | 9.25E-01 | no |
| Omg           | 0.11  | 0.07  | -0.57 | 9.25E-01 | no |
| Zmynd12       | 0.11  | 0.07  | -0.64 | 9.25E-01 | no |
| Gm949         | 0.03  | 0.05  | 1.02  | 9.25E-01 | no |
| Agxt2l2       | 6.54  | 7.12  | 0.12  | 9.25E-01 | no |
| Sars          | 34.02 | 35.90 | 0.08  | 9.25E-01 | no |
| Scyl1         | 18.03 | 17.04 | -0.08 | 9.25E-01 | no |
| Tfb2m         | 14.74 | 13.80 | -0.10 | 9.25E-01 | no |
| Klrb1c        | 2.81  | 2.52  | -0.16 | 9.25E-01 | no |
| Apobec4       | 0.23  | 0.18  | -0.38 | 9.25E-01 | no |
| 1700102P08Ri  | 1.04  | 0.89  | -0.22 | 9.25E-01 | no |
| Abi3          | 9.43  | 10.01 | 0.09  | 9.25E-01 | no |
| Hist1h4f      | 0.24  | 0.44  | 0.84  | 9.25E-01 | no |
| Ii5           | 0.06  | 0.10  | 0.85  | 9.25E-01 | no |
| 4933433P14Ri  | 8.33  | 8.96  | 0.11  | 9.25E-01 | no |
| Tmco4         | 11.96 | 11.25 | -0.09 | 9.25E-01 | no |

|                |       |       |       |          |    |
|----------------|-------|-------|-------|----------|----|
| Pvt1           | 0.86  | 0.76  | -0.18 | 9.25E-01 | no |
| 1700003M02R    | 0.05  | 0.09  | 0.73  | 9.25E-01 | no |
| Nlgn3          | 0.16  | 0.13  | -0.28 | 9.25E-01 | no |
| Gm1141         | 0.08  | 0.05  | -0.64 | 9.25E-01 | no |
| Cdk10          | 10.62 | 11.43 | 0.11  | 9.25E-01 | no |
| Psen1          | 23.10 | 21.90 | -0.08 | 9.25E-01 | no |
| Pde6g          | 0.17  | 0.11  | -0.64 | 9.25E-01 | no |
| Gp1ba          | 0.28  | 0.34  | 0.24  | 9.25E-01 | no |
| Zhx1           | 22.20 | 21.22 | -0.06 | 9.25E-01 | no |
| Gtf3c3         | 11.47 | 10.74 | -0.09 | 9.25E-01 | no |
| Timm13         | 23.61 | 22.11 | -0.09 | 9.25E-01 | no |
| Capn10         | 6.63  | 6.15  | -0.11 | 9.25E-01 | no |
| Dnali1         | 0.03  | 0.02  | -1.19 | 9.25E-01 | no |
| Fam115c        | 0.02  | 0.03  | 0.85  | 9.26E-01 | no |
| B4galnt1       | 12.85 | 13.66 | 0.09  | 9.26E-01 | no |
| 4930469G21Ri   | 0.09  | 0.04  | -1.16 | 9.26E-01 | no |
| Baz2b          | 19.38 | 20.35 | 0.07  | 9.26E-01 | no |
| Fam165b        | 21.74 | 19.92 | -0.13 | 9.26E-01 | no |
| Sumo1          | 98.05 | 93.28 | -0.07 | 9.26E-01 | no |
| Gm16515        | 13.68 | 12.95 | -0.08 | 9.26E-01 | no |
| Cplx1          | 0.04  | 0.06  | 0.85  | 9.26E-01 | no |
| Ccdc116        | 0.91  | 1.02  | 0.16  | 9.26E-01 | no |
| Rasa1          | 16.70 | 15.85 | -0.08 | 9.26E-01 | no |
| Dph5           | 8.00  | 7.34  | -0.12 | 9.26E-01 | no |
| Cd14           | 0.05  | 0.09  | 0.84  | 9.26E-01 | no |
| Nmbr           | 0.07  | 0.13  | 0.81  | 9.26E-01 | no |
| Sema3f         | 0.08  | 0.10  | 0.38  | 9.26E-01 | no |
| Fsd1l          | 0.17  | 0.21  | 0.26  | 9.26E-01 | no |
| Snx14          | 3.67  | 4.01  | 0.13  | 9.26E-01 | no |
| Fam174a        | 6.46  | 7.03  | 0.12  | 9.26E-01 | no |
| Cno            | 9.75  | 10.59 | 0.12  | 9.26E-01 | no |
| Ncoa7          | 8.09  | 8.61  | 0.09  | 9.26E-01 | no |
| 1600012H06Ri   | 14.17 | 15.07 | 0.09  | 9.26E-01 | no |
| Gne            | 14.96 | 14.16 | -0.08 | 9.26E-01 | no |
| Prdx5          | 35.44 | 33.09 | -0.10 | 9.26E-01 | no |
| Hist2h2aa1,His | 5.08  | 4.62  | -0.14 | 9.26E-01 | no |
| 1700037C18Ri   | 3.65  | 4.05  | 0.15  | 9.26E-01 | no |
| Med11          | 16.23 | 14.98 | -0.12 | 9.27E-01 | no |
| H60b           | 1.36  | 1.56  | 0.20  | 9.27E-01 | no |
| Slc38a2        | 63.10 | 66.16 | 0.07  | 9.27E-01 | no |
| Plscr3         | 45.83 | 47.68 | 0.06  | 9.27E-01 | no |
| Stx16          | 47.23 | 45.61 | -0.05 | 9.27E-01 | no |

|               |       |       |       |          |    |
|---------------|-------|-------|-------|----------|----|
| Egln2         | 31.99 | 30.37 | -0.07 | 9.27E-01 | no |
| Nprl2         | 11.82 | 10.94 | -0.11 | 9.27E-01 | no |
| Spic          | 0.10  | 0.05  | -0.85 | 9.27E-01 | no |
| Slc6a19       | 0.19  | 0.23  | 0.30  | 9.27E-01 | no |
| Commd4        | 30.32 | 32.42 | 0.10  | 9.27E-01 | no |
| Ppp2ca        | 73.77 | 70.34 | -0.07 | 9.27E-01 | no |
| Uso1          | 21.79 | 20.71 | -0.07 | 9.27E-01 | no |
| Zfp787        | 13.72 | 12.83 | -0.10 | 9.27E-01 | no |
| Rps13         | 27.85 | 25.71 | -0.12 | 9.27E-01 | no |
| Tmed3         | 10.56 | 9.73  | -0.12 | 9.27E-01 | no |
| Abca9         | 0.14  | 0.12  | -0.23 | 9.27E-01 | no |
| Klrb1b        | 0.17  | 0.13  | -0.40 | 9.27E-01 | no |
| Gje1          | 0.09  | 0.05  | -0.80 | 9.27E-01 | no |
| Btbd17        | 0.04  | 0.06  | 0.76  | 9.27E-01 | no |
| Cadm3         | 0.02  | 0.04  | 0.72  | 9.27E-01 | no |
| Gypc          | 16.26 | 15.28 | -0.09 | 9.27E-01 | no |
| Hist1h3c      | 1.20  | 1.43  | 0.25  | 9.28E-01 | no |
| Pacs1         | 10.00 | 10.58 | 0.08  | 9.28E-01 | no |
| Ndufb10       | 46.17 | 43.33 | -0.09 | 9.28E-01 | no |
| Mapksp1       | 27.18 | 25.49 | -0.09 | 9.28E-01 | no |
| Dynlt1e       | 5.29  | 4.85  | -0.13 | 9.28E-01 | no |
| Jsrp1         | 0.05  | 0.09  | 0.73  | 9.28E-01 | no |
| Hoxa2         | 0.07  | 0.11  | 0.57  | 9.28E-01 | no |
| Tssk2         | 0.09  | 0.13  | 0.52  | 9.28E-01 | no |
| 4833422C13Ri  | 0.14  | 0.19  | 0.42  | 9.28E-01 | no |
| Oxtr          | 0.05  | 0.06  | 0.40  | 9.28E-01 | no |
| AA543186      | 0.56  | 0.65  | 0.21  | 9.28E-01 | no |
| Qsox2         | 3.94  | 4.31  | 0.13  | 9.28E-01 | no |
| Tm2d3         | 11.31 | 12.32 | 0.12  | 9.28E-01 | no |
| Uros          | 7.23  | 7.84  | 0.12  | 9.28E-01 | no |
| 2810422J05RiI | 20.13 | 21.49 | 0.09  | 9.28E-01 | no |
| Zdhhc17       | 9.59  | 10.18 | 0.09  | 9.28E-01 | no |
| 2610018G03Ri  | 23.25 | 24.65 | 0.08  | 9.28E-01 | no |
| Cog5          | 14.75 | 15.63 | 0.08  | 9.28E-01 | no |
| Znrf2         | 17.43 | 18.48 | 0.08  | 9.28E-01 | no |
| Ddx3x         | 82.88 | 79.07 | -0.07 | 9.28E-01 | no |
| Hipk1         | 48.77 | 46.52 | -0.07 | 9.28E-01 | no |
| Magt1         | 26.34 | 25.05 | -0.07 | 9.28E-01 | no |
| Orc4          | 16.16 | 15.32 | -0.08 | 9.28E-01 | no |
| Zdhhc7        | 20.58 | 19.50 | -0.08 | 9.28E-01 | no |
| Cand2         | 7.42  | 7.00  | -0.08 | 9.28E-01 | no |
| Nup54         | 15.72 | 14.78 | -0.09 | 9.28E-01 | no |

|              |       |       |       |          |    |
|--------------|-------|-------|-------|----------|----|
| Ccdc104      | 14.22 | 13.23 | -0.10 | 9.28E-01 | no |
| Fdft1        | 7.68  | 7.15  | -0.10 | 9.28E-01 | no |
| Mrps16       | 36.33 | 33.74 | -0.11 | 9.28E-01 | no |
| 2810008D09Ri | 15.57 | 14.25 | -0.13 | 9.28E-01 | no |
| Gm3604       | 3.06  | 2.78  | -0.14 | 9.28E-01 | no |
| Ubxn11       | 3.85  | 3.49  | -0.14 | 9.28E-01 | no |
| 1810010D01Ri | 0.25  | 0.18  | -0.45 | 9.28E-01 | no |
| Slc24a5      | 5.82  | 3.22  | -0.85 | 9.28E-01 | no |
| Cntd1        | 4.74  | 2.55  | -0.90 | 9.28E-01 | no |
| Itpr2        | 13.76 | 14.37 | 0.06  | 9.28E-01 | no |
| Lyz2         | 34.64 | 36.78 | 0.09  | 9.28E-01 | no |
| Sox4         | 54.90 | 57.51 | 0.07  | 9.28E-01 | no |
| Efha1        | 23.81 | 22.54 | -0.08 | 9.28E-01 | no |
| 9330129D05Ri | 1.93  | 2.14  | 0.15  | 9.28E-01 | no |
| Meg3         | 0.03  | 0.06  | 0.82  | 9.28E-01 | no |
| Ttc33        | 19.20 | 20.42 | 0.09  | 9.28E-01 | no |
| Tnks2        | 36.77 | 38.51 | 0.07  | 9.28E-01 | no |
| Brd2         | 57.09 | 55.07 | -0.05 | 9.28E-01 | no |
| Coq3         | 2.68  | 2.43  | -0.14 | 9.28E-01 | no |
| Galr3        | 0.07  | 0.03  | -1.18 | 9.28E-01 | no |
| Atp5j        | 40.00 | 42.55 | 0.09  | 9.29E-01 | no |
| Daxx         | 26.05 | 27.29 | 0.07  | 9.29E-01 | no |
| Rab38        | 0.09  | 0.05  | -0.84 | 9.29E-01 | no |
| Abhd16a      | 13.72 | 14.63 | 0.09  | 9.29E-01 | no |
| Catsper3     | 0.10  | 0.06  | -0.83 | 9.29E-01 | no |
| 4933411K20Ri | 13.20 | 13.93 | 0.08  | 9.29E-01 | no |
| Srebf1       | 23.61 | 24.78 | 0.07  | 9.30E-01 | no |
| Zfp612       | 0.11  | 0.13  | 0.27  | 9.30E-01 | no |
| Ripk4        | 0.03  | 0.02  | -0.83 | 9.30E-01 | no |
| Adam21       | 0.03  | 0.06  | 0.82  | 9.30E-01 | no |
| Mogat2       | 0.05  | 0.08  | 0.74  | 9.30E-01 | no |
| Hsd11b2      | 0.07  | 0.10  | 0.56  | 9.30E-01 | no |
| Ebf4         | 0.05  | 0.08  | 0.50  | 9.30E-01 | no |
| Apln         | 0.11  | 0.14  | 0.34  | 9.30E-01 | no |
| Zfp524       | 7.76  | 8.47  | 0.13  | 9.30E-01 | no |
| Heatr2       | 14.70 | 15.51 | 0.08  | 9.30E-01 | no |
| Sik3         | 13.73 | 14.42 | 0.07  | 9.30E-01 | no |
| Usp8         | 24.54 | 23.39 | -0.07 | 9.30E-01 | no |
| Txndc9       | 11.28 | 10.67 | -0.08 | 9.30E-01 | no |
| Tnks1bp1     | 5.99  | 5.65  | -0.08 | 9.30E-01 | no |
| Mier2        | 10.81 | 10.14 | -0.09 | 9.30E-01 | no |
| Yod1         | 6.88  | 6.40  | -0.10 | 9.30E-01 | no |

|              |       |       |       |          |    |
|--------------|-------|-------|-------|----------|----|
| Odf2l        | 10.13 | 9.51  | -0.09 | 9.30E-01 | no |
| Car15        | 2.03  | 2.28  | 0.17  | 9.30E-01 | no |
| Eml3         | 21.21 | 20.16 | -0.07 | 9.30E-01 | no |
| Exoc3        | 13.83 | 14.56 | 0.07  | 9.31E-01 | no |
| Spsb3        | 27.56 | 28.91 | 0.07  | 9.31E-01 | no |
| Vmn2r87      | 0.02  | 0.05  | 0.99  | 9.31E-01 | no |
| Acy1         | 5.90  | 6.44  | 0.13  | 9.31E-01 | no |
| Ccdc94       | 9.31  | 10.05 | 0.11  | 9.31E-01 | no |
| Ero1l        | 9.68  | 10.33 | 0.09  | 9.31E-01 | no |
| Gpank1       | 16.20 | 15.19 | -0.09 | 9.31E-01 | no |
| Cmtm6        | 29.28 | 27.88 | -0.07 | 9.31E-01 | no |
| Epas1        | 0.25  | 0.28  | 0.19  | 9.31E-01 | no |
| Ebp          | 15.80 | 14.79 | -0.10 | 9.32E-01 | no |
| Mapk11       | 4.33  | 3.98  | -0.12 | 9.32E-01 | no |
| Bat3         | 44.50 | 42.53 | -0.07 | 9.32E-01 | no |
| C330019G07Ri | 17.46 | 16.68 | -0.07 | 9.32E-01 | no |
| Scamp3       | 30.50 | 28.84 | -0.08 | 9.32E-01 | no |
| Tm2d1        | 6.53  | 7.20  | 0.14  | 9.32E-01 | no |
| Rpl29        | 3.89  | 3.48  | -0.16 | 9.32E-01 | no |
| Hist1h4k     | 0.28  | 0.46  | 0.73  | 9.32E-01 | no |
| Nr2c2ap      | 9.18  | 10.22 | 0.15  | 9.32E-01 | no |
| Wdr44        | 5.20  | 5.58  | 0.10  | 9.32E-01 | no |
| Gpr172b      | 7.95  | 8.52  | 0.10  | 9.32E-01 | no |
| Mms19        | 20.94 | 19.94 | -0.07 | 9.32E-01 | no |
| Tarsl2       | 3.43  | 3.15  | -0.12 | 9.32E-01 | no |
| Al450353     | 5.65  | 5.14  | -0.13 | 9.32E-01 | no |
| 8430429K09Ri | 1.85  | 1.64  | -0.18 | 9.32E-01 | no |
| Hist1h2ae    | 0.83  | 0.98  | 0.24  | 9.32E-01 | no |
| 1700066B19Ri | 0.30  | 0.35  | 0.22  | 9.32E-01 | no |
| Pkdcc        | 0.09  | 0.12  | 0.37  | 9.32E-01 | no |
| D14Ert449e   | 19.13 | 18.26 | -0.07 | 9.33E-01 | no |
| 4732418C07Ri | 14.59 | 13.85 | -0.08 | 9.33E-01 | no |
| Muc6         | 0.02  | 0.03  | 0.46  | 9.33E-01 | no |
| Ccdc64b      | 0.03  | 0.06  | 0.82  | 9.33E-01 | no |
| Pigr         | 0.28  | 0.32  | 0.20  | 9.33E-01 | no |
| Syp          | 0.49  | 0.56  | 0.19  | 9.33E-01 | no |
| Pion         | 2.80  | 3.06  | 0.13  | 9.33E-01 | no |
| Zfp54        | 4.28  | 4.65  | 0.12  | 9.33E-01 | no |
| 4930455F23Ri | 6.78  | 7.33  | 0.11  | 9.33E-01 | no |
| Dnalc4       | 13.56 | 14.52 | 0.10  | 9.33E-01 | no |
| Tbc1d25      | 8.56  | 9.14  | 0.10  | 9.33E-01 | no |
| Anapc16      | 22.38 | 23.80 | 0.09  | 9.33E-01 | no |

|                |       |       |       |          |    |
|----------------|-------|-------|-------|----------|----|
| Tmem68         | 11.74 | 10.97 | -0.10 | 9.33E-01 | no |
| Zdhhc14        | 7.05  | 6.58  | -0.10 | 9.33E-01 | no |
| Usp46          | 5.59  | 5.18  | -0.11 | 9.33E-01 | no |
| Zmynd17        | 5.26  | 4.82  | -0.13 | 9.33E-01 | no |
| Rasd2          | 0.06  | 0.04  | -0.60 | 9.33E-01 | no |
| Izumo1         | 0.08  | 0.05  | -0.81 | 9.33E-01 | no |
| Dynlt1c,Dynlt1 | 0.03  | 0.26  | 3.23  | 9.33E-01 | no |
| Jph4           | 0.02  | 0.03  | 0.72  | 9.33E-01 | no |
| Soat2          | 0.11  | 0.15  | 0.39  | 9.33E-01 | no |
| Magee1         | 2.01  | 2.21  | 0.13  | 9.33E-01 | no |
| Usp18          | 5.47  | 5.96  | 0.12  | 9.33E-01 | no |
| Gpatch3        | 5.63  | 6.09  | 0.11  | 9.33E-01 | no |
| Foxo1          | 40.97 | 42.91 | 0.07  | 9.33E-01 | no |
| Cep350         | 17.69 | 16.92 | -0.06 | 9.33E-01 | no |
| Agpat1         | 30.56 | 29.18 | -0.07 | 9.33E-01 | no |
| Map2k2         | 26.75 | 25.46 | -0.07 | 9.33E-01 | no |
| C030046I01Rik  | 36.41 | 34.62 | -0.07 | 9.33E-01 | no |
| Ranbp6         | 14.65 | 13.92 | -0.07 | 9.33E-01 | no |
| E4f1           | 13.88 | 13.10 | -0.08 | 9.33E-01 | no |
| Mrpl32         | 22.00 | 20.42 | -0.11 | 9.33E-01 | no |
| Ift74          | 4.49  | 4.12  | -0.12 | 9.33E-01 | no |
| Mkrn3          | 0.44  | 0.38  | -0.22 | 9.33E-01 | no |
| 5730422E09Ri   | 0.17  | 0.12  | -0.42 | 9.33E-01 | no |
| Synm           | 0.02  | 0.02  | -0.53 | 9.33E-01 | no |
| Jag1           | 0.03  | 0.01  | -0.79 | 9.33E-01 | no |
| Tmem63c        | 0.04  | 0.02  | -0.81 | 9.33E-01 | no |
| Efna4          | 1.20  | 1.36  | 0.17  | 9.33E-01 | no |
| Alpl           | 22.12 | 21.00 | -0.07 | 9.33E-01 | no |
| Zfp276         | 9.94  | 9.43  | -0.08 | 9.33E-01 | no |
| Acaa1b         | 5.06  | 5.51  | 0.12  | 9.33E-01 | no |
| Elf1           | 59.07 | 56.49 | -0.06 | 9.33E-01 | no |
| Htr1b          | 0.08  | 0.13  | 0.72  | 9.33E-01 | no |
| Arhgef4        | 1.18  | 1.31  | 0.15  | 9.33E-01 | no |
| Taok3          | 18.21 | 19.02 | 0.06  | 9.33E-01 | no |
| Lcn4           | 0.29  | 0.38  | 0.40  | 9.33E-01 | no |
| Zscan2         | 5.99  | 6.46  | 0.11  | 9.34E-01 | no |
| Plcd4          | 0.08  | 0.10  | 0.40  | 9.34E-01 | no |
| Raph1          | 0.47  | 0.54  | 0.20  | 9.34E-01 | no |
| Pecr           | 2.50  | 2.78  | 0.16  | 9.34E-01 | no |
| Tbc1d23        | 9.04  | 9.60  | 0.09  | 9.34E-01 | no |
| Slc38a9        | 9.03  | 9.48  | 0.07  | 9.34E-01 | no |
| Midn           | 27.06 | 25.83 | -0.07 | 9.34E-01 | no |



|              |        |        |       |          |    |
|--------------|--------|--------|-------|----------|----|
| Clec7a       | 0.61   | 0.53   | -0.21 | 9.34E-01 | no |
| Ccdc8        | 0.28   | 0.33   | 0.23  | 9.34E-01 | no |
| Hfm1         | 0.22   | 0.26   | 0.22  | 9.34E-01 | no |
| Mocs3        | 6.60   | 7.15   | 0.11  | 9.34E-01 | no |
| Sec62        | 18.11  | 19.03  | 0.07  | 9.34E-01 | no |
| Gmip         | 25.56  | 24.41  | -0.07 | 9.34E-01 | no |
| Mrps21       | 63.35  | 59.40  | -0.09 | 9.34E-01 | no |
| Zfp472       | 11.05  | 10.34  | -0.10 | 9.34E-01 | no |
| Cwc22        | 3.22   | 2.96   | -0.12 | 9.34E-01 | no |
| Taf4b        | 3.40   | 3.66   | 0.10  | 9.34E-01 | no |
| Myl6         | 73.13  | 69.27  | -0.08 | 9.34E-01 | no |
| Taco1        | 13.83  | 12.89  | -0.10 | 9.34E-01 | no |
| Klre1        | 0.16   | 0.09   | -0.79 | 9.35E-01 | no |
| 4831440E17Ri | 0.75   | 0.84   | 0.16  | 9.35E-01 | no |
| Mbd6         | 36.54  | 38.20  | 0.06  | 9.35E-01 | no |
| Adamts10     | 12.19  | 11.56  | -0.08 | 9.35E-01 | no |
| Map3k13      | 0.25   | 0.22   | -0.18 | 9.35E-01 | no |
| Tsc22d4      | 58.60  | 61.25  | 0.06  | 9.35E-01 | no |
| Six5         | 0.23   | 0.26   | 0.23  | 9.35E-01 | no |
| Dtnb         | 9.95   | 10.55  | 0.08  | 9.35E-01 | no |
| Actl7a       | 0.14   | 0.10   | -0.47 | 9.35E-01 | no |
| Hist1h4j     | 0.75   | 0.55   | -0.47 | 9.35E-01 | no |
| Rps11        | 235.92 | 246.56 | 0.06  | 9.35E-01 | no |
| Zfp72        | 2.32   | 2.58   | 0.15  | 9.36E-01 | no |
| Adipor1      | 31.81  | 33.42  | 0.07  | 9.36E-01 | no |
| Lrrc1        | 6.66   | 6.22   | -0.10 | 9.36E-01 | no |
| Muc2         | 0.01   | 0.02   | 0.70  | 9.36E-01 | no |
| Ube2b        | 32.35  | 34.02  | 0.07  | 9.36E-01 | no |
| Sdc4         | 57.84  | 55.32  | -0.06 | 9.36E-01 | no |
| Ganc         | 5.53   | 5.18   | -0.09 | 9.36E-01 | no |
| Fgfrl1       | 2.63   | 2.40   | -0.13 | 9.36E-01 | no |
| Apon         | 0.69   | 0.60   | -0.21 | 9.36E-01 | no |
| C130050O18R  | 0.98   | 2.04   | 1.06  | 9.36E-01 | no |
| Arpc5        | 92.86  | 97.05  | 0.06  | 9.36E-01 | no |
| Qser1        | 19.85  | 18.99  | -0.06 | 9.36E-01 | no |
| Rrs1         | 30.46  | 29.01  | -0.07 | 9.36E-01 | no |
| Stx2         | 8.20   | 7.69   | -0.09 | 9.36E-01 | no |
| Sstr4        | 0.07   | 0.11   | 0.66  | 9.36E-01 | no |
| Gm4013       | 1.03   | 1.26   | 0.29  | 9.36E-01 | no |
| Dolk         | 5.74   | 6.21   | 0.11  | 9.36E-01 | no |
| Frmd8        | 25.81  | 24.64  | -0.07 | 9.36E-01 | no |
| Edc3         | 21.00  | 20.01  | -0.07 | 9.36E-01 | no |

|               |       |       |       |          |    |
|---------------|-------|-------|-------|----------|----|
| 2010111I01Rik | 4.78  | 4.44  | -0.10 | 9.36E-01 | no |
| 1500015A07Ri  | 4.52  | 4.93  | 0.13  | 9.36E-01 | no |
| Tmem190       | 0.13  | 0.22  | 0.77  | 9.36E-01 | no |
| Esrp2         | 0.03  | 0.05  | 0.70  | 9.36E-01 | no |
| Cald1         | 0.02  | 0.04  | 0.66  | 9.36E-01 | no |
| Gnb3          | 0.09  | 0.12  | 0.44  | 9.36E-01 | no |
| 2610306M01R   | 2.47  | 2.74  | 0.15  | 9.36E-01 | no |
| Gm7102        | 3.23  | 3.55  | 0.13  | 9.36E-01 | no |
| Plcb3         | 5.70  | 6.06  | 0.09  | 9.36E-01 | no |
| Arid4a        | 14.99 | 15.71 | 0.07  | 9.36E-01 | no |
| Fam65a        | 44.49 | 46.50 | 0.06  | 9.36E-01 | no |
| Elmo1         | 54.11 | 52.19 | -0.05 | 9.36E-01 | no |
| Copa          | 48.23 | 46.19 | -0.06 | 9.36E-01 | no |
| Rbm25         | 43.25 | 41.42 | -0.06 | 9.36E-01 | no |
| Gpbp1l1       | 34.67 | 33.14 | -0.06 | 9.36E-01 | no |
| 2310036O22Ri  | 56.89 | 54.11 | -0.07 | 9.36E-01 | no |
| Snx6          | 28.93 | 27.46 | -0.08 | 9.36E-01 | no |
| Btbd2         | 11.31 | 10.67 | -0.08 | 9.36E-01 | no |
| Acadvl        | 14.39 | 13.57 | -0.08 | 9.36E-01 | no |
| Cnnm4         | 6.98  | 6.58  | -0.08 | 9.36E-01 | no |
| 5133401N09Ri  | 12.60 | 11.76 | -0.10 | 9.36E-01 | no |
| Lactb2        | 9.12  | 8.47  | -0.11 | 9.36E-01 | no |
| Nicn1         | 5.04  | 4.65  | -0.12 | 9.36E-01 | no |
| Hist4h4       | 1.19  | 0.95  | -0.32 | 9.36E-01 | no |
| Klrg2         | 0.07  | 0.05  | -0.56 | 9.36E-01 | no |
| Smad9         | 0.02  | 0.01  | -0.78 | 9.36E-01 | no |
| AI837181      | 22.08 | 23.32 | 0.08  | 9.36E-01 | no |
| Trim17        | 0.49  | 0.43  | -0.21 | 9.36E-01 | no |
| Shprh         | 12.78 | 13.34 | 0.06  | 9.37E-01 | no |
| Trib1         | 4.52  | 4.22  | -0.10 | 9.37E-01 | no |
| Sos2          | 10.53 | 10.01 | -0.07 | 9.37E-01 | no |
| Ephx2         | 0.06  | 0.09  | 0.52  | 9.37E-01 | no |
| Wdr20b        | 2.15  | 1.95  | -0.14 | 9.37E-01 | no |
| D8Ert82e      | 0.76  | 0.69  | -0.14 | 9.37E-01 | no |
| Spry2         | 7.87  | 8.45  | 0.10  | 9.37E-01 | no |
| Tcfec         | 0.21  | 0.17  | -0.33 | 9.37E-01 | no |
| Ms4a2         | 0.14  | 0.08  | -0.77 | 9.37E-01 | no |
| Samd4b        | 16.27 | 15.52 | -0.07 | 9.37E-01 | no |
| Herc2         | 15.97 | 16.67 | 0.06  | 9.37E-01 | no |
| Fscn2         | 0.07  | 0.04  | -0.62 | 9.37E-01 | no |
| Best1         | 0.06  | 0.09  | 0.52  | 9.37E-01 | no |
| P2rx1         | 0.12  | 0.15  | 0.34  | 9.37E-01 | no |

|              |        |        |       |          |    |
|--------------|--------|--------|-------|----------|----|
| Fam83e       | 0.08   | 0.11   | 0.31  | 9.37E-01 | no |
| Bex1         | 1.37   | 1.56   | 0.18  | 9.37E-01 | no |
| Chchd8       | 8.70   | 9.47   | 0.12  | 9.37E-01 | no |
| Lrfn4        | 2.78   | 3.02   | 0.12  | 9.37E-01 | no |
| 2410003K15Ri | 10.87  | 11.79  | 0.12  | 9.37E-01 | no |
| Slc37a1      | 8.38   | 8.92   | 0.09  | 9.37E-01 | no |
| Carkd        | 16.13  | 17.13  | 0.09  | 9.37E-01 | no |
| Ubr3         | 14.26  | 13.69  | -0.06 | 9.37E-01 | no |
| Nfkb1        | 28.67  | 27.43  | -0.06 | 9.37E-01 | no |
| Rps9         | 833.40 | 796.06 | -0.07 | 9.37E-01 | no |
| Phf20        | 13.04  | 12.44  | -0.07 | 9.37E-01 | no |
| Wdr4         | 11.08  | 10.51  | -0.08 | 9.37E-01 | no |
| Wdr92        | 7.05   | 6.60   | -0.09 | 9.37E-01 | no |
| Zscan22      | 8.07   | 7.55   | -0.10 | 9.37E-01 | no |
| D130043K22Ri | 0.03   | 0.02   | -0.57 | 9.37E-01 | no |
| Stau1        | 22.98  | 23.95  | 0.06  | 9.37E-01 | no |
| Zmat4        | 0.03   | 0.05   | 0.52  | 9.37E-01 | no |
| Zbtb49       | 5.24   | 5.62   | 0.10  | 9.37E-01 | no |
| Atp2c1       | 13.05  | 12.42  | -0.07 | 9.37E-01 | no |
| Zfp607       | 7.73   | 7.25   | -0.09 | 9.37E-01 | no |
| Gdpd3        | 3.03   | 2.73   | -0.15 | 9.37E-01 | no |
| Slc7a7       | 6.82   | 7.33   | 0.10  | 9.37E-01 | no |
| Agrp         | 0.40   | 0.30   | -0.40 | 9.37E-01 | no |
| Bdkrb1       | 0.05   | 0.08   | 0.69  | 9.37E-01 | no |
| Aldh1l2      | 0.08   | 0.09   | 0.26  | 9.37E-01 | no |
| Lmbrd2       | 10.93  | 10.28  | -0.09 | 9.37E-01 | no |
| 9330133O14Ri | 1.99   | 2.19   | 0.14  | 9.37E-01 | no |
| Jrk          | 3.45   | 3.72   | 0.11  | 9.37E-01 | no |
| Pkn2         | 18.23  | 17.43  | -0.06 | 9.37E-01 | no |
| Fdxr         | 9.95   | 9.31   | -0.10 | 9.37E-01 | no |
| Nubpl        | 4.39   | 3.99   | -0.14 | 9.37E-01 | no |
| Pim3         | 10.41  | 9.79   | -0.09 | 9.37E-01 | no |
| Mapkapk2     | 51.77  | 54.06  | 0.06  | 9.37E-01 | no |
| Rgs11        | 0.07   | 0.10   | 0.49  | 9.37E-01 | no |
| Gm10389      | 0.07   | 0.09   | 0.38  | 9.37E-01 | no |
| Cdk14        | 0.18   | 0.21   | 0.21  | 9.37E-01 | no |
| Ccdc106      | 0.39   | 0.45   | 0.21  | 9.37E-01 | no |
| Cd302        | 1.34   | 1.52   | 0.17  | 9.37E-01 | no |
| Ctxn1        | 1.75   | 1.96   | 0.16  | 9.37E-01 | no |
| Cbr4         | 6.30   | 6.87   | 0.13  | 9.37E-01 | no |
| Mmab         | 10.21  | 10.81  | 0.08  | 9.37E-01 | no |
| Slc48a1      | 22.35  | 23.47  | 0.07  | 9.37E-01 | no |

|              |       |       |       |          |    |
|--------------|-------|-------|-------|----------|----|
| Chkb         | 26.20 | 27.51 | 0.07  | 9.37E-01 | no |
| Rela         | 24.58 | 25.75 | 0.07  | 9.37E-01 | no |
| Stk17b       | 35.30 | 36.90 | 0.06  | 9.37E-01 | no |
| Man1a2       | 15.78 | 15.10 | -0.06 | 9.37E-01 | no |
| Exoc5        | 19.09 | 18.23 | -0.07 | 9.37E-01 | no |
| Slc35a5      | 6.66  | 6.24  | -0.09 | 9.37E-01 | no |
| Nme6         | 11.89 | 11.03 | -0.11 | 9.37E-01 | no |
| Adam15       | 2.44  | 2.24  | -0.13 | 9.37E-01 | no |
| Chrn2        | 0.45  | 0.40  | -0.16 | 9.37E-01 | no |
| Sh3d20       | 1.31  | 1.17  | -0.17 | 9.37E-01 | no |
| Hist1h4a     | 0.59  | 0.41  | -0.52 | 9.37E-01 | no |
| Zfp691       | 4.20  | 4.55  | 0.12  | 9.37E-01 | no |
| 2210417A02Ri | 0.13  | 0.21  | 0.68  | 9.37E-01 | no |
| Nr3c2        | 0.05  | 0.06  | 0.43  | 9.37E-01 | no |
| Trim47       | 0.23  | 0.27  | 0.26  | 9.37E-01 | no |
| Hopx         | 4.78  | 5.26  | 0.14  | 9.37E-01 | no |
| Tmc4         | 2.07  | 2.26  | 0.13  | 9.37E-01 | no |
| Acot10       | 6.92  | 7.49  | 0.11  | 9.37E-01 | no |
| C78339       | 8.20  | 8.85  | 0.11  | 9.37E-01 | no |
| Zfp189       | 4.55  | 4.90  | 0.11  | 9.37E-01 | no |
| Bok          | 9.69  | 10.41 | 0.10  | 9.37E-01 | no |
| Lman2        | 34.45 | 33.01 | -0.06 | 9.37E-01 | no |
| Prpf3        | 19.83 | 18.88 | -0.07 | 9.37E-01 | no |
| Xpnpep1      | 16.20 | 15.36 | -0.08 | 9.37E-01 | no |
| Acadm        | 14.78 | 13.90 | -0.09 | 9.37E-01 | no |
| Gpr89        | 11.09 | 10.36 | -0.10 | 9.37E-01 | no |
| 1700009P17Ri | 1.14  | 1.00  | -0.19 | 9.37E-01 | no |
| Syng1        | 0.39  | 0.31  | -0.36 | 9.37E-01 | no |
| Actn3        | 0.08  | 0.06  | -0.41 | 9.37E-01 | no |
| Oscar        | 0.12  | 0.09  | -0.50 | 9.37E-01 | no |
| Lepr         | 0.05  | 0.03  | -0.58 | 9.37E-01 | no |
| Gls2         | 0.04  | 0.03  | -0.78 | 9.37E-01 | no |
| Rab42-ps     | 0.09  | 0.16  | 0.75  | 9.38E-01 | no |
| Gm4787       | 0.51  | 0.58  | 0.19  | 9.38E-01 | no |
| Pros1        | 0.47  | 0.54  | 0.19  | 9.38E-01 | no |
| 1700120K04Ri | 1.13  | 1.32  | 0.22  | 9.38E-01 | no |
| Pmf1         | 50.41 | 52.89 | 0.07  | 9.38E-01 | no |
| Mrpl9        | 28.96 | 27.53 | -0.07 | 9.38E-01 | no |
| Tagln        | 1.57  | 1.74  | 0.15  | 9.38E-01 | no |
| Ndufb2       | 33.63 | 36.08 | 0.10  | 9.38E-01 | no |
| Nat14        | 1.21  | 1.08  | -0.16 | 9.38E-01 | no |
| 3110047P20Ri | 0.01  | 0.01  | 0.68  | 9.38E-01 | no |

|              |       |       |       |          |    |
|--------------|-------|-------|-------|----------|----|
| 5031425F14Ri | 0.04  | 0.06  | 0.67  | 9.38E-01 | no |
| Tspan18      | 0.02  | 0.04  | 0.67  | 9.38E-01 | no |
| A230072C01Ri | 3.47  | 3.81  | 0.13  | 9.38E-01 | no |
| Tmem181c-ps  | 6.09  | 6.50  | 0.10  | 9.38E-01 | no |
| Zfp874b      | 5.88  | 6.28  | 0.10  | 9.38E-01 | no |
| Msto1        | 10.82 | 11.53 | 0.09  | 9.38E-01 | no |
| Zfp369       | 9.94  | 10.53 | 0.08  | 9.38E-01 | no |
| Slco4a1      | 25.20 | 24.04 | -0.07 | 9.38E-01 | no |
| Ptger2       | 0.36  | 0.31  | -0.20 | 9.38E-01 | no |
| Mafa         | 0.22  | 0.17  | -0.41 | 9.38E-01 | no |
| Nat8         | 0.06  | 0.11  | 0.79  | 9.38E-01 | no |
| Ccin         | 0.03  | 0.05  | 0.68  | 9.38E-01 | no |
| Cxx1a        | 8.48  | 9.14  | 0.11  | 9.38E-01 | no |
| Zfp85-rs1    | 5.87  | 6.33  | 0.11  | 9.38E-01 | no |
| Jmjd7        | 11.65 | 12.46 | 0.10  | 9.38E-01 | no |
| Zfp609       | 6.88  | 7.22  | 0.07  | 9.38E-01 | no |
| Fkbp5        | 23.04 | 22.03 | -0.06 | 9.38E-01 | no |
| Dedd         | 15.67 | 14.90 | -0.07 | 9.38E-01 | no |
| B4galt5      | 9.04  | 8.57  | -0.08 | 9.38E-01 | no |
| Dpy19l4      | 10.51 | 9.89  | -0.09 | 9.38E-01 | no |
| Trim23       | 7.54  | 7.10  | -0.09 | 9.38E-01 | no |
| 2310057M21R  | 6.19  | 5.75  | -0.11 | 9.38E-01 | no |
| Cldnd2       | 0.47  | 0.36  | -0.40 | 9.38E-01 | no |
| Ypel3        | 59.97 | 62.58 | 0.06  | 9.38E-01 | no |
| Galnt4       | 7.84  | 8.27  | 0.08  | 9.38E-01 | no |
| Tmem198      | 0.47  | 0.41  | -0.21 | 9.38E-01 | no |
| 1110007C09Ri | 4.84  | 5.31  | 0.14  | 9.39E-01 | no |
| Fam92a       | 9.46  | 10.18 | 0.11  | 9.39E-01 | no |
| Gipc1        | 20.42 | 19.34 | -0.08 | 9.39E-01 | no |
| Tm2d2        | 16.74 | 15.71 | -0.09 | 9.39E-01 | no |
| Ddx59        | 7.22  | 6.74  | -0.10 | 9.39E-01 | no |
| St3gal2      | 3.97  | 4.24  | 0.09  | 9.39E-01 | no |
| Ankrd17      | 26.68 | 27.52 | 0.04  | 9.39E-01 | no |
| Ptbp2        | 16.66 | 15.83 | -0.07 | 9.39E-01 | no |
| Gpt2         | 1.39  | 1.27  | -0.13 | 9.39E-01 | no |
| Dysfip1      | 0.10  | 0.16  | 0.66  | 9.39E-01 | no |
| Ephx4        | 0.11  | 0.07  | -0.73 | 9.39E-01 | no |
| Obfc2b       | 22.16 | 20.86 | -0.09 | 9.39E-01 | no |
| Rabac1       | 22.50 | 21.08 | -0.09 | 9.39E-01 | no |
| Rnpepl1      | 25.31 | 26.47 | 0.06  | 9.39E-01 | no |
| Ppp1r14a     | 0.12  | 0.19  | 0.68  | 9.39E-01 | no |
| Mesp2        | 0.04  | 0.06  | 0.67  | 9.39E-01 | no |

|              |        |        |       |          |    |
|--------------|--------|--------|-------|----------|----|
| 1110034G24Ri | 3.24   | 3.55   | 0.13  | 9.39E-01 | no |
| Rbbp9        | 4.68   | 5.06   | 0.11  | 9.39E-01 | no |
| Rnf149       | 5.99   | 6.44   | 0.10  | 9.39E-01 | no |
| AI987944     | 8.97   | 9.52   | 0.09  | 9.39E-01 | no |
| Rab10        | 45.10  | 43.26  | -0.06 | 9.39E-01 | no |
| Cnot7        | 25.01  | 23.85  | -0.07 | 9.39E-01 | no |
| Kbtbd4       | 15.67  | 14.86  | -0.08 | 9.39E-01 | no |
| Mtmr10       | 2.79   | 2.59   | -0.10 | 9.39E-01 | no |
| Deb1         | 11.09  | 10.16  | -0.13 | 9.39E-01 | no |
| Gpr111       | 0.10   | 0.08   | -0.39 | 9.39E-01 | no |
| Ccdc37       | 0.03   | 0.05   | 0.66  | 9.39E-01 | no |
| Ccdc80       | 0.02   | 0.04   | 0.66  | 9.39E-01 | no |
| AI428936     | 0.67   | 0.76   | 0.18  | 9.39E-01 | no |
| Stx3         | 2.27   | 2.46   | 0.12  | 9.39E-01 | no |
| Tmtc4        | 4.22   | 4.54   | 0.10  | 9.39E-01 | no |
| Hinfp        | 11.49  | 12.19  | 0.08  | 9.39E-01 | no |
| 4932415G12Ri | 7.66   | 8.12   | 0.08  | 9.39E-01 | no |
| Zfp169       | 7.03   | 7.42   | 0.08  | 9.39E-01 | no |
| Zfp865       | 15.14  | 15.85  | 0.07  | 9.39E-01 | no |
| Dctn2        | 30.89  | 32.32  | 0.07  | 9.39E-01 | no |
| Cd79b        | 132.93 | 127.56 | -0.06 | 9.39E-01 | no |
| Aldh18a1     | 19.90  | 19.09  | -0.06 | 9.39E-01 | no |
| Ap2a1        | 29.07  | 27.88  | -0.06 | 9.39E-01 | no |
| Arl5b        | 11.32  | 10.70  | -0.08 | 9.39E-01 | no |
| Pdpf         | 31.12  | 29.34  | -0.09 | 9.39E-01 | no |
| Ube2f        | 16.80  | 15.77  | -0.09 | 9.39E-01 | no |
| Plxnc1       | 2.05   | 1.90   | -0.11 | 9.39E-01 | no |
| Gm16516      | 0.75   | 0.65   | -0.20 | 9.39E-01 | no |
| 1700025K23Ri | 1.05   | 0.90   | -0.22 | 9.39E-01 | no |
| Acvrl1       | 0.11   | 0.09   | -0.30 | 9.39E-01 | no |
| Gorab        | 4.51   | 4.18   | -0.11 | 9.40E-01 | no |
| Gosr2        | 33.19  | 34.64  | 0.06  | 9.40E-01 | no |
| Sertad2      | 6.95   | 6.60   | -0.08 | 9.40E-01 | no |
| Gm5136       | 0.19   | 0.15   | -0.39 | 9.40E-01 | no |
| Clic1        | 110.61 | 115.25 | 0.06  | 9.40E-01 | no |
| Lrpprc       | 21.79  | 20.88  | -0.06 | 9.40E-01 | no |
| Fbxw11       | 25.69  | 24.62  | -0.06 | 9.40E-01 | no |
| Pigb         | 4.86   | 4.50   | -0.11 | 9.40E-01 | no |
| Npm2         | 0.11   | 0.07   | -0.73 | 9.40E-01 | no |
| Pcnx13       | 22.87  | 23.82  | 0.06  | 9.40E-01 | no |
| Exosc4       | 12.59  | 11.85  | -0.09 | 9.40E-01 | no |
| St3gal3      | 5.98   | 5.59   | -0.10 | 9.40E-01 | no |

|              |       |       |       |          |    |
|--------------|-------|-------|-------|----------|----|
| Sesn2        | 1.58  | 1.44  | -0.13 | 9.40E-01 | no |
| Samd3        | 0.05  | 0.08  | 0.65  | 9.40E-01 | no |
| Tmem163      | 1.38  | 1.52  | 0.14  | 9.40E-01 | no |
| Dao          | 0.05  | 0.08  | 0.65  | 9.41E-01 | no |
| C030034I22Ri | 3.49  | 3.23  | -0.11 | 9.41E-01 | no |
| Nnat         | 1.50  | 2.39  | 0.67  | 9.41E-01 | no |
| BC055004     | 0.04  | 0.06  | 0.65  | 9.41E-01 | no |
| Cxcl16       | 0.14  | 0.17  | 0.31  | 9.41E-01 | no |
| Frmd5        | 0.18  | 0.20  | 0.20  | 9.41E-01 | no |
| Gm3435       | 7.58  | 8.11  | 0.10  | 9.41E-01 | no |
| Mtch1        | 39.08 | 40.81 | 0.06  | 9.41E-01 | no |
| Prr14        | 26.73 | 25.55 | -0.06 | 9.41E-01 | no |
| Ankrd26      | 6.58  | 6.25  | -0.07 | 9.41E-01 | no |
| 5730455P16Ri | 8.12  | 7.69  | -0.08 | 9.41E-01 | no |
| Esam         | 0.04  | 0.06  | 0.65  | 9.41E-01 | no |
| Hs2st1       | 5.60  | 5.94  | 0.08  | 9.41E-01 | no |
| Dem1         | 15.28 | 16.10 | 0.08  | 9.41E-01 | no |
| Mcl1         | 61.09 | 63.61 | 0.06  | 9.41E-01 | no |
| Zfp873       | 8.73  | 8.17  | -0.10 | 9.41E-01 | no |
| Zkscan4      | 1.60  | 1.75  | 0.13  | 9.41E-01 | no |
| 4930447C04Ri | 0.13  | 0.09  | -0.49 | 9.41E-01 | no |
| Npw          | 0.24  | 0.16  | -0.54 | 9.41E-01 | no |
| Esrp1        | 0.02  | 0.04  | 0.61  | 9.41E-01 | no |
| Tnip3        | 0.03  | 0.02  | -0.68 | 9.41E-01 | no |
| Tgoln2       | 3.52  | 5.30  | 0.59  | 9.41E-01 | no |
| Dusp7        | 16.22 | 17.00 | 0.07  | 9.41E-01 | no |
| Slc36a3      | 0.05  | 0.08  | 0.64  | 9.41E-01 | no |
| Xkrx         | 0.67  | 0.75  | 0.16  | 9.41E-01 | no |
| Tmem150a     | 1.17  | 1.30  | 0.16  | 9.41E-01 | no |
| H2-DMa       | 9.75  | 10.54 | 0.11  | 9.41E-01 | no |
| Med10        | 22.85 | 24.29 | 0.09  | 9.41E-01 | no |
| Zfp935       | 8.84  | 9.40  | 0.09  | 9.41E-01 | no |
| Nbas         | 6.65  | 6.97  | 0.07  | 9.41E-01 | no |
| Zfp426       | 12.31 | 12.91 | 0.07  | 9.41E-01 | no |
| Bsn          | 3.03  | 3.17  | 0.07  | 9.41E-01 | no |
| Ttc15        | 21.94 | 22.78 | 0.05  | 9.41E-01 | no |
| Reps1        | 25.73 | 24.69 | -0.06 | 9.41E-01 | no |
| Dhx57        | 14.49 | 13.90 | -0.06 | 9.41E-01 | no |
| Sdf4         | 20.18 | 19.35 | -0.06 | 9.41E-01 | no |
| Mex3c        | 23.65 | 22.66 | -0.06 | 9.41E-01 | no |
| Nrbp1        | 26.85 | 25.65 | -0.07 | 9.41E-01 | no |
| 6720456B07Ri | 49.43 | 47.16 | -0.07 | 9.41E-01 | no |

|              |        |        |       |          |    |
|--------------|--------|--------|-------|----------|----|
| 0610011L14Ri | 11.22  | 10.68  | -0.07 | 9.41E-01 | no |
| Zbtb6        | 10.81  | 10.27  | -0.07 | 9.41E-01 | no |
| Ubac1        | 9.65   | 9.14   | -0.08 | 9.41E-01 | no |
| Slc25a16     | 10.23  | 9.66   | -0.08 | 9.41E-01 | no |
| Pars2        | 7.19   | 6.75   | -0.09 | 9.41E-01 | no |
| Arl3         | 14.24  | 13.25  | -0.10 | 9.41E-01 | no |
| Dlg2         | 0.58   | 0.52   | -0.15 | 9.41E-01 | no |
| 6330403K07Ri | 0.20   | 0.16   | -0.34 | 9.41E-01 | no |
| Atp4b        | 0.08   | 0.05   | -0.72 | 9.41E-01 | no |
| Rdh10        | 4.97   | 4.61   | -0.11 | 9.41E-01 | no |
| Akr1b8       | 0.19   | 0.24   | 0.33  | 9.41E-01 | no |
| Spn          | 54.15  | 56.20  | 0.05  | 9.42E-01 | no |
| 1810043H04Ri | 18.55  | 17.20  | -0.11 | 9.42E-01 | no |
| Vmn2r85      | 0.07   | 0.05   | -0.58 | 9.42E-01 | no |
| Crtam        | 0.04   | 0.07   | 0.64  | 9.42E-01 | no |
| Rassf7       | 5.81   | 6.25   | 0.11  | 9.42E-01 | no |
| Slc25a13     | 6.20   | 6.59   | 0.09  | 9.42E-01 | no |
| Tcf25        | 66.39  | 68.41  | 0.04  | 9.42E-01 | no |
| Ina          | 0.03   | 0.02   | -0.82 | 9.42E-01 | no |
| Phospho2     | 12.69  | 11.96  | -0.09 | 9.42E-01 | no |
| Hoxa1        | 0.04   | 0.07   | 0.64  | 9.42E-01 | no |
| Sec16a       | 19.01  | 18.27  | -0.06 | 9.42E-01 | no |
| Dazap2       | 125.15 | 120.33 | -0.06 | 9.43E-01 | no |
| A3galt2      | 0.21   | 0.18   | -0.22 | 9.43E-01 | no |
| Atf3         | 0.16   | 0.19   | 0.30  | 9.43E-01 | no |
| Hs3st3b1     | 0.08   | 0.10   | 0.24  | 9.43E-01 | no |
| S100a4       | 2.50   | 2.81   | 0.17  | 9.43E-01 | no |
| Mkrn1        | 19.62  | 20.53  | 0.07  | 9.43E-01 | no |
| Zfp280c      | 15.84  | 16.50  | 0.06  | 9.43E-01 | no |
| Arhgap1      | 27.05  | 26.13  | -0.05 | 9.43E-01 | no |
| Wibg         | 38.92  | 37.28  | -0.06 | 9.43E-01 | no |
| Tmem135      | 12.56  | 11.94  | -0.07 | 9.43E-01 | no |
| BC056474     | 35.15  | 33.16  | -0.08 | 9.43E-01 | no |
| Rufy3        | 4.63   | 4.34   | -0.09 | 9.43E-01 | no |
| Nav1         | 0.19   | 0.17   | -0.15 | 9.43E-01 | no |
| Clec4e       | 0.14   | 0.11   | -0.36 | 9.43E-01 | no |
| Pck2         | 30.91  | 29.66  | -0.06 | 9.43E-01 | no |
| Farp1        | 0.20   | 0.23   | 0.18  | 9.43E-01 | no |
| Aldh7a1      | 4.58   | 4.94   | 0.11  | 9.43E-01 | no |
| Hmbox1       | 15.05  | 15.80  | 0.07  | 9.43E-01 | no |
| Rrm2b        | 28.12  | 26.99  | -0.06 | 9.43E-01 | no |
| Wdr24        | 14.93  | 14.23  | -0.07 | 9.43E-01 | no |



|           |       |       |       |          |    |
|-----------|-------|-------|-------|----------|----|
| Hist1h2bk | 0.19  | 0.10  | -0.92 | 9.43E-01 | no |
| Slc38a8   | 0.05  | 0.07  | 0.46  | 9.43E-01 | no |
| Pstk      | 4.78  | 5.20  | 0.12  | 9.43E-01 | no |
| Klf11     | 3.35  | 3.59  | 0.10  | 9.43E-01 | no |
| Dpm1      | 11.93 | 12.64 | 0.08  | 9.43E-01 | no |
| Vps53     | 10.86 | 11.44 | 0.08  | 9.43E-01 | no |
| Gm1564    | 0.03  | 0.02  | -0.70 | 9.43E-01 | no |
| Ube2a     | 34.33 | 35.97 | 0.07  | 9.43E-01 | no |
| Sod2      | 12.41 | 11.81 | -0.07 | 9.43E-01 | no |
| Lasp1     | 31.72 | 30.46 | -0.06 | 9.43E-01 | no |
| Rce1      | 16.40 | 15.48 | -0.08 | 9.43E-01 | no |
| Dcps      | 31.50 | 29.96 | -0.07 | 9.43E-01 | no |
| Pnma1     | 0.37  | 0.42  | 0.18  | 9.44E-01 | no |
| Bod1      | 10.96 | 11.68 | 0.09  | 9.44E-01 | no |
| Prmt3     | 19.69 | 18.78 | -0.07 | 9.44E-01 | no |
| Mrpl14    | 22.80 | 21.31 | -0.10 | 9.44E-01 | no |
| Ears2     | 4.85  | 4.51  | -0.11 | 9.44E-01 | no |
| Muc5b     | 0.01  | 0.01  | 0.62  | 9.44E-01 | no |
| Gm13547   | 0.47  | 0.58  | 0.30  | 9.44E-01 | no |
| Metrn1    | 0.13  | 0.16  | 0.29  | 9.44E-01 | no |
| Sntb1     | 0.20  | 0.24  | 0.24  | 9.44E-01 | no |
| Aipl1     | 0.92  | 1.03  | 0.16  | 9.44E-01 | no |
| Eps8l2    | 3.91  | 4.19  | 0.10  | 9.44E-01 | no |
| Shkbp1    | 18.44 | 19.33 | 0.07  | 9.44E-01 | no |
| Xrn1      | 12.17 | 12.71 | 0.06  | 9.44E-01 | no |
| Brd1      | 26.50 | 25.48 | -0.06 | 9.44E-01 | no |
| Ralgapb   | 16.15 | 15.53 | -0.06 | 9.44E-01 | no |
| Tlk2      | 12.73 | 12.21 | -0.06 | 9.44E-01 | no |
| Hmgcr     | 19.88 | 19.07 | -0.06 | 9.44E-01 | no |
| Chchd3    | 31.40 | 29.96 | -0.07 | 9.44E-01 | no |
| Mmadhc    | 27.32 | 25.93 | -0.08 | 9.44E-01 | no |
| Parp8     | 7.18  | 6.76  | -0.09 | 9.44E-01 | no |
| Prr24     | 9.58  | 8.98  | -0.09 | 9.44E-01 | no |
| Churc1    | 18.39 | 17.12 | -0.10 | 9.44E-01 | no |
| Zfp52     | 3.76  | 3.50  | -0.10 | 9.44E-01 | no |
| Ccdc102a  | 0.67  | 0.60  | -0.16 | 9.44E-01 | no |
| Tmem120b  | 0.84  | 0.75  | -0.16 | 9.44E-01 | no |
| Rab26     | 0.29  | 0.24  | -0.27 | 9.44E-01 | no |
| Ceacam19  | 0.03  | 0.02  | -0.72 | 9.44E-01 | no |
| Gm6710    | 0.03  | 0.05  | 0.64  | 9.44E-01 | no |
| Serinc1   | 26.93 | 28.13 | 0.06  | 9.44E-01 | no |
| Snhg9     | 1.00  | 0.74  | -0.42 | 9.44E-01 | no |

|               |        |        |       |          |    |
|---------------|--------|--------|-------|----------|----|
| Kifap3        | 5.53   | 5.87   | 0.09  | 9.44E-01 | no |
| Dnm2          | 30.42  | 31.64  | 0.06  | 9.44E-01 | no |
| Mtap7d2       | 0.04   | 0.05   | 0.45  | 9.44E-01 | no |
| Nrip3         | 0.06   | 0.08   | 0.35  | 9.44E-01 | no |
| Numb          | 9.15   | 9.73   | 0.09  | 9.44E-01 | no |
| Mettl13       | 9.80   | 10.34  | 0.08  | 9.44E-01 | no |
| Sppl3         | 28.48  | 29.71  | 0.06  | 9.44E-01 | no |
| Fam168b       | 69.68  | 67.62  | -0.04 | 9.44E-01 | no |
| Reep3         | 14.86  | 14.14  | -0.07 | 9.44E-01 | no |
| Mrps17        | 28.26  | 26.81  | -0.08 | 9.44E-01 | no |
| Gale          | 7.21   | 6.72   | -0.10 | 9.44E-01 | no |
| P2ry2         | 0.05   | 0.07   | 0.45  | 9.44E-01 | no |
| Gm7694        | 0.35   | 0.39   | 0.16  | 9.44E-01 | no |
| Zc3h7b        | 23.84  | 24.79  | 0.06  | 9.44E-01 | no |
| Snx13         | 10.67  | 10.20  | -0.06 | 9.44E-01 | no |
| Fam196b       | 0.10   | 0.09   | -0.23 | 9.44E-01 | no |
| Nxf7          | 0.05   | 0.08   | 0.62  | 9.44E-01 | no |
| Rps12         | 1.64   | 1.86   | 0.18  | 9.44E-01 | no |
| Sin3b         | 41.67  | 43.38  | 0.06  | 9.44E-01 | no |
| Cx3cr1        | 0.36   | 0.32   | -0.16 | 9.44E-01 | no |
| Gm6578        | 0.24   | 0.26   | 0.15  | 9.44E-01 | no |
| Imp3          | 43.98  | 46.16  | 0.07  | 9.44E-01 | no |
| Ubn2          | 15.39  | 14.80  | -0.06 | 9.44E-01 | no |
| Mtf2          | 39.63  | 38.10  | -0.06 | 9.44E-01 | no |
| Snta1         | 0.05   | 0.03   | -0.69 | 9.44E-01 | no |
| Paqr6         | 0.04   | 0.06   | 0.62  | 9.44E-01 | no |
| Ube2e1        | 44.02  | 46.01  | 0.06  | 9.44E-01 | no |
| Atg2a         | 11.58  | 12.06  | 0.06  | 9.44E-01 | no |
| Gphb5         | 0.06   | 0.09   | 0.61  | 9.45E-01 | no |
| Hcn3          | 0.58   | 0.64   | 0.15  | 9.45E-01 | no |
| Mcts2         | 4.66   | 5.09   | 0.13  | 9.45E-01 | no |
| Brms1         | 19.60  | 18.58  | -0.08 | 9.45E-01 | no |
| 9330151L19Ril | 3.01   | 2.78   | -0.11 | 9.45E-01 | no |
| 4930519F09Ri  | 2.09   | 1.91   | -0.13 | 9.45E-01 | no |
| Kcnd1         | 0.33   | 0.28   | -0.22 | 9.45E-01 | no |
| Cbr3          | 0.22   | 0.18   | -0.33 | 9.45E-01 | no |
| Ufd1l         | 18.68  | 17.80  | -0.07 | 9.45E-01 | no |
| Cep57l1       | 14.83  | 15.57  | 0.07  | 9.45E-01 | no |
| Al414108      | 0.02   | 0.03   | 0.61  | 9.45E-01 | no |
| Tmc1          | 0.08   | 0.06   | -0.35 | 9.45E-01 | no |
| Capn7         | 32.40  | 31.14  | -0.06 | 9.45E-01 | no |
| Atp2a3        | 115.78 | 112.91 | -0.04 | 9.46E-01 | no |

|               |       |       |       |          |    |
|---------------|-------|-------|-------|----------|----|
| Plekhn1       | 5.44  | 5.81  | 0.10  | 9.46E-01 | no |
| 1700029I15Rik | 0.68  | 0.52  | -0.39 | 9.46E-01 | no |
| Ppapdc1b      | 4.71  | 5.09  | 0.11  | 9.46E-01 | no |
| Anapc13       | 27.04 | 28.91 | 0.10  | 9.46E-01 | no |
| Srfbp1        | 23.31 | 22.19 | -0.07 | 9.46E-01 | no |
| Zdhhc9        | 5.73  | 5.38  | -0.09 | 9.46E-01 | no |
| Zfp712        | 3.13  | 2.92  | -0.10 | 9.46E-01 | no |
| Qdpr          | 25.93 | 27.21 | 0.07  | 9.46E-01 | no |
| Nsfl1c        | 36.16 | 34.59 | -0.06 | 9.46E-01 | no |
| Rrp9          | 13.87 | 13.12 | -0.08 | 9.46E-01 | no |
| Zcrb1         | 22.07 | 20.76 | -0.09 | 9.46E-01 | no |
| Tnfaip8l1     | 2.44  | 2.25  | -0.12 | 9.46E-01 | no |
| Plp1          | 1.45  | 1.32  | -0.13 | 9.46E-01 | no |
| Adam22        | 0.18  | 0.13  | -0.41 | 9.46E-01 | no |
| Ankrd29       | 0.03  | 0.05  | 0.60  | 9.47E-01 | no |
| Gja6          | 0.09  | 0.13  | 0.44  | 9.47E-01 | no |
| Plek2         | 0.12  | 0.15  | 0.37  | 9.47E-01 | no |
| Stab1         | 0.05  | 0.06  | 0.23  | 9.47E-01 | no |
| Cebpb         | 0.63  | 0.71  | 0.17  | 9.47E-01 | no |
| Il20rb        | 0.91  | 1.00  | 0.14  | 9.47E-01 | no |
| Ada           | 12.93 | 13.67 | 0.08  | 9.47E-01 | no |
| Zfp780b       | 4.44  | 4.69  | 0.08  | 9.47E-01 | no |
| Cdc42bpg      | 6.36  | 6.66  | 0.07  | 9.47E-01 | no |
| Extl3         | 9.39  | 9.80  | 0.06  | 9.47E-01 | no |
| AB124611      | 37.30 | 38.89 | 0.06  | 9.47E-01 | no |
| Ccnt2         | 25.40 | 26.44 | 0.06  | 9.47E-01 | no |
| Nbr1          | 19.25 | 20.03 | 0.06  | 9.47E-01 | no |
| Rsb1          | 15.84 | 16.48 | 0.06  | 9.47E-01 | no |
| 4632411B12Ri  | 21.15 | 21.98 | 0.06  | 9.47E-01 | no |
| Fam178a       | 22.26 | 23.12 | 0.05  | 9.47E-01 | no |
| Keap1         | 26.15 | 25.27 | -0.05 | 9.47E-01 | no |
| Chd8          | 30.05 | 28.95 | -0.05 | 9.47E-01 | no |
| Vapa          | 46.80 | 44.89 | -0.06 | 9.47E-01 | no |
| Ostc          | 38.74 | 36.92 | -0.07 | 9.47E-01 | no |
| Ngrn          | 19.12 | 18.21 | -0.07 | 9.47E-01 | no |
| Pcgf6         | 9.58  | 9.03  | -0.09 | 9.47E-01 | no |
| Arhgap5       | 4.15  | 3.90  | -0.09 | 9.47E-01 | no |
| Acpl2         | 4.71  | 4.41  | -0.09 | 9.47E-01 | no |
| Mx2           | 2.80  | 2.59  | -0.11 | 9.47E-01 | no |
| B430212C06Ri  | 0.84  | 0.76  | -0.14 | 9.47E-01 | no |
| Ppap2a        | 1.64  | 1.46  | -0.16 | 9.47E-01 | no |
| Hus1b         | 0.25  | 0.19  | -0.38 | 9.47E-01 | no |

|               |       |       |       |          |    |
|---------------|-------|-------|-------|----------|----|
| Hist2h2ab     | 0.33  | 0.24  | -0.49 | 9.47E-01 | no |
| 5830403L16Ril | 0.07  | 0.05  | -0.63 | 9.47E-01 | no |
| D330045A20R   | 0.03  | 0.02  | -0.64 | 9.47E-01 | no |
| 4430402I18Rik | 0.06  | 0.04  | -0.65 | 9.47E-01 | no |
| Slc30a6       | 6.96  | 6.52  | -0.09 | 9.47E-01 | no |
| Taf9b         | 4.73  | 5.06  | 0.10  | 9.47E-01 | no |
| Col28a1       | 0.04  | 0.05  | 0.41  | 9.47E-01 | no |
| Klhl21        | 7.78  | 8.18  | 0.07  | 9.47E-01 | no |
| Edf1          | 37.36 | 35.49 | -0.07 | 9.47E-01 | no |
| Brp16         | 12.04 | 11.40 | -0.08 | 9.47E-01 | no |
| Rps19         | 27.76 | 26.20 | -0.08 | 9.47E-01 | no |
| 2610035D17Ri  | 3.45  | 3.19  | -0.11 | 9.47E-01 | no |
| Pspn          | 0.48  | 0.37  | -0.38 | 9.47E-01 | no |
| Aldoart2      | 4.21  | 4.54  | 0.11  | 9.47E-01 | no |
| Dus3l         | 21.05 | 20.15 | -0.06 | 9.47E-01 | no |
| Zfp810        | 8.57  | 8.12  | -0.08 | 9.47E-01 | no |
| Nbeal1        | 2.90  | 3.06  | 0.07  | 9.48E-01 | no |
| Rev3l         | 14.67 | 14.13 | -0.05 | 9.48E-01 | no |
| Tnfsf8        | 0.73  | 0.65  | -0.15 | 9.48E-01 | no |
| Akr1b10       | 10.67 | 11.35 | 0.09  | 9.48E-01 | no |
| Mtrf1         | 3.66  | 3.39  | -0.11 | 9.48E-01 | no |
| Ranbp10       | 15.07 | 15.68 | 0.06  | 9.48E-01 | no |
| Atxn1l        | 13.27 | 12.77 | -0.06 | 9.48E-01 | no |
| Atrn          | 6.91  | 6.63  | -0.06 | 9.48E-01 | no |
| Omp           | 0.56  | 0.63  | 0.16  | 9.48E-01 | no |
| Zfr           | 31.93 | 30.76 | -0.05 | 9.48E-01 | no |
| Rnf167        | 34.39 | 35.89 | 0.06  | 9.49E-01 | no |
| Dgkk          | 0.01  | 0.02  | 0.59  | 9.49E-01 | no |
| Cdkn2aipnl    | 37.02 | 35.53 | -0.06 | 9.49E-01 | no |
| Ddx55         | 11.83 | 11.27 | -0.07 | 9.49E-01 | no |
| Gm16517       | 13.29 | 14.12 | 0.09  | 9.49E-01 | no |
| Dym           | 11.67 | 12.28 | 0.07  | 9.49E-01 | no |
| Strada        | 19.02 | 18.14 | -0.07 | 9.49E-01 | no |
| Rgl1          | 9.07  | 8.64  | -0.07 | 9.49E-01 | no |
| Dpagt1        | 16.40 | 15.58 | -0.07 | 9.49E-01 | no |
| Cyth4         | 8.40  | 8.86  | 0.08  | 9.49E-01 | no |
| Clec16a       | 6.12  | 5.84  | -0.07 | 9.49E-01 | no |
| Eif3f         | 87.18 | 84.02 | -0.05 | 9.49E-01 | no |
| Spry1         | 1.65  | 1.79  | 0.12  | 9.49E-01 | no |
| Hsh2d         | 9.67  | 10.30 | 0.09  | 9.49E-01 | no |
| Phxr4         | 0.09  | 0.14  | 0.58  | 9.50E-01 | no |
| Dusp12        | 10.18 | 10.84 | 0.09  | 9.50E-01 | no |

|              |       |       |       |          |    |
|--------------|-------|-------|-------|----------|----|
| Hdac3        | 32.19 | 30.90 | -0.06 | 9.50E-01 | no |
| Gdap2        | 7.45  | 7.03  | -0.08 | 9.50E-01 | no |
| Yes1         | 0.40  | 0.36  | -0.16 | 9.50E-01 | no |
| Slfn1        | 0.63  | 0.71  | 0.17  | 9.50E-01 | no |
| Diap2        | 3.08  | 3.25  | 0.08  | 9.50E-01 | no |
| Ptcd1        | 9.50  | 9.05  | -0.07 | 9.50E-01 | no |
| Alas1        | 9.88  | 9.38  | -0.07 | 9.50E-01 | no |
| Ttc5         | 31.17 | 32.32 | 0.05  | 9.50E-01 | no |
| Gm3219       | 20.75 | 19.44 | -0.09 | 9.50E-01 | no |
| Chmp1a       | 33.30 | 34.64 | 0.06  | 9.50E-01 | no |
| Papolg       | 11.67 | 12.22 | 0.07  | 9.50E-01 | no |
| Pdzd11       | 17.32 | 16.33 | -0.08 | 9.50E-01 | no |
| Lct          | 0.14  | 0.13  | -0.17 | 9.50E-01 | no |
| Ints9        | 19.72 | 18.90 | -0.06 | 9.50E-01 | no |
| Slc30a1      | 2.54  | 2.38  | -0.10 | 9.50E-01 | no |
| Wdr8         | 13.10 | 12.41 | -0.08 | 9.51E-01 | no |
| Serpinf1     | 9.46  | 8.91  | -0.09 | 9.51E-01 | no |
| Bbip1        | 13.64 | 12.76 | -0.10 | 9.51E-01 | no |
| Wdtd1        | 26.37 | 25.41 | -0.05 | 9.51E-01 | no |
| Dmrt2        | 0.03  | 0.04  | 0.58  | 9.51E-01 | no |
| Entpd6       | 7.53  | 7.97  | 0.08  | 9.51E-01 | no |
| Txn1         | 67.19 | 69.94 | 0.06  | 9.51E-01 | no |
| 4930412C18Ri | 0.05  | 0.04  | -0.44 | 9.51E-01 | no |
| Gm5431       | 2.56  | 2.38  | -0.11 | 9.51E-01 | no |
| Tsc2         | 16.81 | 17.41 | 0.05  | 9.51E-01 | no |
| Gm5434       | 3.40  | 3.14  | -0.12 | 9.51E-01 | no |
| Mt2          | 0.72  | 0.60  | -0.27 | 9.51E-01 | no |
| Zbtb8a       | 3.52  | 3.78  | 0.10  | 9.51E-01 | no |
| Ccdc59       | 18.81 | 17.80 | -0.08 | 9.51E-01 | no |
| Ubap1        | 16.04 | 15.34 | -0.06 | 9.52E-01 | no |
| Nin          | 18.76 | 18.20 | -0.04 | 9.52E-01 | no |
| Sav1         | 23.15 | 22.20 | -0.06 | 9.52E-01 | no |
| Actr10       | 10.46 | 9.98  | -0.07 | 9.52E-01 | no |
| Arhgap27     | 23.05 | 22.20 | -0.05 | 9.52E-01 | no |
| Gm3833       | 3.52  | 3.76  | 0.10  | 9.52E-01 | no |
| Paqr4        | 2.19  | 1.12  | -0.96 | 9.52E-01 | no |
| Gys1         | 7.32  | 7.69  | 0.07  | 9.52E-01 | no |
| Gripap1      | 15.55 | 16.21 | 0.06  | 9.52E-01 | no |
| Fxr2         | 23.60 | 22.70 | -0.06 | 9.52E-01 | no |
| Slc9a6       | 6.16  | 5.85  | -0.07 | 9.52E-01 | no |
| 2410066E13Ri | 8.19  | 8.72  | 0.09  | 9.52E-01 | no |
| Cd244        | 1.77  | 1.64  | -0.11 | 9.52E-01 | no |

|              |        |        |       |          |    |
|--------------|--------|--------|-------|----------|----|
| E230016K23Ri | 0.06   | 0.04   | -0.60 | 9.52E-01 | no |
| Dnahc7b      | 0.01   | 0.01   | 0.57  | 9.53E-01 | no |
| Kbtbd3       | 2.37   | 2.57   | 0.11  | 9.53E-01 | no |
| Rpain        | 9.33   | 9.96   | 0.09  | 9.53E-01 | no |
| Zdhhc12      | 9.62   | 10.24  | 0.09  | 9.53E-01 | no |
| Cog2         | 13.99  | 14.62  | 0.06  | 9.53E-01 | no |
| Rpl18        | 229.35 | 221.41 | -0.05 | 9.53E-01 | no |
| Dab2ip       | 11.25  | 10.82  | -0.06 | 9.53E-01 | no |
| Tmem80       | 18.79  | 17.88  | -0.07 | 9.53E-01 | no |
| Pgam2        | 2.58   | 2.35   | -0.13 | 9.53E-01 | no |
| Zfp511       | 13.23  | 14.03  | 0.09  | 9.53E-01 | no |
| Hgs          | 16.57  | 17.22  | 0.06  | 9.53E-01 | no |
| Ankhd1       | 24.78  | 25.67  | 0.05  | 9.53E-01 | no |
| Bcl7c        | 21.63  | 20.54  | -0.07 | 9.53E-01 | no |
| Shoc2        | 17.20  | 15.77  | -0.13 | 9.53E-01 | no |
| Fam193b      | 43.97  | 42.73  | -0.04 | 9.53E-01 | no |
| Psmc9        | 9.41   | 8.93   | -0.08 | 9.53E-01 | no |
| Cage1        | 1.13   | 1.23   | 0.12  | 9.53E-01 | no |
| Mbtps1       | 31.08  | 32.11  | 0.05  | 9.53E-01 | no |
| Cln8         | 0.73   | 0.79   | 0.12  | 9.53E-01 | no |
| Mustn1       | 0.65   | 0.74   | 0.17  | 9.53E-01 | no |
| Gm10345      | 0.87   | 0.96   | 0.14  | 9.53E-01 | no |
| Rcn3         | 2.36   | 2.56   | 0.12  | 9.53E-01 | no |
| AW209491     | 4.38   | 4.68   | 0.10  | 9.53E-01 | no |
| Fam45a       | 8.84   | 9.33   | 0.08  | 9.53E-01 | no |
| Rnf113a2     | 14.16  | 14.95  | 0.08  | 9.53E-01 | no |
| Atg16l2      | 14.72  | 15.40  | 0.07  | 9.53E-01 | no |
| Rchy1        | 22.77  | 23.78  | 0.06  | 9.53E-01 | no |
| Urb1         | 8.89   | 9.24   | 0.06  | 9.53E-01 | no |
| Rbm15b       | 23.61  | 24.52  | 0.05  | 9.53E-01 | no |
| Zfp217       | 26.48  | 25.70  | -0.04 | 9.53E-01 | no |
| Ptpn1        | 19.80  | 19.08  | -0.05 | 9.53E-01 | no |
| B3galt6      | 4.88   | 4.59   | -0.09 | 9.53E-01 | no |
| 6030422M02R  | 0.13   | 0.11   | -0.31 | 9.53E-01 | no |
| Foxo4        | 14.70  | 15.33  | 0.06  | 9.53E-01 | no |
| Tbc1d22b     | 13.11  | 12.56  | -0.06 | 9.53E-01 | no |
| Hes7         | 0.11   | 0.07   | -0.63 | 9.53E-01 | no |
| Pmaip1       | 1.50   | 1.62   | 0.12  | 9.53E-01 | no |
| Cxcr4        | 107.21 | 103.53 | -0.05 | 9.53E-01 | no |
| Gapdhs       | 1.35   | 1.49   | 0.14  | 9.53E-01 | no |
| Gorasp1      | 3.50   | 3.72   | 0.09  | 9.53E-01 | no |
| Ifrd1        | 15.22  | 16.00  | 0.07  | 9.53E-01 | no |

|               |       |       |       |          |    |
|---------------|-------|-------|-------|----------|----|
| Rac2          | 74.79 | 77.42 | 0.05  | 9.53E-01 | no |
| Azi2          | 20.93 | 20.18 | -0.05 | 9.53E-01 | no |
| Enoph1        | 13.42 | 12.76 | -0.07 | 9.53E-01 | no |
| Rars2         | 11.65 | 11.03 | -0.08 | 9.53E-01 | no |
| Cecr6         | 0.09  | 0.08  | -0.24 | 9.54E-01 | no |
| Dscr3         | 24.92 | 25.92 | 0.06  | 9.54E-01 | no |
| Zfp260        | 22.64 | 21.79 | -0.06 | 9.54E-01 | no |
| Cfdp1         | 29.18 | 27.91 | -0.06 | 9.54E-01 | no |
| Dmrt3         | 0.04  | 0.03  | -0.53 | 9.54E-01 | no |
| Agbl2         | 0.03  | 0.02  | -0.65 | 9.54E-01 | no |
| Dtna          | 0.02  | 0.01  | -0.65 | 9.54E-01 | no |
| C1qtnf3       | 0.05  | 0.07  | 0.56  | 9.54E-01 | no |
| Il1f9         | 0.07  | 0.10  | 0.56  | 9.54E-01 | no |
| Ikzf4         | 0.04  | 0.05  | 0.40  | 9.54E-01 | no |
| Prkaa2        | 0.28  | 0.31  | 0.14  | 9.54E-01 | no |
| Tmem181a      | 9.41  | 9.96  | 0.08  | 9.54E-01 | no |
| Zfp952        | 8.16  | 8.60  | 0.08  | 9.54E-01 | no |
| Trip11        | 9.77  | 10.16 | 0.06  | 9.54E-01 | no |
| Zfp263        | 24.52 | 25.45 | 0.05  | 9.54E-01 | no |
| Ccdc6         | 20.19 | 20.92 | 0.05  | 9.54E-01 | no |
| Arih1         | 31.39 | 30.32 | -0.05 | 9.54E-01 | no |
| Tbcd          | 17.64 | 16.98 | -0.06 | 9.54E-01 | no |
| Ddhd1         | 9.18  | 8.83  | -0.06 | 9.54E-01 | no |
| Gzf1          | 12.97 | 12.45 | -0.06 | 9.54E-01 | no |
| Qpctl         | 6.01  | 5.66  | -0.09 | 9.54E-01 | no |
| Lym4          | 5.67  | 5.30  | -0.10 | 9.54E-01 | no |
| Crlf1         | 0.40  | 0.35  | -0.18 | 9.54E-01 | no |
| Acyp2         | 0.95  | 0.82  | -0.21 | 9.54E-01 | no |
| Hist1h3b      | 0.53  | 0.41  | -0.36 | 9.54E-01 | no |
| Tnnt1         | 0.89  | 0.99  | 0.16  | 9.54E-01 | no |
| Rps28         | 39.22 | 41.66 | 0.09  | 9.54E-01 | no |
| Chfr          | 25.29 | 24.36 | -0.05 | 9.54E-01 | no |
| Pus7l         | 4.24  | 3.98  | -0.09 | 9.54E-01 | no |
| Tgm2          | 0.05  | 0.06  | 0.35  | 9.54E-01 | no |
| Bcl2l15       | 0.41  | 0.49  | 0.27  | 9.54E-01 | no |
| Egr3          | 1.65  | 1.81  | 0.13  | 9.54E-01 | no |
| St7l          | 3.00  | 3.22  | 0.11  | 9.54E-01 | no |
| Fzd8          | 0.06  | 0.04  | -0.38 | 9.54E-01 | no |
| 4930407l10Rik | 0.03  | 0.02  | -0.45 | 9.54E-01 | no |
| Eno4          | 0.04  | 0.03  | -0.64 | 9.54E-01 | no |
| Zfp617        | 9.19  | 8.74  | -0.07 | 9.54E-01 | no |
| Utp23         | 8.46  | 8.03  | -0.08 | 9.54E-01 | no |

|               |        |        |       |          |    |
|---------------|--------|--------|-------|----------|----|
| 1100001G20Ri  | 0.47   | 0.60   | 0.34  | 9.54E-01 | no |
| 2410016O06Ri  | 13.43  | 12.83  | -0.07 | 9.54E-01 | no |
| Pex14         | 10.75  | 11.31  | 0.07  | 9.54E-01 | no |
| Mri1          | 13.01  | 13.65  | 0.07  | 9.54E-01 | no |
| Sh2d2a        | 5.67   | 5.94   | 0.07  | 9.54E-01 | no |
| Tgfbr1        | 16.57  | 15.96  | -0.05 | 9.54E-01 | no |
| Trub1         | 5.40   | 5.14   | -0.07 | 9.54E-01 | no |
| Gtf2ird2      | 4.87   | 4.61   | -0.08 | 9.54E-01 | no |
| Uchl3         | 19.94  | 18.86  | -0.08 | 9.54E-01 | no |
| Slc15a3       | 5.88   | 5.54   | -0.09 | 9.54E-01 | no |
| Lrrc48        | 0.57   | 0.51   | -0.16 | 9.54E-01 | no |
| Tpt1          | 109.44 | 105.60 | -0.05 | 9.54E-01 | no |
| Traf3ip2      | 14.76  | 15.39  | 0.06  | 9.55E-01 | no |
| Tmem126b      | 12.00  | 11.22  | -0.10 | 9.55E-01 | no |
| D11Wsu47e     | 8.84   | 9.31   | 0.08  | 9.55E-01 | no |
| Gm5127        | 0.17   | 0.13   | -0.34 | 9.55E-01 | no |
| Hnf1a         | 0.06   | 0.07   | 0.32  | 9.55E-01 | no |
| Myom3         | 0.04   | 0.05   | 0.27  | 9.55E-01 | no |
| Prg2          | 0.50   | 0.58   | 0.20  | 9.55E-01 | no |
| Rgs3          | 2.43   | 2.58   | 0.08  | 9.55E-01 | no |
| Gng13         | 0.25   | 0.16   | -0.61 | 9.55E-01 | no |
| Bmp7          | 0.08   | 0.10   | 0.38  | 9.55E-01 | no |
| 4933425O20Ri  | 0.39   | 0.34   | -0.22 | 9.55E-01 | no |
| A330050B17Ri  | 0.09   | 0.25   | 1.42  | 9.55E-01 | no |
| Cyp4f40       | 0.01   | 0.04   | 1.35  | 9.55E-01 | no |
| Slc25a26      | 3.05   | 3.27   | 0.10  | 9.55E-01 | no |
| 4930404N11Ri  | 9.67   | 10.35  | 0.10  | 9.55E-01 | no |
| Srp68         | 31.82  | 30.69  | -0.05 | 9.55E-01 | no |
| Zfp958        | 8.43   | 7.97   | -0.08 | 9.55E-01 | no |
| Hic1          | 0.10   | 0.08   | -0.34 | 9.55E-01 | no |
| Rp2h          | 14.72  | 14.11  | -0.06 | 9.55E-01 | no |
| Uxs1          | 9.56   | 8.99   | -0.09 | 9.55E-01 | no |
| Tmem126a      | 11.02  | 10.30  | -0.10 | 9.55E-01 | no |
| Tmem170       | 3.76   | 3.50   | -0.10 | 9.55E-01 | no |
| Igdcc3        | 0.03   | 0.02   | -0.51 | 9.55E-01 | no |
| Slc26a10      | 0.07   | 0.09   | 0.38  | 9.55E-01 | no |
| Eea1          | 11.88  | 11.46  | -0.05 | 9.55E-01 | no |
| Rgs9          | 0.78   | 0.72   | -0.11 | 9.55E-01 | no |
| Moap1         | 2.64   | 2.04   | -0.37 | 9.55E-01 | no |
| Matn3         | 0.04   | 0.02   | -0.57 | 9.55E-01 | no |
| Slain1        | 19.62  | 18.86  | -0.06 | 9.55E-01 | no |
| 2410076I21Rik | 0.96   | 1.07   | 0.15  | 9.55E-01 | no |



|              |       |       |       |          |    |
|--------------|-------|-------|-------|----------|----|
| 4931429L15Ri | 0.03  | 0.05  | 0.54  | 9.56E-01 | no |
| Gm6724       | 0.17  | 0.21  | 0.33  | 9.56E-01 | no |
| Slc6a9       | 0.11  | 0.13  | 0.23  | 9.56E-01 | no |
| Txnrd2       | 6.61  | 7.01  | 0.08  | 9.56E-01 | no |
| Sltm         | 30.12 | 29.26 | -0.04 | 9.56E-01 | no |
| Myo1e        | 6.47  | 6.18  | -0.07 | 9.56E-01 | no |
| Igsf9b       | 0.05  | 0.04  | -0.32 | 9.56E-01 | no |
| 4933413G19Ri | 3.68  | 0.80  | -2.21 | 9.56E-01 | no |
| Ndufa6       | 36.68 | 38.56 | 0.07  | 9.56E-01 | no |
| Gstz1        | 12.98 | 12.33 | -0.07 | 9.56E-01 | no |
| Fam59a       | 0.06  | 0.05  | -0.28 | 9.56E-01 | no |
| 1500011K16Ri | 8.50  | 9.10  | 0.10  | 9.56E-01 | no |
| Apeh         | 21.09 | 21.92 | 0.06  | 9.56E-01 | no |
| Vars         | 68.57 | 70.89 | 0.05  | 9.56E-01 | no |
| Mtfr1        | 14.32 | 13.71 | -0.06 | 9.56E-01 | no |
| 0610037P05Ri | 24.19 | 23.08 | -0.07 | 9.56E-01 | no |
| Tspo         | 32.79 | 31.26 | -0.07 | 9.56E-01 | no |
| Rpl36        | 13.13 | 12.23 | -0.10 | 9.56E-01 | no |
| 4930403N07Ri | 0.13  | 0.16  | 0.25  | 9.56E-01 | no |
| Gm10451      | 1.46  | 1.61  | 0.14  | 9.56E-01 | no |
| D130017N08R  | 2.96  | 3.18  | 0.11  | 9.56E-01 | no |
| Usp22        | 25.21 | 26.10 | 0.05  | 9.56E-01 | no |
| Ptgr2        | 14.93 | 14.32 | -0.06 | 9.56E-01 | no |
| Ccdc130      | 5.30  | 5.62  | 0.08  | 9.56E-01 | no |
| Ap3s1        | 20.19 | 21.18 | 0.07  | 9.56E-01 | no |
| Hlf          | 0.08  | 0.07  | -0.25 | 9.56E-01 | no |
| Rab11fip4    | 0.12  | 0.14  | 0.21  | 9.57E-01 | no |
| Gm10035      | 0.44  | 0.49  | 0.18  | 9.57E-01 | no |
| Map3k2       | 11.80 | 11.40 | -0.05 | 9.57E-01 | no |
| Gltf         | 43.09 | 41.54 | -0.05 | 9.57E-01 | no |
| Fam117b      | 7.18  | 6.87  | -0.06 | 9.57E-01 | no |
| Cd55         | 8.43  | 8.88  | 0.08  | 9.57E-01 | no |
| Fnta         | 22.15 | 21.24 | -0.06 | 9.57E-01 | no |
| Erlec1       | 9.19  | 8.77  | -0.07 | 9.57E-01 | no |
| Tceanc       | 6.68  | 6.35  | -0.07 | 9.57E-01 | no |
| Neurl3       | 4.23  | 3.98  | -0.09 | 9.57E-01 | no |
| Ripply3      | 0.11  | 0.14  | 0.37  | 9.57E-01 | no |
| Upb1         | 0.32  | 0.36  | 0.19  | 9.57E-01 | no |
| Larp1        | 41.85 | 43.24 | 0.05  | 9.57E-01 | no |
| Fbxo4        | 2.23  | 2.09  | -0.10 | 9.57E-01 | no |
| Zswim7       | 3.86  | 3.57  | -0.12 | 9.57E-01 | no |
| Rfxap        | 10.46 | 9.96  | -0.07 | 9.57E-01 | no |

|              |       |       |       |          |    |
|--------------|-------|-------|-------|----------|----|
| Inpp5j       | 0.06  | 0.07  | 0.30  | 9.57E-01 | no |
| 4921507P07Ri | 0.27  | 0.31  | 0.18  | 9.57E-01 | no |
| Dctn5        | 36.20 | 34.82 | -0.06 | 9.57E-01 | no |
| Usp45        | 7.08  | 6.78  | -0.06 | 9.57E-01 | no |
| Disp2        | 0.03  | 0.04  | 0.31  | 9.57E-01 | no |
| Il17f        | 0.18  | 0.22  | 0.31  | 9.57E-01 | no |
| Yipf5        | 17.07 | 17.82 | 0.06  | 9.57E-01 | no |
| Eif3k        | 61.22 | 58.89 | -0.06 | 9.57E-01 | no |
| Mrrf         | 6.55  | 6.19  | -0.08 | 9.57E-01 | no |
| Car12        | 2.29  | 2.15  | -0.09 | 9.57E-01 | no |
| Cdc42se2     | 39.29 | 37.98 | -0.05 | 9.57E-01 | no |
| Bspry        | 0.38  | 0.34  | -0.17 | 9.57E-01 | no |
| Kif3b        | 7.91  | 8.23  | 0.06  | 9.57E-01 | no |
| Zdhhc24      | 7.82  | 8.21  | 0.07  | 9.57E-01 | no |
| Ggnbp2       | 29.52 | 28.50 | -0.05 | 9.57E-01 | no |
| Ampd2        | 19.61 | 18.92 | -0.05 | 9.57E-01 | no |
| Itfg2        | 12.22 | 11.67 | -0.07 | 9.57E-01 | no |
| Zfp651       | 0.09  | 0.08  | -0.18 | 9.57E-01 | no |
| Tmem127      | 21.80 | 22.57 | 0.05  | 9.57E-01 | no |
| Cabin1       | 21.08 | 21.78 | 0.05  | 9.57E-01 | no |
| Prokr1       | 0.05  | 0.07  | 0.31  | 9.57E-01 | no |
| 1700012D14Ri | 2.09  | 2.30  | 0.14  | 9.57E-01 | no |
| Tmem50a      | 36.94 | 38.49 | 0.06  | 9.57E-01 | no |
| Rest         | 14.39 | 13.88 | -0.05 | 9.57E-01 | no |
| Gata3        | 0.09  | 0.07  | -0.31 | 9.57E-01 | no |
| Epb4.9       | 0.04  | 0.03  | -0.49 | 9.57E-01 | no |
| Rnf39        | 0.07  | 0.05  | -0.60 | 9.57E-01 | no |
| Cryab        | 0.13  | 0.17  | 0.36  | 9.58E-01 | no |
| Gm13306      | 0.67  | 0.78  | 0.22  | 9.58E-01 | no |
| Krcc1        | 23.98 | 24.99 | 0.06  | 9.58E-01 | no |
| Tstd2        | 14.39 | 14.95 | 0.06  | 9.58E-01 | no |
| Dcaf8        | 33.80 | 34.93 | 0.05  | 9.58E-01 | no |
| 6330578E17Ri | 31.24 | 30.21 | -0.05 | 9.58E-01 | no |
| Map3k3       | 24.75 | 23.90 | -0.05 | 9.58E-01 | no |
| Gstk1        | 4.08  | 3.78  | -0.11 | 9.58E-01 | no |
| Elfn1        | 0.51  | 0.47  | -0.13 | 9.58E-01 | no |
| Plod3        | 7.97  | 8.34  | 0.07  | 9.58E-01 | no |
| 2700060E02Ri | 45.16 | 43.53 | -0.05 | 9.58E-01 | no |
| Rnf214       | 12.30 | 11.82 | -0.06 | 9.58E-01 | no |
| Lrig3        | 0.09  | 0.11  | 0.22  | 9.58E-01 | no |
| 1700008O03Ri | 0.20  | 0.16  | -0.34 | 9.58E-01 | no |
| Sbk2         | 0.06  | 0.09  | 0.52  | 9.58E-01 | no |

|              |        |        |       |          |    |
|--------------|--------|--------|-------|----------|----|
| Epha1        | 0.05   | 0.06   | 0.35  | 9.58E-01 | no |
| 2310009B15Ri | 7.24   | 7.77   | 0.10  | 9.58E-01 | no |
| Harbi1       | 4.63   | 4.92   | 0.09  | 9.58E-01 | no |
| Zfp560       | 3.46   | 3.65   | 0.08  | 9.58E-01 | no |
| Hdac4        | 3.71   | 3.91   | 0.08  | 9.58E-01 | no |
| 1600027N09Ri | 15.35  | 16.13  | 0.07  | 9.58E-01 | no |
| 2410002F23Ri | 23.27  | 24.18  | 0.06  | 9.58E-01 | no |
| Prrc2b       | 39.48  | 38.46  | -0.04 | 9.58E-01 | no |
| Ddx50        | 26.79  | 25.84  | -0.05 | 9.58E-01 | no |
| 1110014N23Ri | 21.90  | 21.11  | -0.05 | 9.58E-01 | no |
| Ppif         | 27.19  | 26.11  | -0.06 | 9.58E-01 | no |
| Coasy        | 13.31  | 12.75  | -0.06 | 9.58E-01 | no |
| Dynlrb1      | 44.88  | 42.95  | -0.06 | 9.58E-01 | no |
| Efcab8       | 0.79   | 0.72   | -0.15 | 9.58E-01 | no |
| Styk1        | 0.03   | 0.02   | -0.55 | 9.58E-01 | no |
| Nck2         | 7.84   | 7.46   | -0.07 | 9.58E-01 | no |
| Slc7a11      | 0.04   | 0.03   | -0.28 | 9.58E-01 | no |
| Zglp1        | 1.00   | 0.91   | -0.14 | 9.59E-01 | no |
| Mosc1        | 0.08   | 0.10   | 0.32  | 9.59E-01 | no |
| P4htm        | 0.34   | 0.38   | 0.16  | 9.59E-01 | no |
| Txndc15      | 9.76   | 10.30  | 0.08  | 9.59E-01 | no |
| Ucp2         | 208.04 | 215.88 | 0.05  | 9.59E-01 | no |
| Leng8        | 51.31  | 52.97  | 0.05  | 9.59E-01 | no |
| Jak1         | 37.38  | 36.21  | -0.05 | 9.59E-01 | no |
| Tmem87a      | 20.77  | 20.05  | -0.05 | 9.59E-01 | no |
| A430078G23R  | 11.35  | 10.87  | -0.06 | 9.59E-01 | no |
| Mrpl30       | 32.91  | 31.37  | -0.07 | 9.59E-01 | no |
| Tsen15       | 15.32  | 14.54  | -0.08 | 9.59E-01 | no |
| 1810032O08Ri | 11.06  | 10.49  | -0.08 | 9.59E-01 | no |
| Arhgap24     | 3.52   | 3.33   | -0.08 | 9.59E-01 | no |
| Zfp420       | 2.74   | 2.57   | -0.09 | 9.59E-01 | no |
| Dusp28       | 4.84   | 4.53   | -0.09 | 9.59E-01 | no |
| Tagln3       | 0.69   | 0.61   | -0.16 | 9.59E-01 | no |
| Thbs3        | 0.17   | 0.15   | -0.19 | 9.59E-01 | no |
| Gm15645      | 0.23   | 0.19   | -0.25 | 9.59E-01 | no |
| Hmx2         | 0.07   | 0.04   | -0.59 | 9.59E-01 | no |
| Cc2d2a       | 0.06   | 0.07   | 0.24  | 9.59E-01 | no |
| Kcnk12       | 0.08   | 0.06   | -0.44 | 9.59E-01 | no |
| Gas6         | 0.22   | 0.25   | 0.18  | 9.59E-01 | no |
| Tbc1d12      | 0.63   | 0.68   | 0.12  | 9.59E-01 | no |
| Lhx2         | 0.72   | 0.78   | 0.13  | 9.59E-01 | no |
| Stx17        | 10.73  | 11.13  | 0.05  | 9.59E-01 | no |

|               |       |       |       |          |    |
|---------------|-------|-------|-------|----------|----|
| Dnajb13       | 8.69  | 8.19  | -0.09 | 9.59E-01 | no |
| 1700025G04Ri  | 1.86  | 1.77  | -0.08 | 9.59E-01 | no |
| Rassf6        | 0.69  | 0.63  | -0.15 | 9.59E-01 | no |
| Lpar4         | 0.03  | 0.02  | -0.59 | 9.60E-01 | no |
| Ppp3ca        | 25.10 | 26.04 | 0.05  | 9.60E-01 | no |
| Zfp445        | 36.09 | 34.97 | -0.05 | 9.60E-01 | no |
| Jund          | 25.53 | 24.67 | -0.05 | 9.60E-01 | no |
| Atp5k         | 35.06 | 33.04 | -0.09 | 9.60E-01 | no |
| Tbx21         | 0.06  | 0.04  | -0.41 | 9.60E-01 | no |
| Slc38a6       | 2.94  | 2.74  | -0.10 | 9.60E-01 | no |
| Rpp25         | 0.27  | 0.23  | -0.23 | 9.60E-01 | no |
| Ap2a2         | 16.63 | 16.07 | -0.05 | 9.60E-01 | no |
| Arvcf         | 21.57 | 22.28 | 0.05  | 9.60E-01 | no |
| Scx           | 0.88  | 0.97  | 0.14  | 9.60E-01 | no |
| Gm3852        | 0.96  | 0.85  | -0.17 | 9.61E-01 | no |
| Krtcap3       | 4.73  | 4.41  | -0.10 | 9.61E-01 | no |
| Ammecr1l      | 19.26 | 19.95 | 0.05  | 9.61E-01 | no |
| Btn3a3        | 0.02  | 0.04  | 0.91  | 9.62E-01 | no |
| Tmem136       | 0.03  | 0.05  | 0.50  | 9.62E-01 | no |
| Il11ra2       | 0.19  | 0.27  | 0.45  | 9.62E-01 | no |
| Rem1          | 0.07  | 0.09  | 0.38  | 9.62E-01 | no |
| Tspan15       | 0.05  | 0.06  | 0.35  | 9.62E-01 | no |
| Aif1          | 0.26  | 0.32  | 0.25  | 9.62E-01 | no |
| Zscan30       | 2.51  | 2.74  | 0.12  | 9.62E-01 | no |
| Plekha3       | 8.40  | 8.79  | 0.07  | 9.62E-01 | no |
| Ndfip1        | 31.57 | 32.96 | 0.06  | 9.62E-01 | no |
| Atpbd4        | 13.12 | 13.69 | 0.06  | 9.62E-01 | no |
| Psme4         | 25.55 | 26.37 | 0.05  | 9.62E-01 | no |
| Gnl1          | 16.06 | 15.48 | -0.05 | 9.62E-01 | no |
| Rab24         | 20.84 | 20.04 | -0.06 | 9.62E-01 | no |
| Slc7a6os      | 23.20 | 22.29 | -0.06 | 9.62E-01 | no |
| Slx1b         | 6.45  | 6.17  | -0.06 | 9.62E-01 | no |
| Rab9          | 18.08 | 17.24 | -0.07 | 9.62E-01 | no |
| Ndufa12       | 30.56 | 29.04 | -0.07 | 9.62E-01 | no |
| 3110001I22Rik | 5.35  | 5.03  | -0.09 | 9.62E-01 | no |
| Tst           | 3.76  | 3.50  | -0.10 | 9.62E-01 | no |
| Pik3cb        | 0.62  | 0.57  | -0.11 | 9.62E-01 | no |
| Lysmd2        | 0.69  | 0.61  | -0.16 | 9.62E-01 | no |
| Scfd1         | 14.08 | 14.70 | 0.06  | 9.62E-01 | no |
| Lypla2        | 33.84 | 35.06 | 0.05  | 9.62E-01 | no |
| Ascc2         | 18.66 | 17.99 | -0.05 | 9.62E-01 | no |
| Pou6f1        | 1.40  | 1.31  | -0.09 | 9.62E-01 | no |

|              |       |       |       |          |    |
|--------------|-------|-------|-------|----------|----|
| Tcea3        | 0.06  | 0.08  | 0.56  | 9.62E-01 | no |
| Nrtn         | 0.17  | 0.21  | 0.28  | 9.62E-01 | no |
| Efnb1        | 0.84  | 0.91  | 0.11  | 9.62E-01 | no |
| Reck         | 0.90  | 0.97  | 0.10  | 9.62E-01 | no |
| 2900053A13Ri | 5.90  | 6.27  | 0.09  | 9.62E-01 | no |
| 2310047M10R  | 6.52  | 6.88  | 0.08  | 9.62E-01 | no |
| Ndufaf3      | 15.21 | 15.98 | 0.07  | 9.62E-01 | no |
| Rwdd2b       | 8.16  | 8.57  | 0.07  | 9.62E-01 | no |
| Smug1        | 5.39  | 5.66  | 0.07  | 9.62E-01 | no |
| Ss18l1       | 4.89  | 5.13  | 0.07  | 9.62E-01 | no |
| Arhgap10     | 6.96  | 7.29  | 0.07  | 9.62E-01 | no |
| Crls1        | 14.16 | 14.80 | 0.06  | 9.62E-01 | no |
| Ifi35        | 18.37 | 19.19 | 0.06  | 9.62E-01 | no |
| Snx17        | 32.01 | 33.11 | 0.05  | 9.62E-01 | no |
| Cul5         | 11.91 | 12.30 | 0.05  | 9.62E-01 | no |
| Zmym4        | 14.28 | 14.75 | 0.05  | 9.62E-01 | no |
| Gnl3l        | 17.39 | 16.88 | -0.04 | 9.62E-01 | no |
| Rbm16        | 28.80 | 27.92 | -0.04 | 9.62E-01 | no |
| Zfp644       | 15.40 | 14.90 | -0.05 | 9.62E-01 | no |
| Rsrc1        | 11.98 | 11.52 | -0.06 | 9.62E-01 | no |
| Rps6kb2      | 19.42 | 18.62 | -0.06 | 9.62E-01 | no |
| Crcp         | 18.78 | 18.00 | -0.06 | 9.62E-01 | no |
| Mtrf1l       | 8.01  | 7.63  | -0.07 | 9.62E-01 | no |
| Rft1         | 8.31  | 7.91  | -0.07 | 9.62E-01 | no |
| Fam96b       | 17.37 | 16.46 | -0.08 | 9.62E-01 | no |
| Gm13253      | 3.53  | 3.27  | -0.11 | 9.62E-01 | no |
| Gm7904       | 0.94  | 0.85  | -0.14 | 9.62E-01 | no |
| Slc12a5      | 0.10  | 0.09  | -0.17 | 9.62E-01 | no |
| Cebpd        | 0.24  | 0.22  | -0.18 | 9.62E-01 | no |
| Ttyh1        | 0.17  | 0.15  | -0.18 | 9.62E-01 | no |
| Gbx2         | 0.19  | 0.16  | -0.21 | 9.62E-01 | no |
| Acta1        | 0.15  | 0.12  | -0.32 | 9.62E-01 | no |
| Hist1h2bc    | 2.99  | 3.23  | 0.11  | 9.62E-01 | no |
| Atm          | 14.35 | 14.79 | 0.04  | 9.62E-01 | no |
| Ppp4r2       | 21.58 | 20.87 | -0.05 | 9.62E-01 | no |
| Samsn1       | 10.94 | 10.43 | -0.07 | 9.62E-01 | no |
| Apol10b      | 0.04  | 0.06  | 0.48  | 9.62E-01 | no |
| Ankrd34a     | 0.04  | 0.06  | 0.37  | 9.62E-01 | no |
| H2-DMb1      | 3.29  | 3.53  | 0.10  | 9.62E-01 | no |
| Spag4        | 1.47  | 1.36  | -0.11 | 9.62E-01 | no |
| Spem1        | 0.16  | 0.13  | -0.37 | 9.62E-01 | no |
| Sycp3        | 0.20  | 0.24  | 0.28  | 9.62E-01 | no |

|               |        |        |       |          |    |
|---------------|--------|--------|-------|----------|----|
| Rpl9          | 6.47   | 6.91   | 0.10  | 9.62E-01 | no |
| Dync1li2      | 20.76  | 20.10  | -0.05 | 9.62E-01 | no |
| Gm6623        | 5.65   | 5.36   | -0.08 | 9.62E-01 | no |
| 4930524L23Ri  | 0.20   | 0.49   | 1.27  | 9.63E-01 | no |
| Dok4          | 0.50   | 1.07   | 1.11  | 9.63E-01 | no |
| Pcp2          | 0.09   | 0.15   | 0.69  | 9.63E-01 | no |
| Nbl1          | 0.04   | 0.06   | 0.55  | 9.63E-01 | no |
| Arg2          | 0.15   | 0.19   | 0.28  | 9.63E-01 | no |
| Rpl27         | 13.13  | 13.87  | 0.08  | 9.63E-01 | no |
| Hacl1         | 4.49   | 4.74   | 0.08  | 9.63E-01 | no |
| Srek1ip1      | 12.26  | 12.87  | 0.07  | 9.63E-01 | no |
| Mterfd1       | 18.07  | 18.87  | 0.06  | 9.63E-01 | no |
| Vps52         | 24.82  | 25.65  | 0.05  | 9.63E-01 | no |
| Lamc1         | 12.60  | 13.00  | 0.05  | 9.63E-01 | no |
| Ddx6          | 82.39  | 83.97  | 0.03  | 9.63E-01 | no |
| Ptprcap       | 143.38 | 139.10 | -0.04 | 9.63E-01 | no |
| Hsd17b12      | 24.31  | 23.40  | -0.06 | 9.63E-01 | no |
| Fundc2        | 13.92  | 13.38  | -0.06 | 9.63E-01 | no |
| 2310079F23Ri  | 5.40   | 5.15   | -0.07 | 9.63E-01 | no |
| Rnaseh1       | 11.87  | 11.32  | -0.07 | 9.63E-01 | no |
| 6530401N04Ri  | 3.65   | 3.44   | -0.08 | 9.63E-01 | no |
| Marveld1      | 0.64   | 0.59   | -0.12 | 9.63E-01 | no |
| N6amt2        | 2.05   | 1.88   | -0.12 | 9.63E-01 | no |
| Rasgef1a      | 0.14   | 0.12   | -0.20 | 9.63E-01 | no |
| Kcnq4         | 0.10   | 0.08   | -0.28 | 9.63E-01 | no |
| Prm1          | 0.36   | 0.27   | -0.40 | 9.63E-01 | no |
| Rorc          | 0.05   | 0.04   | -0.40 | 9.63E-01 | no |
| C1ql3         | 0.04   | 0.03   | -0.50 | 9.63E-01 | no |
| Ccr4          | 0.04   | 0.03   | -0.51 | 9.63E-01 | no |
| Cstf2t        | 23.46  | 22.73  | -0.05 | 9.63E-01 | no |
| Nat1          | 0.22   | 0.26   | 0.25  | 9.63E-01 | no |
| Ddx41         | 33.08  | 34.16  | 0.05  | 9.63E-01 | no |
| Ralgps1       | 5.76   | 5.48   | -0.07 | 9.63E-01 | no |
| Prdx2         | 62.77  | 60.67  | -0.05 | 9.63E-01 | no |
| Tmem88        | 0.27   | 0.07   | -2.05 | 9.63E-01 | no |
| Slc23a3       | 0.20   | 0.23   | 0.20  | 9.63E-01 | no |
| Zfyve21       | 7.04   | 6.62   | -0.09 | 9.63E-01 | no |
| 2210408I21Rik | 1.42   | 1.53   | 0.11  | 9.63E-01 | no |
| Rnase9        | 0.25   | 0.29   | 0.25  | 9.63E-01 | no |
| Ficd          | 2.64   | 2.79   | 0.08  | 9.63E-01 | no |
| Camk2g        | 11.60  | 12.01  | 0.05  | 9.63E-01 | no |
| 1700123I01Rik | 0.11   | 0.09   | -0.36 | 9.63E-01 | no |

|               |       |       |       |          |    |
|---------------|-------|-------|-------|----------|----|
| Uqcrb         | 42.45 | 40.54 | -0.07 | 9.63E-01 | no |
| Kcnn1         | 0.04  | 0.05  | 0.32  | 9.64E-01 | no |
| 2310061I04Rik | 16.53 | 15.78 | -0.07 | 9.64E-01 | no |
| Anapc10       | 3.87  | 3.66  | -0.08 | 9.64E-01 | no |
| 2900060B14Ri  | 0.44  | 0.36  | -0.29 | 9.64E-01 | no |
| 4933431E20Ri  | 0.02  | 0.03  | 0.44  | 9.64E-01 | no |
| BC048355      | 15.75 | 15.00 | -0.07 | 9.64E-01 | no |
| Lym5          | 6.52  | 6.91  | 0.08  | 9.64E-01 | no |
| Fam155a       | 0.01  | 0.02  | 0.70  | 9.64E-01 | no |
| Tcam1         | 1.30  | 1.39  | 0.10  | 9.64E-01 | no |
| 1600002K03Ri  | 8.45  | 8.98  | 0.09  | 9.64E-01 | no |
| Tmem55a       | 9.12  | 9.56  | 0.07  | 9.64E-01 | no |
| Nfkbib        | 9.89  | 10.34 | 0.06  | 9.64E-01 | no |
| Zscan29       | 9.36  | 9.68  | 0.05  | 9.64E-01 | no |
| Apaf1         | 21.81 | 21.26 | -0.04 | 9.64E-01 | no |
| Myc           | 42.29 | 41.21 | -0.04 | 9.64E-01 | no |
| Gtl3          | 21.98 | 21.10 | -0.06 | 9.64E-01 | no |
| Fktn          | 2.49  | 2.35  | -0.09 | 9.64E-01 | no |
| C030016D13Ri  | 0.64  | 0.59  | -0.13 | 9.64E-01 | no |
| Caskin1       | 0.13  | 0.12  | -0.14 | 9.64E-01 | no |
| Cbln3         | 0.08  | 0.07  | -0.22 | 9.64E-01 | no |
| Ndn           | 0.16  | 0.13  | -0.28 | 9.64E-01 | no |
| Ttc30a2       | 1.43  | 1.53  | 0.10  | 9.64E-01 | no |
| Was           | 37.05 | 35.92 | -0.04 | 9.64E-01 | no |
| Yif1b         | 21.98 | 21.10 | -0.06 | 9.64E-01 | no |
| 0610037L13Ril | 10.35 | 9.86  | -0.07 | 9.64E-01 | no |
| Arpc1a        | 34.70 | 35.88 | 0.05  | 9.64E-01 | no |
| Abhd8         | 19.98 | 19.27 | -0.05 | 9.64E-01 | no |
| Aebp1         | 0.05  | 0.06  | 0.27  | 9.64E-01 | no |
| Nos1ap        | 0.17  | 0.19  | 0.22  | 9.64E-01 | no |
| Celf3         | 0.20  | 0.22  | 0.16  | 9.64E-01 | no |
| C8g           | 0.56  | 0.63  | 0.16  | 9.64E-01 | no |
| Lzts1         | 0.32  | 0.36  | 0.15  | 9.64E-01 | no |
| Nhlrc1        | 0.32  | 0.35  | 0.15  | 9.64E-01 | no |
| Decr1         | 5.03  | 5.29  | 0.07  | 9.64E-01 | no |
| Stxbp3a       | 9.50  | 9.94  | 0.06  | 9.64E-01 | no |
| Rpusd4        | 14.47 | 15.07 | 0.06  | 9.64E-01 | no |
| Apc           | 15.47 | 15.03 | -0.04 | 9.64E-01 | no |
| Tpp2          | 30.32 | 29.44 | -0.04 | 9.64E-01 | no |
| Srf           | 16.69 | 16.17 | -0.05 | 9.64E-01 | no |
| Reep5         | 25.80 | 24.97 | -0.05 | 9.64E-01 | no |
| Ndufb5        | 34.21 | 32.90 | -0.06 | 9.64E-01 | no |

|               |       |       |       |          |    |
|---------------|-------|-------|-------|----------|----|
| Mettl5        | 11.87 | 11.25 | -0.08 | 9.64E-01 | no |
| 2010000I03Rik | 2.84  | 2.68  | -0.08 | 9.64E-01 | no |
| Xylt2         | 5.72  | 5.98  | 0.06  | 9.65E-01 | no |
| Stim1         | 20.11 | 20.75 | 0.05  | 9.65E-01 | no |
| Mest          | 0.99  | 1.07  | 0.11  | 9.65E-01 | no |
| E230008N13Ri  | 0.03  | 0.02  | -0.35 | 9.65E-01 | no |
| 1-Sep         | 42.45 | 41.13 | -0.05 | 9.65E-01 | no |
| Ubxn2b        | 5.03  | 4.82  | -0.06 | 9.65E-01 | no |
| Tal1          | 0.59  | 0.55  | -0.11 | 9.65E-01 | no |
| Rab4b         | 23.38 | 24.31 | 0.06  | 9.65E-01 | no |
| Bbs9          | 6.93  | 6.65  | -0.06 | 9.65E-01 | no |
| Klhl35        | 0.06  | 0.07  | 0.40  | 9.65E-01 | no |
| Gpr161        | 0.09  | 0.11  | 0.32  | 9.65E-01 | no |
| Zfp957        | 0.27  | 0.29  | 0.14  | 9.65E-01 | no |
| Fbxl6         | 22.62 | 23.44 | 0.05  | 9.65E-01 | no |
| Angel2        | 33.58 | 32.75 | -0.04 | 9.65E-01 | no |
| Ccdc96        | 0.22  | 0.20  | -0.14 | 9.65E-01 | no |
| Pla2g10       | 0.17  | 0.14  | -0.35 | 9.65E-01 | no |
| Mtss1l        | 0.14  | 0.15  | 0.14  | 9.65E-01 | no |
| 2700078K21Ri  | 18.45 | 19.21 | 0.06  | 9.65E-01 | no |
| C030046E11Ri  | 14.75 | 14.31 | -0.04 | 9.65E-01 | no |
| Bhlha15       | 2.57  | 2.72  | 0.08  | 9.65E-01 | no |
| Irf8          | 50.18 | 51.63 | 0.04  | 9.65E-01 | no |
| Cttnbp2       | 0.02  | 0.02  | 0.37  | 9.65E-01 | no |
| Tmem38a       | 0.69  | 0.75  | 0.12  | 9.65E-01 | no |
| Lipo1         | 11.52 | 12.00 | 0.06  | 9.65E-01 | no |
| Strn4         | 26.16 | 25.50 | -0.04 | 9.65E-01 | no |
| Nek4          | 5.37  | 5.12  | -0.07 | 9.65E-01 | no |
| Gm10767       | 6.92  | 6.56  | -0.08 | 9.65E-01 | no |
| Gm3417        | 0.94  | 0.85  | -0.14 | 9.65E-01 | no |
| 1700019B03Ri  | 0.11  | 0.08  | -0.35 | 9.65E-01 | no |
| Col19a1       | 0.02  | 0.02  | -0.35 | 9.65E-01 | no |
| Mgll          | 4.33  | 4.13  | -0.07 | 9.65E-01 | no |
| Cdh22         | 0.11  | 0.12  | 0.18  | 9.66E-01 | no |
| Abcb8         | 12.87 | 12.41 | -0.05 | 9.66E-01 | no |
| Tmbim6        | 93.38 | 91.19 | -0.03 | 9.66E-01 | no |
| Fam49a        | 6.09  | 5.85  | -0.06 | 9.66E-01 | no |
| Gm10136       | 31.64 | 30.18 | -0.07 | 9.66E-01 | no |
| A930004D18R   | 0.02  | 0.03  | 0.89  | 9.66E-01 | no |
| Solh          | 12.83 | 13.28 | 0.05  | 9.66E-01 | no |
| Bak1          | 33.40 | 34.45 | 0.04  | 9.66E-01 | no |
| Ap3s2         | 11.17 | 10.82 | -0.05 | 9.66E-01 | no |



|              |       |       |       |          |    |
|--------------|-------|-------|-------|----------|----|
| Elp4         | 4.45  | 4.24  | -0.07 | 9.66E-01 | no |
| Rdh9         | 0.04  | 0.03  | -0.54 | 9.66E-01 | no |
| Mkl2         | 7.38  | 9.97  | 0.43  | 9.66E-01 | no |
| Thumpd3      | 22.24 | 21.49 | -0.05 | 9.66E-01 | no |
| Adam3        | 0.04  | 0.03  | -0.48 | 9.66E-01 | no |
| Cxcl10       | 0.08  | 0.11  | 0.41  | 9.66E-01 | no |
| Zfp36        | 44.34 | 45.71 | 0.04  | 9.66E-01 | no |
| LOC100302567 | 6.68  | 5.73  | -0.22 | 9.66E-01 | no |
| Dynlt1f      | 0.07  | 0.04  | -0.74 | 9.66E-01 | no |
| Cdk9         | 31.88 | 32.81 | 0.04  | 9.66E-01 | no |
| Tusc2        | 14.31 | 13.73 | -0.06 | 9.66E-01 | no |
| Atf7         | 8.58  | 8.22  | -0.06 | 9.66E-01 | no |
| 1700012B15Ri | 8.80  | 9.27  | 0.08  | 9.66E-01 | no |
| Tmem86b      | 13.62 | 14.26 | 0.07  | 9.66E-01 | no |
| Dnajb12      | 16.44 | 15.82 | -0.05 | 9.66E-01 | no |
| Med12        | 19.52 | 18.98 | -0.04 | 9.67E-01 | no |
| Hspb2        | 0.09  | 0.13  | 0.46  | 9.67E-01 | no |
| Ankrd13c     | 16.84 | 16.26 | -0.05 | 9.67E-01 | no |
| Zfp738       | 8.07  | 8.38  | 0.05  | 9.67E-01 | no |
| Rpl22        | 69.00 | 70.96 | 0.04  | 9.67E-01 | no |
| Zfp236       | 13.77 | 13.38 | -0.04 | 9.67E-01 | no |
| Slc35a1      | 9.73  | 9.30  | -0.06 | 9.67E-01 | no |
| Apcdd1       | 0.77  | 0.72  | -0.11 | 9.67E-01 | no |
| Gm9731       | 0.04  | 0.06  | 0.65  | 9.67E-01 | no |
| Rnf128       | 0.03  | 0.05  | 0.50  | 9.67E-01 | no |
| Abcd2        | 0.19  | 0.21  | 0.14  | 9.67E-01 | no |
| 6330403A02Ri | 0.22  | 0.24  | 0.13  | 9.67E-01 | no |
| Zfp580       | 1.28  | 1.39  | 0.12  | 9.67E-01 | no |
| Glis2        | 0.80  | 0.86  | 0.10  | 9.67E-01 | no |
| Apbb2        | 1.82  | 1.92  | 0.08  | 9.67E-01 | no |
| Pdp2         | 5.93  | 6.19  | 0.06  | 9.67E-01 | no |
| Kif1b        | 2.14  | 2.23  | 0.06  | 9.67E-01 | no |
| 2810021B07Ri | 13.33 | 13.84 | 0.05  | 9.67E-01 | no |
| Arfrp1       | 17.96 | 18.55 | 0.05  | 9.67E-01 | no |
| Scamp2       | 30.93 | 31.89 | 0.04  | 9.67E-01 | no |
| Itrip        | 17.16 | 17.68 | 0.04  | 9.67E-01 | no |
| Fermt3       | 44.12 | 45.36 | 0.04  | 9.67E-01 | no |
| Pdia3        | 57.95 | 59.57 | 0.04  | 9.67E-01 | no |
| Nckap1l      | 52.90 | 54.37 | 0.04  | 9.67E-01 | no |
| Wsb1         | 56.07 | 54.69 | -0.04 | 9.67E-01 | no |
| Med15        | 26.51 | 25.84 | -0.04 | 9.67E-01 | no |
| Trim44       | 31.24 | 30.40 | -0.04 | 9.67E-01 | no |

|              |       |       |       |          |    |
|--------------|-------|-------|-------|----------|----|
| Ythdc1       | 35.91 | 34.91 | -0.04 | 9.67E-01 | no |
| Mat2b        | 39.10 | 37.98 | -0.04 | 9.67E-01 | no |
| Cecr2        | 61.16 | 59.38 | -0.04 | 9.67E-01 | no |
| Arih2        | 16.40 | 15.90 | -0.04 | 9.67E-01 | no |
| Ttll12       | 15.02 | 14.55 | -0.05 | 9.67E-01 | no |
| Sufu         | 16.08 | 15.55 | -0.05 | 9.67E-01 | no |
| Erp44        | 18.85 | 18.21 | -0.05 | 9.67E-01 | no |
| Dhx35        | 9.61  | 9.25  | -0.05 | 9.67E-01 | no |
| Mfsd7b       | 7.32  | 7.04  | -0.06 | 9.67E-01 | no |
| Tmem219      | 14.13 | 13.50 | -0.07 | 9.67E-01 | no |
| Ict1         | 19.40 | 18.54 | -0.07 | 9.67E-01 | no |
| Qtrt1        | 9.76  | 9.30  | -0.07 | 9.67E-01 | no |
| A430033K04Ri | 4.43  | 4.22  | -0.07 | 9.67E-01 | no |
| Shq1         | 4.74  | 4.50  | -0.07 | 9.67E-01 | no |
| 4931440F15Ri | 2.36  | 2.23  | -0.08 | 9.67E-01 | no |
| Fbxo36       | 1.31  | 1.20  | -0.12 | 9.67E-01 | no |
| Garnl3       | 0.10  | 0.09  | -0.23 | 9.67E-01 | no |
| Slc6a17      | 0.04  | 0.03  | -0.24 | 9.67E-01 | no |
| Pate2        | 0.13  | 0.11  | -0.25 | 9.67E-01 | no |
| Podxl        | 0.04  | 0.03  | -0.28 | 9.67E-01 | no |
| Pkdrej       | 0.01  | 0.01  | -0.47 | 9.67E-01 | no |
| 3110040N11Ri | 8.71  | 9.20  | 0.08  | 9.68E-01 | no |
| Crtc2        | 22.92 | 22.22 | -0.04 | 9.68E-01 | no |
| Srpx         | 0.04  | 0.03  | -0.46 | 9.68E-01 | no |
| Akr7a5       | 8.30  | 7.92  | -0.07 | 9.68E-01 | no |
| Clcn3        | 16.90 | 16.48 | -0.04 | 9.68E-01 | no |
| Ccdc107      | 20.06 | 19.20 | -0.06 | 9.68E-01 | no |
| Nat9         | 6.92  | 6.57  | -0.07 | 9.68E-01 | no |
| Dpp3         | 30.47 | 29.60 | -0.04 | 9.68E-01 | no |
| Sec23a       | 9.64  | 9.30  | -0.05 | 9.68E-01 | no |
| Wfikkn2      | 0.13  | 0.15  | 0.16  | 9.68E-01 | no |
| Zfp128       | 2.33  | 2.46  | 0.08  | 9.68E-01 | no |
| Sc4mol       | 8.81  | 9.23  | 0.07  | 9.68E-01 | no |
| Mon1a        | 10.20 | 10.61 | 0.06  | 9.68E-01 | no |
| Zfp26        | 9.68  | 9.41  | -0.04 | 9.68E-01 | no |
| Mrpl33       | 30.73 | 29.32 | -0.07 | 9.68E-01 | no |
| Clrn3        | 0.04  | 0.02  | -0.54 | 9.68E-01 | no |
| Fam109a      | 3.63  | 3.82  | 0.07  | 9.68E-01 | no |
| E030024N20Ri | 0.06  | 0.07  | 0.20  | 9.68E-01 | no |
| Meis1        | 2.59  | 2.45  | -0.08 | 9.68E-01 | no |
| Urgcp        | 5.29  | 5.48  | 0.05  | 9.69E-01 | no |
| Gpr31c       | 0.05  | 0.07  | 0.64  | 9.69E-01 | no |

|              |       |       |       |          |    |
|--------------|-------|-------|-------|----------|----|
| Il17rd       | 0.01  | 0.02  | 0.38  | 9.69E-01 | no |
| 4930432K21Ri | 0.58  | 0.63  | 0.12  | 9.69E-01 | no |
| Hif1an       | 16.61 | 17.08 | 0.04  | 9.69E-01 | no |
| Oprm1        | 0.02  | 0.03  | 0.63  | 9.69E-01 | no |
| Asb7         | 6.72  | 6.96  | 0.05  | 9.69E-01 | no |
| Slc35b2      | 20.02 | 20.69 | 0.05  | 9.69E-01 | no |
| Slc4a7       | 18.09 | 18.61 | 0.04  | 9.69E-01 | no |
| Mios         | 15.09 | 14.62 | -0.05 | 9.69E-01 | no |
| Dtwd1        | 6.94  | 6.59  | -0.07 | 9.69E-01 | no |
| Ube2d1       | 13.75 | 14.35 | 0.06  | 9.69E-01 | no |
| Chchd4       | 14.78 | 15.43 | 0.06  | 9.69E-01 | no |
| Dync1h1      | 30.60 | 31.46 | 0.04  | 9.69E-01 | no |
| Twistnb      | 16.20 | 15.62 | -0.05 | 9.69E-01 | no |
| BC031181     | 31.63 | 30.47 | -0.05 | 9.69E-01 | no |
| Lym1         | 1.29  | 1.19  | -0.11 | 9.69E-01 | no |
| Nrg2         | 0.24  | 0.21  | -0.15 | 9.69E-01 | no |
| 1810010H24Ri | 0.31  | 0.27  | -0.22 | 9.69E-01 | no |
| Ak7          | 0.06  | 0.07  | 0.26  | 9.69E-01 | no |
| Spnb3        | 0.23  | 0.25  | 0.10  | 9.69E-01 | no |
| Cd3e         | 0.07  | 0.05  | -0.45 | 9.70E-01 | no |
| Pde6d        | 18.37 | 17.64 | -0.06 | 9.70E-01 | no |
| Kcnk10       | 0.98  | 0.92  | -0.10 | 9.70E-01 | no |
| Clasrp       | 17.96 | 18.55 | 0.05  | 9.70E-01 | no |
| D830046C22Ri | 0.37  | 0.93  | 1.31  | 9.70E-01 | no |
| Fam161a      | 0.24  | 0.26  | 0.16  | 9.70E-01 | no |
| Eftud1       | 8.30  | 8.59  | 0.05  | 9.70E-01 | no |
| Apold1       | 2.26  | 2.14  | -0.08 | 9.70E-01 | no |
| Cort         | 0.73  | 0.83  | 0.19  | 9.70E-01 | no |
| Ifit2        | 9.61  | 9.95  | 0.05  | 9.70E-01 | no |
| Mgea5        | 47.97 | 46.73 | -0.04 | 9.70E-01 | no |
| Zfp623       | 2.21  | 2.09  | -0.08 | 9.70E-01 | no |
| Serf1        | 5.66  | 5.32  | -0.09 | 9.70E-01 | no |
| Atp2c2       | 0.07  | 0.06  | -0.25 | 9.70E-01 | no |
| Clip3        | 0.07  | 0.08  | 0.24  | 9.70E-01 | no |
| C030048B08Ri | 7.92  | 8.26  | 0.06  | 9.70E-01 | no |
| Ssbp4        | 20.49 | 21.20 | 0.05  | 9.70E-01 | no |
| C1galt1      | 65.64 | 67.42 | 0.04  | 9.70E-01 | no |
| 1110049F12Ri | 19.08 | 18.40 | -0.05 | 9.70E-01 | no |
| Fam122a      | 11.16 | 10.70 | -0.06 | 9.70E-01 | no |
| Nefh         | 2.17  | 2.07  | -0.07 | 9.70E-01 | no |
| Nipal1       | 0.03  | 0.02  | -0.46 | 9.70E-01 | no |
| Rab5b        | 37.72 | 36.72 | -0.04 | 9.70E-01 | no |

|               |       |       |       |          |    |
|---------------|-------|-------|-------|----------|----|
| 2810021J22RiI | 3.02  | 3.16  | 0.06  | 9.70E-01 | no |
| Commd3        | 32.95 | 34.18 | 0.05  | 9.70E-01 | no |
| Gcom1         | 5.18  | 4.93  | -0.07 | 9.71E-01 | no |
| Dynlt1b       | 0.43  | 0.49  | 0.19  | 9.71E-01 | no |
| Evi2b         | 16.03 | 16.89 | 0.08  | 9.71E-01 | no |
| Slc16a3       | 0.73  | 0.68  | -0.11 | 9.71E-01 | no |
| Tbce          | 15.33 | 15.90 | 0.05  | 9.71E-01 | no |
| Prkcsh        | 31.85 | 30.96 | -0.04 | 9.71E-01 | no |
| Dnm1          | 0.02  | 0.03  | 0.47  | 9.71E-01 | no |
| Zfp784        | 3.68  | 3.87  | 0.07  | 9.71E-01 | no |
| Xpr1          | 12.67 | 13.03 | 0.04  | 9.71E-01 | no |
| Cltc          | 60.73 | 62.33 | 0.04  | 9.71E-01 | no |
| Cdr2l         | 0.02  | 0.03  | 0.47  | 9.71E-01 | no |
| Tnfaip8l3     | 0.09  | 0.10  | 0.29  | 9.71E-01 | no |
| Tlr8          | 0.18  | 0.20  | 0.16  | 9.71E-01 | no |
| Bcl3          | 2.49  | 2.64  | 0.08  | 9.71E-01 | no |
| B3gnt1        | 4.63  | 4.86  | 0.07  | 9.71E-01 | no |
| Cars2         | 11.32 | 11.76 | 0.06  | 9.71E-01 | no |
| Zfp330        | 27.62 | 28.51 | 0.05  | 9.71E-01 | no |
| Rnase11       | 0.21  | 0.26  | 0.31  | 9.71E-01 | no |
| 4930483J18RiI | 0.13  | 0.16  | 0.30  | 9.71E-01 | no |
| Shroom4       | 0.06  | 0.07  | 0.21  | 9.71E-01 | no |
| A530054K11Ri  | 8.66  | 8.95  | 0.05  | 9.71E-01 | no |
| Rpl24         | 94.47 | 91.81 | -0.04 | 9.71E-01 | no |
| Tchp          | 10.88 | 10.52 | -0.05 | 9.71E-01 | no |
| Fbxl22        | 1.71  | 1.62  | -0.08 | 9.71E-01 | no |
| 9930111J21RiI | 10.53 | 9.93  | -0.08 | 9.71E-01 | no |
| Zfp142        | 8.37  | 7.73  | -0.11 | 9.71E-01 | no |
| Ifitm5        | 0.51  | 0.45  | -0.18 | 9.71E-01 | no |
| Gm7187        | 0.27  | 0.24  | -0.18 | 9.71E-01 | no |
| Pkp2          | 0.12  | 0.11  | -0.19 | 9.71E-01 | no |
| Ctla4         | 0.06  | 0.04  | -0.51 | 9.71E-01 | no |
| 3110007F17Ri  | 1.24  | 1.35  | 0.12  | 9.71E-01 | no |
| Scarna13      | 1.57  | 1.76  | 0.17  | 9.72E-01 | no |
| Alg11         | 6.65  | 6.98  | 0.07  | 9.72E-01 | no |
| Nsa2          | 15.67 | 16.20 | 0.05  | 9.72E-01 | no |
| Rbm18         | 15.26 | 15.76 | 0.05  | 9.72E-01 | no |
| Ssu72         | 28.27 | 29.17 | 0.05  | 9.72E-01 | no |
| Pcsk7         | 13.52 | 13.92 | 0.04  | 9.72E-01 | no |
| Crbn          | 16.92 | 16.46 | -0.04 | 9.72E-01 | no |
| Zfp512        | 19.66 | 19.10 | -0.04 | 9.72E-01 | no |
| Zfp87         | 12.12 | 11.71 | -0.05 | 9.72E-01 | no |

|               |       |       |       |          |    |
|---------------|-------|-------|-------|----------|----|
| Armc9         | 3.15  | 3.02  | -0.06 | 9.72E-01 | no |
| Slc46a3       | 1.40  | 1.32  | -0.09 | 9.72E-01 | no |
| 3300002108Rik | 0.87  | 0.78  | -0.15 | 9.72E-01 | no |
| Dgat2         | 0.54  | 0.50  | -0.11 | 9.72E-01 | no |
| Ndnl2         | 12.43 | 12.94 | 0.06  | 9.72E-01 | no |
| Rarb          | 0.63  | 0.58  | -0.10 | 9.72E-01 | no |
| Stx19         | 0.32  | 0.36  | 0.17  | 9.72E-01 | no |
| Mmp13         | 1.13  | 1.20  | 0.09  | 9.72E-01 | no |
| Napsa         | 30.82 | 31.77 | 0.04  | 9.72E-01 | no |
| Fkrp          | 12.40 | 12.00 | -0.05 | 9.72E-01 | no |
| Ccdc75        | 4.53  | 4.35  | -0.06 | 9.72E-01 | no |
| Ift57         | 5.28  | 5.04  | -0.06 | 9.72E-01 | no |
| Ccr2          | 3.02  | 2.87  | -0.07 | 9.72E-01 | no |
| Igfbp5        | 0.03  | 0.02  | -0.31 | 9.72E-01 | no |
| Lrch2         | 0.03  | 0.02  | -0.51 | 9.72E-01 | no |
| Ptgs2         | 0.03  | 0.02  | -0.51 | 9.72E-01 | no |
| Syt15         | 0.05  | 0.06  | 0.27  | 9.72E-01 | no |
| Ddx25         | 0.15  | 0.17  | 0.23  | 9.72E-01 | no |
| B930003M22R   | 1.04  | 1.13  | 0.11  | 9.72E-01 | no |
| C430048L16Ri  | 17.43 | 17.95 | 0.04  | 9.72E-01 | no |
| 1110038D17Ri  | 11.62 | 11.24 | -0.05 | 9.72E-01 | no |
| Stard6        | 1.08  | 1.00  | -0.11 | 9.72E-01 | no |
| Rin2          | 0.66  | 0.62  | -0.09 | 9.72E-01 | no |
| Tm9sf2        | 36.45 | 35.50 | -0.04 | 9.72E-01 | no |
| Atp6v0e       | 36.90 | 35.59 | -0.05 | 9.72E-01 | no |
| Arhgap12      | 11.97 | 11.65 | -0.04 | 9.72E-01 | no |
| 0610009O20Ri  | 22.99 | 22.34 | -0.04 | 9.72E-01 | no |
| Ccdc45        | 12.41 | 12.02 | -0.05 | 9.73E-01 | no |
| Prmt10        | 14.15 | 13.70 | -0.05 | 9.73E-01 | no |
| Hagh          | 5.56  | 5.84  | 0.07  | 9.73E-01 | no |
| Mterfd3       | 12.38 | 11.90 | -0.06 | 9.73E-01 | no |
| Crygn         | 0.27  | 0.32  | 0.27  | 9.73E-01 | no |
| Hdgfrp3       | 2.21  | 2.32  | 0.07  | 9.73E-01 | no |
| Manbal        | 14.74 | 15.34 | 0.06  | 9.73E-01 | no |
| 2700078E11Ri  | 20.02 | 20.50 | 0.03  | 9.73E-01 | no |
| Ccdc36        | 0.43  | 0.40  | -0.11 | 9.73E-01 | no |
| Irf3          | 28.27 | 27.49 | -0.04 | 9.73E-01 | no |
| Tmem111       | 27.32 | 26.54 | -0.04 | 9.73E-01 | no |
| Tpte          | 0.04  | 0.03  | -0.50 | 9.73E-01 | no |
| Ccdc12        | 30.77 | 31.82 | 0.05  | 9.73E-01 | no |
| Notch3        | 0.15  | 0.16  | 0.11  | 9.73E-01 | no |
| Lrrc68        | 17.34 | 17.83 | 0.04  | 9.73E-01 | no |

|              |       |       |       |          |    |
|--------------|-------|-------|-------|----------|----|
| Lilrb3       | 0.56  | 0.52  | -0.10 | 9.73E-01 | no |
| Nme5         | 0.10  | 0.14  | 0.45  | 9.74E-01 | no |
| Pip5k1l      | 0.05  | 0.07  | 0.45  | 9.74E-01 | no |
| 1700019E19Ri | 0.14  | 0.18  | 0.41  | 9.74E-01 | no |
| Anpep        | 0.05  | 0.06  | 0.26  | 9.74E-01 | no |
| Sqrdl        | 0.47  | 0.52  | 0.12  | 9.74E-01 | no |
| A330069E16Ri | 0.95  | 1.03  | 0.12  | 9.74E-01 | no |
| Samd14       | 0.24  | 0.26  | 0.12  | 9.74E-01 | no |
| Prss16       | 1.01  | 1.08  | 0.09  | 9.74E-01 | no |
| 2310028H24Ri | 4.11  | 4.30  | 0.07  | 9.74E-01 | no |
| Pik3r2       | 12.06 | 12.43 | 0.04  | 9.74E-01 | no |
| Zfp800       | 14.55 | 14.98 | 0.04  | 9.74E-01 | no |
| Btbd7        | 11.61 | 11.95 | 0.04  | 9.74E-01 | no |
| Gigyf2       | 19.38 | 19.78 | 0.03  | 9.74E-01 | no |
| Atp11b       | 32.87 | 32.08 | -0.04 | 9.74E-01 | no |
| Per1         | 8.41  | 8.17  | -0.04 | 9.74E-01 | no |
| Akap1        | 10.53 | 10.22 | -0.04 | 9.74E-01 | no |
| Fastkd2      | 9.36  | 9.04  | -0.05 | 9.74E-01 | no |
| Yrdc         | 15.67 | 15.12 | -0.05 | 9.74E-01 | no |
| Zkscan5      | 5.61  | 5.41  | -0.05 | 9.74E-01 | no |
| Nek1         | 5.77  | 5.56  | -0.05 | 9.74E-01 | no |
| Trit1        | 9.33  | 8.98  | -0.06 | 9.74E-01 | no |
| Brf2         | 9.52  | 9.12  | -0.06 | 9.74E-01 | no |
| Zfp768       | 4.35  | 4.16  | -0.07 | 9.74E-01 | no |
| Senp8        | 2.84  | 2.71  | -0.07 | 9.74E-01 | no |
| Nhsl2        | 0.58  | 0.55  | -0.07 | 9.74E-01 | no |
| Ovgp1        | 1.77  | 1.67  | -0.08 | 9.74E-01 | no |
| C1ra         | 0.57  | 0.53  | -0.10 | 9.74E-01 | no |
| Snai3        | 0.13  | 0.11  | -0.24 | 9.74E-01 | no |
| Hoxb5        | 0.10  | 0.08  | -0.30 | 9.74E-01 | no |
| Nxn1l        | 0.06  | 0.05  | -0.30 | 9.74E-01 | no |
| Fam166a      | 0.12  | 0.10  | -0.30 | 9.74E-01 | no |
| Scarna3a     | 1.40  | 1.11  | -0.34 | 9.74E-01 | no |
| Pcdh17       | 0.01  | 0.01  | -0.41 | 9.74E-01 | no |
| Vmn2r1       | 0.02  | 0.02  | -0.61 | 9.74E-01 | no |
| Srprb        | 17.89 | 18.41 | 0.04  | 9.74E-01 | no |
| Zfp687       | 16.02 | 16.44 | 0.04  | 9.74E-01 | no |
| LOC100134990 | 2.19  | 2.34  | 0.10  | 9.74E-01 | no |
| Wdr5b        | 10.11 | 9.71  | -0.06 | 9.74E-01 | no |
| Gm4971       | 0.10  | 0.12  | 0.34  | 9.74E-01 | no |
| Pkd1l2       | 0.02  | 0.03  | 0.26  | 9.74E-01 | no |
| Igfbp1       | 27.35 | 28.17 | 0.04  | 9.74E-01 | no |

|              |       |       |       |          |    |
|--------------|-------|-------|-------|----------|----|
| Zranb1       | 21.27 | 20.64 | -0.04 | 9.74E-01 | no |
| Prkab1       | 16.80 | 16.28 | -0.05 | 9.74E-01 | no |
| Srcrb4d      | 0.42  | 0.39  | -0.11 | 9.74E-01 | no |
| Slc16a6      | 7.79  | 8.04  | 0.05  | 9.74E-01 | no |
| Dhrs2        | 0.13  | 0.16  | 0.26  | 9.74E-01 | no |
| Cyb561d2     | 6.80  | 7.10  | 0.06  | 9.74E-01 | no |
| Khynyn       | 25.10 | 25.73 | 0.04  | 9.74E-01 | no |
| Foxk1        | 14.98 | 15.35 | 0.04  | 9.74E-01 | no |
| Adar         | 27.55 | 28.05 | 0.03  | 9.74E-01 | no |
| Tmem131      | 26.01 | 25.40 | -0.03 | 9.74E-01 | no |
| Phf1         | 12.96 | 12.55 | -0.05 | 9.74E-01 | no |
| Thap4        | 13.08 | 12.66 | -0.05 | 9.74E-01 | no |
| Zpbp         | 0.71  | 0.66  | -0.10 | 9.74E-01 | no |
| Dnajb3       | 1.70  | 1.59  | -0.10 | 9.74E-01 | no |
| Gm14005      | 0.35  | 0.30  | -0.23 | 9.74E-01 | no |
| Trpc6        | 0.03  | 0.02  | -0.41 | 9.74E-01 | no |
| Nudcd3       | 27.54 | 26.87 | -0.04 | 9.74E-01 | no |
| 3110043O21Ri | 2.46  | 2.34  | -0.07 | 9.74E-01 | no |
| Glis1        | 0.07  | 0.06  | -0.24 | 9.74E-01 | no |
| Arntl2       | 0.05  | 0.06  | 0.43  | 9.74E-01 | no |
| Bfsp1        | 0.12  | 0.14  | 0.19  | 9.74E-01 | no |
| Lipt1        | 2.30  | 2.43  | 0.08  | 9.74E-01 | no |
| Phax         | 15.33 | 15.83 | 0.05  | 9.74E-01 | no |
| Tox4         | 25.28 | 25.91 | 0.04  | 9.74E-01 | no |
| Tlr6         | 3.37  | 3.21  | -0.07 | 9.74E-01 | no |
| Ptrh1        | 2.20  | 2.07  | -0.09 | 9.74E-01 | no |
| Rps6ka6      | 0.10  | 0.09  | -0.18 | 9.74E-01 | no |
| Bglap-rs1    | 0.09  | 0.06  | -0.61 | 9.74E-01 | no |
| Il17c        | 0.38  | 0.33  | -0.21 | 9.74E-01 | no |
| Smarca1      | 0.03  | 0.04  | 0.31  | 9.74E-01 | no |
| Plekha7      | 0.52  | 0.55  | 0.09  | 9.74E-01 | no |
| Krtcap2      | 37.03 | 38.46 | 0.05  | 9.74E-01 | no |
| 4930525F21Ri | 0.06  | 0.05  | -0.40 | 9.74E-01 | no |
| Wwc2         | 4.54  | 4.70  | 0.05  | 9.74E-01 | no |
| Nfe2         | 2.10  | 1.98  | -0.08 | 9.74E-01 | no |
| Ern1         | 3.86  | 3.71  | -0.06 | 9.75E-01 | no |
| Klhl30       | 0.06  | 0.07  | 0.25  | 9.75E-01 | no |
| Cd82         | 16.48 | 17.00 | 0.05  | 9.75E-01 | no |
| Gcdh         | 12.64 | 12.24 | -0.05 | 9.75E-01 | no |
| 4931428F04Ri | 5.46  | 5.26  | -0.05 | 9.75E-01 | no |
| Thbs1        | 0.21  | 0.19  | -0.11 | 9.75E-01 | no |
| Vwa1         | 0.06  | 0.05  | -0.26 | 9.75E-01 | no |

|              |        |        |       |          |    |
|--------------|--------|--------|-------|----------|----|
| Chrn4        | 0.03   | 0.02   | -0.40 | 9.75E-01 | no |
| Rps10        | 601.24 | 587.28 | -0.03 | 9.75E-01 | no |
| Selk         | 13.97  | 13.41  | -0.06 | 9.75E-01 | no |
| Abca13       | 0.02   | 0.02   | 0.21  | 9.75E-01 | no |
| 2310046O06Ri | 9.88   | 9.57   | -0.05 | 9.75E-01 | no |
| Gpatch1      | 7.14   | 6.90   | -0.05 | 9.75E-01 | no |
| Chit1        | 0.09   | 0.07   | -0.29 | 9.75E-01 | no |
| Rab35        | 33.16  | 34.02  | 0.04  | 9.75E-01 | no |
| Ifngr1       | 22.71  | 22.07  | -0.04 | 9.75E-01 | no |
| Rraga        | 24.87  | 24.14  | -0.04 | 9.75E-01 | no |
| Nrbf2        | 18.09  | 17.53  | -0.05 | 9.75E-01 | no |
| Tiam2        | 2.12   | 2.04   | -0.06 | 9.75E-01 | no |
| Camk4        | 0.23   | 0.22   | -0.09 | 9.75E-01 | no |
| Tmem19       | 10.24  | 10.57  | 0.05  | 9.75E-01 | no |
| 4632427E13Ri | 1.11   | 1.03   | -0.12 | 9.75E-01 | no |
| Arnt         | 19.90  | 19.46  | -0.03 | 9.76E-01 | no |
| Sugp1        | 16.27  | 16.74  | 0.04  | 9.76E-01 | no |
| Gm8817       | 0.15   | 0.20   | 0.42  | 9.76E-01 | no |
| Efcab9       | 1.21   | 1.31   | 0.11  | 9.76E-01 | no |
| Atp1a1       | 39.86  | 40.79  | 0.03  | 9.76E-01 | no |
| Tmem184c     | 16.91  | 16.43  | -0.04 | 9.76E-01 | no |
| Rpl15        | 18.64  | 18.05  | -0.05 | 9.76E-01 | no |
| Epb4.1l3     | 0.08   | 0.08   | -0.17 | 9.76E-01 | no |
| Rbm26        | 25.08  | 24.48  | -0.03 | 9.76E-01 | no |
| Slc25a19     | 13.10  | 12.64  | -0.05 | 9.76E-01 | no |
| Tmem41b      | 9.48   | 9.18   | -0.05 | 9.77E-01 | no |
| Gprc5b       | 1.25   | 2.07   | 0.73  | 9.77E-01 | no |
| Rala         | 18.87  | 18.35  | -0.04 | 9.78E-01 | no |
| Bag2         | 7.28   | 7.57   | 0.06  | 9.78E-01 | no |
| Fam183b      | 0.43   | 0.36   | -0.28 | 9.78E-01 | no |
| Plbd1        | 0.98   | 1.04   | 0.09  | 9.78E-01 | no |
| C1qtnf1      | 0.08   | 0.09   | 0.21  | 9.78E-01 | no |
| Prss36       | 0.73   | 0.77   | 0.08  | 9.78E-01 | no |
| Rftn1        | 23.93  | 24.53  | 0.04  | 9.78E-01 | no |
| 4933439F18Ri | 17.59  | 17.16  | -0.04 | 9.78E-01 | no |
| Usp11        | 25.16  | 24.56  | -0.03 | 9.78E-01 | no |
| Lyplal1      | 0.74   | 0.69   | -0.11 | 9.78E-01 | no |
| Nipbl        | 52.34  | 51.30  | -0.03 | 9.78E-01 | no |
| Akap8l       | 20.94  | 20.37  | -0.04 | 9.79E-01 | no |
| Gp1bb        | 0.02   | 0.03   | 0.77  | 9.79E-01 | no |
| Trim46       | 0.36   | 0.39   | 0.11  | 9.79E-01 | no |
| Ptger3       | 0.05   | 0.04   | -0.38 | 9.79E-01 | no |



|               |       |       |       |          |    |
|---------------|-------|-------|-------|----------|----|
| Lrrc34        | 0.05  | 0.06  | 0.40  | 9.79E-01 | no |
| Sfrp2         | 0.06  | 0.07  | 0.27  | 9.79E-01 | no |
| Trem2         | 0.13  | 0.15  | 0.26  | 9.79E-01 | no |
| Ankrd42       | 0.05  | 0.06  | 0.24  | 9.79E-01 | no |
| Scgb3a1       | 0.44  | 0.51  | 0.21  | 9.79E-01 | no |
| Tnfsf4        | 0.19  | 0.21  | 0.18  | 9.79E-01 | no |
| Zswim5        | 0.06  | 0.07  | 0.17  | 9.79E-01 | no |
| 1700061G19Ri  | 0.24  | 0.26  | 0.12  | 9.79E-01 | no |
| Ggt5          | 0.50  | 0.54  | 0.09  | 9.79E-01 | no |
| Mthfs         | 6.78  | 7.11  | 0.07  | 9.79E-01 | no |
| Srrd          | 5.96  | 6.23  | 0.06  | 9.79E-01 | no |
| Mks1          | 3.13  | 3.27  | 0.06  | 9.79E-01 | no |
| AU022252      | 4.80  | 5.00  | 0.06  | 9.79E-01 | no |
| Bad           | 10.46 | 10.84 | 0.05  | 9.79E-01 | no |
| Yipf1         | 17.91 | 18.52 | 0.05  | 9.79E-01 | no |
| BC023814      | 14.06 | 14.46 | 0.04  | 9.79E-01 | no |
| Minpp1        | 18.45 | 18.94 | 0.04  | 9.79E-01 | no |
| Efhd2         | 23.01 | 23.60 | 0.04  | 9.79E-01 | no |
| Tmem55b       | 34.54 | 35.35 | 0.03  | 9.79E-01 | no |
| Smg1          | 37.32 | 38.20 | 0.03  | 9.79E-01 | no |
| Szt2          | 17.50 | 17.13 | -0.03 | 9.79E-01 | no |
| Becn1         | 41.95 | 40.99 | -0.03 | 9.79E-01 | no |
| Fem1c         | 22.51 | 21.94 | -0.04 | 9.79E-01 | no |
| Zfand6        | 36.81 | 35.87 | -0.04 | 9.79E-01 | no |
| Taf8          | 16.50 | 16.07 | -0.04 | 9.79E-01 | no |
| Twf1          | 12.17 | 11.82 | -0.04 | 9.79E-01 | no |
| Bscl2         | 14.71 | 14.29 | -0.04 | 9.79E-01 | no |
| BC017158      | 11.72 | 11.37 | -0.04 | 9.79E-01 | no |
| Dhodh         | 9.55  | 9.24  | -0.05 | 9.79E-01 | no |
| Rab11fip1     | 1.97  | 1.90  | -0.05 | 9.79E-01 | no |
| Snopc5        | 18.46 | 17.78 | -0.05 | 9.79E-01 | no |
| Zfp862        | 2.15  | 2.07  | -0.06 | 9.79E-01 | no |
| Pusl1         | 9.02  | 8.67  | -0.06 | 9.79E-01 | no |
| Top1mt        | 3.16  | 3.02  | -0.07 | 9.79E-01 | no |
| E330009J07RiI | 3.22  | 3.07  | -0.07 | 9.79E-01 | no |
| Slfn4         | 1.59  | 1.52  | -0.07 | 9.79E-01 | no |
| Trim62        | 1.20  | 1.14  | -0.07 | 9.79E-01 | no |
| Cdkl5         | 1.26  | 1.20  | -0.07 | 9.79E-01 | no |
| Fads3         | 1.35  | 1.27  | -0.08 | 9.79E-01 | no |
| Clec11a       | 0.26  | 0.24  | -0.14 | 9.79E-01 | no |
| 0610040J01RiI | 0.19  | 0.17  | -0.16 | 9.79E-01 | no |
| Cpeb3         | 0.08  | 0.07  | -0.16 | 9.79E-01 | no |

|              |       |       |       |          |    |
|--------------|-------|-------|-------|----------|----|
| Bmp8a        | 0.11  | 0.09  | -0.23 | 9.79E-01 | no |
| Doc2b        | 0.04  | 0.03  | -0.27 | 9.79E-01 | no |
| Klrc2        | 0.15  | 0.11  | -0.43 | 9.79E-01 | no |
| Tspan1       | 0.05  | 0.04  | -0.45 | 9.79E-01 | no |
| Hist2h2aa2   | 0.91  | 0.54  | -0.74 | 9.79E-01 | no |
| Ccnyl1       | 3.46  | 3.32  | -0.06 | 9.79E-01 | no |
| Fam19a3      | 0.04  | 0.05  | 0.23  | 9.79E-01 | no |
| Carf         | 3.24  | 3.38  | 0.06  | 9.79E-01 | no |
| Tmed9        | 45.80 | 46.90 | 0.03  | 9.79E-01 | no |
| Armc10       | 25.48 | 24.82 | -0.04 | 9.79E-01 | no |
| Awat2        | 0.76  | 0.71  | -0.10 | 9.79E-01 | no |
| Marcksl1-ps4 | 0.37  | 0.33  | -0.16 | 9.79E-01 | no |
| Mmp23        | 0.18  | 0.15  | -0.19 | 9.79E-01 | no |
| Psph         | 10.15 | 10.51 | 0.05  | 9.79E-01 | no |
| Creb3l4      | 0.12  | 0.11  | -0.22 | 9.79E-01 | no |
| Dgat1        | 8.31  | 8.63  | 0.05  | 9.79E-01 | no |
| Vdr          | 0.10  | 0.09  | -0.15 | 9.79E-01 | no |
| Ager         | 2.45  | 2.33  | -0.07 | 9.79E-01 | no |
| Praf2        | 8.42  | 8.76  | 0.06  | 9.79E-01 | no |
| Fbxl2        | 0.34  | 0.32  | -0.10 | 9.79E-01 | no |
| Eif2c3       | 4.55  | 4.69  | 0.04  | 9.79E-01 | no |
| Mtap1b       | 0.01  | 0.01  | 0.30  | 9.79E-01 | no |
| Josd2        | 15.88 | 16.47 | 0.05  | 9.79E-01 | no |
| Slc4a2       | 17.04 | 17.45 | 0.03  | 9.79E-01 | no |
| Taf10        | 46.67 | 45.41 | -0.04 | 9.79E-01 | no |
| Aimp1        | 29.62 | 28.79 | -0.04 | 9.79E-01 | no |
| Upf3a        | 16.29 | 15.80 | -0.04 | 9.79E-01 | no |
| Rpusd2       | 5.40  | 5.24  | -0.04 | 9.79E-01 | no |
| Ighmbp2      | 4.41  | 4.27  | -0.04 | 9.79E-01 | no |
| Sult2b1      | 0.58  | 0.63  | 0.11  | 9.80E-01 | no |
| Mbip         | 11.41 | 11.82 | 0.05  | 9.80E-01 | no |
| Coq9         | 12.64 | 13.05 | 0.05  | 9.80E-01 | no |
| Fam116b      | 4.90  | 5.06  | 0.05  | 9.80E-01 | no |
| Zfp386       | 23.70 | 24.31 | 0.04  | 9.80E-01 | no |
| Atl3         | 33.26 | 32.62 | -0.03 | 9.80E-01 | no |
| Pitrm1       | 22.61 | 22.10 | -0.03 | 9.80E-01 | no |
| Ogfod2       | 11.34 | 10.96 | -0.05 | 9.80E-01 | no |
| Znrd1        | 27.04 | 26.14 | -0.05 | 9.80E-01 | no |
| Rabepk       | 9.39  | 9.07  | -0.05 | 9.80E-01 | no |
| Arl2         | 14.72 | 14.19 | -0.05 | 9.80E-01 | no |
| Vmn2r97      | 0.05  | 0.04  | -0.43 | 9.80E-01 | no |
| Ccdc141      | 0.11  | 0.10  | -0.11 | 9.80E-01 | no |

|               |        |        |       |          |    |
|---------------|--------|--------|-------|----------|----|
| Lancl3        | 0.03   | 0.02   | -0.43 | 9.80E-01 | no |
| 4930550C14Ri  | 0.19   | 0.17   | -0.21 | 9.80E-01 | no |
| Nexn          | 0.08   | 0.07   | -0.22 | 9.80E-01 | no |
| Hoxa4         | 0.73   | 0.78   | 0.09  | 9.80E-01 | no |
| Gtpbp3        | 10.81  | 10.50  | -0.04 | 9.80E-01 | no |
| Fcer1a        | 0.10   | 0.08   | -0.42 | 9.80E-01 | no |
| Rnf31         | 16.89  | 17.30  | 0.03  | 9.80E-01 | no |
| Slc44a1       | 4.42   | 4.60   | 0.05  | 9.80E-01 | no |
| Slc25a11      | 29.60  | 30.35  | 0.04  | 9.80E-01 | no |
| Ctdnep1       | 34.48  | 35.31  | 0.03  | 9.80E-01 | no |
| Ak3           | 37.99  | 38.84  | 0.03  | 9.80E-01 | no |
| Wdr20a        | 12.56  | 12.20  | -0.04 | 9.80E-01 | no |
| Gabre         | 0.07   | 0.08   | 0.19  | 9.80E-01 | no |
| Cirbp         | 29.54  | 30.36  | 0.04  | 9.80E-01 | no |
| C1galt1c1     | 8.48   | 8.81   | 0.06  | 9.80E-01 | no |
| Mto1          | 10.25  | 10.57  | 0.04  | 9.80E-01 | no |
| Zfp407        | 8.50   | 8.70   | 0.03  | 9.80E-01 | no |
| Fkbp15        | 16.06  | 16.43  | 0.03  | 9.80E-01 | no |
| Sae1          | 74.63  | 73.07  | -0.03 | 9.80E-01 | no |
| Ttc19         | 8.25   | 8.01   | -0.04 | 9.80E-01 | no |
| Gm13611       | 20.72  | 19.92  | -0.06 | 9.80E-01 | no |
| Liph          | 0.13   | 0.11   | -0.24 | 9.80E-01 | no |
| Hnf4a         | 0.04   | 0.03   | -0.26 | 9.80E-01 | no |
| Csta          | 0.05   | 0.04   | -0.42 | 9.80E-01 | no |
| Ly86          | 9.88   | 10.28  | 0.06  | 9.80E-01 | no |
| Hk3           | 0.66   | 0.63   | -0.08 | 9.80E-01 | no |
| Pnpla8        | 15.35  | 15.72  | 0.03  | 9.80E-01 | no |
| Ropn1l        | 0.64   | 0.59   | -0.12 | 9.80E-01 | no |
| Sh3bgrl3      | 100.19 | 97.94  | -0.03 | 9.80E-01 | no |
| Gm12238       | 0.75   | 1.06   | 0.50  | 9.81E-01 | no |
| 1810037117Rik | 30.92  | 31.85  | 0.04  | 9.81E-01 | no |
| Styx          | 17.49  | 17.07  | -0.03 | 9.81E-01 | no |
| Nit1          | 14.20  | 14.71  | 0.05  | 9.81E-01 | no |
| Zkscan2       | 0.04   | 0.05   | 0.22  | 9.81E-01 | no |
| Slc4a11       | 0.06   | 0.07   | 0.20  | 9.81E-01 | no |
| Ift52         | 19.39  | 19.90  | 0.04  | 9.81E-01 | no |
| Brap          | 16.20  | 16.58  | 0.03  | 9.81E-01 | no |
| Gm15772       | 124.82 | 122.01 | -0.03 | 9.81E-01 | no |
| E130308A19Ri  | 9.94   | 9.69   | -0.04 | 9.81E-01 | no |
| Mpdu1         | 24.34  | 23.67  | -0.04 | 9.81E-01 | no |
| Cry2          | 6.02   | 5.84   | -0.04 | 9.81E-01 | no |
| Dmap1         | 15.43  | 14.98  | -0.04 | 9.81E-01 | no |

|               |        |        |       |          |    |
|---------------|--------|--------|-------|----------|----|
| Nckipsd       | 4.64   | 4.48   | -0.05 | 9.81E-01 | no |
| Tmem231       | 0.24   | 0.22   | -0.11 | 9.81E-01 | no |
| Gm10125       | 0.22   | 0.19   | -0.17 | 9.81E-01 | no |
| Chd3          | 30.67  | 31.30  | 0.03  | 9.81E-01 | no |
| Asxl1         | 30.50  | 31.12  | 0.03  | 9.81E-01 | no |
| Klrb1a        | 0.16   | 0.13   | -0.24 | 9.81E-01 | no |
| Ccl27b        | 1.36   | 1.48   | 0.12  | 9.81E-01 | no |
| Chdh          | 0.24   | 0.81   | 1.75  | 9.81E-01 | no |
| Ccdc89        | 0.15   | 0.16   | 0.15  | 9.81E-01 | no |
| Gm6524        | 3.34   | 3.49   | 0.06  | 9.81E-01 | no |
| C87436        | 9.56   | 9.83   | 0.04  | 9.81E-01 | no |
| Akna          | 32.36  | 31.69  | -0.03 | 9.81E-01 | no |
| 2310067B10Ri  | 17.34  | 16.98  | -0.03 | 9.81E-01 | no |
| Nptn          | 23.45  | 22.87  | -0.04 | 9.81E-01 | no |
| Rwdd4a        | 15.66  | 15.26  | -0.04 | 9.81E-01 | no |
| Cwf19l2       | 10.41  | 10.14  | -0.04 | 9.81E-01 | no |
| Zfp882        | 5.44   | 5.28   | -0.04 | 9.81E-01 | no |
| Ets2          | 9.22   | 8.97   | -0.04 | 9.82E-01 | no |
| Gm5531        | 0.05   | 0.03   | -0.40 | 9.82E-01 | no |
| Gdap1         | 0.02   | 0.02   | 0.40  | 9.82E-01 | no |
| Acot6         | 0.23   | 0.26   | 0.13  | 9.82E-01 | no |
| Hgf           | 0.31   | 0.33   | 0.11  | 9.82E-01 | no |
| Tbc1d13       | 19.64  | 20.08  | 0.03  | 9.82E-01 | no |
| Urod          | 22.84  | 22.21  | -0.04 | 9.82E-01 | no |
| Stx18         | 11.58  | 11.22  | -0.05 | 9.82E-01 | no |
| Ptpdc1        | 2.76   | 2.66   | -0.05 | 9.82E-01 | no |
| 2900005J15Ri  | 0.09   | 0.08   | -0.25 | 9.82E-01 | no |
| Serpina3m     | 0.05   | 0.04   | -0.40 | 9.82E-01 | no |
| Prdm2         | 16.32  | 15.99  | -0.03 | 9.82E-01 | no |
| Rpl34,Rpl34-p | 103.90 | 106.39 | 0.03  | 9.82E-01 | no |
| Aatf          | 16.22  | 15.78  | -0.04 | 9.82E-01 | no |
| Palm2         | 0.03   | 0.03   | 0.21  | 9.82E-01 | no |
| Fam71e1       | 1.05   | 1.12   | 0.09  | 9.82E-01 | no |
| Trex1         | 13.75  | 14.19  | 0.05  | 9.82E-01 | no |
| Slfn9         | 15.45  | 15.09  | -0.03 | 9.82E-01 | no |
| Rbm34         | 10.59  | 10.31  | -0.04 | 9.82E-01 | no |
| 2810001G20Ri  | 4.44   | 4.24   | -0.07 | 9.82E-01 | no |
| Rasl10a       | 2.34   | 2.23   | -0.07 | 9.82E-01 | no |
| Ankrd35       | 0.09   | 0.08   | -0.14 | 9.82E-01 | no |
| Phf3          | 22.45  | 22.90  | 0.03  | 9.82E-01 | no |
| Zfp438        | 2.72   | 2.83   | 0.06  | 9.82E-01 | no |
| Lym2          | 16.47  | 15.97  | -0.04 | 9.82E-01 | no |

|           |       |       |       |          |    |
|-----------|-------|-------|-------|----------|----|
| Mynn      | 10.83 | 11.10 | 0.04  | 9.83E-01 | no |
| BC039771  | 0.10  | 0.11  | 0.21  | 9.83E-01 | no |
| Iffo2     | 1.03  | 1.08  | 0.06  | 9.83E-01 | no |
| Slc36a4   | 3.36  | 3.50  | 0.06  | 9.83E-01 | no |
| Tcte3     | 0.81  | 0.88  | 0.12  | 9.83E-01 | no |
| Zfp295    | 5.36  | 5.49  | 0.04  | 9.83E-01 | no |
| Sectm1b   | 0.04  | 0.03  | -0.39 | 9.83E-01 | no |
| Fam169a   | 0.62  | 0.40  | -0.64 | 9.83E-01 | no |
| Bag5      | 13.10 | 12.75 | -0.04 | 9.83E-01 | no |
| Fkbp11    | 1.21  | 1.13  | -0.09 | 9.83E-01 | no |
| Pabpc4l   | 0.05  | 0.06  | 0.21  | 9.84E-01 | no |
| Fam57a    | 0.60  | 0.65  | 0.11  | 9.84E-01 | no |
| Ankrd61   | 1.37  | 1.44  | 0.07  | 9.84E-01 | no |
| Dusp23    | 5.40  | 5.61  | 0.06  | 9.84E-01 | no |
| Sacm1l    | 19.46 | 19.90 | 0.03  | 9.84E-01 | no |
| Ppp1r16b  | 32.52 | 33.14 | 0.03  | 9.84E-01 | no |
| Ddx42     | 32.90 | 32.26 | -0.03 | 9.84E-01 | no |
| Zfc3h1    | 21.99 | 21.56 | -0.03 | 9.84E-01 | no |
| Slc25a37  | 33.65 | 32.99 | -0.03 | 9.84E-01 | no |
| Mfn2      | 16.16 | 15.82 | -0.03 | 9.84E-01 | no |
| Pigo      | 14.08 | 13.77 | -0.03 | 9.84E-01 | no |
| Ercc4     | 5.32  | 5.19  | -0.04 | 9.84E-01 | no |
| Dhrs1     | 13.87 | 13.45 | -0.04 | 9.84E-01 | no |
| Ftsjd1    | 5.55  | 5.38  | -0.05 | 9.84E-01 | no |
| Fbxo40    | 0.11  | 0.10  | -0.16 | 9.84E-01 | no |
| Gnaz      | 0.06  | 0.05  | -0.25 | 9.84E-01 | no |
| Abcc2     | 0.03  | 0.03  | -0.25 | 9.84E-01 | no |
| Ccdc154   | 0.06  | 0.05  | -0.25 | 9.84E-01 | no |
| Ushbp1    | 0.04  | 0.03  | -0.25 | 9.84E-01 | no |
| Vps4b     | 31.59 | 32.23 | 0.03  | 9.84E-01 | no |
| Golm1     | 6.79  | 6.60  | -0.04 | 9.84E-01 | no |
| Cyp27a1   | 0.59  | 0.63  | 0.09  | 9.84E-01 | no |
| Gm7244    | 3.51  | 3.72  | 0.08  | 9.84E-01 | no |
| Thap6     | 4.83  | 4.98  | 0.05  | 9.84E-01 | no |
| Iqcb1     | 7.90  | 8.15  | 0.04  | 9.84E-01 | no |
| Hsd17b10  | 30.43 | 31.26 | 0.04  | 9.84E-01 | no |
| Zbtb48    | 9.33  | 9.06  | -0.04 | 9.84E-01 | no |
| Gm8801    | 6.41  | 6.20  | -0.05 | 9.84E-01 | no |
| Hist1h2bq | 0.35  | 0.33  | -0.11 | 9.84E-01 | no |
| Skap2     | 20.85 | 20.33 | -0.04 | 9.84E-01 | no |
| Csf3      | 0.06  | 0.08  | 0.32  | 9.84E-01 | no |
| Ccdc79    | 0.05  | 0.06  | 0.25  | 9.84E-01 | no |

|               |       |       |       |          |    |
|---------------|-------|-------|-------|----------|----|
| Stradb        | 11.34 | 11.66 | 0.04  | 9.84E-01 | no |
| Arl6ip5       | 34.29 | 33.49 | -0.03 | 9.84E-01 | no |
| Parn          | 13.98 | 13.65 | -0.04 | 9.84E-01 | no |
| Nhej1         | 5.34  | 5.13  | -0.06 | 9.84E-01 | no |
| Ptk7          | 0.79  | 0.75  | -0.07 | 9.84E-01 | no |
| Lin28a        | 0.04  | 0.03  | -0.26 | 9.84E-01 | no |
| Slc25a21      | 0.08  | 0.07  | -0.26 | 9.84E-01 | no |
| Blvra         | 9.29  | 9.61  | 0.05  | 9.84E-01 | no |
| BC023829      | 8.06  | 7.80  | -0.05 | 9.84E-01 | no |
| Prss39        | 0.28  | 0.25  | -0.14 | 9.84E-01 | no |
| Gm1123        | 0.07  | 0.06  | -0.38 | 9.84E-01 | no |
| Fkbp14        | 0.05  | 0.03  | -0.38 | 9.84E-01 | no |
| Arhgef18      | 22.76 | 22.33 | -0.03 | 9.84E-01 | no |
| Ttl           | 3.37  | 3.27  | -0.05 | 9.84E-01 | no |
| 9-Mar         | 0.13  | 0.11  | -0.16 | 9.84E-01 | no |
| Myct1         | 0.04  | 0.03  | -0.38 | 9.84E-01 | no |
| Gm16532       | 0.06  | 0.04  | -0.38 | 9.84E-01 | no |
| Btd           | 8.73  | 9.01  | 0.04  | 9.84E-01 | no |
| Dctn6         | 20.88 | 21.49 | 0.04  | 9.84E-01 | no |
| Ift20         | 21.60 | 20.95 | -0.04 | 9.84E-01 | no |
| Slc25a31      | 0.06  | 0.04  | -0.38 | 9.84E-01 | no |
| Zfp454        | 0.04  | 0.03  | -0.38 | 9.84E-01 | no |
| Fn3krp        | 5.96  | 6.16  | 0.05  | 9.84E-01 | no |
| Cenpb         | 39.01 | 39.76 | 0.03  | 9.84E-01 | no |
| Sbno1         | 27.06 | 27.57 | 0.03  | 9.84E-01 | no |
| Med17         | 14.49 | 14.17 | -0.03 | 9.84E-01 | no |
| Nes           | 0.04  | 0.03  | -0.16 | 9.84E-01 | no |
| Tnfrsf12a     | 1.39  | 0.75  | -0.88 | 9.84E-01 | no |
| Ly6c2         | 9.15  | 9.53  | 0.06  | 9.84E-01 | no |
| Gja10         | 0.06  | 0.07  | 0.31  | 9.84E-01 | no |
| 9130230L23Ril | 0.06  | 0.07  | 0.31  | 9.84E-01 | no |
| Spr           | 7.23  | 7.49  | 0.05  | 9.84E-01 | no |
| Zcchc11       | 33.92 | 34.56 | 0.03  | 9.84E-01 | no |
| Usp9x         | 29.33 | 28.78 | -0.03 | 9.84E-01 | no |
| Zfp777        | 13.79 | 13.48 | -0.03 | 9.84E-01 | no |
| Dcun1d4       | 3.04  | 2.94  | -0.05 | 9.84E-01 | no |
| Tox           | 3.18  | 3.06  | -0.06 | 9.84E-01 | no |
| Tsx           | 0.10  | 0.08  | -0.37 | 9.84E-01 | no |
| Zfp936        | 0.04  | 0.05  | 0.29  | 9.84E-01 | no |
| Baiap3        | 0.07  | 0.13  | 0.86  | 9.84E-01 | no |
| Cd300lf       | 0.36  | 0.59  | 0.73  | 9.84E-01 | no |
| Gpr1          | 0.04  | 0.05  | 0.35  | 9.84E-01 | no |

|               |       |       |       |          |    |
|---------------|-------|-------|-------|----------|----|
| Mab2112       | 0.03  | 0.04  | 0.30  | 9.84E-01 | no |
| Wdr65         | 0.03  | 0.03  | 0.25  | 9.84E-01 | no |
| Grb14         | 0.08  | 0.09  | 0.22  | 9.84E-01 | no |
| Fabp3         | 0.23  | 0.26  | 0.20  | 9.84E-01 | no |
| 9030425E11Ri  | 0.07  | 0.08  | 0.17  | 9.84E-01 | no |
| Aoah          | 0.09  | 0.10  | 0.16  | 9.84E-01 | no |
| Pi16          | 0.43  | 0.46  | 0.09  | 9.84E-01 | no |
| Itgb7         | 1.58  | 1.65  | 0.06  | 9.84E-01 | no |
| Nmnat3        | 2.97  | 3.08  | 0.05  | 9.84E-01 | no |
| Tmem67        | 2.66  | 2.76  | 0.05  | 9.84E-01 | no |
| Trim45        | 1.64  | 1.70  | 0.05  | 9.84E-01 | no |
| Oma1          | 7.53  | 7.77  | 0.05  | 9.84E-01 | no |
| Tspan6        | 12.83 | 13.22 | 0.04  | 9.84E-01 | no |
| Slc25a38      | 9.30  | 9.58  | 0.04  | 9.84E-01 | no |
| D230037D09R   | 14.95 | 15.40 | 0.04  | 9.84E-01 | no |
| Dnajc30       | 14.83 | 15.26 | 0.04  | 9.84E-01 | no |
| Pts           | 24.29 | 24.95 | 0.04  | 9.84E-01 | no |
| Mettl4        | 12.85 | 13.20 | 0.04  | 9.84E-01 | no |
| Lass4         | 9.54  | 9.78  | 0.04  | 9.84E-01 | no |
| Ldlrap1       | 12.24 | 12.54 | 0.03  | 9.84E-01 | no |
| Pmm2          | 17.94 | 18.36 | 0.03  | 9.84E-01 | no |
| Abcf3         | 12.95 | 13.25 | 0.03  | 9.84E-01 | no |
| Ino80c        | 22.19 | 22.69 | 0.03  | 9.84E-01 | no |
| Cyhr1         | 22.93 | 23.43 | 0.03  | 9.84E-01 | no |
| rp9           | 37.08 | 37.89 | 0.03  | 9.84E-01 | no |
| 1190005F20Ri  | 17.64 | 18.02 | 0.03  | 9.84E-01 | no |
| C80913        | 23.30 | 23.77 | 0.03  | 9.84E-01 | no |
| Rabep1        | 12.56 | 12.81 | 0.03  | 9.84E-01 | no |
| Asap1         | 17.02 | 17.35 | 0.03  | 9.84E-01 | no |
| Adam10        | 47.03 | 47.90 | 0.03  | 9.84E-01 | no |
| Zfp292        | 22.81 | 23.23 | 0.03  | 9.84E-01 | no |
| Gpi1          | 56.53 | 57.53 | 0.03  | 9.84E-01 | no |
| Mbnl1         | 65.31 | 64.16 | -0.03 | 9.84E-01 | no |
| Zbtb5         | 14.69 | 14.43 | -0.03 | 9.84E-01 | no |
| Slc30a5       | 52.16 | 51.21 | -0.03 | 9.84E-01 | no |
| Aldh2         | 49.48 | 48.57 | -0.03 | 9.84E-01 | no |
| Ppp1r12c      | 22.32 | 21.90 | -0.03 | 9.84E-01 | no |
| 1200011118Rik | 16.28 | 15.97 | -0.03 | 9.84E-01 | no |
| Ing1          | 24.35 | 23.88 | -0.03 | 9.84E-01 | no |
| Tmed8         | 9.20  | 9.02  | -0.03 | 9.84E-01 | no |
| Sh3gl1        | 25.56 | 25.05 | -0.03 | 9.84E-01 | no |
| Mtr           | 15.23 | 14.92 | -0.03 | 9.84E-01 | no |

|              |       |       |       |          |    |
|--------------|-------|-------|-------|----------|----|
| Smarcal1     | 9.41  | 9.22  | -0.03 | 9.84E-01 | no |
| Slc35e2      | 8.95  | 8.77  | -0.03 | 9.84E-01 | no |
| Mavs         | 15.72 | 15.40 | -0.03 | 9.84E-01 | no |
| Ergic1       | 20.52 | 20.08 | -0.03 | 9.84E-01 | no |
| Tmem170b     | 9.35  | 9.15  | -0.03 | 9.84E-01 | no |
| Zbtb9        | 17.96 | 17.57 | -0.03 | 9.84E-01 | no |
| Thoc5        | 16.58 | 16.20 | -0.03 | 9.84E-01 | no |
| Nmi          | 21.93 | 21.42 | -0.03 | 9.84E-01 | no |
| Tor2a        | 18.94 | 18.48 | -0.04 | 9.84E-01 | no |
| Zfp213       | 8.43  | 8.21  | -0.04 | 9.84E-01 | no |
| BC027231     | 9.93  | 9.67  | -0.04 | 9.84E-01 | no |
| Fut4         | 1.94  | 1.87  | -0.05 | 9.84E-01 | no |
| Spag1        | 2.15  | 2.07  | -0.05 | 9.84E-01 | no |
| Uprt         | 5.46  | 5.26  | -0.05 | 9.84E-01 | no |
| Acot1        | 2.31  | 2.21  | -0.06 | 9.84E-01 | no |
| Fbxo24       | 1.56  | 1.50  | -0.06 | 9.84E-01 | no |
| Gm347        | 0.44  | 0.42  | -0.07 | 9.84E-01 | no |
| Rin1         | 0.25  | 0.24  | -0.08 | 9.84E-01 | no |
| Hdhd3        | 0.86  | 0.81  | -0.09 | 9.84E-01 | no |
| Nrn1l        | 0.75  | 0.70  | -0.12 | 9.84E-01 | no |
| Nog          | 0.19  | 0.17  | -0.13 | 9.84E-01 | no |
| Car14        | 0.10  | 0.09  | -0.22 | 9.84E-01 | no |
| Adap2        | 0.09  | 0.07  | -0.23 | 9.84E-01 | no |
| Cyp2d26      | 0.07  | 0.06  | -0.29 | 9.84E-01 | no |
| Afp          | 0.04  | 0.04  | -0.30 | 9.84E-01 | no |
| Enkur        | 0.08  | 0.06  | -0.31 | 9.84E-01 | no |
| Gpr44        | 0.04  | 0.03  | -0.34 | 9.84E-01 | no |
| Gm572        | 0.06  | 0.05  | -0.35 | 9.84E-01 | no |
| 4933400C05Ri | 0.07  | 0.05  | -0.35 | 9.84E-01 | no |
| Chga         | 0.04  | 0.03  | -0.35 | 9.84E-01 | no |
| Lrrc3        | 0.02  | 0.02  | -0.35 | 9.84E-01 | no |
| Dsg2         | 0.02  | 0.01  | -0.35 | 9.84E-01 | no |
| Vnn3         | 0.05  | 0.04  | -0.36 | 9.84E-01 | no |
| Gdpd2        | 0.04  | 0.03  | -0.36 | 9.84E-01 | no |
| Tmem95       | 0.16  | 0.12  | -0.36 | 9.84E-01 | no |
| Mecom        | 0.02  | 0.02  | -0.36 | 9.84E-01 | no |
| Tnnc1        | 0.11  | 0.08  | -0.36 | 9.84E-01 | no |
| Gbgt1        | 0.07  | 0.05  | -0.36 | 9.84E-01 | no |
| Wasf1        | 0.04  | 0.03  | -0.36 | 9.84E-01 | no |
| 1600029D21Ri | 0.05  | 0.04  | -0.36 | 9.84E-01 | no |
| Piwil4       | 0.04  | 0.03  | -0.36 | 9.84E-01 | no |
| Pxt1         | 0.09  | 0.07  | -0.36 | 9.84E-01 | no |



|              |       |       |       |          |    |
|--------------|-------|-------|-------|----------|----|
| Itga8        | 0.02  | 0.01  | -0.37 | 9.84E-01 | no |
| Adcy10       | 0.02  | 0.01  | -0.37 | 9.84E-01 | no |
| Ucn2         | 0.13  | 0.15  | 0.21  | 9.85E-01 | no |
| Zscan12      | 2.06  | 2.13  | 0.05  | 9.85E-01 | no |
| C1qtnf6      | 1.06  | 1.11  | 0.07  | 9.85E-01 | no |
| Dhrs3        | 14.91 | 14.54 | -0.04 | 9.85E-01 | no |
| Lrig1        | 0.08  | 0.08  | 0.12  | 9.85E-01 | no |
| 1810030N24Ri | 12.98 | 13.40 | 0.05  | 9.85E-01 | no |
| Syde1        | 3.65  | 3.76  | 0.04  | 9.85E-01 | no |
| A930013F10Ri | 4.92  | 4.77  | -0.05 | 9.85E-01 | no |
| D10Bwg1379e  | 0.01  | 0.01  | -0.35 | 9.85E-01 | no |
| Sec61g       | 9.26  | 8.94  | -0.05 | 9.85E-01 | no |
| Bptf         | 26.65 | 27.11 | 0.03  | 9.85E-01 | no |
| Kif5a        | 0.12  | 0.11  | -0.12 | 9.85E-01 | no |
| Fam83c       | 0.03  | 0.03  | -0.35 | 9.85E-01 | no |
| Gcc2         | 12.53 | 12.76 | 0.03  | 9.85E-01 | no |
| Ncoa3        | 21.08 | 21.45 | 0.03  | 9.85E-01 | no |
| Asxl2        | 20.25 | 19.90 | -0.03 | 9.85E-01 | no |
| Mreg         | 6.74  | 6.55  | -0.04 | 9.85E-01 | no |
| Pou1f1       | 0.10  | 0.08  | -0.35 | 9.85E-01 | no |
| Zfp418       | 1.67  | 1.61  | -0.06 | 9.85E-01 | no |
| Lgals3       | 2.16  | 2.25  | 0.06  | 9.85E-01 | no |
| Kri1         | 17.06 | 17.40 | 0.03  | 9.85E-01 | no |
| Lilra6       | 0.20  | 0.26  | 0.38  | 9.85E-01 | no |
| 5033411D12Ri | 0.14  | 0.15  | 0.15  | 9.85E-01 | no |
| Sult1a1      | 0.84  | 0.89  | 0.08  | 9.85E-01 | no |
| Fance        | 9.51  | 9.75  | 0.04  | 9.85E-01 | no |
| Mrpl24       | 39.94 | 40.82 | 0.03  | 9.85E-01 | no |
| Uhmk1        | 23.00 | 23.48 | 0.03  | 9.85E-01 | no |
| Stambpl1     | 52.04 | 52.98 | 0.03  | 9.85E-01 | no |
| Cx3cl1       | 0.03  | 0.02  | -0.34 | 9.85E-01 | no |
| Lrp2bp       | 0.12  | 0.11  | -0.13 | 9.85E-01 | no |
| Fndc5        | 0.03  | 0.03  | -0.29 | 9.85E-01 | no |
| Avil         | 0.11  | 0.12  | 0.12  | 9.86E-01 | no |
| 1700106N22Ri | 1.76  | 1.84  | 0.06  | 9.86E-01 | no |
| Idh2         | 37.92 | 38.64 | 0.03  | 9.86E-01 | no |
| Commd8       | 13.49 | 13.20 | -0.03 | 9.86E-01 | no |
| Rundc3b      | 2.75  | 2.84  | 0.05  | 9.86E-01 | no |
| Zfp775       | 3.25  | 3.35  | 0.04  | 9.86E-01 | no |
| Rabl3        | 8.07  | 8.30  | 0.04  | 9.86E-01 | no |
| Ndufa13      | 19.60 | 20.09 | 0.03  | 9.86E-01 | no |
| Heg1         | 13.40 | 13.66 | 0.03  | 9.86E-01 | no |

|              |       |       |       |          |    |
|--------------|-------|-------|-------|----------|----|
| Fbxo38       | 19.24 | 19.59 | 0.03  | 9.86E-01 | no |
| Sdcbp        | 69.94 | 70.96 | 0.02  | 9.86E-01 | no |
| 2310003C23Ri | 24.26 | 23.76 | -0.03 | 9.86E-01 | no |
| Pdcd7        | 15.88 | 15.54 | -0.03 | 9.86E-01 | no |
| Nck1         | 22.20 | 21.70 | -0.03 | 9.86E-01 | no |
| Actr8        | 14.48 | 14.16 | -0.03 | 9.86E-01 | no |
| Tmem179b     | 34.84 | 34.01 | -0.03 | 9.86E-01 | no |
| Tmem106c     | 15.09 | 14.72 | -0.04 | 9.86E-01 | no |
| Gm7609       | 2.80  | 2.69  | -0.06 | 9.86E-01 | no |
| AY074887     | 3.70  | 3.55  | -0.06 | 9.86E-01 | no |
| Acta2        | 0.11  | 0.10  | -0.17 | 9.86E-01 | no |
| Tm4sf20      | 0.05  | 0.06  | 0.33  | 9.86E-01 | no |
| Slit2        | 0.01  | 0.01  | -0.34 | 9.86E-01 | no |
| Hp           | 2.25  | 2.16  | -0.06 | 9.86E-01 | no |
| Gja4         | 0.09  | 0.10  | 0.20  | 9.86E-01 | no |
| Egfr         | 0.09  | 0.10  | 0.14  | 9.86E-01 | no |
| BC049715     | 1.69  | 1.76  | 0.06  | 9.86E-01 | no |
| Rnf121       | 10.66 | 10.96 | 0.04  | 9.86E-01 | no |
| Rnf103       | 6.58  | 6.75  | 0.04  | 9.86E-01 | no |
| 4933403F05Ri | 7.95  | 8.10  | 0.03  | 9.86E-01 | no |
| Eif3e        | 81.38 | 82.78 | 0.02  | 9.86E-01 | no |
| Dock11       | 28.77 | 28.30 | -0.02 | 9.86E-01 | no |
| Usp38        | 24.42 | 24.00 | -0.02 | 9.86E-01 | no |
| Rnf115       | 27.02 | 26.51 | -0.03 | 9.86E-01 | no |
| Zfp81        | 9.75  | 9.49  | -0.04 | 9.86E-01 | no |
| Gpr141       | 0.48  | 0.46  | -0.07 | 9.86E-01 | no |
| Hsd17b1      | 0.21  | 0.19  | -0.14 | 9.86E-01 | no |
| Ak8          | 0.15  | 0.16  | 0.15  | 9.86E-01 | no |
| Glod4        | 15.75 | 16.09 | 0.03  | 9.86E-01 | no |
| Aldh16a1     | 22.22 | 22.64 | 0.03  | 9.86E-01 | no |
| Cwc27        | 11.52 | 11.23 | -0.04 | 9.86E-01 | no |
| Snd1         | 31.49 | 30.96 | -0.02 | 9.86E-01 | no |
| Zdhhc22      | 0.12  | 0.09  | -0.33 | 9.86E-01 | no |
| Lhfp15       | 0.07  | 0.06  | -0.33 | 9.86E-01 | no |
| Pikfyve      | 5.63  | 5.74  | 0.03  | 9.86E-01 | no |
| Ubr4         | 25.30 | 25.73 | 0.02  | 9.86E-01 | no |
| H2afy2       | 0.38  | 0.36  | -0.08 | 9.86E-01 | no |
| Tmem9b       | 13.54 | 13.88 | 0.04  | 9.86E-01 | no |
| Btbd9        | 8.27  | 8.12  | -0.03 | 9.86E-01 | no |
| Sirt6        | 14.81 | 15.13 | 0.03  | 9.86E-01 | no |
| Arhgap25     | 22.48 | 22.11 | -0.02 | 9.86E-01 | no |
| Tspan9       | 0.17  | 0.16  | -0.09 | 9.86E-01 | no |

|              |       |       |       |          |    |
|--------------|-------|-------|-------|----------|----|
| Lace1        | 2.30  | 2.38  | 0.05  | 9.86E-01 | no |
| Muted        | 8.72  | 8.49  | -0.04 | 9.86E-01 | no |
| Kcng3        | 0.03  | 0.03  | 0.27  | 9.86E-01 | no |
| Kctd21       | 0.92  | 0.96  | 0.06  | 9.86E-01 | no |
| Znhit1       | 12.37 | 12.71 | 0.04  | 9.87E-01 | no |
| Adnp         | 44.16 | 43.45 | -0.02 | 9.87E-01 | no |
| 2310005G13Ri | 0.09  | 0.08  | -0.18 | 9.87E-01 | no |
| Klk7         | 0.05  | 0.04  | -0.33 | 9.87E-01 | no |
| P2ry14       | 0.42  | 0.74  | 0.82  | 9.87E-01 | no |
| Gk2          | 0.23  | 0.25  | 0.11  | 9.87E-01 | no |
| 4933403G14Ri | 1.48  | 1.53  | 0.05  | 9.87E-01 | no |
| 9930104L06Ri | 8.48  | 8.28  | -0.03 | 9.87E-01 | no |
| Sez6l        | 0.01  | 0.01  | -0.32 | 9.87E-01 | no |
| 2010001M06R  | 0.77  | 0.83  | 0.11  | 9.87E-01 | no |
| Prdm16       | 0.50  | 0.51  | 0.05  | 9.87E-01 | no |
| Cd180        | 20.07 | 20.47 | 0.03  | 9.87E-01 | no |
| Hook3        | 9.68  | 9.52  | -0.02 | 9.87E-01 | no |
| Zfp335       | 17.32 | 17.03 | -0.02 | 9.87E-01 | no |
| Chmp2a       | 31.24 | 30.56 | -0.03 | 9.87E-01 | no |
| Glrx5        | 30.35 | 29.68 | -0.03 | 9.87E-01 | no |
| Slc26a2      | 8.23  | 8.04  | -0.03 | 9.87E-01 | no |
| Vps29        | 28.08 | 27.43 | -0.03 | 9.87E-01 | no |
| Rps19bp1     | 16.36 | 15.93 | -0.04 | 9.87E-01 | no |
| Orm1         | 0.14  | 0.12  | -0.23 | 9.87E-01 | no |
| Commd5       | 11.37 | 11.04 | -0.04 | 9.87E-01 | no |
| Gm8898       | 0.02  | 0.03  | 0.26  | 9.87E-01 | no |
| Ankrd13a     | 64.18 | 63.18 | -0.02 | 9.87E-01 | no |
| Pgs1         | 15.33 | 15.02 | -0.03 | 9.87E-01 | no |
| Zkscan16     | 5.03  | 4.89  | -0.04 | 9.87E-01 | no |
| Gm1082       | 0.05  | 0.04  | -0.20 | 9.87E-01 | no |
| Tnfrsf25     | 0.05  | 0.04  | -0.32 | 9.87E-01 | no |
| Spink8       | 0.14  | 0.11  | -0.32 | 9.87E-01 | no |
| Efcab2       | 3.06  | 3.16  | 0.05  | 9.87E-01 | no |
| Gpr22        | 0.01  | 0.02  | 0.38  | 9.87E-01 | no |
| Acot3        | 0.03  | 0.04  | 0.29  | 9.87E-01 | no |
| 2610034B18Ri | 0.04  | 0.05  | 0.26  | 9.87E-01 | no |
| Phkg1        | 0.05  | 0.06  | 0.20  | 9.87E-01 | no |
| Bmx          | 0.06  | 0.07  | 0.18  | 9.87E-01 | no |
| Nkpd1        | 0.06  | 0.06  | 0.18  | 9.87E-01 | no |
| Oas1d        | 0.12  | 0.13  | 0.14  | 9.87E-01 | no |
| 1700065D16Ri | 0.17  | 0.18  | 0.10  | 9.87E-01 | no |
| Amacr        | 2.54  | 2.62  | 0.05  | 9.87E-01 | no |

|              |       |       |       |          |    |
|--------------|-------|-------|-------|----------|----|
| Mett5d1      | 4.27  | 4.40  | 0.04  | 9.87E-01 | no |
| Zfp874a      | 5.13  | 5.27  | 0.04  | 9.87E-01 | no |
| Pctp         | 8.61  | 8.83  | 0.04  | 9.87E-01 | no |
| Zfp71-rs1    | 5.54  | 5.67  | 0.04  | 9.87E-01 | no |
| Poglut1      | 11.00 | 11.24 | 0.03  | 9.87E-01 | no |
| Prkx         | 11.29 | 11.53 | 0.03  | 9.87E-01 | no |
| Hsf1         | 20.60 | 20.98 | 0.03  | 9.87E-01 | no |
| Prdx3        | 38.21 | 38.91 | 0.03  | 9.87E-01 | no |
| Al848100     | 11.06 | 11.26 | 0.03  | 9.87E-01 | no |
| Tmem57       | 16.18 | 16.47 | 0.03  | 9.87E-01 | no |
| Copg2        | 20.91 | 21.27 | 0.02  | 9.87E-01 | no |
| Rabgap1l     | 28.81 | 28.41 | -0.02 | 9.87E-01 | no |
| Zfp36l1      | 54.78 | 53.93 | -0.02 | 9.87E-01 | no |
| Ly9          | 25.13 | 24.70 | -0.02 | 9.87E-01 | no |
| Mapkap1      | 20.03 | 19.69 | -0.03 | 9.87E-01 | no |
| Strn         | 15.53 | 15.26 | -0.03 | 9.87E-01 | no |
| Lrrc45       | 17.41 | 17.09 | -0.03 | 9.87E-01 | no |
| Psmb9        | 55.98 | 54.92 | -0.03 | 9.87E-01 | no |
| Aasdhppt     | 11.36 | 11.11 | -0.03 | 9.87E-01 | no |
| Elt1d1       | 3.54  | 3.44  | -0.04 | 9.87E-01 | no |
| Mfsd3        | 4.33  | 4.21  | -0.04 | 9.87E-01 | no |
| Zfp619       | 1.79  | 1.74  | -0.04 | 9.87E-01 | no |
| Lamb3        | 1.24  | 1.20  | -0.05 | 9.87E-01 | no |
| Rassf8       | 1.15  | 1.10  | -0.06 | 9.87E-01 | no |
| Cdnf         | 0.44  | 0.42  | -0.07 | 9.87E-01 | no |
| Sema6c       | 0.40  | 0.38  | -0.07 | 9.87E-01 | no |
| Acer2        | 0.20  | 0.19  | -0.08 | 9.87E-01 | no |
| Hoxb3        | 0.37  | 0.35  | -0.09 | 9.87E-01 | no |
| 1700019D03Ri | 0.49  | 0.46  | -0.11 | 9.87E-01 | no |
| Unc5b        | 0.03  | 0.02  | -0.17 | 9.87E-01 | no |
| Muc4         | 0.01  | 0.01  | -0.26 | 9.87E-01 | no |
| Isl1         | 0.04  | 0.03  | -0.31 | 9.87E-01 | no |
| Tnp2         | 0.13  | 0.10  | -0.31 | 9.87E-01 | no |
| Ar           | 0.03  | 0.02  | -0.31 | 9.87E-01 | no |
| Pax6         | 0.03  | 0.02  | -0.32 | 9.87E-01 | no |
| B3gat2       | 0.94  | 1.12  | 0.24  | 9.87E-01 | no |
| Isoc1        | 34.23 | 34.80 | 0.02  | 9.87E-01 | no |
| Adora2b      | 0.16  | 0.15  | -0.13 | 9.87E-01 | no |
| Heatr7b1     | 0.44  | 2.61  | 2.56  | 9.87E-01 | no |
| Kdm5a        | 18.80 | 19.09 | 0.02  | 9.87E-01 | no |
| Cdk18        | 0.18  | 0.19  | 0.08  | 9.87E-01 | no |
| Exd2         | 10.94 | 10.72 | -0.03 | 9.88E-01 | no |

|              |       |       |       |          |    |
|--------------|-------|-------|-------|----------|----|
| Axin1        | 24.35 | 24.68 | 0.02  | 9.88E-01 | no |
| D5Erttd605e  | 1.02  | 0.97  | -0.07 | 9.88E-01 | no |
| Ubxn1        | 43.35 | 42.59 | -0.03 | 9.88E-01 | no |
| Has3         | 0.36  | 0.35  | -0.06 | 9.88E-01 | no |
| Apom         | 0.45  | 0.49  | 0.11  | 9.88E-01 | no |
| Atp5l        | 10.20 | 10.53 | 0.05  | 9.88E-01 | no |
| S100a11      | 19.55 | 20.11 | 0.04  | 9.88E-01 | no |
| Ndufs4       | 17.08 | 17.46 | 0.03  | 9.88E-01 | no |
| 9930021J03Ri | 11.97 | 12.16 | 0.02  | 9.88E-01 | no |
| Rnf220       | 21.05 | 20.70 | -0.02 | 9.88E-01 | no |
| Zfp830       | 9.58  | 9.38  | -0.03 | 9.88E-01 | no |
| Thap7        | 11.40 | 11.12 | -0.04 | 9.88E-01 | no |
| Polr2i       | 14.36 | 13.96 | -0.04 | 9.88E-01 | no |
| Ckm          | 0.10  | 0.09  | -0.19 | 9.88E-01 | no |
| Cd8b1        | 0.06  | 0.05  | -0.30 | 9.88E-01 | no |
| Jph1         | 0.10  | 0.11  | 0.13  | 9.88E-01 | no |
| Clip1        | 12.31 | 12.11 | -0.02 | 9.88E-01 | no |
| Ing4         | 32.32 | 32.88 | 0.03  | 9.89E-01 | no |
| Trmt11       | 4.93  | 5.07  | 0.04  | 9.89E-01 | no |
| Max          | 35.37 | 35.90 | 0.02  | 9.89E-01 | no |
| Wdr26        | 41.72 | 42.33 | 0.02  | 9.89E-01 | no |
| Hsbp1        | 33.22 | 32.60 | -0.03 | 9.89E-01 | no |
| Dnajc14      | 20.50 | 20.83 | 0.02  | 9.89E-01 | no |
| 9530068E07Ri | 33.35 | 32.82 | -0.02 | 9.89E-01 | no |
| Tmeff1       | 0.04  | 0.03  | -0.29 | 9.89E-01 | no |
| Slc16a2      | 0.06  | 0.05  | -0.15 | 9.89E-01 | no |
| 4930415F15Ri | 0.33  | 0.30  | -0.15 | 9.89E-01 | no |
| Hlcs         | 2.09  | 2.15  | 0.04  | 9.89E-01 | no |
| Stk3         | 8.10  | 8.27  | 0.03  | 9.89E-01 | no |
| Fbxl8        | 10.38 | 10.15 | -0.03 | 9.89E-01 | no |
| Pxmp4        | 11.19 | 10.93 | -0.03 | 9.89E-01 | no |
| 2210021J22Ri | 11.40 | 11.13 | -0.04 | 9.89E-01 | no |
| Angpt4       | 0.11  | 0.10  | -0.16 | 9.89E-01 | no |
| A230051G13R  | 4.48  | 4.58  | 0.03  | 9.90E-01 | no |
| Zc3hav1      | 36.53 | 36.09 | -0.02 | 9.90E-01 | no |
| Leprel2      | 0.04  | 0.04  | 0.20  | 9.90E-01 | no |
| Adam1b       | 0.61  | 0.63  | 0.06  | 9.90E-01 | no |
| Tbca         | 27.08 | 27.75 | 0.04  | 9.90E-01 | no |
| Dhx30        | 25.08 | 24.71 | -0.02 | 9.90E-01 | no |
| Mlycd        | 4.95  | 4.82  | -0.04 | 9.90E-01 | no |
| Wnt6         | 0.09  | 0.10  | 0.15  | 9.90E-01 | no |
| 2310035K24Ri | 6.93  | 6.74  | -0.04 | 9.90E-01 | no |

|               |       |       |       |          |    |
|---------------|-------|-------|-------|----------|----|
| Utp11l        | 19.94 | 19.50 | -0.03 | 9.90E-01 | no |
| Ccdc85c       | 1.90  | 1.84  | -0.05 | 9.90E-01 | no |
| Mgam          | 0.06  | 0.06  | -0.10 | 9.90E-01 | no |
| Dennd4c       | 10.53 | 10.68 | 0.02  | 9.90E-01 | no |
| BC029722      | 16.04 | 15.71 | -0.03 | 9.90E-01 | no |
| Zdhhc4        | 21.14 | 20.71 | -0.03 | 9.90E-01 | no |
| Cmtm3         | 4.47  | 4.60  | 0.04  | 9.90E-01 | no |
| Bbs12         | 5.51  | 5.65  | 0.04  | 9.90E-01 | no |
| Slc35a2       | 11.97 | 11.74 | -0.03 | 9.90E-01 | no |
| Smad4         | 24.63 | 24.26 | -0.02 | 9.90E-01 | no |
| Sh2d4a        | 0.06  | 0.05  | -0.18 | 9.90E-01 | no |
| 1110021J02Rik | 16.60 | 16.35 | -0.02 | 9.91E-01 | no |
| Bcat2         | 15.53 | 15.85 | 0.03  | 9.91E-01 | no |
| 1810058I24Rik | 25.35 | 25.85 | 0.03  | 9.91E-01 | no |
| C230091D08Ri  | 9.89  | 10.08 | 0.03  | 9.91E-01 | no |
| Mgat2         | 29.03 | 29.48 | 0.02  | 9.91E-01 | no |
| Zbtb17        | 12.83 | 12.61 | -0.02 | 9.91E-01 | no |
| Cry1          | 12.12 | 11.90 | -0.03 | 9.91E-01 | no |
| 4933406I18Rik | 0.50  | 0.47  | -0.10 | 9.91E-01 | no |
| Gjd3          | 0.11  | 0.09  | -0.24 | 9.91E-01 | no |
| Dnm3          | 0.01  | 0.01  | 0.27  | 9.91E-01 | no |
| Ntn5          | 0.05  | 0.04  | -0.28 | 9.91E-01 | no |
| Cd93          | 79.04 | 77.90 | -0.02 | 9.91E-01 | no |
| Notch1        | 17.03 | 17.28 | 0.02  | 9.91E-01 | no |
| Ppil6         | 0.20  | 0.18  | -0.14 | 9.91E-01 | no |
| Elovl2        | 0.07  | 0.06  | -0.14 | 9.91E-01 | no |
| Card14        | 0.02  | 0.07  | 2.11  | 9.91E-01 | no |
| Mctp1         | 2.61  | 2.68  | 0.04  | 9.91E-01 | no |
| Arf3          | 45.08 | 45.71 | 0.02  | 9.91E-01 | no |
| Klri2         | 0.11  | 0.12  | 0.10  | 9.91E-01 | no |
| Ubtd1         | 3.42  | 3.52  | 0.04  | 9.91E-01 | no |
| Slc35f2       | 3.99  | 4.10  | 0.04  | 9.91E-01 | no |
| Unc13a        | 0.12  | 0.12  | -0.06 | 9.91E-01 | no |
| 2700062C07Ri  | 10.25 | 10.51 | 0.04  | 9.91E-01 | no |
| Tmem161b      | 9.04  | 9.22  | 0.03  | 9.91E-01 | no |
| Tob2          | 23.72 | 24.06 | 0.02  | 9.91E-01 | no |
| Tab1          | 12.46 | 12.25 | -0.03 | 9.91E-01 | no |
| Mblac1        | 3.29  | 3.19  | -0.05 | 9.91E-01 | no |
| Adamtsl5      | 0.03  | 0.03  | -0.27 | 9.91E-01 | no |
| Glce          | 5.91  | 6.03  | 0.03  | 9.91E-01 | no |
| Gm11127       | 0.05  | 0.05  | -0.21 | 9.91E-01 | no |
| Ms4a8a        | 0.19  | 0.21  | 0.14  | 9.91E-01 | no |

|               |       |       |       |          |    |
|---------------|-------|-------|-------|----------|----|
| Gpr4          | 0.11  | 0.12  | 0.10  | 9.91E-01 | no |
| Zfp707        | 5.44  | 5.58  | 0.04  | 9.91E-01 | no |
| Aldoa         | 66.72 | 67.58 | 0.02  | 9.91E-01 | no |
| Dnmt3a        | 18.67 | 18.90 | 0.02  | 9.91E-01 | no |
| Clasp1        | 25.61 | 25.89 | 0.02  | 9.91E-01 | no |
| Stk11ip       | 20.36 | 20.08 | -0.02 | 9.91E-01 | no |
| 6230400D17Ri  | 1.43  | 1.38  | -0.06 | 9.91E-01 | no |
| Nfe2l3        | 0.35  | 0.33  | -0.07 | 9.91E-01 | no |
| Oas2          | 3.66  | 3.75  | 0.03  | 9.91E-01 | no |
| Sumf1         | 7.41  | 7.57  | 0.03  | 9.92E-01 | no |
| Trappc4       | 20.78 | 20.38 | -0.03 | 9.92E-01 | no |
| Ckmt1         | 0.05  | 0.04  | -0.23 | 9.92E-01 | no |
| Ltbp3         | 0.06  | 0.06  | 0.10  | 9.92E-01 | no |
| Gm962         | 6.16  | 6.04  | -0.03 | 9.92E-01 | no |
| Ssr4          | 42.00 | 42.75 | 0.03  | 9.92E-01 | no |
| Fam23a        | 0.04  | 0.05  | 0.18  | 9.92E-01 | no |
| Ccnh          | 23.66 | 24.07 | 0.02  | 9.92E-01 | no |
| Smarcd2       | 90.67 | 89.74 | -0.01 | 9.92E-01 | no |
| Phospho1      | 0.09  | 0.08  | -0.15 | 9.92E-01 | no |
| Ptpn7         | 35.21 | 34.73 | -0.02 | 9.92E-01 | no |
| Narf          | 15.33 | 15.11 | -0.02 | 9.92E-01 | no |
| Plscr1        | 2.74  | 2.81  | 0.04  | 9.92E-01 | no |
| Cdk4          | 87.63 | 86.46 | -0.02 | 9.92E-01 | no |
| Hist1h3g      | 0.74  | 0.70  | -0.09 | 9.92E-01 | no |
| Mudeng        | 9.49  | 9.31  | -0.03 | 9.92E-01 | no |
| Pfn4          | 0.38  | 0.35  | -0.09 | 9.92E-01 | no |
| Zbtb22        | 19.40 | 19.70 | 0.02  | 9.92E-01 | no |
| Gsdmc4        | 0.03  | 0.04  | 0.26  | 9.92E-01 | no |
| Commd10       | 9.71  | 9.93  | 0.03  | 9.92E-01 | no |
| Zmym2         | 18.31 | 18.05 | -0.02 | 9.92E-01 | no |
| Syce1         | 0.14  | 0.13  | -0.13 | 9.92E-01 | no |
| Iglon5        | 0.03  | 0.03  | -0.22 | 9.92E-01 | no |
| Spdya         | 0.87  | 0.61  | -0.52 | 9.92E-01 | no |
| Klk9          | 0.08  | 0.07  | -0.18 | 9.92E-01 | no |
| Ptgdr         | 0.02  | 0.03  | 0.26  | 9.93E-01 | no |
| Peli2         | 0.19  | 0.20  | 0.06  | 9.93E-01 | no |
| 1110008J03RiI | 3.61  | 3.71  | 0.04  | 9.93E-01 | no |
| Polr3a        | 10.43 | 10.59 | 0.02  | 9.93E-01 | no |
| Crebbp        | 19.80 | 19.54 | -0.02 | 9.93E-01 | no |
| Eif4ebp2      | 69.17 | 68.26 | -0.02 | 9.93E-01 | no |
| 4922505G16Ri  | 0.21  | 0.20  | -0.07 | 9.93E-01 | no |
| Esm1          | 0.04  | 0.04  | -0.24 | 9.93E-01 | no |

|               |       |       |       |          |    |
|---------------|-------|-------|-------|----------|----|
| Med26         | 9.17  | 9.34  | 0.03  | 9.93E-01 | no |
| Fubp3         | 9.69  | 9.85  | 0.02  | 9.93E-01 | no |
| Gm9897        | 5.09  | 5.23  | 0.04  | 9.93E-01 | no |
| Spf2          | 3.00  | 3.08  | 0.04  | 9.93E-01 | no |
| Tbc1d8b       | 4.16  | 4.24  | 0.03  | 9.93E-01 | no |
| Scpep1        | 10.71 | 10.92 | 0.03  | 9.93E-01 | no |
| Ric8b         | 10.04 | 10.21 | 0.02  | 9.93E-01 | no |
| Guf1          | 10.94 | 11.12 | 0.02  | 9.93E-01 | no |
| Ppm1a         | 22.31 | 22.64 | 0.02  | 9.93E-01 | no |
| Mll5          | 34.52 | 34.08 | -0.02 | 9.93E-01 | no |
| Kiss1r        | 0.27  | 0.25  | -0.06 | 9.93E-01 | no |
| Gm996         | 0.10  | 0.10  | -0.08 | 9.93E-01 | no |
| Ear10         | 0.12  | 0.10  | -0.36 | 9.93E-01 | no |
| Gpr126        | 0.01  | 0.01  | 0.25  | 9.94E-01 | no |
| Tbc1d30       | 0.22  | 0.22  | 0.05  | 9.94E-01 | no |
| Rpp21         | 16.85 | 17.25 | 0.03  | 9.94E-01 | no |
| 1810027O10Ri  | 34.05 | 34.79 | 0.03  | 9.94E-01 | no |
| Vamp2         | 27.42 | 27.82 | 0.02  | 9.94E-01 | no |
| Clptm1l       | 31.80 | 32.26 | 0.02  | 9.94E-01 | no |
| Pcf11         | 22.84 | 22.55 | -0.02 | 9.94E-01 | no |
| lars2         | 22.73 | 22.43 | -0.02 | 9.94E-01 | no |
| Pop7          | 16.17 | 15.83 | -0.03 | 9.94E-01 | no |
| 1500031L02Ril | 7.33  | 7.17  | -0.03 | 9.94E-01 | no |
| Dnase1l2      | 2.49  | 2.41  | -0.04 | 9.94E-01 | no |
| Gm106         | 0.66  | 0.63  | -0.05 | 9.94E-01 | no |
| Hap1          | 0.09  | 0.08  | -0.10 | 9.94E-01 | no |
| 1700034I23Rik | 0.05  | 0.04  | -0.21 | 9.94E-01 | no |
| Col1a2        | 0.02  | 0.01  | -0.21 | 9.94E-01 | no |
| Itga7         | 0.02  | 0.02  | -0.25 | 9.94E-01 | no |
| Lrrc63        | 0.03  | 0.03  | 0.24  | 9.94E-01 | no |
| Oprl1         | 0.02  | 0.03  | 0.24  | 9.94E-01 | no |
| Msh4          | 0.03  | 0.03  | 0.20  | 9.94E-01 | no |
| Alg5          | 9.49  | 9.70  | 0.03  | 9.94E-01 | no |
| 2610002I17Rik | 6.88  | 7.02  | 0.03  | 9.94E-01 | no |
| Ltbp4         | 2.79  | 2.85  | 0.03  | 9.94E-01 | no |
| Hsf2          | 7.43  | 7.58  | 0.03  | 9.94E-01 | no |
| Asb3          | 7.32  | 7.46  | 0.03  | 9.94E-01 | no |
| Dedd2         | 15.36 | 15.62 | 0.02  | 9.94E-01 | no |
| Hmg20a        | 22.24 | 22.54 | 0.02  | 9.94E-01 | no |
| 5730601F06Ri  | 19.20 | 19.40 | 0.02  | 9.94E-01 | no |
| Gna13         | 34.13 | 33.72 | -0.02 | 9.94E-01 | no |
| Dok3          | 84.86 | 83.82 | -0.02 | 9.94E-01 | no |



|              |        |        |       |          |    |
|--------------|--------|--------|-------|----------|----|
| 9130011J15Ri | 16.47  | 16.22  | -0.02 | 9.94E-01 | no |
| Sptlc1       | 15.10  | 14.86  | -0.02 | 9.94E-01 | no |
| Bcl7b        | 18.63  | 18.33  | -0.02 | 9.94E-01 | no |
| Hic2         | 2.46   | 2.41   | -0.03 | 9.94E-01 | no |
| Itgb1bp1     | 12.77  | 12.50  | -0.03 | 9.94E-01 | no |
| Pard3b       | 0.75   | 0.73   | -0.04 | 9.94E-01 | no |
| Trpv3        | 0.04   | 0.03   | -0.21 | 9.94E-01 | no |
| 1700016C15Ri | 0.12   | 0.10   | -0.21 | 9.94E-01 | no |
| Cbln2        | 0.03   | 0.04   | 0.23  | 9.94E-01 | no |
| 9430076C15Ri | 0.03   | 0.04   | 0.19  | 9.94E-01 | no |
| Fbxw13       | 0.07   | 0.08   | 0.19  | 9.94E-01 | no |
| Gsta4        | 0.18   | 0.19   | 0.13  | 9.94E-01 | no |
| Cstad        | 0.33   | 0.36   | 0.10  | 9.94E-01 | no |
| Fam167b      | 0.65   | 0.68   | 0.07  | 9.94E-01 | no |
| Slc7a3       | 0.30   | 0.31   | 0.06  | 9.94E-01 | no |
| Dhrs13       | 1.78   | 1.83   | 0.04  | 9.94E-01 | no |
| Selm         | 6.17   | 6.32   | 0.04  | 9.94E-01 | no |
| Mettl7a1     | 5.83   | 5.96   | 0.03  | 9.94E-01 | no |
| Fam86        | 5.25   | 5.36   | 0.03  | 9.94E-01 | no |
| 2610015P09Ri | 3.11   | 3.18   | 0.03  | 9.94E-01 | no |
| Creg1        | 8.70   | 8.86   | 0.03  | 9.94E-01 | no |
| Spryd3       | 8.40   | 8.56   | 0.03  | 9.94E-01 | no |
| Chd7         | 2.23   | 2.27   | 0.03  | 9.94E-01 | no |
| Mtcp1        | 14.49  | 14.74  | 0.02  | 9.94E-01 | no |
| Dhrs4        | 16.10  | 16.38  | 0.02  | 9.94E-01 | no |
| Elovl1       | 20.73  | 21.08  | 0.02  | 9.94E-01 | no |
| Zbtb43       | 8.89   | 9.01   | 0.02  | 9.94E-01 | no |
| Serinc3      | 238.58 | 241.76 | 0.02  | 9.94E-01 | no |
| Sos1         | 9.23   | 9.35   | 0.02  | 9.94E-01 | no |
| Tmed7        | 33.41  | 33.83  | 0.02  | 9.94E-01 | no |
| Mysm1        | 14.08  | 14.26  | 0.02  | 9.94E-01 | no |
| Mlec         | 82.44  | 83.43  | 0.02  | 9.94E-01 | no |
| Ppip5k2      | 21.89  | 21.62  | -0.02 | 9.94E-01 | no |
| Amfr         | 22.44  | 22.16  | -0.02 | 9.94E-01 | no |
| Arpc3        | 75.20  | 74.24  | -0.02 | 9.94E-01 | no |
| Erlin2       | 13.88  | 13.70  | -0.02 | 9.94E-01 | no |
| Fam195b      | 31.62  | 31.15  | -0.02 | 9.94E-01 | no |
| Wdr73        | 14.65  | 14.43  | -0.02 | 9.94E-01 | no |
| Pef1         | 23.62  | 23.27  | -0.02 | 9.94E-01 | no |
| Fam53a       | 13.41  | 13.19  | -0.02 | 9.94E-01 | no |
| 1110038F14Ri | 21.29  | 20.93  | -0.02 | 9.94E-01 | no |
| Dbt          | 7.74   | 7.60   | -0.03 | 9.94E-01 | no |

|               |       |       |       |          |    |
|---------------|-------|-------|-------|----------|----|
| Tmem71        | 9.59  | 9.42  | -0.03 | 9.94E-01 | no |
| Lrrc42        | 9.74  | 9.56  | -0.03 | 9.94E-01 | no |
| Mettl11a      | 9.80  | 9.60  | -0.03 | 9.94E-01 | no |
| Cyb5d1        | 15.88 | 15.54 | -0.03 | 9.94E-01 | no |
| Gm9079        | 2.72  | 2.65  | -0.04 | 9.94E-01 | no |
| Naip2         | 0.61  | 0.59  | -0.04 | 9.94E-01 | no |
| 2810410L24Ril | 0.85  | 0.83  | -0.05 | 9.94E-01 | no |
| Lypd3         | 0.71  | 0.69  | -0.05 | 9.94E-01 | no |
| Gm6642        | 2.13  | 2.05  | -0.05 | 9.94E-01 | no |
| Tgfb3         | 0.22  | 0.22  | -0.06 | 9.94E-01 | no |
| Rnf43         | 0.11  | 0.10  | -0.07 | 9.94E-01 | no |
| Adcy5         | 0.07  | 0.06  | -0.09 | 9.94E-01 | no |
| Ppef2         | 0.04  | 0.03  | -0.20 | 9.94E-01 | no |
| Kcp           | 0.02  | 0.01  | -0.23 | 9.94E-01 | no |
| Colec11       | 0.06  | 0.05  | -0.23 | 9.94E-01 | no |
| Ptgis         | 0.05  | 0.04  | -0.24 | 9.94E-01 | no |
| Vil1          | 0.01  | 0.01  | -0.33 | 9.94E-01 | no |
| Kcna6         | 0.01  | 0.01  | -0.34 | 9.94E-01 | no |
| Prmt8         | 0.02  | 0.02  | -0.34 | 9.94E-01 | no |
| Amigo2        | 0.52  | 0.62  | 0.25  | 9.94E-01 | no |
| Arhgef33      | 0.93  | 0.96  | 0.04  | 9.94E-01 | no |
| B930041F14Ri  | 0.58  | 0.60  | 0.05  | 9.94E-01 | no |
| Rps23         | 3.75  | 3.87  | 0.04  | 9.94E-01 | no |
| Adss          | 42.29 | 42.80 | 0.02  | 9.94E-01 | no |
| Mettl3        | 16.88 | 16.62 | -0.02 | 9.94E-01 | no |
| Fgf3          | 0.06  | 0.05  | -0.22 | 9.94E-01 | no |
| Gm11968       | 3.91  | 4.02  | 0.04  | 9.95E-01 | no |
| Mbtd1         | 23.11 | 22.84 | -0.02 | 9.95E-01 | no |
| Cpxm1         | 0.21  | 0.20  | -0.07 | 9.95E-01 | no |
| B130006D01Ri  | 0.15  | 0.15  | -0.08 | 9.95E-01 | no |
| Napg          | 12.72 | 12.90 | 0.02  | 9.95E-01 | no |
| BC022687      | 1.69  | 1.64  | -0.04 | 9.95E-01 | no |
| Fzd3          | 0.08  | 0.08  | 0.06  | 9.95E-01 | no |
| Slc19a1       | 17.82 | 18.06 | 0.02  | 9.95E-01 | no |
| Fgfr1op       | 29.19 | 28.86 | -0.02 | 9.95E-01 | no |
| 6330512M04R   | 0.02  | 0.02  | 0.22  | 9.95E-01 | no |
| Fam188a       | 8.95  | 9.11  | 0.03  | 9.95E-01 | no |
| Syf2          | 32.49 | 32.93 | 0.02  | 9.95E-01 | no |
| Zmym5         | 11.99 | 12.14 | 0.02  | 9.95E-01 | no |
| Ciao1         | 14.55 | 14.35 | -0.02 | 9.95E-01 | no |
| Cacnb4        | 0.85  | 0.87  | 0.03  | 9.95E-01 | no |
| Dtd1          | 10.47 | 10.27 | -0.03 | 9.95E-01 | no |

|              |       |       |       |          |    |
|--------------|-------|-------|-------|----------|----|
| Gm10653      | 0.12  | 0.32  | 1.43  | 9.95E-01 | no |
| Rps7         | 31.76 | 31.28 | -0.02 | 9.95E-01 | no |
| Med31        | 6.10  | 5.96  | -0.03 | 9.95E-01 | no |
| Aldh8a1      | 0.13  | 0.13  | -0.09 | 9.95E-01 | no |
| Ano8         | 7.02  | 6.91  | -0.02 | 9.95E-01 | no |
| Gm561        | 7.78  | 7.58  | -0.04 | 9.95E-01 | no |
| Gpr179       | 0.06  | 0.05  | -0.06 | 9.95E-01 | no |
| Tmem17       | 0.89  | 0.86  | -0.05 | 9.95E-01 | no |
| Smad2        | 21.71 | 21.43 | -0.02 | 9.95E-01 | no |
| 4921530D09Ri | 0.04  | 0.03  | -0.21 | 9.95E-01 | no |
| Kazald1      | 0.31  | 0.32  | 0.07  | 9.96E-01 | no |
| Mllt11       | 5.56  | 5.67  | 0.03  | 9.96E-01 | no |
| Tomm20       | 52.26 | 52.93 | 0.02  | 9.96E-01 | no |
| Kitl         | 0.06  | 0.07  | 0.09  | 9.96E-01 | no |
| Scfd2        | 5.05  | 5.12  | 0.02  | 9.96E-01 | no |
| Cbx6         | 24.66 | 24.93 | 0.02  | 9.96E-01 | no |
| Mtpap        | 18.16 | 17.92 | -0.02 | 9.96E-01 | no |
| Nrg4         | 1.96  | 1.91  | -0.04 | 9.96E-01 | no |
| Prr18        | 0.20  | 0.19  | -0.06 | 9.96E-01 | no |
| Btnl3        | 0.04  | 0.03  | -0.23 | 9.96E-01 | no |
| Acmsd        | 0.09  | 0.10  | 0.11  | 9.96E-01 | no |
| Aak1         | 7.91  | 7.99  | 0.01  | 9.96E-01 | no |
| A330023F24Ri | 0.38  | 0.36  | -0.04 | 9.96E-01 | no |
| Neurl2       | 1.79  | 2.39  | 0.41  | 9.96E-01 | no |
| Tll9         | 0.49  | 0.52  | 0.07  | 9.96E-01 | no |
| Rpp40        | 2.81  | 2.87  | 0.03  | 9.96E-01 | no |
| Rock2        | 26.18 | 26.46 | 0.02  | 9.96E-01 | no |
| Sp100        | 24.94 | 24.63 | -0.02 | 9.96E-01 | no |
| Ino80b       | 20.28 | 19.96 | -0.02 | 9.96E-01 | no |
| Slc37a4      | 7.63  | 7.50  | -0.03 | 9.96E-01 | no |
| Armcx5       | 5.51  | 5.41  | -0.03 | 9.96E-01 | no |
| Pbx4         | 5.46  | 5.34  | -0.03 | 9.96E-01 | no |
| Spata7       | 3.08  | 3.01  | -0.03 | 9.96E-01 | no |
| Comp         | 0.30  | 0.29  | -0.05 | 9.96E-01 | no |
| Rab36        | 0.20  | 0.19  | -0.06 | 9.96E-01 | no |
| Slc17a8      | 0.02  | 0.02  | 0.20  | 9.96E-01 | no |
| Icam4        | 0.19  | 0.20  | 0.11  | 9.96E-01 | no |
| Nr1h3        | 0.25  | 0.27  | 0.08  | 9.96E-01 | no |
| Zcchc4       | 5.91  | 6.02  | 0.03  | 9.96E-01 | no |
| 9030025P20Ri | 7.58  | 7.71  | 0.03  | 9.96E-01 | no |
| Polr3gl      | 11.85 | 12.05 | 0.02  | 9.96E-01 | no |
| Thtpa        | 6.29  | 6.40  | 0.02  | 9.96E-01 | no |

|              |       |       |       |          |    |
|--------------|-------|-------|-------|----------|----|
| Rad1         | 18.57 | 18.85 | 0.02  | 9.96E-01 | no |
| Med28        | 9.21  | 9.34  | 0.02  | 9.96E-01 | no |
| Birc6        | 30.32 | 30.00 | -0.02 | 9.96E-01 | no |
| Ift140       | 9.10  | 8.99  | -0.02 | 9.96E-01 | no |
| Gm12669      | 30.88 | 30.44 | -0.02 | 9.96E-01 | no |
| Surf1        | 15.80 | 15.55 | -0.02 | 9.96E-01 | no |
| Antxr2       | 3.67  | 3.61  | -0.03 | 9.96E-01 | no |
| Myo1d        | 0.19  | 0.19  | -0.05 | 9.96E-01 | no |
| B4galnt4     | 0.05  | 0.04  | -0.13 | 9.96E-01 | no |
| Gm14047      | 0.03  | 0.03  | -0.29 | 9.96E-01 | no |
| Rpl7a        | 1.54  | 1.59  | 0.04  | 9.96E-01 | no |
| 1300010F03Ri | 9.38  | 9.27  | -0.02 | 9.96E-01 | no |
| Fxyd7        | 0.21  | 0.23  | 0.12  | 9.96E-01 | no |
| Cul4a        | 18.25 | 18.46 | 0.02  | 9.96E-01 | no |
| 6820431F20Ri | 86.73 | 87.36 | 0.01  | 9.96E-01 | no |
| 1700020O03Ri | 12.39 | 12.24 | -0.02 | 9.96E-01 | no |
| Ap2s1        | 50.45 | 49.82 | -0.02 | 9.96E-01 | no |
| Mrpl54       | 30.21 | 29.73 | -0.02 | 9.96E-01 | no |
| Maneal       | 0.04  | 0.04  | -0.15 | 9.96E-01 | no |
| Gpr151       | 0.13  | 0.14  | 0.10  | 9.96E-01 | no |
| Hr           | 0.28  | 0.27  | -0.04 | 9.96E-01 | no |
| 2310022B05Ri | 4.26  | 4.19  | -0.03 | 9.96E-01 | no |
| Rnpep        | 22.96 | 22.71 | -0.02 | 9.96E-01 | no |
| Gng10        | 30.66 | 30.24 | -0.02 | 9.96E-01 | no |
| Abcb10       | 4.54  | 4.47  | -0.02 | 9.96E-01 | no |
| Crabp2       | 0.08  | 0.07  | -0.20 | 9.96E-01 | no |
| Veph1        | 0.07  | 0.07  | 0.12  | 9.96E-01 | no |
| Pdcd1        | 4.50  | 4.59  | 0.03  | 9.96E-01 | no |
| Mpv17l2      | 13.42 | 13.65 | 0.02  | 9.96E-01 | no |
| Urb2         | 17.74 | 17.92 | 0.01  | 9.96E-01 | no |
| Traf3        | 10.68 | 10.79 | 0.01  | 9.96E-01 | no |
| Csnk1g2      | 70.92 | 70.34 | -0.01 | 9.96E-01 | no |
| Asb8         | 15.75 | 15.55 | -0.02 | 9.96E-01 | no |
| Stard4       | 13.29 | 13.12 | -0.02 | 9.96E-01 | no |
| Ankdd1b      | 1.15  | 1.13  | -0.03 | 9.96E-01 | no |
| Lamc2        | 0.01  | 0.01  | -0.21 | 9.96E-01 | no |
| Raet1e       | 1.70  | 1.35  | -0.34 | 9.96E-01 | no |
| Mdp1         | 21.60 | 21.34 | -0.02 | 9.96E-01 | no |
| Gpsm3        | 26.67 | 26.35 | -0.02 | 9.97E-01 | no |
| Pdrg1        | 30.78 | 31.16 | 0.02  | 9.97E-01 | no |
| Pdxdc1       | 18.91 | 18.72 | -0.01 | 9.97E-01 | no |
| Il2rb        | 0.34  | 0.35  | 0.05  | 9.97E-01 | no |

|               |       |       |       |          |    |
|---------------|-------|-------|-------|----------|----|
| Ttc21a        | 0.02  | 0.01  | -0.21 | 9.97E-01 | no |
| Serpinb9b     | 0.04  | 0.04  | 0.19  | 9.97E-01 | no |
| Rnd2          | 0.21  | 0.23  | 0.11  | 9.97E-01 | no |
| Abca17        | 0.26  | 0.27  | 0.04  | 9.97E-01 | no |
| Nek3          | 3.15  | 3.21  | 0.03  | 9.97E-01 | no |
| Tug1          | 58.67 | 59.14 | 0.01  | 9.97E-01 | no |
| Gm608         | 15.25 | 15.10 | -0.01 | 9.97E-01 | no |
| Mon1b         | 14.41 | 14.27 | -0.01 | 9.97E-01 | no |
| Asb6          | 13.75 | 13.57 | -0.02 | 9.97E-01 | no |
| Mrps34        | 19.87 | 19.57 | -0.02 | 9.97E-01 | no |
| Dcun1d3       | 3.08  | 3.03  | -0.02 | 9.97E-01 | no |
| 1700030J22Ril | 0.34  | 0.35  | 0.04  | 9.97E-01 | no |
| Sox12         | 8.15  | 8.25  | 0.02  | 9.97E-01 | no |
| Lyz1          | 5.36  | 5.25  | -0.03 | 9.97E-01 | no |
| Clip4         | 0.05  | 0.05  | -0.14 | 9.97E-01 | no |
| BC020535      | 3.03  | 3.09  | 0.03  | 9.97E-01 | no |
| AI506816      | 0.05  | 0.06  | 0.13  | 9.97E-01 | no |
| 2310068J16Ril | 0.52  | 0.54  | 0.05  | 9.97E-01 | no |
| 5730508B09Ri  | 5.82  | 5.93  | 0.03  | 9.97E-01 | no |
| 9430008C03Ri  | 5.12  | 5.04  | -0.02 | 9.97E-01 | no |
| Ggct          | 2.66  | 2.61  | -0.03 | 9.97E-01 | no |
| Plekhg6       | 0.02  | 0.02  | -0.19 | 9.97E-01 | no |
| Kctd13        | 9.01  | 8.87  | -0.02 | 9.97E-01 | no |
| Ihh           | 0.07  | 0.07  | 0.10  | 9.97E-01 | no |
| Icos          | 0.07  | 0.08  | 0.10  | 9.97E-01 | no |
| A530064D06R   | 0.19  | 0.20  | 0.07  | 9.97E-01 | no |
| Syng2         | 33.67 | 34.05 | 0.02  | 9.97E-01 | no |
| Dcaf13        | 24.84 | 24.53 | -0.02 | 9.97E-01 | no |
| Fam58b        | 13.65 | 13.44 | -0.02 | 9.97E-01 | no |
| C330021F23Ri  | 0.94  | 0.91  | -0.04 | 9.97E-01 | no |
| 1700113I22Rik | 0.34  | 0.21  | -0.71 | 9.97E-01 | no |
| Nsun3         | 6.13  | 6.24  | 0.03  | 9.98E-01 | no |
| Btg2          | 47.33 | 46.89 | -0.01 | 9.98E-01 | no |
| Ap3b1         | 23.47 | 23.24 | -0.01 | 9.98E-01 | no |
| Snhg6         | 19.88 | 19.51 | -0.03 | 9.98E-01 | no |
| 1700016D06Ri  | 0.06  | 0.06  | -0.20 | 9.98E-01 | no |
| 1700012B09Ri  | 0.10  | 0.11  | 0.17  | 9.98E-01 | no |
| Ccdc92        | 0.31  | 0.32  | 0.05  | 9.98E-01 | no |
| Gtpbp6        | 13.84 | 14.02 | 0.02  | 9.98E-01 | no |
| Katna1        | 18.68 | 18.91 | 0.02  | 9.98E-01 | no |
| Rnf6          | 19.27 | 19.47 | 0.01  | 9.98E-01 | no |
| Ahrr          | 0.06  | 0.05  | -0.08 | 9.98E-01 | no |

|          |        |        |       |          |    |
|----------|--------|--------|-------|----------|----|
| Slc2a12  | 0.02   | 0.02   | -0.17 | 9.98E-01 | no |
| Gprin1   | 0.02   | 0.01   | -0.18 | 9.98E-01 | no |
| Jam2     | 0.06   | 0.05   | -0.20 | 9.98E-01 | no |
| Otos     | 0.96   | 1.00   | 0.05  | 9.98E-01 | no |
| Tnfrsf8  | 0.87   | 0.84   | -0.04 | 9.98E-01 | no |
| Mon2     | 14.31  | 14.20  | -0.01 | 9.98E-01 | no |
| Usp24    | 23.51  | 23.72  | 0.01  | 9.98E-01 | no |
| Scaf1    | 31.84  | 31.56  | -0.01 | 9.98E-01 | no |
| Fam160a1 | 0.04   | 0.04   | 0.10  | 9.98E-01 | no |
| Cgnl1    | 0.18   | 0.18   | 0.04  | 9.98E-01 | no |
| Pter     | 0.82   | 0.83   | 0.03  | 9.98E-01 | no |
| Spp1     | 4.29   | 4.37   | 0.03  | 9.98E-01 | no |
| Mtf1     | 5.71   | 5.77   | 0.02  | 9.98E-01 | no |
| Tmem134  | 23.41  | 23.67  | 0.02  | 9.98E-01 | no |
| Cog3     | 14.95  | 15.10  | 0.01  | 9.98E-01 | no |
| Cog1     | 12.71  | 12.57  | -0.02 | 9.98E-01 | no |
| Zfp672   | 10.43  | 10.31  | -0.02 | 9.98E-01 | no |
| Ndufa8   | 36.31  | 35.86  | -0.02 | 9.98E-01 | no |
| Scube3   | 0.05   | 0.05   | -0.10 | 9.98E-01 | no |
| Mark1    | 0.12   | 0.12   | 0.05  | 9.98E-01 | no |
| Arglu1   | 55.37  | 54.87  | -0.01 | 9.98E-01 | no |
| Fbxw5    | 22.49  | 22.72  | 0.01  | 9.99E-01 | no |
| Fam151a  | 0.03   | 0.03   | 0.15  | 9.99E-01 | no |
| Zbtb46   | 0.08   | 0.08   | 0.10  | 9.99E-01 | no |
| Rspo1    | 0.08   | 0.08   | 0.10  | 9.99E-01 | no |
| Gja1     | 0.22   | 0.22   | 0.05  | 9.99E-01 | no |
| BC064078 | 5.58   | 5.68   | 0.03  | 9.99E-01 | no |
| Zmiz1    | 45.15  | 45.54  | 0.01  | 9.99E-01 | no |
| Ash1l    | 20.19  | 20.36  | 0.01  | 9.99E-01 | no |
| Arpc1b   | 87.89  | 87.13  | -0.01 | 9.99E-01 | no |
| Slc9a1   | 16.72  | 16.57  | -0.01 | 9.99E-01 | no |
| Zfp398   | 9.27   | 9.16   | -0.02 | 9.99E-01 | no |
| Txndc12  | 18.30  | 18.06  | -0.02 | 9.99E-01 | no |
| Sec14l2  | 0.15   | 0.14   | -0.06 | 9.99E-01 | no |
| Slco1b2  | 0.07   | 0.07   | -0.09 | 9.99E-01 | no |
| Gm15104  | 0.22   | 0.20   | -0.15 | 9.99E-01 | no |
| Sema6a   | 0.01   | 0.01   | 0.17  | 9.99E-01 | no |
| Phf7     | 7.49   | 7.60   | 0.02  | 9.99E-01 | no |
| Dpm2     | 25.43  | 25.76  | 0.02  | 9.99E-01 | no |
| Tbc1d15  | 18.93  | 19.11  | 0.01  | 9.99E-01 | no |
| Cd19     | 112.96 | 112.00 | -0.01 | 9.99E-01 | no |
| Fam113b  | 10.13  | 10.00  | -0.02 | 9.99E-01 | no |

|               |       |       |       |          |    |
|---------------|-------|-------|-------|----------|----|
| Ankrd50       | 3.68  | 3.63  | -0.02 | 9.99E-01 | no |
| Gpr180        | 4.79  | 4.72  | -0.02 | 9.99E-01 | no |
| Unc5a         | 1.05  | 1.03  | -0.03 | 9.99E-01 | no |
| 4933417G07Ri  | 1.89  | 1.85  | -0.03 | 9.99E-01 | no |
| Wdr27         | 0.02  | 0.03  | 0.16  | 9.99E-01 | no |
| 9530003J23RiI | 0.06  | 0.06  | 0.14  | 9.99E-01 | no |
| Rxfp4         | 0.06  | 0.06  | 0.14  | 9.99E-01 | no |
| Slc44a3       | 0.04  | 0.04  | 0.13  | 9.99E-01 | no |
| 1700020C07Ri  | 0.09  | 0.10  | 0.12  | 9.99E-01 | no |
| Adam32        | 0.03  | 0.03  | 0.12  | 9.99E-01 | no |
| Brsk2         | 0.02  | 0.02  | 0.12  | 9.99E-01 | no |
| Cacng2        | 0.02  | 0.03  | 0.12  | 9.99E-01 | no |
| Clec14a       | 0.01  | 0.02  | 0.12  | 9.99E-01 | no |
| Gm266         | 0.06  | 0.06  | 0.12  | 9.99E-01 | no |
| Hist1h2bn     | 0.20  | 0.22  | 0.12  | 9.99E-01 | no |
| Inhba         | 0.05  | 0.05  | 0.12  | 9.99E-01 | no |
| Kcnj5         | 0.02  | 0.02  | 0.12  | 9.99E-01 | no |
| Kcnk7         | 0.06  | 0.07  | 0.12  | 9.99E-01 | no |
| Mrc2          | 0.01  | 0.01  | 0.12  | 9.99E-01 | no |
| Plce1         | 0.01  | 0.01  | 0.12  | 9.99E-01 | no |
| Sdsl          | 0.06  | 0.06  | 0.12  | 9.99E-01 | no |
| Slc30a10      | 0.01  | 0.01  | 0.12  | 9.99E-01 | no |
| Ubd           | 0.08  | 0.08  | 0.12  | 9.99E-01 | no |
| Hsbp1l1       | 0.14  | 0.14  | 0.09  | 9.99E-01 | no |
| Col1a1        | 0.04  | 0.04  | 0.08  | 9.99E-01 | no |
| Stbd1         | 0.12  | 0.13  | 0.06  | 9.99E-01 | no |
| Gatsl3        | 0.36  | 0.37  | 0.04  | 9.99E-01 | no |
| Arhgef37      | 0.22  | 0.22  | 0.04  | 9.99E-01 | no |
| R74862        | 1.12  | 1.14  | 0.03  | 9.99E-01 | no |
| Rph3al        | 1.73  | 1.76  | 0.03  | 9.99E-01 | no |
| Xdh           | 0.61  | 0.62  | 0.03  | 9.99E-01 | no |
| Acvr1         | 1.58  | 1.61  | 0.03  | 9.99E-01 | no |
| Gm5113        | 1.78  | 1.81  | 0.03  | 9.99E-01 | no |
| Hddc3         | 4.53  | 4.61  | 0.02  | 9.99E-01 | no |
| 2700097O09Ri  | 5.79  | 5.88  | 0.02  | 9.99E-01 | no |
| Thyn1         | 9.62  | 9.76  | 0.02  | 9.99E-01 | no |
| Mfsd8         | 4.85  | 4.92  | 0.02  | 9.99E-01 | no |
| Snpc1         | 7.21  | 7.30  | 0.02  | 9.99E-01 | no |
| Pepd          | 10.20 | 10.33 | 0.02  | 9.99E-01 | no |
| Pih1d1        | 24.31 | 24.59 | 0.02  | 9.99E-01 | no |
| Chrac1        | 21.01 | 21.26 | 0.02  | 9.99E-01 | no |
| Echs1         | 18.05 | 18.24 | 0.02  | 9.99E-01 | no |

|              |       |       |       |          |    |
|--------------|-------|-------|-------|----------|----|
| Ormdl3       | 18.79 | 18.99 | 0.01  | 9.99E-01 | no |
| Msra         | 19.14 | 19.32 | 0.01  | 9.99E-01 | no |
| Atg12        | 17.76 | 17.94 | 0.01  | 9.99E-01 | no |
| Nf1          | 5.97  | 6.02  | 0.01  | 9.99E-01 | no |
| Zmym1        | 18.32 | 18.49 | 0.01  | 9.99E-01 | no |
| Letmd1       | 18.33 | 18.49 | 0.01  | 9.99E-01 | no |
| Usp25        | 25.73 | 25.93 | 0.01  | 9.99E-01 | no |
| Gak          | 27.47 | 27.68 | 0.01  | 9.99E-01 | no |
| Gltscr2      | 54.70 | 54.29 | -0.01 | 9.99E-01 | no |
| Numa1        | 42.69 | 42.36 | -0.01 | 9.99E-01 | no |
| Copb1        | 35.59 | 35.31 | -0.01 | 9.99E-01 | no |
| Zfp91        | 39.55 | 39.24 | -0.01 | 9.99E-01 | no |
| Cnm3         | 11.59 | 11.50 | -0.01 | 9.99E-01 | no |
| Srsf12       | 24.86 | 24.64 | -0.01 | 9.99E-01 | no |
| Egln1        | 22.48 | 22.29 | -0.01 | 9.99E-01 | no |
| Spcs2        | 28.86 | 28.61 | -0.01 | 9.99E-01 | no |
| Kcmf1        | 19.55 | 19.38 | -0.01 | 9.99E-01 | no |
| Pdlim1       | 24.55 | 24.32 | -0.01 | 9.99E-01 | no |
| Ttc13        | 13.78 | 13.65 | -0.01 | 9.99E-01 | no |
| Fastk        | 23.77 | 23.54 | -0.01 | 9.99E-01 | no |
| Taf1c        | 9.97  | 9.87  | -0.01 | 9.99E-01 | no |
| D10Jhu81e    | 19.21 | 19.01 | -0.01 | 9.99E-01 | no |
| Vti1a        | 10.10 | 9.99  | -0.01 | 9.99E-01 | no |
| Grcc10       | 56.47 | 55.88 | -0.02 | 9.99E-01 | no |
| Pdcd6        | 23.48 | 23.23 | -0.02 | 9.99E-01 | no |
| Rhob         | 9.52  | 9.41  | -0.02 | 9.99E-01 | no |
| Ccdc69       | 16.44 | 16.25 | -0.02 | 9.99E-01 | no |
| Ptdss2       | 8.59  | 8.49  | -0.02 | 9.99E-01 | no |
| Zfp930       | 6.99  | 6.90  | -0.02 | 9.99E-01 | no |
| Atox1        | 34.13 | 33.72 | -0.02 | 9.99E-01 | no |
| Fam120c      | 3.55  | 3.50  | -0.02 | 9.99E-01 | no |
| Pcbp3        | 7.88  | 7.78  | -0.02 | 9.99E-01 | no |
| Dnajb4       | 6.19  | 6.11  | -0.02 | 9.99E-01 | no |
| Rnf170       | 4.83  | 4.77  | -0.02 | 9.99E-01 | no |
| Mecr         | 12.36 | 12.20 | -0.02 | 9.99E-01 | no |
| Rhbdl1       | 6.16  | 6.08  | -0.02 | 9.99E-01 | no |
| Cpt1b        | 3.70  | 3.65  | -0.02 | 9.99E-01 | no |
| Sumf2        | 5.85  | 5.77  | -0.02 | 9.99E-01 | no |
| 1810014B01Ri | 7.97  | 7.85  | -0.02 | 9.99E-01 | no |
| Mterf        | 6.04  | 5.94  | -0.02 | 9.99E-01 | no |
| Btbd19       | 2.83  | 2.78  | -0.02 | 9.99E-01 | no |
| Dnajc25      | 3.16  | 3.11  | -0.02 | 9.99E-01 | no |



|               |       |       |            |          |    |
|---------------|-------|-------|------------|----------|----|
| Chad          | 2.07  | 2.03  | -0.03      | 9.99E-01 | no |
| Klhl8         | 1.13  | 1.11  | -0.03      | 9.99E-01 | no |
| D19Ert652e    | 0.19  | 0.19  | -0.03      | 9.99E-01 | no |
| Sag           | 0.70  | 0.69  | -0.04      | 9.99E-01 | no |
| Abca5         | 0.14  | 0.13  | -0.04      | 9.99E-01 | no |
| Tnnt3         | 0.42  | 0.41  | -0.05      | 9.99E-01 | no |
| 4930579J09Rik | 0.26  | 0.25  | -0.05      | 9.99E-01 | no |
| Hist1h3h      | 0.89  | 0.86  | -0.05      | 9.99E-01 | no |
| Ppfia3        | 0.07  | 0.07  | -0.06      | 9.99E-01 | no |
| Olfm2         | 0.07  | 0.06  | -0.11      | 9.99E-01 | no |
| Wnt16         | 0.05  | 0.04  | -0.13      | 9.99E-01 | no |
| Rarres2       | 0.08  | 0.07  | -0.14      | 9.99E-01 | no |
| Nmnat2        | 0.02  | 0.02  | -0.15      | 9.99E-01 | no |
| St6galnac5    | 0.04  | 0.03  | -0.16      | 9.99E-01 | no |
| Irg1          | 0.03  | 0.03  | -0.16      | 9.99E-01 | no |
| Avpr1b        | 0.02  | 0.02  | -0.17      | 9.99E-01 | no |
| 9530053A07Rik | 0.01  | 0.00  | -0.24      | 9.99E-01 | no |
| Sirpb1b       | 0.12  | 0.13  | 0.08       | 9.99E-01 | no |
| Cab39         | 41.36 | 41.66 | 0.01       | 9.99E-01 | no |
| Hk2           | 4.83  | 4.88  | 0.01       | 9.99E-01 | no |
| 6530401D17Rik | 0.30  | 0.31  | 0.05       | 9.99E-01 | no |
| Zfp566        | 3.63  | 3.69  | 0.02       | 9.99E-01 | no |
| Supt6h        | 23.43 | 23.60 | 0.01       | 9.99E-01 | no |
| Spnb2         | 45.88 | 45.62 | -0.01      | 9.99E-01 | no |
| Slmo1         | 0.04  | 0.03  | -0.15      | 9.99E-01 | no |
| Adnp2         | 13.15 | 13.25 | 0.01       | 9.99E-01 | no |
| Zfp526        | 9.85  | 9.76  | -0.01      | 9.99E-01 | no |
| Mul1          | 7.42  | 7.35  | -0.01      | 9.99E-01 | no |
| Vcan          | 0.21  | 0.21  | -0.03      | 9.99E-01 | no |
| Clec2d        | 35.57 | 35.88 | 0.01       | 1.00E+00 | no |
| Syap1         | 15.06 | 15.20 | 0.01       | 1.00E+00 | no |
| Akr1a4        | 65.46 | 64.99 | -0.01      | 1.00E+00 | no |
| Ube2r2        | 19.99 | 19.84 | -0.01      | 1.00E+00 | no |
| Mia1          | 0.20  | 0.19  | -0.10      | 1.00E+00 | no |
| OTTMUSG000Rik | 0.00  | 0.01  | 1.79769e+  | 1.00E+00 | no |
| Ube1y1        | 0.02  | 0.00  | -1.79769e- | 1.00E+00 | no |
| Mageb2        | 0.06  | 0.00  | -1.79769e- | 1.00E+00 | no |
| Gm15144       | 0.13  | 0.00  | -1.79769e- | 1.00E+00 | no |
| Mageb1        | 0.02  | 0.00  | -1.79769e- | 1.00E+00 | no |
| 4933432I09Rik | 0.00  | 0.00  | -1.79769e- | 1.00E+00 | no |
| Mfap2         | 0.00  | 0.00  | -1.79769e- | 1.00E+00 | no |
| Rusc2         | 0.00  | 0.00  | -1.79769e- | 1.00E+00 | no |

|               |       |        |      |          |    |
|---------------|-------|--------|------|----------|----|
| Col6a6        | 0.02  | 0.55   | 5.02 | 1.00E+00 | no |
| Kifc3         | 0.48  | 6.11   | 3.66 | 1.00E+00 | no |
| Rnase10       | 0.42  | 3.82   | 3.20 | 1.00E+00 | no |
| Fnip2         | 0.17  | 1.16   | 2.80 | 1.00E+00 | no |
| Hif3a         | 0.09  | 0.63   | 2.75 | 1.00E+00 | no |
| Myo1h         | 0.13  | 0.82   | 2.64 | 1.00E+00 | no |
| Tead1         | 0.10  | 0.53   | 2.45 | 1.00E+00 | no |
| 2010016118Rik | 0.20  | 1.07   | 2.40 | 1.00E+00 | no |
| Olfm1         | 0.25  | 1.31   | 2.38 | 1.00E+00 | no |
| Klra12        | 0.06  | 0.28   | 2.34 | 1.00E+00 | no |
| 2310046K01Ri  | 1.86  | 8.76   | 2.24 | 1.00E+00 | no |
| Pcdhb11       | 0.01  | 0.03   | 2.24 | 1.00E+00 | no |
| Pqlc3         | 28.00 | 128.95 | 2.20 | 1.00E+00 | no |
| Tmod1         | 0.11  | 0.49   | 2.17 | 1.00E+00 | no |
| Kcnp3         | 0.39  | 1.68   | 2.10 | 1.00E+00 | no |
| Ttll11        | 7.63  | 32.72  | 2.10 | 1.00E+00 | no |
| Inadl         | 4.32  | 17.93  | 2.05 | 1.00E+00 | no |
| Runx2         | 0.67  | 2.77   | 2.05 | 1.00E+00 | no |
| Pcdha10       | 0.01  | 0.04   | 2.03 | 1.00E+00 | no |
| Tbc1d9        | 0.40  | 1.62   | 2.03 | 1.00E+00 | no |
| Sema4a        | 1.45  | 5.67   | 1.96 | 1.00E+00 | no |
| Fam114a1      | 0.52  | 2.03   | 1.96 | 1.00E+00 | no |
| Ms4a6c        | 5.50  | 21.07  | 1.94 | 1.00E+00 | no |
| Omd           | 0.02  | 0.08   | 1.93 | 1.00E+00 | no |
| Gm13298       | 0.02  | 0.06   | 1.91 | 1.00E+00 | no |
| Pcdhb5        | 0.02  | 0.08   | 1.84 | 1.00E+00 | no |
| Nfatc2        | 0.41  | 1.44   | 1.82 | 1.00E+00 | no |
| Nek6          | 3.14  | 11.03  | 1.81 | 1.00E+00 | no |
| Acpp          | 0.88  | 3.08   | 1.81 | 1.00E+00 | no |
| Lair1         | 0.55  | 1.87   | 1.76 | 1.00E+00 | no |
| Foxp3         | 0.08  | 0.28   | 1.74 | 1.00E+00 | no |
| Epb4.1l1      | 0.08  | 0.28   | 1.74 | 1.00E+00 | no |
| 4933430H15Ri  | 0.10  | 0.33   | 1.67 | 1.00E+00 | no |
| Pcdhga2       | 0.16  | 0.52   | 1.66 | 1.00E+00 | no |
| Islr          | 0.33  | 1.02   | 1.64 | 1.00E+00 | no |
| Tmem176a      | 7.38  | 22.45  | 1.60 | 1.00E+00 | no |
| Camk2a        | 0.85  | 2.51   | 1.57 | 1.00E+00 | no |
| Frmd4a        | 3.76  | 11.11  | 1.56 | 1.00E+00 | no |
| Thrb          | 3.73  | 10.72  | 1.53 | 1.00E+00 | no |
| Gjb3          | 0.29  | 0.82   | 1.50 | 1.00E+00 | no |
| Pcdhb19       | 0.14  | 0.40   | 1.45 | 1.00E+00 | no |
| Ppfibp2       | 0.73  | 1.96   | 1.43 | 1.00E+00 | no |

|           |       |        |      |          |    |
|-----------|-------|--------|------|----------|----|
| Fkbp10    | 0.02  | 0.04   | 1.43 | 1.00E+00 | no |
| Rara      | 3.88  | 10.49  | 1.43 | 1.00E+00 | no |
| Klra13-ps | 0.04  | 0.10   | 1.43 | 1.00E+00 | no |
| Lrtm2     | 0.33  | 0.86   | 1.39 | 1.00E+00 | no |
| Tom1      | 5.78  | 15.00  | 1.38 | 1.00E+00 | no |
| Klf9      | 2.00  | 5.17   | 1.37 | 1.00E+00 | no |
| Vill      | 1.83  | 4.73   | 1.37 | 1.00E+00 | no |
| Tmem176b  | 19.07 | 49.04  | 1.36 | 1.00E+00 | no |
| Tnfrsf18  | 2.72  | 6.93   | 1.35 | 1.00E+00 | no |
| Syt12     | 1.29  | 3.26   | 1.34 | 1.00E+00 | no |
| Slc41a3   | 0.51  | 1.30   | 1.34 | 1.00E+00 | no |
| Pkp3      | 2.43  | 6.07   | 1.32 | 1.00E+00 | no |
| Gm4659    | 6.46  | 16.04  | 1.31 | 1.00E+00 | no |
| Fbxo6     | 5.41  | 13.11  | 1.28 | 1.00E+00 | no |
| Gimap4    | 14.21 | 34.41  | 1.28 | 1.00E+00 | no |
| Pcdhb20   | 0.13  | 0.31   | 1.26 | 1.00E+00 | no |
| Rell2     | 0.44  | 1.02   | 1.23 | 1.00E+00 | no |
| Iqsec2    | 2.86  | 6.64   | 1.21 | 1.00E+00 | no |
| Ang       | 2.27  | 5.23   | 1.21 | 1.00E+00 | no |
| Pcdhga10  | 0.52  | 1.19   | 1.19 | 1.00E+00 | no |
| Pde8b     | 0.29  | 0.66   | 1.18 | 1.00E+00 | no |
| Lrrc9     | 0.21  | 0.46   | 1.14 | 1.00E+00 | no |
| Pcdhb16   | 0.53  | 1.17   | 1.13 | 1.00E+00 | no |
| Naip7     | 0.10  | 0.22   | 1.13 | 1.00E+00 | no |
| Axl       | 0.66  | 1.43   | 1.12 | 1.00E+00 | no |
| Cnnm2     | 0.85  | 1.82   | 1.11 | 1.00E+00 | no |
| Lrrc50    | 0.05  | 0.11   | 1.09 | 1.00E+00 | no |
| Sirt3     | 13.82 | 29.01  | 1.07 | 1.00E+00 | no |
| Ftl2      | 67.51 | 141.33 | 1.07 | 1.00E+00 | no |
| Thsd4     | 0.03  | 0.06   | 1.03 | 1.00E+00 | no |
| Tmc5      | 0.80  | 1.63   | 1.02 | 1.00E+00 | no |
| Plec      | 8.20  | 16.66  | 1.02 | 1.00E+00 | no |
| Pfkfb2    | 5.55  | 10.97  | 0.98 | 1.00E+00 | no |
| Dyx1c1    | 0.34  | 0.68   | 0.98 | 1.00E+00 | no |
| Pcdhb18   | 0.28  | 0.55   | 0.98 | 1.00E+00 | no |
| Lca5      | 4.80  | 9.44   | 0.98 | 1.00E+00 | no |
| Lpp       | 4.68  | 9.20   | 0.98 | 1.00E+00 | no |
| Arpp21    | 21.56 | 42.07  | 0.96 | 1.00E+00 | no |
| Lgals6    | 0.39  | 0.76   | 0.94 | 1.00E+00 | no |
| Gm5129    | 0.19  | 0.36   | 0.94 | 1.00E+00 | no |
| Rffl      | 8.29  | 15.76  | 0.93 | 1.00E+00 | no |
| Pcdhgb8   | 0.38  | 0.73   | 0.92 | 1.00E+00 | no |

|               |       |       |      |          |    |
|---------------|-------|-------|------|----------|----|
| Insl3         | 1.62  | 3.05  | 0.91 | 1.00E+00 | no |
| LOC100503704  | 1.37  | 2.53  | 0.89 | 1.00E+00 | no |
| Stk32c        | 0.32  | 0.59  | 0.88 | 1.00E+00 | no |
| Extl2         | 1.96  | 3.60  | 0.87 | 1.00E+00 | no |
| Dnahc11       | 0.06  | 0.11  | 0.87 | 1.00E+00 | no |
| Cabyr         | 0.32  | 0.59  | 0.86 | 1.00E+00 | no |
| Osbpl5        | 4.51  | 8.18  | 0.86 | 1.00E+00 | no |
| Rtkn          | 0.36  | 0.65  | 0.85 | 1.00E+00 | no |
| Tubd1         | 10.48 | 18.84 | 0.85 | 1.00E+00 | no |
| Pcdhb22       | 0.31  | 0.56  | 0.83 | 1.00E+00 | no |
| Gstm4         | 2.92  | 5.15  | 0.82 | 1.00E+00 | no |
| Mbp           | 15.47 | 27.16 | 0.81 | 1.00E+00 | no |
| Msmg          | 0.64  | 1.12  | 0.81 | 1.00E+00 | no |
| Bcl11a        | 32.55 | 56.46 | 0.79 | 1.00E+00 | no |
| C130026121Rik | 2.24  | 3.86  | 0.79 | 1.00E+00 | no |
| Tacc2         | 0.90  | 1.54  | 0.78 | 1.00E+00 | no |
| Pcdhb17       | 0.61  | 1.04  | 0.78 | 1.00E+00 | no |
| Pdcd4         | 25.83 | 43.78 | 0.76 | 1.00E+00 | no |
| Dlgap4        | 9.38  | 15.83 | 0.75 | 1.00E+00 | no |
| Gba           | 16.50 | 27.83 | 0.75 | 1.00E+00 | no |
| Pigp          | 12.02 | 20.24 | 0.75 | 1.00E+00 | no |
| Irf1          | 28.22 | 47.50 | 0.75 | 1.00E+00 | no |
| Rusc1         | 4.89  | 8.23  | 0.75 | 1.00E+00 | no |
| Ttn           | 0.01  | 0.01  | 0.75 | 1.00E+00 | no |
| P2rx2         | 0.13  | 0.21  | 0.75 | 1.00E+00 | no |
| Pcdhgb5       | 0.82  | 1.38  | 0.75 | 1.00E+00 | no |
| Zfmx3         | 0.36  | 0.60  | 0.74 | 1.00E+00 | no |
| Epsti1        | 11.05 | 18.41 | 0.74 | 1.00E+00 | no |
| Tmem192       | 14.61 | 24.25 | 0.73 | 1.00E+00 | no |
| Pcdhga4       | 0.39  | 0.65  | 0.73 | 1.00E+00 | no |
| Mta3          | 23.27 | 38.23 | 0.72 | 1.00E+00 | no |
| Cacnb1        | 13.09 | 21.39 | 0.71 | 1.00E+00 | no |
| Gm8979        | 4.44  | 7.21  | 0.70 | 1.00E+00 | no |
| Fam198a       | 1.84  | 2.98  | 0.69 | 1.00E+00 | no |
| Ntng2         | 3.04  | 4.92  | 0.69 | 1.00E+00 | no |
| Sytl3         | 0.73  | 1.18  | 0.69 | 1.00E+00 | no |
| Als2          | 4.73  | 7.61  | 0.69 | 1.00E+00 | no |
| Serinc4       | 0.85  | 1.36  | 0.68 | 1.00E+00 | no |
| Pcdhga8       | 0.36  | 0.58  | 0.68 | 1.00E+00 | no |
| Heatr7a       | 7.33  | 11.64 | 0.67 | 1.00E+00 | no |
| Havcr1        | 0.23  | 0.37  | 0.67 | 1.00E+00 | no |
| Pcdhb7        | 0.01  | 0.02  | 0.66 | 1.00E+00 | no |

|               |        |        |      |          |    |
|---------------|--------|--------|------|----------|----|
| Ksr2          | 0.22   | 0.35   | 0.66 | 1.00E+00 | no |
| Ipcef1        | 11.52  | 18.22  | 0.66 | 1.00E+00 | no |
| Pcdhgb2       | 0.42   | 0.67   | 0.66 | 1.00E+00 | no |
| Rufy4         | 0.16   | 0.26   | 0.65 | 1.00E+00 | no |
| Maml2         | 5.72   | 8.99   | 0.65 | 1.00E+00 | no |
| Pcyt1a        | 14.95  | 23.42  | 0.65 | 1.00E+00 | no |
| Gmfg          | 69.69  | 107.93 | 0.63 | 1.00E+00 | no |
| Tsc22d3       | 33.09  | 51.03  | 0.62 | 1.00E+00 | no |
| Mllt3         | 7.38   | 11.31  | 0.62 | 1.00E+00 | no |
| Klhl7         | 3.35   | 5.09   | 0.60 | 1.00E+00 | no |
| Smcr8         | 18.37  | 27.83  | 0.60 | 1.00E+00 | no |
| D330028D13R   | 5.44   | 8.23   | 0.60 | 1.00E+00 | no |
| 1810062O18Ri  | 1.30   | 1.96   | 0.59 | 1.00E+00 | no |
| Tagap         | 17.52  | 26.46  | 0.59 | 1.00E+00 | no |
| Smarca2       | 5.71   | 8.59   | 0.59 | 1.00E+00 | no |
| Lrrc39        | 2.17   | 3.22   | 0.57 | 1.00E+00 | no |
| Ctnnd1        | 5.40   | 8.01   | 0.57 | 1.00E+00 | no |
| Tcf7l2        | 6.86   | 10.14  | 0.56 | 1.00E+00 | no |
| Slc37a2       | 6.39   | 9.41   | 0.56 | 1.00E+00 | no |
| Pcdhgb6       | 1.41   | 2.07   | 0.56 | 1.00E+00 | no |
| Pacsin1       | 0.37   | 0.55   | 0.56 | 1.00E+00 | no |
| Pde2a         | 143.27 | 210.19 | 0.55 | 1.00E+00 | no |
| Ltk           | 7.25   | 10.60  | 0.55 | 1.00E+00 | no |
| Slc2a9        | 3.25   | 4.75   | 0.55 | 1.00E+00 | no |
| Glra4         | 0.12   | 0.18   | 0.55 | 1.00E+00 | no |
| Pqlc1         | 5.42   | 7.88   | 0.54 | 1.00E+00 | no |
| Slc2a6        | 0.50   | 0.73   | 0.54 | 1.00E+00 | no |
| Ifi27l1       | 61.21  | 88.20  | 0.53 | 1.00E+00 | no |
| Hk1           | 14.07  | 20.25  | 0.52 | 1.00E+00 | no |
| Rasa4         | 20.59  | 29.62  | 0.52 | 1.00E+00 | no |
| A830010M20F   | 6.26   | 8.97   | 0.52 | 1.00E+00 | no |
| 4931406C07Ri  | 6.22   | 8.91   | 0.52 | 1.00E+00 | no |
| Cox7a2l       | 175.77 | 251.50 | 0.52 | 1.00E+00 | no |
| 1700018L02Ril | 1.17   | 1.67   | 0.52 | 1.00E+00 | no |
| Pcdhb21       | 0.12   | 0.18   | 0.52 | 1.00E+00 | no |
| 5730528L13Ril | 0.81   | 1.15   | 0.51 | 1.00E+00 | no |
| Lamp2         | 32.73  | 46.62  | 0.51 | 1.00E+00 | no |
| Slc25a2       | 0.16   | 0.22   | 0.51 | 1.00E+00 | no |
| Cdkl2         | 0.13   | 0.18   | 0.51 | 1.00E+00 | no |
| Kdm4c         | 9.09   | 12.90  | 0.50 | 1.00E+00 | no |
| Pcdhga3       | 0.27   | 0.39   | 0.50 | 1.00E+00 | no |
| Rwdd3         | 2.07   | 2.93   | 0.50 | 1.00E+00 | no |

|               |        |        |      |          |    |
|---------------|--------|--------|------|----------|----|
| AU040320      | 11.35  | 16.00  | 0.50 | 1.00E+00 | no |
| Tmtc3         | 4.84   | 6.81   | 0.49 | 1.00E+00 | no |
| Sgce          | 1.51   | 2.13   | 0.49 | 1.00E+00 | no |
| D730040F13Ri  | 15.52  | 21.83  | 0.49 | 1.00E+00 | no |
| Spg20         | 7.52   | 10.56  | 0.49 | 1.00E+00 | no |
| Txnrd3        | 13.12  | 18.40  | 0.49 | 1.00E+00 | no |
| Slc3a1        | 0.10   | 0.13   | 0.47 | 1.00E+00 | no |
| Prkg1         | 0.13   | 0.18   | 0.47 | 1.00E+00 | no |
| 8430408G22Ri  | 0.09   | 0.12   | 0.46 | 1.00E+00 | no |
| Mtap7         | 24.68  | 33.93  | 0.46 | 1.00E+00 | no |
| Cbfa2t3       | 16.53  | 22.71  | 0.46 | 1.00E+00 | no |
| Uckl1os       | 2.08   | 2.84   | 0.45 | 1.00E+00 | no |
| Kalrn         | 0.38   | 0.52   | 0.45 | 1.00E+00 | no |
| Ccl27a        | 2.31   | 3.17   | 0.45 | 1.00E+00 | no |
| Pcdhgb1       | 0.39   | 0.53   | 0.45 | 1.00E+00 | no |
| Pet117        | 0.80   | 1.09   | 0.45 | 1.00E+00 | no |
| Gm2002        | 0.10   | 0.13   | 0.44 | 1.00E+00 | no |
| Htatip2       | 8.67   | 11.78  | 0.44 | 1.00E+00 | no |
| Satb1         | 17.08  | 23.22  | 0.44 | 1.00E+00 | no |
| Abhd1         | 0.75   | 1.02   | 0.44 | 1.00E+00 | no |
| 1700088E04Ri  | 0.21   | 0.28   | 0.44 | 1.00E+00 | no |
| Sbsn          | 1.08   | 1.47   | 0.44 | 1.00E+00 | no |
| A530088E08Ri  | 1.98   | 2.68   | 0.44 | 1.00E+00 | no |
| Akap2         | 3.97   | 5.37   | 0.44 | 1.00E+00 | no |
| Slc15a2       | 6.41   | 8.67   | 0.44 | 1.00E+00 | no |
| Airn          | 1.31   | 1.77   | 0.44 | 1.00E+00 | no |
| A230020J21Ril | 0.11   | 0.15   | 0.43 | 1.00E+00 | no |
| Gm7334        | 11.09  | 14.97  | 0.43 | 1.00E+00 | no |
| Rnf13         | 14.26  | 19.19  | 0.43 | 1.00E+00 | no |
| Cyfip1        | 9.96   | 13.34  | 0.42 | 1.00E+00 | no |
| Aspn          | 0.12   | 0.16   | 0.42 | 1.00E+00 | no |
| Evi2a         | 4.52   | 6.04   | 0.42 | 1.00E+00 | no |
| Pak6          | 0.29   | 0.38   | 0.41 | 1.00E+00 | no |
| Hnrnpul1      | 118.14 | 157.25 | 0.41 | 1.00E+00 | no |
| Sri           | 29.79  | 39.64  | 0.41 | 1.00E+00 | no |
| Trpt1         | 3.35   | 4.45   | 0.41 | 1.00E+00 | no |
| Rabgap1       | 12.25  | 16.29  | 0.41 | 1.00E+00 | no |
| Pbx1          | 1.26   | 1.68   | 0.41 | 1.00E+00 | no |
| Syn1          | 0.11   | 0.14   | 0.40 | 1.00E+00 | no |
| Pcdhga11      | 0.50   | 0.66   | 0.40 | 1.00E+00 | no |
| Prx           | 0.89   | 1.17   | 0.39 | 1.00E+00 | no |
| Tmem42        | 4.97   | 6.52   | 0.39 | 1.00E+00 | no |

|              |       |       |      |          |    |
|--------------|-------|-------|------|----------|----|
| Tead3        | 0.28  | 0.36  | 0.39 | 1.00E+00 | no |
| 2900079G21Ri | 0.57  | 0.75  | 0.38 | 1.00E+00 | no |
| Il15ra       | 3.54  | 4.62  | 0.38 | 1.00E+00 | no |
| Zbp1         | 4.00  | 5.21  | 0.38 | 1.00E+00 | no |
| Raet1a       | 0.40  | 0.52  | 0.38 | 1.00E+00 | no |
| Abcc5        | 7.18  | 9.34  | 0.38 | 1.00E+00 | no |
| Dnajb2       | 3.31  | 4.29  | 0.38 | 1.00E+00 | no |
| Lonp2        | 20.22 | 26.23 | 0.38 | 1.00E+00 | no |
| Pde4d        | 8.36  | 10.84 | 0.37 | 1.00E+00 | no |
| Oxr1         | 36.76 | 47.63 | 0.37 | 1.00E+00 | no |
| Cd160        | 0.41  | 0.52  | 0.37 | 1.00E+00 | no |
| Bcas1        | 0.22  | 0.28  | 0.36 | 1.00E+00 | no |
| Susd2        | 0.22  | 0.28  | 0.36 | 1.00E+00 | no |
| Tmsb15l      | 1.74  | 2.24  | 0.36 | 1.00E+00 | no |
| Ly96         | 4.10  | 5.27  | 0.36 | 1.00E+00 | no |
| Ttc23        | 0.54  | 0.70  | 0.36 | 1.00E+00 | no |
| Cdh29        | 0.74  | 0.96  | 0.36 | 1.00E+00 | no |
| Capn3        | 0.25  | 0.32  | 0.36 | 1.00E+00 | no |
| Lrrc18       | 0.40  | 0.51  | 0.36 | 1.00E+00 | no |
| Pex3         | 6.56  | 8.38  | 0.35 | 1.00E+00 | no |
| Rnf41        | 11.38 | 14.48 | 0.35 | 1.00E+00 | no |
| Nphp3        | 1.82  | 2.31  | 0.35 | 1.00E+00 | no |
| Dnase1l1     | 4.31  | 5.48  | 0.35 | 1.00E+00 | no |
| Nrp1         | 1.08  | 1.37  | 0.34 | 1.00E+00 | no |
| Rreb1        | 20.90 | 26.46 | 0.34 | 1.00E+00 | no |
| Plcx1        | 1.58  | 2.00  | 0.33 | 1.00E+00 | no |
| Lepre1       | 0.52  | 0.66  | 0.33 | 1.00E+00 | no |
| Echdc1       | 2.78  | 3.49  | 0.33 | 1.00E+00 | no |
| Ccdc39       | 0.15  | 0.19  | 0.33 | 1.00E+00 | no |
| Cyth3        | 5.85  | 7.33  | 0.33 | 1.00E+00 | no |
| Ccdc90b      | 7.77  | 9.73  | 0.32 | 1.00E+00 | no |
| Nnt          | 52.38 | 65.37 | 0.32 | 1.00E+00 | no |
| 1700028K03Ri | 0.78  | 0.98  | 0.32 | 1.00E+00 | no |
| Ifih1        | 2.41  | 3.01  | 0.32 | 1.00E+00 | no |
| Zfp960       | 1.68  | 2.08  | 0.31 | 1.00E+00 | no |
| Pcdhga5      | 0.76  | 0.94  | 0.31 | 1.00E+00 | no |
| Mical2       | 0.03  | 0.04  | 0.31 | 1.00E+00 | no |
| 1700086O06Ri | 2.62  | 3.26  | 0.31 | 1.00E+00 | no |
| Gtpbp8       | 8.89  | 11.02 | 0.31 | 1.00E+00 | no |
| Tmem49       | 14.15 | 17.53 | 0.31 | 1.00E+00 | no |
| Mga          | 18.84 | 23.33 | 0.31 | 1.00E+00 | no |
| App          | 1.11  | 1.37  | 0.31 | 1.00E+00 | no |

|              |       |       |      |          |    |
|--------------|-------|-------|------|----------|----|
| Pkd2l2       | 2.98  | 3.69  | 0.31 | 1.00E+00 | no |
| Slc39a14     | 3.39  | 4.18  | 0.30 | 1.00E+00 | no |
| Phactr2      | 6.12  | 7.51  | 0.30 | 1.00E+00 | no |
| BC030307     | 2.06  | 2.53  | 0.30 | 1.00E+00 | no |
| Arhgap32     | 2.60  | 3.19  | 0.29 | 1.00E+00 | no |
| Mitf         | 0.31  | 0.38  | 0.29 | 1.00E+00 | no |
| Bdh1         | 10.26 | 12.56 | 0.29 | 1.00E+00 | no |
| Fbrsl1       | 7.17  | 8.75  | 0.29 | 1.00E+00 | no |
| Fgfr3        | 0.11  | 0.14  | 0.29 | 1.00E+00 | no |
| Pcdhgb7      | 1.07  | 1.31  | 0.29 | 1.00E+00 | no |
| Calr3        | 0.55  | 0.67  | 0.28 | 1.00E+00 | no |
| St6galnac6   | 3.77  | 4.58  | 0.28 | 1.00E+00 | no |
| Arhgap15     | 29.09 | 35.38 | 0.28 | 1.00E+00 | no |
| Slnf8        | 8.40  | 10.18 | 0.28 | 1.00E+00 | no |
| Glmn         | 6.75  | 8.17  | 0.28 | 1.00E+00 | no |
| Fyco1        | 7.36  | 8.91  | 0.28 | 1.00E+00 | no |
| Fxyd5        | 14.87 | 17.97 | 0.27 | 1.00E+00 | no |
| Cmya5        | 0.26  | 0.31  | 0.27 | 1.00E+00 | no |
| Rnf144b      | 1.46  | 1.76  | 0.27 | 1.00E+00 | no |
| Rbms1        | 15.10 | 18.19 | 0.27 | 1.00E+00 | no |
| 1810020D17Ri | 8.71  | 10.48 | 0.27 | 1.00E+00 | no |
| Prkacb       | 39.00 | 46.90 | 0.27 | 1.00E+00 | no |
| Sgk1         | 35.78 | 43.00 | 0.27 | 1.00E+00 | no |
| Pcdhgb4      | 0.56  | 0.68  | 0.26 | 1.00E+00 | no |
| Cdc42ep4     | 3.21  | 3.84  | 0.26 | 1.00E+00 | no |
| Ptptra       | 22.33 | 26.61 | 0.25 | 1.00E+00 | no |
| Taf1b        | 15.26 | 18.19 | 0.25 | 1.00E+00 | no |
| Zbtb38       | 3.49  | 4.16  | 0.25 | 1.00E+00 | no |
| Sirt4        | 7.88  | 9.37  | 0.25 | 1.00E+00 | no |
| Vps26a       | 24.74 | 29.41 | 0.25 | 1.00E+00 | no |
| Marveld2     | 1.81  | 2.14  | 0.25 | 1.00E+00 | no |
| Slc38a10     | 28.23 | 33.45 | 0.24 | 1.00E+00 | no |
| Dach2        | 0.18  | 0.21  | 0.24 | 1.00E+00 | no |
| Acbd6        | 26.61 | 31.45 | 0.24 | 1.00E+00 | no |
| Ikbkg        | 11.67 | 13.71 | 0.23 | 1.00E+00 | no |
| Fcrl1        | 4.08  | 4.79  | 0.23 | 1.00E+00 | no |
| Fstl3        | 0.33  | 0.38  | 0.23 | 1.00E+00 | no |
| Nucb1        | 32.85 | 38.41 | 0.23 | 1.00E+00 | no |
| Clip2        | 2.02  | 2.36  | 0.22 | 1.00E+00 | no |
| Txnrd1       | 31.87 | 37.22 | 0.22 | 1.00E+00 | no |
| Cd151        | 8.47  | 9.88  | 0.22 | 1.00E+00 | no |
| Mfsd6        | 6.61  | 7.69  | 0.22 | 1.00E+00 | no |



|          |       |       |      |          |    |
|----------|-------|-------|------|----------|----|
| Lats2    | 10.29 | 11.95 | 0.22 | 1.00E+00 | no |
| Abca2    | 9.90  | 11.47 | 0.21 | 1.00E+00 | no |
| Ccdc23   | 17.33 | 20.09 | 0.21 | 1.00E+00 | no |
| Rfesd    | 3.86  | 4.45  | 0.20 | 1.00E+00 | no |
| Comt     | 12.11 | 13.91 | 0.20 | 1.00E+00 | no |
| Dis3l2   | 11.04 | 12.68 | 0.20 | 1.00E+00 | no |
| Pcdhga1  | 0.40  | 0.46  | 0.19 | 1.00E+00 | no |
| Atp2b4   | 13.40 | 15.31 | 0.19 | 1.00E+00 | no |
| Vamp1    | 22.62 | 25.81 | 0.19 | 1.00E+00 | no |
| Abi2     | 8.79  | 10.01 | 0.19 | 1.00E+00 | no |
| Fgd1     | 0.28  | 0.32  | 0.19 | 1.00E+00 | no |
| Hexim2   | 2.33  | 2.65  | 0.19 | 1.00E+00 | no |
| Taf6l    | 11.71 | 13.31 | 0.18 | 1.00E+00 | no |
| Slk      | 20.88 | 23.62 | 0.18 | 1.00E+00 | no |
| Acsm3    | 0.18  | 0.21  | 0.18 | 1.00E+00 | no |
| Lrrc51   | 2.20  | 2.48  | 0.18 | 1.00E+00 | no |
| Srebf2   | 30.81 | 34.75 | 0.17 | 1.00E+00 | no |
| Zbtb3    | 2.12  | 2.39  | 0.17 | 1.00E+00 | no |
| Iqsec1   | 22.13 | 24.94 | 0.17 | 1.00E+00 | no |
| Triobp   | 33.52 | 37.76 | 0.17 | 1.00E+00 | no |
| Nuak2    | 5.76  | 6.49  | 0.17 | 1.00E+00 | no |
| Pira2    | 0.10  | 0.11  | 0.17 | 1.00E+00 | no |
| Mlx      | 20.30 | 22.73 | 0.16 | 1.00E+00 | no |
| Clec5a   | 0.16  | 0.18  | 0.16 | 1.00E+00 | no |
| Ppp6r2   | 11.87 | 13.25 | 0.16 | 1.00E+00 | no |
| Pmel     | 0.88  | 0.98  | 0.16 | 1.00E+00 | no |
| Nfix     | 3.88  | 4.32  | 0.15 | 1.00E+00 | no |
| Lrrfip1  | 34.01 | 37.80 | 0.15 | 1.00E+00 | no |
| Lsp1     | 52.81 | 58.58 | 0.15 | 1.00E+00 | no |
| Hps3     | 12.57 | 13.93 | 0.15 | 1.00E+00 | no |
| Tatdn3   | 2.93  | 3.24  | 0.15 | 1.00E+00 | no |
| Snx12    | 18.26 | 20.20 | 0.15 | 1.00E+00 | no |
| BC057079 | 4.11  | 4.55  | 0.15 | 1.00E+00 | no |
| Gm166    | 1.12  | 1.24  | 0.14 | 1.00E+00 | no |
| Faim     | 16.89 | 18.65 | 0.14 | 1.00E+00 | no |
| Mlxip    | 42.31 | 46.63 | 0.14 | 1.00E+00 | no |
| Kcnq1ot1 | 0.70  | 0.77  | 0.14 | 1.00E+00 | no |
| Gm12166  | 4.59  | 5.04  | 0.14 | 1.00E+00 | no |
| Ano9     | 0.02  | 0.02  | 0.13 | 1.00E+00 | no |
| Mmp19    | 0.06  | 0.07  | 0.13 | 1.00E+00 | no |
| Pigv     | 12.41 | 13.58 | 0.13 | 1.00E+00 | no |
| Atf5     | 11.24 | 12.28 | 0.13 | 1.00E+00 | no |

|              |       |        |      |          |    |
|--------------|-------|--------|------|----------|----|
| Rps24        | 30.46 | 33.27  | 0.13 | 1.00E+00 | no |
| Etohd2       | 1.95  | 2.13   | 0.13 | 1.00E+00 | no |
| Dcaf5        | 10.80 | 11.80  | 0.13 | 1.00E+00 | no |
| Pdpk1        | 27.99 | 30.52  | 0.12 | 1.00E+00 | no |
| Fam134c      | 31.08 | 33.85  | 0.12 | 1.00E+00 | no |
| Ptp4a3       | 91.52 | 99.64  | 0.12 | 1.00E+00 | no |
| Gm4763       | 0.04  | 0.04   | 0.12 | 1.00E+00 | no |
| Hltf         | 13.71 | 14.89  | 0.12 | 1.00E+00 | no |
| Limk2        | 17.98 | 19.54  | 0.12 | 1.00E+00 | no |
| Dctn3        | 20.22 | 21.96  | 0.12 | 1.00E+00 | no |
| Sirpb1a      | 0.07  | 0.08   | 0.12 | 1.00E+00 | no |
| 6030419C18Ri | 0.03  | 0.03   | 0.12 | 1.00E+00 | no |
| Pcdha6       | 0.01  | 0.01   | 0.12 | 1.00E+00 | no |
| Bfar         | 14.89 | 16.12  | 0.11 | 1.00E+00 | no |
| Wasl         | 10.58 | 11.44  | 0.11 | 1.00E+00 | no |
| Tgif1        | 29.18 | 31.48  | 0.11 | 1.00E+00 | no |
| Ralgds       | 8.11  | 8.74   | 0.11 | 1.00E+00 | no |
| Sepp1        | 48.72 | 52.52  | 0.11 | 1.00E+00 | no |
| Ccdc53       | 11.10 | 11.96  | 0.11 | 1.00E+00 | no |
| Lpin2        | 19.12 | 20.60  | 0.11 | 1.00E+00 | no |
| Fchsd2       | 11.41 | 12.29  | 0.11 | 1.00E+00 | no |
| Pibf1        | 5.32  | 5.73   | 0.11 | 1.00E+00 | no |
| Clta         | 95.74 | 103.07 | 0.11 | 1.00E+00 | no |
| Adcy7        | 26.54 | 28.56  | 0.11 | 1.00E+00 | no |
| Rbm41        | 8.63  | 9.28   | 0.10 | 1.00E+00 | no |
| Itpk1        | 13.71 | 14.73  | 0.10 | 1.00E+00 | no |
| Lrfn1        | 0.80  | 0.86   | 0.10 | 1.00E+00 | no |
| Ankrd27      | 12.03 | 12.89  | 0.10 | 1.00E+00 | no |
| Hexdc        | 6.05  | 6.48   | 0.10 | 1.00E+00 | no |
| Pcdhga12     | 0.80  | 0.86   | 0.10 | 1.00E+00 | no |
| Rnase1       | 0.07  | 0.08   | 0.10 | 1.00E+00 | no |
| Prss53       | 0.32  | 0.34   | 0.09 | 1.00E+00 | no |
| Evl          | 31.48 | 33.61  | 0.09 | 1.00E+00 | no |
| Dram2        | 5.49  | 5.86   | 0.09 | 1.00E+00 | no |
| Rnf130       | 23.26 | 24.80  | 0.09 | 1.00E+00 | no |
| Kcng2        | 0.02  | 0.03   | 0.09 | 1.00E+00 | no |
| Sec24c       | 42.38 | 44.98  | 0.09 | 1.00E+00 | no |
| Ctdspl       | 5.56  | 5.90   | 0.09 | 1.00E+00 | no |
| Dock9        | 7.72  | 8.19   | 0.09 | 1.00E+00 | no |
| Ahi1         | 5.36  | 5.68   | 0.08 | 1.00E+00 | no |
| Ak5          | 0.01  | 0.01   | 0.08 | 1.00E+00 | no |
| Cdkl3        | 2.80  | 2.96   | 0.08 | 1.00E+00 | no |

|              |       |       |      |          |    |
|--------------|-------|-------|------|----------|----|
| Sacs         | 6.91  | 7.31  | 0.08 | 1.00E+00 | no |
| Gm5128       | 0.03  | 0.04  | 0.08 | 1.00E+00 | no |
| Cilp2        | 0.03  | 0.04  | 0.08 | 1.00E+00 | no |
| Deptor       | 0.96  | 1.02  | 0.08 | 1.00E+00 | no |
| Ccdc132      | 9.36  | 9.89  | 0.08 | 1.00E+00 | no |
| Tmem164      | 32.94 | 34.74 | 0.08 | 1.00E+00 | no |
| Vangl1       | 0.20  | 0.21  | 0.08 | 1.00E+00 | no |
| Ampd1        | 0.03  | 0.03  | 0.08 | 1.00E+00 | no |
| Ube2g2       | 25.48 | 26.82 | 0.07 | 1.00E+00 | no |
| Sft2d1       | 22.08 | 23.23 | 0.07 | 1.00E+00 | no |
| Myeov2       | 36.29 | 38.18 | 0.07 | 1.00E+00 | no |
| Tor1aip2     | 41.63 | 43.76 | 0.07 | 1.00E+00 | no |
| 9930021D14Ri | 0.84  | 0.88  | 0.07 | 1.00E+00 | no |
| Tmem130      | 0.02  | 0.03  | 0.07 | 1.00E+00 | no |
| Gdf1         | 0.15  | 0.16  | 0.07 | 1.00E+00 | no |
| Taz          | 23.46 | 24.60 | 0.07 | 1.00E+00 | no |
| Ctps2        | 10.42 | 10.92 | 0.07 | 1.00E+00 | no |
| 9130017N09Ri | 0.06  | 0.06  | 0.07 | 1.00E+00 | no |
| Hdhd2        | 10.91 | 11.42 | 0.07 | 1.00E+00 | no |
| Casq1        | 0.08  | 0.09  | 0.07 | 1.00E+00 | no |
| Mttp         | 1.49  | 1.56  | 0.07 | 1.00E+00 | no |
| 4933421E11Ri | 17.38 | 18.17 | 0.06 | 1.00E+00 | no |
| Hsf4         | 0.11  | 0.11  | 0.06 | 1.00E+00 | no |
| Prosc        | 14.64 | 15.29 | 0.06 | 1.00E+00 | no |
| Ms4a4d       | 0.08  | 0.08  | 0.06 | 1.00E+00 | no |
| Angptl6      | 1.02  | 1.07  | 0.06 | 1.00E+00 | no |
| 2210404J11Ri | 12.01 | 12.52 | 0.06 | 1.00E+00 | no |
| Tars2        | 35.17 | 36.66 | 0.06 | 1.00E+00 | no |
| Ccdc88c      | 19.04 | 19.84 | 0.06 | 1.00E+00 | no |
| 1810046J19Ri | 29.74 | 30.98 | 0.06 | 1.00E+00 | no |
| 4930507D05Ri | 0.43  | 0.45  | 0.06 | 1.00E+00 | no |
| Rhcg         | 0.03  | 0.03  | 0.06 | 1.00E+00 | no |
| Madd         | 24.83 | 25.83 | 0.06 | 1.00E+00 | no |
| Aspscr1      | 25.34 | 26.36 | 0.06 | 1.00E+00 | no |
| Fgf22        | 0.16  | 0.16  | 0.06 | 1.00E+00 | no |
| Nox1         | 0.13  | 0.14  | 0.05 | 1.00E+00 | no |
| Hey1         | 0.07  | 0.07  | 0.05 | 1.00E+00 | no |
| Pcdhga7      | 0.33  | 0.34  | 0.05 | 1.00E+00 | no |
| Rtn4         | 21.90 | 22.69 | 0.05 | 1.00E+00 | no |
| Pde4dip      | 4.44  | 4.60  | 0.05 | 1.00E+00 | no |
| Cd80         | 0.20  | 0.20  | 0.05 | 1.00E+00 | no |
| Thns1        | 1.81  | 1.87  | 0.05 | 1.00E+00 | no |

|              |       |       |      |          |    |
|--------------|-------|-------|------|----------|----|
| D19Wsu162e   | 25.22 | 26.06 | 0.05 | 1.00E+00 | no |
| Hist1h2ag    | 0.72  | 0.75  | 0.05 | 1.00E+00 | no |
| Coro2a       | 20.95 | 21.64 | 0.05 | 1.00E+00 | no |
| Loh12cr1     | 8.75  | 9.04  | 0.05 | 1.00E+00 | no |
| 4930481A15Ri | 7.82  | 8.07  | 0.05 | 1.00E+00 | no |
| Ankrd6       | 4.91  | 5.07  | 0.05 | 1.00E+00 | no |
| Kcnj13       | 0.25  | 0.26  | 0.04 | 1.00E+00 | no |
| Acot5        | 0.17  | 0.18  | 0.04 | 1.00E+00 | no |
| Insig2       | 9.93  | 10.24 | 0.04 | 1.00E+00 | no |
| Rab25        | 0.25  | 0.26  | 0.04 | 1.00E+00 | no |
| Serpind1     | 0.12  | 0.12  | 0.04 | 1.00E+00 | no |
| Ifnar2       | 21.91 | 22.58 | 0.04 | 1.00E+00 | no |
| Kdm4a        | 23.07 | 23.77 | 0.04 | 1.00E+00 | no |
| Gli1         | 0.07  | 0.07  | 0.04 | 1.00E+00 | no |
| Cebpe        | 0.14  | 0.14  | 0.04 | 1.00E+00 | no |
| Ptpla        | 6.79  | 6.99  | 0.04 | 1.00E+00 | no |
| Vmn2r86      | 0.05  | 0.05  | 0.04 | 1.00E+00 | no |
| Cyp27b1      | 0.13  | 0.14  | 0.04 | 1.00E+00 | no |
| Wisp2        | 0.04  | 0.04  | 0.04 | 1.00E+00 | no |
| Eps15        | 23.28 | 23.94 | 0.04 | 1.00E+00 | no |
| Tbck         | 6.07  | 6.25  | 0.04 | 1.00E+00 | no |
| Tcfcp2l1     | 0.06  | 0.06  | 0.04 | 1.00E+00 | no |
| Tox3         | 0.07  | 0.07  | 0.04 | 1.00E+00 | no |
| Ppp2r3a      | 1.37  | 1.40  | 0.04 | 1.00E+00 | no |
| Timd4        | 0.07  | 0.07  | 0.04 | 1.00E+00 | no |
| Fam114a2     | 20.72 | 21.23 | 0.04 | 1.00E+00 | no |
| Cntln        | 9.21  | 9.42  | 0.03 | 1.00E+00 | no |
| Zfp277       | 8.91  | 9.12  | 0.03 | 1.00E+00 | no |
| Arhgef15     | 0.05  | 0.05  | 0.03 | 1.00E+00 | no |
| Fbxo30       | 4.98  | 5.09  | 0.03 | 1.00E+00 | no |
| Dux          | 0.10  | 0.10  | 0.03 | 1.00E+00 | no |
| 3830403N18Ri | 0.59  | 0.60  | 0.03 | 1.00E+00 | no |
| Trim10       | 0.03  | 0.03  | 0.03 | 1.00E+00 | no |
| Il17rb       | 0.20  | 0.20  | 0.03 | 1.00E+00 | no |
| Gm2506       | 0.36  | 0.37  | 0.03 | 1.00E+00 | no |
| Rc3h2        | 14.38 | 14.67 | 0.03 | 1.00E+00 | no |
| Oaz3         | 0.47  | 0.48  | 0.03 | 1.00E+00 | no |
| Nat2         | 12.31 | 12.55 | 0.03 | 1.00E+00 | no |
| Krt80        | 0.12  | 0.12  | 0.03 | 1.00E+00 | no |
| Ovol1        | 0.43  | 0.44  | 0.03 | 1.00E+00 | no |
| Gfpt2        | 0.07  | 0.07  | 0.03 | 1.00E+00 | no |
| Kctd1        | 5.27  | 5.37  | 0.03 | 1.00E+00 | no |

|              |       |       |      |          |    |
|--------------|-------|-------|------|----------|----|
| Tcp1111      | 0.15  | 0.16  | 0.03 | 1.00E+00 | no |
| Agfg2        | 17.70 | 18.02 | 0.03 | 1.00E+00 | no |
| Slc44a2      | 65.51 | 66.67 | 0.03 | 1.00E+00 | no |
| 5730416F02Ri | 0.61  | 0.62  | 0.02 | 1.00E+00 | no |
| Eif2ak4      | 11.73 | 11.93 | 0.02 | 1.00E+00 | no |
| Atxn3        | 16.69 | 16.97 | 0.02 | 1.00E+00 | no |
| Akap14       | 0.02  | 0.02  | 0.02 | 1.00E+00 | no |
| AU021092     | 0.05  | 0.05  | 0.02 | 1.00E+00 | no |
| Rtn4rl1      | 0.06  | 0.06  | 0.02 | 1.00E+00 | no |
| 9130019P16Ri | 0.03  | 0.03  | 0.02 | 1.00E+00 | no |
| Gm13375      | 1.99  | 2.02  | 0.02 | 1.00E+00 | no |
| Pcsk6        | 0.02  | 0.02  | 0.02 | 1.00E+00 | no |
| Fbxw7        | 12.17 | 12.33 | 0.02 | 1.00E+00 | no |
| Itga11       | 0.01  | 0.01  | 0.02 | 1.00E+00 | no |
| Pik3r1       | 26.73 | 27.09 | 0.02 | 1.00E+00 | no |
| Camkk2       | 16.63 | 16.85 | 0.02 | 1.00E+00 | no |
| 4932416H05Ri | 1.87  | 1.89  | 0.02 | 1.00E+00 | no |
| C230035I16Ri | 2.61  | 2.64  | 0.02 | 1.00E+00 | no |
| Agbl5        | 17.21 | 17.41 | 0.02 | 1.00E+00 | no |
| Ncs1         | 1.54  | 1.56  | 0.02 | 1.00E+00 | no |
| Nfam1        | 4.20  | 4.25  | 0.02 | 1.00E+00 | no |
| Fkbp7        | 2.56  | 2.59  | 0.02 | 1.00E+00 | no |
| Xrcc6bp1     | 5.93  | 6.00  | 0.02 | 1.00E+00 | no |
| 2010107H07Ri | 17.99 | 18.19 | 0.02 | 1.00E+00 | no |
| Agk          | 8.46  | 8.55  | 0.02 | 1.00E+00 | no |
| Cryz         | 2.36  | 2.38  | 0.02 | 1.00E+00 | no |
| 1700101E01Ri | 0.49  | 0.49  | 0.02 | 1.00E+00 | no |
| Mybpc3       | 0.07  | 0.07  | 0.02 | 1.00E+00 | no |
| Bst2         | 21.14 | 21.36 | 0.01 | 1.00E+00 | no |
| Rad52        | 9.69  | 9.79  | 0.01 | 1.00E+00 | no |
| Kdelc2       | 1.50  | 1.51  | 0.01 | 1.00E+00 | no |
| Rpl38        | 82.81 | 83.65 | 0.01 | 1.00E+00 | no |
| Fam186b      | 0.04  | 0.04  | 0.01 | 1.00E+00 | no |
| Mmp2         | 0.06  | 0.06  | 0.01 | 1.00E+00 | no |
| Pls1         | 0.04  | 0.04  | 0.01 | 1.00E+00 | no |
| Zfp593       | 8.47  | 8.56  | 0.01 | 1.00E+00 | no |
| Cdkn2b       | 0.10  | 0.10  | 0.01 | 1.00E+00 | no |
| Rccd1        | 6.68  | 6.74  | 0.01 | 1.00E+00 | no |
| Cd63         | 0.49  | 0.49  | 0.01 | 1.00E+00 | no |
| Sh3yl1       | 0.94  | 0.95  | 0.01 | 1.00E+00 | no |
| Ccdc115      | 16.63 | 16.78 | 0.01 | 1.00E+00 | no |
| Zfp790       | 5.78  | 5.84  | 0.01 | 1.00E+00 | no |

|               |       |       |      |          |    |
|---------------|-------|-------|------|----------|----|
| Prrt4         | 0.02  | 0.02  | 0.01 | 1.00E+00 | no |
| Mett11d1      | 8.91  | 8.99  | 0.01 | 1.00E+00 | no |
| Fis1          | 55.93 | 56.45 | 0.01 | 1.00E+00 | no |
| Tfpt          | 9.85  | 9.94  | 0.01 | 1.00E+00 | no |
| Zfp69         | 3.72  | 3.75  | 0.01 | 1.00E+00 | no |
| Gpr52         | 0.35  | 0.35  | 0.01 | 1.00E+00 | no |
| Ctla2b        | 0.24  | 0.24  | 0.01 | 1.00E+00 | no |
| Prdm1         | 0.36  | 0.36  | 0.01 | 1.00E+00 | no |
| Cdk5rap3      | 16.98 | 17.13 | 0.01 | 1.00E+00 | no |
| Dpm3          | 27.04 | 27.27 | 0.01 | 1.00E+00 | no |
| Rnft1         | 6.19  | 6.24  | 0.01 | 1.00E+00 | no |
| Tbc1d19       | 5.46  | 5.51  | 0.01 | 1.00E+00 | no |
| Mpnd          | 23.27 | 23.47 | 0.01 | 1.00E+00 | no |
| BC017647      | 4.25  | 4.29  | 0.01 | 1.00E+00 | no |
| Camk2d        | 72.48 | 73.08 | 0.01 | 1.00E+00 | no |
| Mmp21         | 0.04  | 0.04  | 0.01 | 1.00E+00 | no |
| Pard6a        | 7.50  | 7.56  | 0.01 | 1.00E+00 | no |
| Auh           | 8.83  | 8.90  | 0.01 | 1.00E+00 | no |
| Pcca          | 7.29  | 7.35  | 0.01 | 1.00E+00 | no |
| 5430405H02Ri  | 2.72  | 2.74  | 0.01 | 1.00E+00 | no |
| Acat1         | 15.55 | 15.67 | 0.01 | 1.00E+00 | no |
| Qpct          | 0.46  | 0.46  | 0.01 | 1.00E+00 | no |
| Purb          | 25.39 | 25.58 | 0.01 | 1.00E+00 | no |
| Rcn2          | 15.71 | 15.83 | 0.01 | 1.00E+00 | no |
| Trabd         | 23.86 | 24.03 | 0.01 | 1.00E+00 | no |
| BC037034      | 20.30 | 20.45 | 0.01 | 1.00E+00 | no |
| 2310007L24Ril | 0.18  | 0.18  | 0.01 | 1.00E+00 | no |
| Fam174b       | 1.50  | 1.51  | 0.01 | 1.00E+00 | no |
| Arl13b        | 5.74  | 5.78  | 0.01 | 1.00E+00 | no |
| Git1          | 21.16 | 21.31 | 0.01 | 1.00E+00 | no |
| Strn3         | 16.81 | 16.93 | 0.01 | 1.00E+00 | no |
| Tmem128       | 20.24 | 20.38 | 0.01 | 1.00E+00 | no |
| Gm505         | 16.85 | 16.96 | 0.01 | 1.00E+00 | no |
| Prdm15        | 6.69  | 6.73  | 0.01 | 1.00E+00 | no |
| Psmf1         | 11.21 | 11.29 | 0.01 | 1.00E+00 | no |
| Exoc7         | 14.58 | 14.68 | 0.01 | 1.00E+00 | no |
| Cd84          | 10.18 | 10.25 | 0.01 | 1.00E+00 | no |
| Tmem165       | 21.03 | 21.17 | 0.01 | 1.00E+00 | no |
| Pla2g4b       | 6.26  | 6.30  | 0.01 | 1.00E+00 | no |
| 2610001J05Ril | 15.57 | 15.67 | 0.01 | 1.00E+00 | no |
| Zfp592        | 26.64 | 26.81 | 0.01 | 1.00E+00 | no |
| Hfe           | 0.99  | 0.99  | 0.01 | 1.00E+00 | no |

|              |       |       |      |          |    |
|--------------|-------|-------|------|----------|----|
| Skiv2l       | 26.25 | 26.42 | 0.01 | 1.00E+00 | no |
| Vcl          | 9.39  | 9.45  | 0.01 | 1.00E+00 | no |
| Nomo1        | 16.98 | 17.09 | 0.01 | 1.00E+00 | no |
| Atp4a        | 0.28  | 0.28  | 0.01 | 1.00E+00 | no |
| Ubox5        | 4.08  | 4.11  | 0.01 | 1.00E+00 | no |
| Ncoa6        | 15.50 | 15.60 | 0.01 | 1.00E+00 | no |
| Tdrd3        | 6.45  | 6.49  | 0.01 | 1.00E+00 | no |
| Zzef1        | 15.56 | 15.66 | 0.01 | 1.00E+00 | no |
| B3gat3       | 19.81 | 19.93 | 0.01 | 1.00E+00 | no |
| Ppil2        | 21.94 | 22.08 | 0.01 | 1.00E+00 | no |
| Gabarapl2    | 16.83 | 16.93 | 0.01 | 1.00E+00 | no |
| Rybp         | 13.45 | 13.53 | 0.01 | 1.00E+00 | no |
| Rgs19        | 26.92 | 27.08 | 0.01 | 1.00E+00 | no |
| Rabif        | 17.52 | 17.63 | 0.01 | 1.00E+00 | no |
| Oaz2-ps      | 23.45 | 23.59 | 0.01 | 1.00E+00 | no |
| Smap1        | 21.73 | 21.86 | 0.01 | 1.00E+00 | no |
| Phip         | 34.11 | 34.31 | 0.01 | 1.00E+00 | no |
| Bod1l        | 16.02 | 16.11 | 0.01 | 1.00E+00 | no |
| Rprd1a       | 14.78 | 14.87 | 0.01 | 1.00E+00 | no |
| Rbm38        | 65.55 | 65.93 | 0.01 | 1.00E+00 | no |
| Col4a6       | 0.01  | 0.01  | 0.01 | 1.00E+00 | no |
| Fam151b      | 1.44  | 1.45  | 0.01 | 1.00E+00 | no |
| Ube3b        | 22.90 | 23.03 | 0.01 | 1.00E+00 | no |
| Trip4        | 6.88  | 6.92  | 0.01 | 1.00E+00 | no |
| 1810030O07Ri | 18.42 | 18.52 | 0.01 | 1.00E+00 | no |
| Fbxo8        | 7.12  | 7.15  | 0.01 | 1.00E+00 | no |
| Limd1        | 33.49 | 33.67 | 0.01 | 1.00E+00 | no |
| Tmem167b     | 17.46 | 17.55 | 0.01 | 1.00E+00 | no |
| Vps24        | 24.40 | 24.53 | 0.01 | 1.00E+00 | no |
| Zfp518a      | 16.17 | 16.25 | 0.01 | 1.00E+00 | no |
| Htra2        | 30.13 | 30.28 | 0.01 | 1.00E+00 | no |
| Isoc2a       | 16.92 | 17.00 | 0.01 | 1.00E+00 | no |
| Sepn1        | 2.51  | 2.53  | 0.01 | 1.00E+00 | no |
| Clcn4-2      | 16.67 | 16.76 | 0.01 | 1.00E+00 | no |
| Gin1         | 7.68  | 7.72  | 0.01 | 1.00E+00 | no |
| Xcl1         | 0.15  | 0.15  | 0.01 | 1.00E+00 | no |
| Mypn         | 0.01  | 0.01  | 0.01 | 1.00E+00 | no |
| Vrk2         | 11.31 | 11.37 | 0.01 | 1.00E+00 | no |
| 4930430F08Ri | 2.98  | 3.00  | 0.01 | 1.00E+00 | no |
| Tyms-ps      | 10.18 | 10.23 | 0.01 | 1.00E+00 | no |
| Kbtbd2       | 21.19 | 21.28 | 0.01 | 1.00E+00 | no |
| Pnpla2       | 22.09 | 22.19 | 0.01 | 1.00E+00 | no |

|              |       |       |      |          |    |
|--------------|-------|-------|------|----------|----|
| Nprl3        | 6.88  | 6.91  | 0.01 | 1.00E+00 | no |
| Ubxn2a       | 11.09 | 11.13 | 0.01 | 1.00E+00 | no |
| Wbp2         | 36.70 | 36.84 | 0.01 | 1.00E+00 | no |
| Fam175b      | 16.32 | 16.38 | 0.01 | 1.00E+00 | no |
| D16H22S680E  | 7.71  | 7.74  | 0.01 | 1.00E+00 | no |
| Itga2b       | 0.11  | 0.11  | 0.01 | 1.00E+00 | no |
| Rundc1       | 7.97  | 8.00  | 0.01 | 1.00E+00 | no |
| Trip12       | 33.08 | 33.20 | 0.01 | 1.00E+00 | no |
| C130022K22Ri | 11.14 | 11.19 | 0.01 | 1.00E+00 | no |
| Atg3         | 15.40 | 15.46 | 0.01 | 1.00E+00 | no |
| Phtf1        | 16.21 | 16.26 | 0.01 | 1.00E+00 | no |
| Cfp          | 5.06  | 5.08  | 0.01 | 1.00E+00 | no |
| 1810013L24Ri | 15.12 | 15.18 | 0.01 | 1.00E+00 | no |
| 1110020G09Ri | 18.27 | 18.33 | 0.01 | 1.00E+00 | no |
| Map3k10      | 3.42  | 3.43  | 0.00 | 1.00E+00 | no |
| Slc25a44     | 11.29 | 11.33 | 0.00 | 1.00E+00 | no |
| Tmem98       | 12.86 | 12.91 | 0.00 | 1.00E+00 | no |
| Foxj3        | 19.23 | 19.29 | 0.00 | 1.00E+00 | no |
| Nenf         | 4.92  | 4.94  | 0.00 | 1.00E+00 | no |
| Ei24         | 23.52 | 23.60 | 0.00 | 1.00E+00 | no |
| Tmem147      | 24.21 | 24.29 | 0.00 | 1.00E+00 | no |
| Sgsm3        | 5.05  | 5.07  | 0.00 | 1.00E+00 | no |
| 2610044O15Ri | 12.22 | 12.26 | 0.00 | 1.00E+00 | no |
| Pcyt2        | 18.90 | 18.96 | 0.00 | 1.00E+00 | no |
| Pdcd2l       | 12.26 | 12.30 | 0.00 | 1.00E+00 | no |
| Gm10778      | 4.01  | 4.02  | 0.00 | 1.00E+00 | no |
| D030016E14Ri | 15.05 | 15.10 | 0.00 | 1.00E+00 | no |
| Mrps35       | 18.15 | 18.20 | 0.00 | 1.00E+00 | no |
| Osgep        | 24.70 | 24.77 | 0.00 | 1.00E+00 | no |
| M6pr         | 54.05 | 54.21 | 0.00 | 1.00E+00 | no |
| Stap1        | 11.44 | 11.47 | 0.00 | 1.00E+00 | no |
| S1pr1        | 9.12  | 9.15  | 0.00 | 1.00E+00 | no |
| Rapgef2      | 4.03  | 4.04  | 0.00 | 1.00E+00 | no |
| Cnpy3        | 23.12 | 23.19 | 0.00 | 1.00E+00 | no |
| Mgst1        | 20.71 | 20.76 | 0.00 | 1.00E+00 | no |
| Usf2         | 45.27 | 45.39 | 0.00 | 1.00E+00 | no |
| Gng5         | 30.85 | 30.93 | 0.00 | 1.00E+00 | no |
| Mrpl27       | 16.16 | 16.20 | 0.00 | 1.00E+00 | no |
| Lmtk2        | 13.64 | 13.68 | 0.00 | 1.00E+00 | no |
| Kcnmb1       | 0.09  | 0.09  | 0.00 | 1.00E+00 | no |
| Map2k7       | 29.62 | 29.69 | 0.00 | 1.00E+00 | no |
| Pdzk1        | 3.15  | 3.16  | 0.00 | 1.00E+00 | no |



|              |       |       |      |          |    |
|--------------|-------|-------|------|----------|----|
| Smg5         | 31.34 | 31.40 | 0.00 | 1.00E+00 | no |
| Gm6907       | 2.84  | 2.84  | 0.00 | 1.00E+00 | no |
| Zbed6        | 29.14 | 29.20 | 0.00 | 1.00E+00 | no |
| Uqcrh        | 77.73 | 77.88 | 0.00 | 1.00E+00 | no |
| Slc12a6      | 64.32 | 64.45 | 0.00 | 1.00E+00 | no |
| Ndst2        | 11.09 | 11.11 | 0.00 | 1.00E+00 | no |
| Zfp869       | 20.98 | 21.02 | 0.00 | 1.00E+00 | no |
| Phtf2        | 12.96 | 12.99 | 0.00 | 1.00E+00 | no |
| Dmtf1        | 25.55 | 25.59 | 0.00 | 1.00E+00 | no |
| Tor1b        | 14.97 | 14.99 | 0.00 | 1.00E+00 | no |
| Pofut1       | 14.58 | 14.60 | 0.00 | 1.00E+00 | no |
| Tnrc6a       | 23.26 | 23.29 | 0.00 | 1.00E+00 | no |
| Wwp1         | 5.45  | 5.46  | 0.00 | 1.00E+00 | no |
| Tstd1        | 3.70  | 3.71  | 0.00 | 1.00E+00 | no |
| Rbm20        | 0.02  | 0.02  | 0.00 | 1.00E+00 | no |
| Zfp959       | 8.15  | 8.16  | 0.00 | 1.00E+00 | no |
| Zfp493       | 2.14  | 2.14  | 0.00 | 1.00E+00 | no |
| Rbm5         | 42.06 | 42.11 | 0.00 | 1.00E+00 | no |
| Trrap        | 24.09 | 24.12 | 0.00 | 1.00E+00 | no |
| Gtf2f2       | 17.64 | 17.66 | 0.00 | 1.00E+00 | no |
| Rnf113a1     | 3.45  | 3.46  | 0.00 | 1.00E+00 | no |
| Nthl1        | 3.14  | 3.15  | 0.00 | 1.00E+00 | no |
| Dnahc8       | 11.50 | 11.51 | 0.00 | 1.00E+00 | no |
| Rbl2         | 15.46 | 15.47 | 0.00 | 1.00E+00 | no |
| BC020402     | 2.25  | 2.25  | 0.00 | 1.00E+00 | no |
| Arhgef7      | 15.44 | 15.45 | 0.00 | 1.00E+00 | no |
| Samd9l       | 19.85 | 19.86 | 0.00 | 1.00E+00 | no |
| Mars2        | 17.11 | 17.12 | 0.00 | 1.00E+00 | no |
| Ercc2        | 19.19 | 19.21 | 0.00 | 1.00E+00 | no |
| Trappc8      | 20.84 | 20.85 | 0.00 | 1.00E+00 | no |
| Cpsf4l       | 0.79  | 0.79  | 0.00 | 1.00E+00 | no |
| Abhd2        | 14.20 | 14.21 | 0.00 | 1.00E+00 | no |
| 2310003F16Ri | 30.16 | 30.17 | 0.00 | 1.00E+00 | no |
| Morf4l1      | 9.69  | 9.70  | 0.00 | 1.00E+00 | no |
| Dph2         | 11.39 | 11.39 | 0.00 | 1.00E+00 | no |
| Bcap29       | 15.38 | 15.38 | 0.00 | 1.00E+00 | no |
| Paip1        | 12.63 | 12.63 | 0.00 | 1.00E+00 | no |
| 0610008F07Ri | 0.00  | 0.00  | 0.00 | 1.00E+00 | no |
| 0610010B08Ri | 0.00  | 0.00  | 0.00 | 1.00E+00 | no |
| 0610012H03Ri | 0.00  | 0.00  | 0.00 | 1.00E+00 | no |
| 100043387,OT | 0.00  | 0.00  | 0.00 | 1.00E+00 | no |
| 1110012J17Ri | 0.00  | 0.00  | 0.00 | 1.00E+00 | no |

|              |      |      |      |          |    |
|--------------|------|------|------|----------|----|
| 1110017D15Ri | 0.00 | 0.00 | 0.00 | 1.00E+00 | no |
| 1110032A04Ri | 0.00 | 0.00 | 0.00 | 1.00E+00 | no |
| 1110059M19R  | 0.00 | 0.00 | 0.00 | 1.00E+00 | no |
| 1190003J15Ri | 0.00 | 0.00 | 0.00 | 1.00E+00 | no |
| 1190003K10Ri | 0.00 | 0.00 | 0.00 | 1.00E+00 | no |
| 1200009I06Ri | 0.00 | 0.00 | 0.00 | 1.00E+00 | no |
| 1500017E21Ri | 0.00 | 0.00 | 0.00 | 1.00E+00 | no |
| 1600014K23Ri | 0.00 | 0.00 | 0.00 | 1.00E+00 | no |
| 1600015I10Ri | 0.00 | 0.00 | 0.00 | 1.00E+00 | no |
| 1600029I14Ri | 0.00 | 0.00 | 0.00 | 1.00E+00 | no |
| 1600029O15Ri | 0.04 | 0.00 | 0.00 | 1.00E+00 | no |
| 1700001C02Ri | 0.00 | 0.00 | 0.00 | 1.00E+00 | no |
| 1700001F09Ri | 0.00 | 0.00 | 0.00 | 1.00E+00 | no |
| 1700001L19Ri | 0.00 | 0.00 | 0.00 | 1.00E+00 | no |
| 1700003G18Ri | 0.00 | 0.00 | 0.00 | 1.00E+00 | no |
| 1700003H04Ri | 0.00 | 0.00 | 0.00 | 1.00E+00 | no |
| 1700006A11Ri | 0.00 | 0.00 | 0.00 | 1.00E+00 | no |
| 1700006E09Ri | 0.00 | 0.00 | 0.00 | 1.00E+00 | no |
| 1700007B14Ri | 0.00 | 0.00 | 0.00 | 1.00E+00 | no |
| 1700007E06Ri | 0.00 | 0.00 | 0.00 | 1.00E+00 | no |
| 1700007G11Ri | 0.00 | 0.00 | 0.00 | 1.00E+00 | no |
| 1700007K13Ri | 0.00 | 0.00 | 0.00 | 1.00E+00 | no |
| 1700008A04Ri | 0.00 | 0.00 | 0.00 | 1.00E+00 | no |
| 1700008F21Ri | 0.00 | 0.00 | 0.00 | 1.00E+00 | no |
| 1700008I05Ri | 0.00 | 0.00 | 0.00 | 1.00E+00 | no |
| 1700008P02Ri | 0.00 | 0.00 | 0.00 | 1.00E+00 | no |
| 1700008P20Ri | 0.00 | 0.00 | 0.00 | 1.00E+00 | no |
| 1700009J07Ri | 0.00 | 0.00 | 0.00 | 1.00E+00 | no |
| 1700009N14Ri | 0.00 | 0.00 | 0.00 | 1.00E+00 | no |
| 1700010D01Ri | 0.00 | 0.00 | 0.00 | 1.00E+00 | no |
| 1700010M22R  | 0.00 | 0.00 | 0.00 | 1.00E+00 | no |
| 1700011A15Ri | 0.00 | 0.00 | 0.00 | 1.00E+00 | no |
| 1700011E24Ri | 0.00 | 0.00 | 0.00 | 1.00E+00 | no |
| 1700011F03Ri | 0.00 | 0.00 | 0.00 | 1.00E+00 | no |
| 1700011F14Ri | 0.00 | 0.00 | 0.00 | 1.00E+00 | no |
| 1700011H14Ri | 0.00 | 0.00 | 0.00 | 1.00E+00 | no |
| 1700011I03Ri | 0.00 | 0.00 | 0.00 | 1.00E+00 | no |
| 1700012A03Ri | 0.00 | 0.00 | 0.00 | 1.00E+00 | no |
| 1700012B07Ri | 0.00 | 0.00 | 0.00 | 1.00E+00 | no |
| 1700012P22Ri | 0.00 | 0.00 | 0.00 | 1.00E+00 | no |
| 1700013B16Ri | 0.00 | 0.00 | 0.00 | 1.00E+00 | no |
| 1700013D24Ri | 0.00 | 0.00 | 0.00 | 1.00E+00 | no |

|               |      |      |      |          |    |
|---------------|------|------|------|----------|----|
| 1700013F07Ri  | 0.00 | 0.00 | 0.00 | 1.00E+00 | no |
| 1700013G24Ri  | 0.00 | 0.00 | 0.00 | 1.00E+00 | no |
| 1700013H16Ri  | 0.00 | 0.00 | 0.00 | 1.00E+00 | no |
| 1700014N06Ri  | 0.00 | 0.00 | 0.00 | 1.00E+00 | no |
| 1700015G11Ri  | 0.00 | 0.00 | 0.00 | 1.00E+00 | no |
| 1700016H13Ri  | 0.00 | 0.00 | 0.00 | 1.00E+00 | no |
| 1700016M24R   | 0.00 | 0.00 | 0.00 | 1.00E+00 | no |
| 1700017D01Ri  | 0.00 | 0.00 | 0.00 | 1.00E+00 | no |
| 1700017N19Ri  | 0.00 | 0.00 | 0.00 | 1.00E+00 | no |
| 1700018A04Ri  | 0.00 | 0.00 | 0.00 | 1.00E+00 | no |
| 1700018B08Ri  | 0.00 | 0.00 | 0.00 | 1.00E+00 | no |
| 1700018B24Ri  | 0.00 | 0.00 | 0.00 | 1.00E+00 | no |
| 1700018F24Ri  | 0.00 | 0.00 | 0.00 | 1.00E+00 | no |
| 1700019M22R   | 0.00 | 0.00 | 0.00 | 1.00E+00 | no |
| 1700019N19Ri  | 0.00 | 0.00 | 0.00 | 1.00E+00 | no |
| 1700021F07Ri  | 0.00 | 0.00 | 0.00 | 1.00E+00 | no |
| 1700022A21Ri  | 0.00 | 0.00 | 0.00 | 1.00E+00 | no |
| 1700023A16Ri  | 0.00 | 0.00 | 0.00 | 1.00E+00 | no |
| 1700023I07Rik | 0.00 | 0.00 | 0.00 | 1.00E+00 | no |
| 1700024G13Ri  | 0.00 | 0.00 | 0.00 | 1.00E+00 | no |
| 1700024P04Ri  | 0.00 | 0.00 | 0.00 | 1.00E+00 | no |
| 1700025C18Ri  | 0.00 | 0.00 | 0.00 | 1.00E+00 | no |
| 1700025E21Ri  | 0.00 | 0.00 | 0.00 | 1.00E+00 | no |
| 1700025F22Ri  | 0.00 | 0.00 | 0.00 | 1.00E+00 | no |
| 1700026D08Ri  | 0.00 | 0.00 | 0.00 | 1.00E+00 | no |
| 1700027A23Ri  | 0.00 | 0.00 | 0.00 | 1.00E+00 | no |
| 1700028B04Ri  | 0.00 | 0.00 | 0.00 | 1.00E+00 | no |
| 1700028M03R   | 0.00 | 0.00 | 0.00 | 1.00E+00 | no |
| 1700028P14Ri  | 0.00 | 0.00 | 0.00 | 1.00E+00 | no |
| 1700029F12Ri  | 0.00 | 0.00 | 0.00 | 1.00E+00 | no |
| 1700029M20R   | 0.00 | 0.00 | 0.00 | 1.00E+00 | no |
| 1700029P11Ri  | 0.00 | 0.00 | 0.00 | 1.00E+00 | no |
| 1700030F18Ri  | 0.00 | 0.00 | 0.00 | 1.00E+00 | no |
| 1700031F05Ri  | 0.00 | 0.00 | 0.00 | 1.00E+00 | no |
| 1700031M16R   | 0.00 | 0.00 | 0.00 | 1.00E+00 | no |
| 1700034E13Ri  | 0.00 | 0.00 | 0.00 | 1.00E+00 | no |
| 1700034J05RiH | 0.00 | 0.00 | 0.00 | 1.00E+00 | no |
| 1700034O15Ri  | 0.00 | 0.00 | 0.00 | 1.00E+00 | no |
| 1700041C23Ri  | 0.00 | 0.00 | 0.00 | 1.00E+00 | no |
| 1700042B14Ri  | 0.00 | 0.00 | 0.00 | 1.00E+00 | no |
| 1700042G07Ri  | 0.00 | 0.00 | 0.00 | 1.00E+00 | no |
| 1700044K03Ri  | 0.00 | 0.00 | 0.00 | 1.00E+00 | no |

|               |       |       |      |          |    |
|---------------|-------|-------|------|----------|----|
| 1700045I19Rik | 0.00  | 0.00  | 0.00 | 1.00E+00 | no |
| 1700047M11R   | 0.00  | 0.00  | 0.00 | 1.00E+00 | no |
| 1700049E15Ri  | 0.00  | 0.00  | 0.00 | 1.00E+00 | no |
| 1700052I22Rik | 0.00  | 0.00  | 0.00 | 1.00E+00 | no |
| 1700054K19Ri  | 0.00  | 0.00  | 0.00 | 1.00E+00 | no |
| 1700054O13Ri  | 0.00  | 0.00  | 0.00 | 1.00E+00 | no |
| 1700057G04Ri  | 0.00  | 0.00  | 0.00 | 1.00E+00 | no |
| 1700057K13Ri  | 0.00  | 0.00  | 0.00 | 1.00E+00 | no |
| 1700058C13Ri  | 0.00  | 0.00  | 0.00 | 1.00E+00 | no |
| 1700060C20Ri  | 0.00  | 0.00  | 0.00 | 1.00E+00 | no |
| 1700061J05Rik | 0.00  | 0.00  | 0.00 | 1.00E+00 | no |
| 1700066O22Ri  | 0.00  | 0.00  | 0.00 | 1.00E+00 | no |
| 1700067P10Ri  | 0.00  | 0.00  | 0.00 | 1.00E+00 | no |
| 1700069L16Ril | 0.00  | 0.00  | 0.00 | 1.00E+00 | no |
| 1700072E05Ri  | 0.00  | 0.00  | 0.00 | 1.00E+00 | no |
| 1700073E17Ri  | 0.00  | 0.00  | 0.00 | 1.00E+00 | no |
| 1700074P13Ri  | 0.00  | 0.00  | 0.00 | 1.00E+00 | no |
| 1700080E11Ri  | 0.00  | 0.00  | 0.00 | 1.00E+00 | no |
| 1700080O16Ri  | 0.00  | 0.00  | 0.00 | 1.00E+00 | no |
| 1700086L19Ril | 0.00  | 0.00  | 0.00 | 1.00E+00 | no |
| 1700090G07Ri  | 0.00  | 0.00  | 0.00 | 1.00E+00 | no |
| 1700094C09Ri  | 0.00  | 0.00  | 0.00 | 1.00E+00 | no |
| 1700108F19Ri  | 0.00  | 0.00  | 0.00 | 1.00E+00 | no |
| 1700108M19R   | 0.00  | 0.00  | 0.00 | 1.00E+00 | no |
| 1700109F18Ri  | 0.00  | 0.00  | 0.00 | 1.00E+00 | no |
| 1700109G14Ri  | 0.00  | 0.00  | 0.00 | 1.00E+00 | no |
| 1700110M21R   | 0.00  | 0.00  | 0.00 | 1.00E+00 | no |
| 1700111N16Ri  | 0.00  | 0.00  | 0.00 | 1.00E+00 | no |
| 1700113H08Ri  | 0.00  | 0.00  | 0.00 | 1.00E+00 | no |
| 1700121N20Ri  | 0.00  | 0.00  | 0.00 | 1.00E+00 | no |
| 1700123K08Ri  | 0.00  | 0.00  | 0.00 | 1.00E+00 | no |
| 1700123L14Ril | 0.00  | 0.00  | 0.00 | 1.00E+00 | no |
| 1700123O20Ri  | 15.26 | 14.25 | 0.00 | 1.00E+00 | no |
| 1700125D06Ri  | 0.00  | 0.00  | 0.00 | 1.00E+00 | no |
| 1700129C05Ri  | 0.00  | 0.00  | 0.00 | 1.00E+00 | no |
| 1810009J06Rik | 0.00  | 0.00  | 0.00 | 1.00E+00 | no |
| 1810011O10Ri  | 0.00  | 0.00  | 0.00 | 1.00E+00 | no |
| 1810019J16Rik | 0.00  | 0.00  | 0.00 | 1.00E+00 | no |
| 1810030J14Rik | 0.00  | 0.00  | 0.00 | 1.00E+00 | no |
| 1810064F22Ri  | 0.00  | 0.00  | 0.00 | 1.00E+00 | no |
| 2010003K11Ri  | 0.00  | 0.00  | 0.00 | 1.00E+00 | no |
| 2010003K15Ri  | 0.00  | 0.00  | 0.00 | 1.00E+00 | no |

|               |      |      |      |          |    |
|---------------|------|------|------|----------|----|
| 2010106E10Ri  | 0.00 | 0.00 | 0.00 | 1.00E+00 | no |
| 2200001I15Rik | 0.00 | 0.00 | 0.00 | 1.00E+00 | no |
| 2210010C04Ri  | 0.00 | 0.00 | 0.00 | 1.00E+00 | no |
| 2210407C18Ri  | 0.00 | 0.00 | 0.00 | 1.00E+00 | no |
| 2210415F13Ri  | 0.00 | 0.00 | 0.00 | 1.00E+00 | no |
| 2300002M23R   | 0.00 | 0.00 | 0.00 | 1.00E+00 | no |
| 2300003K06Ri  | 0.00 | 0.00 | 0.00 | 1.00E+00 | no |
| 2300005B03Ri  | 0.00 | 0.00 | 0.00 | 1.00E+00 | no |
| 2310001K24Ri  | 0.00 | 0.00 | 0.00 | 1.00E+00 | no |
| 2310002J15Rik | 0.00 | 0.00 | 0.00 | 1.00E+00 | no |
| 2310002L09Rik | 0.00 | 0.00 | 0.00 | 1.00E+00 | no |
| 2310007B03Ri  | 0.00 | 0.00 | 0.00 | 1.00E+00 | no |
| 2310010M20R   | 0.00 | 0.00 | 0.00 | 1.00E+00 | no |
| 2310021H06Ri  | 0.00 | 0.00 | 0.00 | 1.00E+00 | no |
| 2310030G06Ri  | 0.00 | 0.00 | 0.00 | 1.00E+00 | no |
| 2310034C09Ri  | 0.00 | 0.00 | 0.00 | 1.00E+00 | no |
| 2310042E22Ri  | 0.00 | 0.00 | 0.00 | 1.00E+00 | no |
| 2310046A06Ri  | 0.00 | 0.00 | 0.00 | 1.00E+00 | no |
| 2310050B05Ri  | 0.00 | 0.00 | 0.00 | 1.00E+00 | no |
| 2310050C09Ri  | 0.00 | 0.00 | 0.00 | 1.00E+00 | no |
| 2310057J16Rik | 0.00 | 0.00 | 0.00 | 1.00E+00 | no |
| 2310057J18Rik | 0.00 | 0.00 | 0.00 | 1.00E+00 | no |
| 2310057N15Ri  | 0.00 | 0.00 | 0.00 | 1.00E+00 | no |
| 2310061N02Ri  | 0.00 | 0.00 | 0.00 | 1.00E+00 | no |
| 2310079G19Ri  | 0.00 | 0.00 | 0.00 | 1.00E+00 | no |
| 2410012M07R   | 0.00 | 0.00 | 0.00 | 1.00E+00 | no |
| 2410137F16Ri  | 0.00 | 0.00 | 0.00 | 1.00E+00 | no |
| 2410137M14R   | 0.00 | 0.00 | 0.00 | 1.00E+00 | no |
| 2610017I09Rik | 0.00 | 0.00 | 0.00 | 1.00E+00 | no |
| 2610100L16Rik | 0.00 | 0.00 | 0.00 | 1.00E+00 | no |
| 2610109H07Ri  | 0.00 | 0.00 | 0.00 | 1.00E+00 | no |
| 2610203C20Ri  | 0.00 | 0.00 | 0.00 | 1.00E+00 | no |
| 2610203C22Ri  | 0.00 | 0.00 | 0.00 | 1.00E+00 | no |
| 2610528J11Rik | 0.00 | 0.00 | 0.00 | 1.00E+00 | no |
| 2700046A07Ri  | 0.00 | 0.00 | 0.00 | 1.00E+00 | no |
| 2810007J24Rik | 0.00 | 0.00 | 0.00 | 1.00E+00 | no |
| 2810032G03Ri  | 0.00 | 0.00 | 0.00 | 1.00E+00 | no |
| 2810405F15Ri  | 0.00 | 0.00 | 0.00 | 1.00E+00 | no |
| 2810433D01Ri  | 0.00 | 0.00 | 0.00 | 1.00E+00 | no |
| 2810459M11R   | 0.00 | 0.00 | 0.00 | 1.00E+00 | no |
| 2900011O08Ri  | 0.00 | 0.00 | 0.00 | 1.00E+00 | no |
| 2900052N01Ri  | 0.00 | 0.00 | 0.00 | 1.00E+00 | no |

|              |      |      |      |          |    |
|--------------|------|------|------|----------|----|
| 2900092C05Ri | 0.00 | 0.00 | 0.00 | 1.00E+00 | no |
| 2900092D14Ri | 0.00 | 0.00 | 0.00 | 1.00E+00 | no |
| 3110035E14Ri | 0.00 | 0.00 | 0.00 | 1.00E+00 | no |
| 3110039M20R  | 0.00 | 0.00 | 0.00 | 1.00E+00 | no |
| 3110079O15Ri | 0.00 | 0.00 | 0.00 | 1.00E+00 | no |
| 3110082D06Ri | 0.00 | 0.00 | 0.00 | 1.00E+00 | no |
| 3110099E03Ri | 0.00 | 0.00 | 0.00 | 1.00E+00 | no |
| 3830417A13Ri | 0.00 | 0.00 | 0.00 | 1.00E+00 | no |
| 3830431G21Ri | 0.00 | 0.00 | 0.00 | 1.00E+00 | no |
| 4632428N05Ri | 1.95 | 0.00 | 0.00 | 1.00E+00 | no |
| 4732415M23R  | 0.00 | 0.00 | 0.00 | 1.00E+00 | no |
| 4732456N10Ri | 0.00 | 0.00 | 0.00 | 1.00E+00 | no |
| 4732471J01Ri | 0.22 | 0.60 | 0.00 | 1.00E+00 | no |
| 4832428D23Ri | 0.00 | 0.00 | 0.00 | 1.00E+00 | no |
| 4833423E24Ri | 0.00 | 0.00 | 0.00 | 1.00E+00 | no |
| 4833424O15Ri | 0.00 | 0.00 | 0.00 | 1.00E+00 | no |
| 4833427G06Ri | 0.00 | 0.00 | 0.00 | 1.00E+00 | no |
| 4921501E09Ri | 0.00 | 0.00 | 0.00 | 1.00E+00 | no |
| 4921504E06Ri | 0.00 | 0.00 | 0.00 | 1.00E+00 | no |
| 4921509C19Ri | 0.00 | 0.00 | 0.00 | 1.00E+00 | no |
| 4921510H08Ri | 0.00 | 0.00 | 0.00 | 1.00E+00 | no |
| 4921511C20Ri | 0.00 | 0.00 | 0.00 | 1.00E+00 | no |
| 4921511H03Ri | 0.00 | 0.00 | 0.00 | 1.00E+00 | no |
| 4921517D21Ri | 0.00 | 0.00 | 0.00 | 1.00E+00 | no |
| 4921517D22Ri | 0.00 | 0.00 | 0.00 | 1.00E+00 | no |
| 4921521F21Ri | 0.00 | 0.00 | 0.00 | 1.00E+00 | no |
| 4921524L21Ri | 0.00 | 0.00 | 0.00 | 1.00E+00 | no |
| 4921528I01Ri | 0.00 | 0.00 | 0.00 | 1.00E+00 | no |
| 4921528O07Ri | 0.00 | 0.00 | 0.00 | 1.00E+00 | no |
| 4921530L21Ri | 0.00 | 0.00 | 0.00 | 1.00E+00 | no |
| 4921539E11Ri | 0.00 | 0.00 | 0.00 | 1.00E+00 | no |
| 4922501L14Ri | 0.00 | 0.00 | 0.00 | 1.00E+00 | no |
| 4922505E12Ri | 0.00 | 0.00 | 0.00 | 1.00E+00 | no |
| 4930403L05Ri | 0.00 | 0.00 | 0.00 | 1.00E+00 | no |
| 4930404A10Ri | 0.00 | 0.00 | 0.00 | 1.00E+00 | no |
| 4930408F14Ri | 0.00 | 0.00 | 0.00 | 1.00E+00 | no |
| 4930415L06Ri | 0.00 | 0.00 | 0.00 | 1.00E+00 | no |
| 4930417O13Ri | 0.00 | 0.00 | 0.00 | 1.00E+00 | no |
| 4930428D18Ri | 0.00 | 0.00 | 0.00 | 1.00E+00 | no |
| 4930428E23Ri | 0.00 | 0.00 | 0.00 | 1.00E+00 | no |
| 4930429F11Ri | 0.00 | 0.00 | 0.00 | 1.00E+00 | no |
| 4930430A15Ri | 0.00 | 0.00 | 0.00 | 1.00E+00 | no |

|               |      |      |      |          |    |
|---------------|------|------|------|----------|----|
| 4930432K09Ri  | 0.00 | 0.00 | 0.00 | 1.00E+00 | no |
| 4930433I11Rik | 0.00 | 0.00 | 0.00 | 1.00E+00 | no |
| 4930433N12Ri  | 0.00 | 0.00 | 0.00 | 1.00E+00 | no |
| 4930435E12Ri  | 0.00 | 0.00 | 0.00 | 1.00E+00 | no |
| 4930442L01Ril | 0.00 | 0.00 | 0.00 | 1.00E+00 | no |
| 4930443G12Ri  | 0.00 | 0.00 | 0.00 | 1.00E+00 | no |
| 4930448K20Ri  | 0.00 | 0.00 | 0.00 | 1.00E+00 | no |
| 4930449I24Rik | 0.00 | 0.00 | 0.00 | 1.00E+00 | no |
| 4930451C15Ri  | 0.00 | 0.00 | 0.00 | 1.00E+00 | no |
| 4930451I11Rik | 0.00 | 0.00 | 0.00 | 1.00E+00 | no |
| 4930458L03Ril | 0.00 | 0.00 | 0.00 | 1.00E+00 | no |
| 4930470P17Ri  | 0.00 | 0.00 | 0.00 | 1.00E+00 | no |
| 4930471G03Ri  | 0.00 | 0.00 | 0.00 | 1.00E+00 | no |
| 4930474M22R   | 0.00 | 0.00 | 0.00 | 1.00E+00 | no |
| 4930474N05Ri  | 0.00 | 0.00 | 0.00 | 1.00E+00 | no |
| 4930479M11R   | 0.00 | 0.00 | 0.00 | 1.00E+00 | no |
| 4930480E11Ri  | 0.00 | 0.00 | 0.00 | 1.00E+00 | no |
| 4930502E18Ri  | 0.00 | 0.00 | 0.00 | 1.00E+00 | no |
| 4930503B20Ri  | 0.00 | 0.00 | 0.00 | 1.00E+00 | no |
| 4930503E14Ri  | 0.00 | 0.00 | 0.00 | 1.00E+00 | no |
| 4930503H13Ri  | 0.00 | 0.00 | 0.00 | 1.00E+00 | no |
| 4930504O13Ri  | 0.00 | 0.00 | 0.00 | 1.00E+00 | no |
| 4930505A04Ri  | 0.00 | 0.00 | 0.00 | 1.00E+00 | no |
| 4930506M07R   | 0.00 | 0.00 | 0.00 | 1.00E+00 | no |
| 4930511I11Rik | 0.00 | 0.00 | 0.00 | 1.00E+00 | no |
| 4930511M06R   | 0.00 | 0.00 | 0.00 | 1.00E+00 | no |
| 4930511M11R   | 0.00 | 0.00 | 0.00 | 1.00E+00 | no |
| 4930519F16Ri  | 0.00 | 0.00 | 0.00 | 1.00E+00 | no |
| 4930521A18Ri  | 0.00 | 0.00 | 0.00 | 1.00E+00 | no |
| 4930522H14Ri  | 0.00 | 0.00 | 0.00 | 1.00E+00 | no |
| 4930524B15Ri  | 0.00 | 0.00 | 0.00 | 1.00E+00 | no |
| 4930524E20Ri  | 0.00 | 0.00 | 0.00 | 1.00E+00 | no |
| 4930526D03Ri  | 0.00 | 0.00 | 0.00 | 1.00E+00 | no |
| 4930526I15Rik | 0.00 | 0.00 | 0.00 | 1.00E+00 | no |
| 4930528F23Ri  | 0.00 | 0.00 | 0.00 | 1.00E+00 | no |
| 4930529F22Ri  | 0.00 | 0.00 | 0.00 | 1.00E+00 | no |
| 4930542N07Ri  | 0.00 | 0.00 | 0.00 | 1.00E+00 | no |
| 4930544D05Ri  | 0.00 | 0.00 | 0.00 | 1.00E+00 | no |
| 4930544G11Ri  | 0.00 | 0.00 | 0.00 | 1.00E+00 | no |
| 4930547C10Ri  | 0.00 | 0.00 | 0.00 | 1.00E+00 | no |
| 4930549C01Ri  | 0.00 | 0.00 | 0.00 | 1.00E+00 | no |
| 4930550L24Ril | 0.00 | 0.00 | 0.00 | 1.00E+00 | no |

|               |      |      |      |          |    |
|---------------|------|------|------|----------|----|
| 4930555G01Ri  | 0.00 | 0.00 | 0.00 | 1.00E+00 | no |
| 4930555I21Rik | 0.00 | 0.00 | 0.00 | 1.00E+00 | no |
| 4930558C23Ri  | 0.00 | 0.00 | 0.00 | 1.00E+00 | no |
| 4930567H17Ri  | 0.00 | 0.00 | 0.00 | 1.00E+00 | no |
| 4930568D16Ri  | 0.00 | 0.00 | 0.00 | 1.00E+00 | no |
| 4930571K23Ri  | 0.00 | 0.00 | 0.00 | 1.00E+00 | no |
| 4930578C19Ri  | 0.00 | 0.00 | 0.00 | 1.00E+00 | no |
| 4930578I06Rik | 0.00 | 0.00 | 0.00 | 1.00E+00 | no |
| 4930579F01Ri  | 0.00 | 0.00 | 0.00 | 1.00E+00 | no |
| 4930584F24Ri  | 0.00 | 0.00 | 0.00 | 1.00E+00 | no |
| 4930595M18R   | 0.00 | 0.00 | 0.00 | 1.00E+00 | no |
| 4930596D02Ri  | 0.00 | 0.00 | 0.00 | 1.00E+00 | no |
| 4931406B18Ri  | 0.00 | 0.00 | 0.00 | 1.00E+00 | no |
| 4931407G18Ri  | 0.00 | 0.00 | 0.00 | 1.00E+00 | no |
| 4931408A02Ri  | 0.00 | 0.00 | 0.00 | 1.00E+00 | no |
| 4931408C20Ri  | 0.00 | 0.00 | 0.00 | 1.00E+00 | no |
| 4931409K22Ri  | 0.00 | 0.00 | 0.00 | 1.00E+00 | no |
| 4931417E11Ri  | 0.00 | 0.00 | 0.00 | 1.00E+00 | no |
| 4931423N10Ri  | 0.00 | 0.00 | 0.00 | 1.00E+00 | no |
| 4931428L18Ril | 0.00 | 0.00 | 0.00 | 1.00E+00 | no |
| 4931440L10Ril | 0.00 | 0.00 | 0.00 | 1.00E+00 | no |
| 4932411E22Ri  | 0.00 | 0.00 | 0.00 | 1.00E+00 | no |
| 4932411G14Ri  | 0.00 | 0.00 | 0.00 | 1.00E+00 | no |
| 4932411N23Ri  | 0.00 | 0.00 | 0.00 | 1.00E+00 | no |
| 4932414J04Ril | 0.00 | 0.00 | 0.00 | 1.00E+00 | no |
| 4932414N04Ri  | 0.00 | 0.00 | 0.00 | 1.00E+00 | no |
| 4932415M13R   | 0.00 | 0.00 | 0.00 | 1.00E+00 | no |
| 4932418E24Ri  | 0.00 | 0.00 | 0.00 | 1.00E+00 | no |
| 4932429P05Ri  | 0.00 | 0.00 | 0.00 | 1.00E+00 | no |
| 4932441B19Ri  | 0.00 | 0.00 | 0.00 | 1.00E+00 | no |
| 4932441J04Ril | 0.00 | 0.00 | 0.00 | 1.00E+00 | no |
| 4932443I19Rik | 0.00 | 0.00 | 0.00 | 1.00E+00 | no |
| 4933400A11Ri  | 0.00 | 0.00 | 0.00 | 1.00E+00 | no |
| 4933400F21Ri  | 0.00 | 0.00 | 0.00 | 1.00E+00 | no |
| 4933401B06Ri  | 0.00 | 0.00 | 0.00 | 1.00E+00 | no |
| 4933402E13Ri  | 0.00 | 0.00 | 0.00 | 1.00E+00 | no |
| 4933402J07Ril | 0.00 | 0.00 | 0.00 | 1.00E+00 | no |
| 4933402N03Ri  | 0.00 | 0.00 | 0.00 | 1.00E+00 | no |
| 4933402N22Ri  | 0.00 | 0.00 | 0.00 | 1.00E+00 | no |
| 4933402P03Ri  | 0.00 | 0.00 | 0.00 | 1.00E+00 | no |
| 4933403O03Ri  | 0.00 | 0.00 | 0.00 | 1.00E+00 | no |
| 4933403O08Ri  | 0.00 | 0.00 | 0.00 | 1.00E+00 | no |



|               |      |      |      |          |    |
|---------------|------|------|------|----------|----|
| 4933404M02R   | 0.00 | 0.00 | 0.00 | 1.00E+00 | no |
| 4933405O20Ri  | 0.00 | 0.00 | 0.00 | 1.00E+00 | no |
| 4933406F09Ri  | 0.00 | 0.00 | 0.00 | 1.00E+00 | no |
| 4933406J08Ri  | 0.00 | 0.00 | 0.00 | 1.00E+00 | no |
| 4933406K04Ri  | 0.00 | 0.00 | 0.00 | 1.00E+00 | no |
| 4933406M09R   | 0.00 | 0.00 | 0.00 | 1.00E+00 | no |
| 4933407P14Ri  | 0.00 | 0.00 | 0.00 | 1.00E+00 | no |
| 4933409G03Ri  | 0.00 | 0.00 | 0.00 | 1.00E+00 | no |
| 4933411G11Ri  | 0.00 | 0.00 | 0.00 | 1.00E+00 | no |
| 4933412E24Ri  | 0.00 | 0.00 | 0.00 | 1.00E+00 | no |
| 4933416C03Ri  | 0.00 | 0.00 | 0.00 | 1.00E+00 | no |
| 4933417A18Ri  | 0.00 | 0.00 | 0.00 | 1.00E+00 | no |
| 4933421I07Rik | 0.00 | 0.00 | 0.00 | 1.00E+00 | no |
| 4933422H20Ri  | 0.00 | 0.00 | 0.00 | 1.00E+00 | no |
| 4933427D06Ri  | 0.00 | 0.00 | 0.00 | 1.00E+00 | no |
| 4933429O19Ri  | 0.00 | 0.00 | 0.00 | 1.00E+00 | no |
| 4933434I20Rik | 0.00 | 0.00 | 0.00 | 1.00E+00 | no |
| 4933436I01Rik | 0.00 | 0.00 | 0.00 | 1.00E+00 | no |
| 5031410I06Rik | 0.00 | 0.00 | 0.00 | 1.00E+00 | no |
| 5031426D15Ri  | 0.00 | 0.00 | 0.00 | 1.00E+00 | no |
| 5033404E19Ri  | 0.00 | 0.00 | 0.00 | 1.00E+00 | no |
| 5330413P13Ri  | 0.00 | 0.00 | 0.00 | 1.00E+00 | no |
| 5330434G04Ri  | 0.00 | 0.00 | 0.00 | 1.00E+00 | no |
| 5330437I02Rik | 0.00 | 0.00 | 0.00 | 1.00E+00 | no |
| 5330439B14Ri  | 0.00 | 0.00 | 0.00 | 1.00E+00 | no |
| 5430402E10Ri  | 0.00 | 0.00 | 0.00 | 1.00E+00 | no |
| 5430405G05Ri  | 0.00 | 0.00 | 0.00 | 1.00E+00 | no |
| 5430407P10Ri  | 0.00 | 0.00 | 0.00 | 1.00E+00 | no |
| 5430416O09Ri  | 0.00 | 0.00 | 0.00 | 1.00E+00 | no |
| 5430419D17Ri  | 0.00 | 0.00 | 0.00 | 1.00E+00 | no |
| 5530400C23Ri  | 0.00 | 0.00 | 0.00 | 1.00E+00 | no |
| 5730409E04Ri  | 0.00 | 0.00 | 0.00 | 1.00E+00 | no |
| 5930412G12Ri  | 0.00 | 0.00 | 0.00 | 1.00E+00 | no |
| 6030405A18Ri  | 0.00 | 0.00 | 0.00 | 1.00E+00 | no |
| 6330407J23Rik | 0.00 | 0.00 | 0.00 | 1.00E+00 | no |
| 6330527O06Ri  | 0.00 | 0.00 | 0.00 | 1.00E+00 | no |
| 6430411K18Ri  | 0.00 | 0.00 | 0.00 | 1.00E+00 | no |
| 6430548M08R   | 0.00 | 0.00 | 0.00 | 1.00E+00 | no |
| 6430573F11Ri  | 0.00 | 0.00 | 0.00 | 1.00E+00 | no |
| 6530411M01R   | 0.00 | 0.00 | 0.00 | 1.00E+00 | no |
| 7420426K07Ri  | 0.00 | 0.00 | 0.00 | 1.00E+00 | no |
| 7420461P10Ri  | 0.00 | 0.00 | 0.00 | 1.00E+00 | no |

|              |      |      |      |          |    |
|--------------|------|------|------|----------|----|
| 7530420F21Ri | 0.00 | 0.00 | 0.00 | 1.00E+00 | no |
| 8030411F24Ri | 0.00 | 0.00 | 0.00 | 1.00E+00 | no |
| 8430431K14Ri | 0.00 | 0.00 | 0.00 | 1.00E+00 | no |
| 9030612E09Ri | 0.00 | 0.00 | 0.00 | 1.00E+00 | no |
| 9130204L05Ri | 0.00 | 0.00 | 0.00 | 1.00E+00 | no |
| 9130209A04Ri | 0.00 | 0.00 | 0.00 | 1.00E+00 | no |
| 9130404H23Ri | 0.00 | 0.00 | 0.00 | 1.00E+00 | no |
| 9130409I23Ri | 0.00 | 0.00 | 0.00 | 1.00E+00 | no |
| 9230102K24Ri | 0.00 | 0.00 | 0.00 | 1.00E+00 | no |
| 9230104L09Ri | 0.00 | 0.00 | 0.00 | 1.00E+00 | no |
| 9230107M04R  | 0.00 | 0.00 | 0.00 | 1.00E+00 | no |
| 9230110F15Ri | 0.00 | 0.00 | 0.00 | 1.00E+00 | no |
| 9230113P08Ri | 0.00 | 0.00 | 0.00 | 1.00E+00 | no |
| 9330111N05Ri | 0.00 | 0.00 | 0.00 | 1.00E+00 | no |
| 9330158H04Ri | 0.00 | 0.00 | 0.00 | 1.00E+00 | no |
| 9330159F19Ri | 0.00 | 0.00 | 0.00 | 1.00E+00 | no |
| 9430007A20Ri | 0.00 | 0.00 | 0.00 | 1.00E+00 | no |
| 9430021M05R  | 0.00 | 0.00 | 0.00 | 1.00E+00 | no |
| 9430031J16Ri | 0.00 | 0.00 | 0.00 | 1.00E+00 | no |
| 9430041J12Ri | 0.00 | 0.00 | 0.00 | 1.00E+00 | no |
| 9530002B09Ri | 0.00 | 0.00 | 0.00 | 1.00E+00 | no |
| 9530008L14Ri | 0.00 | 0.00 | 0.00 | 1.00E+00 | no |
| 9530026P05Ri | 0.00 | 0.00 | 0.00 | 1.00E+00 | no |
| 9530036O11Ri | 0.00 | 0.00 | 0.00 | 1.00E+00 | no |
| 9530059O14Ri | 0.00 | 0.00 | 0.00 | 1.00E+00 | no |
| 9530091C08Ri | 0.00 | 0.00 | 0.00 | 1.00E+00 | no |
| 9630013A20Ri | 0.00 | 0.00 | 0.00 | 1.00E+00 | no |
| 9630028H03Ri | 0.00 | 0.00 | 0.00 | 1.00E+00 | no |
| 9830107B12Ri | 0.00 | 0.00 | 0.00 | 1.00E+00 | no |
| 9930023K05Ri | 0.00 | 0.00 | 0.00 | 1.00E+00 | no |
| 9930032O22Ri | 0.00 | 0.00 | 0.00 | 1.00E+00 | no |
| A1cf         | 0.00 | 0.00 | 0.00 | 1.00E+00 | no |
| A230057D06R  | 0.00 | 0.00 | 0.00 | 1.00E+00 | no |
| A230065H16R  | 0.00 | 0.00 | 0.00 | 1.00E+00 | no |
| A2m          | 0.00 | 0.00 | 0.00 | 1.00E+00 | no |
| A330049M08F  | 0.00 | 0.00 | 0.00 | 1.00E+00 | no |
| A330050F15Ri | 0.00 | 0.00 | 0.00 | 1.00E+00 | no |
| A330076H08R  | 0.00 | 0.00 | 0.00 | 1.00E+00 | no |
| A430089I19Ri | 0.00 | 0.00 | 0.00 | 1.00E+00 | no |
| A4galt       | 0.00 | 0.00 | 0.00 | 1.00E+00 | no |
| A4gnt        | 0.00 | 0.00 | 0.00 | 1.00E+00 | no |
| A530013C23Ri | 0.00 | 0.00 | 0.00 | 1.00E+00 | no |

|              |      |      |      |          |    |
|--------------|------|------|------|----------|----|
| A530016L24Ri | 0.00 | 0.00 | 0.00 | 1.00E+00 | no |
| A530053G22R  | 0.00 | 0.00 | 0.00 | 1.00E+00 | no |
| A530058N18R  | 0.00 | 0.00 | 0.00 | 1.00E+00 | no |
| A630010A05Ri | 0.00 | 0.00 | 0.00 | 1.00E+00 | no |
| A630073D07R  | 0.00 | 0.00 | 0.00 | 1.00E+00 | no |
| A630075F10Ri | 0.00 | 0.00 | 0.00 | 1.00E+00 | no |
| A630095E13Ri | 0.00 | 0.00 | 0.00 | 1.00E+00 | no |
| A730017C20Ri | 0.00 | 0.00 | 0.00 | 1.00E+00 | no |
| A730018C14Ri | 0.00 | 0.00 | 0.00 | 1.00E+00 | no |
| A730020M07F  | 0.00 | 0.00 | 0.00 | 1.00E+00 | no |
| A730069N07R  | 0.00 | 0.00 | 0.00 | 1.00E+00 | no |
| A830018L16Ri | 0.00 | 0.00 | 0.00 | 1.00E+00 | no |
| A930011G23R  | 0.00 | 0.00 | 0.00 | 1.00E+00 | no |
| A930012L18Ri | 0.00 | 0.00 | 0.00 | 1.00E+00 | no |
| A930018P22Ri | 0.00 | 0.00 | 0.00 | 1.00E+00 | no |
| AA387883     | 0.00 | 0.00 | 0.00 | 1.00E+00 | no |
| AA545190     | 0.00 | 0.00 | 0.00 | 1.00E+00 | no |
| AA792892     | 0.00 | 0.00 | 0.00 | 1.00E+00 | no |
| AB056442     | 0.00 | 0.00 | 0.00 | 1.00E+00 | no |
| AB099516     | 0.00 | 0.00 | 0.00 | 1.00E+00 | no |
| AF067063     | 0.00 | 0.00 | 0.00 | 1.00E+00 | no |
| AF357355     | 0.00 | 0.00 | 0.00 | 1.00E+00 | no |
| AF357359     | 0.00 | 0.00 | 0.00 | 1.00E+00 | no |
| AI118078     | 0.00 | 0.00 | 0.00 | 1.00E+00 | no |
| AI314831     | 0.00 | 0.00 | 0.00 | 1.00E+00 | no |
| AI427809     | 0.19 | 0.00 | 0.00 | 1.00E+00 | no |
| AI464131     | 0.00 | 0.00 | 0.00 | 1.00E+00 | no |
| AI593442     | 0.00 | 0.00 | 0.00 | 1.00E+00 | no |
| AI747448     | 0.00 | 0.00 | 0.00 | 1.00E+00 | no |
| AI836003     | 0.00 | 0.00 | 0.00 | 1.00E+00 | no |
| AU015836     | 0.00 | 0.00 | 0.00 | 1.00E+00 | no |
| AU018091     | 0.00 | 0.00 | 0.00 | 1.00E+00 | no |
| AU019990     | 0.00 | 0.00 | 0.00 | 1.00E+00 | no |
| AU021034     | 0.00 | 0.00 | 0.00 | 1.00E+00 | no |
| AU022751     | 0.00 | 0.00 | 0.00 | 1.00E+00 | no |
| AU023871     | 0.00 | 0.00 | 0.00 | 1.00E+00 | no |
| AW551984     | 0.00 | 0.00 | 0.00 | 1.00E+00 | no |
| AY026312     | 0.00 | 0.00 | 0.00 | 1.00E+00 | no |
| AY512915     | 0.00 | 0.00 | 0.00 | 1.00E+00 | no |
| AY512931     | 0.00 | 0.00 | 0.00 | 1.00E+00 | no |
| AY761184     | 0.00 | 0.00 | 0.00 | 1.00E+00 | no |
| AY761185     | 0.00 | 0.00 | 0.00 | 1.00E+00 | no |

|         |       |       |      |          |    |
|---------|-------|-------|------|----------|----|
| Aadac   | 0.00  | 0.00  | 0.00 | 1.00E+00 | no |
| Aadacl2 | 0.00  | 0.00  | 0.00 | 1.00E+00 | no |
| Aadacl3 | 0.00  | 0.00  | 0.00 | 1.00E+00 | no |
| Aadat   | 0.00  | 0.00  | 0.00 | 1.00E+00 | no |
| Aass    | 0.00  | 0.00  | 0.00 | 1.00E+00 | no |
| Aatk    | 0.10  | 0.00  | 0.00 | 1.00E+00 | no |
| Abat    | 0.14  | 0.00  | 0.00 | 1.00E+00 | no |
| Abca12  | 0.00  | 0.00  | 0.00 | 1.00E+00 | no |
| Abca14  | 0.00  | 0.00  | 0.00 | 1.00E+00 | no |
| Abca15  | 0.00  | 0.00  | 0.00 | 1.00E+00 | no |
| Abca16  | 0.00  | 0.00  | 0.00 | 1.00E+00 | no |
| Abca8a  | 0.00  | 0.00  | 0.00 | 1.00E+00 | no |
| Abca8b  | 0.00  | 0.00  | 0.00 | 1.00E+00 | no |
| Abcb5   | 0.00  | 0.00  | 0.00 | 1.00E+00 | no |
| Abcc12  | 0.00  | 0.00  | 0.00 | 1.00E+00 | no |
| Abcc8   | 0.00  | 0.00  | 0.00 | 1.00E+00 | no |
| Abcc9   | 0.00  | 0.00  | 0.00 | 1.00E+00 | no |
| Abcg8   | 0.00  | 0.00  | 0.00 | 1.00E+00 | no |
| Abhd12b | 0.00  | 0.00  | 0.00 | 1.00E+00 | no |
| Abhd3   | 0.00  | 0.00  | 0.00 | 1.00E+00 | no |
| Ablim2  | 0.00  | 0.00  | 0.00 | 1.00E+00 | no |
| Ablim3  | 0.00  | 0.00  | 0.00 | 1.00E+00 | no |
| Abo     | 0.00  | 0.00  | 0.00 | 1.00E+00 | no |
| Abp1    | 0.00  | 0.00  | 0.00 | 1.00E+00 | no |
| Abpb    | 0.00  | 0.00  | 0.00 | 1.00E+00 | no |
| Abpd    | 0.00  | 0.00  | 0.00 | 1.00E+00 | no |
| Abpe    | 0.00  | 0.00  | 0.00 | 1.00E+00 | no |
| Abpg    | 0.00  | 0.00  | 0.00 | 1.00E+00 | no |
| Abpz    | 0.00  | 0.00  | 0.00 | 1.00E+00 | no |
| Acan    | 0.00  | 0.00  | 0.00 | 1.00E+00 | no |
| Accn1   | 0.00  | 0.00  | 0.00 | 1.00E+00 | no |
| Accn4   | 0.00  | 0.00  | 0.00 | 1.00E+00 | no |
| Accsl   | 0.00  | 0.00  | 0.00 | 1.00E+00 | no |
| Ace2    | 0.00  | 0.00  | 0.00 | 1.00E+00 | no |
| Acer1   | 0.00  | 0.00  | 0.00 | 1.00E+00 | no |
| Acin1   | 90.14 | 79.12 | 0.00 | 1.00E+00 | no |
| Acnat2  | 0.00  | 0.00  | 0.00 | 1.00E+00 | no |
| Acox2   | 0.00  | 0.00  | 0.00 | 1.00E+00 | no |
| Acr     | 0.00  | 0.00  | 0.00 | 1.00E+00 | no |
| Acrv1   | 0.00  | 0.00  | 0.00 | 1.00E+00 | no |
| Acsl6   | 0.00  | 0.00  | 0.00 | 1.00E+00 | no |
| Acsm1   | 0.00  | 0.00  | 0.00 | 1.00E+00 | no |

|           |      |      |      |          |    |
|-----------|------|------|------|----------|----|
| Acsm2     | 0.00 | 0.00 | 0.00 | 1.00E+00 | no |
| Acsm5     | 0.00 | 0.00 | 0.00 | 1.00E+00 | no |
| Acss3     | 0.00 | 0.00 | 0.00 | 1.00E+00 | no |
| Actbl2    | 0.00 | 0.00 | 0.00 | 1.00E+00 | no |
| Actc1     | 0.00 | 0.00 | 0.00 | 1.00E+00 | no |
| Actg2     | 0.00 | 0.00 | 0.00 | 1.00E+00 | no |
| Actl6b    | 0.00 | 0.00 | 0.00 | 1.00E+00 | no |
| Actl7b    | 0.00 | 0.00 | 0.00 | 1.00E+00 | no |
| Actrt1    | 0.00 | 0.00 | 0.00 | 1.00E+00 | no |
| Actrt2    | 0.00 | 0.00 | 0.00 | 1.00E+00 | no |
| Acvr1c    | 0.00 | 0.00 | 0.00 | 1.00E+00 | no |
| Adad2     | 0.00 | 0.00 | 0.00 | 1.00E+00 | no |
| Adam18    | 0.00 | 0.00 | 0.00 | 1.00E+00 | no |
| Adam2     | 0.00 | 0.00 | 0.00 | 1.00E+00 | no |
| Adam23    | 0.00 | 0.00 | 0.00 | 1.00E+00 | no |
| Adam24    | 0.00 | 0.00 | 0.00 | 1.00E+00 | no |
| Adam25    | 0.00 | 0.00 | 0.00 | 1.00E+00 | no |
| Adam26a   | 0.00 | 0.00 | 0.00 | 1.00E+00 | no |
| Adam26b   | 0.00 | 0.00 | 0.00 | 1.00E+00 | no |
| Adam28    | 0.00 | 0.00 | 0.00 | 1.00E+00 | no |
| Adam29    | 0.00 | 0.00 | 0.00 | 1.00E+00 | no |
| Adam33    | 0.00 | 0.00 | 0.00 | 1.00E+00 | no |
| Adam34    | 0.00 | 0.00 | 0.00 | 1.00E+00 | no |
| Adam39    | 0.00 | 0.00 | 0.00 | 1.00E+00 | no |
| Adam5     | 0.00 | 0.00 | 0.00 | 1.00E+00 | no |
| Adam7     | 0.00 | 0.00 | 0.00 | 1.00E+00 | no |
| Adamdec1  | 0.00 | 0.00 | 0.00 | 1.00E+00 | no |
| Adamts1   | 0.00 | 0.00 | 0.00 | 1.00E+00 | no |
| Adamts16  | 0.00 | 0.00 | 0.00 | 1.00E+00 | no |
| Adamts18  | 0.00 | 0.00 | 0.00 | 1.00E+00 | no |
| Adamts19  | 0.00 | 0.00 | 0.00 | 1.00E+00 | no |
| Adamts2   | 0.00 | 0.00 | 0.00 | 1.00E+00 | no |
| Adamts9   | 0.00 | 0.00 | 0.00 | 1.00E+00 | no |
| Adamtsl1  | 0.00 | 0.00 | 0.00 | 1.00E+00 | no |
| Adarb1    | 0.92 | 0.00 | 0.00 | 1.00E+00 | no |
| Adarb2    | 0.00 | 0.00 | 0.00 | 1.00E+00 | no |
| Adcy2     | 0.00 | 0.00 | 0.00 | 1.00E+00 | no |
| Adcy8     | 0.00 | 0.00 | 0.00 | 1.00E+00 | no |
| Adcyap1   | 0.00 | 0.00 | 0.00 | 1.00E+00 | no |
| Adcyap1r1 | 0.00 | 0.00 | 0.00 | 1.00E+00 | no |
| Adh4      | 0.00 | 0.00 | 0.00 | 1.00E+00 | no |
| Adh6-ps1  | 0.00 | 0.00 | 0.00 | 1.00E+00 | no |

|         |      |      |      |          |    |
|---------|------|------|------|----------|----|
| Adh6a   | 0.00 | 0.00 | 0.00 | 1.00E+00 | no |
| Adh7    | 0.00 | 0.00 | 0.00 | 1.00E+00 | no |
| Adhfe1  | 0.00 | 0.00 | 0.00 | 1.00E+00 | no |
| Adig    | 0.00 | 0.00 | 0.00 | 1.00E+00 | no |
| Adm2    | 0.00 | 0.00 | 0.00 | 1.00E+00 | no |
| Adora1  | 0.00 | 0.00 | 0.00 | 1.00E+00 | no |
| Adra1d  | 0.00 | 0.00 | 0.00 | 1.00E+00 | no |
| Adra2a  | 0.00 | 0.00 | 0.00 | 1.00E+00 | no |
| Adrb1   | 0.00 | 0.00 | 0.00 | 1.00E+00 | no |
| Adrb3   | 0.00 | 0.00 | 0.00 | 1.00E+00 | no |
| Afap112 | 0.00 | 0.00 | 0.00 | 1.00E+00 | no |
| Aff2    | 0.00 | 0.00 | 0.00 | 1.00E+00 | no |
| Afm     | 0.00 | 0.00 | 0.00 | 1.00E+00 | no |
| Agbl4   | 0.00 | 0.00 | 0.00 | 1.00E+00 | no |
| Agmat   | 0.00 | 0.00 | 0.00 | 1.00E+00 | no |
| Agr2    | 0.00 | 0.00 | 0.00 | 1.00E+00 | no |
| Agr3    | 0.00 | 0.00 | 0.00 | 1.00E+00 | no |
| Agt     | 0.00 | 0.00 | 0.00 | 1.00E+00 | no |
| Agtr1b  | 0.00 | 0.00 | 0.00 | 1.00E+00 | no |
| Agtr2   | 0.00 | 0.00 | 0.00 | 1.00E+00 | no |
| Agxt    | 0.00 | 0.00 | 0.00 | 1.00E+00 | no |
| Agxt2l1 | 0.00 | 0.00 | 0.00 | 1.00E+00 | no |
| Ahsg    | 0.00 | 0.00 | 0.00 | 1.00E+00 | no |
| Aida    | 0.00 | 0.00 | 0.00 | 1.00E+00 | no |
| Ajap1   | 0.00 | 0.00 | 0.00 | 1.00E+00 | no |
| Ak4     | 0.00 | 0.00 | 0.00 | 1.00E+00 | no |
| Akap4   | 0.00 | 0.00 | 0.00 | 1.00E+00 | no |
| Aknad1  | 0.00 | 0.00 | 0.00 | 1.00E+00 | no |
| Akp3    | 0.00 | 0.00 | 0.00 | 1.00E+00 | no |
| Akr1c14 | 0.00 | 0.00 | 0.00 | 1.00E+00 | no |
| Akr1c18 | 0.00 | 0.00 | 0.00 | 1.00E+00 | no |
| Akr1c19 | 0.00 | 0.00 | 0.00 | 1.00E+00 | no |
| Akr1c20 | 0.00 | 0.00 | 0.00 | 1.00E+00 | no |
| Akr1c21 | 0.00 | 0.00 | 0.00 | 1.00E+00 | no |
| Akr1c6  | 0.00 | 0.00 | 0.00 | 1.00E+00 | no |
| Akr1d1  | 0.00 | 0.00 | 0.00 | 1.00E+00 | no |
| Alas2   | 0.00 | 0.00 | 0.00 | 1.00E+00 | no |
| Alb     | 0.00 | 0.00 | 0.00 | 1.00E+00 | no |
| Aldh3a1 | 0.00 | 0.00 | 0.00 | 1.00E+00 | no |
| Allc    | 0.00 | 0.00 | 0.00 | 1.00E+00 | no |
| Alox12b | 0.00 | 0.00 | 0.00 | 1.00E+00 | no |
| Alox12e | 0.00 | 0.00 | 0.00 | 1.00E+00 | no |

|             |       |       |      |          |    |
|-------------|-------|-------|------|----------|----|
| Alpi        | 0.00  | 0.00  | 0.00 | 1.00E+00 | no |
| Alppl2      | 0.00  | 0.00  | 0.00 | 1.00E+00 | no |
| Als2cl      | 0.00  | 6.45  | 0.00 | 1.00E+00 | no |
| Als2cr11    | 0.00  | 0.00  | 0.00 | 1.00E+00 | no |
| Alx1        | 0.00  | 0.00  | 0.00 | 1.00E+00 | no |
| Alx3        | 0.00  | 0.00  | 0.00 | 1.00E+00 | no |
| Alx4        | 0.00  | 0.00  | 0.00 | 1.00E+00 | no |
| Ambn        | 0.00  | 0.00  | 0.00 | 1.00E+00 | no |
| Amd1,Amd2   | 27.31 | 20.71 | 0.00 | 1.00E+00 | no |
| Amd2        | 0.32  | 0.24  | 0.00 | 1.00E+00 | no |
| Amelx       | 0.00  | 0.00  | 0.00 | 1.00E+00 | no |
| Amph        | 0.00  | 0.00  | 0.00 | 1.00E+00 | no |
| Amtn        | 0.00  | 0.00  | 0.00 | 1.00E+00 | no |
| Amy2a2,Amy2 | 0.00  | 0.00  | 0.00 | 1.00E+00 | no |
| Amy2a3,Amy2 | 0.00  | 0.00  | 0.00 | 1.00E+00 | no |
| Amy2a4,Amy2 | 0.00  | 0.00  | 0.00 | 1.00E+00 | no |
| Amy2a5      | 0.00  | 0.00  | 0.00 | 1.00E+00 | no |
| Amy2b       | 0.00  | 0.00  | 0.00 | 1.00E+00 | no |
| Ang2        | 0.00  | 0.00  | 0.00 | 1.00E+00 | no |
| Ang3,Ang5   | 0.00  | 0.00  | 0.00 | 1.00E+00 | no |
| Ang4        | 0.00  | 0.00  | 0.00 | 1.00E+00 | no |
| Ang5        | 0.00  | 0.00  | 0.00 | 1.00E+00 | no |
| Ang6        | 0.00  | 0.00  | 0.00 | 1.00E+00 | no |
| Ank1        | 0.19  | 0.00  | 0.00 | 1.00E+00 | no |
| Ank3        | 0.00  | 0.00  | 0.00 | 1.00E+00 | no |
| Ankfn1      | 0.00  | 0.00  | 0.00 | 1.00E+00 | no |
| Ankk1       | 0.00  | 0.00  | 0.00 | 1.00E+00 | no |
| Ankrd1      | 0.00  | 0.00  | 0.00 | 1.00E+00 | no |
| Ankrd2      | 0.00  | 0.00  | 0.00 | 1.00E+00 | no |
| Ankrd33     | 0.00  | 0.00  | 0.00 | 1.00E+00 | no |
| Ankrd33b    | 12.58 | 20.71 | 0.00 | 1.00E+00 | no |
| Ankrd34c    | 0.00  | 0.00  | 0.00 | 1.00E+00 | no |
| Ankrd36     | 0.00  | 0.00  | 0.00 | 1.00E+00 | no |
| Ankrd55     | 0.00  | 0.00  | 0.00 | 1.00E+00 | no |
| Ankrd58     | 0.00  | 0.00  | 0.00 | 1.00E+00 | no |
| Ankrd7      | 0.00  | 0.00  | 0.00 | 1.00E+00 | no |
| Anks1b      | 0.00  | 0.00  | 0.00 | 1.00E+00 | no |
| Anks4b      | 0.00  | 0.00  | 0.00 | 1.00E+00 | no |
| Ano2        | 0.00  | 0.00  | 0.00 | 1.00E+00 | no |
| Ano3        | 0.00  | 0.00  | 0.00 | 1.00E+00 | no |
| Antxrl      | 0.00  | 0.00  | 0.00 | 1.00E+00 | no |
| Anxa10      | 0.00  | 0.00  | 0.00 | 1.00E+00 | no |

|          |       |       |      |          |    |
|----------|-------|-------|------|----------|----|
| Anxa13   | 0.00  | 0.00  | 0.00 | 1.00E+00 | no |
| Anxa8    | 0.00  | 0.00  | 0.00 | 1.00E+00 | no |
| Aox3     | 0.00  | 0.00  | 0.00 | 1.00E+00 | no |
| Apba2    | 0.00  | 0.00  | 0.00 | 1.00E+00 | no |
| Apbh     | 0.00  | 0.00  | 0.00 | 1.00E+00 | no |
| Apcs     | 0.00  | 0.00  | 0.00 | 1.00E+00 | no |
| Apeg3    | 0.00  | 0.00  | 0.00 | 1.00E+00 | no |
| Apoa1    | 0.00  | 0.00  | 0.00 | 1.00E+00 | no |
| Apoa4    | 0.00  | 0.00  | 0.00 | 1.00E+00 | no |
| Apoa5    | 0.00  | 0.00  | 0.00 | 1.00E+00 | no |
| Apob     | 0.00  | 0.00  | 0.00 | 1.00E+00 | no |
| Apoc3    | 0.00  | 0.00  | 0.00 | 1.00E+00 | no |
| Apoc4    | 0.00  | 0.00  | 0.00 | 1.00E+00 | no |
| Apol11a  | 0.00  | 0.00  | 0.00 | 1.00E+00 | no |
| Apol6    | 0.00  | 0.00  | 0.00 | 1.00E+00 | no |
| Apol7a   | 0.00  | 0.00  | 0.00 | 1.00E+00 | no |
| Apol9b   | 0.00  | 0.00  | 0.00 | 1.00E+00 | no |
| Aqp12    | 0.00  | 0.00  | 0.00 | 1.00E+00 | no |
| Aqp2     | 0.00  | 0.00  | 0.00 | 1.00E+00 | no |
| Aqp5     | 0.00  | 0.00  | 0.00 | 1.00E+00 | no |
| Aqp6     | 0.00  | 0.00  | 0.00 | 1.00E+00 | no |
| Aqp8     | 0.00  | 0.00  | 0.00 | 1.00E+00 | no |
| Areg     | 0.00  | 0.00  | 0.00 | 1.00E+00 | no |
| Arfgap1  | 21.99 | 21.75 | 0.00 | 1.00E+00 | no |
| Arhgap17 | 47.82 | 42.64 | 0.00 | 1.00E+00 | no |
| Arhgap36 | 0.00  | 0.00  | 0.00 | 1.00E+00 | no |
| Arhgap40 | 0.00  | 0.00  | 0.00 | 1.00E+00 | no |
| Arhgap8  | 0.00  | 0.00  | 0.00 | 1.00E+00 | no |
| Arhgef16 | 0.00  | 0.00  | 0.00 | 1.00E+00 | no |
| Arhgef2  | 36.94 | 39.99 | 0.00 | 1.00E+00 | no |
| Arhgef25 | 0.00  | 0.00  | 0.00 | 1.00E+00 | no |
| Arhgef38 | 0.00  | 0.00  | 0.00 | 1.00E+00 | no |
| Arhgef40 | 0.00  | 0.00  | 0.00 | 1.00E+00 | no |
| Arid3c   | 0.00  | 0.00  | 0.00 | 1.00E+00 | no |
| Arl14    | 0.00  | 0.00  | 0.00 | 1.00E+00 | no |
| Armc4    | 0.00  | 0.00  | 0.00 | 1.00E+00 | no |
| Arpm1    | 0.00  | 0.00  | 0.00 | 1.00E+00 | no |
| Arr3     | 0.00  | 0.00  | 0.00 | 1.00E+00 | no |
| Arsj     | 0.00  | 0.00  | 0.00 | 1.00E+00 | no |
| Art2a-ps | 0.00  | 0.00  | 0.00 | 1.00E+00 | no |
| Arx      | 0.00  | 0.00  | 0.00 | 1.00E+00 | no |
| Asb11    | 0.00  | 0.00  | 0.00 | 1.00E+00 | no |



|               |      |       |      |          |    |
|---------------|------|-------|------|----------|----|
| Asb12         | 0.00 | 0.00  | 0.00 | 1.00E+00 | no |
| Asb13         | 8.65 | 13.21 | 0.00 | 1.00E+00 | no |
| Asb16         | 0.00 | 0.00  | 0.00 | 1.00E+00 | no |
| Asb18         | 0.00 | 0.00  | 0.00 | 1.00E+00 | no |
| Asb9          | 0.00 | 0.00  | 0.00 | 1.00E+00 | no |
| Ascl1         | 0.00 | 0.00  | 0.00 | 1.00E+00 | no |
| Asgr1         | 0.00 | 0.00  | 0.00 | 1.00E+00 | no |
| Asgr2         | 0.00 | 0.00  | 0.00 | 1.00E+00 | no |
| Aspdh         | 0.00 | 0.00  | 0.00 | 1.00E+00 | no |
| Aspg          | 0.00 | 0.00  | 0.00 | 1.00E+00 | no |
| Astn2         | 0.00 | 0.00  | 0.00 | 1.00E+00 | no |
| Asxl3         | 0.00 | 0.00  | 0.00 | 1.00E+00 | no |
| Asz1          | 0.00 | 0.00  | 0.00 | 1.00E+00 | no |
| Atp12a        | 0.00 | 0.00  | 0.00 | 1.00E+00 | no |
| Atp13a4       | 0.00 | 0.00  | 0.00 | 1.00E+00 | no |
| Atp13a5       | 0.00 | 0.00  | 0.00 | 1.00E+00 | no |
| Atp1a2        | 0.00 | 0.00  | 0.00 | 1.00E+00 | no |
| Atp1b4        | 0.00 | 0.00  | 0.00 | 1.00E+00 | no |
| Atp2b2        | 0.00 | 0.00  | 0.00 | 1.00E+00 | no |
| Atp2b3        | 0.00 | 0.00  | 0.00 | 1.00E+00 | no |
| Atp6v1g3      | 0.00 | 0.00  | 0.00 | 1.00E+00 | no |
| Atp8b5        | 0.00 | 0.00  | 0.00 | 1.00E+00 | no |
| Aurkc         | 0.00 | 0.00  | 0.00 | 1.00E+00 | no |
| Avp           | 0.00 | 0.00  | 0.00 | 1.00E+00 | no |
| Awat1         | 0.00 | 0.00  | 0.00 | 1.00E+00 | no |
| Aym1          | 0.00 | 0.00  | 0.00 | 1.00E+00 | no |
| Azgp1         | 0.00 | 0.00  | 0.00 | 1.00E+00 | no |
| B020004J07Ril | 0.00 | 0.00  | 0.00 | 1.00E+00 | no |
| B020031M17R   | 0.00 | 0.00  | 0.00 | 1.00E+00 | no |
| B3galt1       | 0.00 | 0.00  | 0.00 | 1.00E+00 | no |
| B3galt5       | 0.00 | 0.00  | 0.00 | 1.00E+00 | no |
| B3gat1        | 0.00 | 0.00  | 0.00 | 1.00E+00 | no |
| B430010I23Ril | 0.00 | 0.00  | 0.00 | 1.00E+00 | no |
| B4galnt3      | 0.00 | 0.00  | 0.00 | 1.00E+00 | no |
| B830017H08Ril | 0.00 | 0.00  | 0.00 | 1.00E+00 | no |
| BB014433      | 0.00 | 0.00  | 0.00 | 1.00E+00 | no |
| BB019430      | 0.00 | 0.00  | 0.00 | 1.00E+00 | no |
| BB031773      | 0.00 | 0.00  | 0.00 | 1.00E+00 | no |
| BB123696      | 0.00 | 0.00  | 0.00 | 1.00E+00 | no |
| BB287469      | 0.00 | 0.00  | 0.00 | 1.00E+00 | no |
| BC006965      | 0.00 | 0.00  | 0.00 | 1.00E+00 | no |
| BC014805      | 0.00 | 0.00  | 0.00 | 1.00E+00 | no |

|              |      |      |      |          |    |
|--------------|------|------|------|----------|----|
| BC018473     | 0.00 | 0.00 | 0.00 | 1.00E+00 | no |
| BC021891     | 0.00 | 0.00 | 0.00 | 1.00E+00 | no |
| BC024139     | 0.00 | 0.00 | 0.00 | 1.00E+00 | no |
| BC024386     | 0.00 | 0.00 | 0.00 | 1.00E+00 | no |
| BC026439     | 0.00 | 0.00 | 0.00 | 1.00E+00 | no |
| BC027072     | 0.00 | 0.00 | 0.00 | 1.00E+00 | no |
| BC030500     | 0.00 | 0.00 | 0.00 | 1.00E+00 | no |
| BC030870     | 0.00 | 0.00 | 0.00 | 1.00E+00 | no |
| BC037703     | 0.00 | 0.00 | 0.00 | 1.00E+00 | no |
| BC048502     | 0.00 | 0.00 | 0.00 | 1.00E+00 | no |
| BC048599     | 0.00 | 0.00 | 0.00 | 1.00E+00 | no |
| BC048679     | 0.00 | 0.00 | 0.00 | 1.00E+00 | no |
| BC051070     | 0.00 | 0.00 | 0.00 | 1.00E+00 | no |
| BC051665     | 0.00 | 0.00 | 0.00 | 1.00E+00 | no |
| BC053393     | 0.00 | 0.00 | 0.00 | 1.00E+00 | no |
| BC061212     | 0.00 | 0.00 | 0.00 | 1.00E+00 | no |
| BC061237     | 0.00 | 0.00 | 0.00 | 1.00E+00 | no |
| BC066135     | 0.00 | 0.00 | 0.00 | 1.00E+00 | no |
| BC080695     | 0.00 | 0.00 | 0.00 | 1.00E+00 | no |
| BC085271     | 0.00 | 0.00 | 0.00 | 1.00E+00 | no |
| BC089491     | 0.00 | 0.00 | 0.00 | 1.00E+00 | no |
| BC089597     | 0.00 | 0.00 | 0.00 | 1.00E+00 | no |
| BC090627,Chk | 1.24 | 0.00 | 0.00 | 1.00E+00 | no |
| BC096441     | 0.00 | 0.00 | 0.00 | 1.00E+00 | no |
| BC117090     | 0.00 | 0.00 | 0.00 | 1.00E+00 | no |
| BC147527     | 0.00 | 0.00 | 0.00 | 1.00E+00 | no |
| Baalc        | 0.00 | 0.00 | 0.00 | 1.00E+00 | no |
| Baat         | 0.00 | 0.00 | 0.00 | 1.00E+00 | no |
| Bace2        | 0.00 | 0.00 | 0.00 | 1.00E+00 | no |
| Bai1         | 0.00 | 0.00 | 0.00 | 1.00E+00 | no |
| Bai2         | 0.00 | 0.00 | 0.00 | 1.00E+00 | no |
| Bai3         | 0.00 | 0.00 | 0.00 | 1.00E+00 | no |
| Barhl2       | 0.00 | 0.00 | 0.00 | 1.00E+00 | no |
| Barx1        | 0.00 | 0.00 | 0.00 | 1.00E+00 | no |
| Barx2        | 0.00 | 0.00 | 0.00 | 1.00E+00 | no |
| Batf3        | 0.00 | 0.00 | 0.00 | 1.00E+00 | no |
| Bbox1        | 0.00 | 0.00 | 0.00 | 1.00E+00 | no |
| Bc1          | 0.00 | 0.00 | 0.00 | 1.00E+00 | no |
| Bcan         | 0.00 | 0.00 | 0.00 | 1.00E+00 | no |
| Bcar1        | 0.00 | 0.00 | 0.00 | 1.00E+00 | no |
| Bche         | 0.00 | 0.00 | 0.00 | 1.00E+00 | no |
| Bcl11b       | 0.00 | 0.00 | 0.00 | 1.00E+00 | no |

|               |       |       |      |          |    |
|---------------|-------|-------|------|----------|----|
| Bcl2a1c       | 0.00  | 0.00  | 0.00 | 1.00E+00 | no |
| Bcl2l10       | 0.00  | 0.00  | 0.00 | 1.00E+00 | no |
| Bcmo1         | 0.00  | 0.00  | 0.00 | 1.00E+00 | no |
| Bcor          | 34.73 | 26.49 | 0.00 | 1.00E+00 | no |
| Bdh2          | 0.00  | 0.00  | 0.00 | 1.00E+00 | no |
| Bdnf          | 0.00  | 0.00  | 0.00 | 1.00E+00 | no |
| Bean1         | 0.00  | 0.00  | 0.00 | 1.00E+00 | no |
| Bend7         | 0.00  | 0.00  | 0.00 | 1.00E+00 | no |
| Best2         | 0.00  | 0.00  | 0.00 | 1.00E+00 | no |
| Bet3l         | 0.00  | 0.00  | 0.00 | 1.00E+00 | no |
| Bhlha9        | 0.00  | 0.00  | 0.00 | 1.00E+00 | no |
| Bhlhe22       | 0.00  | 0.00  | 0.00 | 1.00E+00 | no |
| Bhlhe23       | 0.00  | 0.00  | 0.00 | 1.00E+00 | no |
| Bhmt          | 0.00  | 0.00  | 0.00 | 1.00E+00 | no |
| Bhmt2         | 0.00  | 0.00  | 0.00 | 1.00E+00 | no |
| Bicc1         | 0.00  | 0.00  | 0.00 | 1.00E+00 | no |
| Birc7         | 0.00  | 0.00  | 0.00 | 1.00E+00 | no |
| Bmp10         | 0.00  | 0.00  | 0.00 | 1.00E+00 | no |
| Bmp15         | 0.00  | 0.00  | 0.00 | 1.00E+00 | no |
| Bmp3          | 0.00  | 0.00  | 0.00 | 1.00E+00 | no |
| Bmp5          | 0.00  | 0.00  | 0.00 | 1.00E+00 | no |
| Bmp8b         | 0.00  | 0.00  | 0.00 | 1.00E+00 | no |
| Bmper         | 0.00  | 0.00  | 0.00 | 1.00E+00 | no |
| Bmpr1a        | 0.00  | 0.00  | 0.00 | 1.00E+00 | no |
| Bmpr1b        | 0.00  | 0.00  | 0.00 | 1.00E+00 | no |
| Bnc1          | 0.00  | 0.00  | 0.00 | 1.00E+00 | no |
| Bnc2          | 0.00  | 0.00  | 0.00 | 1.00E+00 | no |
| Brox          | 0.00  | 0.00  | 0.00 | 1.00E+00 | no |
| Brs3          | 0.00  | 0.00  | 0.00 | 1.00E+00 | no |
| Bsph1         | 0.00  | 0.00  | 0.00 | 1.00E+00 | no |
| Bsx           | 0.00  | 0.00  | 0.00 | 1.00E+00 | no |
| Btg3          | 0.00  | 0.00  | 0.00 | 1.00E+00 | no |
| Btg4          | 0.00  | 0.00  | 0.00 | 1.00E+00 | no |
| Btnl5         | 0.00  | 0.00  | 0.00 | 1.00E+00 | no |
| Btnl6         | 0.00  | 0.00  | 0.00 | 1.00E+00 | no |
| C030002c11rik | 0.00  | 0.00  | 0.00 | 1.00E+00 | no |
| C030023E24Ri  | 0.00  | 0.00  | 0.00 | 1.00E+00 | no |
| C130026L21Ri  | 0.00  | 0.00  | 0.00 | 1.00E+00 | no |
| C130071C03Ri  | 0.00  | 0.00  | 0.00 | 1.00E+00 | no |
| C130074G19Ri  | 0.00  | 0.00  | 0.00 | 1.00E+00 | no |
| C130079G13Ri  | 0.00  | 0.00  | 0.00 | 1.00E+00 | no |
| C130080G10Ri  | 0.00  | 0.00  | 0.00 | 1.00E+00 | no |

|              |      |      |      |          |    |
|--------------|------|------|------|----------|----|
| C1ql2        | 0.00 | 0.00 | 0.00 | 1.00E+00 | no |
| C1qtnf2      | 0.00 | 0.00 | 0.00 | 1.00E+00 | no |
| C1qtnf7      | 0.00 | 0.00 | 0.00 | 1.00E+00 | no |
| C1s          | 0.00 | 0.00 | 0.00 | 1.00E+00 | no |
| C230004F18Ri | 0.00 | 0.00 | 0.00 | 1.00E+00 | no |
| C2cd4a       | 0.00 | 0.00 | 0.00 | 1.00E+00 | no |
| C2cd4b       | 0.00 | 0.00 | 0.00 | 1.00E+00 | no |
| C2cd4c       | 0.00 | 0.00 | 0.00 | 1.00E+00 | no |
| C330005M16R  | 0.00 | 0.00 | 0.00 | 1.00E+00 | no |
| C330024D21Ri | 0.00 | 0.00 | 0.00 | 1.00E+00 | no |
| C4bp         | 0.00 | 0.00 | 0.00 | 1.00E+00 | no |
| C530028O21R  | 0.00 | 0.00 | 0.00 | 1.00E+00 | no |
| C5ar1        | 0.00 | 0.00 | 0.00 | 1.00E+00 | no |
| C6           | 0.00 | 0.00 | 0.00 | 1.00E+00 | no |
| C730048C13Ri | 0.00 | 0.00 | 0.00 | 1.00E+00 | no |
| C77370       | 0.00 | 0.00 | 0.00 | 1.00E+00 | no |
| C86187       | 0.00 | 0.00 | 0.00 | 1.00E+00 | no |
| C87414       | 0.00 | 0.00 | 0.00 | 1.00E+00 | no |
| C87499       | 0.00 | 0.00 | 0.00 | 1.00E+00 | no |
| C87977       | 0.00 | 0.00 | 0.00 | 1.00E+00 | no |
| C8a          | 0.00 | 0.00 | 0.00 | 1.00E+00 | no |
| C8b          | 0.00 | 0.00 | 0.00 | 1.00E+00 | no |
| C9           | 0.00 | 0.00 | 0.00 | 1.00E+00 | no |
| CK137956     | 0.00 | 0.00 | 0.00 | 1.00E+00 | no |
| Cabp2        | 0.00 | 0.00 | 0.00 | 1.00E+00 | no |
| Cacna1g      | 0.00 | 0.00 | 0.00 | 1.00E+00 | no |
| Cacna1s      | 0.00 | 0.00 | 0.00 | 1.00E+00 | no |
| Cacna2d1     | 4.61 | 4.14 | 0.00 | 1.00E+00 | no |
| Cacna2d2     | 0.00 | 0.00 | 0.00 | 1.00E+00 | no |
| Cacna2d3     | 0.00 | 0.00 | 0.00 | 1.00E+00 | no |
| Cacng1       | 0.00 | 0.00 | 0.00 | 1.00E+00 | no |
| Cacng3       | 0.00 | 0.00 | 0.00 | 1.00E+00 | no |
| Cacng4       | 0.00 | 0.00 | 0.00 | 1.00E+00 | no |
| Cacng5       | 0.00 | 0.00 | 0.00 | 1.00E+00 | no |
| Cacng6       | 0.00 | 0.00 | 0.00 | 1.00E+00 | no |
| Cacng7       | 0.00 | 0.00 | 0.00 | 1.00E+00 | no |
| Cacng8       | 0.00 | 0.00 | 0.00 | 1.00E+00 | no |
| Cadm1        | 0.00 | 0.00 | 0.00 | 1.00E+00 | no |
| Cadm2        | 0.00 | 0.00 | 0.00 | 1.00E+00 | no |
| Cadps        | 0.00 | 0.00 | 0.00 | 1.00E+00 | no |
| Calb1        | 0.00 | 0.00 | 0.00 | 1.00E+00 | no |
| Calb2        | 0.00 | 0.00 | 0.00 | 1.00E+00 | no |

|          |       |       |      |          |    |
|----------|-------|-------|------|----------|----|
| Calca    | 0.00  | 0.00  | 0.00 | 1.00E+00 | no |
| Calcb    | 0.00  | 0.00  | 0.00 | 1.00E+00 | no |
| Calcoco2 | 0.00  | 0.00  | 0.00 | 1.00E+00 | no |
| Calcr    | 0.00  | 0.00  | 0.00 | 1.00E+00 | no |
| Calhm1   | 0.00  | 0.00  | 0.00 | 1.00E+00 | no |
| Calm4    | 0.00  | 0.00  | 0.00 | 1.00E+00 | no |
| Calm5    | 0.00  | 0.00  | 0.00 | 1.00E+00 | no |
| Calml3   | 0.00  | 0.00  | 0.00 | 1.00E+00 | no |
| Caln1    | 0.00  | 0.00  | 0.00 | 1.00E+00 | no |
| Calr4    | 0.00  | 0.00  | 0.00 | 1.00E+00 | no |
| Caly     | 0.00  | 0.00  | 0.00 | 1.00E+00 | no |
| Canx     | 77.11 | 72.93 | 0.00 | 1.00E+00 | no |
| Capn13   | 0.00  | 0.00  | 0.00 | 1.00E+00 | no |
| Capn6    | 0.00  | 0.00  | 0.00 | 1.00E+00 | no |
| Capn8    | 0.00  | 0.00  | 0.00 | 1.00E+00 | no |
| Capn9    | 0.00  | 0.00  | 0.00 | 1.00E+00 | no |
| Caps2    | 0.00  | 0.00  | 0.00 | 1.00E+00 | no |
| Capza3   | 0.00  | 0.00  | 0.00 | 1.00E+00 | no |
| Car10    | 0.00  | 0.00  | 0.00 | 1.00E+00 | no |
| Car6     | 0.00  | 0.00  | 0.00 | 1.00E+00 | no |
| Car8     | 0.00  | 0.00  | 0.00 | 1.00E+00 | no |
| Casp14   | 0.00  | 0.00  | 0.00 | 1.00E+00 | no |
| Casq2    | 0.00  | 0.00  | 0.00 | 1.00E+00 | no |
| Catsper1 | 0.00  | 0.00  | 0.00 | 1.00E+00 | no |
| Catsper4 | 0.00  | 0.00  | 0.00 | 1.00E+00 | no |
| Catsperb | 0.00  | 0.00  | 0.00 | 1.00E+00 | no |
| Cav1     | 0.00  | 0.00  | 0.00 | 1.00E+00 | no |
| Cav3     | 0.00  | 0.00  | 0.00 | 1.00E+00 | no |
| Cbln4    | 0.00  | 0.00  | 0.00 | 1.00E+00 | no |
| Ccdc105  | 0.00  | 0.00  | 0.00 | 1.00E+00 | no |
| Ccdc108  | 0.00  | 0.00  | 0.00 | 1.00E+00 | no |
| Ccdc113  | 0.00  | 0.00  | 0.00 | 1.00E+00 | no |
| Ccdc121  | 0.00  | 0.00  | 0.00 | 1.00E+00 | no |
| Ccdc129  | 0.00  | 0.00  | 0.00 | 1.00E+00 | no |
| Ccdc148  | 0.00  | 0.00  | 0.00 | 1.00E+00 | no |
| Ccdc151  | 0.00  | 0.00  | 0.00 | 1.00E+00 | no |
| Ccdc153  | 0.00  | 0.00  | 0.00 | 1.00E+00 | no |
| Ccdc159  | 0.00  | 0.00  | 0.00 | 1.00E+00 | no |
| Ccdc160  | 0.00  | 0.00  | 0.00 | 1.00E+00 | no |
| Ccdc24   | 0.00  | 0.00  | 0.00 | 1.00E+00 | no |
| Ccdc27   | 0.00  | 0.00  | 0.00 | 1.00E+00 | no |
| Ccdc3    | 0.00  | 0.00  | 0.00 | 1.00E+00 | no |

|              |      |      |      |          |    |
|--------------|------|------|------|----------|----|
| Ccdc54       | 0.00 | 0.00 | 0.00 | 1.00E+00 | no |
| Ccdc67       | 0.00 | 0.00 | 0.00 | 1.00E+00 | no |
| Ccdc68       | 0.00 | 0.00 | 0.00 | 1.00E+00 | no |
| Ccdc7        | 0.00 | 0.00 | 0.00 | 1.00E+00 | no |
| Ccdc70       | 0.00 | 0.00 | 0.00 | 1.00E+00 | no |
| Ccdc81       | 0.00 | 0.00 | 0.00 | 1.00E+00 | no |
| Ccdc82       | 0.00 | 0.00 | 0.00 | 1.00E+00 | no |
| Ccdc83       | 0.00 | 0.00 | 0.00 | 1.00E+00 | no |
| Ccdc87       | 0.00 | 0.00 | 0.00 | 1.00E+00 | no |
| Ccdc93       | 6.16 | 8.41 | 0.00 | 1.00E+00 | no |
| Cck          | 0.00 | 0.00 | 0.00 | 1.00E+00 | no |
| Cckar        | 0.00 | 0.00 | 0.00 | 1.00E+00 | no |
| Cckbr        | 0.00 | 0.00 | 0.00 | 1.00E+00 | no |
| Ccl1         | 0.00 | 0.00 | 0.00 | 1.00E+00 | no |
| Ccl11        | 0.00 | 0.00 | 0.00 | 1.00E+00 | no |
| Ccl12        | 0.00 | 0.00 | 0.00 | 1.00E+00 | no |
| Ccl19        | 0.00 | 0.00 | 0.00 | 1.00E+00 | no |
| Ccl2         | 0.00 | 0.00 | 0.00 | 1.00E+00 | no |
| Ccl20        | 0.00 | 0.00 | 0.00 | 1.00E+00 | no |
| Ccl21a,Gm198 | 0.00 | 0.00 | 0.00 | 1.00E+00 | no |
| Ccl21b,Gm133 | 0.00 | 0.00 | 0.00 | 1.00E+00 | no |
| Ccl21c       | 0.00 | 0.00 | 0.00 | 1.00E+00 | no |
| Ccl24        | 0.00 | 0.00 | 0.00 | 1.00E+00 | no |
| Ccl26        | 0.00 | 0.00 | 0.00 | 1.00E+00 | no |
| Ccl28        | 0.00 | 0.00 | 0.00 | 1.00E+00 | no |
| Ccl7         | 0.00 | 0.00 | 0.00 | 1.00E+00 | no |
| Ccl8         | 0.00 | 0.00 | 0.00 | 1.00E+00 | no |
| Ccna1        | 0.00 | 0.00 | 0.00 | 1.00E+00 | no |
| Ccnb1ip1     | 0.00 | 0.00 | 0.00 | 1.00E+00 | no |
| Ccnb3        | 0.00 | 0.00 | 0.00 | 1.00E+00 | no |
| Ccr11        | 0.00 | 0.00 | 0.00 | 1.00E+00 | no |
| Ccr8         | 0.00 | 0.00 | 0.00 | 1.00E+00 | no |
| Cd101        | 0.00 | 0.00 | 0.00 | 1.00E+00 | no |
| Cd109        | 0.00 | 0.00 | 0.00 | 1.00E+00 | no |
| Cd164l2      | 0.00 | 0.00 | 0.00 | 1.00E+00 | no |
| Cd200r3      | 0.00 | 0.00 | 0.00 | 1.00E+00 | no |
| Cd207        | 0.00 | 0.00 | 0.00 | 1.00E+00 | no |
| Cd226        | 0.00 | 0.00 | 0.00 | 1.00E+00 | no |
| Cd300e       | 0.00 | 0.00 | 0.00 | 1.00E+00 | no |
| Cd300lh      | 0.00 | 0.00 | 0.00 | 1.00E+00 | no |
| Cd3g         | 0.00 | 0.00 | 0.00 | 1.00E+00 | no |
| Cd40         | 2.23 | 0.00 | 0.00 | 1.00E+00 | no |

|            |       |       |      |          |    |
|------------|-------|-------|------|----------|----|
| Cd40lg     | 0.00  | 0.00  | 0.00 | 1.00E+00 | no |
| Cd6        | 0.00  | 0.00  | 0.00 | 1.00E+00 | no |
| Cd70       | 0.00  | 0.00  | 0.00 | 1.00E+00 | no |
| Cd8a       | 0.00  | 0.00  | 0.00 | 1.00E+00 | no |
| Cdc42ep1   | 0.00  | 0.00  | 0.00 | 1.00E+00 | no |
| Cdc42ep5   | 0.00  | 0.00  | 0.00 | 1.00E+00 | no |
| Cdh12      | 0.00  | 0.00  | 0.00 | 1.00E+00 | no |
| Cdh13      | 0.00  | 0.00  | 0.00 | 1.00E+00 | no |
| Cdh18      | 0.00  | 0.00  | 0.00 | 1.00E+00 | no |
| Cdh19      | 0.00  | 0.00  | 0.00 | 1.00E+00 | no |
| Cdh2       | 0.00  | 0.00  | 0.00 | 1.00E+00 | no |
| Cdh20      | 0.00  | 0.00  | 0.00 | 1.00E+00 | no |
| Cdh23      | 0.01  | 0.00  | 0.00 | 1.00E+00 | no |
| Cdh26      | 0.00  | 0.00  | 0.00 | 1.00E+00 | no |
| Cdh3       | 0.00  | 0.00  | 0.00 | 1.00E+00 | no |
| Cdh7       | 0.00  | 0.00  | 0.00 | 1.00E+00 | no |
| Cdh8       | 0.00  | 0.00  | 0.00 | 1.00E+00 | no |
| Cdh9       | 0.00  | 0.00  | 0.00 | 1.00E+00 | no |
| Cdhr2      | 0.00  | 0.00  | 0.00 | 1.00E+00 | no |
| Cdhr3      | 0.00  | 0.00  | 0.00 | 1.00E+00 | no |
| Cdk15      | 0.00  | 0.00  | 0.00 | 1.00E+00 | no |
| Cdr1       | 0.00  | 0.00  | 0.00 | 1.00E+00 | no |
| Cdrt4      | 0.00  | 0.00  | 0.00 | 1.00E+00 | no |
| Cdsn       | 0.00  | 0.00  | 0.00 | 1.00E+00 | no |
| Cdv3       | 81.54 | 62.31 | 0.00 | 1.00E+00 | no |
| Cdx1       | 0.00  | 0.00  | 0.00 | 1.00E+00 | no |
| Cdx2       | 0.00  | 0.00  | 0.00 | 1.00E+00 | no |
| Cdx4       | 0.00  | 0.00  | 0.00 | 1.00E+00 | no |
| Ceacam-ps1 | 0.00  | 0.00  | 0.00 | 1.00E+00 | no |
| Ceacam1    | 12.17 | 9.71  | 0.00 | 1.00E+00 | no |
| Ceacam11   | 0.00  | 0.00  | 0.00 | 1.00E+00 | no |
| Ceacam12   | 0.00  | 0.00  | 0.00 | 1.00E+00 | no |
| Ceacam13   | 0.00  | 0.00  | 0.00 | 1.00E+00 | no |
| Ceacam14   | 0.00  | 0.00  | 0.00 | 1.00E+00 | no |
| Ceacam15   | 0.00  | 0.00  | 0.00 | 1.00E+00 | no |
| Ceacam2    | 4.30  | 4.26  | 0.00 | 1.00E+00 | no |
| Ceacam20   | 0.00  | 0.00  | 0.00 | 1.00E+00 | no |
| Ceacam5    | 0.00  | 0.00  | 0.00 | 1.00E+00 | no |
| Cela2a     | 0.00  | 0.00  | 0.00 | 1.00E+00 | no |
| Cela3b     | 0.00  | 0.00  | 0.00 | 1.00E+00 | no |
| Celf4      | 0.00  | 0.00  | 0.00 | 1.00E+00 | no |
| Celf6      | 0.00  | 0.00  | 0.00 | 1.00E+00 | no |

|        |       |       |      |          |    |
|--------|-------|-------|------|----------|----|
| Cend1  | 0.00  | 0.00  | 0.00 | 1.00E+00 | no |
| Cep250 | 29.97 | 34.85 | 0.00 | 1.00E+00 | no |
| Cer1   | 0.00  | 0.00  | 0.00 | 1.00E+00 | no |
| Ces1a  | 0.00  | 0.00  | 0.00 | 1.00E+00 | no |
| Ces1b  | 0.00  | 0.00  | 0.00 | 1.00E+00 | no |
| Ces1c  | 0.00  | 0.00  | 0.00 | 1.00E+00 | no |
| Ces1d  | 0.00  | 0.00  | 0.00 | 1.00E+00 | no |
| Ces1e  | 0.00  | 0.00  | 0.00 | 1.00E+00 | no |
| Ces1f  | 0.00  | 0.00  | 0.00 | 1.00E+00 | no |
| Ces1g  | 0.00  | 0.00  | 0.00 | 1.00E+00 | no |
| Ces2a  | 0.00  | 0.00  | 0.00 | 1.00E+00 | no |
| Ces2b  | 0.00  | 0.00  | 0.00 | 1.00E+00 | no |
| Ces2e  | 0.00  | 0.00  | 0.00 | 1.00E+00 | no |
| Ces2f  | 0.00  | 0.00  | 0.00 | 1.00E+00 | no |
| Ces3a  | 0.00  | 0.00  | 0.00 | 1.00E+00 | no |
| Ces3b  | 0.00  | 0.00  | 0.00 | 1.00E+00 | no |
| Ces4a  | 0.00  | 0.00  | 0.00 | 1.00E+00 | no |
| Ces5a  | 0.00  | 0.00  | 0.00 | 1.00E+00 | no |
| Cetn1  | 0.00  | 0.00  | 0.00 | 1.00E+00 | no |
| Cfb    | 0.00  | 0.00  | 0.00 | 1.00E+00 | no |
| Cfd    | 0.00  | 0.00  | 0.00 | 1.00E+00 | no |
| Cfhr1  | 0.00  | 0.00  | 0.00 | 1.00E+00 | no |
| Cga    | 0.00  | 0.00  | 0.00 | 1.00E+00 | no |
| Ch25h  | 0.00  | 0.00  | 0.00 | 1.00E+00 | no |
| Chat   | 0.00  | 0.00  | 0.00 | 1.00E+00 | no |
| Chia   | 0.00  | 0.00  | 0.00 | 1.00E+00 | no |
| Chodl  | 0.00  | 0.00  | 0.00 | 1.00E+00 | no |
| Chrd   | 0.00  | 0.00  | 0.00 | 1.00E+00 | no |
| Chrdl1 | 0.00  | 0.00  | 0.00 | 1.00E+00 | no |
| Chrdl2 | 0.00  | 0.00  | 0.00 | 1.00E+00 | no |
| Chrm1  | 0.00  | 0.00  | 0.00 | 1.00E+00 | no |
| Chrm2  | 0.00  | 0.00  | 0.00 | 1.00E+00 | no |
| Chrm5  | 0.00  | 0.00  | 0.00 | 1.00E+00 | no |
| Chrna1 | 0.00  | 0.00  | 0.00 | 1.00E+00 | no |
| Chrna3 | 0.00  | 0.00  | 0.00 | 1.00E+00 | no |
| Chrna4 | 0.00  | 0.00  | 0.00 | 1.00E+00 | no |
| Chrna5 | 0.00  | 0.00  | 0.00 | 1.00E+00 | no |
| Chrna6 | 0.00  | 0.00  | 0.00 | 1.00E+00 | no |
| Chrna7 | 0.00  | 0.00  | 0.00 | 1.00E+00 | no |
| Chrb3  | 0.00  | 0.00  | 0.00 | 1.00E+00 | no |
| Chrnd  | 0.00  | 0.00  | 0.00 | 1.00E+00 | no |
| Chrne  | 0.00  | 0.00  | 0.00 | 1.00E+00 | no |



|         |       |       |      |          |    |
|---------|-------|-------|------|----------|----|
| Chrng   | 0.00  | 0.00  | 0.00 | 1.00E+00 | no |
| Chst4   | 0.00  | 0.00  | 0.00 | 1.00E+00 | no |
| Chst5   | 0.00  | 0.00  | 0.00 | 1.00E+00 | no |
| Chst8   | 0.00  | 0.00  | 0.00 | 1.00E+00 | no |
| Chst9   | 0.00  | 0.00  | 0.00 | 1.00E+00 | no |
| Chsy3   | 0.00  | 0.00  | 0.00 | 1.00E+00 | no |
| Cib4    | 0.00  | 0.00  | 0.00 | 1.00E+00 | no |
| Cic     | 48.88 | 39.91 | 0.00 | 1.00E+00 | no |
| Cidea   | 0.00  | 0.00  | 0.00 | 1.00E+00 | no |
| Cidec   | 0.00  | 0.00  | 0.00 | 1.00E+00 | no |
| Ckmt2   | 0.00  | 0.00  | 0.00 | 1.00E+00 | no |
| Clca3   | 0.00  | 0.00  | 0.00 | 1.00E+00 | no |
| Clca4   | 0.00  | 0.00  | 0.00 | 1.00E+00 | no |
| Clca5   | 0.00  | 0.00  | 0.00 | 1.00E+00 | no |
| Clca6   | 0.00  | 0.00  | 0.00 | 1.00E+00 | no |
| Clcnka  | 0.00  | 0.00  | 0.00 | 1.00E+00 | no |
| Clcnkb  | 0.00  | 0.00  | 0.00 | 1.00E+00 | no |
| Cldn10  | 4.41  | 0.00  | 0.00 | 1.00E+00 | no |
| Cldn11  | 0.00  | 0.00  | 0.00 | 1.00E+00 | no |
| Cldn14  | 0.00  | 0.00  | 0.00 | 1.00E+00 | no |
| Cldn16  | 0.00  | 0.00  | 0.00 | 1.00E+00 | no |
| Cldn17  | 0.00  | 0.00  | 0.00 | 1.00E+00 | no |
| Cldn18  | 0.00  | 0.00  | 0.00 | 1.00E+00 | no |
| Cldn23  | 0.00  | 0.00  | 0.00 | 1.00E+00 | no |
| Cldn5   | 0.00  | 0.00  | 0.00 | 1.00E+00 | no |
| Cldn6   | 0.00  | 0.00  | 0.00 | 1.00E+00 | no |
| Cldn8   | 0.00  | 0.00  | 0.00 | 1.00E+00 | no |
| Cldn9   | 0.00  | 0.00  | 0.00 | 1.00E+00 | no |
| Clec12b | 0.00  | 0.00  | 0.00 | 1.00E+00 | no |
| Clec3a  | 0.00  | 0.00  | 0.00 | 1.00E+00 | no |
| Clec4a2 | 0.00  | 0.00  | 0.00 | 1.00E+00 | no |
| Clec4b1 | 0.00  | 0.00  | 0.00 | 1.00E+00 | no |
| Clec4d  | 0.00  | 0.00  | 0.00 | 1.00E+00 | no |
| Clmn    | 0.00  | 0.00  | 0.00 | 1.00E+00 | no |
| Clps    | 0.00  | 0.00  | 0.00 | 1.00E+00 | no |
| Clrn1   | 0.00  | 0.00  | 0.00 | 1.00E+00 | no |
| Clrn2   | 0.00  | 0.00  | 0.00 | 1.00E+00 | no |
| Clstn2  | 0.00  | 0.00  | 0.00 | 1.00E+00 | no |
| Clu     | 0.00  | 0.00  | 0.00 | 1.00E+00 | no |
| Clvs1   | 0.00  | 0.00  | 0.00 | 1.00E+00 | no |
| Clvs2   | 0.00  | 0.00  | 0.00 | 1.00E+00 | no |
| Cma1    | 0.00  | 0.00  | 0.00 | 1.00E+00 | no |

|          |       |       |      |          |    |
|----------|-------|-------|------|----------|----|
| Cma2     | 0.00  | 0.00  | 0.00 | 1.00E+00 | no |
| Cml3     | 0.00  | 0.00  | 0.00 | 1.00E+00 | no |
| Cml5     | 0.00  | 0.00  | 0.00 | 1.00E+00 | no |
| Cmtm2b   | 0.00  | 0.00  | 0.00 | 1.00E+00 | no |
| Cmtm5    | 0.00  | 0.00  | 0.00 | 1.00E+00 | no |
| Cndp1    | 0.00  | 0.00  | 0.00 | 1.00E+00 | no |
| Cnfn     | 0.00  | 0.00  | 0.00 | 1.00E+00 | no |
| Cnga1    | 0.00  | 0.00  | 0.00 | 1.00E+00 | no |
| Cnga2    | 0.00  | 0.00  | 0.00 | 1.00E+00 | no |
| Cnga3    | 0.00  | 0.00  | 0.00 | 1.00E+00 | no |
| Cnih3    | 0.00  | 0.00  | 0.00 | 1.00E+00 | no |
| Cnot4    | 17.72 | 15.93 | 0.00 | 1.00E+00 | no |
| Cnpy1    | 0.00  | 0.00  | 0.00 | 1.00E+00 | no |
| Cnr1     | 0.00  | 0.00  | 0.00 | 1.00E+00 | no |
| Cntfr    | 0.00  | 0.00  | 0.00 | 1.00E+00 | no |
| Cntn1    | 0.00  | 0.00  | 0.00 | 1.00E+00 | no |
| Cntn3    | 0.00  | 0.00  | 0.00 | 1.00E+00 | no |
| Cntn5    | 0.00  | 0.00  | 0.00 | 1.00E+00 | no |
| Cntn6    | 0.00  | 0.00  | 0.00 | 1.00E+00 | no |
| Cntnap2  | 0.00  | 0.00  | 0.00 | 1.00E+00 | no |
| Cntnap3  | 0.00  | 0.00  | 0.00 | 1.00E+00 | no |
| Cntnap4  | 0.00  | 0.00  | 0.00 | 1.00E+00 | no |
| Cntnap5a | 0.00  | 0.00  | 0.00 | 1.00E+00 | no |
| Cntnap5b | 0.00  | 0.00  | 0.00 | 1.00E+00 | no |
| Cntnap5c | 0.00  | 0.00  | 0.00 | 1.00E+00 | no |
| Coch     | 0.00  | 0.00  | 0.00 | 1.00E+00 | no |
| Col11a1  | 0.00  | 0.00  | 0.00 | 1.00E+00 | no |
| Col13a1  | 0.00  | 0.00  | 0.00 | 1.00E+00 | no |
| Col22a1  | 0.00  | 0.00  | 0.00 | 1.00E+00 | no |
| Col24a1  | 0.00  | 0.00  | 0.00 | 1.00E+00 | no |
| Col2a1   | 0.00  | 0.00  | 0.00 | 1.00E+00 | no |
| Col3a1   | 0.00  | 0.00  | 0.00 | 1.00E+00 | no |
| Col4a5   | 0.00  | 0.00  | 0.00 | 1.00E+00 | no |
| Col6a1   | 0.00  | 0.00  | 0.00 | 1.00E+00 | no |
| Col8a1   | 0.00  | 0.00  | 0.00 | 1.00E+00 | no |
| Col8a2   | 0.00  | 0.00  | 0.00 | 1.00E+00 | no |
| Col9a1   | 0.00  | 0.00  | 0.00 | 1.00E+00 | no |
| Col9a2   | 0.00  | 0.00  | 0.00 | 1.00E+00 | no |
| Colec10  | 0.00  | 0.00  | 0.00 | 1.00E+00 | no |
| Corin    | 0.00  | 0.00  | 0.00 | 1.00E+00 | no |
| Cox7b2   | 0.00  | 0.00  | 0.00 | 1.00E+00 | no |
| Cox8b    | 0.00  | 0.00  | 0.00 | 1.00E+00 | no |

|        |      |      |      |          |    |
|--------|------|------|------|----------|----|
| Cox8c  | 0.00 | 0.00 | 0.00 | 1.00E+00 | no |
| Cpa1   | 0.00 | 0.00 | 0.00 | 1.00E+00 | no |
| Cpa2   | 0.00 | 0.00 | 0.00 | 1.00E+00 | no |
| Cpa4   | 0.00 | 0.00 | 0.00 | 1.00E+00 | no |
| Cpa5   | 0.00 | 0.00 | 0.00 | 1.00E+00 | no |
| Cpa6   | 0.00 | 0.00 | 0.00 | 1.00E+00 | no |
| Cpb1   | 0.00 | 0.00 | 0.00 | 1.00E+00 | no |
| Cpb2   | 0.00 | 0.00 | 0.00 | 1.00E+00 | no |
| Cpe    | 0.00 | 0.00 | 0.00 | 1.00E+00 | no |
| Cphx   | 0.00 | 0.00 | 0.00 | 1.00E+00 | no |
| Cplx3  | 0.00 | 0.00 | 0.00 | 1.00E+00 | no |
| Cplx4  | 0.00 | 0.00 | 0.00 | 1.00E+00 | no |
| Cpne4  | 0.00 | 0.00 | 0.00 | 1.00E+00 | no |
| Cpne6  | 0.00 | 0.00 | 0.00 | 1.00E+00 | no |
| Cps1   | 0.00 | 0.00 | 0.00 | 1.00E+00 | no |
| Cpvl   | 0.00 | 0.00 | 0.00 | 1.00E+00 | no |
| Cpxcr1 | 0.00 | 0.00 | 0.00 | 1.00E+00 | no |
| Cpxm2  | 0.00 | 0.00 | 0.00 | 1.00E+00 | no |
| Cpz    | 0.00 | 0.00 | 0.00 | 1.00E+00 | no |
| Crabp1 | 0.00 | 0.00 | 0.00 | 1.00E+00 | no |
| Crct1  | 0.00 | 0.00 | 0.00 | 1.00E+00 | no |
| Creg2  | 0.00 | 0.00 | 0.00 | 1.00E+00 | no |
| Crh    | 0.00 | 0.00 | 0.00 | 1.00E+00 | no |
| Crhr2  | 0.00 | 0.00 | 0.00 | 1.00E+00 | no |
| Crip3  | 0.00 | 0.00 | 0.00 | 1.00E+00 | no |
| Crisp2 | 0.00 | 0.00 | 0.00 | 1.00E+00 | no |
| Crisp3 | 0.00 | 0.00 | 0.00 | 1.00E+00 | no |
| Crisp4 | 0.00 | 0.00 | 0.00 | 1.00E+00 | no |
| Crnn   | 0.00 | 0.00 | 0.00 | 1.00E+00 | no |
| Crp    | 0.00 | 0.00 | 0.00 | 1.00E+00 | no |
| Crx    | 0.00 | 0.00 | 0.00 | 1.00E+00 | no |
| Crxos1 | 0.00 | 0.00 | 0.00 | 1.00E+00 | no |
| Cryba1 | 0.00 | 0.00 | 0.00 | 1.00E+00 | no |
| Cryba2 | 0.00 | 0.00 | 0.00 | 1.00E+00 | no |
| Crybb2 | 0.00 | 0.00 | 0.00 | 1.00E+00 | no |
| Cryga  | 0.00 | 0.00 | 0.00 | 1.00E+00 | no |
| Crygb  | 0.00 | 0.00 | 0.00 | 1.00E+00 | no |
| Crygc  | 0.00 | 0.00 | 0.00 | 1.00E+00 | no |
| Crygd  | 0.00 | 0.00 | 0.00 | 1.00E+00 | no |
| Cryge  | 0.00 | 0.00 | 0.00 | 1.00E+00 | no |
| Crygf  | 0.00 | 0.00 | 0.00 | 1.00E+00 | no |
| Crygs  | 0.00 | 0.00 | 0.00 | 1.00E+00 | no |

|           |       |       |      |          |    |
|-----------|-------|-------|------|----------|----|
| Csf2      | 0.00  | 0.00  | 0.00 | 1.00E+00 | no |
| Csmd3     | 0.00  | 0.00  | 0.00 | 1.00E+00 | no |
| Csn1s1    | 0.00  | 0.00  | 0.00 | 1.00E+00 | no |
| Csn1s2a   | 0.00  | 0.00  | 0.00 | 1.00E+00 | no |
| Csn1s2b   | 0.00  | 0.00  | 0.00 | 1.00E+00 | no |
| Csn2      | 0.00  | 0.00  | 0.00 | 1.00E+00 | no |
| Csn3      | 0.00  | 0.00  | 0.00 | 1.00E+00 | no |
| Csnka2ip  | 0.00  | 0.00  | 0.00 | 1.00E+00 | no |
| Cspg5     | 0.00  | 0.00  | 0.00 | 1.00E+00 | no |
| Csprs     | 0.00  | 0.00  | 0.00 | 1.00E+00 | no |
| Csrnp3    | 0.00  | 0.00  | 0.00 | 1.00E+00 | no |
| Csrp3     | 0.00  | 0.00  | 0.00 | 1.00E+00 | no |
| Cst10     | 0.00  | 0.00  | 0.00 | 1.00E+00 | no |
| Cst11     | 0.00  | 0.00  | 0.00 | 1.00E+00 | no |
| Cst12     | 0.00  | 0.00  | 0.00 | 1.00E+00 | no |
| Cst13     | 0.00  | 0.00  | 0.00 | 1.00E+00 | no |
| Cst6      | 0.00  | 0.00  | 0.00 | 1.00E+00 | no |
| Cst8      | 0.00  | 0.00  | 0.00 | 1.00E+00 | no |
| Cst9      | 0.00  | 0.00  | 0.00 | 1.00E+00 | no |
| Cstl1     | 0.00  | 0.00  | 0.00 | 1.00E+00 | no |
| Ctag2     | 0.00  | 0.00  | 0.00 | 1.00E+00 | no |
| Ctcfl     | 0.00  | 0.00  | 0.00 | 1.00E+00 | no |
| Ctgf      | 0.00  | 0.00  | 0.00 | 1.00E+00 | no |
| Cthrc1    | 0.00  | 0.00  | 0.00 | 1.00E+00 | no |
| Ctnna2    | 0.00  | 0.00  | 0.00 | 1.00E+00 | no |
| Ctrb1     | 0.00  | 0.00  | 0.00 | 1.00E+00 | no |
| Ctrc      | 0.00  | 0.00  | 0.00 | 1.00E+00 | no |
| Cts3      | 0.00  | 0.00  | 0.00 | 1.00E+00 | no |
| Cts6      | 0.00  | 0.00  | 0.00 | 1.00E+00 | no |
| Cts7      | 0.00  | 0.00  | 0.00 | 1.00E+00 | no |
| Cts8      | 0.00  | 0.00  | 0.00 | 1.00E+00 | no |
| Cts8-ps   | 0.00  | 0.00  | 0.00 | 1.00E+00 | no |
| Ctsj      | 0.00  | 0.00  | 0.00 | 1.00E+00 | no |
| Ctsll3    | 0.00  | 0.00  | 0.00 | 1.00E+00 | no |
| Ctsm      | 0.00  | 0.00  | 0.00 | 1.00E+00 | no |
| Ctsq      | 0.00  | 0.00  | 0.00 | 1.00E+00 | no |
| Ctsr      | 0.00  | 0.00  | 0.00 | 1.00E+00 | no |
| Cttnbp2nl | 0.00  | 0.00  | 0.00 | 1.00E+00 | no |
| Ctxn2     | 0.00  | 0.00  | 0.00 | 1.00E+00 | no |
| Ctxn3     | 0.00  | 0.00  | 0.00 | 1.00E+00 | no |
| Cuedc2    | 23.33 | 27.25 | 0.00 | 1.00E+00 | no |
| Cuzd1     | 0.00  | 0.00  | 0.00 | 1.00E+00 | no |

|            |      |      |      |          |    |
|------------|------|------|------|----------|----|
| Cwh43      | 0.00 | 0.00 | 0.00 | 1.00E+00 | no |
| Cxcl1      | 0.00 | 0.00 | 0.00 | 1.00E+00 | no |
| Cxcl11     | 0.00 | 0.00 | 0.00 | 1.00E+00 | no |
| Cxcl13     | 0.00 | 0.00 | 0.00 | 1.00E+00 | no |
| Cxcl14     | 0.00 | 0.00 | 0.00 | 1.00E+00 | no |
| Cxcl15     | 0.00 | 0.00 | 0.00 | 1.00E+00 | no |
| Cxcl17     | 0.00 | 0.00 | 0.00 | 1.00E+00 | no |
| Cxcl2      | 0.00 | 0.00 | 0.00 | 1.00E+00 | no |
| Cxcl3      | 0.00 | 0.00 | 0.00 | 1.00E+00 | no |
| Cxcl5      | 0.00 | 0.00 | 0.00 | 1.00E+00 | no |
| Cxcr1      | 0.00 | 0.00 | 0.00 | 1.00E+00 | no |
| Cxxc4      | 0.00 | 0.00 | 0.00 | 1.00E+00 | no |
| Cyb5r2     | 0.00 | 0.00 | 0.00 | 1.00E+00 | no |
| Cyct       | 0.00 | 0.00 | 0.00 | 1.00E+00 | no |
| Cylc1      | 0.00 | 0.00 | 0.00 | 1.00E+00 | no |
| Cylc2      | 0.00 | 0.00 | 0.00 | 1.00E+00 | no |
| Cym        | 0.00 | 0.00 | 0.00 | 1.00E+00 | no |
| Cyp19a1    | 0.00 | 0.00 | 0.00 | 1.00E+00 | no |
| Cyp1a1     | 0.00 | 0.00 | 0.00 | 1.00E+00 | no |
| Cyp1a2     | 0.00 | 0.00 | 0.00 | 1.00E+00 | no |
| Cyp1b1     | 0.00 | 0.00 | 0.00 | 1.00E+00 | no |
| Cyp24a1    | 0.00 | 0.00 | 0.00 | 1.00E+00 | no |
| Cyp26b1    | 0.00 | 0.00 | 0.00 | 1.00E+00 | no |
| Cyp2a22    | 0.00 | 0.00 | 0.00 | 1.00E+00 | no |
| Cyp2a4     | 0.00 | 0.00 | 0.00 | 1.00E+00 | no |
| Cyp2a5     | 0.00 | 0.00 | 0.00 | 1.00E+00 | no |
| Cyp2b10    | 0.00 | 0.00 | 0.00 | 1.00E+00 | no |
| Cyp2b13    | 0.00 | 0.00 | 0.00 | 1.00E+00 | no |
| Cyp2b19    | 0.00 | 0.00 | 0.00 | 1.00E+00 | no |
| Cyp2b23    | 0.00 | 0.00 | 0.00 | 1.00E+00 | no |
| Cyp2b9     | 0.00 | 0.00 | 0.00 | 1.00E+00 | no |
| Cyp2c29    | 0.00 | 0.00 | 0.00 | 1.00E+00 | no |
| Cyp2c37    | 0.00 | 0.00 | 0.00 | 1.00E+00 | no |
| Cyp2c38    | 0.00 | 0.00 | 0.00 | 1.00E+00 | no |
| Cyp2c39    | 0.00 | 0.00 | 0.00 | 1.00E+00 | no |
| Cyp2c40    | 0.00 | 0.00 | 0.00 | 1.00E+00 | no |
| Cyp2c44    | 0.00 | 0.00 | 0.00 | 1.00E+00 | no |
| Cyp2c50    | 0.00 | 0.00 | 0.00 | 1.00E+00 | no |
| Cyp2c53-ps | 0.00 | 0.00 | 0.00 | 1.00E+00 | no |
| Cyp2c54    | 0.00 | 0.00 | 0.00 | 1.00E+00 | no |
| Cyp2c55    | 0.00 | 0.00 | 0.00 | 1.00E+00 | no |
| Cyp2c65    | 0.00 | 0.00 | 0.00 | 1.00E+00 | no |

|             |      |      |      |          |    |
|-------------|------|------|------|----------|----|
| Cyp2c66     | 0.00 | 0.00 | 0.00 | 1.00E+00 | no |
| Cyp2c67     | 0.00 | 0.00 | 0.00 | 1.00E+00 | no |
| Cyp2c68     | 0.00 | 0.00 | 0.00 | 1.00E+00 | no |
| Cyp2c69     | 0.00 | 0.00 | 0.00 | 1.00E+00 | no |
| Cyp2c70     | 0.00 | 0.00 | 0.00 | 1.00E+00 | no |
| Cyp2d11     | 0.00 | 0.00 | 0.00 | 1.00E+00 | no |
| Cyp2d12     | 0.00 | 0.00 | 0.00 | 1.00E+00 | no |
| Cyp2d13     | 0.00 | 0.00 | 0.00 | 1.00E+00 | no |
| Cyp2d22     | 1.62 | 1.24 | 0.00 | 1.00E+00 | no |
| Cyp2d34     | 0.00 | 0.00 | 0.00 | 1.00E+00 | no |
| Cyp2d37-ps  | 0.00 | 0.00 | 0.00 | 1.00E+00 | no |
| Cyp2d40     | 0.00 | 0.00 | 0.00 | 1.00E+00 | no |
| Cyp2d9      | 0.00 | 0.00 | 0.00 | 1.00E+00 | no |
| Cyp2e1      | 0.00 | 0.00 | 0.00 | 1.00E+00 | no |
| Cyp2f2      | 0.00 | 0.00 | 0.00 | 1.00E+00 | no |
| Cyp2g1      | 0.00 | 0.00 | 0.00 | 1.00E+00 | no |
| Cyp2j11-ps  | 0.00 | 0.00 | 0.00 | 1.00E+00 | no |
| Cyp2j12-ps  | 0.00 | 0.00 | 0.00 | 1.00E+00 | no |
| Cyp2j13     | 0.00 | 0.00 | 0.00 | 1.00E+00 | no |
| Cyp2j5      | 0.00 | 0.00 | 0.00 | 1.00E+00 | no |
| Cyp2w1      | 0.00 | 0.00 | 0.00 | 1.00E+00 | no |
| Cyp3a11     | 0.00 | 0.00 | 0.00 | 1.00E+00 | no |
| Cyp3a13     | 0.00 | 0.00 | 0.00 | 1.00E+00 | no |
| Cyp3a16     | 0.00 | 0.00 | 0.00 | 1.00E+00 | no |
| Cyp3a25     | 0.00 | 0.00 | 0.00 | 1.00E+00 | no |
| Cyp3a41a    | 0.00 | 0.00 | 0.00 | 1.00E+00 | no |
| Cyp3a41b    | 0.00 | 0.00 | 0.00 | 1.00E+00 | no |
| Cyp3a44     | 0.00 | 0.00 | 0.00 | 1.00E+00 | no |
| Cyp3a57     | 0.00 | 0.00 | 0.00 | 1.00E+00 | no |
| Cyp3a59     | 0.00 | 0.00 | 0.00 | 1.00E+00 | no |
| Cyp4a10     | 0.00 | 0.00 | 0.00 | 1.00E+00 | no |
| Cyp4a12a    | 0.00 | 0.00 | 0.00 | 1.00E+00 | no |
| Cyp4a12b    | 0.00 | 0.00 | 0.00 | 1.00E+00 | no |
| Cyp4a14     | 0.00 | 0.00 | 0.00 | 1.00E+00 | no |
| Cyp4a29-ps  | 0.00 | 0.00 | 0.00 | 1.00E+00 | no |
| Cyp4a30b-ps | 0.00 | 0.00 | 0.00 | 1.00E+00 | no |
| Cyp4a31     | 0.00 | 0.00 | 0.00 | 1.00E+00 | no |
| Cyp4a32     | 0.00 | 0.00 | 0.00 | 1.00E+00 | no |
| Cyp4f39     | 0.00 | 0.00 | 0.00 | 1.00E+00 | no |
| Cyp4x1      | 0.00 | 0.00 | 0.00 | 1.00E+00 | no |
| Cyp7a1      | 0.00 | 0.00 | 0.00 | 1.00E+00 | no |
| Cyp8b1      | 0.00 | 0.00 | 0.00 | 1.00E+00 | no |

|               |      |      |      |          |    |
|---------------|------|------|------|----------|----|
| Cypt1,Cypt8   | 0.00 | 0.00 | 0.00 | 1.00E+00 | no |
| Cypt12        | 0.00 | 0.00 | 0.00 | 1.00E+00 | no |
| Cypt14        | 0.00 | 0.00 | 0.00 | 1.00E+00 | no |
| Cypt15        | 0.00 | 0.00 | 0.00 | 1.00E+00 | no |
| Cypt2-ps      | 0.00 | 0.00 | 0.00 | 1.00E+00 | no |
| Cypt3         | 0.00 | 0.00 | 0.00 | 1.00E+00 | no |
| Cypt4,Cypt9   | 0.00 | 0.00 | 0.00 | 1.00E+00 | no |
| Cypt7         | 0.00 | 0.00 | 0.00 | 1.00E+00 | no |
| Cypt8         | 0.00 | 0.00 | 0.00 | 1.00E+00 | no |
| Cypt9         | 0.00 | 0.00 | 0.00 | 1.00E+00 | no |
| Cyr61         | 0.00 | 0.00 | 0.00 | 1.00E+00 | no |
| Cys1          | 0.00 | 0.00 | 0.00 | 1.00E+00 | no |
| Cyt11         | 0.00 | 0.00 | 0.00 | 1.00E+00 | no |
| D030025P21Ri  | 0.00 | 0.00 | 0.00 | 1.00E+00 | no |
| D030047H15R   | 0.00 | 0.00 | 0.00 | 1.00E+00 | no |
| D130009I18Ril | 0.00 | 0.00 | 0.00 | 1.00E+00 | no |
| D430041D05R   | 0.00 | 0.00 | 0.00 | 1.00E+00 | no |
| D430050G20    | 0.00 | 0.00 | 0.00 | 1.00E+00 | no |
| D4Bwg0951e    | 0.00 | 0.00 | 0.00 | 1.00E+00 | no |
| D5Ert577e,Gi  | 0.00 | 0.00 | 0.00 | 1.00E+00 | no |
| D630002G06R   | 0.00 | 0.00 | 0.00 | 1.00E+00 | no |
| D630003M21F   | 0.00 | 0.00 | 0.00 | 1.00E+00 | no |
| D630023F18Ri  | 0.00 | 0.00 | 0.00 | 1.00E+00 | no |
| D630042F21Ri  | 0.00 | 0.00 | 0.00 | 1.00E+00 | no |
| D630042P16Ri  | 0.00 | 0.00 | 0.00 | 1.00E+00 | no |
| D6Ert527e     | 0.00 | 0.00 | 0.00 | 1.00E+00 | no |
| D730001G18R   | 0.00 | 0.00 | 0.00 | 1.00E+00 | no |
| D730048I06Ril | 0.00 | 0.00 | 0.00 | 1.00E+00 | no |
| D7Ert443e     | 0.00 | 0.00 | 0.00 | 1.00E+00 | no |
| D7Ert715e     | 0.00 | 0.00 | 0.00 | 1.00E+00 | no |
| D830030K20Ri  | 0.00 | 0.00 | 0.00 | 1.00E+00 | no |
| DXBay18,Gm1   | 0.00 | 0.00 | 0.00 | 1.00E+00 | no |
| Dab1          | 0.00 | 0.00 | 0.00 | 1.00E+00 | no |
| Dab2          | 0.00 | 0.00 | 0.00 | 1.00E+00 | no |
| Dach1         | 0.00 | 0.00 | 0.00 | 1.00E+00 | no |
| Dact1         | 0.00 | 0.00 | 0.00 | 1.00E+00 | no |
| Dact2         | 0.00 | 0.00 | 0.00 | 1.00E+00 | no |
| Dapl1         | 0.00 | 0.00 | 0.00 | 1.00E+00 | no |
| Darc          | 0.00 | 0.00 | 0.00 | 1.00E+00 | no |
| Dbc1          | 0.00 | 0.00 | 0.00 | 1.00E+00 | no |
| Dbpht2        | 0.00 | 0.00 | 0.00 | 1.00E+00 | no |
| Dcaf12l1      | 0.04 | 0.00 | 0.00 | 1.00E+00 | no |

|                |       |       |      |          |    |
|----------------|-------|-------|------|----------|----|
| Dcaf12l2       | 0.00  | 0.00  | 0.00 | 1.00E+00 | no |
| Dcc            | 0.00  | 0.00  | 0.00 | 1.00E+00 | no |
| Dcdc2c         | 0.00  | 0.00  | 0.00 | 1.00E+00 | no |
| Dclk1          | 0.00  | 0.00  | 0.00 | 1.00E+00 | no |
| Dclk3          | 0.00  | 0.00  | 0.00 | 1.00E+00 | no |
| Dcn            | 0.00  | 0.00  | 0.00 | 1.00E+00 | no |
| Dcpp1          | 0.00  | 0.00  | 0.00 | 1.00E+00 | no |
| Dcpp2          | 0.00  | 0.00  | 0.00 | 1.00E+00 | no |
| Dcpp3          | 0.00  | 0.00  | 0.00 | 1.00E+00 | no |
| Dct            | 0.00  | 0.00  | 0.00 | 1.00E+00 | no |
| Dcx            | 0.00  | 0.00  | 0.00 | 1.00E+00 | no |
| Ddi1           | 0.00  | 0.00  | 0.00 | 1.00E+00 | no |
| Ddo            | 0.00  | 0.00  | 0.00 | 1.00E+00 | no |
| Ddr1           | 0.00  | 0.00  | 0.00 | 1.00E+00 | no |
| Ddx19b         | 11.77 | 12.03 | 0.00 | 1.00E+00 | no |
| Ddx4           | 0.18  | 0.00  | 0.00 | 1.00E+00 | no |
| Defa-ps1       | 0.00  | 0.00  | 0.00 | 1.00E+00 | no |
| Defa-ps12      | 0.00  | 0.00  | 0.00 | 1.00E+00 | no |
| Defa-ps13      | 0.00  | 0.00  | 0.00 | 1.00E+00 | no |
| Defa-rs1       | 0.00  | 0.00  | 0.00 | 1.00E+00 | no |
| Defa-rs7,Defa2 | 0.00  | 0.00  | 0.00 | 1.00E+00 | no |
| Defa17         | 0.00  | 0.00  | 0.00 | 1.00E+00 | no |
| Defa20         | 0.00  | 0.00  | 0.00 | 1.00E+00 | no |
| Defa21         | 0.00  | 0.00  | 0.00 | 1.00E+00 | no |
| Defa22         | 0.00  | 0.00  | 0.00 | 1.00E+00 | no |
| Defa23         | 0.00  | 0.00  | 0.00 | 1.00E+00 | no |
| Defa24,Defa6   | 0.00  | 0.00  | 0.00 | 1.00E+00 | no |
| Defa25         | 0.00  | 0.00  | 0.00 | 1.00E+00 | no |
| Defa26         | 0.00  | 0.00  | 0.00 | 1.00E+00 | no |
| Defa3          | 0.00  | 0.00  | 0.00 | 1.00E+00 | no |
| Defa4          | 0.00  | 0.00  | 0.00 | 1.00E+00 | no |
| Defa5          | 0.00  | 0.00  | 0.00 | 1.00E+00 | no |
| Defa6          | 0.00  | 0.00  | 0.00 | 1.00E+00 | no |
| Defb1          | 0.00  | 0.00  | 0.00 | 1.00E+00 | no |
| Defb10         | 0.00  | 0.00  | 0.00 | 1.00E+00 | no |
| Defb11         | 0.00  | 0.00  | 0.00 | 1.00E+00 | no |
| Defb12         | 0.00  | 0.00  | 0.00 | 1.00E+00 | no |
| Defb13         | 0.00  | 0.00  | 0.00 | 1.00E+00 | no |
| Defb14         | 0.00  | 0.00  | 0.00 | 1.00E+00 | no |
| Defb15         | 0.00  | 0.00  | 0.00 | 1.00E+00 | no |
| Defb18         | 0.00  | 0.00  | 0.00 | 1.00E+00 | no |
| Defb19         | 0.00  | 0.00  | 0.00 | 1.00E+00 | no |



|           |       |      |      |          |    |
|-----------|-------|------|------|----------|----|
| Defb2     | 0.00  | 0.00 | 0.00 | 1.00E+00 | no |
| Defb20    | 0.00  | 0.00 | 0.00 | 1.00E+00 | no |
| Defb21    | 0.00  | 0.00 | 0.00 | 1.00E+00 | no |
| Defb22    | 0.00  | 0.00 | 0.00 | 1.00E+00 | no |
| Defb25    | 0.00  | 0.00 | 0.00 | 1.00E+00 | no |
| Defb26    | 0.00  | 0.00 | 0.00 | 1.00E+00 | no |
| Defb28    | 0.00  | 0.00 | 0.00 | 1.00E+00 | no |
| Defb29    | 0.00  | 0.00 | 0.00 | 1.00E+00 | no |
| Defb3     | 0.00  | 0.00 | 0.00 | 1.00E+00 | no |
| Defb30    | 0.00  | 0.00 | 0.00 | 1.00E+00 | no |
| Defb34    | 0.00  | 0.00 | 0.00 | 1.00E+00 | no |
| Defb35    | 0.00  | 0.00 | 0.00 | 1.00E+00 | no |
| Defb36    | 0.00  | 0.00 | 0.00 | 1.00E+00 | no |
| Defb37    | 0.00  | 0.00 | 0.00 | 1.00E+00 | no |
| Defb38    | 0.00  | 0.00 | 0.00 | 1.00E+00 | no |
| Defb39    | 0.00  | 0.00 | 0.00 | 1.00E+00 | no |
| Defb4     | 0.00  | 0.00 | 0.00 | 1.00E+00 | no |
| Defb40    | 0.00  | 0.00 | 0.00 | 1.00E+00 | no |
| Defb41    | 0.00  | 0.00 | 0.00 | 1.00E+00 | no |
| Defb42    | 0.00  | 0.00 | 0.00 | 1.00E+00 | no |
| Defb43    | 0.00  | 0.00 | 0.00 | 1.00E+00 | no |
| Defb44-ps | 0.00  | 0.00 | 0.00 | 1.00E+00 | no |
| Defb45    | 0.00  | 0.00 | 0.00 | 1.00E+00 | no |
| Defb46    | 0.00  | 0.00 | 0.00 | 1.00E+00 | no |
| Defb48    | 0.00  | 0.00 | 0.00 | 1.00E+00 | no |
| Defb48-ps | 0.00  | 0.00 | 0.00 | 1.00E+00 | no |
| Defb5     | 0.00  | 0.00 | 0.00 | 1.00E+00 | no |
| Defb50    | 0.00  | 0.00 | 0.00 | 1.00E+00 | no |
| Defb6     | 0.00  | 0.00 | 0.00 | 1.00E+00 | no |
| Defb7     | 0.00  | 0.00 | 0.00 | 1.00E+00 | no |
| Defb8     | 0.00  | 0.00 | 0.00 | 1.00E+00 | no |
| Defb9     | 0.00  | 0.00 | 0.00 | 1.00E+00 | no |
| Depdc1a   | 30.18 | 0.00 | 0.00 | 1.00E+00 | no |
| Des       | 0.00  | 0.00 | 0.00 | 1.00E+00 | no |
| Dgat2l6   | 0.00  | 0.00 | 0.00 | 1.00E+00 | no |
| Dgkb      | 0.00  | 0.00 | 0.00 | 1.00E+00 | no |
| Dgkq      | 6.15  | 8.60 | 0.00 | 1.00E+00 | no |
| Dhrs7c    | 0.00  | 0.00 | 0.00 | 1.00E+00 | no |
| Dhrsx     | 0.00  | 0.00 | 0.00 | 1.00E+00 | no |
| Dio1      | 0.00  | 0.00 | 0.00 | 1.00E+00 | no |
| Dio3      | 0.00  | 0.00 | 0.00 | 1.00E+00 | no |
| Dio3os    | 0.00  | 0.00 | 0.00 | 1.00E+00 | no |

|          |      |      |      |          |    |
|----------|------|------|------|----------|----|
| Diras1   | 0.00 | 0.00 | 0.00 | 1.00E+00 | no |
| Disp1    | 0.00 | 0.00 | 0.00 | 1.00E+00 | no |
| Dkk2     | 0.00 | 0.00 | 0.00 | 1.00E+00 | no |
| Dlc1     | 0.00 | 0.00 | 0.00 | 1.00E+00 | no |
| Dlg5     | 0.00 | 0.00 | 0.00 | 1.00E+00 | no |
| Dlgap1   | 0.00 | 0.00 | 0.00 | 1.00E+00 | no |
| Dlgap2   | 0.00 | 0.00 | 0.00 | 1.00E+00 | no |
| Dlk1     | 0.00 | 0.00 | 0.00 | 1.00E+00 | no |
| Dlx2     | 0.00 | 0.00 | 0.00 | 1.00E+00 | no |
| Dlx3     | 0.00 | 0.00 | 0.00 | 1.00E+00 | no |
| Dlx4     | 0.00 | 0.00 | 0.00 | 1.00E+00 | no |
| Dlx5     | 0.00 | 0.00 | 0.00 | 1.00E+00 | no |
| Dlx6as   | 0.00 | 0.00 | 0.00 | 1.00E+00 | no |
| Dlx6os1  | 0.00 | 0.00 | 0.00 | 1.00E+00 | no |
| Dmbt1    | 0.00 | 0.00 | 0.00 | 1.00E+00 | no |
| Dmbx1    | 0.00 | 0.00 | 0.00 | 1.00E+00 | no |
| Dmgdh    | 0.00 | 0.00 | 0.00 | 1.00E+00 | no |
| Dmkn     | 0.00 | 0.00 | 0.00 | 1.00E+00 | no |
| Dmp1     | 0.00 | 0.00 | 0.00 | 1.00E+00 | no |
| Dmpk     | 0.00 | 0.00 | 0.00 | 1.00E+00 | no |
| Dmrt1    | 0.00 | 0.00 | 0.00 | 1.00E+00 | no |
| Dmrta1   | 0.00 | 0.00 | 0.00 | 1.00E+00 | no |
| Dmrtc1a  | 0.00 | 0.00 | 0.00 | 1.00E+00 | no |
| Dmrtc1b  | 0.00 | 0.00 | 0.00 | 1.00E+00 | no |
| Dmrtc1c  | 0.00 | 0.00 | 0.00 | 1.00E+00 | no |
| Dmrtc1c2 | 0.00 | 0.00 | 0.00 | 1.00E+00 | no |
| Dnahc6   | 0.00 | 0.00 | 0.00 | 1.00E+00 | no |
| Dnaic1   | 0.00 | 0.00 | 0.00 | 1.00E+00 | no |
| Dnajb8   | 0.00 | 0.00 | 0.00 | 1.00E+00 | no |
| Dnajc22  | 0.00 | 0.00 | 0.00 | 1.00E+00 | no |
| Dnajc5b  | 0.00 | 0.00 | 0.00 | 1.00E+00 | no |
| Dnajc5g  | 0.00 | 0.00 | 0.00 | 1.00E+00 | no |
| Dnase2b  | 0.00 | 0.00 | 0.00 | 1.00E+00 | no |
| Dnm3os   | 0.00 | 0.00 | 0.00 | 1.00E+00 | no |
| Dok5     | 0.00 | 0.00 | 0.00 | 1.00E+00 | no |
| Doxl2    | 0.00 | 0.00 | 0.00 | 1.00E+00 | no |
| Dpep1    | 0.00 | 0.00 | 0.00 | 1.00E+00 | no |
| Dpp6     | 0.00 | 0.00 | 0.00 | 1.00E+00 | no |
| Dppa1    | 0.00 | 0.00 | 0.00 | 1.00E+00 | no |
| Dppa2    | 0.00 | 0.00 | 0.00 | 1.00E+00 | no |
| Dppa3    | 0.00 | 0.00 | 0.00 | 1.00E+00 | no |
| Dppa4    | 0.00 | 0.00 | 0.00 | 1.00E+00 | no |

|              |      |      |      |          |    |
|--------------|------|------|------|----------|----|
| Dppa5a       | 0.00 | 0.00 | 0.00 | 1.00E+00 | no |
| Dpy19l2      | 0.00 | 0.00 | 0.00 | 1.00E+00 | no |
| Dpyd         | 0.00 | 0.00 | 0.00 | 1.00E+00 | no |
| Dpys         | 0.00 | 0.00 | 0.00 | 1.00E+00 | no |
| Dpysl3       | 0.00 | 0.00 | 0.00 | 1.00E+00 | no |
| Dpysl4       | 0.00 | 0.00 | 0.00 | 1.00E+00 | no |
| Drd2         | 0.00 | 0.00 | 0.00 | 1.00E+00 | no |
| Drd3         | 0.00 | 0.00 | 0.00 | 1.00E+00 | no |
| Drd4         | 0.00 | 0.00 | 0.00 | 1.00E+00 | no |
| Dsc1         | 0.00 | 0.00 | 0.00 | 1.00E+00 | no |
| Dsc2         | 0.00 | 0.00 | 0.00 | 1.00E+00 | no |
| Dsc3         | 0.00 | 0.00 | 0.00 | 1.00E+00 | no |
| Dsg1a        | 0.00 | 0.00 | 0.00 | 1.00E+00 | no |
| Dsg1b        | 0.00 | 0.00 | 0.00 | 1.00E+00 | no |
| Dsg1c        | 0.00 | 0.00 | 0.00 | 1.00E+00 | no |
| Dsg3         | 0.00 | 0.00 | 0.00 | 1.00E+00 | no |
| Dsg4         | 0.00 | 0.00 | 0.00 | 1.00E+00 | no |
| Dspp         | 0.00 | 0.00 | 0.00 | 1.00E+00 | no |
| Dub1         | 0.00 | 0.00 | 0.00 | 1.00E+00 | no |
| Dub1a        | 0.00 | 0.00 | 0.00 | 1.00E+00 | no |
| Dub2a        | 0.00 | 0.00 | 0.00 | 1.00E+00 | no |
| Duoxa1       | 0.00 | 0.00 | 0.00 | 1.00E+00 | no |
| Duoxa2       | 0.00 | 0.00 | 0.00 | 1.00E+00 | no |
| Dupd1        | 0.00 | 0.00 | 0.00 | 1.00E+00 | no |
| Dusp13       | 0.00 | 0.00 | 0.00 | 1.00E+00 | no |
| Dusp21       | 0.00 | 0.00 | 0.00 | 1.00E+00 | no |
| Dusp27       | 0.00 | 0.00 | 0.00 | 1.00E+00 | no |
| Dydc2        | 0.00 | 0.00 | 0.00 | 1.00E+00 | no |
| Dync1i1      | 0.00 | 0.00 | 0.00 | 1.00E+00 | no |
| Dysf         | 0.00 | 0.00 | 0.00 | 1.00E+00 | no |
| Dytn         | 0.00 | 0.00 | 0.00 | 1.00E+00 | no |
| Dzip1l       | 0.00 | 0.00 | 0.00 | 1.00E+00 | no |
| E030003E18Ri | 0.00 | 0.00 | 0.00 | 1.00E+00 | no |
| E030010A14Ri | 0.00 | 0.00 | 0.00 | 1.00E+00 | no |
| E030011O05Ri | 0.00 | 0.00 | 0.00 | 1.00E+00 | no |
| E030025P04Ri | 0.00 | 0.00 | 0.00 | 1.00E+00 | no |
| E130304F04Ri | 0.00 | 0.00 | 0.00 | 1.00E+00 | no |
| E130309D14Ri | 0.00 | 0.00 | 0.00 | 1.00E+00 | no |
| E230019M04R  | 0.00 | 0.00 | 0.00 | 1.00E+00 | no |
| E330012B07Ri | 0.00 | 0.00 | 0.00 | 1.00E+00 | no |
| E330014E10Ri | 0.00 | 0.00 | 0.00 | 1.00E+00 | no |
| E330017A01Ri | 0.00 | 0.00 | 0.00 | 1.00E+00 | no |

|              |      |      |      |          |    |
|--------------|------|------|------|----------|----|
| E330021D16Ri | 0.00 | 0.00 | 0.00 | 1.00E+00 | no |
| E530001F21Ri | 0.00 | 0.00 | 0.00 | 1.00E+00 | no |
| EG214403     | 0.00 | 0.00 | 0.00 | 1.00E+00 | no |
| EG654453     | 0.00 | 0.00 | 0.00 | 1.00E+00 | no |
| ENSMUSG0000  | 0.00 | 0.00 | 0.00 | 1.00E+00 | no |
| Ear11        | 0.00 | 0.00 | 0.00 | 1.00E+00 | no |
| Ear14        | 0.00 | 0.00 | 0.00 | 1.00E+00 | no |
| Ear4         | 0.00 | 0.00 | 0.00 | 1.00E+00 | no |
| Ear5         | 0.00 | 0.00 | 0.00 | 1.00E+00 | no |
| Ear6,Ear7    | 0.00 | 0.00 | 0.00 | 1.00E+00 | no |
| Ebf2         | 0.00 | 0.00 | 0.00 | 1.00E+00 | no |
| Ebf3         | 0.00 | 0.00 | 0.00 | 1.00E+00 | no |
| Ecel1        | 0.00 | 0.00 | 0.00 | 1.00E+00 | no |
| Eda2r        | 0.00 | 0.00 | 0.00 | 1.00E+00 | no |
| Edar         | 0.00 | 0.00 | 0.00 | 1.00E+00 | no |
| Eddm3b       | 0.00 | 0.00 | 0.00 | 1.00E+00 | no |
| Edil3        | 0.00 | 0.00 | 0.00 | 1.00E+00 | no |
| Edn1         | 0.00 | 0.00 | 0.00 | 1.00E+00 | no |
| Edn3         | 0.00 | 0.00 | 0.00 | 1.00E+00 | no |
| Ednrb        | 0.00 | 0.00 | 0.00 | 1.00E+00 | no |
| Eef1a2       | 0.00 | 0.00 | 0.00 | 1.00E+00 | no |
| Efcab1       | 0.00 | 0.00 | 0.00 | 1.00E+00 | no |
| Efcab10      | 0.00 | 0.00 | 0.00 | 1.00E+00 | no |
| Efcab3       | 0.00 | 0.00 | 0.00 | 1.00E+00 | no |
| Efcab6       | 0.00 | 0.00 | 0.00 | 1.00E+00 | no |
| Efemp1       | 0.00 | 0.00 | 0.00 | 1.00E+00 | no |
| Efna3        | 0.00 | 0.00 | 0.00 | 1.00E+00 | no |
| Efs          | 0.00 | 0.00 | 0.00 | 1.00E+00 | no |
| Egam-1c      | 0.00 | 0.00 | 0.00 | 1.00E+00 | no |
| Egfbp2       | 0.00 | 0.00 | 0.00 | 1.00E+00 | no |
| Egfem1       | 0.00 | 0.00 | 0.00 | 1.00E+00 | no |
| Egflam       | 0.00 | 0.00 | 0.00 | 1.00E+00 | no |
| Eif4e1b      | 0.00 | 0.00 | 0.00 | 1.00E+00 | no |
| Elavl2       | 0.00 | 0.00 | 0.00 | 1.00E+00 | no |
| Elavl4       | 0.00 | 0.00 | 0.00 | 1.00E+00 | no |
| Elf3         | 0.00 | 0.00 | 0.00 | 1.00E+00 | no |
| Elf5         | 0.00 | 0.00 | 0.00 | 1.00E+00 | no |
| Elmod1       | 0.00 | 0.00 | 0.00 | 1.00E+00 | no |
| Elmod2       | 8.52 | 9.70 | 0.00 | 1.00E+00 | no |
| Eln          | 0.00 | 0.00 | 0.00 | 1.00E+00 | no |
| Elov13       | 0.00 | 0.00 | 0.00 | 1.00E+00 | no |
| Emilin3      | 0.00 | 0.00 | 0.00 | 1.00E+00 | no |

|        |       |       |      |          |    |
|--------|-------|-------|------|----------|----|
| Emp2   | 0.00  | 0.00  | 0.00 | 1.00E+00 | no |
| Emx1   | 0.00  | 0.00  | 0.00 | 1.00E+00 | no |
| Emx2   | 0.00  | 0.00  | 0.00 | 1.00E+00 | no |
| Emx2os | 0.00  | 0.00  | 0.00 | 1.00E+00 | no |
| En1    | 0.00  | 0.00  | 0.00 | 1.00E+00 | no |
| En2    | 0.00  | 0.00  | 0.00 | 1.00E+00 | no |
| Enam   | 0.00  | 0.00  | 0.00 | 1.00E+00 | no |
| Enho   | 0.00  | 0.00  | 0.00 | 1.00E+00 | no |
| Enpp2  | 0.00  | 0.00  | 0.00 | 1.00E+00 | no |
| Enpp7  | 0.00  | 0.00  | 0.00 | 1.00E+00 | no |
| Entpd2 | 0.00  | 0.00  | 0.00 | 1.00E+00 | no |
| Entpd8 | 0.00  | 0.00  | 0.00 | 1.00E+00 | no |
| Epha10 | 0.00  | 0.00  | 0.00 | 1.00E+00 | no |
| Epha3  | 0.00  | 0.00  | 0.00 | 1.00E+00 | no |
| Epha4  | 0.00  | 0.00  | 0.00 | 1.00E+00 | no |
| Epha5  | 0.00  | 0.00  | 0.00 | 1.00E+00 | no |
| Epha6  | 0.00  | 0.00  | 0.00 | 1.00E+00 | no |
| Epha8  | 0.00  | 0.00  | 0.00 | 1.00E+00 | no |
| Ephb1  | 0.00  | 0.00  | 0.00 | 1.00E+00 | no |
| Ephb4  | 0.00  | 0.00  | 0.00 | 1.00E+00 | no |
| Epo    | 0.00  | 0.00  | 0.00 | 1.00E+00 | no |
| Eps8l3 | 0.00  | 0.00  | 0.00 | 1.00E+00 | no |
| Epyc   | 0.00  | 0.00  | 0.00 | 1.00E+00 | no |
| Eras   | 0.00  | 0.00  | 0.00 | 1.00E+00 | no |
| Erb2   | 0.00  | 0.00  | 0.00 | 1.00E+00 | no |
| Erb4   | 0.00  | 0.00  | 0.00 | 1.00E+00 | no |
| Erc2   | 0.00  | 0.00  | 0.00 | 1.00E+00 | no |
| Ereg   | 0.00  | 0.00  | 0.00 | 1.00E+00 | no |
| Ermn   | 0.00  | 0.00  | 0.00 | 1.00E+00 | no |
| Esp23  | 0.00  | 0.00  | 0.00 | 1.00E+00 | no |
| Esp34  | 0.00  | 0.00  | 0.00 | 1.00E+00 | no |
| Esp36  | 0.00  | 0.00  | 0.00 | 1.00E+00 | no |
| Esp4   | 0.00  | 0.00  | 0.00 | 1.00E+00 | no |
| Esp8   | 0.00  | 0.00  | 0.00 | 1.00E+00 | no |
| Esr2   | 0.00  | 0.00  | 0.00 | 1.00E+00 | no |
| Esx1   | 0.00  | 0.00  | 0.00 | 1.00E+00 | no |
| Etd    | 0.00  | 0.00  | 0.00 | 1.00E+00 | no |
| Etl4   | 0.00  | 0.00  | 0.00 | 1.00E+00 | no |
| Etv2   | 0.00  | 0.00  | 0.00 | 1.00E+00 | no |
| Etv3   | 16.77 | 26.01 | 0.00 | 1.00E+00 | no |
| Evc    | 0.00  | 0.00  | 0.00 | 1.00E+00 | no |
| Evc2   | 0.00  | 0.00  | 0.00 | 1.00E+00 | no |

|               |       |       |      |          |    |
|---------------|-------|-------|------|----------|----|
| Evx2          | 0.00  | 0.00  | 0.00 | 1.00E+00 | no |
| Exph5         | 0.00  | 0.00  | 0.00 | 1.00E+00 | no |
| Expi          | 0.00  | 0.00  | 0.00 | 1.00E+00 | no |
| Eya4          | 0.00  | 0.00  | 0.00 | 1.00E+00 | no |
| F11           | 0.00  | 0.00  | 0.00 | 1.00E+00 | no |
| F12           | 0.00  | 0.00  | 0.00 | 1.00E+00 | no |
| F8            | 0.00  | 0.00  | 0.00 | 1.00E+00 | no |
| F830002L21Ril | 0.00  | 0.00  | 0.00 | 1.00E+00 | no |
| F830045P16Ri  | 0.00  | 0.00  | 0.00 | 1.00E+00 | no |
| F830116E18Ril | 0.00  | 0.00  | 0.00 | 1.00E+00 | no |
| F930015N05Ri  | 0.03  | 0.00  | 0.00 | 1.00E+00 | no |
| Fabp1         | 0.00  | 0.00  | 0.00 | 1.00E+00 | no |
| Fabp12        | 0.00  | 0.00  | 0.00 | 1.00E+00 | no |
| Fabp6         | 0.00  | 0.00  | 0.00 | 1.00E+00 | no |
| Fabp7         | 0.00  | 0.00  | 0.00 | 1.00E+00 | no |
| Fabp9         | 0.00  | 0.00  | 0.00 | 1.00E+00 | no |
| Faim2         | 0.00  | 0.00  | 0.00 | 1.00E+00 | no |
| Fam115a       | 0.00  | 0.00  | 0.00 | 1.00E+00 | no |
| Fam115e       | 0.00  | 0.00  | 0.00 | 1.00E+00 | no |
| Fam122b       | 13.60 | 10.77 | 0.00 | 1.00E+00 | no |
| Fam122c       | 0.00  | 0.00  | 0.00 | 1.00E+00 | no |
| Fam123a       | 0.00  | 0.00  | 0.00 | 1.00E+00 | no |
| Fam123c       | 0.00  | 0.00  | 0.00 | 1.00E+00 | no |
| Fam131b       | 0.00  | 0.00  | 0.00 | 1.00E+00 | no |
| Fam131c       | 0.00  | 0.00  | 0.00 | 1.00E+00 | no |
| Fam149a       | 0.00  | 0.00  | 0.00 | 1.00E+00 | no |
| Fam150a       | 0.00  | 0.00  | 0.00 | 1.00E+00 | no |
| Fam154a       | 0.00  | 0.00  | 0.00 | 1.00E+00 | no |
| Fam159a       | 0.00  | 0.00  | 0.00 | 1.00E+00 | no |
| Fam159b       | 0.00  | 0.00  | 0.00 | 1.00E+00 | no |
| Fam162b       | 0.00  | 0.00  | 0.00 | 1.00E+00 | no |
| Fam163a       | 0.00  | 0.00  | 0.00 | 1.00E+00 | no |
| Fam170a       | 0.00  | 0.00  | 0.00 | 1.00E+00 | no |
| Fam170b       | 0.00  | 0.00  | 0.00 | 1.00E+00 | no |
| Fam180a       | 0.00  | 0.00  | 0.00 | 1.00E+00 | no |
| Fam181a       | 0.00  | 0.00  | 0.00 | 1.00E+00 | no |
| Fam189a2      | 0.00  | 0.00  | 0.00 | 1.00E+00 | no |
| Fam190a       | 0.00  | 0.00  | 0.00 | 1.00E+00 | no |
| Fam196a       | 0.00  | 0.00  | 0.00 | 1.00E+00 | no |
| Fam19a1       | 0.00  | 0.00  | 0.00 | 1.00E+00 | no |
| Fam19a2       | 0.00  | 0.00  | 0.00 | 1.00E+00 | no |
| Fam19a4       | 0.00  | 0.00  | 0.00 | 1.00E+00 | no |

|           |      |      |      |          |    |
|-----------|------|------|------|----------|----|
| Fam19a5   | 0.00 | 0.00 | 0.00 | 1.00E+00 | no |
| Fam24a    | 0.00 | 0.00 | 0.00 | 1.00E+00 | no |
| Fam26d    | 0.00 | 0.00 | 0.00 | 1.00E+00 | no |
| Fam26e    | 0.00 | 0.00 | 0.00 | 1.00E+00 | no |
| Fam38b    | 0.00 | 0.00 | 0.00 | 1.00E+00 | no |
| Fam40b    | 0.00 | 0.00 | 0.00 | 1.00E+00 | no |
| Fam43b    | 0.00 | 0.00 | 0.00 | 1.00E+00 | no |
| Fam47a-ps | 0.00 | 0.00 | 0.00 | 1.00E+00 | no |
| Fam47e    | 0.00 | 0.00 | 0.00 | 1.00E+00 | no |
| Fam5c     | 0.00 | 0.00 | 0.00 | 1.00E+00 | no |
| Fam69c    | 0.00 | 0.00 | 0.00 | 1.00E+00 | no |
| Fam70b    | 0.00 | 0.00 | 0.00 | 1.00E+00 | no |
| Fam71a    | 0.00 | 0.00 | 0.00 | 1.00E+00 | no |
| Fam71b    | 0.00 | 0.00 | 0.00 | 1.00E+00 | no |
| Fam71d    | 0.00 | 0.00 | 0.00 | 1.00E+00 | no |
| Fam83b    | 0.00 | 0.00 | 0.00 | 1.00E+00 | no |
| Fam83h    | 0.00 | 0.00 | 0.00 | 1.00E+00 | no |
| Fam84a    | 0.00 | 0.00 | 0.00 | 1.00E+00 | no |
| Fam92b    | 0.00 | 0.00 | 0.00 | 1.00E+00 | no |
| Fank1     | 0.00 | 0.00 | 0.00 | 1.00E+00 | no |
| Fat2      | 0.00 | 0.00 | 0.00 | 1.00E+00 | no |
| Fate1     | 0.00 | 0.00 | 0.00 | 1.00E+00 | no |
| Fblim1    | 0.00 | 0.00 | 0.00 | 1.00E+00 | no |
| Fbll1     | 0.00 | 0.00 | 0.00 | 1.00E+00 | no |
| Fbln2     | 0.00 | 0.00 | 0.00 | 1.00E+00 | no |
| Fbn2      | 0.00 | 0.00 | 0.00 | 1.00E+00 | no |
| Fbp2      | 0.00 | 0.00 | 0.00 | 1.00E+00 | no |
| Fbxl15    | 3.67 | 2.56 | 0.00 | 1.00E+00 | no |
| Fbxl7     | 0.00 | 0.00 | 0.00 | 1.00E+00 | no |
| Fbxo15    | 0.00 | 0.00 | 0.00 | 1.00E+00 | no |
| Fbxo16    | 0.00 | 0.00 | 0.00 | 1.00E+00 | no |
| Fbxo27    | 0.00 | 0.00 | 0.00 | 1.00E+00 | no |
| Fbxo41    | 0.00 | 0.00 | 0.00 | 1.00E+00 | no |
| Fbxw15    | 0.00 | 0.00 | 0.00 | 1.00E+00 | no |
| Fbxw16    | 0.00 | 0.00 | 0.00 | 1.00E+00 | no |
| Fbxw18    | 0.00 | 0.00 | 0.00 | 1.00E+00 | no |
| Fbxw19    | 0.00 | 0.00 | 0.00 | 1.00E+00 | no |
| Fbxw20    | 0.00 | 0.00 | 0.00 | 1.00E+00 | no |
| Fbxw21    | 0.00 | 0.00 | 0.00 | 1.00E+00 | no |
| Fbxw22    | 0.00 | 0.00 | 0.00 | 1.00E+00 | no |
| Fbxw24    | 0.00 | 0.00 | 0.00 | 1.00E+00 | no |
| Fbxw26    | 0.00 | 0.00 | 0.00 | 1.00E+00 | no |

|        |       |       |      |          |    |
|--------|-------|-------|------|----------|----|
| Fbxw28 | 0.00  | 0.00  | 0.00 | 1.00E+00 | no |
| Fcrl5  | 0.71  | 0.00  | 0.00 | 1.00E+00 | no |
| Fer1l4 | 0.00  | 0.00  | 0.00 | 1.00E+00 | no |
| Ferd3l | 0.00  | 0.00  | 0.00 | 1.00E+00 | no |
| Fermt2 | 0.00  | 0.00  | 0.00 | 1.00E+00 | no |
| Fev    | 0.00  | 0.00  | 0.00 | 1.00E+00 | no |
| Fez1   | 0.00  | 0.00  | 0.00 | 1.00E+00 | no |
| Fezf1  | 0.00  | 0.00  | 0.00 | 1.00E+00 | no |
| Fezf2  | 0.00  | 0.00  | 0.00 | 1.00E+00 | no |
| Fga    | 0.00  | 0.00  | 0.00 | 1.00E+00 | no |
| Fgb    | 0.00  | 0.00  | 0.00 | 1.00E+00 | no |
| Fgf10  | 0.00  | 0.00  | 0.00 | 1.00E+00 | no |
| Fgf12  | 0.00  | 0.00  | 0.00 | 1.00E+00 | no |
| Fgf14  | 0.00  | 0.00  | 0.00 | 1.00E+00 | no |
| Fgf15  | 0.00  | 0.00  | 0.00 | 1.00E+00 | no |
| Fgf16  | 0.00  | 0.00  | 0.00 | 1.00E+00 | no |
| Fgf20  | 0.00  | 0.00  | 0.00 | 1.00E+00 | no |
| Fgf21  | 0.00  | 0.00  | 0.00 | 1.00E+00 | no |
| Fgf23  | 0.00  | 0.00  | 0.00 | 1.00E+00 | no |
| Fgf4   | 0.00  | 0.00  | 0.00 | 1.00E+00 | no |
| Fgf5   | 0.00  | 0.00  | 0.00 | 1.00E+00 | no |
| Fgf6   | 0.00  | 0.00  | 0.00 | 1.00E+00 | no |
| Fgf8   | 0.00  | 0.00  | 0.00 | 1.00E+00 | no |
| Fgfbp1 | 0.00  | 0.00  | 0.00 | 1.00E+00 | no |
| Fgfr1  | 0.00  | 0.00  | 0.00 | 1.00E+00 | no |
| Fgfr2  | 0.00  | 0.00  | 0.00 | 1.00E+00 | no |
| Fgg    | 0.00  | 0.00  | 0.00 | 1.00E+00 | no |
| Fgl1   | 0.00  | 0.00  | 0.00 | 1.00E+00 | no |
| Fhad1  | 0.00  | 0.00  | 0.00 | 1.00E+00 | no |
| Fhl2   | 0.00  | 0.00  | 0.00 | 1.00E+00 | no |
| Fhl5   | 0.00  | 0.00  | 0.00 | 1.00E+00 | no |
| Fibin  | 0.00  | 0.00  | 0.00 | 1.00E+00 | no |
| Figla  | 0.00  | 0.00  | 0.00 | 1.00E+00 | no |
| Flg2   | 0.00  | 0.00  | 0.00 | 1.00E+00 | no |
| Flii   | 37.75 | 36.86 | 0.00 | 1.00E+00 | no |
| Flnc   | 0.00  | 0.00  | 0.00 | 1.00E+00 | no |
| Flrt3  | 0.00  | 0.00  | 0.00 | 1.00E+00 | no |
| Fmn1   | 0.00  | 0.00  | 0.00 | 1.00E+00 | no |
| Fmo2   | 0.00  | 0.00  | 0.00 | 1.00E+00 | no |
| Fmo3   | 0.00  | 0.00  | 0.00 | 1.00E+00 | no |
| Fmo4   | 0.00  | 0.00  | 0.00 | 1.00E+00 | no |
| Fmo6   | 0.00  | 0.00  | 0.00 | 1.00E+00 | no |



|         |      |      |      |          |    |
|---------|------|------|------|----------|----|
| Fmo9    | 0.00 | 0.00 | 0.00 | 1.00E+00 | no |
| Fmod    | 0.00 | 0.00 | 0.00 | 1.00E+00 | no |
| Fmr1nb  | 0.00 | 0.00 | 0.00 | 1.00E+00 | no |
| Fnd3c2  | 0.00 | 0.00 | 0.00 | 1.00E+00 | no |
| Fndc1   | 0.00 | 0.00 | 0.00 | 1.00E+00 | no |
| Folh1   | 0.00 | 0.00 | 0.00 | 1.00E+00 | no |
| Folr1   | 0.00 | 0.00 | 0.00 | 1.00E+00 | no |
| Fosl1   | 0.00 | 0.00 | 0.00 | 1.00E+00 | no |
| Foxa1   | 0.00 | 0.00 | 0.00 | 1.00E+00 | no |
| Foxa2   | 0.00 | 0.00 | 0.00 | 1.00E+00 | no |
| Foxb1   | 0.00 | 0.00 | 0.00 | 1.00E+00 | no |
| Foxb2   | 0.00 | 0.00 | 0.00 | 1.00E+00 | no |
| Foxd3   | 0.00 | 0.00 | 0.00 | 1.00E+00 | no |
| Foxe1   | 0.00 | 0.00 | 0.00 | 1.00E+00 | no |
| Foxe3   | 0.00 | 0.00 | 0.00 | 1.00E+00 | no |
| Foxf1a  | 0.00 | 0.00 | 0.00 | 1.00E+00 | no |
| Foxf2   | 0.00 | 0.00 | 0.00 | 1.00E+00 | no |
| Foxg1   | 0.00 | 0.00 | 0.00 | 1.00E+00 | no |
| Foxi2   | 0.00 | 0.00 | 0.00 | 1.00E+00 | no |
| Foxi3   | 0.00 | 0.00 | 0.00 | 1.00E+00 | no |
| Foxl1   | 0.00 | 0.00 | 0.00 | 1.00E+00 | no |
| Foxl2   | 0.00 | 0.00 | 0.00 | 1.00E+00 | no |
| Foxn1   | 0.00 | 0.00 | 0.00 | 1.00E+00 | no |
| Foxn4   | 0.00 | 0.00 | 0.00 | 1.00E+00 | no |
| Foxp2   | 0.00 | 0.00 | 0.00 | 1.00E+00 | no |
| Foxq1   | 0.00 | 0.00 | 0.00 | 1.00E+00 | no |
| Foxr2   | 0.00 | 0.00 | 0.00 | 1.00E+00 | no |
| Foxs1   | 0.00 | 0.00 | 0.00 | 1.00E+00 | no |
| Fpr-rs3 | 0.00 | 0.00 | 0.00 | 1.00E+00 | no |
| Fpr-rs4 | 0.00 | 0.00 | 0.00 | 1.00E+00 | no |
| Fpr-rs6 | 0.00 | 0.00 | 0.00 | 1.00E+00 | no |
| Frem1   | 0.00 | 0.00 | 0.00 | 1.00E+00 | no |
| Frem3   | 0.00 | 0.00 | 0.00 | 1.00E+00 | no |
| Frk     | 0.00 | 0.00 | 0.00 | 1.00E+00 | no |
| Frmd3   | 0.00 | 0.00 | 0.00 | 1.00E+00 | no |
| Frmpd3  | 0.00 | 0.00 | 0.00 | 1.00E+00 | no |
| Frmpd4  | 0.00 | 0.00 | 0.00 | 1.00E+00 | no |
| Frzb    | 0.00 | 0.00 | 0.00 | 1.00E+00 | no |
| Fscb    | 0.00 | 0.00 | 0.00 | 1.00E+00 | no |
| Fshb    | 0.00 | 0.00 | 0.00 | 1.00E+00 | no |
| Fshr    | 0.00 | 0.00 | 0.00 | 1.00E+00 | no |
| Fst     | 0.00 | 0.00 | 0.00 | 1.00E+00 | no |

|              |      |      |      |          |    |
|--------------|------|------|------|----------|----|
| Fstl5        | 0.00 | 0.00 | 0.00 | 1.00E+00 | no |
| Fthl17       | 0.00 | 0.00 | 0.00 | 1.00E+00 | no |
| Ftmt         | 0.00 | 0.00 | 0.00 | 1.00E+00 | no |
| Fut1         | 0.00 | 0.00 | 0.00 | 1.00E+00 | no |
| Fut4-ps1     | 0.00 | 0.00 | 0.00 | 1.00E+00 | no |
| Fut9         | 0.00 | 0.00 | 0.00 | 1.00E+00 | no |
| Fxyd1        | 0.00 | 0.00 | 0.00 | 1.00E+00 | no |
| Fxyd3        | 0.00 | 0.00 | 0.00 | 1.00E+00 | no |
| Fxyd4        | 0.00 | 0.00 | 0.00 | 1.00E+00 | no |
| Fzd10        | 0.00 | 0.00 | 0.00 | 1.00E+00 | no |
| Fzd2         | 0.00 | 0.00 | 0.00 | 1.00E+00 | no |
| G630016D24R  | 0.00 | 0.00 | 0.00 | 1.00E+00 | no |
| G630025P09Ri | 0.00 | 0.00 | 0.00 | 1.00E+00 | no |
| G6b          | 0.00 | 0.00 | 0.00 | 1.00E+00 | no |
| G6pc         | 0.00 | 0.00 | 0.00 | 1.00E+00 | no |
| G6pc2        | 0.00 | 0.00 | 0.00 | 1.00E+00 | no |
| Gab2         | 8.54 | 8.80 | 0.00 | 1.00E+00 | no |
| Gabra1       | 0.00 | 0.00 | 0.00 | 1.00E+00 | no |
| Gabra2       | 0.00 | 0.00 | 0.00 | 1.00E+00 | no |
| Gabra3       | 0.00 | 0.00 | 0.00 | 1.00E+00 | no |
| Gabra4       | 0.00 | 0.00 | 0.00 | 1.00E+00 | no |
| Gabra5       | 0.00 | 0.00 | 0.00 | 1.00E+00 | no |
| Gabra6       | 0.00 | 0.00 | 0.00 | 1.00E+00 | no |
| Gabrb1       | 0.00 | 0.00 | 0.00 | 1.00E+00 | no |
| Gabrb2       | 0.00 | 0.00 | 0.00 | 1.00E+00 | no |
| Gabrb3       | 0.00 | 0.00 | 0.00 | 1.00E+00 | no |
| Gabrg1       | 0.00 | 0.00 | 0.00 | 1.00E+00 | no |
| Gabrg2       | 0.00 | 0.00 | 0.00 | 1.00E+00 | no |
| Gabrg3       | 0.00 | 0.00 | 0.00 | 1.00E+00 | no |
| Gabrp        | 0.00 | 0.00 | 0.00 | 1.00E+00 | no |
| Gabrq        | 0.00 | 0.00 | 0.00 | 1.00E+00 | no |
| Gabrr3       | 0.00 | 0.00 | 0.00 | 1.00E+00 | no |
| Gad2         | 0.00 | 0.00 | 0.00 | 1.00E+00 | no |
| Gadl1        | 0.00 | 0.00 | 0.00 | 1.00E+00 | no |
| Galnt13      | 0.00 | 0.00 | 0.00 | 1.00E+00 | no |
| Galntl2      | 0.00 | 0.00 | 0.00 | 1.00E+00 | no |
| Galntl4      | 0.00 | 0.00 | 0.00 | 1.00E+00 | no |
| Galntl5      | 0.00 | 0.00 | 0.00 | 1.00E+00 | no |
| Galp         | 0.00 | 0.00 | 0.00 | 1.00E+00 | no |
| Galr1        | 0.00 | 0.00 | 0.00 | 1.00E+00 | no |
| Gap43        | 0.00 | 0.00 | 0.00 | 1.00E+00 | no |
| Gas1         | 0.00 | 0.00 | 0.00 | 1.00E+00 | no |

|         |      |       |      |          |    |
|---------|------|-------|------|----------|----|
| Gas2l2  | 0.00 | 0.00  | 0.00 | 1.00E+00 | no |
| Gast    | 0.00 | 0.00  | 0.00 | 1.00E+00 | no |
| Gata4   | 0.00 | 0.00  | 0.00 | 1.00E+00 | no |
| Gata5   | 0.00 | 0.00  | 0.00 | 1.00E+00 | no |
| Gata6   | 0.00 | 0.00  | 0.00 | 1.00E+00 | no |
| Gbp6    | 9.62 | 32.98 | 0.00 | 1.00E+00 | no |
| Gc      | 0.00 | 0.00  | 0.00 | 1.00E+00 | no |
| Gck     | 0.00 | 0.00  | 0.00 | 1.00E+00 | no |
| Gckr    | 0.00 | 0.00  | 0.00 | 1.00E+00 | no |
| Gcm1    | 0.00 | 0.00  | 0.00 | 1.00E+00 | no |
| Gcm2    | 0.00 | 0.00  | 0.00 | 1.00E+00 | no |
| Gcnt3   | 0.00 | 0.00  | 0.00 | 1.00E+00 | no |
| Gdap1l1 | 0.00 | 0.00  | 0.00 | 1.00E+00 | no |
| Gdf10   | 0.00 | 0.00  | 0.00 | 1.00E+00 | no |
| Gdf15   | 0.00 | 0.00  | 0.00 | 1.00E+00 | no |
| Gdf2    | 0.00 | 0.00  | 0.00 | 1.00E+00 | no |
| Gdf6    | 0.00 | 0.00  | 0.00 | 1.00E+00 | no |
| Gdf7    | 0.00 | 0.00  | 0.00 | 1.00E+00 | no |
| Gdnf    | 0.00 | 0.00  | 0.00 | 1.00E+00 | no |
| Gfra4   | 0.00 | 0.00  | 0.00 | 1.00E+00 | no |
| Gfral   | 0.00 | 0.00  | 0.00 | 1.00E+00 | no |
| Ghrh    | 0.00 | 0.00  | 0.00 | 1.00E+00 | no |
| Ghrhr   | 0.00 | 0.00  | 0.00 | 1.00E+00 | no |
| Ghsr    | 0.00 | 0.00  | 0.00 | 1.00E+00 | no |
| Gip     | 0.00 | 0.00  | 0.00 | 1.00E+00 | no |
| Gipc2   | 0.00 | 0.00  | 0.00 | 1.00E+00 | no |
| Gja3    | 0.00 | 0.00  | 0.00 | 1.00E+00 | no |
| Gja5    | 0.00 | 0.00  | 0.00 | 1.00E+00 | no |
| Gjb1    | 0.00 | 0.00  | 0.00 | 1.00E+00 | no |
| Gjb2    | 0.00 | 0.00  | 0.00 | 1.00E+00 | no |
| Gjb4    | 0.00 | 0.00  | 0.00 | 1.00E+00 | no |
| Gjb6    | 0.00 | 0.00  | 0.00 | 1.00E+00 | no |
| Gjc3    | 0.00 | 0.00  | 0.00 | 1.00E+00 | no |
| Gjd2    | 0.00 | 0.00  | 0.00 | 1.00E+00 | no |
| Gjd4    | 0.00 | 0.00  | 0.00 | 1.00E+00 | no |
| Gkn1    | 0.00 | 0.00  | 0.00 | 1.00E+00 | no |
| Gkn2    | 0.00 | 0.00  | 0.00 | 1.00E+00 | no |
| Gkn3    | 0.00 | 0.00  | 0.00 | 1.00E+00 | no |
| Glb1l3  | 0.00 | 0.00  | 0.00 | 1.00E+00 | no |
| Gldn    | 0.00 | 0.00  | 0.00 | 1.00E+00 | no |
| Gli2    | 0.00 | 0.00  | 0.00 | 1.00E+00 | no |
| Gli3    | 0.00 | 0.00  | 0.00 | 1.00E+00 | no |

|              |      |      |      |          |    |
|--------------|------|------|------|----------|----|
| Glipr111     | 0.00 | 0.00 | 0.00 | 1.00E+00 | no |
| Glipr112     | 0.00 | 0.00 | 0.00 | 1.00E+00 | no |
| Glod5        | 0.00 | 0.00 | 0.00 | 1.00E+00 | no |
| Glra1        | 0.00 | 0.00 | 0.00 | 1.00E+00 | no |
| Glra2        | 0.00 | 0.00 | 0.00 | 1.00E+00 | no |
| Glra3        | 0.00 | 0.00 | 0.00 | 1.00E+00 | no |
| Glt25d2      | 0.00 | 0.00 | 0.00 | 1.00E+00 | no |
| Glt6d1       | 0.00 | 0.00 | 0.00 | 1.00E+00 | no |
| Gltpd2       | 0.00 | 0.00 | 0.00 | 1.00E+00 | no |
| Glyat        | 0.00 | 0.00 | 0.00 | 1.00E+00 | no |
| Glycam1      | 0.00 | 0.00 | 0.00 | 1.00E+00 | no |
| Gm10052,Hnr1 | 0.00 | 0.00 | 0.00 | 1.00E+00 | no |
| Gm10058,Gm1  | 0.00 | 0.00 | 0.00 | 1.00E+00 | no |
| Gm1006       | 0.00 | 0.00 | 0.00 | 1.00E+00 | no |
| Gm10081      | 0.00 | 0.00 | 0.00 | 1.00E+00 | no |
| Gm10096,Gm1  | 0.00 | 0.00 | 0.00 | 1.00E+00 | no |
| Gm101        | 0.00 | 0.00 | 0.00 | 1.00E+00 | no |
| Gm10104      | 0.00 | 0.00 | 0.00 | 1.00E+00 | no |
| Gm10147      | 0.00 | 0.00 | 0.00 | 1.00E+00 | no |
| Gm10220      | 0.00 | 0.00 | 0.00 | 1.00E+00 | no |
| Gm10229      | 0.00 | 0.00 | 0.00 | 1.00E+00 | no |
| Gm10230      | 0.00 | 0.00 | 0.00 | 1.00E+00 | no |
| Gm10248      | 0.00 | 0.00 | 0.00 | 1.00E+00 | no |
| Gm10267      | 0.00 | 0.00 | 0.00 | 1.00E+00 | no |
| Gm10280      | 0.00 | 0.00 | 0.00 | 1.00E+00 | no |
| Gm10318      | 0.00 | 0.00 | 0.00 | 1.00E+00 | no |
| Gm10319      | 0.00 | 0.00 | 0.00 | 1.00E+00 | no |
| Gm10324      | 0.00 | 0.00 | 0.00 | 1.00E+00 | no |
| Gm10334      | 0.00 | 0.00 | 0.00 | 1.00E+00 | no |
| Gm10375      | 0.00 | 0.00 | 0.00 | 1.00E+00 | no |
| Gm10400      | 0.00 | 0.00 | 0.00 | 1.00E+00 | no |
| Gm10406      | 0.00 | 0.00 | 0.00 | 1.00E+00 | no |
| Gm10421      | 0.00 | 0.00 | 0.00 | 1.00E+00 | no |
| Gm10436      | 0.00 | 0.00 | 0.00 | 1.00E+00 | no |
| Gm10439      | 0.00 | 0.00 | 0.00 | 1.00E+00 | no |
| Gm10466      | 0.00 | 0.00 | 0.00 | 1.00E+00 | no |
| Gm10471      | 0.00 | 0.00 | 0.00 | 1.00E+00 | no |
| Gm10486,Gm1  | 0.00 | 0.00 | 0.00 | 1.00E+00 | no |
| Gm10487      | 0.00 | 0.00 | 0.00 | 1.00E+00 | no |
| Gm10488      | 0.00 | 0.00 | 0.00 | 1.00E+00 | no |
| Gm10494      | 0.00 | 0.00 | 0.00 | 1.00E+00 | no |
| Gm10510      | 0.00 | 0.00 | 0.00 | 1.00E+00 | no |

|              |      |      |      |          |    |
|--------------|------|------|------|----------|----|
| Gm10512      | 0.00 | 0.00 | 0.00 | 1.00E+00 | no |
| Gm10636      | 0.00 | 0.00 | 0.00 | 1.00E+00 | no |
| Gm10639      | 0.00 | 0.00 | 0.00 | 1.00E+00 | no |
| Gm10649      | 0.00 | 0.00 | 0.00 | 1.00E+00 | no |
| Gm10665      | 0.00 | 0.00 | 0.00 | 1.00E+00 | no |
| Gm10666      | 0.00 | 0.00 | 0.00 | 1.00E+00 | no |
| Gm10684      | 0.00 | 0.00 | 0.00 | 1.00E+00 | no |
| Gm10696      | 0.00 | 0.00 | 0.00 | 1.00E+00 | no |
| Gm10754      | 0.00 | 0.00 | 0.00 | 1.00E+00 | no |
| Gm10823      | 0.00 | 0.00 | 0.00 | 1.00E+00 | no |
| Gm10845      | 0.00 | 0.00 | 0.00 | 1.00E+00 | no |
| Gm10921,Gm1  | 0.00 | 0.00 | 0.00 | 1.00E+00 | no |
| Gm10922      | 0.00 | 0.00 | 0.00 | 1.00E+00 | no |
| Gm1110       | 0.00 | 0.00 | 0.00 | 1.00E+00 | no |
| Gm11149      | 0.00 | 0.00 | 0.00 | 1.00E+00 | no |
| Gm11166      | 0.00 | 0.00 | 0.00 | 1.00E+00 | no |
| Gm11190      | 0.00 | 0.00 | 0.00 | 1.00E+00 | no |
| Gm11194      | 0.00 | 0.00 | 0.00 | 1.00E+00 | no |
| Gm1140,Gm14  | 0.00 | 0.00 | 0.00 | 1.00E+00 | no |
| Gm11426      | 0.00 | 0.00 | 0.00 | 1.00E+00 | no |
| Gm11435      | 0.00 | 0.00 | 0.00 | 1.00E+00 | no |
| Gm11437      | 0.00 | 0.00 | 0.00 | 1.00E+00 | no |
| Gm11468      | 0.00 | 0.00 | 0.00 | 1.00E+00 | no |
| Gm11487      | 0.00 | 0.00 | 0.00 | 1.00E+00 | no |
| Gm11545      | 0.00 | 0.00 | 0.00 | 1.00E+00 | no |
| Gm11554      | 0.00 | 0.00 | 0.00 | 1.00E+00 | no |
| Gm11559      | 0.00 | 0.00 | 0.00 | 1.00E+00 | no |
| Gm11562,Krta | 0.00 | 0.00 | 0.00 | 1.00E+00 | no |
| Gm11563      | 0.00 | 0.00 | 0.00 | 1.00E+00 | no |
| Gm11564      | 0.00 | 0.00 | 0.00 | 1.00E+00 | no |
| Gm11565      | 0.00 | 0.00 | 0.00 | 1.00E+00 | no |
| Gm11567      | 0.00 | 0.00 | 0.00 | 1.00E+00 | no |
| Gm11569      | 0.00 | 0.00 | 0.00 | 1.00E+00 | no |
| Gm11595      | 0.00 | 0.00 | 0.00 | 1.00E+00 | no |
| Gm11596      | 0.00 | 0.00 | 0.00 | 1.00E+00 | no |
| Gm11710      | 0.00 | 0.00 | 0.00 | 1.00E+00 | no |
| Gm11711      | 0.00 | 0.00 | 0.00 | 1.00E+00 | no |
| Gm11744      | 0.00 | 0.00 | 0.00 | 1.00E+00 | no |
| Gm11756      | 0.00 | 0.00 | 0.00 | 1.00E+00 | no |
| Gm11757,Gm1  | 0.00 | 0.00 | 0.00 | 1.00E+00 | no |
| Gm11758      | 0.00 | 0.00 | 0.00 | 1.00E+00 | no |
| Gm11818      | 0.00 | 0.00 | 0.00 | 1.00E+00 | no |

|             |      |      |      |          |    |
|-------------|------|------|------|----------|----|
| Gm11937     | 0.00 | 0.00 | 0.00 | 1.00E+00 | no |
| Gm11938     | 0.00 | 0.00 | 0.00 | 1.00E+00 | no |
| Gm11978     | 0.00 | 0.00 | 0.00 | 1.00E+00 | no |
| Gm11992     | 0.00 | 0.00 | 0.00 | 1.00E+00 | no |
| Gm12        | 0.00 | 0.00 | 0.00 | 1.00E+00 | no |
| Gm12070     | 0.00 | 0.00 | 0.00 | 1.00E+00 | no |
| Gm12169     | 0.00 | 0.00 | 0.00 | 1.00E+00 | no |
| Gm12171     | 0.00 | 0.00 | 0.00 | 1.00E+00 | no |
| Gm12191     | 0.00 | 0.00 | 0.00 | 1.00E+00 | no |
| Gm12298     | 0.00 | 0.00 | 0.00 | 1.00E+00 | no |
| Gm12603     | 0.00 | 0.00 | 0.00 | 1.00E+00 | no |
| Gm12633     | 0.00 | 0.00 | 0.00 | 1.00E+00 | no |
| Gm12695     | 0.00 | 0.00 | 0.00 | 1.00E+00 | no |
| Gm12769     | 0.00 | 0.00 | 0.00 | 1.00E+00 | no |
| Gm12776     | 0.00 | 0.00 | 0.00 | 1.00E+00 | no |
| Gm12789     | 0.00 | 0.00 | 0.00 | 1.00E+00 | no |
| Gm12794     | 0.00 | 0.00 | 0.00 | 1.00E+00 | no |
| Gm12830     | 0.00 | 0.00 | 0.00 | 1.00E+00 | no |
| Gm12839     | 0.00 | 0.00 | 0.00 | 1.00E+00 | no |
| Gm12886     | 0.00 | 0.00 | 0.00 | 1.00E+00 | no |
| Gm12887     | 0.00 | 0.00 | 0.00 | 1.00E+00 | no |
| Gm12888     | 0.00 | 0.00 | 0.00 | 1.00E+00 | no |
| Gm13011     | 0.00 | 0.00 | 0.00 | 1.00E+00 | no |
| Gm13023     | 0.00 | 0.00 | 0.00 | 1.00E+00 | no |
| Gm13043     | 0.00 | 0.00 | 0.00 | 1.00E+00 | no |
| Gm13057     | 0.00 | 0.00 | 0.00 | 1.00E+00 | no |
| Gm13078     | 0.00 | 0.00 | 0.00 | 1.00E+00 | no |
| Gm13083     | 0.00 | 0.00 | 0.00 | 1.00E+00 | no |
| Gm13084     | 0.00 | 0.00 | 0.00 | 1.00E+00 | no |
| Gm13088     | 0.00 | 0.00 | 0.00 | 1.00E+00 | no |
| Gm13101     | 0.00 | 0.00 | 0.00 | 1.00E+00 | no |
| Gm13102     | 0.00 | 0.00 | 0.00 | 1.00E+00 | no |
| Gm13103     | 0.00 | 0.00 | 0.00 | 1.00E+00 | no |
| Gm13109     | 0.00 | 0.00 | 0.00 | 1.00E+00 | no |
| Gm13119     | 0.00 | 0.00 | 0.00 | 1.00E+00 | no |
| Gm13124     | 0.00 | 0.00 | 0.00 | 1.00E+00 | no |
| Gm13125     | 0.00 | 0.00 | 0.00 | 1.00E+00 | no |
| Gm13128     | 0.00 | 0.00 | 0.00 | 1.00E+00 | no |
| Gm13177     | 0.00 | 0.00 | 0.00 | 1.00E+00 | no |
| Gm13178     | 0.00 | 0.00 | 0.00 | 1.00E+00 | no |
| Gm1322      | 0.00 | 0.00 | 0.00 | 1.00E+00 | no |
| Gm13272,Gm1 | 0.00 | 0.00 | 0.00 | 1.00E+00 | no |

|              |      |      |      |          |    |
|--------------|------|------|------|----------|----|
| Gm13275,Gm1  | 0.00 | 0.00 | 0.00 | 1.00E+00 | no |
| Gm13276      | 0.00 | 0.00 | 0.00 | 1.00E+00 | no |
| Gm13277,Gm1  | 0.00 | 0.00 | 0.00 | 1.00E+00 | no |
| Gm13278,Gm1  | 0.00 | 0.00 | 0.00 | 1.00E+00 | no |
| Gm13280      | 0.00 | 0.00 | 0.00 | 1.00E+00 | no |
| Gm13285      | 0.00 | 0.00 | 0.00 | 1.00E+00 | no |
| Gm13287      | 0.00 | 0.00 | 0.00 | 1.00E+00 | no |
| Gm13304      | 0.00 | 0.00 | 0.00 | 1.00E+00 | no |
| Gm136        | 0.00 | 0.00 | 0.00 | 1.00E+00 | no |
| Gm13629      | 0.00 | 0.00 | 0.00 | 1.00E+00 | no |
| Gm13698      | 0.00 | 0.00 | 0.00 | 1.00E+00 | no |
| Gm13749      | 0.00 | 0.00 | 0.00 | 1.00E+00 | no |
| Gm13871      | 0.00 | 0.00 | 0.00 | 1.00E+00 | no |
| Gm14092      | 0.00 | 0.00 | 0.00 | 1.00E+00 | no |
| Gm14151      | 0.00 | 0.00 | 0.00 | 1.00E+00 | no |
| Gm14160      | 0.00 | 0.00 | 0.00 | 1.00E+00 | no |
| Gm14288,Gm1  | 0.00 | 0.00 | 0.00 | 1.00E+00 | no |
| Gm14308,Gm1  | 0.00 | 0.00 | 0.00 | 1.00E+00 | no |
| Gm14316      | 0.00 | 0.00 | 0.00 | 1.00E+00 | no |
| Gm14345,Gm1  | 0.00 | 0.00 | 0.00 | 1.00E+00 | no |
| Gm14346,Gm1  | 0.00 | 0.00 | 0.00 | 1.00E+00 | no |
| Gm14347      | 0.00 | 0.00 | 0.00 | 1.00E+00 | no |
| Gm14351,Gm2  | 0.00 | 0.00 | 0.00 | 1.00E+00 | no |
| Gm14374      | 0.00 | 0.00 | 0.00 | 1.00E+00 | no |
| Gm14430      | 0.00 | 0.00 | 0.00 | 1.00E+00 | no |
| Gm14434      | 0.00 | 0.00 | 0.00 | 1.00E+00 | no |
| Gm14435      | 0.00 | 0.00 | 0.00 | 1.00E+00 | no |
| Gm14440      | 0.00 | 0.00 | 0.00 | 1.00E+00 | no |
| Gm14458      | 0.00 | 0.00 | 0.00 | 1.00E+00 | no |
| Gm14459      | 0.00 | 0.00 | 0.00 | 1.00E+00 | no |
| Gm14483      | 0.00 | 0.00 | 0.00 | 1.00E+00 | no |
| Gm14484      | 0.00 | 0.00 | 0.00 | 1.00E+00 | no |
| Gm14501      | 0.00 | 0.00 | 0.00 | 1.00E+00 | no |
| Gm14511      | 0.00 | 0.00 | 0.00 | 1.00E+00 | no |
| Gm14525      | 0.00 | 0.00 | 0.00 | 1.00E+00 | no |
| Gm14548,Pira | 0.00 | 0.00 | 0.00 | 1.00E+00 | no |
| Gm14685      | 0.00 | 0.00 | 0.00 | 1.00E+00 | no |
| Gm14692      | 0.00 | 0.00 | 0.00 | 1.00E+00 | no |
| Gm14725      | 0.00 | 0.00 | 0.00 | 1.00E+00 | no |
| Gm14743      | 0.00 | 0.00 | 0.00 | 1.00E+00 | no |
| Gm14744      | 0.00 | 0.00 | 0.00 | 1.00E+00 | no |
| Gm14812      | 0.00 | 0.00 | 0.00 | 1.00E+00 | no |

|              |      |      |      |          |    |
|--------------|------|------|------|----------|----|
| Gm14819      | 0.00 | 0.00 | 0.00 | 1.00E+00 | no |
| Gm14850      | 0.00 | 0.00 | 0.00 | 1.00E+00 | no |
| Gm14851      | 0.00 | 0.00 | 0.00 | 1.00E+00 | no |
| Gm15056      | 0.00 | 0.00 | 0.00 | 1.00E+00 | no |
| Gm15085      | 0.00 | 0.00 | 0.00 | 1.00E+00 | no |
| Gm15091      | 0.00 | 0.00 | 0.00 | 1.00E+00 | no |
| Gm15093      | 0.00 | 0.00 | 0.00 | 1.00E+00 | no |
| Gm15097      | 0.00 | 0.00 | 0.00 | 1.00E+00 | no |
| Gm15107      | 0.00 | 0.00 | 0.00 | 1.00E+00 | no |
| Gm15114      | 0.00 | 0.00 | 0.00 | 1.00E+00 | no |
| Gm15127      | 0.00 | 0.00 | 0.00 | 1.00E+00 | no |
| Gm15217      | 0.00 | 0.00 | 0.00 | 1.00E+00 | no |
| Gm1527       | 0.00 | 0.00 | 0.00 | 1.00E+00 | no |
| Gm15284      | 0.00 | 0.00 | 0.00 | 1.00E+00 | no |
| Gm15292      | 0.00 | 0.00 | 0.00 | 1.00E+00 | no |
| Gm15293      | 0.00 | 0.00 | 0.00 | 1.00E+00 | no |
| Gm15299      | 0.00 | 0.00 | 0.00 | 1.00E+00 | no |
| Gm15308      | 0.00 | 0.00 | 0.00 | 1.00E+00 | no |
| Gm15315      | 0.00 | 0.00 | 0.00 | 1.00E+00 | no |
| Gm15348      | 0.00 | 0.00 | 0.00 | 1.00E+00 | no |
| Gm15386      | 0.00 | 0.00 | 0.00 | 1.00E+00 | no |
| Gm15450,Rps: | 0.00 | 0.00 | 0.00 | 1.00E+00 | no |
| Gm156        | 0.00 | 0.00 | 0.00 | 1.00E+00 | no |
| Gm1568       | 0.00 | 0.00 | 0.00 | 1.00E+00 | no |
| Gm1574       | 0.00 | 0.00 | 0.00 | 1.00E+00 | no |
| Gm1587       | 0.00 | 0.00 | 0.00 | 1.00E+00 | no |
| Gm1631       | 0.00 | 0.00 | 0.00 | 1.00E+00 | no |
| Gm16367      | 0.00 | 0.00 | 0.00 | 1.00E+00 | no |
| Gm16387      | 0.00 | 0.00 | 0.00 | 1.00E+00 | no |
| Gm16390      | 0.00 | 0.00 | 0.00 | 1.00E+00 | no |
| Gm16430      | 0.00 | 0.00 | 0.00 | 1.00E+00 | no |
| Gm16432      | 0.00 | 0.00 | 0.00 | 1.00E+00 | no |
| Gm16442      | 0.00 | 0.00 | 0.00 | 1.00E+00 | no |
| Gm16501      | 0.00 | 0.00 | 0.00 | 1.00E+00 | no |
| Gm1661       | 0.00 | 0.00 | 0.00 | 1.00E+00 | no |
| Gm1679       | 0.00 | 0.00 | 0.00 | 1.00E+00 | no |
| Gm1968       | 0.00 | 0.00 | 0.00 | 1.00E+00 | no |
| Gm1973       | 0.00 | 0.00 | 0.00 | 1.00E+00 | no |
| Gm1987       | 0.00 | 0.00 | 0.00 | 1.00E+00 | no |
| Gm1993       | 0.00 | 0.00 | 0.00 | 1.00E+00 | no |
| Gm2012       | 0.00 | 0.00 | 0.00 | 1.00E+00 | no |
| Gm2030       | 0.00 | 0.00 | 0.00 | 1.00E+00 | no |



|             |      |      |      |          |    |
|-------------|------|------|------|----------|----|
| Gm216       | 0.00 | 0.00 | 0.00 | 1.00E+00 | no |
| Gm2663      | 0.00 | 0.00 | 0.00 | 1.00E+00 | no |
| Gm2694      | 0.00 | 0.00 | 0.00 | 1.00E+00 | no |
| Gm2799,Gmcl | 0.00 | 0.00 | 0.00 | 1.00E+00 | no |
| Gm2825      | 0.00 | 0.00 | 0.00 | 1.00E+00 | no |
| Gm2863      | 0.00 | 0.00 | 0.00 | 1.00E+00 | no |
| Gm2933      | 0.00 | 0.00 | 0.00 | 1.00E+00 | no |
| Gm3002      | 0.00 | 0.00 | 0.00 | 1.00E+00 | no |
| Gm3020,Gm83 | 0.00 | 0.00 | 0.00 | 1.00E+00 | no |
| Gm3238      | 0.00 | 0.00 | 0.00 | 1.00E+00 | no |
| Gm3285      | 0.00 | 0.00 | 0.00 | 1.00E+00 | no |
| Gm3286      | 0.00 | 0.00 | 0.00 | 1.00E+00 | no |
| Gm3336      | 0.00 | 0.00 | 0.00 | 1.00E+00 | no |
| Gm3428      | 0.00 | 0.00 | 0.00 | 1.00E+00 | no |
| Gm3434      | 0.00 | 0.00 | 0.00 | 1.00E+00 | no |
| Gm362       | 0.00 | 0.00 | 0.00 | 1.00E+00 | no |
| Gm3646      | 0.00 | 0.00 | 0.00 | 1.00E+00 | no |
| Gm3750      | 0.00 | 0.00 | 0.00 | 1.00E+00 | no |
| Gm381       | 0.00 | 0.00 | 0.00 | 1.00E+00 | no |
| Gm382       | 0.00 | 0.00 | 0.00 | 1.00E+00 | no |
| Gm3893      | 0.00 | 0.00 | 0.00 | 1.00E+00 | no |
| Gm3985      | 0.00 | 0.00 | 0.00 | 1.00E+00 | no |
| Gm4027      | 0.00 | 0.00 | 0.00 | 1.00E+00 | no |
| Gm41        | 0.00 | 0.00 | 0.00 | 1.00E+00 | no |
| Gm410       | 0.00 | 0.00 | 0.00 | 1.00E+00 | no |
| Gm4133      | 0.00 | 0.00 | 0.00 | 1.00E+00 | no |
| Gm4141      | 0.00 | 0.00 | 0.00 | 1.00E+00 | no |
| Gm4144      | 0.00 | 0.00 | 0.00 | 1.00E+00 | no |
| Gm4175      | 0.00 | 0.00 | 0.00 | 1.00E+00 | no |
| Gm4177      | 0.00 | 0.00 | 0.00 | 1.00E+00 | no |
| Gm4187      | 0.00 | 0.00 | 0.00 | 1.00E+00 | no |
| Gm4201      | 0.00 | 0.00 | 0.00 | 1.00E+00 | no |
| Gm4216      | 0.00 | 0.00 | 0.00 | 1.00E+00 | no |
| Gm428       | 0.00 | 0.00 | 0.00 | 1.00E+00 | no |
| Gm4297      | 0.00 | 0.00 | 0.00 | 1.00E+00 | no |
| Gm4301      | 0.00 | 0.00 | 0.00 | 1.00E+00 | no |
| Gm4302      | 0.00 | 0.00 | 0.00 | 1.00E+00 | no |
| Gm4303      | 0.00 | 0.00 | 0.00 | 1.00E+00 | no |
| Gm4307      | 0.00 | 0.00 | 0.00 | 1.00E+00 | no |
| Gm4312      | 0.00 | 0.00 | 0.00 | 1.00E+00 | no |
| Gm4340      | 0.00 | 0.00 | 0.00 | 1.00E+00 | no |
| Gm436       | 0.00 | 0.00 | 0.00 | 1.00E+00 | no |

|        |      |      |      |          |    |
|--------|------|------|------|----------|----|
| Gm438  | 0.00 | 0.00 | 0.00 | 1.00E+00 | no |
| Gm44   | 0.00 | 0.00 | 0.00 | 1.00E+00 | no |
| Gm4498 | 0.00 | 0.00 | 0.00 | 1.00E+00 | no |
| Gm4541 | 0.00 | 0.00 | 0.00 | 1.00E+00 | no |
| Gm4710 | 0.00 | 0.00 | 0.00 | 1.00E+00 | no |
| Gm4736 | 0.00 | 0.00 | 0.00 | 1.00E+00 | no |
| Gm4741 | 0.00 | 0.00 | 0.00 | 1.00E+00 | no |
| Gm4745 | 0.00 | 0.00 | 0.00 | 1.00E+00 | no |
| Gm4776 | 0.00 | 0.00 | 0.00 | 1.00E+00 | no |
| Gm4792 | 0.00 | 0.00 | 0.00 | 1.00E+00 | no |
| Gm4794 | 0.00 | 0.00 | 0.00 | 1.00E+00 | no |
| Gm4814 | 0.00 | 0.00 | 0.00 | 1.00E+00 | no |
| Gm4846 | 0.00 | 0.00 | 0.00 | 1.00E+00 | no |
| Gm4847 | 0.00 | 0.00 | 0.00 | 1.00E+00 | no |
| Gm4850 | 0.00 | 0.00 | 0.00 | 1.00E+00 | no |
| Gm4858 | 0.00 | 0.00 | 0.00 | 1.00E+00 | no |
| Gm4861 | 0.00 | 0.00 | 0.00 | 1.00E+00 | no |
| Gm4871 | 0.00 | 0.00 | 0.00 | 1.00E+00 | no |
| Gm4884 | 0.00 | 0.00 | 0.00 | 1.00E+00 | no |
| Gm4894 | 0.00 | 0.00 | 0.00 | 1.00E+00 | no |
| Gm4906 | 0.00 | 0.00 | 0.00 | 1.00E+00 | no |
| Gm4922 | 0.00 | 0.00 | 0.00 | 1.00E+00 | no |
| Gm4926 | 0.00 | 0.00 | 0.00 | 1.00E+00 | no |
| Gm4934 | 0.00 | 0.00 | 0.00 | 1.00E+00 | no |
| Gm4937 | 0.00 | 0.00 | 0.00 | 1.00E+00 | no |
| Gm4952 | 0.00 | 0.00 | 0.00 | 1.00E+00 | no |
| Gm4956 | 0.00 | 0.00 | 0.00 | 1.00E+00 | no |
| Gm4981 | 0.00 | 0.00 | 0.00 | 1.00E+00 | no |
| Gm5    | 0.00 | 0.00 | 0.00 | 1.00E+00 | no |
| Gm5039 | 0.00 | 0.00 | 0.00 | 1.00E+00 | no |
| Gm5082 | 0.00 | 0.00 | 0.00 | 1.00E+00 | no |
| Gm5084 | 0.00 | 0.00 | 0.00 | 1.00E+00 | no |
| Gm5087 | 0.00 | 0.00 | 0.00 | 1.00E+00 | no |
| Gm5089 | 0.00 | 0.00 | 0.00 | 1.00E+00 | no |
| Gm5095 | 0.00 | 0.00 | 0.00 | 1.00E+00 | no |
| Gm5105 | 0.00 | 0.00 | 0.00 | 1.00E+00 | no |
| Gm5114 | 0.00 | 0.00 | 0.00 | 1.00E+00 | no |
| Gm5132 | 0.00 | 0.00 | 0.00 | 1.00E+00 | no |
| Gm5142 | 0.00 | 0.00 | 0.00 | 1.00E+00 | no |
| Gm5156 | 0.00 | 0.00 | 0.00 | 1.00E+00 | no |
| Gm5166 | 0.00 | 0.00 | 0.00 | 1.00E+00 | no |
| Gm5168 | 0.00 | 0.00 | 0.00 | 1.00E+00 | no |

|        |      |      |      |          |    |
|--------|------|------|------|----------|----|
| Gm5169 | 0.00 | 0.00 | 0.00 | 1.00E+00 | no |
| Gm5294 | 0.00 | 0.00 | 0.00 | 1.00E+00 | no |
| Gm5334 | 0.00 | 0.00 | 0.00 | 1.00E+00 | no |
| Gm5346 | 0.00 | 0.00 | 0.00 | 1.00E+00 | no |
| Gm5347 | 0.00 | 0.00 | 0.00 | 1.00E+00 | no |
| Gm5382 | 0.00 | 0.00 | 0.00 | 1.00E+00 | no |
| Gm5409 | 0.00 | 0.00 | 0.00 | 1.00E+00 | no |
| Gm5414 | 0.00 | 0.00 | 0.00 | 1.00E+00 | no |
| Gm5416 | 0.00 | 0.00 | 0.00 | 1.00E+00 | no |
| Gm5458 | 0.00 | 0.00 | 0.00 | 1.00E+00 | no |
| Gm5460 | 0.00 | 0.00 | 0.00 | 1.00E+00 | no |
| Gm5468 | 0.00 | 0.00 | 0.00 | 1.00E+00 | no |
| Gm5476 | 0.00 | 0.00 | 0.00 | 1.00E+00 | no |
| Gm5477 | 0.00 | 0.00 | 0.00 | 1.00E+00 | no |
| Gm5478 | 0.00 | 0.00 | 0.00 | 1.00E+00 | no |
| Gm5485 | 0.00 | 0.00 | 0.00 | 1.00E+00 | no |
| Gm5494 | 0.00 | 0.00 | 0.00 | 1.00E+00 | no |
| Gm5523 | 0.00 | 0.00 | 0.00 | 1.00E+00 | no |
| Gm5538 | 0.00 | 0.00 | 0.00 | 1.00E+00 | no |
| Gm5567 | 0.00 | 0.00 | 0.00 | 1.00E+00 | no |
| Gm5591 | 0.00 | 0.00 | 0.00 | 1.00E+00 | no |
| Gm5607 | 0.00 | 0.00 | 0.00 | 1.00E+00 | no |
| Gm5615 | 0.00 | 0.00 | 0.00 | 1.00E+00 | no |
| Gm5622 | 0.00 | 0.00 | 0.00 | 1.00E+00 | no |
| Gm5627 | 0.00 | 0.00 | 0.00 | 1.00E+00 | no |
| Gm5631 | 0.00 | 0.00 | 0.00 | 1.00E+00 | no |
| Gm5634 | 0.00 | 0.00 | 0.00 | 1.00E+00 | no |
| Gm5635 | 0.00 | 0.00 | 0.00 | 1.00E+00 | no |
| Gm5640 | 0.00 | 0.00 | 0.00 | 1.00E+00 | no |
| Gm5726 | 0.00 | 0.00 | 0.00 | 1.00E+00 | no |
| Gm5728 | 0.00 | 0.00 | 0.00 | 1.00E+00 | no |
| Gm5736 | 0.00 | 0.00 | 0.00 | 1.00E+00 | no |
| Gm5771 | 0.00 | 0.00 | 0.00 | 1.00E+00 | no |
| Gm5797 | 0.00 | 0.00 | 0.00 | 1.00E+00 | no |
| Gm5800 | 0.00 | 0.00 | 0.00 | 1.00E+00 | no |
| Gm581  | 0.00 | 0.00 | 0.00 | 1.00E+00 | no |
| Gm5840 | 0.00 | 0.00 | 0.00 | 1.00E+00 | no |
| Gm5868 | 0.00 | 0.00 | 0.00 | 1.00E+00 | no |
| Gm5878 | 0.00 | 0.00 | 0.00 | 1.00E+00 | no |
| Gm5885 | 0.00 | 0.00 | 0.00 | 1.00E+00 | no |
| Gm5886 | 0.00 | 0.00 | 0.00 | 1.00E+00 | no |
| Gm5891 | 0.00 | 0.00 | 0.00 | 1.00E+00 | no |

|        |      |      |      |          |    |
|--------|------|------|------|----------|----|
| Gm590  | 0.00 | 0.00 | 0.00 | 1.00E+00 | no |
| Gm5916 | 0.00 | 0.00 | 0.00 | 1.00E+00 | no |
| Gm5934 | 0.00 | 0.00 | 0.00 | 1.00E+00 | no |
| Gm5935 | 0.00 | 0.00 | 0.00 | 1.00E+00 | no |
| Gm5936 | 0.00 | 0.00 | 0.00 | 1.00E+00 | no |
| Gm5938 | 0.00 | 0.00 | 0.00 | 1.00E+00 | no |
| Gm5941 | 0.00 | 0.00 | 0.00 | 1.00E+00 | no |
| Gm597  | 0.00 | 0.00 | 0.00 | 1.00E+00 | no |
| Gm6026 | 0.00 | 0.00 | 0.00 | 1.00E+00 | no |
| Gm6040 | 0.00 | 0.00 | 0.00 | 1.00E+00 | no |
| Gm6042 | 0.00 | 0.00 | 0.00 | 1.00E+00 | no |
| Gm606  | 0.00 | 0.00 | 0.00 | 1.00E+00 | no |
| Gm6084 | 0.00 | 0.00 | 0.00 | 1.00E+00 | no |
| Gm609  | 0.00 | 0.00 | 0.00 | 1.00E+00 | no |
| Gm6121 | 0.00 | 0.00 | 0.00 | 1.00E+00 | no |
| Gm6164 | 0.00 | 0.00 | 0.00 | 1.00E+00 | no |
| Gm6289 | 0.00 | 0.00 | 0.00 | 1.00E+00 | no |
| Gm6300 | 0.00 | 0.00 | 0.00 | 1.00E+00 | no |
| Gm6320 | 0.00 | 0.00 | 0.00 | 1.00E+00 | no |
| Gm6406 | 0.00 | 0.00 | 0.00 | 1.00E+00 | no |
| Gm6455 | 0.00 | 0.00 | 0.00 | 1.00E+00 | no |
| Gm6460 | 0.00 | 0.00 | 0.00 | 1.00E+00 | no |
| Gm6588 | 0.00 | 0.00 | 0.00 | 1.00E+00 | no |
| Gm6592 | 0.00 | 0.00 | 0.00 | 1.00E+00 | no |
| Gm6614 | 0.00 | 0.00 | 0.00 | 1.00E+00 | no |
| Gm6696 | 0.00 | 0.00 | 0.00 | 1.00E+00 | no |
| Gm6760 | 0.00 | 0.00 | 0.00 | 1.00E+00 | no |
| Gm6772 | 0.00 | 0.00 | 0.00 | 1.00E+00 | no |
| Gm6792 | 0.00 | 0.00 | 0.00 | 1.00E+00 | no |
| Gm6793 | 0.00 | 0.00 | 0.00 | 1.00E+00 | no |
| Gm6812 | 0.00 | 0.00 | 0.00 | 1.00E+00 | no |
| Gm6878 | 0.00 | 0.00 | 0.00 | 1.00E+00 | no |
| Gm6890 | 0.00 | 0.00 | 0.00 | 1.00E+00 | no |
| Gm6927 | 0.00 | 0.00 | 0.00 | 1.00E+00 | no |
| Gm6938 | 0.00 | 0.00 | 0.00 | 1.00E+00 | no |
| Gm694  | 0.00 | 0.00 | 0.00 | 1.00E+00 | no |
| Gm6985 | 0.00 | 0.00 | 0.00 | 1.00E+00 | no |
| Gm6994 | 0.00 | 0.00 | 0.00 | 1.00E+00 | no |
| Gm7056 | 0.00 | 0.00 | 0.00 | 1.00E+00 | no |
| Gm7073 | 0.00 | 0.00 | 0.00 | 1.00E+00 | no |
| Gm7157 | 0.00 | 0.00 | 0.00 | 1.00E+00 | no |
| Gm7168 | 0.00 | 0.00 | 0.00 | 1.00E+00 | no |

|             |      |      |      |          |    |
|-------------|------|------|------|----------|----|
| Gm7257      | 0.00 | 0.00 | 0.00 | 1.00E+00 | no |
| Gm7271      | 0.00 | 0.00 | 0.00 | 1.00E+00 | no |
| Gm732       | 0.00 | 0.00 | 0.00 | 1.00E+00 | no |
| Gm7325      | 0.00 | 0.00 | 0.00 | 1.00E+00 | no |
| Gm7337      | 0.00 | 0.00 | 0.00 | 1.00E+00 | no |
| Gm749       | 0.00 | 0.00 | 0.00 | 1.00E+00 | no |
| Gm7534      | 0.00 | 0.00 | 0.00 | 1.00E+00 | no |
| Gm7550      | 0.00 | 0.00 | 0.00 | 1.00E+00 | no |
| Gm757       | 0.00 | 0.00 | 0.00 | 1.00E+00 | no |
| Gm7616      | 0.00 | 0.00 | 0.00 | 1.00E+00 | no |
| Gm765       | 0.00 | 0.00 | 0.00 | 1.00E+00 | no |
| Gm7714      | 0.00 | 0.00 | 0.00 | 1.00E+00 | no |
| Gm773       | 0.00 | 0.00 | 0.00 | 1.00E+00 | no |
| Gm7849,Gm78 | 0.00 | 0.00 | 0.00 | 1.00E+00 | no |
| Gm7854      | 0.00 | 0.00 | 0.00 | 1.00E+00 | no |
| Gm7861      | 0.00 | 0.00 | 0.00 | 1.00E+00 | no |
| Gm806       | 0.00 | 0.00 | 0.00 | 1.00E+00 | no |
| Gm813       | 0.00 | 0.00 | 0.00 | 1.00E+00 | no |
| Gm815       | 0.00 | 0.00 | 0.00 | 1.00E+00 | no |
| Gm826       | 0.00 | 0.00 | 0.00 | 1.00E+00 | no |
| Gm8267      | 0.00 | 0.00 | 0.00 | 1.00E+00 | no |
| Gm829       | 0.00 | 0.00 | 0.00 | 1.00E+00 | no |
| Gm833       | 0.00 | 0.00 | 0.00 | 1.00E+00 | no |
| Gm8348      | 0.00 | 0.00 | 0.00 | 1.00E+00 | no |
| Gm839       | 0.00 | 0.00 | 0.00 | 1.00E+00 | no |
| Gm8439      | 0.00 | 0.00 | 0.00 | 1.00E+00 | no |
| Gm853       | 0.00 | 0.00 | 0.00 | 1.00E+00 | no |
| Gm8660      | 0.00 | 0.00 | 0.00 | 1.00E+00 | no |
| Gm8677      | 0.00 | 0.00 | 0.00 | 1.00E+00 | no |
| Gm8693      | 0.00 | 0.00 | 0.00 | 1.00E+00 | no |
| Gm8709      | 0.00 | 0.00 | 0.00 | 1.00E+00 | no |
| Gm8720      | 0.00 | 0.00 | 0.00 | 1.00E+00 | no |
| Gm884       | 0.00 | 0.00 | 0.00 | 1.00E+00 | no |
| Gm8882      | 0.00 | 0.00 | 0.00 | 1.00E+00 | no |
| Gm8883      | 0.00 | 0.00 | 0.00 | 1.00E+00 | no |
| Gm9         | 0.00 | 0.00 | 0.00 | 1.00E+00 | no |
| Gm904       | 0.00 | 0.00 | 0.00 | 1.00E+00 | no |
| Gm906       | 0.00 | 0.00 | 0.00 | 1.00E+00 | no |
| Gm9112      | 0.00 | 0.00 | 0.00 | 1.00E+00 | no |
| Gm9125      | 0.00 | 0.00 | 0.00 | 1.00E+00 | no |
| Gm9268      | 0.00 | 0.00 | 0.00 | 1.00E+00 | no |
| Gm9376      | 0.00 | 0.00 | 0.00 | 1.00E+00 | no |

|         |       |       |      |          |    |
|---------|-------|-------|------|----------|----|
| Gm94    | 0.00  | 0.00  | 0.00 | 1.00E+00 | no |
| Gm9513  | 0.00  | 0.00  | 0.00 | 1.00E+00 | no |
| Gm9524  | 0.00  | 0.00  | 0.00 | 1.00E+00 | no |
| Gm9696  | 0.00  | 0.00  | 0.00 | 1.00E+00 | no |
| Gm97    | 0.00  | 0.00  | 0.00 | 1.00E+00 | no |
| Gm973   | 0.00  | 0.00  | 0.00 | 1.00E+00 | no |
| Gm9758  | 0.00  | 0.00  | 0.00 | 1.00E+00 | no |
| Gm9767  | 0.00  | 0.00  | 0.00 | 1.00E+00 | no |
| Gm9839  | 0.00  | 0.00  | 0.00 | 1.00E+00 | no |
| Gm9871  | 0.00  | 0.00  | 0.00 | 1.00E+00 | no |
| Gm9880  | 0.00  | 0.00  | 0.00 | 1.00E+00 | no |
| Gm9962  | 0.00  | 0.00  | 0.00 | 1.00E+00 | no |
| Gmcl1l  | 0.00  | 0.00  | 0.00 | 1.00E+00 | no |
| Gml     | 0.00  | 0.00  | 0.00 | 1.00E+00 | no |
| Gnat1   | 0.00  | 0.00  | 0.00 | 1.00E+00 | no |
| Gnat3   | 0.00  | 0.00  | 0.00 | 1.00E+00 | no |
| Gng11   | 0.00  | 0.00  | 0.00 | 1.00E+00 | no |
| Gng12   | 6.17  | 7.17  | 0.00 | 1.00E+00 | no |
| Gng7    | 0.00  | 0.00  | 0.00 | 1.00E+00 | no |
| Gngt1   | 0.00  | 0.00  | 0.00 | 1.00E+00 | no |
| Gnrhr   | 0.00  | 0.00  | 0.00 | 1.00E+00 | no |
| Golga7b | 0.00  | 0.00  | 0.00 | 1.00E+00 | no |
| Golt1a  | 0.00  | 0.00  | 0.00 | 1.00E+00 | no |
| Got1l1  | 0.00  | 0.00  | 0.00 | 1.00E+00 | no |
| Gp2     | 0.00  | 0.00  | 0.00 | 1.00E+00 | no |
| Gp6     | 0.00  | 0.00  | 0.00 | 1.00E+00 | no |
| Gpa33   | 0.00  | 0.00  | 0.00 | 1.00E+00 | no |
| Gpbar1  | 0.00  | 0.00  | 0.00 | 1.00E+00 | no |
| Gpc5    | 0.00  | 0.00  | 0.00 | 1.00E+00 | no |
| Gpc6    | 0.00  | 0.00  | 0.00 | 1.00E+00 | no |
| Gpcpd1  | 37.60 | 31.34 | 0.00 | 1.00E+00 | no |
| Gpha2   | 0.00  | 0.00  | 0.00 | 1.00E+00 | no |
| Gpihbp1 | 0.00  | 0.00  | 0.00 | 1.00E+00 | no |
| Gpr101  | 0.00  | 0.00  | 0.00 | 1.00E+00 | no |
| Gpr114  | 0.00  | 0.00  | 0.00 | 1.00E+00 | no |
| Gpr116  | 0.00  | 0.00  | 0.00 | 1.00E+00 | no |
| Gpr119  | 0.00  | 0.00  | 0.00 | 1.00E+00 | no |
| Gpr120  | 0.00  | 0.00  | 0.00 | 1.00E+00 | no |
| Gpr123  | 0.00  | 0.00  | 0.00 | 1.00E+00 | no |
| Gpr135  | 0.00  | 0.00  | 0.00 | 1.00E+00 | no |
| Gpr139  | 0.00  | 0.00  | 0.00 | 1.00E+00 | no |
| Gpr142  | 0.00  | 0.00  | 0.00 | 1.00E+00 | no |

|         |      |      |      |          |    |
|---------|------|------|------|----------|----|
| Gpr143  | 0.00 | 0.00 | 0.00 | 1.00E+00 | no |
| Gpr149  | 0.00 | 0.00 | 0.00 | 1.00E+00 | no |
| Gpr158  | 0.00 | 0.00 | 0.00 | 1.00E+00 | no |
| Gpr165  | 0.00 | 0.00 | 0.00 | 1.00E+00 | no |
| Gpr17   | 0.00 | 0.00 | 0.00 | 1.00E+00 | no |
| Gpr173  | 0.00 | 0.00 | 0.00 | 1.00E+00 | no |
| Gpr26   | 0.00 | 0.00 | 0.00 | 1.00E+00 | no |
| Gpr27   | 0.00 | 0.00 | 0.00 | 1.00E+00 | no |
| Gpr33   | 0.00 | 0.00 | 0.00 | 1.00E+00 | no |
| Gpr3711 | 0.00 | 0.00 | 0.00 | 1.00E+00 | no |
| Gpr39   | 0.00 | 0.00 | 0.00 | 1.00E+00 | no |
| Gpr6    | 0.00 | 0.00 | 0.00 | 1.00E+00 | no |
| Gpr64   | 0.00 | 0.00 | 0.00 | 1.00E+00 | no |
| Gpr81   | 0.00 | 0.00 | 0.00 | 1.00E+00 | no |
| Gpr85   | 0.00 | 0.00 | 0.00 | 1.00E+00 | no |
| Gpr87   | 0.00 | 0.00 | 0.00 | 1.00E+00 | no |
| Gpr88   | 0.00 | 0.00 | 0.00 | 1.00E+00 | no |
| Gpr98   | 0.00 | 0.00 | 0.00 | 1.00E+00 | no |
| Gprc5c  | 0.00 | 0.00 | 0.00 | 1.00E+00 | no |
| Gprc5d  | 0.00 | 0.00 | 0.00 | 1.00E+00 | no |
| Gprc6a  | 0.00 | 0.00 | 0.00 | 1.00E+00 | no |
| Gprin2  | 0.00 | 0.00 | 0.00 | 1.00E+00 | no |
| Gpx3    | 0.00 | 0.00 | 0.00 | 1.00E+00 | no |
| Gpx5    | 0.00 | 0.00 | 0.00 | 1.00E+00 | no |
| Gpx6    | 0.00 | 0.00 | 0.00 | 1.00E+00 | no |
| Gpx8    | 0.00 | 0.00 | 0.00 | 1.00E+00 | no |
| Grem2   | 0.00 | 0.00 | 0.00 | 1.00E+00 | no |
| Gria1   | 0.00 | 0.00 | 0.00 | 1.00E+00 | no |
| Gria4   | 0.00 | 0.00 | 0.00 | 1.00E+00 | no |
| Grid1   | 0.00 | 0.00 | 0.00 | 1.00E+00 | no |
| Grid2   | 0.00 | 0.00 | 0.00 | 1.00E+00 | no |
| Grifin  | 0.00 | 0.00 | 0.00 | 1.00E+00 | no |
| Grik1   | 0.00 | 0.00 | 0.00 | 1.00E+00 | no |
| Grik2   | 0.00 | 0.00 | 0.00 | 1.00E+00 | no |
| Grik3   | 0.00 | 0.00 | 0.00 | 1.00E+00 | no |
| Grin1   | 0.00 | 0.00 | 0.00 | 1.00E+00 | no |
| Grin2a  | 0.00 | 0.00 | 0.00 | 1.00E+00 | no |
| Grin2b  | 0.00 | 0.00 | 0.00 | 1.00E+00 | no |
| Grm1    | 0.00 | 0.00 | 0.00 | 1.00E+00 | no |
| Grm3    | 0.00 | 0.00 | 0.00 | 1.00E+00 | no |
| Grm4    | 0.00 | 0.00 | 0.00 | 1.00E+00 | no |
| Grm5    | 0.00 | 0.00 | 0.00 | 1.00E+00 | no |

|           |       |       |      |          |    |
|-----------|-------|-------|------|----------|----|
| Grm7      | 0.00  | 0.00  | 0.00 | 1.00E+00 | no |
| Grp       | 0.00  | 0.00  | 0.00 | 1.00E+00 | no |
| Grpr      | 0.00  | 0.00  | 0.00 | 1.00E+00 | no |
| Grrp1     | 0.00  | 0.00  | 0.00 | 1.00E+00 | no |
| Grxcr1    | 0.00  | 0.00  | 0.00 | 1.00E+00 | no |
| Grxcr2    | 0.00  | 0.00  | 0.00 | 1.00E+00 | no |
| Gsbs      | 0.00  | 0.00  | 0.00 | 1.00E+00 | no |
| Gsc       | 0.00  | 0.00  | 0.00 | 1.00E+00 | no |
| Gsdma     | 0.00  | 0.00  | 0.00 | 1.00E+00 | no |
| Gsdma2    | 0.00  | 0.00  | 0.00 | 1.00E+00 | no |
| Gsdma3    | 0.00  | 0.00  | 0.00 | 1.00E+00 | no |
| Gsdmc     | 0.00  | 0.00  | 0.00 | 1.00E+00 | no |
| Gsdmc2    | 0.00  | 0.00  | 0.00 | 1.00E+00 | no |
| Gsdmc3    | 0.00  | 0.00  | 0.00 | 1.00E+00 | no |
| Gsdmcl-ps | 0.00  | 0.00  | 0.00 | 1.00E+00 | no |
| Gsdmcl1   | 0.00  | 0.00  | 0.00 | 1.00E+00 | no |
| Gspt1     | 35.98 | 28.14 | 0.00 | 1.00E+00 | no |
| Gsta2     | 0.00  | 0.00  | 0.00 | 1.00E+00 | no |
| Gsta3     | 0.00  | 0.00  | 0.00 | 1.00E+00 | no |
| Gstm6     | 0.00  | 0.00  | 0.00 | 1.00E+00 | no |
| Gsx1      | 0.00  | 0.00  | 0.00 | 1.00E+00 | no |
| Gsx2      | 0.00  | 0.00  | 0.00 | 1.00E+00 | no |
| Gtf2i     | 38.66 | 34.20 | 0.00 | 1.00E+00 | no |
| Gtf2ird1  | 5.24  | 9.39  | 0.00 | 1.00E+00 | no |
| Guca2a    | 0.00  | 0.00  | 0.00 | 1.00E+00 | no |
| Gucy1a2   | 0.00  | 0.00  | 0.00 | 1.00E+00 | no |
| Gucy1b3   | 0.00  | 0.00  | 0.00 | 1.00E+00 | no |
| Gucy2c    | 0.00  | 0.00  | 0.00 | 1.00E+00 | no |
| Gucy2d    | 0.00  | 0.00  | 0.00 | 1.00E+00 | no |
| Gucy2e    | 0.00  | 0.00  | 0.00 | 1.00E+00 | no |
| Gucy2f    | 0.00  | 0.00  | 0.00 | 1.00E+00 | no |
| Gxylt2    | 0.00  | 0.00  | 0.00 | 1.00E+00 | no |
| Gykl1     | 0.00  | 0.00  | 0.00 | 1.00E+00 | no |
| Gzmc      | 0.00  | 0.00  | 0.00 | 1.00E+00 | no |
| Gzmd      | 0.00  | 0.00  | 0.00 | 1.00E+00 | no |
| Gzme      | 0.00  | 0.00  | 0.00 | 1.00E+00 | no |
| Gzmf      | 0.00  | 0.00  | 0.00 | 1.00E+00 | no |
| Gzmg      | 0.00  | 0.00  | 0.00 | 1.00E+00 | no |
| Gzmk      | 0.00  | 0.00  | 0.00 | 1.00E+00 | no |
| Gzmn      | 0.00  | 0.00  | 0.00 | 1.00E+00 | no |
| H1fnt     | 0.00  | 0.00  | 0.00 | 1.00E+00 | no |
| H2-BI     | 0.00  | 0.00  | 0.00 | 1.00E+00 | no |



|          |        |        |      |          |    |
|----------|--------|--------|------|----------|----|
| H2-Ea-ps | 0.00   | 0.00   | 0.00 | 1.00E+00 | no |
| H2-M1    | 0.00   | 0.00   | 0.00 | 1.00E+00 | no |
| H2-M10.1 | 0.00   | 0.00   | 0.00 | 1.00E+00 | no |
| H2-M10.3 | 0.00   | 0.00   | 0.00 | 1.00E+00 | no |
| H2-M10.4 | 0.00   | 0.00   | 0.00 | 1.00E+00 | no |
| H2-M10.5 | 0.00   | 0.00   | 0.00 | 1.00E+00 | no |
| H2-M11   | 0.00   | 0.00   | 0.00 | 1.00E+00 | no |
| H2-M2    | 0.00   | 0.00   | 0.00 | 1.00E+00 | no |
| H2-M9    | 0.00   | 0.00   | 0.00 | 1.00E+00 | no |
| H28      | 0.00   | 0.00   | 0.00 | 1.00E+00 | no |
| H2afb1   | 0.00   | 0.00   | 0.00 | 1.00E+00 | no |
| H2afy    | 162.33 | 140.26 | 0.00 | 1.00E+00 | no |
| Habp2    | 0.00   | 0.00   | 0.00 | 1.00E+00 | no |
| Hamp2    | 0.00   | 0.00   | 0.00 | 1.00E+00 | no |
| Hand1    | 0.00   | 0.00   | 0.00 | 1.00E+00 | no |
| Hand2    | 0.00   | 0.00   | 0.00 | 1.00E+00 | no |
| Hao1     | 0.00   | 0.00   | 0.00 | 1.00E+00 | no |
| Hao2     | 0.00   | 0.00   | 0.00 | 1.00E+00 | no |
| Hapln1   | 0.00   | 0.00   | 0.00 | 1.00E+00 | no |
| Hapln3   | 0.00   | 0.00   | 0.00 | 1.00E+00 | no |
| Has2     | 0.00   | 0.00   | 0.00 | 1.00E+00 | no |
| Has2as   | 0.00   | 0.00   | 0.00 | 1.00E+00 | no |
| Hba-x    | 0.00   | 0.00   | 0.00 | 1.00E+00 | no |
| Hbb-bh1  | 0.00   | 0.00   | 0.00 | 1.00E+00 | no |
| Hbb-y    | 0.00   | 0.00   | 0.00 | 1.00E+00 | no |
| Hbq1     | 0.00   | 0.00   | 0.00 | 1.00E+00 | no |
| Hcn4     | 0.00   | 0.00   | 0.00 | 1.00E+00 | no |
| Hctr1    | 0.00   | 0.00   | 0.00 | 1.00E+00 | no |
| Hdhd1a   | 0.00   | 0.00   | 0.00 | 1.00E+00 | no |
| Hdx      | 0.00   | 0.00   | 0.00 | 1.00E+00 | no |
| Heatr7b2 | 0.00   | 0.00   | 0.00 | 1.00E+00 | no |
| Hectd2   | 0.00   | 0.00   | 0.00 | 1.00E+00 | no |
| Hecw1    | 0.00   | 0.00   | 0.00 | 1.00E+00 | no |
| Helt     | 0.00   | 0.00   | 0.00 | 1.00E+00 | no |
| Hemt1    | 0.00   | 0.00   | 0.00 | 1.00E+00 | no |
| Heph     | 0.00   | 0.00   | 0.00 | 1.00E+00 | no |
| Heph11   | 0.00   | 0.00   | 0.00 | 1.00E+00 | no |
| Hes2     | 0.00   | 0.00   | 0.00 | 1.00E+00 | no |
| Hhatl    | 0.00   | 0.00   | 0.00 | 1.00E+00 | no |
| Hhip     | 0.00   | 0.00   | 0.00 | 1.00E+00 | no |
| Hhipl1   | 0.00   | 0.00   | 0.00 | 1.00E+00 | no |
| Hhipl2   | 0.00   | 0.00   | 0.00 | 1.00E+00 | no |

|           |        |        |      |          |    |
|-----------|--------|--------|------|----------|----|
| Higd1b    | 0.00   | 0.00   | 0.00 | 1.00E+00 | no |
| Higd1c    | 0.00   | 0.00   | 0.00 | 1.00E+00 | no |
| Hist1h1t  | 0.00   | 0.00   | 0.00 | 1.00E+00 | no |
| Hist1h2aa | 0.00   | 0.00   | 0.00 | 1.00E+00 | no |
| Hist1h2ad | 0.00   | 0.00   | 0.00 | 1.00E+00 | no |
| Hist1h2af | 0.00   | 0.00   | 0.00 | 1.00E+00 | no |
| Hist1h2ah | 0.00   | 0.00   | 0.00 | 1.00E+00 | no |
| Hist1h2ai | 0.00   | 0.00   | 0.00 | 1.00E+00 | no |
| Hist1h2ap | 0.00   | 0.00   | 0.00 | 1.00E+00 | no |
| Hist1h2ba | 0.00   | 0.00   | 0.00 | 1.00E+00 | no |
| Hist1h2bf | 0.00   | 0.00   | 0.00 | 1.00E+00 | no |
| Hist1h2bl | 0.00   | 0.00   | 0.00 | 1.00E+00 | no |
| Hist1h2bm | 0.00   | 0.00   | 0.00 | 1.00E+00 | no |
| Hkdc1     | 0.00   | 0.00   | 0.00 | 1.00E+00 | no |
| Hmga1     | 380.15 | 278.98 | 0.00 | 1.00E+00 | no |
| Hmga1-rs1 | 280.29 | 406.89 | 0.00 | 1.00E+00 | no |
| Hmgb4     | 0.00   | 0.00   | 0.00 | 1.00E+00 | no |
| Hmgcs1    | 0.00   | 0.00   | 0.00 | 1.00E+00 | no |
| Hmx1      | 0.00   | 0.00   | 0.00 | 1.00E+00 | no |
| Hmx3      | 0.00   | 0.00   | 0.00 | 1.00E+00 | no |
| Hnf4g     | 0.00   | 0.00   | 0.00 | 1.00E+00 | no |
| Hnrnpa3   | 76.73  | 65.21  | 0.00 | 1.00E+00 | no |
| Hnrnpd    | 47.56  | 35.75  | 0.00 | 1.00E+00 | no |
| Homer2    | 0.00   | 0.00   | 0.00 | 1.00E+00 | no |
| Hook2     | 3.45   | 7.91   | 0.00 | 1.00E+00 | no |
| Hormad1   | 0.00   | 0.00   | 0.00 | 1.00E+00 | no |
| Hoxa10    | 0.00   | 0.00   | 0.00 | 1.00E+00 | no |
| Hoxa11as  | 0.00   | 0.00   | 0.00 | 1.00E+00 | no |
| Hoxa13    | 0.00   | 0.00   | 0.00 | 1.00E+00 | no |
| Hoxb13    | 0.00   | 0.00   | 0.00 | 1.00E+00 | no |
| Hoxb2     | 0.00   | 0.00   | 0.00 | 1.00E+00 | no |
| Hoxb8     | 0.00   | 0.00   | 0.00 | 1.00E+00 | no |
| Hoxb9     | 0.00   | 0.00   | 0.00 | 1.00E+00 | no |
| Hoxc10    | 0.00   | 0.00   | 0.00 | 1.00E+00 | no |
| Hoxc11    | 0.00   | 0.00   | 0.00 | 1.00E+00 | no |
| Hoxc12    | 0.00   | 0.00   | 0.00 | 1.00E+00 | no |
| Hoxc13    | 0.00   | 0.00   | 0.00 | 1.00E+00 | no |
| Hoxc5     | 0.00   | 0.00   | 0.00 | 1.00E+00 | no |
| Hoxc8     | 0.00   | 0.00   | 0.00 | 1.00E+00 | no |
| Hoxc9     | 0.00   | 0.00   | 0.00 | 1.00E+00 | no |
| Hoxd1     | 0.00   | 0.00   | 0.00 | 1.00E+00 | no |
| Hoxd10    | 0.00   | 0.00   | 0.00 | 1.00E+00 | no |

|          |      |      |      |          |    |
|----------|------|------|------|----------|----|
| Hoxd11   | 0.00 | 0.00 | 0.00 | 1.00E+00 | no |
| Hoxd12   | 0.00 | 0.00 | 0.00 | 1.00E+00 | no |
| Hoxd13   | 0.00 | 0.00 | 0.00 | 1.00E+00 | no |
| Hoxd3    | 0.00 | 0.00 | 0.00 | 1.00E+00 | no |
| Hoxd4    | 0.00 | 0.00 | 0.00 | 1.00E+00 | no |
| Hoxd8    | 0.00 | 0.00 | 0.00 | 1.00E+00 | no |
| Hoxd9    | 0.00 | 0.00 | 0.00 | 1.00E+00 | no |
| Hpcal4   | 0.00 | 0.00 | 0.00 | 1.00E+00 | no |
| Hpd      | 0.00 | 0.00 | 0.00 | 1.00E+00 | no |
| Hpn      | 0.00 | 0.00 | 0.00 | 1.00E+00 | no |
| Hpse2    | 0.00 | 0.00 | 0.00 | 1.00E+00 | no |
| Hrasls   | 0.00 | 0.00 | 0.00 | 1.00E+00 | no |
| Hrasls5  | 0.00 | 0.00 | 0.00 | 1.00E+00 | no |
| Hrct1    | 0.00 | 0.00 | 0.00 | 1.00E+00 | no |
| Hrh3     | 0.00 | 0.00 | 0.00 | 1.00E+00 | no |
| Hrk      | 0.00 | 0.00 | 0.00 | 1.00E+00 | no |
| Hrnrr    | 0.00 | 0.00 | 0.00 | 1.00E+00 | no |
| Hs3st2   | 0.00 | 0.00 | 0.00 | 1.00E+00 | no |
| Hs3st3a1 | 0.02 | 0.00 | 0.00 | 1.00E+00 | no |
| Hs3st5   | 0.00 | 0.00 | 0.00 | 1.00E+00 | no |
| Hs3st6   | 0.00 | 0.00 | 0.00 | 1.00E+00 | no |
| Hs6st2   | 0.00 | 0.00 | 0.00 | 1.00E+00 | no |
| Hs6st3   | 0.00 | 0.00 | 0.00 | 1.00E+00 | no |
| Hsd17b2  | 0.00 | 0.00 | 0.00 | 1.00E+00 | no |
| Hsd17b6  | 0.00 | 0.00 | 0.00 | 1.00E+00 | no |
| Hsd3b1   | 0.00 | 0.00 | 0.00 | 1.00E+00 | no |
| Hsd3b2   | 0.00 | 0.00 | 0.00 | 1.00E+00 | no |
| Hsd3b3   | 0.00 | 0.00 | 0.00 | 1.00E+00 | no |
| Hsd3b4   | 0.00 | 0.00 | 0.00 | 1.00E+00 | no |
| Hsd3b5   | 0.00 | 0.00 | 0.00 | 1.00E+00 | no |
| Hsd3b6   | 0.00 | 0.00 | 0.00 | 1.00E+00 | no |
| Hsf3     | 0.00 | 0.00 | 0.00 | 1.00E+00 | no |
| Hsfy2    | 0.00 | 0.00 | 0.00 | 1.00E+00 | no |
| Hspb3    | 0.00 | 0.00 | 0.00 | 1.00E+00 | no |
| Hspb7    | 0.00 | 0.00 | 0.00 | 1.00E+00 | no |
| Htr1d    | 0.00 | 0.00 | 0.00 | 1.00E+00 | no |
| Htr2c    | 0.00 | 0.00 | 0.00 | 1.00E+00 | no |
| Htr3a    | 0.00 | 0.00 | 0.00 | 1.00E+00 | no |
| Htr3b    | 0.00 | 0.00 | 0.00 | 1.00E+00 | no |
| Htr4     | 0.00 | 0.00 | 0.00 | 1.00E+00 | no |
| Htr5a    | 0.00 | 0.00 | 0.00 | 1.00E+00 | no |
| Htr5b    | 0.00 | 0.00 | 0.00 | 1.00E+00 | no |

|         |      |      |      |          |    |
|---------|------|------|------|----------|----|
| Htr6    | 0.00 | 0.00 | 0.00 | 1.00E+00 | no |
| Htr7    | 0.00 | 0.00 | 0.00 | 1.00E+00 | no |
| Hyal4   | 0.00 | 0.00 | 0.00 | 1.00E+00 | no |
| Hyal5   | 0.00 | 0.00 | 0.00 | 1.00E+00 | no |
| Hyal6   | 0.00 | 0.00 | 0.00 | 1.00E+00 | no |
| Hydin   | 0.00 | 0.00 | 0.00 | 1.00E+00 | no |
| lapp    | 0.00 | 0.00 | 0.00 | 1.00E+00 | no |
| ld4     | 0.00 | 0.00 | 0.00 | 1.00E+00 | no |
| ldi2    | 0.00 | 0.00 | 0.00 | 1.00E+00 | no |
| ldo1    | 0.00 | 0.00 | 0.00 | 1.00E+00 | no |
| ldo2    | 0.00 | 0.00 | 0.00 | 1.00E+00 | no |
| lfi202b | 0.00 | 0.00 | 0.00 | 1.00E+00 | no |
| lfitm7  | 0.00 | 0.00 | 0.00 | 1.00E+00 | no |
| lfltd1  | 0.00 | 0.00 | 0.00 | 1.00E+00 | no |
| lfna1   | 0.00 | 0.00 | 0.00 | 1.00E+00 | no |
| lfna11  | 0.00 | 0.00 | 0.00 | 1.00E+00 | no |
| lfna12  | 0.00 | 0.00 | 0.00 | 1.00E+00 | no |
| lfna13  | 0.00 | 0.00 | 0.00 | 1.00E+00 | no |
| lfna2   | 0.00 | 0.00 | 0.00 | 1.00E+00 | no |
| lfna4   | 0.00 | 0.00 | 0.00 | 1.00E+00 | no |
| lfna5   | 0.00 | 0.00 | 0.00 | 1.00E+00 | no |
| lfna6   | 0.00 | 0.00 | 0.00 | 1.00E+00 | no |
| lfna7   | 0.00 | 0.00 | 0.00 | 1.00E+00 | no |
| lfna9   | 0.00 | 0.00 | 0.00 | 1.00E+00 | no |
| lfnab   | 0.00 | 0.00 | 0.00 | 1.00E+00 | no |
| lfnb1   | 0.00 | 0.00 | 0.00 | 1.00E+00 | no |
| lfne    | 0.00 | 0.00 | 0.00 | 1.00E+00 | no |
| lfnz    | 0.00 | 0.00 | 0.00 | 1.00E+00 | no |
| lgbp1b  | 0.00 | 0.00 | 0.00 | 1.00E+00 | no |
| lgf1    | 0.00 | 0.00 | 0.00 | 1.00E+00 | no |
| lgf2    | 0.00 | 0.00 | 0.00 | 1.00E+00 | no |
| lgf2bp1 | 0.00 | 0.00 | 0.00 | 1.00E+00 | no |
| lgfals  | 0.00 | 0.00 | 0.00 | 1.00E+00 | no |
| lgfbp1  | 0.00 | 0.00 | 0.00 | 1.00E+00 | no |
| lgfbp2  | 0.00 | 0.00 | 0.00 | 1.00E+00 | no |
| lgfbp7  | 0.00 | 0.00 | 0.00 | 1.00E+00 | no |
| lgfbpl1 | 0.00 | 0.00 | 0.00 | 1.00E+00 | no |
| lgfl3   | 0.00 | 0.00 | 0.00 | 1.00E+00 | no |
| lgsf1   | 0.00 | 0.00 | 0.00 | 1.00E+00 | no |
| lgsf21  | 0.00 | 0.00 | 0.00 | 1.00E+00 | no |
| ll10    | 0.00 | 0.00 | 0.00 | 1.00E+00 | no |
| ll12b   | 0.00 | 0.00 | 0.00 | 1.00E+00 | no |

|          |       |       |      |          |    |
|----------|-------|-------|------|----------|----|
| Il13     | 0.00  | 0.00  | 0.00 | 1.00E+00 | no |
| Il13ra2  | 0.00  | 0.00  | 0.00 | 1.00E+00 | no |
| Il17a    | 0.00  | 0.00  | 0.00 | 1.00E+00 | no |
| Il17b    | 0.00  | 0.00  | 0.00 | 1.00E+00 | no |
| Il17d    | 0.00  | 0.00  | 0.00 | 1.00E+00 | no |
| Il17re   | 0.00  | 0.00  | 0.00 | 1.00E+00 | no |
| Il19     | 0.00  | 0.00  | 0.00 | 1.00E+00 | no |
| Il1f10   | 0.00  | 0.00  | 0.00 | 1.00E+00 | no |
| Il1f5    | 0.00  | 0.00  | 0.00 | 1.00E+00 | no |
| Il1f6    | 0.00  | 0.00  | 0.00 | 1.00E+00 | no |
| Il1f8    | 0.00  | 0.00  | 0.00 | 1.00E+00 | no |
| Il1rapl1 | 0.00  | 0.00  | 0.00 | 1.00E+00 | no |
| Il1rn    | 0.00  | 0.00  | 0.00 | 1.00E+00 | no |
| Il2      | 0.00  | 0.00  | 0.00 | 1.00E+00 | no |
| Il20     | 0.00  | 0.00  | 0.00 | 1.00E+00 | no |
| Il21     | 0.00  | 0.00  | 0.00 | 1.00E+00 | no |
| Il22     | 0.00  | 0.00  | 0.00 | 1.00E+00 | no |
| Il22ra1  | 0.00  | 0.00  | 0.00 | 1.00E+00 | no |
| Il23r    | 0.00  | 0.00  | 0.00 | 1.00E+00 | no |
| Il24     | 0.00  | 0.00  | 0.00 | 1.00E+00 | no |
| Il25     | 0.00  | 0.00  | 0.00 | 1.00E+00 | no |
| Il27     | 0.00  | 0.00  | 0.00 | 1.00E+00 | no |
| Il28a    | 0.00  | 0.00  | 0.00 | 1.00E+00 | no |
| Il28b    | 0.00  | 0.00  | 0.00 | 1.00E+00 | no |
| Il3      | 0.00  | 0.00  | 0.00 | 1.00E+00 | no |
| Il31     | 0.00  | 0.00  | 0.00 | 1.00E+00 | no |
| Il34     | 0.00  | 0.00  | 0.00 | 1.00E+00 | no |
| Il4i1    | 0.00  | 0.00  | 0.00 | 1.00E+00 | no |
| Il6      | 0.00  | 0.00  | 0.00 | 1.00E+00 | no |
| Il9      | 0.00  | 0.00  | 0.00 | 1.00E+00 | no |
| Il9r     | 0.00  | 0.00  | 0.00 | 1.00E+00 | no |
| Illdr2   | 0.00  | 0.00  | 0.00 | 1.00E+00 | no |
| Ilf3     | 63.51 | 56.56 | 0.00 | 1.00E+00 | no |
| Iltifb   | 0.00  | 0.00  | 0.00 | 1.00E+00 | no |
| Inha     | 0.00  | 0.00  | 0.00 | 1.00E+00 | no |
| Inhbc    | 0.00  | 0.00  | 0.00 | 1.00E+00 | no |
| Inhbe    | 0.00  | 0.00  | 0.00 | 1.00E+00 | no |
| Inmt     | 0.00  | 0.00  | 0.00 | 1.00E+00 | no |
| Ins1     | 0.00  | 0.00  | 0.00 | 1.00E+00 | no |
| Ins2     | 0.00  | 0.00  | 0.00 | 1.00E+00 | no |
| Insc     | 0.00  | 0.00  | 0.00 | 1.00E+00 | no |
| Insm2    | 0.00  | 0.00  | 0.00 | 1.00E+00 | no |

|                  |      |      |      |          |    |
|------------------|------|------|------|----------|----|
| lp6k3            | 0.00 | 0.00 | 0.00 | 1.00E+00 | no |
| lpw              | 0.00 | 0.00 | 0.00 | 1.00E+00 | no |
| lqca             | 0.00 | 0.00 | 0.00 | 1.00E+00 | no |
| lqcf1            | 0.00 | 0.00 | 0.00 | 1.00E+00 | no |
| lqcf3            | 0.00 | 0.00 | 0.00 | 1.00E+00 | no |
| lqcf4            | 0.00 | 0.00 | 0.00 | 1.00E+00 | no |
| lqcf6            | 0.00 | 0.00 | 0.00 | 1.00E+00 | no |
| lqcj,lqcj-schip1 | 0.00 | 0.00 | 0.00 | 1.00E+00 | no |
| lqcj-schip1      | 0.00 | 0.00 | 0.00 | 1.00E+00 | no |
| lqsec3           | 0.00 | 0.00 | 0.00 | 1.00E+00 | no |
| lrs3             | 0.00 | 0.00 | 0.00 | 1.00E+00 | no |
| lrs4             | 0.00 | 0.00 | 0.00 | 1.00E+00 | no |
| lrx1             | 0.00 | 0.00 | 0.00 | 1.00E+00 | no |
| lrx2             | 0.00 | 0.00 | 0.00 | 1.00E+00 | no |
| lrx3             | 0.00 | 0.00 | 0.00 | 1.00E+00 | no |
| lrx4             | 0.00 | 0.00 | 0.00 | 1.00E+00 | no |
| lrx5             | 0.00 | 0.00 | 0.00 | 1.00E+00 | no |
| lrx6             | 0.00 | 0.00 | 0.00 | 1.00E+00 | no |
| lsl2             | 0.00 | 0.00 | 0.00 | 1.00E+00 | no |
| lsx              | 0.00 | 0.00 | 0.00 | 1.00E+00 | no |
| ltga2            | 0.00 | 0.00 | 0.00 | 1.00E+00 | no |
| ltgb1bp3         | 0.00 | 0.00 | 0.00 | 1.00E+00 | no |
| ltgb5            | 0.31 | 0.00 | 0.00 | 1.00E+00 | no |
| ltgb6            | 0.00 | 0.00 | 0.00 | 1.00E+00 | no |
| ltgbl1           | 0.00 | 0.00 | 0.00 | 1.00E+00 | no |
| ltih1            | 0.00 | 0.00 | 0.00 | 1.00E+00 | no |
| ltih3            | 0.00 | 0.00 | 0.00 | 1.00E+00 | no |
| ltih4            | 0.00 | 0.00 | 0.00 | 1.00E+00 | no |
| lyd              | 0.00 | 0.00 | 0.00 | 1.00E+00 | no |
| lzumo2           | 0.00 | 0.00 | 0.00 | 1.00E+00 | no |
| lzumo3           | 0.00 | 0.00 | 0.00 | 1.00E+00 | no |
| Jakmip2          | 0.00 | 0.00 | 0.00 | 1.00E+00 | no |
| Jazf1            | 0.31 | 0.00 | 0.00 | 1.00E+00 | no |
| Jrkl             | 0.00 | 0.00 | 0.00 | 1.00E+00 | no |
| Kank4            | 0.00 | 0.00 | 0.00 | 1.00E+00 | no |
| Kap              | 0.00 | 0.00 | 0.00 | 1.00E+00 | no |
| Kbtbd5           | 0.00 | 0.00 | 0.00 | 1.00E+00 | no |
| Kcna1            | 0.00 | 0.00 | 0.00 | 1.00E+00 | no |
| Kcna4            | 0.00 | 0.00 | 0.00 | 1.00E+00 | no |
| Kcnb2            | 0.00 | 0.00 | 0.00 | 1.00E+00 | no |
| Kcnc2            | 0.00 | 0.00 | 0.00 | 1.00E+00 | no |
| Kcnc4            | 0.00 | 0.00 | 0.00 | 1.00E+00 | no |

|        |      |      |      |          |    |
|--------|------|------|------|----------|----|
| Kcnd2  | 0.00 | 0.00 | 0.00 | 1.00E+00 | no |
| Kcne11 | 0.00 | 0.00 | 0.00 | 1.00E+00 | no |
| Kcne3  | 0.00 | 0.00 | 0.00 | 1.00E+00 | no |
| Kcne4  | 0.00 | 0.00 | 0.00 | 1.00E+00 | no |
| Kcng4  | 0.00 | 0.00 | 0.00 | 1.00E+00 | no |
| Kcnh1  | 0.00 | 0.00 | 0.00 | 1.00E+00 | no |
| Kcnh5  | 0.00 | 0.00 | 0.00 | 1.00E+00 | no |
| Kcnh7  | 0.00 | 0.00 | 0.00 | 1.00E+00 | no |
| Kcnip2 | 0.00 | 0.00 | 0.00 | 1.00E+00 | no |
| Kcnj12 | 0.00 | 0.00 | 0.00 | 1.00E+00 | no |
| Kcnj15 | 0.00 | 0.00 | 0.00 | 1.00E+00 | no |
| Kcnj3  | 0.00 | 0.00 | 0.00 | 1.00E+00 | no |
| Kcnj4  | 0.00 | 0.00 | 0.00 | 1.00E+00 | no |
| Kcnj6  | 0.00 | 0.00 | 0.00 | 1.00E+00 | no |
| Kcnj8  | 0.00 | 0.00 | 0.00 | 1.00E+00 | no |
| Kcnk1  | 0.00 | 0.00 | 0.00 | 1.00E+00 | no |
| Kcnk13 | 0.68 | 0.00 | 0.00 | 1.00E+00 | no |
| Kcnk15 | 0.00 | 0.00 | 0.00 | 1.00E+00 | no |
| Kcnk18 | 0.00 | 0.00 | 0.00 | 1.00E+00 | no |
| Kcnk2  | 0.00 | 0.00 | 0.00 | 1.00E+00 | no |
| Kcnk9  | 0.00 | 0.00 | 0.00 | 1.00E+00 | no |
| Kcnma1 | 0.00 | 0.00 | 0.00 | 1.00E+00 | no |
| Kcnmb2 | 0.00 | 0.00 | 0.00 | 1.00E+00 | no |
| Kcnn2  | 0.00 | 0.00 | 0.00 | 1.00E+00 | no |
| Kcnn3  | 0.00 | 0.00 | 0.00 | 1.00E+00 | no |
| Kcnq1  | 0.00 | 0.00 | 0.00 | 1.00E+00 | no |
| Kcnq2  | 0.00 | 0.00 | 0.00 | 1.00E+00 | no |
| Kcns1  | 0.00 | 0.00 | 0.00 | 1.00E+00 | no |
| Kcns2  | 0.00 | 0.00 | 0.00 | 1.00E+00 | no |
| Kcnt2  | 0.00 | 0.00 | 0.00 | 1.00E+00 | no |
| Kcnv1  | 0.00 | 0.00 | 0.00 | 1.00E+00 | no |
| Kcnv2  | 0.00 | 0.00 | 0.00 | 1.00E+00 | no |
| Kctd16 | 0.00 | 0.00 | 0.00 | 1.00E+00 | no |
| Kctd8  | 0.00 | 0.00 | 0.00 | 1.00E+00 | no |
| Kdelr3 | 0.00 | 0.00 | 0.00 | 1.00E+00 | no |
| Keg1   | 0.00 | 0.00 | 0.00 | 1.00E+00 | no |
| Kera   | 0.00 | 0.00 | 0.00 | 1.00E+00 | no |
| Khdc1b | 0.00 | 0.00 | 0.00 | 1.00E+00 | no |
| Kif12  | 0.00 | 0.00 | 0.00 | 1.00E+00 | no |
| Kif1a  | 0.00 | 0.00 | 0.00 | 1.00E+00 | no |
| Kif21a | 0.00 | 0.00 | 0.00 | 1.00E+00 | no |
| Kif2b  | 0.00 | 0.00 | 0.00 | 1.00E+00 | no |

|           |      |      |      |          |    |
|-----------|------|------|------|----------|----|
| Kir3dl1   | 0.00 | 0.00 | 0.00 | 1.00E+00 | no |
| Kir3dl2   | 0.00 | 0.00 | 0.00 | 1.00E+00 | no |
| Kirrel    | 0.00 | 0.00 | 0.00 | 1.00E+00 | no |
| Kirrel3   | 0.00 | 0.00 | 0.00 | 1.00E+00 | no |
| Kl        | 0.00 | 0.00 | 0.00 | 1.00E+00 | no |
| Klf14     | 0.00 | 0.00 | 0.00 | 1.00E+00 | no |
| Klhdc7a   | 0.00 | 0.00 | 0.00 | 1.00E+00 | no |
| Klh1      | 0.00 | 0.00 | 0.00 | 1.00E+00 | no |
| Klh13     | 0.00 | 0.00 | 0.00 | 1.00E+00 | no |
| Klh138    | 0.00 | 0.00 | 0.00 | 1.00E+00 | no |
| Klk10     | 0.00 | 0.00 | 0.00 | 1.00E+00 | no |
| Klk11     | 0.00 | 0.00 | 0.00 | 1.00E+00 | no |
| Klk12     | 0.00 | 0.00 | 0.00 | 1.00E+00 | no |
| Klk13     | 0.00 | 0.00 | 0.00 | 1.00E+00 | no |
| Klk14     | 0.00 | 0.00 | 0.00 | 1.00E+00 | no |
| Klk15     | 0.00 | 0.00 | 0.00 | 1.00E+00 | no |
| Klk1b1    | 0.00 | 0.00 | 0.00 | 1.00E+00 | no |
| Klk1b11   | 0.00 | 0.00 | 0.00 | 1.00E+00 | no |
| Klk1b16   | 0.00 | 0.00 | 0.00 | 1.00E+00 | no |
| Klk1b21   | 0.00 | 0.00 | 0.00 | 1.00E+00 | no |
| Klk1b24   | 0.00 | 0.00 | 0.00 | 1.00E+00 | no |
| Klk1b26   | 0.00 | 0.00 | 0.00 | 1.00E+00 | no |
| Klk1b27   | 0.00 | 0.00 | 0.00 | 1.00E+00 | no |
| Klk1b3    | 0.00 | 0.00 | 0.00 | 1.00E+00 | no |
| Klk1b7-ps | 0.00 | 0.00 | 0.00 | 1.00E+00 | no |
| Klk1b8    | 0.00 | 0.00 | 0.00 | 1.00E+00 | no |
| Klk1b9    | 0.00 | 0.00 | 0.00 | 1.00E+00 | no |
| Klk4      | 0.00 | 0.00 | 0.00 | 1.00E+00 | no |
| Klk6      | 0.00 | 0.00 | 0.00 | 1.00E+00 | no |
| Klra10    | 0.00 | 0.00 | 0.00 | 1.00E+00 | no |
| Klra15    | 0.00 | 0.00 | 0.00 | 1.00E+00 | no |
| Klra18    | 0.00 | 0.00 | 0.00 | 1.00E+00 | no |
| Klra19    | 0.00 | 0.00 | 0.00 | 1.00E+00 | no |
| Klra21    | 0.00 | 0.00 | 0.00 | 1.00E+00 | no |
| Klra22    | 0.16 | 0.00 | 0.00 | 1.00E+00 | no |
| Klra23    | 0.00 | 0.00 | 0.00 | 1.00E+00 | no |
| Klra33    | 0.00 | 0.00 | 0.00 | 1.00E+00 | no |
| Klra4     | 0.00 | 0.00 | 0.00 | 1.00E+00 | no |
| Klra5     | 0.00 | 0.00 | 0.00 | 1.00E+00 | no |
| Klra9     | 0.04 | 0.00 | 0.00 | 1.00E+00 | no |
| Klrc1     | 0.00 | 0.00 | 0.00 | 1.00E+00 | no |
| Klrg1     | 0.00 | 0.00 | 0.00 | 1.00E+00 | no |



|          |      |      |      |          |    |
|----------|------|------|------|----------|----|
| Klri1    | 0.00 | 0.00 | 0.00 | 1.00E+00 | no |
| Klrk1    | 0.00 | 0.00 | 0.00 | 1.00E+00 | no |
| Kncn     | 0.00 | 0.00 | 0.00 | 1.00E+00 | no |
| Kng1     | 0.00 | 0.00 | 0.00 | 1.00E+00 | no |
| Kng2     | 0.00 | 0.00 | 0.00 | 1.00E+00 | no |
| Kpna7    | 0.00 | 0.00 | 0.00 | 1.00E+00 | no |
| Krt1     | 0.00 | 0.00 | 0.00 | 1.00E+00 | no |
| Krt12    | 0.00 | 0.00 | 0.00 | 1.00E+00 | no |
| Krt13    | 0.00 | 0.00 | 0.00 | 1.00E+00 | no |
| Krt14    | 0.00 | 0.00 | 0.00 | 1.00E+00 | no |
| Krt15    | 0.00 | 0.00 | 0.00 | 1.00E+00 | no |
| Krt16    | 0.00 | 0.00 | 0.00 | 1.00E+00 | no |
| Krt17    | 0.00 | 0.00 | 0.00 | 1.00E+00 | no |
| Krt19    | 0.00 | 0.00 | 0.00 | 1.00E+00 | no |
| Krt20    | 0.00 | 0.00 | 0.00 | 1.00E+00 | no |
| Krt23    | 0.00 | 0.00 | 0.00 | 1.00E+00 | no |
| Krt24    | 0.00 | 0.00 | 0.00 | 1.00E+00 | no |
| Krt25    | 0.00 | 0.00 | 0.00 | 1.00E+00 | no |
| Krt26    | 0.00 | 0.00 | 0.00 | 1.00E+00 | no |
| Krt27    | 0.00 | 0.00 | 0.00 | 1.00E+00 | no |
| Krt31    | 0.00 | 0.00 | 0.00 | 1.00E+00 | no |
| Krt32    | 0.00 | 0.00 | 0.00 | 1.00E+00 | no |
| Krt33a   | 0.00 | 0.00 | 0.00 | 1.00E+00 | no |
| Krt33b   | 0.00 | 0.00 | 0.00 | 1.00E+00 | no |
| Krt34    | 0.00 | 0.00 | 0.00 | 1.00E+00 | no |
| Krt35    | 0.00 | 0.00 | 0.00 | 1.00E+00 | no |
| Krt36    | 0.00 | 0.00 | 0.00 | 1.00E+00 | no |
| Krt39    | 0.00 | 0.00 | 0.00 | 1.00E+00 | no |
| Krt4     | 0.00 | 0.00 | 0.00 | 1.00E+00 | no |
| Krt40    | 0.00 | 0.00 | 0.00 | 1.00E+00 | no |
| Krt5     | 0.00 | 0.00 | 0.00 | 1.00E+00 | no |
| Krt6a    | 0.00 | 0.00 | 0.00 | 1.00E+00 | no |
| Krt6b    | 0.00 | 0.00 | 0.00 | 1.00E+00 | no |
| Krt71    | 0.00 | 0.00 | 0.00 | 1.00E+00 | no |
| Krt72-ps | 0.00 | 0.00 | 0.00 | 1.00E+00 | no |
| Krt73    | 0.00 | 0.00 | 0.00 | 1.00E+00 | no |
| Krt74    | 0.00 | 0.00 | 0.00 | 1.00E+00 | no |
| Krt75    | 0.00 | 0.00 | 0.00 | 1.00E+00 | no |
| Krt76    | 0.00 | 0.00 | 0.00 | 1.00E+00 | no |
| Krt77    | 0.00 | 0.00 | 0.00 | 1.00E+00 | no |
| Krt78    | 0.00 | 0.00 | 0.00 | 1.00E+00 | no |
| Krt79    | 0.00 | 0.00 | 0.00 | 1.00E+00 | no |

|            |      |      |      |          |    |
|------------|------|------|------|----------|----|
| Krt8       | 0.00 | 0.00 | 0.00 | 1.00E+00 | no |
| Krt84      | 0.00 | 0.00 | 0.00 | 1.00E+00 | no |
| Krt85      | 0.00 | 0.00 | 0.00 | 1.00E+00 | no |
| Krt9       | 0.00 | 0.00 | 0.00 | 1.00E+00 | no |
| Krtap1-3   | 0.00 | 0.00 | 0.00 | 1.00E+00 | no |
| Krtap1-4   | 0.00 | 0.00 | 0.00 | 1.00E+00 | no |
| Krtap1-5   | 0.00 | 0.00 | 0.00 | 1.00E+00 | no |
| Krtap10-10 | 0.00 | 0.00 | 0.00 | 1.00E+00 | no |
| Krtap10-4  | 0.00 | 0.00 | 0.00 | 1.00E+00 | no |
| Krtap11-1  | 0.00 | 0.00 | 0.00 | 1.00E+00 | no |
| Krtap12-1  | 0.00 | 0.00 | 0.00 | 1.00E+00 | no |
| Krtap13    | 0.00 | 0.00 | 0.00 | 1.00E+00 | no |
| Krtap13-1  | 0.00 | 0.00 | 0.00 | 1.00E+00 | no |
| Krtap14    | 0.00 | 0.00 | 0.00 | 1.00E+00 | no |
| Krtap15    | 0.00 | 0.00 | 0.00 | 1.00E+00 | no |
| Krtap16-1  | 0.00 | 0.00 | 0.00 | 1.00E+00 | no |
| Krtap16-10 | 0.00 | 0.00 | 0.00 | 1.00E+00 | no |
| Krtap16-4  | 0.00 | 0.00 | 0.00 | 1.00E+00 | no |
| Krtap16-5  | 0.00 | 0.00 | 0.00 | 1.00E+00 | no |
| Krtap16-8  | 0.00 | 0.00 | 0.00 | 1.00E+00 | no |
| Krtap16-9  | 0.00 | 0.00 | 0.00 | 1.00E+00 | no |
| Krtap17-1  | 0.00 | 0.00 | 0.00 | 1.00E+00 | no |
| Krtap2-4   | 0.00 | 0.00 | 0.00 | 1.00E+00 | no |
| Krtap20-2  | 0.00 | 0.00 | 0.00 | 1.00E+00 | no |
| Krtap22-2  | 0.00 | 0.00 | 0.00 | 1.00E+00 | no |
| Krtap24-1  | 0.00 | 0.00 | 0.00 | 1.00E+00 | no |
| Krtap26-1  | 0.00 | 0.00 | 0.00 | 1.00E+00 | no |
| Krtap27-1  | 0.00 | 0.00 | 0.00 | 1.00E+00 | no |
| Krtap3-1   | 0.00 | 0.00 | 0.00 | 1.00E+00 | no |
| Krtap3-2   | 0.00 | 0.00 | 0.00 | 1.00E+00 | no |
| Krtap3-3   | 0.00 | 0.00 | 0.00 | 1.00E+00 | no |
| Krtap31-1  | 0.00 | 0.00 | 0.00 | 1.00E+00 | no |
| Krtap31-2  | 0.00 | 0.00 | 0.00 | 1.00E+00 | no |
| Krtap4-1   | 0.00 | 0.00 | 0.00 | 1.00E+00 | no |
| Krtap4-13  | 0.00 | 0.00 | 0.00 | 1.00E+00 | no |
| Krtap4-16  | 0.00 | 0.00 | 0.00 | 1.00E+00 | no |
| Krtap4-2   | 0.00 | 0.00 | 0.00 | 1.00E+00 | no |
| Krtap4-6   | 0.00 | 0.00 | 0.00 | 1.00E+00 | no |
| Krtap4-7   | 0.00 | 0.00 | 0.00 | 1.00E+00 | no |
| Krtap4-8   | 0.00 | 0.00 | 0.00 | 1.00E+00 | no |
| Krtap4-9   | 0.00 | 0.00 | 0.00 | 1.00E+00 | no |
| Krtap5-1   | 0.00 | 0.00 | 0.00 | 1.00E+00 | no |

|              |      |      |      |          |    |
|--------------|------|------|------|----------|----|
| Krtap5-2     | 0.00 | 0.00 | 0.00 | 1.00E+00 | no |
| Krtap5-3     | 0.00 | 0.00 | 0.00 | 1.00E+00 | no |
| Krtap5-4     | 0.00 | 0.00 | 0.00 | 1.00E+00 | no |
| Krtap5-5     | 0.00 | 0.00 | 0.00 | 1.00E+00 | no |
| Krtap6-1     | 0.00 | 0.00 | 0.00 | 1.00E+00 | no |
| Krtap6-2     | 0.00 | 0.00 | 0.00 | 1.00E+00 | no |
| Krtap7-1     | 0.00 | 0.00 | 0.00 | 1.00E+00 | no |
| Krtap8-1     | 0.00 | 0.00 | 0.00 | 1.00E+00 | no |
| Krtap8-2     | 0.00 | 0.00 | 0.00 | 1.00E+00 | no |
| Krtap9-1     | 0.00 | 0.00 | 0.00 | 1.00E+00 | no |
| Krtap9-3     | 0.00 | 0.00 | 0.00 | 1.00E+00 | no |
| Krtap9-5     | 0.00 | 0.00 | 0.00 | 1.00E+00 | no |
| Krtdap       | 0.00 | 0.00 | 0.00 | 1.00E+00 | no |
| Ky           | 0.00 | 0.00 | 0.00 | 1.00E+00 | no |
| L3mbtl4      | 0.00 | 0.00 | 0.00 | 1.00E+00 | no |
| LOC100009614 | 0.00 | 0.00 | 0.00 | 1.00E+00 | no |
| LOC100039574 | 0.00 | 0.00 | 0.00 | 1.00E+00 | no |
| LOC100039614 | 0.00 | 0.00 | 0.00 | 1.00E+00 | no |
| LOC100039753 | 0.00 | 0.00 | 0.00 | 1.00E+00 | no |
| LOC100039810 | 0.00 | 0.00 | 0.00 | 1.00E+00 | no |
| LOC100040022 | 0.00 | 0.00 | 0.00 | 1.00E+00 | no |
| LOC100040031 | 0.00 | 0.00 | 0.00 | 1.00E+00 | no |
| LOC100040160 | 0.00 | 0.00 | 0.00 | 1.00E+00 | no |
| LOC100040223 | 0.00 | 0.00 | 0.00 | 1.00E+00 | no |
| LOC100040786 | 0.00 | 0.00 | 0.00 | 1.00E+00 | no |
| LOC100040911 | 0.00 | 0.00 | 0.00 | 1.00E+00 | no |
| LOC100041223 | 0.00 | 0.00 | 0.00 | 1.00E+00 | no |
| LOC100041256 | 0.00 | 0.00 | 0.00 | 1.00E+00 | no |
| LOC100041550 | 0.00 | 0.00 | 0.00 | 1.00E+00 | no |
| LOC100042428 | 0.00 | 0.00 | 0.00 | 1.00E+00 | no |
| LOC100043315 | 0.00 | 0.00 | 0.00 | 1.00E+00 | no |
| LOC100048884 | 0.00 | 0.00 | 0.00 | 1.00E+00 | no |
| LOC100048885 | 0.00 | 0.00 | 0.00 | 1.00E+00 | no |
| LOC100233207 | 0.00 | 0.00 | 0.00 | 1.00E+00 | no |
| LOC100271928 | 0.00 | 0.00 | 0.00 | 1.00E+00 | no |
| LOC100302688 | 0.00 | 0.00 | 0.00 | 1.00E+00 | no |
| LOC100415784 | 0.00 | 0.00 | 0.00 | 1.00E+00 | no |
| LOC16697     | 0.00 | 0.00 | 0.00 | 1.00E+00 | no |
| LOC380994    | 0.00 | 0.00 | 0.00 | 1.00E+00 | no |
| LOC382133    | 0.00 | 0.00 | 0.00 | 1.00E+00 | no |
| LOC434960    | 0.00 | 0.00 | 0.00 | 1.00E+00 | no |
| LOC545947    | 0.00 | 0.00 | 0.00 | 1.00E+00 | no |

|           |      |      |      |          |    |
|-----------|------|------|------|----------|----|
| LOC547349 | 0.00 | 0.00 | 0.00 | 1.00E+00 | no |
| LOC664987 | 0.00 | 0.00 | 0.00 | 1.00E+00 | no |
| Lama1     | 0.00 | 0.00 | 0.00 | 1.00E+00 | no |
| Lama2     | 0.00 | 0.00 | 0.00 | 1.00E+00 | no |
| Lamc3     | 0.00 | 0.00 | 0.00 | 1.00E+00 | no |
| Lbx1      | 0.00 | 0.00 | 0.00 | 1.00E+00 | no |
| Lce1a1    | 0.00 | 0.00 | 0.00 | 1.00E+00 | no |
| Lce1a2    | 0.00 | 0.00 | 0.00 | 1.00E+00 | no |
| Lce1b     | 0.00 | 0.00 | 0.00 | 1.00E+00 | no |
| Lce1c     | 0.00 | 0.00 | 0.00 | 1.00E+00 | no |
| Lce1d     | 0.00 | 0.00 | 0.00 | 1.00E+00 | no |
| Lce1e     | 0.00 | 0.00 | 0.00 | 1.00E+00 | no |
| Lce1f     | 0.00 | 0.00 | 0.00 | 1.00E+00 | no |
| Lce1g     | 0.00 | 0.00 | 0.00 | 1.00E+00 | no |
| Lce1h     | 0.00 | 0.00 | 0.00 | 1.00E+00 | no |
| Lce1i     | 0.00 | 0.00 | 0.00 | 1.00E+00 | no |
| Lce1l     | 0.00 | 0.00 | 0.00 | 1.00E+00 | no |
| Lce1m     | 0.00 | 0.00 | 0.00 | 1.00E+00 | no |
| Lce3a     | 0.00 | 0.00 | 0.00 | 1.00E+00 | no |
| Lce3b     | 0.00 | 0.00 | 0.00 | 1.00E+00 | no |
| Lce3c     | 0.00 | 0.00 | 0.00 | 1.00E+00 | no |
| Lce3f     | 0.00 | 0.00 | 0.00 | 1.00E+00 | no |
| Lce6a     | 0.00 | 0.00 | 0.00 | 1.00E+00 | no |
| Lcn10     | 0.00 | 0.00 | 0.00 | 1.00E+00 | no |
| Lcn11     | 0.00 | 0.00 | 0.00 | 1.00E+00 | no |
| Lcn13     | 0.00 | 0.00 | 0.00 | 1.00E+00 | no |
| Lcn14     | 0.00 | 0.00 | 0.00 | 1.00E+00 | no |
| Lcn3      | 0.00 | 0.00 | 0.00 | 1.00E+00 | no |
| Lcn5      | 0.00 | 0.00 | 0.00 | 1.00E+00 | no |
| Lcn6      | 0.00 | 0.00 | 0.00 | 1.00E+00 | no |
| Lcn8      | 0.00 | 0.00 | 0.00 | 1.00E+00 | no |
| Lcn9      | 0.00 | 0.00 | 0.00 | 1.00E+00 | no |
| Ldb2      | 0.00 | 0.00 | 0.00 | 1.00E+00 | no |
| Ldb3      | 0.00 | 0.00 | 0.00 | 1.00E+00 | no |
| Ldlrad2   | 0.00 | 0.00 | 0.00 | 1.00E+00 | no |
| Ldoc1     | 0.00 | 0.00 | 0.00 | 1.00E+00 | no |
| Lect2     | 0.00 | 0.00 | 0.00 | 1.00E+00 | no |
| Lelp1     | 0.00 | 0.00 | 0.00 | 1.00E+00 | no |
| Lemd1     | 0.00 | 0.00 | 0.00 | 1.00E+00 | no |
| Lep       | 0.00 | 0.00 | 0.00 | 1.00E+00 | no |
| Leprel1   | 0.00 | 0.00 | 0.00 | 1.00E+00 | no |
| Lgals2    | 0.00 | 0.00 | 0.00 | 1.00E+00 | no |

|         |       |       |      |          |    |
|---------|-------|-------|------|----------|----|
| Lgi1    | 0.00  | 0.00  | 0.00 | 1.00E+00 | no |
| Lgi3    | 0.00  | 0.00  | 0.00 | 1.00E+00 | no |
| Lgsn    | 0.00  | 0.00  | 0.00 | 1.00E+00 | no |
| Lhb     | 0.00  | 0.00  | 0.00 | 1.00E+00 | no |
| Lhcgr   | 0.00  | 0.00  | 0.00 | 1.00E+00 | no |
| Lhfp13  | 0.00  | 0.00  | 0.00 | 1.00E+00 | no |
| Lhx3    | 0.00  | 0.00  | 0.00 | 1.00E+00 | no |
| Lhx4    | 0.00  | 0.00  | 0.00 | 1.00E+00 | no |
| Lhx5    | 0.00  | 0.00  | 0.00 | 1.00E+00 | no |
| Lhx6    | 0.00  | 0.00  | 0.00 | 1.00E+00 | no |
| Lhx8    | 0.00  | 0.00  | 0.00 | 1.00E+00 | no |
| Lilra5  | 0.00  | 0.00  | 0.00 | 1.00E+00 | no |
| Lim2    | 0.00  | 0.00  | 0.00 | 1.00E+00 | no |
| Lin7a   | 0.00  | 0.00  | 0.00 | 1.00E+00 | no |
| Lingo2  | 0.00  | 0.00  | 0.00 | 1.00E+00 | no |
| Lingo4  | 0.00  | 0.00  | 0.00 | 1.00E+00 | no |
| Lipa    | 12.06 | 16.51 | 0.00 | 1.00E+00 | no |
| Lipe    | 5.97  | 4.04  | 0.00 | 1.00E+00 | no |
| Lipf    | 0.00  | 0.00  | 0.00 | 1.00E+00 | no |
| Lipi    | 0.00  | 0.00  | 0.00 | 1.00E+00 | no |
| Lipk    | 0.00  | 0.00  | 0.00 | 1.00E+00 | no |
| Lipn    | 0.00  | 0.00  | 0.00 | 1.00E+00 | no |
| Llgl1   | 19.13 | 15.28 | 0.00 | 1.00E+00 | no |
| Lmod1   | 0.00  | 0.00  | 0.00 | 1.00E+00 | no |
| Lmod2   | 0.00  | 0.00  | 0.00 | 1.00E+00 | no |
| Lmx1a   | 0.00  | 0.00  | 0.00 | 1.00E+00 | no |
| Lox     | 0.00  | 0.00  | 0.00 | 1.00E+00 | no |
| Loxl4   | 0.00  | 0.00  | 0.00 | 1.00E+00 | no |
| Lpar3   | 0.00  | 0.00  | 0.00 | 1.00E+00 | no |
| Lpcat2b | 0.00  | 0.00  | 0.00 | 1.00E+00 | no |
| Lpin3   | 0.00  | 0.00  | 0.00 | 1.00E+00 | no |
| Lrfn2   | 0.00  | 0.00  | 0.00 | 1.00E+00 | no |
| Lrfn5   | 0.00  | 0.00  | 0.00 | 1.00E+00 | no |
| Lrit1   | 0.00  | 0.00  | 0.00 | 1.00E+00 | no |
| Lrit2   | 0.00  | 0.00  | 0.00 | 1.00E+00 | no |
| Lrp1b   | 0.00  | 0.00  | 0.00 | 1.00E+00 | no |
| Lrp3    | 0.00  | 0.00  | 0.00 | 1.00E+00 | no |
| Lrrc10  | 0.00  | 0.00  | 0.00 | 1.00E+00 | no |
| Lrrc17  | 0.00  | 0.00  | 0.00 | 1.00E+00 | no |
| Lrrc26  | 0.00  | 0.00  | 0.00 | 1.00E+00 | no |
| Lrrc30  | 0.00  | 0.00  | 0.00 | 1.00E+00 | no |
| Lrrc36  | 0.00  | 0.00  | 0.00 | 1.00E+00 | no |

|           |        |        |      |          |    |
|-----------|--------|--------|------|----------|----|
| Lrrc3b    | 0.00   | 0.00   | 0.00 | 1.00E+00 | no |
| Lrrc43    | 0.00   | 0.00   | 0.00 | 1.00E+00 | no |
| Lrrc55    | 0.00   | 0.00   | 0.00 | 1.00E+00 | no |
| Lrrc6     | 0.00   | 0.00   | 0.00 | 1.00E+00 | no |
| Lrrc69    | 0.00   | 0.00   | 0.00 | 1.00E+00 | no |
| Lrrc7     | 0.00   | 0.00   | 0.00 | 1.00E+00 | no |
| Lrriq1    | 0.00   | 0.00   | 0.00 | 1.00E+00 | no |
| Lrriq4    | 0.00   | 0.00   | 0.00 | 1.00E+00 | no |
| Lrrn1     | 0.00   | 0.00   | 0.00 | 1.00E+00 | no |
| Lrrtm3    | 0.00   | 0.00   | 0.00 | 1.00E+00 | no |
| Lrrtm4    | 0.00   | 0.00   | 0.00 | 1.00E+00 | no |
| Lrtm1     | 0.00   | 0.00   | 0.00 | 1.00E+00 | no |
| Lsamp     | 0.00   | 0.00   | 0.00 | 1.00E+00 | no |
| Lsr       | 0.52   | 0.00   | 0.00 | 1.00E+00 | no |
| Ltbp1     | 0.00   | 0.00   | 0.00 | 1.00E+00 | no |
| Luc7l2    | 87.45  | 75.93  | 0.00 | 1.00E+00 | no |
| Lum       | 0.00   | 0.00   | 0.00 | 1.00E+00 | no |
| Luzp2     | 0.00   | 0.00   | 0.00 | 1.00E+00 | no |
| Luzp4     | 0.00   | 0.00   | 0.00 | 1.00E+00 | no |
| Ly6e      | 240.52 | 306.22 | 0.00 | 1.00E+00 | no |
| Ly6f      | 0.00   | 0.00   | 0.00 | 1.00E+00 | no |
| Ly6g5c    | 0.00   | 0.00   | 0.00 | 1.00E+00 | no |
| Ly6g6c    | 0.00   | 0.00   | 0.00 | 1.00E+00 | no |
| Ly6g6d    | 0.00   | 0.00   | 0.00 | 1.00E+00 | no |
| Ly6g6e    | 0.00   | 0.00   | 0.00 | 1.00E+00 | no |
| Ly6g6f    | 0.00   | 0.00   | 0.00 | 1.00E+00 | no |
| Ly6h      | 0.00   | 0.00   | 0.00 | 1.00E+00 | no |
| Lyg1      | 0.00   | 0.00   | 0.00 | 1.00E+00 | no |
| Lyg2      | 0.00   | 0.00   | 0.00 | 1.00E+00 | no |
| Lypd1     | 0.00   | 0.00   | 0.00 | 1.00E+00 | no |
| Lypd2     | 0.00   | 0.00   | 0.00 | 1.00E+00 | no |
| Lypd4     | 0.00   | 0.00   | 0.00 | 1.00E+00 | no |
| Lypd5     | 0.00   | 0.00   | 0.00 | 1.00E+00 | no |
| Lypd6     | 0.00   | 0.00   | 0.00 | 1.00E+00 | no |
| Lyve1     | 0.00   | 0.00   | 0.00 | 1.00E+00 | no |
| Lyzl1     | 0.00   | 0.00   | 0.00 | 1.00E+00 | no |
| Lyzl6     | 0.00   | 0.00   | 0.00 | 1.00E+00 | no |
| MGC107098 | 0.00   | 0.00   | 0.00 | 1.00E+00 | no |
| Madcam1   | 0.00   | 0.00   | 0.00 | 1.00E+00 | no |
| Mael      | 0.00   | 0.00   | 0.00 | 1.00E+00 | no |
| Magea1    | 0.00   | 0.00   | 0.00 | 1.00E+00 | no |
| Magea10   | 0.00   | 0.00   | 0.00 | 1.00E+00 | no |

|             |       |       |      |          |    |
|-------------|-------|-------|------|----------|----|
| Magea2      | 0.00  | 0.00  | 0.00 | 1.00E+00 | no |
| Magea3      | 0.00  | 0.00  | 0.00 | 1.00E+00 | no |
| Magea4      | 0.00  | 0.00  | 0.00 | 1.00E+00 | no |
| Magea5      | 0.00  | 0.00  | 0.00 | 1.00E+00 | no |
| Magea6      | 0.00  | 0.00  | 0.00 | 1.00E+00 | no |
| Magea8      | 0.00  | 0.00  | 0.00 | 1.00E+00 | no |
| Mageb16     | 0.00  | 0.00  | 0.00 | 1.00E+00 | no |
| Mageb16-ps1 | 0.00  | 0.00  | 0.00 | 1.00E+00 | no |
| Mageb18     | 0.00  | 0.00  | 0.00 | 1.00E+00 | no |
| Mageb4      | 0.00  | 0.00  | 0.00 | 1.00E+00 | no |
| Mageb5      | 0.00  | 0.00  | 0.00 | 1.00E+00 | no |
| Magix       | 0.00  | 0.00  | 0.00 | 1.00E+00 | no |
| Mak         | 0.00  | 0.00  | 0.00 | 1.00E+00 | no |
| Mal         | 0.00  | 0.00  | 0.00 | 1.00E+00 | no |
| Mal2        | 0.00  | 0.00  | 0.00 | 1.00E+00 | no |
| Mall        | 0.00  | 0.00  | 0.00 | 1.00E+00 | no |
| Mamld1      | 0.00  | 0.00  | 0.00 | 1.00E+00 | no |
| Maob        | 0.00  | 0.00  | 0.00 | 1.00E+00 | no |
| Map3k12     | 1.12  | 1.23  | 0.00 | 1.00E+00 | no |
| Mapk10      | 0.00  | 0.00  | 0.00 | 1.00E+00 | no |
| Mapk8ip3    | 19.75 | 20.62 | 0.00 | 1.00E+00 | no |
| Mapk9       | 18.90 | 0.00  | 0.00 | 1.00E+00 | no |
| 10-Mar      | 0.00  | 0.00  | 0.00 | 1.00E+00 | no |
| Marveld3    | 0.00  | 0.00  | 0.00 | 1.00E+00 | no |
| Masp1       | 0.00  | 0.00  | 0.00 | 1.00E+00 | no |
| Mat1a       | 0.00  | 0.00  | 0.00 | 1.00E+00 | no |
| Mb          | 0.00  | 0.00  | 0.00 | 1.00E+00 | no |
| Mbd3l1      | 0.00  | 0.00  | 0.00 | 1.00E+00 | no |
| Mbl1        | 0.00  | 0.00  | 0.00 | 1.00E+00 | no |
| Mbl2        | 0.00  | 0.00  | 0.00 | 1.00E+00 | no |
| Mboat2      | 0.00  | 0.00  | 0.00 | 1.00E+00 | no |
| Mc3r        | 0.00  | 0.00  | 0.00 | 1.00E+00 | no |
| Mc4r        | 0.00  | 0.00  | 0.00 | 1.00E+00 | no |
| Mchr1       | 0.00  | 0.00  | 0.00 | 1.00E+00 | no |
| Mcpt-ps1    | 0.00  | 0.00  | 0.00 | 1.00E+00 | no |
| Mcpt1       | 0.00  | 0.00  | 0.00 | 1.00E+00 | no |
| Mcpt2       | 0.00  | 0.00  | 0.00 | 1.00E+00 | no |
| Mcpt4       | 0.00  | 0.00  | 0.00 | 1.00E+00 | no |
| Mcpt9       | 0.00  | 0.00  | 0.00 | 1.00E+00 | no |
| Mdga2       | 0.00  | 0.00  | 0.00 | 1.00E+00 | no |
| Mdh1b       | 0.00  | 0.00  | 0.00 | 1.00E+00 | no |
| Me1         | 0.00  | 0.00  | 0.00 | 1.00E+00 | no |

|          |       |       |      |          |    |
|----------|-------|-------|------|----------|----|
| Med16    | 20.28 | 17.21 | 0.00 | 1.00E+00 | no |
| Mef2b    | 0.00  | 0.00  | 0.00 | 1.00E+00 | no |
| Mefv     | 0.00  | 0.00  | 0.00 | 1.00E+00 | no |
| Meis2    | 0.00  | 0.00  | 0.00 | 1.00E+00 | no |
| Meox2    | 0.00  | 0.00  | 0.00 | 1.00E+00 | no |
| Mep1a    | 0.00  | 0.00  | 0.00 | 1.00E+00 | no |
| Mep1b    | 0.00  | 0.00  | 0.00 | 1.00E+00 | no |
| Mepe     | 0.00  | 0.00  | 0.00 | 1.00E+00 | no |
| Mesp1    | 0.00  | 0.00  | 0.00 | 1.00E+00 | no |
| Mettl11b | 0.00  | 0.00  | 0.00 | 1.00E+00 | no |
| Mettl7b  | 0.00  | 0.00  | 0.00 | 1.00E+00 | no |
| Mfap3l   | 0.00  | 0.00  | 0.00 | 1.00E+00 | no |
| Mfap4    | 0.00  | 0.00  | 0.00 | 1.00E+00 | no |
| Mgat3    | 0.00  | 0.00  | 0.00 | 1.00E+00 | no |
| Mgat4c   | 0.00  | 0.00  | 0.00 | 1.00E+00 | no |
| Mia2     | 0.00  | 0.00  | 0.00 | 1.00E+00 | no |
| Mia3     | 0.00  | 0.00  | 0.00 | 1.00E+00 | no |
| Miat     | 0.00  | 0.00  | 0.00 | 1.00E+00 | no |
| Mid2     | 0.00  | 0.00  | 0.00 | 1.00E+00 | no |
| Mill1    | 0.00  | 0.00  | 0.00 | 1.00E+00 | no |
| Mill2    | 0.00  | 0.00  | 0.00 | 1.00E+00 | no |
| Mink1    | 12.80 | 17.76 | 0.00 | 1.00E+00 | no |
| Mkx      | 0.00  | 0.00  | 0.00 | 1.00E+00 | no |
| Mlana    | 0.00  | 0.00  | 0.00 | 1.00E+00 | no |
| Mlc1     | 0.00  | 0.00  | 0.00 | 1.00E+00 | no |
| Mlph     | 0.00  | 0.00  | 0.00 | 1.00E+00 | no |
| Mmd2     | 0.00  | 0.00  | 0.00 | 1.00E+00 | no |
| Mme      | 0.00  | 0.00  | 0.00 | 1.00E+00 | no |
| Mmel1    | 0.00  | 0.00  | 0.00 | 1.00E+00 | no |
| Mmp1a    | 0.00  | 0.00  | 0.00 | 1.00E+00 | no |
| Mmp1b    | 0.00  | 0.00  | 0.00 | 1.00E+00 | no |
| Mmp20    | 0.00  | 0.00  | 0.00 | 1.00E+00 | no |
| Mmp24    | 0.00  | 0.00  | 0.00 | 1.00E+00 | no |
| Mmp27    | 0.00  | 0.00  | 0.00 | 1.00E+00 | no |
| Mmp28    | 0.00  | 0.00  | 0.00 | 1.00E+00 | no |
| Mmp7     | 0.00  | 0.00  | 0.00 | 1.00E+00 | no |
| Mmrn2    | 0.00  | 0.00  | 0.00 | 1.00E+00 | no |
| Mnx1     | 0.00  | 0.00  | 0.00 | 1.00E+00 | no |
| Mobp     | 0.00  | 0.00  | 0.00 | 1.00E+00 | no |
| Morc4    | 0.00  | 0.00  | 0.00 | 1.00E+00 | no |
| Morn5    | 0.00  | 0.00  | 0.00 | 1.00E+00 | no |
| Mos      | 0.00  | 0.00  | 0.00 | 1.00E+00 | no |



|         |      |      |      |          |    |
|---------|------|------|------|----------|----|
| Mospd4  | 0.00 | 0.00 | 0.00 | 1.00E+00 | no |
| Mov10I1 | 0.00 | 0.00 | 0.00 | 1.00E+00 | no |
| Moxd1   | 0.00 | 0.00 | 0.00 | 1.00E+00 | no |
| Moxd2   | 0.00 | 0.00 | 0.00 | 1.00E+00 | no |
| Mpl     | 0.00 | 0.00 | 0.00 | 1.00E+00 | no |
| Mpped1  | 0.00 | 0.00 | 0.00 | 1.00E+00 | no |
| Mpped2  | 0.00 | 0.00 | 0.00 | 1.00E+00 | no |
| Mrap    | 0.00 | 0.00 | 0.00 | 1.00E+00 | no |
| Mrap2   | 0.00 | 0.00 | 0.00 | 1.00E+00 | no |
| Mrgpra1 | 0.00 | 0.00 | 0.00 | 1.00E+00 | no |
| Mrgpra3 | 0.00 | 0.00 | 0.00 | 1.00E+00 | no |
| Mrgpra4 | 0.00 | 0.00 | 0.00 | 1.00E+00 | no |
| Mrgprb1 | 0.00 | 0.00 | 0.00 | 1.00E+00 | no |
| Mrgprb2 | 0.00 | 0.00 | 0.00 | 1.00E+00 | no |
| Mrgprb3 | 0.00 | 0.00 | 0.00 | 1.00E+00 | no |
| Mrgprb4 | 0.00 | 0.00 | 0.00 | 1.00E+00 | no |
| Mrgprb5 | 0.00 | 0.00 | 0.00 | 1.00E+00 | no |
| Mrgprb8 | 0.00 | 0.00 | 0.00 | 1.00E+00 | no |
| Mrgprd  | 0.00 | 0.00 | 0.00 | 1.00E+00 | no |
| Mrgprf  | 0.00 | 0.00 | 0.00 | 1.00E+00 | no |
| Mrgprg  | 0.00 | 0.00 | 0.00 | 1.00E+00 | no |
| Mrgprh  | 0.00 | 0.00 | 0.00 | 1.00E+00 | no |
| Mrgprx1 | 0.00 | 0.00 | 0.00 | 1.00E+00 | no |
| Mrgprx2 | 0.00 | 0.00 | 0.00 | 1.00E+00 | no |
| Mro     | 0.00 | 0.00 | 0.00 | 1.00E+00 | no |
| Ms4a10  | 0.00 | 0.00 | 0.00 | 1.00E+00 | no |
| Ms4a13  | 0.00 | 0.00 | 0.00 | 1.00E+00 | no |
| Ms4a15  | 0.00 | 0.00 | 0.00 | 1.00E+00 | no |
| Ms4a5   | 0.00 | 0.00 | 0.00 | 1.00E+00 | no |
| Ms4a7   | 0.00 | 0.00 | 0.00 | 1.00E+00 | no |
| Msc     | 0.00 | 0.00 | 0.00 | 1.00E+00 | no |
| Msln    | 0.00 | 0.00 | 0.00 | 1.00E+00 | no |
| Msemb   | 0.00 | 0.00 | 0.00 | 1.00E+00 | no |
| Mstn    | 0.00 | 0.00 | 0.00 | 1.00E+00 | no |
| Msx1as  | 0.00 | 0.00 | 0.00 | 1.00E+00 | no |
| Msx2    | 0.00 | 0.00 | 0.00 | 1.00E+00 | no |
| Msx3    | 0.00 | 0.00 | 0.00 | 1.00E+00 | no |
| Mt3     | 0.00 | 0.00 | 0.00 | 1.00E+00 | no |
| Mt4     | 0.00 | 0.00 | 0.00 | 1.00E+00 | no |
| Mtag2   | 0.00 | 0.00 | 0.00 | 1.00E+00 | no |
| Mtap6   | 0.00 | 0.00 | 0.00 | 1.00E+00 | no |
| Mtnr1a  | 0.00 | 0.00 | 0.00 | 1.00E+00 | no |

|            |      |      |      |          |    |
|------------|------|------|------|----------|----|
| Mtnr1b     | 0.00 | 0.00 | 0.00 | 1.00E+00 | no |
| Muc15      | 0.00 | 0.00 | 0.00 | 1.00E+00 | no |
| Muc19      | 0.00 | 0.00 | 0.00 | 1.00E+00 | no |
| Muc20      | 0.00 | 0.00 | 0.00 | 1.00E+00 | no |
| Muc5ac     | 0.00 | 0.00 | 0.00 | 1.00E+00 | no |
| Muc11      | 0.00 | 0.00 | 0.00 | 1.00E+00 | no |
| Mug-ps1    | 0.00 | 0.00 | 0.00 | 1.00E+00 | no |
| Mug1       | 0.00 | 0.00 | 0.00 | 1.00E+00 | no |
| Mug2       | 0.00 | 0.00 | 0.00 | 1.00E+00 | no |
| Mup1       | 0.00 | 0.00 | 0.00 | 1.00E+00 | no |
| Mup10      | 0.00 | 0.00 | 0.00 | 1.00E+00 | no |
| Mup11,Mup2 | 0.00 | 0.00 | 0.00 | 1.00E+00 | no |
| Mup12      | 0.00 | 0.00 | 0.00 | 1.00E+00 | no |
| Mup13      | 0.00 | 0.00 | 0.00 | 1.00E+00 | no |
| Mup14      | 0.00 | 0.00 | 0.00 | 1.00E+00 | no |
| Mup15      | 0.00 | 0.00 | 0.00 | 1.00E+00 | no |
| Mup17      | 0.00 | 0.00 | 0.00 | 1.00E+00 | no |
| Mup19      | 0.00 | 0.00 | 0.00 | 1.00E+00 | no |
| Mup2       | 0.00 | 0.00 | 0.00 | 1.00E+00 | no |
| Mup21      | 0.00 | 0.00 | 0.00 | 1.00E+00 | no |
| Mup3       | 0.00 | 0.00 | 0.00 | 1.00E+00 | no |
| Mup4       | 0.00 | 0.00 | 0.00 | 1.00E+00 | no |
| Mup5       | 0.00 | 0.00 | 0.00 | 1.00E+00 | no |
| Mup6       | 0.00 | 0.00 | 0.00 | 1.00E+00 | no |
| Mup7       | 0.00 | 0.00 | 0.00 | 1.00E+00 | no |
| Mup8       | 0.00 | 0.00 | 0.00 | 1.00E+00 | no |
| Mup9       | 0.00 | 0.00 | 0.00 | 1.00E+00 | no |
| Murc       | 0.00 | 0.00 | 0.00 | 1.00E+00 | no |
| Musk       | 0.00 | 0.00 | 0.00 | 1.00E+00 | no |
| Mybphl     | 0.00 | 0.00 | 0.00 | 1.00E+00 | no |
| Mycs       | 0.00 | 0.00 | 0.00 | 1.00E+00 | no |
| Myf5       | 0.00 | 0.00 | 0.00 | 1.00E+00 | no |
| Myf6       | 0.00 | 0.00 | 0.00 | 1.00E+00 | no |
| Myh1       | 0.00 | 0.00 | 0.00 | 1.00E+00 | no |
| Myh11      | 0.00 | 0.00 | 0.00 | 1.00E+00 | no |
| Myh15      | 0.00 | 0.00 | 0.00 | 1.00E+00 | no |
| Myh2       | 0.00 | 0.00 | 0.00 | 1.00E+00 | no |
| Myh4       | 0.00 | 0.00 | 0.00 | 1.00E+00 | no |
| Myh6       | 0.00 | 0.00 | 0.00 | 1.00E+00 | no |
| Myh8       | 0.00 | 0.00 | 0.00 | 1.00E+00 | no |
| Myl1       | 0.00 | 0.00 | 0.00 | 1.00E+00 | no |
| Myl2       | 0.00 | 0.00 | 0.00 | 1.00E+00 | no |

|         |       |       |      |          |    |
|---------|-------|-------|------|----------|----|
| Myl3    | 0.00  | 0.00  | 0.00 | 1.00E+00 | no |
| Myl7    | 0.00  | 0.00  | 0.00 | 1.00E+00 | no |
| Mylk2   | 0.00  | 0.00  | 0.00 | 1.00E+00 | no |
| Myo16   | 0.00  | 0.00  | 0.00 | 1.00E+00 | no |
| Myo1b   | 0.00  | 0.00  | 0.00 | 1.00E+00 | no |
| Myo3a   | 0.00  | 0.00  | 0.00 | 1.00E+00 | no |
| Myo7b   | 0.00  | 0.00  | 0.00 | 1.00E+00 | no |
| Myoc    | 0.00  | 0.00  | 0.00 | 1.00E+00 | no |
| Myocd   | 0.00  | 0.00  | 0.00 | 1.00E+00 | no |
| Myod1   | 0.00  | 0.00  | 0.00 | 1.00E+00 | no |
| Myog    | 0.00  | 0.00  | 0.00 | 1.00E+00 | no |
| Myot    | 0.00  | 0.00  | 0.00 | 1.00E+00 | no |
| Myoz1   | 0.00  | 0.00  | 0.00 | 1.00E+00 | no |
| Myoz2   | 0.00  | 0.00  | 0.00 | 1.00E+00 | no |
| Myrip   | 0.00  | 0.00  | 0.00 | 1.00E+00 | no |
| Myt1    | 0.00  | 0.00  | 0.00 | 1.00E+00 | no |
| Myt1l   | 0.00  | 0.00  | 0.00 | 1.00E+00 | no |
| Nalcn   | 0.00  | 0.00  | 0.00 | 1.00E+00 | no |
| Nanog   | 0.00  | 0.00  | 0.00 | 1.00E+00 | no |
| Nanogpd | 0.00  | 0.00  | 0.00 | 1.00E+00 | no |
| Nanos2  | 0.00  | 0.00  | 0.00 | 1.00E+00 | no |
| Nap1l2  | 0.00  | 0.00  | 0.00 | 1.00E+00 | no |
| Nav3    | 0.00  | 0.00  | 0.00 | 1.00E+00 | no |
| Ncald   | 0.00  | 0.00  | 0.00 | 1.00E+00 | no |
| Ncam2   | 0.00  | 0.00  | 0.00 | 1.00E+00 | no |
| Ncaph2  | 55.49 | 41.05 | 0.00 | 1.00E+00 | no |
| Nccrp1  | 0.00  | 0.00  | 0.00 | 1.00E+00 | no |
| Nctc1   | 0.00  | 0.00  | 0.00 | 1.00E+00 | no |
| Ndrg2   | 0.00  | 0.00  | 0.00 | 1.00E+00 | no |
| Ndrg4   | 0.00  | 0.00  | 0.00 | 1.00E+00 | no |
| Ndst3   | 0.00  | 0.00  | 0.00 | 1.00E+00 | no |
| Necab2  | 0.00  | 0.00  | 0.00 | 1.00E+00 | no |
| Nefl    | 0.00  | 0.00  | 0.00 | 1.00E+00 | no |
| Negr1   | 0.00  | 0.00  | 0.00 | 1.00E+00 | no |
| Nell1   | 0.00  | 0.00  | 0.00 | 1.00E+00 | no |
| Nell2   | 0.00  | 0.00  | 0.00 | 1.00E+00 | no |
| Neo1    | 0.00  | 0.00  | 0.00 | 1.00E+00 | no |
| Neto1   | 0.00  | 0.00  | 0.00 | 1.00E+00 | no |
| Neu2    | 0.00  | 0.00  | 0.00 | 1.00E+00 | no |
| Neu4    | 0.00  | 0.00  | 0.00 | 1.00E+00 | no |
| Neurod1 | 0.00  | 0.00  | 0.00 | 1.00E+00 | no |
| Neurod2 | 0.00  | 0.00  | 0.00 | 1.00E+00 | no |

|           |       |       |      |          |    |
|-----------|-------|-------|------|----------|----|
| Neurod6   | 0.00  | 0.00  | 0.00 | 1.00E+00 | no |
| Neurog1   | 0.00  | 0.00  | 0.00 | 1.00E+00 | no |
| Neurog2   | 0.00  | 0.00  | 0.00 | 1.00E+00 | no |
| Nfasc     | 0.00  | 0.00  | 0.00 | 1.00E+00 | no |
| Nfatc1    | 31.32 | 34.79 | 0.00 | 1.00E+00 | no |
| Nfatc4    | 0.00  | 0.00  | 0.00 | 1.00E+00 | no |
| Nfe2l1    | 20.01 | 22.83 | 0.00 | 1.00E+00 | no |
| Nfib      | 0.00  | 0.00  | 0.00 | 1.00E+00 | no |
| Ngef      | 0.00  | 0.00  | 0.00 | 1.00E+00 | no |
| Ngf       | 0.00  | 0.00  | 0.00 | 1.00E+00 | no |
| Nhlh2     | 0.00  | 0.00  | 0.00 | 1.00E+00 | no |
| Ninj2     | 0.00  | 0.00  | 0.00 | 1.00E+00 | no |
| Nipal2    | 0.00  | 0.00  | 0.00 | 1.00E+00 | no |
| Nipsnap3a | 0.00  | 0.00  | 0.00 | 1.00E+00 | no |
| Nkain2    | 0.00  | 0.00  | 0.00 | 1.00E+00 | no |
| Nkain3    | 0.00  | 0.00  | 0.00 | 1.00E+00 | no |
| Nkain4    | 0.00  | 0.00  | 0.00 | 1.00E+00 | no |
| Nkd1      | 0.29  | 0.00  | 0.00 | 1.00E+00 | no |
| Nkx1-2    | 0.00  | 0.00  | 0.00 | 1.00E+00 | no |
| Nkx2-1    | 0.00  | 0.00  | 0.00 | 1.00E+00 | no |
| Nkx2-2    | 0.00  | 0.00  | 0.00 | 1.00E+00 | no |
| Nkx2-2as  | 0.00  | 0.00  | 0.00 | 1.00E+00 | no |
| Nkx2-3    | 0.00  | 0.00  | 0.00 | 1.00E+00 | no |
| Nkx2-4    | 0.00  | 0.00  | 0.00 | 1.00E+00 | no |
| Nkx2-5    | 0.00  | 0.00  | 0.00 | 1.00E+00 | no |
| Nkx2-6    | 0.00  | 0.00  | 0.00 | 1.00E+00 | no |
| Nkx2-9    | 0.00  | 0.00  | 0.00 | 1.00E+00 | no |
| Nkx3-1    | 0.00  | 0.00  | 0.00 | 1.00E+00 | no |
| Nkx3-2    | 0.00  | 0.00  | 0.00 | 1.00E+00 | no |
| Nkx6-1    | 0.00  | 0.00  | 0.00 | 1.00E+00 | no |
| Nkx6-3    | 0.00  | 0.00  | 0.00 | 1.00E+00 | no |
| Nlgn1     | 0.00  | 0.00  | 0.00 | 1.00E+00 | no |
| Nlrp14    | 0.00  | 0.00  | 0.00 | 1.00E+00 | no |
| Nlrp4a    | 0.00  | 0.00  | 0.00 | 1.00E+00 | no |
| Nlrp4b    | 0.00  | 0.00  | 0.00 | 1.00E+00 | no |
| Nlrp4e    | 0.00  | 0.00  | 0.00 | 1.00E+00 | no |
| Nlrp4f    | 0.00  | 0.00  | 0.00 | 1.00E+00 | no |
| Nlrp4g    | 0.00  | 0.00  | 0.00 | 1.00E+00 | no |
| Nlrp5     | 0.00  | 0.00  | 0.00 | 1.00E+00 | no |
| Nlrp9a    | 0.00  | 0.00  | 0.00 | 1.00E+00 | no |
| Nlrp9b    | 0.00  | 0.00  | 0.00 | 1.00E+00 | no |
| Nlrp9c    | 0.00  | 0.00  | 0.00 | 1.00E+00 | no |

|         |       |       |      |          |    |
|---------|-------|-------|------|----------|----|
| Nme3    | 16.19 | 14.62 | 0.00 | 1.00E+00 | no |
| Nms     | 0.00  | 0.00  | 0.00 | 1.00E+00 | no |
| Nmu     | 0.00  | 0.00  | 0.00 | 1.00E+00 | no |
| Nmur2   | 0.00  | 0.00  | 0.00 | 1.00E+00 | no |
| Nnmt    | 0.00  | 0.00  | 0.00 | 1.00E+00 | no |
| Nol3    | 0.04  | 0.00  | 0.00 | 1.00E+00 | no |
| Nol4    | 0.00  | 0.00  | 0.00 | 1.00E+00 | no |
| Nolc1   | 40.66 | 31.95 | 0.00 | 1.00E+00 | no |
| Nova1   | 0.00  | 0.00  | 0.00 | 1.00E+00 | no |
| Nox3    | 0.00  | 0.00  | 0.00 | 1.00E+00 | no |
| Nox4    | 0.00  | 0.00  | 0.00 | 1.00E+00 | no |
| Noxa1   | 0.00  | 0.00  | 0.00 | 1.00E+00 | no |
| Npas4   | 0.00  | 0.00  | 0.00 | 1.00E+00 | no |
| Npbwr1  | 0.00  | 0.00  | 0.00 | 1.00E+00 | no |
| Npffr1  | 0.00  | 0.00  | 0.00 | 1.00E+00 | no |
| Npffr2  | 0.00  | 0.00  | 0.00 | 1.00E+00 | no |
| Nphs1   | 0.00  | 0.00  | 0.00 | 1.00E+00 | no |
| Nphs1as | 0.00  | 0.00  | 0.00 | 1.00E+00 | no |
| Npnt    | 0.00  | 0.00  | 0.00 | 1.00E+00 | no |
| Nppb    | 0.00  | 0.00  | 0.00 | 1.00E+00 | no |
| Nppc    | 0.00  | 0.00  | 0.00 | 1.00E+00 | no |
| Npr3    | 0.00  | 0.00  | 0.00 | 1.00E+00 | no |
| Nps     | 0.00  | 0.00  | 0.00 | 1.00E+00 | no |
| Npsr1   | 0.00  | 0.00  | 0.00 | 1.00E+00 | no |
| Nptx2   | 0.00  | 0.00  | 0.00 | 1.00E+00 | no |
| Npvf    | 0.00  | 0.00  | 0.00 | 1.00E+00 | no |
| Npy     | 0.00  | 0.00  | 0.00 | 1.00E+00 | no |
| Npy1r   | 0.00  | 0.00  | 0.00 | 1.00E+00 | no |
| Npy2r   | 0.00  | 0.00  | 0.00 | 1.00E+00 | no |
| Npy5r   | 0.00  | 0.00  | 0.00 | 1.00E+00 | no |
| Npy6r   | 0.00  | 0.00  | 0.00 | 1.00E+00 | no |
| Nr0b1   | 0.00  | 0.00  | 0.00 | 1.00E+00 | no |
| Nr0b2   | 0.00  | 0.00  | 0.00 | 1.00E+00 | no |
| Nr1h4   | 0.00  | 0.00  | 0.00 | 1.00E+00 | no |
| Nr1i2   | 0.00  | 0.00  | 0.00 | 1.00E+00 | no |
| Nr2e1   | 0.00  | 0.00  | 0.00 | 1.00E+00 | no |
| Nr2f1   | 0.00  | 0.00  | 0.00 | 1.00E+00 | no |
| Nr2f2   | 0.00  | 0.00  | 0.00 | 1.00E+00 | no |
| Nr5a1   | 0.00  | 0.00  | 0.00 | 1.00E+00 | no |
| Nr5a2   | 0.00  | 0.00  | 0.00 | 1.00E+00 | no |
| Nr6a1   | 0.00  | 0.00  | 0.00 | 1.00E+00 | no |
| Nrap    | 0.00  | 0.00  | 0.00 | 1.00E+00 | no |

|         |      |       |      |          |    |
|---------|------|-------|------|----------|----|
| Nrcam   | 0.00 | 0.00  | 0.00 | 1.00E+00 | no |
| Nrg3    | 0.00 | 0.00  | 0.00 | 1.00E+00 | no |
| Nrk     | 0.00 | 0.00  | 0.00 | 1.00E+00 | no |
| Nrl     | 0.00 | 0.00  | 0.00 | 1.00E+00 | no |
| Nrp2    | 0.00 | 0.00  | 0.00 | 1.00E+00 | no |
| Nrsn1   | 0.00 | 0.00  | 0.00 | 1.00E+00 | no |
| Nrxn1   | 0.00 | 0.00  | 0.00 | 1.00E+00 | no |
| Nrxn3   | 0.00 | 0.00  | 0.00 | 1.00E+00 | no |
| Nt5c1a  | 0.00 | 0.00  | 0.00 | 1.00E+00 | no |
| Nt5c1b  | 0.00 | 0.00  | 0.00 | 1.00E+00 | no |
| Ntf3    | 0.00 | 0.00  | 0.00 | 1.00E+00 | no |
| Ntm     | 0.00 | 0.00  | 0.00 | 1.00E+00 | no |
| Ntng1   | 0.00 | 0.00  | 0.00 | 1.00E+00 | no |
| Ntrk1   | 0.00 | 0.00  | 0.00 | 1.00E+00 | no |
| Ntrk3   | 0.00 | 0.00  | 0.00 | 1.00E+00 | no |
| Nts     | 0.00 | 0.00  | 0.00 | 1.00E+00 | no |
| Ntsr1   | 0.00 | 0.00  | 0.00 | 1.00E+00 | no |
| Ntsr2   | 0.00 | 0.00  | 0.00 | 1.00E+00 | no |
| Nup62cl | 0.00 | 0.00  | 0.00 | 1.00E+00 | no |
| Nxf3    | 0.00 | 0.00  | 0.00 | 1.00E+00 | no |
| Nxph1   | 0.00 | 0.00  | 0.00 | 1.00E+00 | no |
| Nxph3   | 0.00 | 0.00  | 0.00 | 1.00E+00 | no |
| ORF63   | 0.00 | 0.00  | 0.00 | 1.00E+00 | no |
| Oas1b   | 9.79 | 11.21 | 0.00 | 1.00E+00 | no |
| Obox1   | 0.00 | 0.00  | 0.00 | 1.00E+00 | no |
| Obox2   | 0.00 | 0.00  | 0.00 | 1.00E+00 | no |
| Obox3   | 0.00 | 0.00  | 0.00 | 1.00E+00 | no |
| Obox5   | 0.00 | 0.00  | 0.00 | 1.00E+00 | no |
| Obox6   | 0.00 | 0.00  | 0.00 | 1.00E+00 | no |
| Obp1a   | 0.00 | 0.00  | 0.00 | 1.00E+00 | no |
| Oca2    | 0.00 | 0.00  | 0.00 | 1.00E+00 | no |
| Ocln    | 0.00 | 0.00  | 0.00 | 1.00E+00 | no |
| Ocm     | 0.00 | 0.00  | 0.00 | 1.00E+00 | no |
| Odam    | 0.00 | 0.00  | 0.00 | 1.00E+00 | no |
| Odf1    | 0.00 | 0.00  | 0.00 | 1.00E+00 | no |
| Odf3    | 0.00 | 0.00  | 0.00 | 1.00E+00 | no |
| Odf3l1  | 0.00 | 0.00  | 0.00 | 1.00E+00 | no |
| Odf3l2  | 0.00 | 0.00  | 0.00 | 1.00E+00 | no |
| Odf4    | 0.00 | 0.00  | 0.00 | 1.00E+00 | no |
| Odz1    | 0.00 | 0.00  | 0.00 | 1.00E+00 | no |
| Odz2    | 0.00 | 0.00  | 0.00 | 1.00E+00 | no |
| Odz3    | 0.00 | 0.00  | 0.00 | 1.00E+00 | no |

|         |      |      |      |          |    |
|---------|------|------|------|----------|----|
| Ofcc1   | 0.00 | 0.00 | 0.00 | 1.00E+00 | no |
| Oit1    | 0.00 | 0.00 | 0.00 | 1.00E+00 | no |
| Olfm3   | 0.00 | 0.00 | 0.00 | 1.00E+00 | no |
| Olig1   | 0.00 | 0.00 | 0.00 | 1.00E+00 | no |
| Olig2   | 0.00 | 0.00 | 0.00 | 1.00E+00 | no |
| Olig3   | 0.00 | 0.00 | 0.00 | 1.00E+00 | no |
| Omt2a   | 0.00 | 0.00 | 0.00 | 1.00E+00 | no |
| Omt2b   | 0.00 | 0.00 | 0.00 | 1.00E+00 | no |
| Onecut1 | 0.00 | 0.00 | 0.00 | 1.00E+00 | no |
| Onecut2 | 0.00 | 0.00 | 0.00 | 1.00E+00 | no |
| Onecut3 | 0.00 | 0.00 | 0.00 | 1.00E+00 | no |
| Oog1    | 0.00 | 0.00 | 0.00 | 1.00E+00 | no |
| Oog2    | 0.00 | 0.00 | 0.00 | 1.00E+00 | no |
| Oog3    | 0.00 | 0.00 | 0.00 | 1.00E+00 | no |
| Oog4    | 0.00 | 0.00 | 0.00 | 1.00E+00 | no |
| Opalin  | 0.00 | 0.00 | 0.00 | 1.00E+00 | no |
| Opcml   | 0.00 | 0.00 | 0.00 | 1.00E+00 | no |
| Opn1mw  | 0.00 | 0.00 | 0.00 | 1.00E+00 | no |
| Opn4    | 0.00 | 0.00 | 0.00 | 1.00E+00 | no |
| Opn5    | 0.00 | 0.00 | 0.00 | 1.00E+00 | no |
| Oprd1   | 0.00 | 0.00 | 0.00 | 1.00E+00 | no |
| Oprk1   | 0.00 | 0.00 | 0.00 | 1.00E+00 | no |
| Optc    | 0.00 | 0.00 | 0.00 | 1.00E+00 | no |
| Osmr    | 0.00 | 0.00 | 0.00 | 1.00E+00 | no |
| Osr1    | 0.00 | 0.00 | 0.00 | 1.00E+00 | no |
| Osr2    | 0.00 | 0.00 | 0.00 | 1.00E+00 | no |
| Osta    | 0.00 | 0.00 | 0.00 | 1.00E+00 | no |
| Ostb    | 0.00 | 0.00 | 0.00 | 1.00E+00 | no |
| Ostn    | 0.00 | 0.00 | 0.00 | 1.00E+00 | no |
| Otc     | 0.00 | 0.00 | 0.00 | 1.00E+00 | no |
| Otoa    | 0.00 | 0.00 | 0.00 | 1.00E+00 | no |
| Otof    | 0.00 | 0.00 | 0.00 | 1.00E+00 | no |
| Otol1   | 0.00 | 0.00 | 0.00 | 1.00E+00 | no |
| Otop1   | 0.00 | 0.00 | 0.00 | 1.00E+00 | no |
| Otop2   | 0.00 | 0.00 | 0.00 | 1.00E+00 | no |
| Otop3   | 0.00 | 0.00 | 0.00 | 1.00E+00 | no |
| Otor    | 0.00 | 0.00 | 0.00 | 1.00E+00 | no |
| Otp     | 0.00 | 0.00 | 0.00 | 1.00E+00 | no |
| Ott     | 0.00 | 0.00 | 0.00 | 1.00E+00 | no |
| Otud7a  | 0.00 | 0.00 | 0.00 | 1.00E+00 | no |
| Otx1    | 0.00 | 0.00 | 0.00 | 1.00E+00 | no |
| Otx2    | 0.00 | 0.00 | 0.00 | 1.00E+00 | no |

|          |        |       |      |          |    |
|----------|--------|-------|------|----------|----|
| Otx2os1  | 0.00   | 0.00  | 0.00 | 1.00E+00 | no |
| Ovch2    | 0.00   | 0.00  | 0.00 | 1.00E+00 | no |
| Ovol2    | 0.00   | 0.00  | 0.00 | 1.00E+00 | no |
| Oxct2b   | 0.00   | 0.00  | 0.00 | 1.00E+00 | no |
| Oxgr1    | 0.00   | 0.00  | 0.00 | 1.00E+00 | no |
| P2rx6    | 0.00   | 0.00  | 0.00 | 1.00E+00 | no |
| P4ha2    | 0.00   | 0.00  | 0.00 | 1.00E+00 | no |
| Pah      | 0.00   | 0.00  | 0.00 | 1.00E+00 | no |
| Pak3     | 0.00   | 0.00  | 0.00 | 1.00E+00 | no |
| Pak7     | 0.00   | 0.00  | 0.00 | 1.00E+00 | no |
| Palmd    | 0.00   | 0.00  | 0.00 | 1.00E+00 | no |
| Pamr1    | 0.00   | 0.00  | 0.00 | 1.00E+00 | no |
| Panx2    | 0.00   | 0.00  | 0.00 | 1.00E+00 | no |
| Pappa    | 0.00   | 0.00  | 0.00 | 1.00E+00 | no |
| Pate     | 0.00   | 0.00  | 0.00 | 1.00E+00 | no |
| Pate-dj  | 0.00   | 0.00  | 0.00 | 1.00E+00 | no |
| Pate-e   | 0.00   | 0.00  | 0.00 | 1.00E+00 | no |
| Pate-g   | 0.00   | 0.00  | 0.00 | 1.00E+00 | no |
| Pate-n   | 0.00   | 0.00  | 0.00 | 1.00E+00 | no |
| Pax1     | 0.00   | 0.00  | 0.00 | 1.00E+00 | no |
| Pax2     | 0.00   | 0.00  | 0.00 | 1.00E+00 | no |
| Pax3     | 0.00   | 0.00  | 0.00 | 1.00E+00 | no |
| Pax4     | 0.00   | 0.00  | 0.00 | 1.00E+00 | no |
| Pax6os1  | 0.00   | 0.00  | 0.00 | 1.00E+00 | no |
| Pax9     | 0.00   | 0.00  | 0.00 | 1.00E+00 | no |
| Pbp2     | 0.00   | 0.00  | 0.00 | 1.00E+00 | no |
| Pbsn     | 0.00   | 0.00  | 0.00 | 1.00E+00 | no |
| Pcbp2    | 109.59 | 84.87 | 0.00 | 1.00E+00 | no |
| Pcdh10   | 0.00   | 0.00  | 0.00 | 1.00E+00 | no |
| Pcdh15   | 0.00   | 0.00  | 0.00 | 1.00E+00 | no |
| Pcdh18   | 0.00   | 0.00  | 0.00 | 1.00E+00 | no |
| Pcdh19   | 0.00   | 0.00  | 0.00 | 1.00E+00 | no |
| Pcdh20   | 0.00   | 0.00  | 0.00 | 1.00E+00 | no |
| Pcdh8    | 0.00   | 0.00  | 0.00 | 1.00E+00 | no |
| Pcdha1   | 0.00   | 0.00  | 0.00 | 1.00E+00 | no |
| Pcdha11  | 0.00   | 0.00  | 0.00 | 1.00E+00 | no |
| Pcdha12  | 0.00   | 0.00  | 0.00 | 1.00E+00 | no |
| Pcdha2   | 0.00   | 0.00  | 0.00 | 1.00E+00 | no |
| Pcdha3   | 0.00   | 0.00  | 0.00 | 1.00E+00 | no |
| Pcdha4   | 0.00   | 0.00  | 0.00 | 1.00E+00 | no |
| Pcdha4-g | 0.00   | 0.00  | 0.00 | 1.00E+00 | no |
| Pcdha5   | 0.00   | 0.00  | 0.00 | 1.00E+00 | no |



|          |       |       |      |          |    |
|----------|-------|-------|------|----------|----|
| Pcdha7   | 0.01  | 0.00  | 0.00 | 1.00E+00 | no |
| Pcdha8   | 0.00  | 0.00  | 0.00 | 1.00E+00 | no |
| Pcdha9   | 0.00  | 0.00  | 0.00 | 1.00E+00 | no |
| Pcdhac1  | 0.00  | 0.00  | 0.00 | 1.00E+00 | no |
| Pcdhac2  | 0.00  | 0.00  | 0.00 | 1.00E+00 | no |
| Pcdhb1   | 0.00  | 0.00  | 0.00 | 1.00E+00 | no |
| Pcdhb10  | 0.00  | 0.00  | 0.00 | 1.00E+00 | no |
| Pcdhb13  | 0.00  | 0.00  | 0.00 | 1.00E+00 | no |
| Pcdhb14  | 0.01  | 0.00  | 0.00 | 1.00E+00 | no |
| Pcdhb15  | 0.03  | 0.00  | 0.00 | 1.00E+00 | no |
| Pcdhb2   | 0.00  | 0.00  | 0.00 | 1.00E+00 | no |
| Pcdhb3   | 0.01  | 0.00  | 0.00 | 1.00E+00 | no |
| Pcdhb4   | 0.02  | 0.00  | 0.00 | 1.00E+00 | no |
| Pcdhb6   | 0.00  | 0.00  | 0.00 | 1.00E+00 | no |
| Pcdhb8   | 0.00  | 0.00  | 0.00 | 1.00E+00 | no |
| Pcdhb9   | 0.00  | 0.00  | 0.00 | 1.00E+00 | no |
| Pclo     | 0.00  | 0.00  | 0.00 | 1.00E+00 | no |
| Pcolce2  | 0.00  | 0.00  | 0.00 | 1.00E+00 | no |
| Pcsk1    | 0.00  | 0.00  | 0.00 | 1.00E+00 | no |
| Pcsk1n   | 0.00  | 0.00  | 0.00 | 1.00E+00 | no |
| Pcsk2    | 0.00  | 0.00  | 0.00 | 1.00E+00 | no |
| Pdc      | 0.00  | 0.00  | 0.00 | 1.00E+00 | no |
| Pde1a    | 0.00  | 0.00  | 0.00 | 1.00E+00 | no |
| Pde1c    | 0.00  | 0.00  | 0.00 | 1.00E+00 | no |
| Pde6c    | 0.00  | 0.00  | 0.00 | 1.00E+00 | no |
| Pdgfd    | 0.00  | 0.00  | 0.00 | 1.00E+00 | no |
| Pdgfra   | 0.00  | 0.00  | 0.00 | 1.00E+00 | no |
| Pdgfrb   | 0.00  | 0.00  | 0.00 | 1.00E+00 | no |
| Pdgfrl   | 0.00  | 0.00  | 0.00 | 1.00E+00 | no |
| Pdha2    | 0.00  | 0.00  | 0.00 | 1.00E+00 | no |
| Pdilt    | 0.00  | 0.00  | 0.00 | 1.00E+00 | no |
| Pdk4     | 0.00  | 0.00  | 0.00 | 1.00E+00 | no |
| Pdpn     | 0.00  | 0.00  | 0.00 | 1.00E+00 | no |
| Pdx1     | 0.00  | 0.00  | 0.00 | 1.00E+00 | no |
| Pdyn     | 0.00  | 0.00  | 0.00 | 1.00E+00 | no |
| Pdzk1ip1 | 0.00  | 0.00  | 0.00 | 1.00E+00 | no |
| Pea15b   | 0.00  | 0.00  | 0.00 | 1.00E+00 | no |
| Pex13    | 12.46 | 11.35 | 0.00 | 1.00E+00 | no |
| Pex5l    | 0.00  | 0.00  | 0.00 | 1.00E+00 | no |
| Pfn3     | 0.00  | 0.00  | 0.00 | 1.00E+00 | no |
| Pfpl     | 0.00  | 0.00  | 0.00 | 1.00E+00 | no |
| Pga5     | 0.00  | 0.00  | 0.00 | 1.00E+00 | no |

|          |       |        |      |          |    |
|----------|-------|--------|------|----------|----|
| Pgk2     | 0.00  | 0.00   | 0.00 | 1.00E+00 | no |
| Pglyrp3  | 0.00  | 0.00   | 0.00 | 1.00E+00 | no |
| Pglyrp4  | 0.00  | 0.00   | 0.00 | 1.00E+00 | no |
| Pgr15l   | 0.00  | 0.00   | 0.00 | 1.00E+00 | no |
| Phactr1  | 0.00  | 0.00   | 0.00 | 1.00E+00 | no |
| Phactr3  | 0.00  | 0.00   | 0.00 | 1.00E+00 | no |
| Phc3     | 12.99 | 15.71  | 0.00 | 1.00E+00 | no |
| Phgr1    | 0.00  | 0.00   | 0.00 | 1.00E+00 | no |
| Phlda2   | 0.00  | 0.00   | 0.00 | 1.00E+00 | no |
| Phox2a   | 0.00  | 0.00   | 0.00 | 1.00E+00 | no |
| Phox2b   | 0.00  | 0.00   | 0.00 | 1.00E+00 | no |
| Phyhipl  | 0.00  | 0.00   | 0.00 | 1.00E+00 | no |
| Pi15     | 0.00  | 0.00   | 0.00 | 1.00E+00 | no |
| Pias2    | 21.63 | 19.56  | 0.00 | 1.00E+00 | no |
| Pik3c2g  | 0.00  | 0.00   | 0.00 | 1.00E+00 | no |
| Pik3cd   | 72.36 | 161.82 | 0.00 | 1.00E+00 | no |
| Pinc     | 0.00  | 0.00   | 0.00 | 1.00E+00 | no |
| Pip      | 0.00  | 0.00   | 0.00 | 1.00E+00 | no |
| Pira7    | 0.00  | 0.00   | 0.00 | 1.00E+00 | no |
| Pisd-ps1 | 42.53 | 74.74  | 0.00 | 1.00E+00 | no |
| Pisd-ps3 | 4.05  | 7.43   | 0.00 | 1.00E+00 | no |
| Pitpnm3  | 0.00  | 0.00   | 0.00 | 1.00E+00 | no |
| Pitx1    | 0.00  | 0.00   | 0.00 | 1.00E+00 | no |
| Pitx3    | 0.00  | 0.00   | 0.00 | 1.00E+00 | no |
| Piwil1   | 0.00  | 0.00   | 0.00 | 1.00E+00 | no |
| Pkhd1    | 0.00  | 0.00   | 0.00 | 1.00E+00 | no |
| Pklr     | 0.32  | 0.00   | 0.00 | 1.00E+00 | no |
| Pknox2   | 0.00  | 0.00   | 0.00 | 1.00E+00 | no |
| Pkp1     | 0.00  | 0.00   | 0.00 | 1.00E+00 | no |
| Pla2g12b | 0.00  | 0.00   | 0.00 | 1.00E+00 | no |
| Pla2g1b  | 0.00  | 0.00   | 0.00 | 1.00E+00 | no |
| Pla2g2a  | 0.00  | 0.00   | 0.00 | 1.00E+00 | no |
| Pla2g2c  | 0.00  | 0.00   | 0.00 | 1.00E+00 | no |
| Pla2g2e  | 0.00  | 0.00   | 0.00 | 1.00E+00 | no |
| Pla2g2f  | 0.00  | 0.00   | 0.00 | 1.00E+00 | no |
| Pla2g4e  | 0.00  | 0.00   | 0.00 | 1.00E+00 | no |
| Pla2g5   | 0.00  | 0.00   | 0.00 | 1.00E+00 | no |
| Plac1l   | 0.00  | 0.00   | 0.00 | 1.00E+00 | no |
| Plac8l1  | 0.00  | 0.00   | 0.00 | 1.00E+00 | no |
| Plac9    | 0.00  | 0.00   | 0.00 | 1.00E+00 | no |
| Plat     | 0.00  | 0.00   | 0.00 | 1.00E+00 | no |
| Plcb1    | 0.00  | 0.00   | 0.00 | 1.00E+00 | no |

|           |       |       |      |          |    |
|-----------|-------|-------|------|----------|----|
| Plch1     | 0.00  | 0.00  | 0.00 | 1.00E+00 | no |
| Plch2     | 0.00  | 0.00  | 0.00 | 1.00E+00 | no |
| Plcxd3    | 0.00  | 0.00  | 0.00 | 1.00E+00 | no |
| Plcz1     | 0.00  | 0.00  | 0.00 | 1.00E+00 | no |
| Pld1      | 0.00  | 0.00  | 0.00 | 1.00E+00 | no |
| Pld5      | 0.00  | 0.00  | 0.00 | 1.00E+00 | no |
| Pldi      | 0.00  | 0.00  | 0.00 | 1.00E+00 | no |
| Plekhh1   | 0.00  | 0.00  | 0.00 | 1.00E+00 | no |
| Plekhh2   | 0.00  | 0.00  | 0.00 | 1.00E+00 | no |
| Plg       | 0.00  | 0.00  | 0.00 | 1.00E+00 | no |
| Plin1     | 0.00  | 0.00  | 0.00 | 1.00E+00 | no |
| Plin5     | 0.00  | 0.00  | 0.00 | 1.00E+00 | no |
| Plk5      | 0.00  | 0.00  | 0.00 | 1.00E+00 | no |
| Plscr2    | 0.00  | 0.00  | 0.00 | 1.00E+00 | no |
| Plunc     | 0.00  | 0.00  | 0.00 | 1.00E+00 | no |
| Pmfbp1    | 0.00  | 0.00  | 0.00 | 1.00E+00 | no |
| Pmp2      | 0.00  | 0.00  | 0.00 | 1.00E+00 | no |
| Pmp22     | 0.00  | 0.00  | 0.00 | 1.00E+00 | no |
| Pnlip     | 0.00  | 0.00  | 0.00 | 1.00E+00 | no |
| Pnliprp1  | 0.00  | 0.00  | 0.00 | 1.00E+00 | no |
| Pnliprp2  | 0.00  | 0.00  | 0.00 | 1.00E+00 | no |
| Pnma2     | 0.00  | 0.00  | 0.00 | 1.00E+00 | no |
| Pnma5     | 0.00  | 0.00  | 0.00 | 1.00E+00 | no |
| Pnmt      | 0.00  | 0.00  | 0.00 | 1.00E+00 | no |
| Pnoc      | 0.00  | 0.00  | 0.00 | 1.00E+00 | no |
| Pnpla5    | 0.00  | 0.00  | 0.00 | 1.00E+00 | no |
| Podn      | 0.00  | 0.00  | 0.00 | 1.00E+00 | no |
| Pof1b     | 0.00  | 0.00  | 0.00 | 1.00E+00 | no |
| Pom121l12 | 0.00  | 0.00  | 0.00 | 1.00E+00 | no |
| Pon1      | 0.00  | 0.00  | 0.00 | 1.00E+00 | no |
| Popdc2    | 0.00  | 0.00  | 0.00 | 1.00E+00 | no |
| Porcn     | 0.00  | 0.00  | 0.00 | 1.00E+00 | no |
| Postn     | 0.00  | 0.00  | 0.00 | 1.00E+00 | no |
| Poteg     | 0.00  | 0.00  | 0.00 | 1.00E+00 | no |
| Pou2f1    | 21.33 | 14.98 | 0.00 | 1.00E+00 | no |
| Pou2f3    | 0.00  | 0.00  | 0.00 | 1.00E+00 | no |
| Pou3f1    | 0.00  | 0.00  | 0.00 | 1.00E+00 | no |
| Pou3f2    | 0.00  | 0.00  | 0.00 | 1.00E+00 | no |
| Pou3f3    | 0.00  | 0.00  | 0.00 | 1.00E+00 | no |
| Pou3f4    | 0.00  | 0.00  | 0.00 | 1.00E+00 | no |
| Pou4f2    | 0.00  | 0.00  | 0.00 | 1.00E+00 | no |
| Pou4f3    | 0.00  | 0.00  | 0.00 | 1.00E+00 | no |

|               |      |      |      |          |    |
|---------------|------|------|------|----------|----|
| Pou6f2        | 0.00 | 0.00 | 0.00 | 1.00E+00 | no |
| Ppapdc1a      | 0.00 | 0.00 | 0.00 | 1.00E+00 | no |
| Ppara         | 0.00 | 0.00 | 0.00 | 1.00E+00 | no |
| Ppfia2        | 0.00 | 0.00 | 0.00 | 1.00E+00 | no |
| Ppp1r14d      | 0.00 | 0.00 | 0.00 | 1.00E+00 | no |
| Ppp1r1c       | 0.00 | 0.00 | 0.00 | 1.00E+00 | no |
| Ppp1r3a       | 0.00 | 0.00 | 0.00 | 1.00E+00 | no |
| Ppp1r3c       | 0.00 | 0.00 | 0.00 | 1.00E+00 | no |
| Ppp1r3g       | 0.00 | 0.00 | 0.00 | 1.00E+00 | no |
| Ppp2r2b       | 0.00 | 0.00 | 0.00 | 1.00E+00 | no |
| Ppp2r3d       | 0.00 | 0.00 | 0.00 | 1.00E+00 | no |
| Ppp3r2        | 0.00 | 0.00 | 0.00 | 1.00E+00 | no |
| Ppy           | 0.00 | 0.00 | 0.00 | 1.00E+00 | no |
| Ppyr1         | 0.00 | 0.00 | 0.00 | 1.00E+00 | no |
| Prame         | 0.00 | 0.00 | 0.00 | 1.00E+00 | no |
| Pramef17      | 0.00 | 0.00 | 0.00 | 1.00E+00 | no |
| Pramef6       | 0.00 | 0.00 | 0.00 | 1.00E+00 | no |
| Pramel1       | 0.00 | 0.00 | 0.00 | 1.00E+00 | no |
| Pramel4       | 0.00 | 0.00 | 0.00 | 1.00E+00 | no |
| Pramel6       | 0.00 | 0.00 | 0.00 | 1.00E+00 | no |
| Pramel7       | 0.00 | 0.00 | 0.00 | 1.00E+00 | no |
| Prap1         | 0.00 | 0.00 | 0.00 | 1.00E+00 | no |
| Prdm12        | 0.00 | 0.00 | 0.00 | 1.00E+00 | no |
| Prdm13        | 0.00 | 0.00 | 0.00 | 1.00E+00 | no |
| Prdm6         | 0.00 | 0.00 | 0.00 | 1.00E+00 | no |
| Prelp         | 0.00 | 0.00 | 0.00 | 1.00E+00 | no |
| Prh1          | 0.00 | 0.00 | 0.00 | 1.00E+00 | no |
| Prhoxnb       | 0.00 | 0.00 | 0.00 | 1.00E+00 | no |
| Prickle2      | 0.00 | 0.00 | 0.00 | 1.00E+00 | no |
| Prima1        | 0.00 | 0.00 | 0.00 | 1.00E+00 | no |
| Prkcdbp       | 0.00 | 0.00 | 0.00 | 1.00E+00 | no |
| Prkd1         | 0.00 | 0.00 | 0.00 | 1.00E+00 | no |
| Prl           | 0.00 | 0.00 | 0.00 | 1.00E+00 | no |
| Prl2a1        | 0.00 | 0.00 | 0.00 | 1.00E+00 | no |
| Prl2b1        | 0.00 | 0.00 | 0.00 | 1.00E+00 | no |
| Prl2c1        | 0.00 | 0.00 | 0.00 | 1.00E+00 | no |
| Prl2c3,Prl2c4 | 0.00 | 0.00 | 0.00 | 1.00E+00 | no |
| Prl2c4        | 0.00 | 0.00 | 0.00 | 1.00E+00 | no |
| Prl2c5        | 0.00 | 0.00 | 0.00 | 1.00E+00 | no |
| Prl3a1        | 0.00 | 0.00 | 0.00 | 1.00E+00 | no |
| Prl3b1        | 0.00 | 0.00 | 0.00 | 1.00E+00 | no |
| Prl3c1        | 0.00 | 0.00 | 0.00 | 1.00E+00 | no |

|        |      |      |      |          |    |
|--------|------|------|------|----------|----|
| Prl3d1 | 0.00 | 0.00 | 0.00 | 1.00E+00 | no |
| Prl3d2 | 0.00 | 0.00 | 0.00 | 1.00E+00 | no |
| Prl3d3 | 0.00 | 0.00 | 0.00 | 1.00E+00 | no |
| Prl4a1 | 0.00 | 0.00 | 0.00 | 1.00E+00 | no |
| Prl5a1 | 0.00 | 0.00 | 0.00 | 1.00E+00 | no |
| Prl6a1 | 0.00 | 0.00 | 0.00 | 1.00E+00 | no |
| Prl7a1 | 0.00 | 0.00 | 0.00 | 1.00E+00 | no |
| Prl7a2 | 0.00 | 0.00 | 0.00 | 1.00E+00 | no |
| Prl7b1 | 0.00 | 0.00 | 0.00 | 1.00E+00 | no |
| Prl7c1 | 0.00 | 0.00 | 0.00 | 1.00E+00 | no |
| Prl7d1 | 0.00 | 0.00 | 0.00 | 1.00E+00 | no |
| Prl8a1 | 0.00 | 0.00 | 0.00 | 1.00E+00 | no |
| Prl8a2 | 0.00 | 0.00 | 0.00 | 1.00E+00 | no |
| Prl8a6 | 0.00 | 0.00 | 0.00 | 1.00E+00 | no |
| Prl8a8 | 0.00 | 0.00 | 0.00 | 1.00E+00 | no |
| Prl8a9 | 0.00 | 0.00 | 0.00 | 1.00E+00 | no |
| Prlh   | 0.00 | 0.00 | 0.00 | 1.00E+00 | no |
| Prlhr  | 0.00 | 0.00 | 0.00 | 1.00E+00 | no |
| Prm2   | 0.00 | 0.00 | 0.00 | 1.00E+00 | no |
| Prm3   | 0.00 | 0.00 | 0.00 | 1.00E+00 | no |
| Prmt2  | 1.62 | 3.82 | 0.00 | 1.00E+00 | no |
| Proc   | 0.00 | 0.00 | 0.00 | 1.00E+00 | no |
| Prodh2 | 0.00 | 0.00 | 0.00 | 1.00E+00 | no |
| Prok2  | 0.00 | 0.00 | 0.00 | 1.00E+00 | no |
| Prol1  | 0.00 | 0.00 | 0.00 | 1.00E+00 | no |
| Prom2  | 0.00 | 0.00 | 0.00 | 1.00E+00 | no |
| Prop1  | 0.00 | 0.00 | 0.00 | 1.00E+00 | no |
| Prp2   | 0.00 | 0.00 | 0.00 | 1.00E+00 | no |
| Prph   | 0.00 | 0.00 | 0.00 | 1.00E+00 | no |
| Prph2  | 0.00 | 0.00 | 0.00 | 1.00E+00 | no |
| Prpmp5 | 0.00 | 0.00 | 0.00 | 1.00E+00 | no |
| Prr16  | 0.00 | 0.00 | 0.00 | 1.00E+00 | no |
| Prr23a | 0.00 | 0.00 | 0.00 | 1.00E+00 | no |
| Prr9   | 0.00 | 0.00 | 0.00 | 1.00E+00 | no |
| Prrg1  | 0.00 | 0.00 | 0.00 | 1.00E+00 | no |
| Prrg3  | 0.00 | 0.00 | 0.00 | 1.00E+00 | no |
| Prrx1  | 0.00 | 0.00 | 0.00 | 1.00E+00 | no |
| Prrx2  | 0.00 | 0.00 | 0.00 | 1.00E+00 | no |
| Prrxl1 | 0.00 | 0.00 | 0.00 | 1.00E+00 | no |
| Prss1  | 0.00 | 0.00 | 0.00 | 1.00E+00 | no |
| Prss2  | 0.00 | 0.00 | 0.00 | 1.00E+00 | no |
| Prss21 | 0.00 | 0.00 | 0.00 | 1.00E+00 | no |

|         |        |        |      |          |    |
|---------|--------|--------|------|----------|----|
| Prss22  | 0.00   | 0.00   | 0.00 | 1.00E+00 | no |
| Prss28  | 0.00   | 0.00   | 0.00 | 1.00E+00 | no |
| Prss29  | 0.00   | 0.00   | 0.00 | 1.00E+00 | no |
| Prss3   | 0.00   | 0.00   | 0.00 | 1.00E+00 | no |
| Prss32  | 0.00   | 0.00   | 0.00 | 1.00E+00 | no |
| Prss33  | 0.00   | 0.00   | 0.00 | 1.00E+00 | no |
| Prss35  | 0.00   | 0.00   | 0.00 | 1.00E+00 | no |
| Prss37  | 0.00   | 0.00   | 0.00 | 1.00E+00 | no |
| Prss38  | 0.00   | 0.00   | 0.00 | 1.00E+00 | no |
| Prss40  | 0.00   | 0.00   | 0.00 | 1.00E+00 | no |
| Prss41  | 0.00   | 0.00   | 0.00 | 1.00E+00 | no |
| Prss42  | 0.00   | 0.00   | 0.00 | 1.00E+00 | no |
| Prss43  | 0.00   | 0.00   | 0.00 | 1.00E+00 | no |
| Prss46  | 0.00   | 0.00   | 0.00 | 1.00E+00 | no |
| Prss48  | 0.00   | 0.00   | 0.00 | 1.00E+00 | no |
| Prss51  | 0.00   | 0.00   | 0.00 | 1.00E+00 | no |
| Prss54  | 0.00   | 0.00   | 0.00 | 1.00E+00 | no |
| Prss55  | 0.00   | 0.00   | 0.00 | 1.00E+00 | no |
| Psap    | 147.92 | 206.49 | 0.00 | 1.00E+00 | no |
| Psg-ps1 | 0.00   | 0.00   | 0.00 | 1.00E+00 | no |
| Psg16   | 0.00   | 0.00   | 0.00 | 1.00E+00 | no |
| Psg18   | 0.00   | 0.00   | 0.00 | 1.00E+00 | no |
| Psg20   | 0.00   | 0.00   | 0.00 | 1.00E+00 | no |
| Psg21   | 0.00   | 0.00   | 0.00 | 1.00E+00 | no |
| Psg22   | 0.00   | 0.00   | 0.00 | 1.00E+00 | no |
| Psg23   | 0.00   | 0.00   | 0.00 | 1.00E+00 | no |
| Psg25   | 0.00   | 0.00   | 0.00 | 1.00E+00 | no |
| Psg26   | 0.00   | 0.00   | 0.00 | 1.00E+00 | no |
| Psg27   | 0.00   | 0.00   | 0.00 | 1.00E+00 | no |
| Psg28   | 0.00   | 0.00   | 0.00 | 1.00E+00 | no |
| Psg29   | 0.00   | 0.00   | 0.00 | 1.00E+00 | no |
| Psp     | 0.00   | 0.00   | 0.00 | 1.00E+00 | no |
| Ptchd1  | 0.00   | 0.00   | 0.00 | 1.00E+00 | no |
| Ptchd2  | 0.00   | 0.00   | 0.00 | 1.00E+00 | no |
| Ptcra   | 0.00   | 0.00   | 0.00 | 1.00E+00 | no |
| Ptf1a   | 0.00   | 0.00   | 0.00 | 1.00E+00 | no |
| Ptges   | 0.00   | 0.00   | 0.00 | 1.00E+00 | no |
| Ptgr    | 0.00   | 0.00   | 0.00 | 1.00E+00 | no |
| Pth     | 0.00   | 0.00   | 0.00 | 1.00E+00 | no |
| Pth1r   | 0.00   | 0.00   | 0.00 | 1.00E+00 | no |
| Pth2    | 0.00   | 0.00   | 0.00 | 1.00E+00 | no |
| Pthlh   | 0.00   | 0.00   | 0.00 | 1.00E+00 | no |

|          |       |       |      |          |    |
|----------|-------|-------|------|----------|----|
| Ptn      | 0.00  | 0.00  | 0.00 | 1.00E+00 | no |
| Ptpn13   | 0.00  | 0.00  | 0.00 | 1.00E+00 | no |
| Ptpn20   | 0.00  | 0.00  | 0.00 | 1.00E+00 | no |
| Ptpn5    | 0.05  | 0.00  | 0.00 | 1.00E+00 | no |
| Ptprb    | 0.00  | 0.00  | 0.00 | 1.00E+00 | no |
| Ptprd    | 0.00  | 0.00  | 0.00 | 1.00E+00 | no |
| Ptprg    | 0.00  | 0.00  | 0.00 | 1.00E+00 | no |
| Ptprh    | 0.00  | 0.00  | 0.00 | 1.00E+00 | no |
| Ptpro    | 0.26  | 0.00  | 0.00 | 1.00E+00 | no |
| Ptprq    | 0.00  | 0.00  | 0.00 | 1.00E+00 | no |
| Ptprr    | 0.00  | 0.00  | 0.00 | 1.00E+00 | no |
| Ptprt    | 0.00  | 0.00  | 0.00 | 1.00E+00 | no |
| Ptpru    | 0.00  | 0.00  | 0.00 | 1.00E+00 | no |
| Ptprz1   | 0.00  | 0.00  | 0.00 | 1.00E+00 | no |
| Ptx3     | 0.00  | 0.00  | 0.00 | 1.00E+00 | no |
| Ptx4     | 0.00  | 0.00  | 0.00 | 1.00E+00 | no |
| Pum1     | 31.34 | 30.73 | 0.00 | 1.00E+00 | no |
| Pum2     | 87.50 | 71.72 | 0.00 | 1.00E+00 | no |
| Pus10    | 16.14 | 14.93 | 0.00 | 1.00E+00 | no |
| Pvalb    | 0.00  | 0.00  | 0.00 | 1.00E+00 | no |
| Pvrl4    | 0.00  | 0.00  | 0.00 | 1.00E+00 | no |
| Pygo1    | 0.00  | 0.00  | 0.00 | 1.00E+00 | no |
| Pyy      | 0.00  | 0.00  | 0.00 | 1.00E+00 | no |
| Qrfpr    | 0.00  | 0.00  | 0.00 | 1.00E+00 | no |
| Qrich2   | 0.00  | 0.00  | 0.00 | 1.00E+00 | no |
| R3hdml   | 0.00  | 0.00  | 0.00 | 1.00E+00 | no |
| Rab17    | 0.00  | 0.00  | 0.00 | 1.00E+00 | no |
| Rab20    | 0.00  | 0.00  | 0.00 | 1.00E+00 | no |
| Rab27b   | 0.00  | 0.00  | 0.00 | 1.00E+00 | no |
| Rab34    | 0.00  | 0.00  | 0.00 | 1.00E+00 | no |
| Rab9b    | 0.00  | 0.00  | 0.00 | 1.00E+00 | no |
| Rabggtb  | 30.54 | 20.73 | 0.00 | 1.00E+00 | no |
| Rad51ap2 | 0.00  | 0.00  | 0.00 | 1.00E+00 | no |
| Radil    | 0.00  | 0.00  | 0.00 | 1.00E+00 | no |
| Raet1b   | 0.00  | 0.00  | 0.00 | 1.00E+00 | no |
| Raet1c   | 0.00  | 0.00  | 0.00 | 1.00E+00 | no |
| Rai2     | 0.00  | 0.00  | 0.00 | 1.00E+00 | no |
| Ralgapa1 | 16.17 | 15.75 | 0.00 | 1.00E+00 | no |
| Ralyl    | 0.00  | 0.00  | 0.00 | 1.00E+00 | no |
| Rasef    | 0.00  | 0.00  | 0.00 | 1.00E+00 | no |
| Rasgef1b | 0.00  | 0.00  | 0.00 | 1.00E+00 | no |
| Rassf10  | 0.00  | 0.00  | 0.00 | 1.00E+00 | no |

|         |       |       |      |          |    |
|---------|-------|-------|------|----------|----|
| Rassf9  | 0.00  | 0.00  | 0.00 | 1.00E+00 | no |
| Rax     | 0.00  | 0.00  | 0.00 | 1.00E+00 | no |
| Rbfox1  | 0.00  | 0.00  | 0.00 | 1.00E+00 | no |
| Rbfox2  | 0.00  | 0.00  | 0.00 | 1.00E+00 | no |
| Rbm31y  | 0.00  | 0.00  | 0.00 | 1.00E+00 | no |
| Rbm46   | 0.00  | 0.00  | 0.00 | 1.00E+00 | no |
| Rbms3   | 0.00  | 0.00  | 0.00 | 1.00E+00 | no |
| Rbmxl2  | 0.00  | 0.00  | 0.00 | 1.00E+00 | no |
| Rbmy1a1 | 0.00  | 0.00  | 0.00 | 1.00E+00 | no |
| Rbp4    | 0.00  | 0.00  | 0.00 | 1.00E+00 | no |
| Rcvrn   | 0.00  | 0.00  | 0.00 | 1.00E+00 | no |
| Rd3     | 0.00  | 0.00  | 0.00 | 1.00E+00 | no |
| Rdh19   | 0.00  | 0.00  | 0.00 | 1.00E+00 | no |
| Rdh7    | 0.00  | 0.00  | 0.00 | 1.00E+00 | no |
| Reg1    | 0.00  | 0.00  | 0.00 | 1.00E+00 | no |
| Reg2    | 0.00  | 0.00  | 0.00 | 1.00E+00 | no |
| Reg3a   | 0.00  | 0.00  | 0.00 | 1.00E+00 | no |
| Reg3b   | 0.00  | 0.00  | 0.00 | 1.00E+00 | no |
| Reg3d   | 0.00  | 0.00  | 0.00 | 1.00E+00 | no |
| Reg3g   | 0.00  | 0.00  | 0.00 | 1.00E+00 | no |
| Reg4    | 0.00  | 0.00  | 0.00 | 1.00E+00 | no |
| Ren2    | 0.24  | 0.00  | 0.00 | 1.00E+00 | no |
| Repin1  | 14.99 | 26.96 | 0.00 | 1.00E+00 | no |
| Rerg    | 0.00  | 0.00  | 0.00 | 1.00E+00 | no |
| Rergl   | 0.00  | 0.00  | 0.00 | 1.00E+00 | no |
| Resp18  | 0.00  | 0.00  | 0.00 | 1.00E+00 | no |
| Retnla  | 0.00  | 0.00  | 0.00 | 1.00E+00 | no |
| Rfpl4b  | 0.00  | 0.00  | 0.00 | 1.00E+00 | no |
| Rfx4    | 0.00  | 0.00  | 0.00 | 1.00E+00 | no |
| Rfx6    | 0.00  | 0.00  | 0.00 | 1.00E+00 | no |
| Rgn     | 0.00  | 0.00  | 0.00 | 1.00E+00 | no |
| Rgs17   | 0.00  | 0.00  | 0.00 | 1.00E+00 | no |
| Rgs20   | 0.00  | 0.00  | 0.00 | 1.00E+00 | no |
| Rgs4    | 0.00  | 0.00  | 0.00 | 1.00E+00 | no |
| Rgs5    | 0.00  | 0.00  | 0.00 | 1.00E+00 | no |
| Rgs6    | 0.00  | 0.00  | 0.00 | 1.00E+00 | no |
| Rgs7    | 0.00  | 0.00  | 0.00 | 1.00E+00 | no |
| Rhbdl2  | 0.00  | 0.00  | 0.00 | 1.00E+00 | no |
| Rhbg    | 0.00  | 0.00  | 0.00 | 1.00E+00 | no |
| Rhox1   | 0.00  | 0.00  | 0.00 | 1.00E+00 | no |
| Rhox10  | 0.00  | 0.00  | 0.00 | 1.00E+00 | no |
| Rhox11  | 0.00  | 0.00  | 0.00 | 1.00E+00 | no |



|              |      |      |      |          |    |
|--------------|------|------|------|----------|----|
| Rhox12       | 0.00 | 0.00 | 0.00 | 1.00E+00 | no |
| Rhox13       | 0.00 | 0.00 | 0.00 | 1.00E+00 | no |
| Rhox2a       | 0.00 | 0.00 | 0.00 | 1.00E+00 | no |
| Rhox2b       | 0.00 | 0.00 | 0.00 | 1.00E+00 | no |
| Rhox2c       | 0.00 | 0.00 | 0.00 | 1.00E+00 | no |
| Rhox2d       | 0.00 | 0.00 | 0.00 | 1.00E+00 | no |
| Rhox2e       | 0.00 | 0.00 | 0.00 | 1.00E+00 | no |
| Rhox2f       | 0.00 | 0.00 | 0.00 | 1.00E+00 | no |
| Rhox2g       | 0.00 | 0.00 | 0.00 | 1.00E+00 | no |
| Rhox2h       | 0.00 | 0.00 | 0.00 | 1.00E+00 | no |
| Rhox3-ps     | 0.00 | 0.00 | 0.00 | 1.00E+00 | no |
| Rhox3a,Rhox3 | 0.00 | 0.00 | 0.00 | 1.00E+00 | no |
| Rhox3b       | 0.00 | 0.00 | 0.00 | 1.00E+00 | no |
| Rhox3c       | 0.00 | 0.00 | 0.00 | 1.00E+00 | no |
| Rhox3e       | 0.00 | 0.00 | 0.00 | 1.00E+00 | no |
| Rhox3f       | 0.00 | 0.00 | 0.00 | 1.00E+00 | no |
| Rhox3g-ps    | 0.00 | 0.00 | 0.00 | 1.00E+00 | no |
| Rhox3h       | 0.00 | 0.00 | 0.00 | 1.00E+00 | no |
| Rhox4a       | 0.00 | 0.00 | 0.00 | 1.00E+00 | no |
| Rhox4b       | 0.00 | 0.00 | 0.00 | 1.00E+00 | no |
| Rhox4c       | 0.00 | 0.00 | 0.00 | 1.00E+00 | no |
| Rhox4d       | 0.00 | 0.00 | 0.00 | 1.00E+00 | no |
| Rhox4e       | 0.00 | 0.00 | 0.00 | 1.00E+00 | no |
| Rhox4f       | 0.00 | 0.00 | 0.00 | 1.00E+00 | no |
| Rhox4g       | 0.00 | 0.00 | 0.00 | 1.00E+00 | no |
| Rhox6        | 0.00 | 0.00 | 0.00 | 1.00E+00 | no |
| Rhox7        | 0.00 | 0.00 | 0.00 | 1.00E+00 | no |
| Rhox8        | 0.00 | 0.00 | 0.00 | 1.00E+00 | no |
| Rhox9        | 0.00 | 0.00 | 0.00 | 1.00E+00 | no |
| Rhpn1        | 0.00 | 0.00 | 0.00 | 1.00E+00 | no |
| Rian         | 0.00 | 0.00 | 0.00 | 1.00E+00 | no |
| Rimbp2       | 0.00 | 0.00 | 0.00 | 1.00E+00 | no |
| Rimklb       | 0.00 | 0.00 | 0.00 | 1.00E+00 | no |
| Rims1        | 0.00 | 0.00 | 0.00 | 1.00E+00 | no |
| Rims2        | 0.00 | 0.00 | 0.00 | 1.00E+00 | no |
| Rims4        | 0.00 | 0.00 | 0.00 | 1.00E+00 | no |
| Ripply1      | 0.00 | 0.00 | 0.00 | 1.00E+00 | no |
| Ripply2      | 0.00 | 0.00 | 0.00 | 1.00E+00 | no |
| Rit2         | 0.00 | 0.00 | 0.00 | 1.00E+00 | no |
| Rlbp1        | 0.00 | 0.00 | 0.00 | 1.00E+00 | no |
| Rmst         | 0.00 | 0.00 | 0.00 | 1.00E+00 | no |
| Rn4.5s       | 0.00 | 0.00 | 0.00 | 1.00E+00 | no |

|           |       |       |      |          |    |
|-----------|-------|-------|------|----------|----|
| Rnase13   | 0.00  | 0.00  | 0.00 | 1.00E+00 | no |
| Rnf112    | 0.00  | 0.00  | 0.00 | 1.00E+00 | no |
| Rnf133    | 0.00  | 0.00  | 0.00 | 1.00E+00 | no |
| Rnf148    | 0.00  | 0.00  | 0.00 | 1.00E+00 | no |
| Rnf152    | 0.00  | 0.00  | 0.00 | 1.00E+00 | no |
| Rnf165    | 0.00  | 0.00  | 0.00 | 1.00E+00 | no |
| Rnf183    | 0.00  | 0.00  | 0.00 | 1.00E+00 | no |
| Rnf222    | 0.00  | 0.00  | 0.00 | 1.00E+00 | no |
| Rnu1b2    | 0.00  | 0.00  | 0.00 | 1.00E+00 | no |
| Robo2     | 0.00  | 0.00  | 0.00 | 1.00E+00 | no |
| Ropn1     | 0.00  | 0.00  | 0.00 | 1.00E+00 | no |
| Ror1      | 0.00  | 0.00  | 0.00 | 1.00E+00 | no |
| Ror2      | 0.00  | 0.00  | 0.00 | 1.00E+00 | no |
| Rorb      | 0.00  | 0.00  | 0.00 | 1.00E+00 | no |
| Ros1      | 0.00  | 0.00  | 0.00 | 1.00E+00 | no |
| Rp1       | 0.00  | 0.00  | 0.00 | 1.00E+00 | no |
| Rpe65     | 0.00  | 0.00  | 0.00 | 1.00E+00 | no |
| Rph3a     | 0.00  | 0.00  | 0.00 | 1.00E+00 | no |
| Rpl10l    | 0.00  | 0.00  | 0.00 | 1.00E+00 | no |
| Rpl34-ps1 | 0.00  | 0.00  | 0.00 | 1.00E+00 | no |
| Rprl2     | 0.00  | 0.00  | 0.00 | 1.00E+00 | no |
| Rprl3     | 0.00  | 0.00  | 0.00 | 1.00E+00 | no |
| Rprm      | 0.00  | 0.00  | 0.00 | 1.00E+00 | no |
| Rprml     | 0.00  | 0.00  | 0.00 | 1.00E+00 | no |
| Rptn      | 0.00  | 0.00  | 0.00 | 1.00E+00 | no |
| Rs1       | 0.00  | 0.00  | 0.00 | 1.00E+00 | no |
| Rspo2     | 0.00  | 0.00  | 0.00 | 1.00E+00 | no |
| Rtdr1     | 0.00  | 0.00  | 0.00 | 1.00E+00 | no |
| Rtel1     | 18.65 | 15.17 | 0.00 | 1.00E+00 | no |
| Rtl1      | 0.00  | 0.00  | 0.00 | 1.00E+00 | no |
| Rtn2      | 0.00  | 0.00  | 0.00 | 1.00E+00 | no |
| Rtp1      | 0.00  | 0.00  | 0.00 | 1.00E+00 | no |
| Rtp2      | 0.00  | 0.00  | 0.00 | 1.00E+00 | no |
| Runx1     | 36.46 | 42.11 | 0.00 | 1.00E+00 | no |
| Runx1t1   | 0.00  | 0.00  | 0.00 | 1.00E+00 | no |
| Rxfp2     | 0.00  | 0.00  | 0.00 | 1.00E+00 | no |
| Ryk       | 0.00  | 0.00  | 0.00 | 1.00E+00 | no |
| S100a2    | 0.00  | 0.00  | 0.00 | 1.00E+00 | no |
| S100a5    | 0.00  | 0.00  | 0.00 | 1.00E+00 | no |
| S100a7a   | 0.00  | 0.00  | 0.00 | 1.00E+00 | no |
| S100b     | 0.00  | 0.00  | 0.00 | 1.00E+00 | no |
| S100g     | 0.00  | 0.00  | 0.00 | 1.00E+00 | no |

|          |      |      |      |          |    |
|----------|------|------|------|----------|----|
| S100z    | 0.00 | 0.00 | 0.00 | 1.00E+00 | no |
| Saa1     | 0.00 | 0.00 | 0.00 | 1.00E+00 | no |
| Saa2     | 0.00 | 0.00 | 0.00 | 1.00E+00 | no |
| Saa4     | 0.00 | 0.00 | 0.00 | 1.00E+00 | no |
| Sall1    | 0.00 | 0.00 | 0.00 | 1.00E+00 | no |
| Sall3    | 0.00 | 0.00 | 0.00 | 1.00E+00 | no |
| Sall4    | 0.00 | 0.00 | 0.00 | 1.00E+00 | no |
| Samd7    | 0.00 | 0.00 | 0.00 | 1.00E+00 | no |
| Sarm1    | 0.00 | 0.00 | 0.00 | 1.00E+00 | no |
| Sbp      | 0.00 | 0.00 | 0.00 | 1.00E+00 | no |
| Sbpl     | 0.00 | 0.00 | 0.00 | 1.00E+00 | no |
| Scara3   | 0.00 | 0.00 | 0.00 | 1.00E+00 | no |
| Scarna10 | 0.00 | 0.00 | 0.00 | 1.00E+00 | no |
| Scarna2  | 0.00 | 0.00 | 0.00 | 1.00E+00 | no |
| Scarna3b | 0.00 | 0.00 | 0.00 | 1.00E+00 | no |
| Scarna8  | 0.00 | 0.00 | 0.00 | 1.00E+00 | no |
| Scarna9  | 0.00 | 0.00 | 0.00 | 1.00E+00 | no |
| Scg3     | 0.00 | 0.00 | 0.00 | 1.00E+00 | no |
| Scgb1a1  | 0.00 | 0.00 | 0.00 | 1.00E+00 | no |
| Scgb3a2  | 0.00 | 0.00 | 0.00 | 1.00E+00 | no |
| Schip1   | 0.00 | 0.00 | 0.00 | 1.00E+00 | no |
| Scn10a   | 0.00 | 0.00 | 0.00 | 1.00E+00 | no |
| Scn3b    | 0.00 | 0.00 | 0.00 | 1.00E+00 | no |
| Scn7a    | 0.00 | 0.00 | 0.00 | 1.00E+00 | no |
| Scnn1b   | 0.00 | 0.00 | 0.00 | 1.00E+00 | no |
| Scnn1g   | 0.00 | 0.00 | 0.00 | 1.00E+00 | no |
| Sco2     | 2.01 | 2.41 | 0.00 | 1.00E+00 | no |
| Scpppq1  | 0.00 | 0.00 | 0.00 | 1.00E+00 | no |
| Scrt1    | 0.00 | 0.00 | 0.00 | 1.00E+00 | no |
| Sct      | 0.00 | 0.00 | 0.00 | 1.00E+00 | no |
| Sctr     | 0.00 | 0.00 | 0.00 | 1.00E+00 | no |
| Scube2   | 0.00 | 0.00 | 0.00 | 1.00E+00 | no |
| Sdr16c5  | 0.00 | 0.00 | 0.00 | 1.00E+00 | no |
| Sdr16c6  | 0.00 | 0.00 | 0.00 | 1.00E+00 | no |
| Sdr9c7   | 0.00 | 0.00 | 0.00 | 1.00E+00 | no |
| Sebox    | 0.00 | 0.00 | 0.00 | 1.00E+00 | no |
| Sec14l3  | 0.00 | 0.00 | 0.00 | 1.00E+00 | no |
| Sec14l4  | 0.00 | 0.00 | 0.00 | 1.00E+00 | no |
| Sectm1a  | 0.00 | 0.00 | 0.00 | 1.00E+00 | no |
| Sel1l2   | 0.00 | 0.00 | 0.00 | 1.00E+00 | no |
| Sema3b   | 0.00 | 0.00 | 0.00 | 1.00E+00 | no |
| Sema3c   | 0.00 | 0.00 | 0.00 | 1.00E+00 | no |

|              |       |       |      |          |    |
|--------------|-------|-------|------|----------|----|
| Sema3e       | 0.00  | 0.00  | 0.00 | 1.00E+00 | no |
| Sema5b       | 0.00  | 0.00  | 0.00 | 1.00E+00 | no |
| Sema6d       | 0.00  | 0.00  | 0.00 | 1.00E+00 | no |
| Serp7        | 12.12 | 15.35 | 0.00 | 1.00E+00 | no |
| 14-Sep       | 0.00  | 0.00  | 0.00 | 1.00E+00 | no |
| Serbp1       | 68.71 | 55.72 | 0.00 | 1.00E+00 | no |
| Serinc2      | 0.00  | 0.00  | 0.00 | 1.00E+00 | no |
| Serpina10    | 0.00  | 0.00  | 0.00 | 1.00E+00 | no |
| Serpina11    | 0.00  | 0.00  | 0.00 | 1.00E+00 | no |
| Serpina12    | 0.00  | 0.00  | 0.00 | 1.00E+00 | no |
| Serpina1b    | 0.00  | 0.00  | 0.00 | 1.00E+00 | no |
| Serpina1d    | 0.00  | 0.00  | 0.00 | 1.00E+00 | no |
| Serpina1e    | 0.00  | 0.00  | 0.00 | 1.00E+00 | no |
| Serpina1f    | 0.00  | 0.00  | 0.00 | 1.00E+00 | no |
| Serpina3a    | 0.00  | 0.00  | 0.00 | 1.00E+00 | no |
| Serpina3b    | 0.00  | 0.00  | 0.00 | 1.00E+00 | no |
| Serpina4-ps1 | 0.00  | 0.00  | 0.00 | 1.00E+00 | no |
| Serpina5     | 0.00  | 0.00  | 0.00 | 1.00E+00 | no |
| Serpina6     | 0.00  | 0.00  | 0.00 | 1.00E+00 | no |
| Serpina7     | 0.00  | 0.00  | 0.00 | 1.00E+00 | no |
| Serpina9     | 0.00  | 0.00  | 0.00 | 1.00E+00 | no |
| Serpinb11    | 0.00  | 0.00  | 0.00 | 1.00E+00 | no |
| Serpinb12    | 0.00  | 0.00  | 0.00 | 1.00E+00 | no |
| Serpinb13    | 0.00  | 0.00  | 0.00 | 1.00E+00 | no |
| Serpinb2     | 0.00  | 0.00  | 0.00 | 1.00E+00 | no |
| Serpinb3a    | 0.00  | 0.00  | 0.00 | 1.00E+00 | no |
| Serpinb3b    | 0.00  | 0.00  | 0.00 | 1.00E+00 | no |
| Serpinb3c    | 0.00  | 0.00  | 0.00 | 1.00E+00 | no |
| Serpinb3d    | 0.00  | 0.00  | 0.00 | 1.00E+00 | no |
| Serpinb5     | 0.00  | 0.00  | 0.00 | 1.00E+00 | no |
| Serpinb6d    | 0.00  | 0.00  | 0.00 | 1.00E+00 | no |
| Serpinb6e    | 0.00  | 0.00  | 0.00 | 1.00E+00 | no |
| Serpinb8     | 0.00  | 0.00  | 0.00 | 1.00E+00 | no |
| Serpinb9c    | 0.00  | 0.00  | 0.00 | 1.00E+00 | no |
| Serpinb9d    | 0.00  | 0.00  | 0.00 | 1.00E+00 | no |
| Serpinb9e    | 0.00  | 0.00  | 0.00 | 1.00E+00 | no |
| Serpinb9f    | 0.00  | 0.00  | 0.00 | 1.00E+00 | no |
| Serpinb9g    | 0.00  | 0.00  | 0.00 | 1.00E+00 | no |
| Serpine1     | 0.00  | 0.00  | 0.00 | 1.00E+00 | no |
| Serping1     | 0.00  | 0.00  | 0.00 | 1.00E+00 | no |
| Serpini2     | 0.00  | 0.00  | 0.00 | 1.00E+00 | no |
| Sez6         | 0.00  | 0.00  | 0.00 | 1.00E+00 | no |

|         |       |       |      |          |    |
|---------|-------|-------|------|----------|----|
| Sfi1    | 12.01 | 12.41 | 0.00 | 1.00E+00 | no |
| Sfrp1   | 0.00  | 0.00  | 0.00 | 1.00E+00 | no |
| Sfta2   | 0.00  | 0.00  | 0.00 | 1.00E+00 | no |
| Sftpa1  | 0.00  | 0.00  | 0.00 | 1.00E+00 | no |
| Sftpc   | 0.00  | 0.00  | 0.00 | 1.00E+00 | no |
| Sftpd   | 0.00  | 0.00  | 0.00 | 1.00E+00 | no |
| Sgcd    | 0.00  | 0.00  | 0.00 | 1.00E+00 | no |
| Sgcg    | 0.00  | 0.00  | 0.00 | 1.00E+00 | no |
| Sgcz    | 0.00  | 0.00  | 0.00 | 1.00E+00 | no |
| Sh2d1a  | 0.00  | 0.00  | 0.00 | 1.00E+00 | no |
| Sh2d7   | 0.00  | 0.00  | 0.00 | 1.00E+00 | no |
| Sh3gl2  | 0.00  | 0.00  | 0.00 | 1.00E+00 | no |
| Sh3rf2  | 0.00  | 0.00  | 0.00 | 1.00E+00 | no |
| Sh3rf3  | 0.00  | 0.00  | 0.00 | 1.00E+00 | no |
| Shbg    | 0.00  | 0.00  | 0.00 | 1.00E+00 | no |
| Shc2    | 0.00  | 0.00  | 0.00 | 1.00E+00 | no |
| Shc3    | 0.00  | 0.00  | 0.00 | 1.00E+00 | no |
| Shd     | 0.00  | 0.00  | 0.00 | 1.00E+00 | no |
| Shh     | 0.00  | 0.00  | 0.00 | 1.00E+00 | no |
| Shisa6  | 0.00  | 0.00  | 0.00 | 1.00E+00 | no |
| Shisa9  | 0.00  | 0.00  | 0.00 | 1.00E+00 | no |
| Shox2   | 0.00  | 0.00  | 0.00 | 1.00E+00 | no |
| Shroom1 | 0.00  | 0.00  | 0.00 | 1.00E+00 | no |
| Shroom2 | 0.00  | 0.00  | 0.00 | 1.00E+00 | no |
| Shroom3 | 0.72  | 0.00  | 0.00 | 1.00E+00 | no |
| Siah3   | 0.00  | 0.00  | 0.00 | 1.00E+00 | no |
| Sidt1   | 0.00  | 0.00  | 0.00 | 1.00E+00 | no |
| Sim2    | 0.00  | 0.00  | 0.00 | 1.00E+00 | no |
| Sipa1   | 81.41 | 90.28 | 0.00 | 1.00E+00 | no |
| Sis     | 0.00  | 0.00  | 0.00 | 1.00E+00 | no |
| Six1    | 0.00  | 0.00  | 0.00 | 1.00E+00 | no |
| Six3    | 0.00  | 0.00  | 0.00 | 1.00E+00 | no |
| Six3os1 | 0.00  | 0.00  | 0.00 | 1.00E+00 | no |
| Six4    | 0.00  | 0.00  | 0.00 | 1.00E+00 | no |
| Six6    | 0.00  | 0.00  | 0.00 | 1.00E+00 | no |
| Skint1  | 0.00  | 0.00  | 0.00 | 1.00E+00 | no |
| Skint10 | 0.00  | 0.00  | 0.00 | 1.00E+00 | no |
| Skint11 | 0.00  | 0.00  | 0.00 | 1.00E+00 | no |
| Skint2  | 0.00  | 0.00  | 0.00 | 1.00E+00 | no |
| Skint4  | 0.00  | 0.00  | 0.00 | 1.00E+00 | no |
| Skint5  | 0.00  | 0.00  | 0.00 | 1.00E+00 | no |
| Skint6  | 0.00  | 0.00  | 0.00 | 1.00E+00 | no |

|          |      |      |      |          |    |
|----------|------|------|------|----------|----|
| Skint7   | 0.00 | 0.00 | 0.00 | 1.00E+00 | no |
| Skint8   | 0.00 | 0.00 | 0.00 | 1.00E+00 | no |
| Skint9   | 0.00 | 0.00 | 0.00 | 1.00E+00 | no |
| Skor1    | 0.00 | 0.00 | 0.00 | 1.00E+00 | no |
| Skor2    | 0.00 | 0.00 | 0.00 | 1.00E+00 | no |
| Slc10a2  | 0.00 | 0.00 | 0.00 | 1.00E+00 | no |
| Slc10a4  | 0.00 | 0.00 | 0.00 | 1.00E+00 | no |
| Slc10a6  | 0.00 | 0.00 | 0.00 | 1.00E+00 | no |
| Slc12a1  | 0.00 | 0.00 | 0.00 | 1.00E+00 | no |
| Slc13a1  | 0.00 | 0.00 | 0.00 | 1.00E+00 | no |
| Slc13a2  | 0.00 | 0.00 | 0.00 | 1.00E+00 | no |
| Slc13a5  | 0.00 | 0.00 | 0.00 | 1.00E+00 | no |
| Slc14a2  | 0.00 | 0.00 | 0.00 | 1.00E+00 | no |
| Slc15a5  | 0.00 | 0.00 | 0.00 | 1.00E+00 | no |
| Slc16a14 | 0.00 | 0.00 | 0.00 | 1.00E+00 | no |
| Slc17a2  | 0.00 | 0.00 | 0.00 | 1.00E+00 | no |
| Slc17a3  | 0.00 | 0.00 | 0.00 | 1.00E+00 | no |
| Slc18a3  | 0.00 | 0.00 | 0.00 | 1.00E+00 | no |
| Slc1a2   | 0.00 | 0.00 | 0.00 | 1.00E+00 | no |
| Slc1a7   | 0.00 | 0.00 | 0.00 | 1.00E+00 | no |
| Slc22a1  | 0.00 | 0.00 | 0.00 | 1.00E+00 | no |
| Slc22a14 | 0.00 | 0.00 | 0.00 | 1.00E+00 | no |
| Slc22a16 | 0.00 | 0.00 | 0.00 | 1.00E+00 | no |
| Slc22a19 | 0.00 | 0.00 | 0.00 | 1.00E+00 | no |
| Slc22a2  | 0.00 | 0.00 | 0.00 | 1.00E+00 | no |
| Slc22a20 | 0.00 | 0.00 | 0.00 | 1.00E+00 | no |
| Slc22a6  | 0.00 | 0.00 | 0.00 | 1.00E+00 | no |
| Slc22a7  | 0.00 | 0.00 | 0.00 | 1.00E+00 | no |
| Slc22a8  | 0.24 | 0.00 | 0.00 | 1.00E+00 | no |
| Slc24a2  | 0.00 | 0.00 | 0.00 | 1.00E+00 | no |
| Slc25a48 | 0.00 | 0.00 | 0.00 | 1.00E+00 | no |
| Slc26a4  | 0.00 | 0.00 | 0.00 | 1.00E+00 | no |
| Slc26a7  | 0.00 | 0.00 | 0.00 | 1.00E+00 | no |
| Slc26a9  | 0.00 | 0.00 | 0.00 | 1.00E+00 | no |
| Slc2a2   | 0.00 | 0.00 | 0.00 | 1.00E+00 | no |
| Slc2a7   | 0.00 | 0.00 | 0.00 | 1.00E+00 | no |
| Slc30a2  | 0.00 | 0.00 | 0.00 | 1.00E+00 | no |
| Slc30a8  | 0.00 | 0.00 | 0.00 | 1.00E+00 | no |
| Slc34a2  | 0.00 | 0.00 | 0.00 | 1.00E+00 | no |
| Slc35f1  | 0.00 | 0.00 | 0.00 | 1.00E+00 | no |
| Slc38a11 | 0.00 | 0.00 | 0.00 | 1.00E+00 | no |
| Slc38a3  | 0.00 | 0.00 | 0.00 | 1.00E+00 | no |

|          |      |      |      |          |    |
|----------|------|------|------|----------|----|
| Slc38a4  | 0.00 | 0.00 | 0.00 | 1.00E+00 | no |
| Slc39a12 | 0.00 | 0.00 | 0.00 | 1.00E+00 | no |
| Slc39a5  | 0.00 | 0.00 | 0.00 | 1.00E+00 | no |
| Slc44a4  | 0.00 | 0.00 | 0.00 | 1.00E+00 | no |
| Slc45a1  | 0.00 | 0.00 | 0.00 | 1.00E+00 | no |
| Slc46a2  | 0.00 | 0.00 | 0.00 | 1.00E+00 | no |
| Slc4a3   | 0.00 | 0.00 | 0.00 | 1.00E+00 | no |
| Slc4a4   | 0.00 | 0.00 | 0.00 | 1.00E+00 | no |
| Slc5a1   | 0.00 | 0.00 | 0.00 | 1.00E+00 | no |
| Slc5a12  | 0.00 | 0.00 | 0.00 | 1.00E+00 | no |
| Slc5a4a  | 0.00 | 0.00 | 0.00 | 1.00E+00 | no |
| Slc5a4b  | 0.00 | 0.00 | 0.00 | 1.00E+00 | no |
| Slc5a7   | 0.00 | 0.00 | 0.00 | 1.00E+00 | no |
| Slc6a1   | 0.00 | 0.00 | 0.00 | 1.00E+00 | no |
| Slc6a11  | 0.00 | 0.00 | 0.00 | 1.00E+00 | no |
| Slc6a14  | 0.00 | 0.00 | 0.00 | 1.00E+00 | no |
| Slc6a15  | 0.00 | 0.00 | 0.00 | 1.00E+00 | no |
| Slc6a18  | 0.00 | 0.00 | 0.00 | 1.00E+00 | no |
| Slc6a2   | 0.00 | 0.00 | 0.00 | 1.00E+00 | no |
| Slc6a3   | 0.00 | 0.00 | 0.00 | 1.00E+00 | no |
| Slc6a4   | 0.00 | 0.00 | 0.00 | 1.00E+00 | no |
| Slc6a5   | 0.00 | 0.00 | 0.00 | 1.00E+00 | no |
| Slc6a7   | 0.00 | 0.00 | 0.00 | 1.00E+00 | no |
| Slc6a8   | 0.00 | 0.00 | 0.00 | 1.00E+00 | no |
| Slc7a10  | 0.00 | 0.00 | 0.00 | 1.00E+00 | no |
| Slc7a13  | 0.00 | 0.00 | 0.00 | 1.00E+00 | no |
| Slc7a15  | 0.00 | 0.00 | 0.00 | 1.00E+00 | no |
| Slc7a2   | 0.00 | 0.00 | 0.00 | 1.00E+00 | no |
| Slc7a9   | 0.00 | 0.00 | 0.00 | 1.00E+00 | no |
| Slc8a3   | 0.00 | 0.00 | 0.00 | 1.00E+00 | no |
| Slc9a10  | 0.00 | 0.00 | 0.00 | 1.00E+00 | no |
| Slc9a4   | 0.00 | 0.00 | 0.00 | 1.00E+00 | no |
| Slco1a1  | 0.00 | 0.00 | 0.00 | 1.00E+00 | no |
| Slco1a4  | 0.00 | 0.00 | 0.00 | 1.00E+00 | no |
| Slco1a5  | 0.00 | 0.00 | 0.00 | 1.00E+00 | no |
| Slco1a6  | 0.00 | 0.00 | 0.00 | 1.00E+00 | no |
| Slco1c1  | 0.00 | 0.00 | 0.00 | 1.00E+00 | no |
| Slco4c1  | 0.00 | 0.00 | 0.00 | 1.00E+00 | no |
| Slco6b1  | 0.00 | 0.00 | 0.00 | 1.00E+00 | no |
| Slco6c1  | 0.00 | 0.00 | 0.00 | 1.00E+00 | no |
| Slco6d1  | 0.00 | 0.00 | 0.00 | 1.00E+00 | no |
| Slitrk1  | 0.00 | 0.00 | 0.00 | 1.00E+00 | no |

|         |        |        |      |          |    |
|---------|--------|--------|------|----------|----|
| Slitrk2 | 0.00   | 0.00   | 0.00 | 1.00E+00 | no |
| Slitrk3 | 0.00   | 0.00   | 0.00 | 1.00E+00 | no |
| Slitrk4 | 0.00   | 0.00   | 0.00 | 1.00E+00 | no |
| Slitrk6 | 0.00   | 0.00   | 0.00 | 1.00E+00 | no |
| Sln     | 0.00   | 0.00   | 0.00 | 1.00E+00 | no |
| Slurp1  | 0.00   | 0.00   | 0.00 | 1.00E+00 | no |
| Slx     | 0.00   | 0.00   | 0.00 | 1.00E+00 | no |
| Slxl1   | 0.00   | 0.00   | 0.00 | 1.00E+00 | no |
| Sly     | 0.00   | 0.00   | 0.00 | 1.00E+00 | no |
| Smarca4 | 130.12 | 145.46 | 0.00 | 1.00E+00 | no |
| Smcp    | 0.00   | 0.00   | 0.00 | 1.00E+00 | no |
| Smgc    | 0.00   | 0.00   | 0.00 | 1.00E+00 | no |
| Smoc1   | 0.00   | 0.00   | 0.00 | 1.00E+00 | no |
| Smoc2   | 0.00   | 0.00   | 0.00 | 1.00E+00 | no |
| Smok3a  | 0.00   | 0.00   | 0.00 | 1.00E+00 | no |
| Smok3b  | 0.00   | 0.00   | 0.00 | 1.00E+00 | no |
| Smok4a  | 0.00   | 0.00   | 0.00 | 1.00E+00 | no |
| Smpx    | 0.00   | 0.00   | 0.00 | 1.00E+00 | no |
| Smr2    | 0.00   | 0.00   | 0.00 | 1.00E+00 | no |
| Smr3a   | 0.00   | 0.00   | 0.00 | 1.00E+00 | no |
| Smtnl1  | 0.00   | 0.00   | 0.00 | 1.00E+00 | no |
| Smyd1   | 0.00   | 0.00   | 0.00 | 1.00E+00 | no |
| Snap25  | 0.00   | 0.00   | 0.00 | 1.00E+00 | no |
| Snap91  | 0.00   | 0.00   | 0.00 | 1.00E+00 | no |
| Snca    | 0.00   | 0.00   | 0.00 | 1.00E+00 | no |
| Snciaip | 0.00   | 0.00   | 0.00 | 1.00E+00 | no |
| Sncb    | 0.00   | 0.00   | 0.00 | 1.00E+00 | no |
| Sncg    | 0.00   | 0.00   | 0.00 | 1.00E+00 | no |
| Snph    | 0.00   | 0.00   | 0.00 | 1.00E+00 | no |
| Sntg1   | 0.00   | 0.00   | 0.00 | 1.00E+00 | no |
| Sntg2   | 0.00   | 0.00   | 0.00 | 1.00E+00 | no |
| Sntn    | 0.00   | 0.00   | 0.00 | 1.00E+00 | no |
| Sohlh2  | 0.00   | 0.00   | 0.00 | 1.00E+00 | no |
| Sorcs1  | 0.00   | 0.00   | 0.00 | 1.00E+00 | no |
| Sorcs3  | 0.00   | 0.00   | 0.00 | 1.00E+00 | no |
| Sost    | 0.00   | 0.00   | 0.00 | 1.00E+00 | no |
| Sostdc1 | 0.00   | 0.00   | 0.00 | 1.00E+00 | no |
| Sox1    | 0.00   | 0.00   | 0.00 | 1.00E+00 | no |
| Sox10   | 0.00   | 0.00   | 0.00 | 1.00E+00 | no |
| Sox11   | 0.00   | 0.00   | 0.00 | 1.00E+00 | no |
| Sox14   | 0.00   | 0.00   | 0.00 | 1.00E+00 | no |
| Sox17   | 0.00   | 0.00   | 0.00 | 1.00E+00 | no |



|            |       |       |      |          |    |
|------------|-------|-------|------|----------|----|
| Sox18      | 0.00  | 0.00  | 0.00 | 1.00E+00 | no |
| Sox2       | 0.00  | 0.00  | 0.00 | 1.00E+00 | no |
| Sox21      | 0.00  | 0.00  | 0.00 | 1.00E+00 | no |
| Sox2ot     | 0.00  | 0.00  | 0.00 | 1.00E+00 | no |
| Sox3       | 0.00  | 0.00  | 0.00 | 1.00E+00 | no |
| Sox30      | 0.00  | 0.00  | 0.00 | 1.00E+00 | no |
| Sox5       | 0.36  | 0.00  | 0.00 | 1.00E+00 | no |
| Sox6       | 0.00  | 0.00  | 0.00 | 1.00E+00 | no |
| Sox7       | 0.00  | 0.00  | 0.00 | 1.00E+00 | no |
| Sox9       | 0.00  | 0.00  | 0.00 | 1.00E+00 | no |
| Sp5        | 0.00  | 0.00  | 0.00 | 1.00E+00 | no |
| Sp7        | 0.00  | 0.00  | 0.00 | 1.00E+00 | no |
| Sp8        | 0.00  | 0.00  | 0.00 | 1.00E+00 | no |
| Sp9        | 0.00  | 0.00  | 0.00 | 1.00E+00 | no |
| Spaca3     | 0.00  | 0.00  | 0.00 | 1.00E+00 | no |
| Spag11a    | 0.00  | 0.00  | 0.00 | 1.00E+00 | no |
| Spag11b    | 0.00  | 0.00  | 0.00 | 1.00E+00 | no |
| Spag16     | 0.00  | 0.00  | 0.00 | 1.00E+00 | no |
| Spag9      | 25.66 | 21.33 | 0.00 | 1.00E+00 | no |
| Spam1      | 0.00  | 0.00  | 0.00 | 1.00E+00 | no |
| Spata16    | 0.00  | 0.00  | 0.00 | 1.00E+00 | no |
| Spata18    | 0.00  | 0.00  | 0.00 | 1.00E+00 | no |
| Spata19    | 0.00  | 0.00  | 0.00 | 1.00E+00 | no |
| Spata20    | 0.00  | 0.00  | 0.00 | 1.00E+00 | no |
| Spata22    | 0.00  | 0.00  | 0.00 | 1.00E+00 | no |
| Spata3     | 0.00  | 0.00  | 0.00 | 1.00E+00 | no |
| Spats2     | 0.00  | 0.00  | 0.00 | 1.00E+00 | no |
| Spats2l    | 0.00  | 0.00  | 0.00 | 1.00E+00 | no |
| Spdef      | 0.00  | 0.00  | 0.00 | 1.00E+00 | no |
| Spdyb      | 0.00  | 0.00  | 0.00 | 1.00E+00 | no |
| Speer1-ps1 | 0.00  | 0.00  | 0.00 | 1.00E+00 | no |
| Speer3     | 0.00  | 0.00  | 0.00 | 1.00E+00 | no |
| Speer4a    | 0.00  | 0.00  | 0.00 | 1.00E+00 | no |
| Speer4b    | 0.00  | 0.00  | 0.00 | 1.00E+00 | no |
| Speer4c    | 0.00  | 0.00  | 0.00 | 1.00E+00 | no |
| Speer4d    | 0.00  | 0.00  | 0.00 | 1.00E+00 | no |
| Speer4e    | 0.00  | 0.00  | 0.00 | 1.00E+00 | no |
| Speer4f    | 0.00  | 0.00  | 0.00 | 1.00E+00 | no |
| Speer5-ps1 | 0.00  | 0.00  | 0.00 | 1.00E+00 | no |
| Speer6-ps1 | 0.00  | 0.00  | 0.00 | 1.00E+00 | no |
| Speer7-ps1 | 0.00  | 0.00  | 0.00 | 1.00E+00 | no |
| Speer8-ps1 | 0.00  | 0.00  | 0.00 | 1.00E+00 | no |

|            |      |      |      |          |    |
|------------|------|------|------|----------|----|
| Speer9-ps1 | 0.00 | 0.00 | 0.00 | 1.00E+00 | no |
| Spert      | 0.00 | 0.00 | 0.00 | 1.00E+00 | no |
| Spesp1     | 0.00 | 0.00 | 0.00 | 1.00E+00 | no |
| Sphkap     | 0.00 | 0.00 | 0.00 | 1.00E+00 | no |
| Spink11    | 0.00 | 0.00 | 0.00 | 1.00E+00 | no |
| Spink12    | 0.00 | 0.00 | 0.00 | 1.00E+00 | no |
| Spink14    | 0.00 | 0.00 | 0.00 | 1.00E+00 | no |
| Spink3     | 0.00 | 0.00 | 0.00 | 1.00E+00 | no |
| Spink4     | 0.00 | 0.00 | 0.00 | 1.00E+00 | no |
| Spink5     | 0.00 | 0.00 | 0.00 | 1.00E+00 | no |
| Spink6     | 0.00 | 0.00 | 0.00 | 1.00E+00 | no |
| Spink7     | 0.00 | 0.00 | 0.00 | 1.00E+00 | no |
| Spinlw1    | 0.00 | 0.00 | 0.00 | 1.00E+00 | no |
| Spint1     | 0.00 | 0.00 | 0.00 | 1.00E+00 | no |
| Spint3     | 0.00 | 0.00 | 0.00 | 1.00E+00 | no |
| Spint4     | 0.00 | 0.00 | 0.00 | 1.00E+00 | no |
| Spn-ps     | 0.00 | 0.00 | 0.00 | 1.00E+00 | no |
| Spnb4      | 0.04 | 0.00 | 0.00 | 1.00E+00 | no |
| Spock1     | 0.00 | 0.00 | 0.00 | 1.00E+00 | no |
| Spock3     | 0.00 | 0.00 | 0.00 | 1.00E+00 | no |
| Sprn       | 0.00 | 0.00 | 0.00 | 1.00E+00 | no |
| Sprr1a     | 0.00 | 0.00 | 0.00 | 1.00E+00 | no |
| Sprr1b     | 0.00 | 0.00 | 0.00 | 1.00E+00 | no |
| Sprr2b     | 0.00 | 0.00 | 0.00 | 1.00E+00 | no |
| Sprr2d     | 0.00 | 0.00 | 0.00 | 1.00E+00 | no |
| Sprr2e     | 0.00 | 0.00 | 0.00 | 1.00E+00 | no |
| Sprr2f     | 0.00 | 0.00 | 0.00 | 1.00E+00 | no |
| Sprr2g     | 0.00 | 0.00 | 0.00 | 1.00E+00 | no |
| Sprr2h     | 0.00 | 0.00 | 0.00 | 1.00E+00 | no |
| Sprr2i     | 0.00 | 0.00 | 0.00 | 1.00E+00 | no |
| Sprr2j-ps  | 0.00 | 0.00 | 0.00 | 1.00E+00 | no |
| Sprr2k     | 0.00 | 0.00 | 0.00 | 1.00E+00 | no |
| Sprr3      | 0.00 | 0.00 | 0.00 | 1.00E+00 | no |
| Sprr4      | 0.00 | 0.00 | 0.00 | 1.00E+00 | no |
| Spry3      | 0.00 | 0.00 | 0.00 | 1.00E+00 | no |
| Spt1       | 0.00 | 0.00 | 0.00 | 1.00E+00 | no |
| Sptlc3     | 0.00 | 0.00 | 0.00 | 1.00E+00 | no |
| Spz1       | 0.00 | 0.00 | 0.00 | 1.00E+00 | no |
| Src        | 0.00 | 0.00 | 0.00 | 1.00E+00 | no |
| Srd5a2     | 0.00 | 0.00 | 0.00 | 1.00E+00 | no |
| Srpx2      | 0.00 | 0.00 | 0.00 | 1.00E+00 | no |
| Srrm3      | 0.00 | 0.00 | 0.00 | 1.00E+00 | no |

|            |       |       |      |          |    |
|------------|-------|-------|------|----------|----|
| Srrm4      | 0.00  | 0.00  | 0.00 | 1.00E+00 | no |
| Sry        | 0.00  | 0.00  | 0.00 | 1.00E+00 | no |
| Ss18       | 48.59 | 40.28 | 0.00 | 1.00E+00 | no |
| Sst        | 0.00  | 0.00  | 0.00 | 1.00E+00 | no |
| Sstr1      | 0.00  | 0.00  | 0.00 | 1.00E+00 | no |
| Sstr5      | 0.00  | 0.00  | 0.00 | 1.00E+00 | no |
| Ssty1      | 0.00  | 0.00  | 0.00 | 1.00E+00 | no |
| Ssty2      | 0.00  | 0.00  | 0.00 | 1.00E+00 | no |
| Ssx9       | 0.00  | 0.00  | 0.00 | 1.00E+00 | no |
| Ssxb1      | 0.00  | 0.00  | 0.00 | 1.00E+00 | no |
| Ssxb10     | 0.00  | 0.00  | 0.00 | 1.00E+00 | no |
| Ssxb2      | 0.00  | 0.00  | 0.00 | 1.00E+00 | no |
| Ssxb3      | 0.00  | 0.00  | 0.00 | 1.00E+00 | no |
| Ssxb5      | 0.00  | 0.00  | 0.00 | 1.00E+00 | no |
| Ssxb8      | 0.00  | 0.00  | 0.00 | 1.00E+00 | no |
| Ssxb9      | 0.00  | 0.00  | 0.00 | 1.00E+00 | no |
| St6gal2    | 0.00  | 0.00  | 0.00 | 1.00E+00 | no |
| St6galnac1 | 0.00  | 0.00  | 0.00 | 1.00E+00 | no |
| St8sia3    | 0.00  | 0.00  | 0.00 | 1.00E+00 | no |
| St8sia5    | 0.00  | 0.00  | 0.00 | 1.00E+00 | no |
| Stard13    | 0.00  | 0.00  | 0.00 | 1.00E+00 | no |
| Stc1       | 0.00  | 0.00  | 0.00 | 1.00E+00 | no |
| Steap2     | 0.00  | 0.00  | 0.00 | 1.00E+00 | no |
| Stfa2      | 0.00  | 0.00  | 0.00 | 1.00E+00 | no |
| Stfa3      | 0.00  | 0.00  | 0.00 | 1.00E+00 | no |
| Stk31      | 0.00  | 0.00  | 0.00 | 1.00E+00 | no |
| Stk32a     | 0.00  | 0.00  | 0.00 | 1.00E+00 | no |
| Stk33      | 0.00  | 0.00  | 0.00 | 1.00E+00 | no |
| Stmn2      | 0.00  | 0.00  | 0.00 | 1.00E+00 | no |
| Stra6      | 0.00  | 0.00  | 0.00 | 1.00E+00 | no |
| Stra8      | 0.00  | 0.00  | 0.00 | 1.00E+00 | no |
| Stx1b      | 0.00  | 0.00  | 0.00 | 1.00E+00 | no |
| Stxbp5l    | 0.00  | 0.00  | 0.00 | 1.00E+00 | no |
| Sucnr1     | 0.00  | 0.00  | 0.00 | 1.00E+00 | no |
| Sulf1      | 0.00  | 0.00  | 0.00 | 1.00E+00 | no |
| Sult1b1    | 0.00  | 0.00  | 0.00 | 1.00E+00 | no |
| Sult1c1    | 0.00  | 0.00  | 0.00 | 1.00E+00 | no |
| Sult1c2    | 0.00  | 0.00  | 0.00 | 1.00E+00 | no |
| Sult1d1    | 0.00  | 0.00  | 0.00 | 1.00E+00 | no |
| Sult1e1    | 0.00  | 0.00  | 0.00 | 1.00E+00 | no |
| Sult2a1    | 0.00  | 0.00  | 0.00 | 1.00E+00 | no |
| Sult2a2    | 0.00  | 0.00  | 0.00 | 1.00E+00 | no |

|         |      |      |      |          |    |
|---------|------|------|------|----------|----|
| Sult2a3 | 0.00 | 0.00 | 0.00 | 1.00E+00 | no |
| Sult2a4 | 0.00 | 0.00 | 0.00 | 1.00E+00 | no |
| Sult2a5 | 0.00 | 0.00 | 0.00 | 1.00E+00 | no |
| Sult2a6 | 0.00 | 0.00 | 0.00 | 1.00E+00 | no |
| Sult2a7 | 0.00 | 0.00 | 0.00 | 1.00E+00 | no |
| Sult3a1 | 0.00 | 0.00 | 0.00 | 1.00E+00 | no |
| Sun3    | 0.00 | 0.00 | 0.00 | 1.00E+00 | no |
| Sun5    | 0.00 | 0.00 | 0.00 | 1.00E+00 | no |
| Susd5   | 0.00 | 0.00 | 0.00 | 1.00E+00 | no |
| Sv2b    | 0.18 | 0.00 | 0.00 | 1.00E+00 | no |
| Sva     | 0.00 | 0.00 | 0.00 | 1.00E+00 | no |
| Sval1   | 0.00 | 0.00 | 0.00 | 1.00E+00 | no |
| Sval2   | 0.00 | 0.00 | 0.00 | 1.00E+00 | no |
| Sval3   | 0.00 | 0.00 | 0.00 | 1.00E+00 | no |
| Svop    | 0.00 | 0.00 | 0.00 | 1.00E+00 | no |
| Svs1    | 0.00 | 0.00 | 0.00 | 1.00E+00 | no |
| Svs2    | 0.00 | 0.00 | 0.00 | 1.00E+00 | no |
| Svs3a   | 0.00 | 0.00 | 0.00 | 1.00E+00 | no |
| Svs3b   | 0.00 | 0.00 | 0.00 | 1.00E+00 | no |
| Svs4    | 0.00 | 0.00 | 0.00 | 1.00E+00 | no |
| Svs5    | 0.00 | 0.00 | 0.00 | 1.00E+00 | no |
| Svs6    | 0.00 | 0.00 | 0.00 | 1.00E+00 | no |
| Sybu    | 0.00 | 0.00 | 0.00 | 1.00E+00 | no |
| Sycn    | 0.00 | 0.00 | 0.00 | 1.00E+00 | no |
| Syn2    | 0.00 | 0.00 | 0.00 | 1.00E+00 | no |
| Synpr   | 0.00 | 0.00 | 0.00 | 1.00E+00 | no |
| Syt10   | 0.00 | 0.00 | 0.00 | 1.00E+00 | no |
| Syt17   | 0.00 | 0.00 | 0.00 | 1.00E+00 | no |
| Syt3    | 0.00 | 0.00 | 0.00 | 1.00E+00 | no |
| Syt4    | 0.00 | 0.00 | 0.00 | 1.00E+00 | no |
| Syt5    | 0.00 | 0.00 | 0.00 | 1.00E+00 | no |
| Syt6    | 0.00 | 0.00 | 0.00 | 1.00E+00 | no |
| Syt7    | 0.00 | 0.00 | 0.00 | 1.00E+00 | no |
| Syt8    | 0.00 | 0.00 | 0.00 | 1.00E+00 | no |
| Syt15   | 0.00 | 0.00 | 0.00 | 1.00E+00 | no |
| Taar1   | 0.00 | 0.00 | 0.00 | 1.00E+00 | no |
| Taar2   | 0.00 | 0.00 | 0.00 | 1.00E+00 | no |
| Taar3   | 0.00 | 0.00 | 0.00 | 1.00E+00 | no |
| Taar4   | 0.00 | 0.00 | 0.00 | 1.00E+00 | no |
| Taar5   | 0.00 | 0.00 | 0.00 | 1.00E+00 | no |
| Taar6   | 0.00 | 0.00 | 0.00 | 1.00E+00 | no |
| Taar7a  | 0.00 | 0.00 | 0.00 | 1.00E+00 | no |

|          |      |      |      |          |    |
|----------|------|------|------|----------|----|
| Taar7b   | 0.00 | 0.00 | 0.00 | 1.00E+00 | no |
| Taar7d   | 0.00 | 0.00 | 0.00 | 1.00E+00 | no |
| Taar7e   | 0.00 | 0.00 | 0.00 | 1.00E+00 | no |
| Taar7f   | 0.00 | 0.00 | 0.00 | 1.00E+00 | no |
| Taar8a   | 0.00 | 0.00 | 0.00 | 1.00E+00 | no |
| Taar8b   | 0.00 | 0.00 | 0.00 | 1.00E+00 | no |
| Taar8c   | 0.00 | 0.00 | 0.00 | 1.00E+00 | no |
| Taar9    | 0.00 | 0.00 | 0.00 | 1.00E+00 | no |
| Tac1     | 0.00 | 0.00 | 0.00 | 1.00E+00 | no |
| Tac2     | 0.00 | 0.00 | 0.00 | 1.00E+00 | no |
| Tacr1    | 0.00 | 0.00 | 0.00 | 1.00E+00 | no |
| Tacr3    | 0.00 | 0.00 | 0.00 | 1.00E+00 | no |
| Taf1a    | 0.00 | 0.00 | 0.00 | 1.00E+00 | no |
| Taf7l    | 0.00 | 0.00 | 0.00 | 1.00E+00 | no |
| Tal2     | 0.00 | 0.00 | 0.00 | 1.00E+00 | no |
| Tas1r2   | 0.00 | 0.00 | 0.00 | 1.00E+00 | no |
| Tas2r102 | 0.00 | 0.00 | 0.00 | 1.00E+00 | no |
| Tas2r103 | 0.00 | 0.00 | 0.00 | 1.00E+00 | no |
| Tas2r104 | 0.00 | 0.00 | 0.00 | 1.00E+00 | no |
| Tas2r105 | 0.00 | 0.00 | 0.00 | 1.00E+00 | no |
| Tas2r106 | 0.00 | 0.00 | 0.00 | 1.00E+00 | no |
| Tas2r107 | 0.00 | 0.00 | 0.00 | 1.00E+00 | no |
| Tas2r109 | 0.00 | 0.00 | 0.00 | 1.00E+00 | no |
| Tas2r110 | 0.00 | 0.00 | 0.00 | 1.00E+00 | no |
| Tas2r113 | 0.00 | 0.00 | 0.00 | 1.00E+00 | no |
| Tas2r114 | 0.00 | 0.00 | 0.00 | 1.00E+00 | no |
| Tas2r115 | 0.00 | 0.00 | 0.00 | 1.00E+00 | no |
| Tas2r116 | 0.00 | 0.00 | 0.00 | 1.00E+00 | no |
| Tas2r117 | 0.00 | 0.00 | 0.00 | 1.00E+00 | no |
| Tas2r118 | 0.00 | 0.00 | 0.00 | 1.00E+00 | no |
| Tas2r119 | 0.00 | 0.00 | 0.00 | 1.00E+00 | no |
| Tas2r120 | 0.00 | 0.00 | 0.00 | 1.00E+00 | no |
| Tas2r121 | 0.00 | 0.00 | 0.00 | 1.00E+00 | no |
| Tas2r122 | 0.00 | 0.00 | 0.00 | 1.00E+00 | no |
| Tas2r123 | 0.00 | 0.00 | 0.00 | 1.00E+00 | no |
| Tas2r124 | 0.00 | 0.00 | 0.00 | 1.00E+00 | no |
| Tas2r125 | 0.00 | 0.00 | 0.00 | 1.00E+00 | no |
| Tas2r126 | 0.00 | 0.00 | 0.00 | 1.00E+00 | no |
| Tas2r129 | 0.00 | 0.00 | 0.00 | 1.00E+00 | no |
| Tas2r130 | 0.00 | 0.00 | 0.00 | 1.00E+00 | no |
| Tas2r131 | 0.00 | 0.00 | 0.00 | 1.00E+00 | no |
| Tas2r134 | 0.00 | 0.00 | 0.00 | 1.00E+00 | no |

|          |        |        |      |          |    |
|----------|--------|--------|------|----------|----|
| Tas2r135 | 0.00   | 0.00   | 0.00 | 1.00E+00 | no |
| Tas2r136 | 0.00   | 0.00   | 0.00 | 1.00E+00 | no |
| Tas2r138 | 0.00   | 0.00   | 0.00 | 1.00E+00 | no |
| Tas2r139 | 0.00   | 0.00   | 0.00 | 1.00E+00 | no |
| Tas2r140 | 0.00   | 0.00   | 0.00 | 1.00E+00 | no |
| Tas2r143 | 0.00   | 0.00   | 0.00 | 1.00E+00 | no |
| Tas2r144 | 0.00   | 0.00   | 0.00 | 1.00E+00 | no |
| Tat      | 0.00   | 0.00   | 0.00 | 1.00E+00 | no |
| Tbc1d21  | 0.00   | 0.00   | 0.00 | 1.00E+00 | no |
| Tbpl2    | 0.00   | 0.00   | 0.00 | 1.00E+00 | no |
| Tbx10    | 0.00   | 0.00   | 0.00 | 1.00E+00 | no |
| Tbx18    | 0.00   | 0.00   | 0.00 | 1.00E+00 | no |
| Tbx20    | 0.00   | 0.00   | 0.00 | 1.00E+00 | no |
| Tbx22    | 0.00   | 0.00   | 0.00 | 1.00E+00 | no |
| Tbx3     | 0.00   | 0.00   | 0.00 | 1.00E+00 | no |
| Tbx4     | 0.00   | 0.00   | 0.00 | 1.00E+00 | no |
| Tbx5     | 0.00   | 0.00   | 0.00 | 1.00E+00 | no |
| Tc2n     | 0.00   | 0.00   | 0.00 | 1.00E+00 | no |
| Tceal3   | 0.00   | 0.00   | 0.00 | 1.00E+00 | no |
| Tceal5   | 0.00   | 0.00   | 0.00 | 1.00E+00 | no |
| Tceal6   | 0.00   | 0.00   | 0.00 | 1.00E+00 | no |
| Tceal7   | 0.00   | 0.00   | 0.00 | 1.00E+00 | no |
| Tcerg1l  | 0.00   | 0.00   | 0.00 | 1.00E+00 | no |
| Tcf21    | 0.00   | 0.00   | 0.00 | 1.00E+00 | no |
| Tcf3     | 144.56 | 131.66 | 0.00 | 1.00E+00 | no |
| Tcfap2a  | 0.00   | 0.00   | 0.00 | 1.00E+00 | no |
| Tcfap2b  | 0.00   | 0.00   | 0.00 | 1.00E+00 | no |
| Tcfap2c  | 0.00   | 0.00   | 0.00 | 1.00E+00 | no |
| Tcfap2d  | 0.00   | 0.00   | 0.00 | 1.00E+00 | no |
| Tcfap2e  | 0.00   | 0.00   | 0.00 | 1.00E+00 | no |
| Tchhl1   | 0.00   | 0.00   | 0.00 | 1.00E+00 | no |
| Tcl1     | 0.00   | 0.00   | 0.00 | 1.00E+00 | no |
| Tcl1b1   | 0.00   | 0.00   | 0.00 | 1.00E+00 | no |
| Tcl1b2   | 0.00   | 0.00   | 0.00 | 1.00E+00 | no |
| Tcl1b3   | 0.00   | 0.00   | 0.00 | 1.00E+00 | no |
| Tcl1b4   | 0.00   | 0.00   | 0.00 | 1.00E+00 | no |
| Tcl1b5   | 0.00   | 0.00   | 0.00 | 1.00E+00 | no |
| Tcp10a   | 0.00   | 0.00   | 0.00 | 1.00E+00 | no |
| Tcp10b   | 0.00   | 0.00   | 0.00 | 1.00E+00 | no |
| Tcp10c   | 0.00   | 0.00   | 0.00 | 1.00E+00 | no |
| Tcstv1   | 0.00   | 0.00   | 0.00 | 1.00E+00 | no |
| Tcstv3   | 0.00   | 0.00   | 0.00 | 1.00E+00 | no |

|                   |       |       |      |          |    |
|-------------------|-------|-------|------|----------|----|
| Tcte1             | 0.00  | 0.00  | 0.00 | 1.00E+00 | no |
| Tcte2             | 0.00  | 0.00  | 0.00 | 1.00E+00 | no |
| Tctex1d1          | 0.00  | 0.00  | 0.00 | 1.00E+00 | no |
| Tdh               | 0.00  | 0.00  | 0.00 | 1.00E+00 | no |
| Tdpoz1            | 0.00  | 0.00  | 0.00 | 1.00E+00 | no |
| Tdpoz2            | 0.00  | 0.00  | 0.00 | 1.00E+00 | no |
| Tdpoz3            | 0.00  | 0.00  | 0.00 | 1.00E+00 | no |
| Tdpoz4            | 0.00  | 0.00  | 0.00 | 1.00E+00 | no |
| Tdpoz5            | 0.00  | 0.00  | 0.00 | 1.00E+00 | no |
| Tdrd1             | 0.00  | 0.00  | 0.00 | 1.00E+00 | no |
| Tdrd6             | 0.00  | 0.00  | 0.00 | 1.00E+00 | no |
| Tead4             | 0.00  | 0.00  | 0.00 | 1.00E+00 | no |
| Tecrl             | 0.00  | 0.00  | 0.00 | 1.00E+00 | no |
| Teddm1            | 0.00  | 0.00  | 0.00 | 1.00E+00 | no |
| Tekt3             | 0.00  | 0.00  | 0.00 | 1.00E+00 | no |
| Tepp              | 0.00  | 0.00  | 0.00 | 1.00E+00 | no |
| Tex13             | 0.00  | 0.00  | 0.00 | 1.00E+00 | no |
| Tex13a            | 0.00  | 0.00  | 0.00 | 1.00E+00 | no |
| Tex14             | 0.00  | 0.00  | 0.00 | 1.00E+00 | no |
| Tex16             | 0.00  | 0.00  | 0.00 | 1.00E+00 | no |
| Tex19.1           | 0.00  | 0.00  | 0.00 | 1.00E+00 | no |
| Tex19.2           | 0.00  | 0.00  | 0.00 | 1.00E+00 | no |
| Tex21             | 0.00  | 0.00  | 0.00 | 1.00E+00 | no |
| Tex22             | 0.00  | 0.00  | 0.00 | 1.00E+00 | no |
| Tex24             | 0.00  | 0.00  | 0.00 | 1.00E+00 | no |
| Tex28             | 0.00  | 0.00  | 0.00 | 1.00E+00 | no |
| Tfdp2             | 23.97 | 21.49 | 0.00 | 1.00E+00 | no |
| Tfpi2             | 0.00  | 0.00  | 0.00 | 1.00E+00 | no |
| Tgif2lx1,Tgif2lx2 | 0.00  | 0.00  | 0.00 | 1.00E+00 | no |
| Tgif2lx2          | 0.00  | 0.00  | 0.00 | 1.00E+00 | no |
| Tgm5              | 0.00  | 0.00  | 0.00 | 1.00E+00 | no |
| Tgm7              | 0.00  | 0.00  | 0.00 | 1.00E+00 | no |
| Tgtp1,Tgtp2       | 0.05  | 5.99  | 0.00 | 1.00E+00 | no |
| Tgtp2             | 15.94 | 28.90 | 0.00 | 1.00E+00 | no |
| Th                | 0.00  | 0.00  | 0.00 | 1.00E+00 | no |
| Them5             | 0.00  | 0.00  | 0.00 | 1.00E+00 | no |
| Thpo              | 0.00  | 0.00  | 0.00 | 1.00E+00 | no |
| Thsd7a            | 0.00  | 0.00  | 0.00 | 1.00E+00 | no |
| Tigit             | 0.00  | 0.00  | 0.00 | 1.00E+00 | no |
| Timp1             | 0.00  | 0.00  | 0.00 | 1.00E+00 | no |
| Timp4             | 0.00  | 0.00  | 0.00 | 1.00E+00 | no |
| Tinag             | 0.00  | 0.00  | 0.00 | 1.00E+00 | no |

|          |       |       |      |          |    |
|----------|-------|-------|------|----------|----|
| Tinagl1  | 0.00  | 0.00  | 0.00 | 1.00E+00 | no |
| Tjp1     | 0.00  | 0.00  | 0.00 | 1.00E+00 | no |
| Tktl2    | 0.00  | 0.00  | 0.00 | 1.00E+00 | no |
| Tll1     | 0.00  | 0.00  | 0.00 | 1.00E+00 | no |
| Tlx1     | 0.00  | 0.00  | 0.00 | 1.00E+00 | no |
| Tlx2     | 0.00  | 0.00  | 0.00 | 1.00E+00 | no |
| Tlx3     | 0.00  | 0.00  | 0.00 | 1.00E+00 | no |
| Tm4sf1   | 0.00  | 0.00  | 0.00 | 1.00E+00 | no |
| Tm4sf19  | 0.00  | 0.00  | 0.00 | 1.00E+00 | no |
| Tm4sf4   | 0.00  | 0.00  | 0.00 | 1.00E+00 | no |
| Tm4sf5   | 0.00  | 0.00  | 0.00 | 1.00E+00 | no |
| Tm7sf4   | 0.00  | 0.00  | 0.00 | 1.00E+00 | no |
| Tmc8     | 16.48 | 20.70 | 0.00 | 1.00E+00 | no |
| Tmcc3    | 0.00  | 0.00  | 0.00 | 1.00E+00 | no |
| Tmco2    | 0.00  | 0.00  | 0.00 | 1.00E+00 | no |
| Tmco5    | 0.00  | 0.00  | 0.00 | 1.00E+00 | no |
| Tmco5b   | 0.00  | 0.00  | 0.00 | 1.00E+00 | no |
| Tmed11   | 0.00  | 0.00  | 0.00 | 1.00E+00 | no |
| Tmed6    | 0.00  | 0.00  | 0.00 | 1.00E+00 | no |
| Tmeff2   | 0.00  | 0.00  | 0.00 | 1.00E+00 | no |
| Tmem102  | 0.00  | 0.00  | 0.00 | 1.00E+00 | no |
| Tmem114  | 0.00  | 0.00  | 0.00 | 1.00E+00 | no |
| Tmem116  | 0.00  | 0.00  | 0.00 | 1.00E+00 | no |
| Tmem117  | 0.00  | 0.00  | 0.00 | 1.00E+00 | no |
| Tmem125  | 0.00  | 0.00  | 0.00 | 1.00E+00 | no |
| Tmem132c | 0.00  | 0.00  | 0.00 | 1.00E+00 | no |
| Tmem169  | 0.00  | 0.00  | 0.00 | 1.00E+00 | no |
| Tmem171  | 0.00  | 0.00  | 0.00 | 1.00E+00 | no |
| Tmem174  | 0.00  | 0.00  | 0.00 | 1.00E+00 | no |
| Tmem175  | 8.95  | 11.31 | 0.00 | 1.00E+00 | no |
| Tmem179  | 0.00  | 0.00  | 0.00 | 1.00E+00 | no |
| Tmem182  | 0.00  | 0.00  | 0.00 | 1.00E+00 | no |
| Tmem183a | 26.66 | 24.07 | 0.00 | 1.00E+00 | no |
| Tmem184a | 0.00  | 0.00  | 0.00 | 1.00E+00 | no |
| Tmem196  | 0.00  | 0.00  | 0.00 | 1.00E+00 | no |
| Tmem200a | 0.00  | 0.00  | 0.00 | 1.00E+00 | no |
| Tmem207  | 0.00  | 0.00  | 0.00 | 1.00E+00 | no |
| Tmem210  | 0.00  | 0.00  | 0.00 | 1.00E+00 | no |
| Tmem211  | 0.00  | 0.00  | 0.00 | 1.00E+00 | no |
| Tmem212  | 0.00  | 0.00  | 0.00 | 1.00E+00 | no |
| Tmem213  | 0.00  | 0.00  | 0.00 | 1.00E+00 | no |
| Tmem215  | 0.00  | 0.00  | 0.00 | 1.00E+00 | no |



|             |      |      |      |          |    |
|-------------|------|------|------|----------|----|
| Tmem217     | 0.00 | 0.00 | 0.00 | 1.00E+00 | no |
| Tmem225     | 0.00 | 0.00 | 0.00 | 1.00E+00 | no |
| Tmem229a    | 0.00 | 0.00 | 0.00 | 1.00E+00 | no |
| Tmem232     | 0.00 | 0.00 | 0.00 | 1.00E+00 | no |
| Tmem233     | 0.00 | 0.00 | 0.00 | 1.00E+00 | no |
| Tmem27      | 0.00 | 0.00 | 0.00 | 1.00E+00 | no |
| Tmem28      | 0.00 | 0.00 | 0.00 | 1.00E+00 | no |
| Tmem30b     | 0.00 | 0.00 | 0.00 | 1.00E+00 | no |
| Tmem37      | 0.00 | 0.00 | 0.00 | 1.00E+00 | no |
| Tmem45a     | 0.00 | 0.00 | 0.00 | 1.00E+00 | no |
| Tmem52      | 0.00 | 0.00 | 0.00 | 1.00E+00 | no |
| Tmem54      | 0.00 | 0.00 | 0.00 | 1.00E+00 | no |
| Tmem72      | 0.00 | 0.00 | 0.00 | 1.00E+00 | no |
| Tmem89      | 0.00 | 0.00 | 0.00 | 1.00E+00 | no |
| Tmem90b     | 0.00 | 0.00 | 0.00 | 1.00E+00 | no |
| Tmem92-ps   | 0.00 | 0.00 | 0.00 | 1.00E+00 | no |
| Tmigd1      | 0.00 | 0.00 | 0.00 | 1.00E+00 | no |
| Tmlhe       | 0.00 | 0.00 | 0.00 | 1.00E+00 | no |
| Tmod2       | 0.00 | 0.00 | 0.00 | 1.00E+00 | no |
| Tmprss11a   | 0.00 | 0.00 | 0.00 | 1.00E+00 | no |
| Tmprss11bnl | 0.00 | 0.00 | 0.00 | 1.00E+00 | no |
| Tmprss11c   | 0.00 | 0.00 | 0.00 | 1.00E+00 | no |
| Tmprss11d   | 0.00 | 0.00 | 0.00 | 1.00E+00 | no |
| Tmprss11e   | 0.00 | 0.00 | 0.00 | 1.00E+00 | no |
| Tmprss11f   | 0.00 | 0.00 | 0.00 | 1.00E+00 | no |
| Tmprss12    | 0.00 | 0.00 | 0.00 | 1.00E+00 | no |
| Tmprss15    | 0.00 | 0.00 | 0.00 | 1.00E+00 | no |
| Tmprss5     | 0.00 | 0.00 | 0.00 | 1.00E+00 | no |
| Tmprss6     | 0.00 | 0.00 | 0.00 | 1.00E+00 | no |
| Tmsb15a     | 0.00 | 0.00 | 0.00 | 1.00E+00 | no |
| Tnc         | 0.00 | 0.00 | 0.00 | 1.00E+00 | no |
| Tnfrsf11b   | 0.00 | 0.00 | 0.00 | 1.00E+00 | no |
| Tnfrsf9     | 0.00 | 0.00 | 0.00 | 1.00E+00 | no |
| Tnfsf12     | 0.00 | 0.00 | 0.00 | 1.00E+00 | no |
| Tnfsf13     | 0.00 | 0.00 | 0.00 | 1.00E+00 | no |
| Tnmd        | 0.00 | 0.00 | 0.00 | 1.00E+00 | no |
| Tnni1       | 0.00 | 0.00 | 0.00 | 1.00E+00 | no |
| Tnni3k      | 0.00 | 0.00 | 0.00 | 1.00E+00 | no |
| Tnp1        | 0.00 | 0.00 | 0.00 | 1.00E+00 | no |
| Tomm20l     | 0.00 | 0.00 | 0.00 | 1.00E+00 | no |
| Tox2        | 0.00 | 0.00 | 0.00 | 1.00E+00 | no |
| Tpbg        | 0.00 | 0.00 | 0.00 | 1.00E+00 | no |

|             |       |       |      |          |    |
|-------------|-------|-------|------|----------|----|
| Tpbpa       | 0.00  | 0.00  | 0.00 | 1.00E+00 | no |
| Tpbpb       | 0.00  | 0.00  | 0.00 | 1.00E+00 | no |
| Tpd52l1     | 0.00  | 0.00  | 0.00 | 1.00E+00 | no |
| Tph1        | 0.00  | 0.00  | 0.00 | 1.00E+00 | no |
| Tph2        | 0.00  | 0.00  | 0.00 | 1.00E+00 | no |
| Tpo         | 0.00  | 0.00  | 0.00 | 1.00E+00 | no |
| Tppp2       | 0.00  | 0.00  | 0.00 | 1.00E+00 | no |
| Tprg        | 0.00  | 0.00  | 0.00 | 1.00E+00 | no |
| Tpsab1      | 0.00  | 0.00  | 0.00 | 1.00E+00 | no |
| Tpsb2       | 0.00  | 0.00  | 0.00 | 1.00E+00 | no |
| Tpsg1       | 0.00  | 0.00  | 0.00 | 1.00E+00 | no |
| Tpx2        | 62.54 | 33.57 | 0.00 | 1.00E+00 | no |
| Tram1l1     | 0.00  | 0.00  | 0.00 | 1.00E+00 | no |
| Trank1      | 0.00  | 0.00  | 0.00 | 1.00E+00 | no |
| Trat1       | 0.00  | 0.00  | 0.00 | 1.00E+00 | no |
| Trdn        | 0.00  | 0.00  | 0.00 | 1.00E+00 | no |
| Treh        | 0.00  | 0.00  | 0.00 | 1.00E+00 | no |
| Treml1      | 0.00  | 0.00  | 0.00 | 1.00E+00 | no |
| Treml4      | 0.00  | 0.00  | 0.00 | 1.00E+00 | no |
| Trex2       | 0.00  | 0.00  | 0.00 | 1.00E+00 | no |
| Trh         | 0.00  | 0.00  | 0.00 | 1.00E+00 | no |
| Trhr        | 0.00  | 0.00  | 0.00 | 1.00E+00 | no |
| Trim29      | 0.00  | 0.00  | 0.00 | 1.00E+00 | no |
| Trim30e-ps1 | 0.00  | 0.00  | 0.00 | 1.00E+00 | no |
| Trim31      | 0.00  | 0.00  | 0.00 | 1.00E+00 | no |
| Trim32      | 10.26 | 12.60 | 0.00 | 1.00E+00 | no |
| Trim40      | 0.00  | 0.00  | 0.00 | 1.00E+00 | no |
| Trim42      | 0.00  | 0.00  | 0.00 | 1.00E+00 | no |
| Trim52      | 0.00  | 0.00  | 0.00 | 1.00E+00 | no |
| Trim54      | 0.00  | 0.00  | 0.00 | 1.00E+00 | no |
| Trim55      | 0.00  | 0.00  | 0.00 | 1.00E+00 | no |
| Trim61      | 0.00  | 0.00  | 0.00 | 1.00E+00 | no |
| Trim66      | 0.00  | 0.00  | 0.00 | 1.00E+00 | no |
| Trim67      | 0.00  | 0.00  | 0.00 | 1.00E+00 | no |
| Trim71      | 0.00  | 0.00  | 0.00 | 1.00E+00 | no |
| Trim9       | 0.00  | 0.00  | 0.00 | 1.00E+00 | no |
| Triml1      | 0.00  | 0.00  | 0.00 | 1.00E+00 | no |
| Triml2      | 0.00  | 0.00  | 0.00 | 1.00E+00 | no |
| Trp63       | 0.00  | 0.00  | 0.00 | 1.00E+00 | no |
| Trp73       | 0.00  | 0.00  | 0.00 | 1.00E+00 | no |
| Trpc7       | 0.00  | 0.00  | 0.00 | 1.00E+00 | no |
| Trpd52l3    | 0.00  | 0.00  | 0.00 | 1.00E+00 | no |

|         |      |      |      |          |    |
|---------|------|------|------|----------|----|
| Trpm3   | 0.00 | 0.00 | 0.00 | 1.00E+00 | no |
| Trpm8   | 0.00 | 0.00 | 0.00 | 1.00E+00 | no |
| Trpv5   | 0.00 | 0.00 | 0.00 | 1.00E+00 | no |
| Try10   | 0.00 | 0.00 | 0.00 | 1.00E+00 | no |
| Try4    | 0.00 | 0.00 | 0.00 | 1.00E+00 | no |
| Try5    | 0.00 | 0.00 | 0.00 | 1.00E+00 | no |
| Tsga8   | 0.00 | 0.00 | 0.00 | 1.00E+00 | no |
| Tsku    | 0.00 | 0.00 | 0.00 | 1.00E+00 | no |
| Tspan10 | 0.00 | 0.00 | 0.00 | 1.00E+00 | no |
| Tspan11 | 0.00 | 0.00 | 0.00 | 1.00E+00 | no |
| Tspan12 | 0.00 | 0.00 | 0.00 | 1.00E+00 | no |
| Tspan8  | 0.00 | 0.00 | 0.00 | 1.00E+00 | no |
| Tspy-ps | 0.00 | 0.00 | 0.00 | 1.00E+00 | no |
| Tspyl5  | 0.00 | 0.00 | 0.00 | 1.00E+00 | no |
| Tssk3   | 0.00 | 0.00 | 0.00 | 1.00E+00 | no |
| Ttc18   | 0.00 | 0.00 | 0.00 | 1.00E+00 | no |
| Ttc22   | 0.00 | 0.00 | 0.00 | 1.00E+00 | no |
| Ttc23l  | 0.00 | 0.00 | 0.00 | 1.00E+00 | no |
| Ttc24   | 0.00 | 0.00 | 0.00 | 1.00E+00 | no |
| Ttc29   | 0.00 | 0.00 | 0.00 | 1.00E+00 | no |
| Ttc34   | 0.00 | 0.00 | 0.00 | 1.00E+00 | no |
| Ttc39a  | 0.00 | 0.00 | 0.00 | 1.00E+00 | no |
| Ttc9    | 0.00 | 0.00 | 0.00 | 1.00E+00 | no |
| Ttc9b   | 0.00 | 0.00 | 0.00 | 1.00E+00 | no |
| Ttl16   | 0.00 | 0.00 | 0.00 | 1.00E+00 | no |
| Ttl17   | 0.00 | 0.00 | 0.00 | 1.00E+00 | no |
| Ttl18   | 0.00 | 0.00 | 0.00 | 1.00E+00 | no |
| Ttr     | 0.00 | 0.00 | 0.00 | 1.00E+00 | no |
| Tubb1   | 0.00 | 0.00 | 0.00 | 1.00E+00 | no |
| Tulp1   | 0.00 | 0.00 | 0.00 | 1.00E+00 | no |
| Tulp2   | 0.00 | 0.00 | 0.00 | 1.00E+00 | no |
| Tusc5   | 0.00 | 0.00 | 0.00 | 1.00E+00 | no |
| Twist1  | 0.00 | 0.00 | 0.00 | 1.00E+00 | no |
| Twist2  | 0.00 | 0.00 | 0.00 | 1.00E+00 | no |
| Txk     | 0.00 | 0.00 | 0.00 | 1.00E+00 | no |
| Txndc2  | 0.00 | 0.00 | 0.00 | 1.00E+00 | no |
| Txndc3  | 0.00 | 0.00 | 0.00 | 1.00E+00 | no |
| Txndc6  | 0.00 | 0.00 | 0.00 | 1.00E+00 | no |
| Txndc8  | 0.00 | 0.00 | 0.00 | 1.00E+00 | no |
| Tymp    | 0.93 | 0.85 | 0.00 | 1.00E+00 | no |
| Tyr     | 0.00 | 0.00 | 0.00 | 1.00E+00 | no |
| Tyrp1   | 0.00 | 0.00 | 0.00 | 1.00E+00 | no |

|         |        |        |      |          |    |
|---------|--------|--------|------|----------|----|
| U46068  | 0.00   | 0.00   | 0.00 | 1.00E+00 | no |
| U90926  | 0.00   | 0.00   | 0.00 | 1.00E+00 | no |
| Ubap2l  | 71.88  | 65.00  | 0.00 | 1.00E+00 | no |
| Ube2dnl | 0.00   | 0.00   | 0.00 | 1.00E+00 | no |
| Ube2u   | 0.00   | 0.00   | 0.00 | 1.00E+00 | no |
| Ubl4b   | 0.00   | 0.00   | 0.00 | 1.00E+00 | no |
| Ubqlnl  | 0.00   | 0.00   | 0.00 | 1.00E+00 | no |
| Ubtfl1  | 0.00   | 0.00   | 0.00 | 1.00E+00 | no |
| Ubxn10  | 0.00   | 0.00   | 0.00 | 1.00E+00 | no |
| Ucma    | 0.00   | 0.00   | 0.00 | 1.00E+00 | no |
| Ucn     | 0.00   | 0.00   | 0.00 | 1.00E+00 | no |
| Ucn3    | 0.00   | 0.00   | 0.00 | 1.00E+00 | no |
| Ucp1    | 0.00   | 0.00   | 0.00 | 1.00E+00 | no |
| Ugt1a1  | 0.00   | 0.00   | 0.00 | 1.00E+00 | no |
| Ugt1a10 | 0.00   | 0.00   | 0.00 | 1.00E+00 | no |
| Ugt1a2  | 0.00   | 0.00   | 0.00 | 1.00E+00 | no |
| Ugt1a5  | 0.00   | 0.00   | 0.00 | 1.00E+00 | no |
| Ugt1a6a | 0.07   | 0.00   | 0.00 | 1.00E+00 | no |
| Ugt1a6b | 0.00   | 0.00   | 0.00 | 1.00E+00 | no |
| Ugt1a9  | 0.00   | 0.00   | 0.00 | 1.00E+00 | no |
| Ugt2a1  | 0.00   | 0.00   | 0.00 | 1.00E+00 | no |
| Ugt2a2  | 0.00   | 0.00   | 0.00 | 1.00E+00 | no |
| Ugt2a3  | 0.00   | 0.00   | 0.00 | 1.00E+00 | no |
| Ugt2b1  | 0.00   | 0.00   | 0.00 | 1.00E+00 | no |
| Ugt2b34 | 0.00   | 0.00   | 0.00 | 1.00E+00 | no |
| Ugt2b35 | 0.00   | 0.00   | 0.00 | 1.00E+00 | no |
| Ugt2b36 | 0.00   | 0.00   | 0.00 | 1.00E+00 | no |
| Ugt2b37 | 0.00   | 0.00   | 0.00 | 1.00E+00 | no |
| Ugt2b38 | 0.00   | 0.00   | 0.00 | 1.00E+00 | no |
| Ugt2b5  | 0.00   | 0.00   | 0.00 | 1.00E+00 | no |
| Uhrf1   | 209.19 | 147.63 | 0.00 | 1.00E+00 | no |
| Ulbp1   | 0.00   | 0.00   | 0.00 | 1.00E+00 | no |
| Umodl1  | 0.00   | 0.00   | 0.00 | 1.00E+00 | no |
| Unc13b  | 0.00   | 0.00   | 0.00 | 1.00E+00 | no |
| Unc13c  | 0.00   | 0.00   | 0.00 | 1.00E+00 | no |
| Unc5c   | 0.00   | 0.00   | 0.00 | 1.00E+00 | no |
| Unc5d   | 0.00   | 0.00   | 0.00 | 1.00E+00 | no |
| Unc80   | 0.00   | 0.00   | 0.00 | 1.00E+00 | no |
| Uox     | 0.00   | 0.00   | 0.00 | 1.00E+00 | no |
| Upk2    | 0.00   | 0.00   | 0.00 | 1.00E+00 | no |
| Upk3a   | 0.00   | 0.00   | 0.00 | 1.00E+00 | no |
| Upk3b   | 0.00   | 0.00   | 0.00 | 1.00E+00 | no |

|               |       |       |      |          |    |
|---------------|-------|-------|------|----------|----|
| Upp1          | 0.00  | 0.00  | 0.00 | 1.00E+00 | no |
| Upp2          | 0.00  | 0.00  | 0.00 | 1.00E+00 | no |
| Uroc1         | 0.00  | 0.00  | 0.00 | 1.00E+00 | no |
| Ush1c         | 0.00  | 0.00  | 0.00 | 1.00E+00 | no |
| Ush1g         | 0.00  | 0.00  | 0.00 | 1.00E+00 | no |
| Ush2a         | 0.00  | 0.00  | 0.00 | 1.00E+00 | no |
| Usp13         | 0.00  | 0.00  | 0.00 | 1.00E+00 | no |
| Usp17I5       | 0.00  | 0.00  | 0.00 | 1.00E+00 | no |
| Usp19         | 42.82 | 41.33 | 0.00 | 1.00E+00 | no |
| Usp26         | 0.00  | 0.00  | 0.00 | 1.00E+00 | no |
| Usp29         | 0.00  | 0.00  | 0.00 | 1.00E+00 | no |
| Uspl1         | 22.83 | 20.78 | 0.00 | 1.00E+00 | no |
| Uts2d         | 0.00  | 0.00  | 0.00 | 1.00E+00 | no |
| Uts2r         | 0.00  | 0.00  | 0.00 | 1.00E+00 | no |
| V1ra8         | 0.00  | 0.00  | 0.00 | 1.00E+00 | no |
| V1rd18,V1rd19 | 0.00  | 0.00  | 0.00 | 1.00E+00 | no |
| V1rd19        | 0.00  | 0.00  | 0.00 | 1.00E+00 | no |
| V1rg10        | 0.00  | 0.00  | 0.00 | 1.00E+00 | no |
| Vamp7         | 0.00  | 0.00  | 0.00 | 1.00E+00 | no |
| Vax1          | 0.00  | 0.00  | 0.00 | 1.00E+00 | no |
| Vax2os1       | 0.00  | 0.00  | 0.00 | 1.00E+00 | no |
| Vax2os2       | 0.00  | 0.00  | 0.00 | 1.00E+00 | no |
| Vegfa         | 19.53 | 41.79 | 0.00 | 1.00E+00 | no |
| Vgll1         | 0.00  | 0.00  | 0.00 | 1.00E+00 | no |
| Vgll2         | 0.00  | 0.00  | 0.00 | 1.00E+00 | no |
| Vip           | 0.00  | 0.00  | 0.00 | 1.00E+00 | no |
| Vit           | 0.00  | 0.00  | 0.00 | 1.00E+00 | no |
| Vldlr         | 0.00  | 0.00  | 0.00 | 1.00E+00 | no |
| Vmn1r-ps103   | 0.00  | 0.00  | 0.00 | 1.00E+00 | no |
| Vmn1r-ps79    | 0.00  | 0.00  | 0.00 | 1.00E+00 | no |
| Vmn1r1        | 0.00  | 0.00  | 0.00 | 1.00E+00 | no |
| Vmn1r10       | 0.00  | 0.00  | 0.00 | 1.00E+00 | no |
| Vmn1r100,Vm   | 0.00  | 0.00  | 0.00 | 1.00E+00 | no |
| Vmn1r101      | 0.00  | 0.00  | 0.00 | 1.00E+00 | no |
| Vmn1r103      | 0.00  | 0.00  | 0.00 | 1.00E+00 | no |
| Vmn1r104      | 0.00  | 0.00  | 0.00 | 1.00E+00 | no |
| Vmn1r109      | 0.00  | 0.00  | 0.00 | 1.00E+00 | no |
| Vmn1r11       | 0.00  | 0.00  | 0.00 | 1.00E+00 | no |
| Vmn1r110      | 0.00  | 0.00  | 0.00 | 1.00E+00 | no |
| Vmn1r111      | 0.00  | 0.00  | 0.00 | 1.00E+00 | no |
| Vmn1r112      | 0.00  | 0.00  | 0.00 | 1.00E+00 | no |
| Vmn1r113      | 0.00  | 0.00  | 0.00 | 1.00E+00 | no |

|             |      |      |      |          |    |
|-------------|------|------|------|----------|----|
| Vmn1r114    | 0.00 | 0.00 | 0.00 | 1.00E+00 | no |
| Vmn1r115    | 0.00 | 0.00 | 0.00 | 1.00E+00 | no |
| Vmn1r116    | 0.00 | 0.00 | 0.00 | 1.00E+00 | no |
| Vmn1r117    | 0.00 | 0.00 | 0.00 | 1.00E+00 | no |
| Vmn1r118    | 0.00 | 0.00 | 0.00 | 1.00E+00 | no |
| Vmn1r119    | 0.00 | 0.00 | 0.00 | 1.00E+00 | no |
| Vmn1r12     | 0.00 | 0.00 | 0.00 | 1.00E+00 | no |
| Vmn1r120    | 0.00 | 0.00 | 0.00 | 1.00E+00 | no |
| Vmn1r121    | 0.00 | 0.00 | 0.00 | 1.00E+00 | no |
| Vmn1r122    | 0.00 | 0.00 | 0.00 | 1.00E+00 | no |
| Vmn1r123    | 0.00 | 0.00 | 0.00 | 1.00E+00 | no |
| Vmn1r124    | 0.00 | 0.00 | 0.00 | 1.00E+00 | no |
| Vmn1r125    | 0.00 | 0.00 | 0.00 | 1.00E+00 | no |
| Vmn1r126    | 0.00 | 0.00 | 0.00 | 1.00E+00 | no |
| Vmn1r127    | 0.00 | 0.00 | 0.00 | 1.00E+00 | no |
| Vmn1r128    | 0.00 | 0.00 | 0.00 | 1.00E+00 | no |
| Vmn1r129    | 0.00 | 0.00 | 0.00 | 1.00E+00 | no |
| Vmn1r13     | 0.00 | 0.00 | 0.00 | 1.00E+00 | no |
| Vmn1r132,Vm | 0.00 | 0.00 | 0.00 | 1.00E+00 | no |
| Vmn1r135    | 0.00 | 0.00 | 0.00 | 1.00E+00 | no |
| Vmn1r139    | 0.00 | 0.00 | 0.00 | 1.00E+00 | no |
| Vmn1r14     | 0.00 | 0.00 | 0.00 | 1.00E+00 | no |
| Vmn1r142    | 0.00 | 0.00 | 0.00 | 1.00E+00 | no |
| Vmn1r143    | 0.00 | 0.00 | 0.00 | 1.00E+00 | no |
| Vmn1r148    | 0.00 | 0.00 | 0.00 | 1.00E+00 | no |
| Vmn1r15     | 0.00 | 0.00 | 0.00 | 1.00E+00 | no |
| Vmn1r151    | 0.00 | 0.00 | 0.00 | 1.00E+00 | no |
| Vmn1r152    | 0.00 | 0.00 | 0.00 | 1.00E+00 | no |
| Vmn1r155    | 0.00 | 0.00 | 0.00 | 1.00E+00 | no |
| Vmn1r158    | 0.00 | 0.00 | 0.00 | 1.00E+00 | no |
| Vmn1r159    | 0.00 | 0.00 | 0.00 | 1.00E+00 | no |
| Vmn1r16     | 0.00 | 0.00 | 0.00 | 1.00E+00 | no |
| Vmn1r160    | 0.00 | 0.00 | 0.00 | 1.00E+00 | no |
| Vmn1r163    | 0.00 | 0.00 | 0.00 | 1.00E+00 | no |
| Vmn1r165    | 0.00 | 0.00 | 0.00 | 1.00E+00 | no |
| Vmn1r167    | 0.00 | 0.00 | 0.00 | 1.00E+00 | no |
| Vmn1r168    | 0.00 | 0.00 | 0.00 | 1.00E+00 | no |
| Vmn1r169    | 0.00 | 0.00 | 0.00 | 1.00E+00 | no |
| Vmn1r17     | 0.00 | 0.00 | 0.00 | 1.00E+00 | no |
| Vmn1r170    | 0.00 | 0.00 | 0.00 | 1.00E+00 | no |
| Vmn1r171    | 0.00 | 0.00 | 0.00 | 1.00E+00 | no |
| Vmn1r172    | 0.00 | 0.00 | 0.00 | 1.00E+00 | no |

|             |      |      |      |          |    |
|-------------|------|------|------|----------|----|
| Vmn1r173    | 0.00 | 0.00 | 0.00 | 1.00E+00 | no |
| Vmn1r174    | 0.00 | 0.00 | 0.00 | 1.00E+00 | no |
| Vmn1r175    | 0.00 | 0.00 | 0.00 | 1.00E+00 | no |
| Vmn1r176    | 0.00 | 0.00 | 0.00 | 1.00E+00 | no |
| Vmn1r177    | 0.00 | 0.00 | 0.00 | 1.00E+00 | no |
| Vmn1r178    | 0.00 | 0.00 | 0.00 | 1.00E+00 | no |
| Vmn1r179    | 0.00 | 0.00 | 0.00 | 1.00E+00 | no |
| Vmn1r18     | 0.00 | 0.00 | 0.00 | 1.00E+00 | no |
| Vmn1r180    | 0.00 | 0.00 | 0.00 | 1.00E+00 | no |
| Vmn1r181    | 0.00 | 0.00 | 0.00 | 1.00E+00 | no |
| Vmn1r183    | 0.00 | 0.00 | 0.00 | 1.00E+00 | no |
| Vmn1r184    | 0.00 | 0.00 | 0.00 | 1.00E+00 | no |
| Vmn1r185    | 0.00 | 0.00 | 0.00 | 1.00E+00 | no |
| Vmn1r186,Vm | 0.00 | 0.00 | 0.00 | 1.00E+00 | no |
| Vmn1r187,Vm | 0.00 | 0.00 | 0.00 | 1.00E+00 | no |
| Vmn1r188    | 0.00 | 0.00 | 0.00 | 1.00E+00 | no |
| Vmn1r189    | 0.00 | 0.00 | 0.00 | 1.00E+00 | no |
| Vmn1r19     | 0.00 | 0.00 | 0.00 | 1.00E+00 | no |
| Vmn1r191    | 0.00 | 0.00 | 0.00 | 1.00E+00 | no |
| Vmn1r192    | 0.00 | 0.00 | 0.00 | 1.00E+00 | no |
| Vmn1r193    | 0.00 | 0.00 | 0.00 | 1.00E+00 | no |
| Vmn1r194    | 0.00 | 0.00 | 0.00 | 1.00E+00 | no |
| Vmn1r195    | 0.00 | 0.00 | 0.00 | 1.00E+00 | no |
| Vmn1r196    | 0.00 | 0.00 | 0.00 | 1.00E+00 | no |
| Vmn1r197    | 0.00 | 0.00 | 0.00 | 1.00E+00 | no |
| Vmn1r198    | 0.00 | 0.00 | 0.00 | 1.00E+00 | no |
| Vmn1r199    | 0.00 | 0.00 | 0.00 | 1.00E+00 | no |
| Vmn1r2      | 0.00 | 0.00 | 0.00 | 1.00E+00 | no |
| Vmn1r20     | 0.00 | 0.00 | 0.00 | 1.00E+00 | no |
| Vmn1r200    | 0.00 | 0.00 | 0.00 | 1.00E+00 | no |
| Vmn1r201    | 0.00 | 0.00 | 0.00 | 1.00E+00 | no |
| Vmn1r202    | 0.00 | 0.00 | 0.00 | 1.00E+00 | no |
| Vmn1r203    | 0.00 | 0.00 | 0.00 | 1.00E+00 | no |
| Vmn1r204    | 0.00 | 0.00 | 0.00 | 1.00E+00 | no |
| Vmn1r205    | 0.00 | 0.00 | 0.00 | 1.00E+00 | no |
| Vmn1r206    | 0.00 | 0.00 | 0.00 | 1.00E+00 | no |
| Vmn1r207-ps | 0.00 | 0.00 | 0.00 | 1.00E+00 | no |
| Vmn1r208    | 0.00 | 0.00 | 0.00 | 1.00E+00 | no |
| Vmn1r209    | 0.00 | 0.00 | 0.00 | 1.00E+00 | no |
| Vmn1r21     | 0.00 | 0.00 | 0.00 | 1.00E+00 | no |
| Vmn1r210    | 0.00 | 0.00 | 0.00 | 1.00E+00 | no |
| Vmn1r211    | 0.00 | 0.00 | 0.00 | 1.00E+00 | no |

|          |      |      |      |          |    |
|----------|------|------|------|----------|----|
| Vmn1r212 | 0.00 | 0.00 | 0.00 | 1.00E+00 | no |
| Vmn1r213 | 0.00 | 0.00 | 0.00 | 1.00E+00 | no |
| Vmn1r214 | 0.00 | 0.00 | 0.00 | 1.00E+00 | no |
| Vmn1r215 | 0.00 | 0.00 | 0.00 | 1.00E+00 | no |
| Vmn1r216 | 0.00 | 0.00 | 0.00 | 1.00E+00 | no |
| Vmn1r217 | 0.00 | 0.00 | 0.00 | 1.00E+00 | no |
| Vmn1r218 | 0.00 | 0.00 | 0.00 | 1.00E+00 | no |
| Vmn1r219 | 0.00 | 0.00 | 0.00 | 1.00E+00 | no |
| Vmn1r22  | 0.00 | 0.00 | 0.00 | 1.00E+00 | no |
| Vmn1r220 | 0.00 | 0.00 | 0.00 | 1.00E+00 | no |
| Vmn1r221 | 0.00 | 0.00 | 0.00 | 1.00E+00 | no |
| Vmn1r222 | 0.00 | 0.00 | 0.00 | 1.00E+00 | no |
| Vmn1r223 | 0.00 | 0.00 | 0.00 | 1.00E+00 | no |
| Vmn1r224 | 0.00 | 0.00 | 0.00 | 1.00E+00 | no |
| Vmn1r225 | 0.00 | 0.00 | 0.00 | 1.00E+00 | no |
| Vmn1r226 | 0.00 | 0.00 | 0.00 | 1.00E+00 | no |
| Vmn1r227 | 0.00 | 0.00 | 0.00 | 1.00E+00 | no |
| Vmn1r228 | 0.00 | 0.00 | 0.00 | 1.00E+00 | no |
| Vmn1r229 | 0.00 | 0.00 | 0.00 | 1.00E+00 | no |
| Vmn1r23  | 0.00 | 0.00 | 0.00 | 1.00E+00 | no |
| Vmn1r230 | 0.00 | 0.00 | 0.00 | 1.00E+00 | no |
| Vmn1r231 | 0.00 | 0.00 | 0.00 | 1.00E+00 | no |
| Vmn1r232 | 0.00 | 0.00 | 0.00 | 1.00E+00 | no |
| Vmn1r234 | 0.00 | 0.00 | 0.00 | 1.00E+00 | no |
| Vmn1r235 | 0.00 | 0.00 | 0.00 | 1.00E+00 | no |
| Vmn1r236 | 0.00 | 0.00 | 0.00 | 1.00E+00 | no |
| Vmn1r237 | 0.00 | 0.00 | 0.00 | 1.00E+00 | no |
| Vmn1r238 | 0.00 | 0.00 | 0.00 | 1.00E+00 | no |
| Vmn1r24  | 0.00 | 0.00 | 0.00 | 1.00E+00 | no |
| Vmn1r25  | 0.00 | 0.00 | 0.00 | 1.00E+00 | no |
| Vmn1r26  | 0.00 | 0.00 | 0.00 | 1.00E+00 | no |
| Vmn1r27  | 0.00 | 0.00 | 0.00 | 1.00E+00 | no |
| Vmn1r28  | 0.00 | 0.00 | 0.00 | 1.00E+00 | no |
| Vmn1r29  | 0.00 | 0.00 | 0.00 | 1.00E+00 | no |
| Vmn1r3   | 0.00 | 0.00 | 0.00 | 1.00E+00 | no |
| Vmn1r30  | 0.00 | 0.00 | 0.00 | 1.00E+00 | no |
| Vmn1r31  | 0.00 | 0.00 | 0.00 | 1.00E+00 | no |
| Vmn1r33  | 0.00 | 0.00 | 0.00 | 1.00E+00 | no |
| Vmn1r34  | 0.00 | 0.00 | 0.00 | 1.00E+00 | no |
| Vmn1r35  | 0.00 | 0.00 | 0.00 | 1.00E+00 | no |
| Vmn1r36  | 0.00 | 0.00 | 0.00 | 1.00E+00 | no |
| Vmn1r37  | 0.00 | 0.00 | 0.00 | 1.00E+00 | no |



|         |      |      |      |          |    |
|---------|------|------|------|----------|----|
| Vmn1r38 | 0.00 | 0.00 | 0.00 | 1.00E+00 | no |
| Vmn1r39 | 0.00 | 0.00 | 0.00 | 1.00E+00 | no |
| Vmn1r4  | 0.00 | 0.00 | 0.00 | 1.00E+00 | no |
| Vmn1r40 | 0.00 | 0.00 | 0.00 | 1.00E+00 | no |
| Vmn1r41 | 0.00 | 0.00 | 0.00 | 1.00E+00 | no |
| Vmn1r43 | 0.00 | 0.00 | 0.00 | 1.00E+00 | no |
| Vmn1r44 | 0.00 | 0.00 | 0.00 | 1.00E+00 | no |
| Vmn1r45 | 0.00 | 0.00 | 0.00 | 1.00E+00 | no |
| Vmn1r46 | 0.00 | 0.00 | 0.00 | 1.00E+00 | no |
| Vmn1r47 | 0.00 | 0.00 | 0.00 | 1.00E+00 | no |
| Vmn1r48 | 0.00 | 0.00 | 0.00 | 1.00E+00 | no |
| Vmn1r49 | 0.00 | 0.00 | 0.00 | 1.00E+00 | no |
| Vmn1r5  | 0.00 | 0.00 | 0.00 | 1.00E+00 | no |
| Vmn1r50 | 0.00 | 0.00 | 0.00 | 1.00E+00 | no |
| Vmn1r51 | 0.00 | 0.00 | 0.00 | 1.00E+00 | no |
| Vmn1r52 | 0.00 | 0.00 | 0.00 | 1.00E+00 | no |
| Vmn1r53 | 0.00 | 0.00 | 0.00 | 1.00E+00 | no |
| Vmn1r54 | 0.00 | 0.00 | 0.00 | 1.00E+00 | no |
| Vmn1r55 | 0.00 | 0.00 | 0.00 | 1.00E+00 | no |
| Vmn1r56 | 0.00 | 0.00 | 0.00 | 1.00E+00 | no |
| Vmn1r57 | 0.00 | 0.00 | 0.00 | 1.00E+00 | no |
| Vmn1r58 | 0.00 | 0.00 | 0.00 | 1.00E+00 | no |
| Vmn1r59 | 0.00 | 0.00 | 0.00 | 1.00E+00 | no |
| Vmn1r6  | 0.00 | 0.00 | 0.00 | 1.00E+00 | no |
| Vmn1r60 | 0.00 | 0.00 | 0.00 | 1.00E+00 | no |
| Vmn1r61 | 0.00 | 0.00 | 0.00 | 1.00E+00 | no |
| Vmn1r62 | 0.00 | 0.00 | 0.00 | 1.00E+00 | no |
| Vmn1r63 | 0.00 | 0.00 | 0.00 | 1.00E+00 | no |
| Vmn1r64 | 0.00 | 0.00 | 0.00 | 1.00E+00 | no |
| Vmn1r65 | 0.00 | 0.00 | 0.00 | 1.00E+00 | no |
| Vmn1r66 | 0.00 | 0.00 | 0.00 | 1.00E+00 | no |
| Vmn1r67 | 0.00 | 0.00 | 0.00 | 1.00E+00 | no |
| Vmn1r68 | 0.00 | 0.00 | 0.00 | 1.00E+00 | no |
| Vmn1r69 | 0.00 | 0.00 | 0.00 | 1.00E+00 | no |
| Vmn1r7  | 0.00 | 0.00 | 0.00 | 1.00E+00 | no |
| Vmn1r70 | 0.00 | 0.00 | 0.00 | 1.00E+00 | no |
| Vmn1r71 | 0.00 | 0.00 | 0.00 | 1.00E+00 | no |
| Vmn1r72 | 0.00 | 0.00 | 0.00 | 1.00E+00 | no |
| Vmn1r73 | 0.00 | 0.00 | 0.00 | 1.00E+00 | no |
| Vmn1r74 | 0.00 | 0.00 | 0.00 | 1.00E+00 | no |
| Vmn1r75 | 0.00 | 0.00 | 0.00 | 1.00E+00 | no |
| Vmn1r76 | 0.00 | 0.00 | 0.00 | 1.00E+00 | no |

|             |      |      |      |          |    |
|-------------|------|------|------|----------|----|
| Vmn1r77     | 0.00 | 0.00 | 0.00 | 1.00E+00 | no |
| Vmn1r78     | 0.00 | 0.00 | 0.00 | 1.00E+00 | no |
| Vmn1r8      | 0.00 | 0.00 | 0.00 | 1.00E+00 | no |
| Vmn1r80     | 0.00 | 0.00 | 0.00 | 1.00E+00 | no |
| Vmn1r81     | 0.00 | 0.00 | 0.00 | 1.00E+00 | no |
| Vmn1r82     | 0.00 | 0.00 | 0.00 | 1.00E+00 | no |
| Vmn1r83     | 0.00 | 0.00 | 0.00 | 1.00E+00 | no |
| Vmn1r84     | 0.00 | 0.00 | 0.00 | 1.00E+00 | no |
| Vmn1r85     | 0.00 | 0.00 | 0.00 | 1.00E+00 | no |
| Vmn1r86     | 0.00 | 0.00 | 0.00 | 1.00E+00 | no |
| Vmn1r87     | 0.00 | 0.00 | 0.00 | 1.00E+00 | no |
| Vmn1r88     | 0.00 | 0.00 | 0.00 | 1.00E+00 | no |
| Vmn1r89     | 0.00 | 0.00 | 0.00 | 1.00E+00 | no |
| Vmn1r9      | 0.00 | 0.00 | 0.00 | 1.00E+00 | no |
| Vmn1r91     | 0.00 | 0.00 | 0.00 | 1.00E+00 | no |
| Vmn1r93     | 0.00 | 0.00 | 0.00 | 1.00E+00 | no |
| Vmn1r94     | 0.00 | 0.00 | 0.00 | 1.00E+00 | no |
| Vmn1r95     | 0.00 | 0.00 | 0.00 | 1.00E+00 | no |
| Vmn2r-ps11  | 0.00 | 0.00 | 0.00 | 1.00E+00 | no |
| Vmn2r-ps129 | 0.00 | 0.00 | 0.00 | 1.00E+00 | no |
| Vmn2r-ps60  | 0.00 | 0.00 | 0.00 | 1.00E+00 | no |
| Vmn2r10     | 0.00 | 0.00 | 0.00 | 1.00E+00 | no |
| Vmn2r100    | 0.00 | 0.00 | 0.00 | 1.00E+00 | no |
| Vmn2r101    | 0.00 | 0.00 | 0.00 | 1.00E+00 | no |
| Vmn2r102    | 0.00 | 0.00 | 0.00 | 1.00E+00 | no |
| Vmn2r103    | 0.00 | 0.00 | 0.00 | 1.00E+00 | no |
| Vmn2r104    | 0.00 | 0.00 | 0.00 | 1.00E+00 | no |
| Vmn2r106    | 0.00 | 0.00 | 0.00 | 1.00E+00 | no |
| Vmn2r107    | 0.00 | 0.00 | 0.00 | 1.00E+00 | no |
| Vmn2r108    | 0.00 | 0.00 | 0.00 | 1.00E+00 | no |
| Vmn2r109    | 0.00 | 0.00 | 0.00 | 1.00E+00 | no |
| Vmn2r11     | 0.00 | 0.00 | 0.00 | 1.00E+00 | no |
| Vmn2r110    | 0.00 | 0.00 | 0.00 | 1.00E+00 | no |
| Vmn2r111    | 0.00 | 0.00 | 0.00 | 1.00E+00 | no |
| Vmn2r112    | 0.00 | 0.00 | 0.00 | 1.00E+00 | no |
| Vmn2r113    | 0.00 | 0.00 | 0.00 | 1.00E+00 | no |
| Vmn2r114    | 0.00 | 0.00 | 0.00 | 1.00E+00 | no |
| Vmn2r115    | 0.00 | 0.00 | 0.00 | 1.00E+00 | no |
| Vmn2r116    | 0.00 | 0.00 | 0.00 | 1.00E+00 | no |
| Vmn2r117    | 0.00 | 0.00 | 0.00 | 1.00E+00 | no |
| Vmn2r118    | 0.00 | 0.00 | 0.00 | 1.00E+00 | no |
| Vmn2r12     | 0.00 | 0.00 | 0.00 | 1.00E+00 | no |

|          |      |      |      |          |    |
|----------|------|------|------|----------|----|
| Vmn2r120 | 0.00 | 0.00 | 0.00 | 1.00E+00 | no |
| Vmn2r121 | 0.00 | 0.00 | 0.00 | 1.00E+00 | no |
| Vmn2r123 | 0.00 | 0.00 | 0.00 | 1.00E+00 | no |
| Vmn2r13  | 0.00 | 0.00 | 0.00 | 1.00E+00 | no |
| Vmn2r14  | 0.00 | 0.00 | 0.00 | 1.00E+00 | no |
| Vmn2r16  | 0.00 | 0.00 | 0.00 | 1.00E+00 | no |
| Vmn2r17  | 0.00 | 0.00 | 0.00 | 1.00E+00 | no |
| Vmn2r19  | 0.00 | 0.00 | 0.00 | 1.00E+00 | no |
| Vmn2r20  | 0.00 | 0.00 | 0.00 | 1.00E+00 | no |
| Vmn2r21  | 0.00 | 0.00 | 0.00 | 1.00E+00 | no |
| Vmn2r22  | 0.00 | 0.00 | 0.00 | 1.00E+00 | no |
| Vmn2r23  | 0.00 | 0.00 | 0.00 | 1.00E+00 | no |
| Vmn2r24  | 0.00 | 0.00 | 0.00 | 1.00E+00 | no |
| Vmn2r25  | 0.00 | 0.00 | 0.00 | 1.00E+00 | no |
| Vmn2r28  | 0.00 | 0.00 | 0.00 | 1.00E+00 | no |
| Vmn2r3   | 0.00 | 0.00 | 0.00 | 1.00E+00 | no |
| Vmn2r30  | 0.00 | 0.00 | 0.00 | 1.00E+00 | no |
| Vmn2r31  | 0.00 | 0.00 | 0.00 | 1.00E+00 | no |
| Vmn2r32  | 0.00 | 0.00 | 0.00 | 1.00E+00 | no |
| Vmn2r33  | 0.00 | 0.00 | 0.00 | 1.00E+00 | no |
| Vmn2r34  | 0.00 | 0.00 | 0.00 | 1.00E+00 | no |
| Vmn2r35  | 0.00 | 0.00 | 0.00 | 1.00E+00 | no |
| Vmn2r36  | 0.00 | 0.00 | 0.00 | 1.00E+00 | no |
| Vmn2r37  | 0.00 | 0.00 | 0.00 | 1.00E+00 | no |
| Vmn2r38  | 0.00 | 0.00 | 0.00 | 1.00E+00 | no |
| Vmn2r39  | 0.00 | 0.00 | 0.00 | 1.00E+00 | no |
| Vmn2r4   | 0.00 | 0.00 | 0.00 | 1.00E+00 | no |
| Vmn2r40  | 0.00 | 0.00 | 0.00 | 1.00E+00 | no |
| Vmn2r41  | 0.00 | 0.00 | 0.00 | 1.00E+00 | no |
| Vmn2r42  | 0.00 | 0.00 | 0.00 | 1.00E+00 | no |
| Vmn2r43  | 0.00 | 0.00 | 0.00 | 1.00E+00 | no |
| Vmn2r44  | 0.00 | 0.00 | 0.00 | 1.00E+00 | no |
| Vmn2r45  | 0.00 | 0.00 | 0.00 | 1.00E+00 | no |
| Vmn2r46  | 0.00 | 0.00 | 0.00 | 1.00E+00 | no |
| Vmn2r47  | 0.00 | 0.00 | 0.00 | 1.00E+00 | no |
| Vmn2r48  | 0.00 | 0.00 | 0.00 | 1.00E+00 | no |
| Vmn2r49  | 0.00 | 0.00 | 0.00 | 1.00E+00 | no |
| Vmn2r5   | 0.00 | 0.00 | 0.00 | 1.00E+00 | no |
| Vmn2r50  | 0.00 | 0.00 | 0.00 | 1.00E+00 | no |
| Vmn2r51  | 0.00 | 0.00 | 0.00 | 1.00E+00 | no |
| Vmn2r52  | 0.00 | 0.00 | 0.00 | 1.00E+00 | no |
| Vmn2r53  | 0.00 | 0.00 | 0.00 | 1.00E+00 | no |

|            |      |      |      |          |    |
|------------|------|------|------|----------|----|
| Vmn2r54    | 0.00 | 0.00 | 0.00 | 1.00E+00 | no |
| Vmn2r55    | 0.00 | 0.00 | 0.00 | 1.00E+00 | no |
| Vmn2r56    | 0.00 | 0.00 | 0.00 | 1.00E+00 | no |
| Vmn2r58    | 0.00 | 0.00 | 0.00 | 1.00E+00 | no |
| Vmn2r59    | 0.00 | 0.00 | 0.00 | 1.00E+00 | no |
| Vmn2r6     | 0.00 | 0.00 | 0.00 | 1.00E+00 | no |
| Vmn2r60    | 0.00 | 0.00 | 0.00 | 1.00E+00 | no |
| Vmn2r61    | 0.00 | 0.00 | 0.00 | 1.00E+00 | no |
| Vmn2r62    | 0.00 | 0.00 | 0.00 | 1.00E+00 | no |
| Vmn2r63    | 0.00 | 0.00 | 0.00 | 1.00E+00 | no |
| Vmn2r66    | 0.00 | 0.00 | 0.00 | 1.00E+00 | no |
| Vmn2r67    | 0.00 | 0.00 | 0.00 | 1.00E+00 | no |
| Vmn2r68-ps | 0.00 | 0.00 | 0.00 | 1.00E+00 | no |
| Vmn2r69    | 0.00 | 0.00 | 0.00 | 1.00E+00 | no |
| Vmn2r7     | 0.00 | 0.00 | 0.00 | 1.00E+00 | no |
| Vmn2r70    | 0.00 | 0.00 | 0.00 | 1.00E+00 | no |
| Vmn2r71    | 0.00 | 0.00 | 0.00 | 1.00E+00 | no |
| Vmn2r72-ps | 0.00 | 0.00 | 0.00 | 1.00E+00 | no |
| Vmn2r73    | 0.00 | 0.00 | 0.00 | 1.00E+00 | no |
| Vmn2r74    | 0.00 | 0.00 | 0.00 | 1.00E+00 | no |
| Vmn2r75    | 0.00 | 0.00 | 0.00 | 1.00E+00 | no |
| Vmn2r76    | 0.00 | 0.00 | 0.00 | 1.00E+00 | no |
| Vmn2r77    | 0.00 | 0.00 | 0.00 | 1.00E+00 | no |
| Vmn2r78    | 0.00 | 0.00 | 0.00 | 1.00E+00 | no |
| Vmn2r79    | 0.00 | 0.00 | 0.00 | 1.00E+00 | no |
| Vmn2r8     | 0.00 | 0.00 | 0.00 | 1.00E+00 | no |
| Vmn2r80    | 0.00 | 0.00 | 0.00 | 1.00E+00 | no |
| Vmn2r81    | 0.00 | 0.00 | 0.00 | 1.00E+00 | no |
| Vmn2r82    | 0.00 | 0.00 | 0.00 | 1.00E+00 | no |
| Vmn2r83    | 0.00 | 0.00 | 0.00 | 1.00E+00 | no |
| Vmn2r88    | 0.00 | 0.00 | 0.00 | 1.00E+00 | no |
| Vmn2r89    | 0.00 | 0.00 | 0.00 | 1.00E+00 | no |
| Vmn2r9     | 0.00 | 0.00 | 0.00 | 1.00E+00 | no |
| Vmn2r90    | 0.00 | 0.00 | 0.00 | 1.00E+00 | no |
| Vmn2r91    | 0.00 | 0.00 | 0.00 | 1.00E+00 | no |
| Vmn2r92    | 0.00 | 0.00 | 0.00 | 1.00E+00 | no |
| Vmn2r93    | 0.00 | 0.00 | 0.00 | 1.00E+00 | no |
| Vmn2r94    | 0.00 | 0.00 | 0.00 | 1.00E+00 | no |
| Vmn2r95    | 0.00 | 0.00 | 0.00 | 1.00E+00 | no |
| Vmn2r98    | 0.00 | 0.00 | 0.00 | 1.00E+00 | no |
| Vmn2r99    | 0.00 | 0.00 | 0.00 | 1.00E+00 | no |
| Vmo1       | 0.00 | 0.00 | 0.00 | 1.00E+00 | no |

|         |      |      |      |          |    |
|---------|------|------|------|----------|----|
| Vrtn    | 0.00 | 0.00 | 0.00 | 1.00E+00 | no |
| Vsig1   | 0.00 | 0.00 | 0.00 | 1.00E+00 | no |
| Vsig4   | 0.00 | 0.00 | 0.00 | 1.00E+00 | no |
| Vsig8   | 0.00 | 0.00 | 0.00 | 1.00E+00 | no |
| Vstm2a  | 0.00 | 0.00 | 0.00 | 1.00E+00 | no |
| Vstm2b  | 0.00 | 0.00 | 0.00 | 1.00E+00 | no |
| Vsx2    | 0.00 | 0.00 | 0.00 | 1.00E+00 | no |
| Vtcn1   | 0.00 | 0.00 | 0.00 | 1.00E+00 | no |
| Vtn     | 0.00 | 0.00 | 0.00 | 1.00E+00 | no |
| Vwa2    | 0.00 | 0.00 | 0.00 | 1.00E+00 | no |
| Vwc2l   | 0.00 | 0.00 | 0.00 | 1.00E+00 | no |
| Vwde    | 0.00 | 0.00 | 0.00 | 1.00E+00 | no |
| Wap     | 0.00 | 0.00 | 0.00 | 1.00E+00 | no |
| Wasf3   | 0.00 | 0.00 | 0.00 | 1.00E+00 | no |
| Wbscr17 | 0.00 | 0.00 | 0.00 | 1.00E+00 | no |
| Wbscr25 | 0.00 | 0.00 | 0.00 | 1.00E+00 | no |
| Wbscr28 | 0.00 | 0.00 | 0.00 | 1.00E+00 | no |
| Wdr16   | 0.00 | 0.00 | 0.00 | 1.00E+00 | no |
| Wdr17   | 0.00 | 0.00 | 0.00 | 1.00E+00 | no |
| Wdr38   | 0.00 | 0.00 | 0.00 | 1.00E+00 | no |
| Wdr52   | 0.00 | 0.00 | 0.00 | 1.00E+00 | no |
| Wdr64   | 0.00 | 0.00 | 0.00 | 1.00E+00 | no |
| Wdr69   | 0.00 | 0.00 | 0.00 | 1.00E+00 | no |
| Wdr72   | 0.00 | 0.00 | 0.00 | 1.00E+00 | no |
| Wfdc1   | 0.00 | 0.00 | 0.00 | 1.00E+00 | no |
| Wfdc11  | 0.00 | 0.00 | 0.00 | 1.00E+00 | no |
| Wfdc12  | 0.00 | 0.00 | 0.00 | 1.00E+00 | no |
| Wfdc13  | 0.00 | 0.00 | 0.00 | 1.00E+00 | no |
| Wfdc15a | 0.00 | 0.00 | 0.00 | 1.00E+00 | no |
| Wfdc15b | 0.00 | 0.00 | 0.00 | 1.00E+00 | no |
| Wfdc16  | 0.00 | 0.00 | 0.00 | 1.00E+00 | no |
| Wfdc2   | 0.00 | 0.00 | 0.00 | 1.00E+00 | no |
| Wfdc3   | 0.00 | 0.00 | 0.00 | 1.00E+00 | no |
| Wfdc5   | 0.00 | 0.00 | 0.00 | 1.00E+00 | no |
| Wfdc6a  | 0.00 | 0.00 | 0.00 | 1.00E+00 | no |
| Wfdc6b  | 0.00 | 0.00 | 0.00 | 1.00E+00 | no |
| Wfdc8   | 0.00 | 0.00 | 0.00 | 1.00E+00 | no |
| Wipf3   | 0.00 | 0.00 | 0.00 | 1.00E+00 | no |
| Wisp1   | 0.00 | 0.00 | 0.00 | 1.00E+00 | no |
| Wnt1    | 0.00 | 0.00 | 0.00 | 1.00E+00 | no |
| Wnt11   | 0.00 | 0.00 | 0.00 | 1.00E+00 | no |
| Wnt2    | 0.00 | 0.00 | 0.00 | 1.00E+00 | no |

|         |        |       |      |          |    |
|---------|--------|-------|------|----------|----|
| Wnt3    | 0.00   | 0.00  | 0.00 | 1.00E+00 | no |
| Wnt3a   | 0.00   | 0.00  | 0.00 | 1.00E+00 | no |
| Wnt4    | 0.00   | 0.00  | 0.00 | 1.00E+00 | no |
| Wnt5a   | 0.00   | 0.00  | 0.00 | 1.00E+00 | no |
| Wnt7a   | 0.00   | 0.00  | 0.00 | 1.00E+00 | no |
| Wnt7b   | 0.00   | 0.00  | 0.00 | 1.00E+00 | no |
| Wnt8a   | 0.00   | 0.00  | 0.00 | 1.00E+00 | no |
| Wnt9b   | 0.00   | 0.00  | 0.00 | 1.00E+00 | no |
| Wscd2   | 0.00   | 0.00  | 0.00 | 1.00E+00 | no |
| Wt1     | 0.00   | 0.00  | 0.00 | 1.00E+00 | no |
| Wwtr1   | 0.00   | 0.00  | 0.00 | 1.00E+00 | no |
| Xirp2   | 0.00   | 0.00  | 0.00 | 1.00E+00 | no |
| Xkr4    | 0.00   | 0.00  | 0.00 | 1.00E+00 | no |
| Xkr9    | 0.00   | 0.00  | 0.00 | 1.00E+00 | no |
| Xlr5a   | 0.00   | 0.00  | 0.00 | 1.00E+00 | no |
| Xlr5b   | 0.00   | 0.00  | 0.00 | 1.00E+00 | no |
| Xlr5c   | 0.00   | 0.00  | 0.00 | 1.00E+00 | no |
| Zar1    | 0.00   | 0.00  | 0.00 | 1.00E+00 | no |
| Zar1l   | 0.00   | 0.00  | 0.00 | 1.00E+00 | no |
| Zbbx    | 0.00   | 0.00  | 0.00 | 1.00E+00 | no |
| Zbtb8b  | 0.00   | 0.00  | 0.00 | 1.00E+00 | no |
| Zcchc13 | 0.00   | 0.00  | 0.00 | 1.00E+00 | no |
| Zcchc16 | 0.00   | 0.00  | 0.00 | 1.00E+00 | no |
| Zcchc5  | 0.00   | 0.00  | 0.00 | 1.00E+00 | no |
| Zdhhc11 | 0.00   | 0.00  | 0.00 | 1.00E+00 | no |
| Zdhhc19 | 0.00   | 0.00  | 0.00 | 1.00E+00 | no |
| Zf12    | 0.00   | 0.00  | 0.00 | 1.00E+00 | no |
| Zfhx2as | 0.00   | 0.00  | 0.00 | 1.00E+00 | no |
| Zfhx4   | 0.00   | 0.00  | 0.00 | 1.00E+00 | no |
| Zfp13   | 0.00   | 0.00  | 0.00 | 1.00E+00 | no |
| Zfp131  | 0.00   | 0.00  | 0.00 | 1.00E+00 | no |
| Zfp185  | 0.00   | 0.00  | 0.00 | 1.00E+00 | no |
| Zfp207  | 103.47 | 81.95 | 0.00 | 1.00E+00 | no |
| Zfp219  | 0.00   | 0.00  | 0.00 | 1.00E+00 | no |
| Zfp27   | 4.27   | 4.83  | 0.00 | 1.00E+00 | no |
| Zfp281  | 12.33  | 10.57 | 0.00 | 1.00E+00 | no |
| Zfp334  | 0.00   | 0.00  | 0.00 | 1.00E+00 | no |
| Zfp352  | 0.00   | 0.00  | 0.00 | 1.00E+00 | no |
| Zfp353  | 0.00   | 0.00  | 0.00 | 1.00E+00 | no |
| Zfp37   | 0.00   | 0.00  | 0.00 | 1.00E+00 | no |
| Zfp385b | 0.00   | 0.00  | 0.00 | 1.00E+00 | no |
| Zfp42   | 0.00   | 0.00  | 0.00 | 1.00E+00 | no |

|         |       |       |      |          |    |
|---------|-------|-------|------|----------|----|
| Zfp474  | 0.00  | 0.00  | 0.00 | 1.00E+00 | no |
| Zfp488  | 0.00  | 0.00  | 0.00 | 1.00E+00 | no |
| Zfp503  | 0.00  | 0.00  | 0.00 | 1.00E+00 | no |
| Zfp568  | 8.89  | 5.01  | 0.00 | 1.00E+00 | no |
| Zfp600  | 0.00  | 0.00  | 0.00 | 1.00E+00 | no |
| Zfp616  | 0.00  | 0.00  | 0.00 | 1.00E+00 | no |
| Zfp641  | 0.00  | 0.00  | 0.00 | 1.00E+00 | no |
| Zfp663  | 0.00  | 0.00  | 0.00 | 1.00E+00 | no |
| Zfp68   | 16.75 | 15.42 | 0.00 | 1.00E+00 | no |
| Zfp735  | 0.00  | 0.00  | 0.00 | 1.00E+00 | no |
| Zfp804a | 0.00  | 0.00  | 0.00 | 1.00E+00 | no |
| Zfp804b | 0.00  | 0.00  | 0.00 | 1.00E+00 | no |
| Zfp872  | 0.00  | 0.00  | 0.00 | 1.00E+00 | no |
| Zfpm2   | 0.00  | 0.00  | 0.00 | 1.00E+00 | no |
| Zfy1    | 0.00  | 0.00  | 0.00 | 1.00E+00 | no |
| Zfy2    | 0.00  | 0.00  | 0.00 | 1.00E+00 | no |
| Zic1    | 0.00  | 0.00  | 0.00 | 1.00E+00 | no |
| Zic2    | 0.00  | 0.00  | 0.00 | 1.00E+00 | no |
| Zic3    | 0.00  | 0.00  | 0.00 | 1.00E+00 | no |
| Zic4    | 0.00  | 0.00  | 0.00 | 1.00E+00 | no |
| Zic5    | 0.00  | 0.00  | 0.00 | 1.00E+00 | no |
| Zim3    | 0.00  | 0.00  | 0.00 | 1.00E+00 | no |
| Znrf4   | 0.00  | 0.00  | 0.00 | 1.00E+00 | no |
| Zp2     | 0.00  | 0.00  | 0.00 | 1.00E+00 | no |
| Zp3     | 0.00  | 0.00  | 0.00 | 1.00E+00 | no |
| Zp3r    | 0.00  | 0.00  | 0.00 | 1.00E+00 | no |
| Zp4-ps  | 0.00  | 0.00  | 0.00 | 1.00E+00 | no |
| Zpld1   | 0.00  | 0.00  | 0.00 | 1.00E+00 | no |
| Zscan10 | 0.00  | 0.00  | 0.00 | 1.00E+00 | no |
| Zscan21 | 14.84 | 15.58 | 0.00 | 1.00E+00 | no |
| Zscan4a | 0.00  | 0.00  | 0.00 | 1.00E+00 | no |
| Zscan4b | 0.00  | 0.00  | 0.00 | 1.00E+00 | no |
| Zscan4c | 0.00  | 0.00  | 0.00 | 1.00E+00 | no |
| Zscan4d | 0.00  | 0.00  | 0.00 | 1.00E+00 | no |
| Zscan4e | 0.00  | 0.00  | 0.00 | 1.00E+00 | no |
| Zscan4f | 0.00  | 0.00  | 0.00 | 1.00E+00 | no |
| Zscan5b | 0.00  | 0.00  | 0.00 | 1.00E+00 | no |
| Zswim2  | 0.00  | 0.00  | 0.00 | 1.00E+00 | no |
| Mtif2   | 11.91 | 11.91 | 0.00 | 1.00E+00 | no |
| Zfp622  | 17.98 | 17.98 | 0.00 | 1.00E+00 | no |
| Eml5    | 1.60  | 1.60  | 0.00 | 1.00E+00 | no |
| lpo13   | 14.59 | 14.59 | 0.00 | 1.00E+00 | no |

|               |        |        |      |          |    |
|---------------|--------|--------|------|----------|----|
| Slc24a6       | 4.31   | 4.31   | 0.00 | 1.00E+00 | no |
| Myo1c         | 61.21  | 61.19  | 0.00 | 1.00E+00 | no |
| Pcdhgc5       | 0.48   | 0.48   | 0.00 | 1.00E+00 | no |
| Chmp7         | 18.86  | 18.85  | 0.00 | 1.00E+00 | no |
| Mut           | 10.38  | 10.37  | 0.00 | 1.00E+00 | no |
| Naca          | 232.51 | 232.41 | 0.00 | 1.00E+00 | no |
| Zfp458        | 1.13   | 1.12   | 0.00 | 1.00E+00 | no |
| Zbtb26        | 7.96   | 7.95   | 0.00 | 1.00E+00 | no |
| Rab7l1        | 10.50  | 10.49  | 0.00 | 1.00E+00 | no |
| Spryd4        | 8.18   | 8.18   | 0.00 | 1.00E+00 | no |
| Atf7ip        | 33.61  | 33.59  | 0.00 | 1.00E+00 | no |
| Lonp1         | 30.33  | 30.30  | 0.00 | 1.00E+00 | no |
| Ttll3         | 6.62   | 6.61   | 0.00 | 1.00E+00 | no |
| A230046K03Ri  | 23.02  | 23.01  | 0.00 | 1.00E+00 | no |
| Nab2          | 2.66   | 2.66   | 0.00 | 1.00E+00 | no |
| Mnat1         | 8.31   | 8.30   | 0.00 | 1.00E+00 | no |
| 0610007P22Ri  | 13.75  | 13.74  | 0.00 | 1.00E+00 | no |
| Sc5d          | 12.11  | 12.10  | 0.00 | 1.00E+00 | no |
| Kdm2a         | 28.83  | 28.79  | 0.00 | 1.00E+00 | no |
| 2610524H06Ri  | 5.73   | 5.72   | 0.00 | 1.00E+00 | no |
| Krt2          | 0.03   | 0.03   | 0.00 | 1.00E+00 | no |
| Trak2         | 18.28  | 18.25  | 0.00 | 1.00E+00 | no |
| Stx5a         | 34.83  | 34.77  | 0.00 | 1.00E+00 | no |
| Ccm2          | 54.64  | 54.54  | 0.00 | 1.00E+00 | no |
| Mmp17         | 0.53   | 0.53   | 0.00 | 1.00E+00 | no |
| Rab18         | 27.50  | 27.45  | 0.00 | 1.00E+00 | no |
| Bpnt1         | 5.30   | 5.29   | 0.00 | 1.00E+00 | no |
| Arhgef1       | 86.78  | 86.60  | 0.00 | 1.00E+00 | no |
| 2410131K14Ri  | 4.10   | 4.09   | 0.00 | 1.00E+00 | no |
| 2310004I24Rik | 10.04  | 10.02  | 0.00 | 1.00E+00 | no |
| Lysmd3        | 8.19   | 8.17   | 0.00 | 1.00E+00 | no |
| Tubgcp5       | 10.09  | 10.06  | 0.00 | 1.00E+00 | no |
| Adipor2       | 31.39  | 31.32  | 0.00 | 1.00E+00 | no |
| 2310044H10Ri  | 33.41  | 33.34  | 0.00 | 1.00E+00 | no |
| Ubr1          | 15.05  | 15.01  | 0.00 | 1.00E+00 | no |
| Scnm1         | 21.17  | 21.12  | 0.00 | 1.00E+00 | no |
| 1700081L11Ril | 30.29  | 30.22  | 0.00 | 1.00E+00 | no |
| Synj2         | 3.08   | 3.07   | 0.00 | 1.00E+00 | no |
| Atp13a1       | 25.82  | 25.76  | 0.00 | 1.00E+00 | no |
| Nek9          | 27.12  | 27.05  | 0.00 | 1.00E+00 | no |
| Pggt1b        | 14.61  | 14.58  | 0.00 | 1.00E+00 | no |
| Aldh3a2       | 15.95  | 15.91  | 0.00 | 1.00E+00 | no |



|               |       |       |       |          |    |
|---------------|-------|-------|-------|----------|----|
| Scyl2         | 16.93 | 16.89 | 0.00  | 1.00E+00 | no |
| Sh3tc2        | 0.03  | 0.03  | 0.00  | 1.00E+00 | no |
| Ppp1r14b      | 79.36 | 79.13 | 0.00  | 1.00E+00 | no |
| Telo2         | 10.64 | 10.61 | 0.00  | 1.00E+00 | no |
| Rnpc3         | 13.21 | 13.17 | 0.00  | 1.00E+00 | no |
| Mfsd5         | 16.47 | 16.42 | 0.00  | 1.00E+00 | no |
| Rbm45         | 20.40 | 20.34 | 0.00  | 1.00E+00 | no |
| 2410015M20R   | 22.92 | 22.85 | 0.00  | 1.00E+00 | no |
| Osbp          | 23.32 | 23.24 | 0.00  | 1.00E+00 | no |
| Ttc30a1       | 2.96  | 2.96  | 0.00  | 1.00E+00 | no |
| Unc50         | 16.87 | 16.81 | 0.00  | 1.00E+00 | no |
| Zfp324        | 4.62  | 4.61  | 0.00  | 1.00E+00 | no |
| Mff           | 28.06 | 27.97 | 0.00  | 1.00E+00 | no |
| Gpr125        | 0.58  | 0.58  | 0.00  | 1.00E+00 | no |
| Cbx2          | 20.77 | 20.70 | 0.00  | 1.00E+00 | no |
| Zdbf2         | 0.01  | 0.01  | -0.01 | 1.00E+00 | no |
| Gm128         | 0.05  | 0.05  | -0.01 | 1.00E+00 | no |
| 2310011J03Ril | 16.96 | 16.90 | -0.01 | 1.00E+00 | no |
| Supt3h        | 6.36  | 6.34  | -0.01 | 1.00E+00 | no |
| Dnajc1        | 10.95 | 10.91 | -0.01 | 1.00E+00 | no |
| Gosr1         | 15.62 | 15.56 | -0.01 | 1.00E+00 | no |
| Ubl5          | 38.25 | 38.10 | -0.01 | 1.00E+00 | no |
| Boc           | 0.02  | 0.02  | -0.01 | 1.00E+00 | no |
| Nol8          | 13.45 | 13.40 | -0.01 | 1.00E+00 | no |
| Tmem59        | 35.31 | 35.16 | -0.01 | 1.00E+00 | no |
| Nisch         | 41.16 | 40.99 | -0.01 | 1.00E+00 | no |
| Pppde1        | 14.19 | 14.14 | -0.01 | 1.00E+00 | no |
| Nus1          | 18.45 | 18.38 | -0.01 | 1.00E+00 | no |
| Mrpl43        | 28.57 | 28.45 | -0.01 | 1.00E+00 | no |
| Cpeb2         | 0.69  | 0.69  | -0.01 | 1.00E+00 | no |
| Sirt7         | 26.90 | 26.79 | -0.01 | 1.00E+00 | no |
| Rit1          | 5.92  | 5.90  | -0.01 | 1.00E+00 | no |
| Arhgap21      | 14.75 | 14.69 | -0.01 | 1.00E+00 | no |
| Gde1          | 16.22 | 16.15 | -0.01 | 1.00E+00 | no |
| Zfp954        | 8.35  | 8.32  | -0.01 | 1.00E+00 | no |
| AA388235      | 1.89  | 1.88  | -0.01 | 1.00E+00 | no |
| Pea15a        | 3.35  | 3.34  | -0.01 | 1.00E+00 | no |
| Txnl4b        | 6.64  | 6.62  | -0.01 | 1.00E+00 | no |
| Exoc1         | 16.64 | 16.56 | -0.01 | 1.00E+00 | no |
| Cdkn1b        | 40.68 | 40.50 | -0.01 | 1.00E+00 | no |
| Naif1         | 2.30  | 2.29  | -0.01 | 1.00E+00 | no |
| Lrp10         | 51.29 | 51.05 | -0.01 | 1.00E+00 | no |

|              |        |        |       |          |    |
|--------------|--------|--------|-------|----------|----|
| Zfp760       | 9.33   | 9.29   | -0.01 | 1.00E+00 | no |
| Upf2         | 16.80  | 16.72  | -0.01 | 1.00E+00 | no |
| AU015228     | 0.45   | 0.45   | -0.01 | 1.00E+00 | no |
| Sh3bp5       | 36.25  | 36.07  | -0.01 | 1.00E+00 | no |
| Tgs1         | 20.00  | 19.90  | -0.01 | 1.00E+00 | no |
| D1Pas1       | 1.44   | 1.43   | -0.01 | 1.00E+00 | no |
| Parvg        | 47.88  | 47.64  | -0.01 | 1.00E+00 | no |
| Gpbp1        | 42.58  | 42.36  | -0.01 | 1.00E+00 | no |
| Adprhl2      | 18.31  | 18.22  | -0.01 | 1.00E+00 | no |
| Iqcc         | 6.38   | 6.34   | -0.01 | 1.00E+00 | no |
| Phc2         | 36.59  | 36.41  | -0.01 | 1.00E+00 | no |
| Pcsk4        | 1.93   | 1.92   | -0.01 | 1.00E+00 | no |
| Sec31a       | 28.50  | 28.36  | -0.01 | 1.00E+00 | no |
| Fbxo28       | 7.66   | 7.62   | -0.01 | 1.00E+00 | no |
| Det1         | 9.96   | 9.91   | -0.01 | 1.00E+00 | no |
| Zfp940       | 3.24   | 3.22   | -0.01 | 1.00E+00 | no |
| Sgta         | 29.75  | 29.59  | -0.01 | 1.00E+00 | no |
| Meis3        | 0.16   | 0.16   | -0.01 | 1.00E+00 | no |
| Asna1        | 29.63  | 29.47  | -0.01 | 1.00E+00 | no |
| C1rb         | 0.19   | 0.18   | -0.01 | 1.00E+00 | no |
| Ftsjd2       | 24.75  | 24.62  | -0.01 | 1.00E+00 | no |
| 1700030K09Ri | 8.95   | 8.90   | -0.01 | 1.00E+00 | no |
| 5330426P16Ri | 4.11   | 4.08   | -0.01 | 1.00E+00 | no |
| Ilvbl        | 22.31  | 22.18  | -0.01 | 1.00E+00 | no |
| Drap1        | 39.17  | 38.96  | -0.01 | 1.00E+00 | no |
| B9d2         | 29.57  | 29.40  | -0.01 | 1.00E+00 | no |
| Sgsm2        | 1.63   | 1.62   | -0.01 | 1.00E+00 | no |
| Appbp2       | 19.78  | 19.67  | -0.01 | 1.00E+00 | no |
| Morc2a       | 19.67  | 19.56  | -0.01 | 1.00E+00 | no |
| Tle2         | 0.28   | 0.27   | -0.01 | 1.00E+00 | no |
| Dennd5a      | 19.77  | 19.65  | -0.01 | 1.00E+00 | no |
| Cdc26        | 41.05  | 40.80  | -0.01 | 1.00E+00 | no |
| 1200011M11R  | 11.48  | 11.40  | -0.01 | 1.00E+00 | no |
| Top3b        | 30.44  | 30.24  | -0.01 | 1.00E+00 | no |
| Dhx33        | 16.18  | 16.08  | -0.01 | 1.00E+00 | no |
| Gulo         | 0.08   | 0.08   | -0.01 | 1.00E+00 | no |
| Laptm5       | 106.49 | 105.80 | -0.01 | 1.00E+00 | no |
| Arhgap30     | 42.85  | 42.57  | -0.01 | 1.00E+00 | no |
| Esco1        | 15.72  | 15.62  | -0.01 | 1.00E+00 | no |
| Kdm1a        | 26.95  | 26.77  | -0.01 | 1.00E+00 | no |
| Limd2        | 51.67  | 51.33  | -0.01 | 1.00E+00 | no |
| Pigc         | 5.30   | 5.27   | -0.01 | 1.00E+00 | no |

|          |       |       |       |          |    |
|----------|-------|-------|-------|----------|----|
| Atp5s    | 6.42  | 6.37  | -0.01 | 1.00E+00 | no |
| Map3k11  | 22.89 | 22.73 | -0.01 | 1.00E+00 | no |
| Sbno2    | 15.78 | 15.67 | -0.01 | 1.00E+00 | no |
| Ccdc84   | 9.35  | 9.29  | -0.01 | 1.00E+00 | no |
| Usp28    | 8.56  | 8.50  | -0.01 | 1.00E+00 | no |
| Atpaf1   | 8.08  | 8.02  | -0.01 | 1.00E+00 | no |
| Ccdc66   | 9.19  | 9.12  | -0.01 | 1.00E+00 | no |
| Ofd1     | 7.50  | 7.44  | -0.01 | 1.00E+00 | no |
| Cib3     | 0.11  | 0.11  | -0.01 | 1.00E+00 | no |
| Mfsd2a   | 0.36  | 0.36  | -0.01 | 1.00E+00 | no |
| Mcat     | 12.65 | 12.55 | -0.01 | 1.00E+00 | no |
| Zfp160   | 13.04 | 12.94 | -0.01 | 1.00E+00 | no |
| Khlh36   | 4.67  | 4.64  | -0.01 | 1.00E+00 | no |
| Trim24   | 14.44 | 14.33 | -0.01 | 1.00E+00 | no |
| Zfp414   | 20.77 | 20.61 | -0.01 | 1.00E+00 | no |
| Prdm11   | 3.57  | 3.54  | -0.01 | 1.00E+00 | no |
| Pi4k2a   | 11.30 | 11.21 | -0.01 | 1.00E+00 | no |
| Ap4s1    | 11.45 | 11.36 | -0.01 | 1.00E+00 | no |
| Ube2q2   | 12.98 | 12.87 | -0.01 | 1.00E+00 | no |
| Suclg2   | 17.21 | 17.06 | -0.01 | 1.00E+00 | no |
| Gm2382   | 8.37  | 8.30  | -0.01 | 1.00E+00 | no |
| Dnd1     | 1.88  | 1.87  | -0.01 | 1.00E+00 | no |
| Rsad2    | 0.64  | 0.63  | -0.01 | 1.00E+00 | no |
| Ufc1     | 28.73 | 28.48 | -0.01 | 1.00E+00 | no |
| Sergef   | 5.26  | 5.21  | -0.01 | 1.00E+00 | no |
| Rnf186   | 0.06  | 0.06  | -0.01 | 1.00E+00 | no |
| Shfm1    | 55.92 | 55.41 | -0.01 | 1.00E+00 | no |
| Tmed4    | 20.12 | 19.93 | -0.01 | 1.00E+00 | no |
| Tmem60   | 14.34 | 14.20 | -0.01 | 1.00E+00 | no |
| R3hdm2   | 27.88 | 27.62 | -0.01 | 1.00E+00 | no |
| Emb      | 5.79  | 5.73  | -0.01 | 1.00E+00 | no |
| Tnfrsf4  | 1.79  | 1.77  | -0.01 | 1.00E+00 | no |
| Pex12    | 6.17  | 6.11  | -0.01 | 1.00E+00 | no |
| Rilpl1   | 0.95  | 0.94  | -0.01 | 1.00E+00 | no |
| Fndc4    | 0.03  | 0.03  | -0.01 | 1.00E+00 | no |
| Osbpl3   | 0.77  | 0.76  | -0.01 | 1.00E+00 | no |
| Suv420h1 | 26.80 | 26.53 | -0.01 | 1.00E+00 | no |
| Tnk1     | 0.27  | 0.27  | -0.01 | 1.00E+00 | no |
| Adat2    | 5.34  | 5.29  | -0.02 | 1.00E+00 | no |
| Pigg     | 4.75  | 4.70  | -0.02 | 1.00E+00 | no |
| Mtg1     | 6.87  | 6.79  | -0.02 | 1.00E+00 | no |
| Zpbp2    | 1.97  | 1.95  | -0.02 | 1.00E+00 | no |

|               |       |       |       |          |    |
|---------------|-------|-------|-------|----------|----|
| Nfx1          | 20.17 | 19.95 | -0.02 | 1.00E+00 | no |
| Timp2         | 0.39  | 0.38  | -0.02 | 1.00E+00 | no |
| Tsix          | 0.05  | 0.05  | -0.02 | 1.00E+00 | no |
| Tcea1         | 77.13 | 76.25 | -0.02 | 1.00E+00 | no |
| Gpm6b         | 1.72  | 1.70  | -0.02 | 1.00E+00 | no |
| Csf1r         | 1.15  | 1.14  | -0.02 | 1.00E+00 | no |
| Med22         | 14.42 | 14.25 | -0.02 | 1.00E+00 | no |
| Tssk6         | 1.77  | 1.75  | -0.02 | 1.00E+00 | no |
| Irf6          | 0.10  | 0.10  | -0.02 | 1.00E+00 | no |
| Smox          | 0.89  | 0.88  | -0.02 | 1.00E+00 | no |
| Slc16a9       | 0.03  | 0.02  | -0.02 | 1.00E+00 | no |
| Specc1l       | 17.26 | 17.01 | -0.02 | 1.00E+00 | no |
| Ptgir         | 0.18  | 0.18  | -0.02 | 1.00E+00 | no |
| Etv1          | 0.23  | 0.22  | -0.02 | 1.00E+00 | no |
| Aste1         | 6.43  | 6.33  | -0.02 | 1.00E+00 | no |
| Lrrc56        | 1.59  | 1.56  | -0.02 | 1.00E+00 | no |
| AI316807      | 8.92  | 8.78  | -0.02 | 1.00E+00 | no |
| Pemt          | 1.59  | 1.56  | -0.02 | 1.00E+00 | no |
| Doc2g         | 1.21  | 1.19  | -0.02 | 1.00E+00 | no |
| Emr1          | 0.41  | 0.41  | -0.02 | 1.00E+00 | no |
| BC018242      | 0.24  | 0.24  | -0.03 | 1.00E+00 | no |
| Ube3a         | 25.83 | 25.36 | -0.03 | 1.00E+00 | no |
| Tex15         | 0.02  | 0.02  | -0.03 | 1.00E+00 | no |
| Lrrfip2       | 6.21  | 6.09  | -0.03 | 1.00E+00 | no |
| 0610038B21Ri  | 0.47  | 0.46  | -0.03 | 1.00E+00 | no |
| Palld         | 0.02  | 0.02  | -0.03 | 1.00E+00 | no |
| Aamp          | 32.49 | 31.85 | -0.03 | 1.00E+00 | no |
| Tnpo2         | 29.08 | 28.50 | -0.03 | 1.00E+00 | no |
| Ddit4l        | 0.03  | 0.03  | -0.03 | 1.00E+00 | no |
| Gabpb1        | 40.86 | 40.02 | -0.03 | 1.00E+00 | no |
| 2810429I04Rik | 0.80  | 0.78  | -0.03 | 1.00E+00 | no |
| Anxa3         | 0.35  | 0.34  | -0.03 | 1.00E+00 | no |
| Mylip         | 33.67 | 32.97 | -0.03 | 1.00E+00 | no |
| Lefty2        | 0.08  | 0.08  | -0.03 | 1.00E+00 | no |
| BC065397      | 1.91  | 1.87  | -0.03 | 1.00E+00 | no |
| Prkcz         | 2.03  | 1.98  | -0.04 | 1.00E+00 | no |
| Dnlz          | 13.00 | 12.67 | -0.04 | 1.00E+00 | no |
| Fam171a2      | 0.02  | 0.02  | -0.04 | 1.00E+00 | no |
| Serpina3j     | 0.02  | 0.02  | -0.04 | 1.00E+00 | no |
| Mpst          | 24.19 | 23.55 | -0.04 | 1.00E+00 | no |
| Ttc4          | 19.29 | 18.77 | -0.04 | 1.00E+00 | no |
| Iqck          | 0.35  | 0.34  | -0.04 | 1.00E+00 | no |

|              |       |       |       |          |    |
|--------------|-------|-------|-------|----------|----|
| Lnx1         | 2.20  | 2.14  | -0.04 | 1.00E+00 | no |
| Rhbdf2       | 13.35 | 12.95 | -0.04 | 1.00E+00 | no |
| Lgtn         | 21.88 | 21.22 | -0.04 | 1.00E+00 | no |
| Oas1f        | 0.09  | 0.09  | -0.04 | 1.00E+00 | no |
| Gm14431      | 0.18  | 0.18  | -0.04 | 1.00E+00 | no |
| Ctsk         | 0.16  | 0.15  | -0.05 | 1.00E+00 | no |
| Sds          | 0.16  | 0.16  | -0.05 | 1.00E+00 | no |
| Gm4984       | 0.36  | 0.34  | -0.05 | 1.00E+00 | no |
| Rabgef1      | 7.41  | 7.18  | -0.05 | 1.00E+00 | no |
| 4933407C03Ri | 32.74 | 31.71 | -0.05 | 1.00E+00 | no |
| Chst7        | 0.07  | 0.07  | -0.05 | 1.00E+00 | no |
| Rmrp         | 0.29  | 0.28  | -0.05 | 1.00E+00 | no |
| Rhbdd1       | 6.98  | 6.76  | -0.05 | 1.00E+00 | no |
| Mtx1         | 17.51 | 16.95 | -0.05 | 1.00E+00 | no |
| Mipol1       | 0.94  | 0.91  | -0.05 | 1.00E+00 | no |
| Vwce         | 0.04  | 0.04  | -0.05 | 1.00E+00 | no |
| Mrvi1        | 1.79  | 1.73  | -0.05 | 1.00E+00 | no |
| Gm5972       | 0.18  | 0.18  | -0.05 | 1.00E+00 | no |
| Cdadcl1      | 13.99 | 13.50 | -0.05 | 1.00E+00 | no |
| Pex7         | 12.72 | 12.27 | -0.05 | 1.00E+00 | no |
| Rbms2        | 10.76 | 10.38 | -0.05 | 1.00E+00 | no |
| Sod3         | 0.03  | 0.03  | -0.05 | 1.00E+00 | no |
| Glrx2        | 6.69  | 6.44  | -0.05 | 1.00E+00 | no |
| Lmna         | 0.68  | 0.65  | -0.05 | 1.00E+00 | no |
| Cdk19        | 39.61 | 38.16 | -0.05 | 1.00E+00 | no |
| Dapk3        | 14.88 | 14.33 | -0.05 | 1.00E+00 | no |
| Ppp2r5b      | 5.56  | 5.35  | -0.05 | 1.00E+00 | no |
| Hist1h4c     | 0.99  | 0.95  | -0.05 | 1.00E+00 | no |
| Rpgr         | 8.24  | 7.93  | -0.06 | 1.00E+00 | no |
| Gipr         | 0.04  | 0.04  | -0.06 | 1.00E+00 | no |
| Dync1i2      | 34.87 | 33.55 | -0.06 | 1.00E+00 | no |
| Bves         | 0.07  | 0.07  | -0.06 | 1.00E+00 | no |
| Stk40        | 16.01 | 15.39 | -0.06 | 1.00E+00 | no |
| Tgfa         | 0.03  | 0.03  | -0.06 | 1.00E+00 | no |
| Dlx1as       | 0.28  | 0.27  | -0.06 | 1.00E+00 | no |
| lqcg         | 0.74  | 0.71  | -0.06 | 1.00E+00 | no |
| Mrps33       | 40.43 | 38.79 | -0.06 | 1.00E+00 | no |
| Zfp84        | 10.78 | 10.34 | -0.06 | 1.00E+00 | no |
| Ccr3         | 0.07  | 0.07  | -0.06 | 1.00E+00 | no |
| Cxcl9        | 0.03  | 0.03  | -0.06 | 1.00E+00 | no |
| Lix1         | 0.03  | 0.03  | -0.06 | 1.00E+00 | no |
| Pank3        | 19.44 | 18.63 | -0.06 | 1.00E+00 | no |

|               |        |        |       |          |    |
|---------------|--------|--------|-------|----------|----|
| Dctn1         | 27.73  | 26.55  | -0.06 | 1.00E+00 | no |
| Pdcd6ip       | 34.45  | 32.99  | -0.06 | 1.00E+00 | no |
| Idh1          | 7.70   | 7.37   | -0.06 | 1.00E+00 | no |
| Cldn20        | 1.10   | 1.05   | -0.06 | 1.00E+00 | no |
| 1700109H08Ri  | 2.81   | 2.68   | -0.06 | 1.00E+00 | no |
| Gnb1l         | 2.54   | 2.43   | -0.06 | 1.00E+00 | no |
| Dnajc19       | 15.70  | 15.01  | -0.06 | 1.00E+00 | no |
| Gpx4          | 59.47  | 56.83  | -0.07 | 1.00E+00 | no |
| Acbd7         | 0.14   | 0.13   | -0.07 | 1.00E+00 | no |
| Dusp26        | 0.04   | 0.04   | -0.07 | 1.00E+00 | no |
| Rab23         | 3.48   | 3.32   | -0.07 | 1.00E+00 | no |
| Add1          | 45.68  | 43.64  | -0.07 | 1.00E+00 | no |
| Usp47         | 20.68  | 19.75  | -0.07 | 1.00E+00 | no |
| 1110057K04Ri  | 20.55  | 19.62  | -0.07 | 1.00E+00 | no |
| Actr5         | 11.91  | 11.36  | -0.07 | 1.00E+00 | no |
| Pla2g4f       | 0.02   | 0.02   | -0.07 | 1.00E+00 | no |
| Itsn2         | 29.33  | 27.92  | -0.07 | 1.00E+00 | no |
| Huwe1         | 44.00  | 41.85  | -0.07 | 1.00E+00 | no |
| Mrpl48        | 25.70  | 24.44  | -0.07 | 1.00E+00 | no |
| A130010J15Ril | 5.07   | 4.82   | -0.07 | 1.00E+00 | no |
| Ppm1m         | 18.11  | 17.22  | -0.07 | 1.00E+00 | no |
| Rnmt          | 12.87  | 12.23  | -0.07 | 1.00E+00 | no |
| BC021614      | 0.11   | 0.10   | -0.07 | 1.00E+00 | no |
| H13           | 33.52  | 31.85  | -0.07 | 1.00E+00 | no |
| Sorbs1        | 3.45   | 3.28   | -0.07 | 1.00E+00 | no |
| Ifi27l2b      | 0.12   | 0.11   | -0.07 | 1.00E+00 | no |
| Rtn1          | 0.05   | 0.05   | -0.07 | 1.00E+00 | no |
| Ppfia1        | 19.68  | 18.64  | -0.08 | 1.00E+00 | no |
| Ugp2          | 15.05  | 14.25  | -0.08 | 1.00E+00 | no |
| Ptrf          | 0.02   | 0.02   | -0.08 | 1.00E+00 | no |
| Gm12359       | 2.05   | 1.94   | -0.08 | 1.00E+00 | no |
| Btbd6         | 8.83   | 8.34   | -0.08 | 1.00E+00 | no |
| Purg          | 2.79   | 2.63   | -0.09 | 1.00E+00 | no |
| Tmem33        | 14.71  | 13.86  | -0.09 | 1.00E+00 | no |
| Ralbp1        | 37.15  | 34.99  | -0.09 | 1.00E+00 | no |
| Crem          | 5.50   | 5.18   | -0.09 | 1.00E+00 | no |
| Clec1b        | 0.06   | 0.06   | -0.09 | 1.00E+00 | no |
| Psmc10        | 15.67  | 14.74  | -0.09 | 1.00E+00 | no |
| Lrrn2         | 0.02   | 0.02   | -0.09 | 1.00E+00 | no |
| Map2k4        | 16.14  | 15.17  | -0.09 | 1.00E+00 | no |
| Btf3          | 131.98 | 123.97 | -0.09 | 1.00E+00 | no |
| Pcdhga6       | 0.26   | 0.24   | -0.09 | 1.00E+00 | no |

|              |       |       |       |          |    |
|--------------|-------|-------|-------|----------|----|
| Bre          | 23.19 | 21.76 | -0.09 | 1.00E+00 | no |
| Mtmr7        | 0.27  | 0.25  | -0.09 | 1.00E+00 | no |
| U05342,Zfp91 | 0.24  | 0.22  | -0.09 | 1.00E+00 | no |
| Pdlim5       | 6.37  | 5.97  | -0.09 | 1.00E+00 | no |
| Dnahc10      | 0.01  | 0.01  | -0.09 | 1.00E+00 | no |
| Il1rap       | 4.29  | 4.02  | -0.10 | 1.00E+00 | no |
| 1700034H14Ri | 16.51 | 15.45 | -0.10 | 1.00E+00 | no |
| Tekt5        | 0.06  | 0.05  | -0.10 | 1.00E+00 | no |
| Wdr37        | 17.82 | 16.65 | -0.10 | 1.00E+00 | no |
| Pex11b       | 19.46 | 18.18 | -0.10 | 1.00E+00 | no |
| Ola1         | 34.95 | 32.64 | -0.10 | 1.00E+00 | no |
| Rrbp1        | 16.67 | 15.56 | -0.10 | 1.00E+00 | no |
| Chchd7       | 19.97 | 18.64 | -0.10 | 1.00E+00 | no |
| Nrp          | 1.51  | 1.41  | -0.10 | 1.00E+00 | no |
| Homer3       | 14.42 | 13.45 | -0.10 | 1.00E+00 | no |
| Pex19        | 19.80 | 18.45 | -0.10 | 1.00E+00 | no |
| Ash2l        | 27.48 | 25.60 | -0.10 | 1.00E+00 | no |
| Aebp2        | 26.17 | 24.34 | -0.10 | 1.00E+00 | no |
| Nt5c2        | 39.53 | 36.75 | -0.11 | 1.00E+00 | no |
| Olfml2a      | 0.03  | 0.03  | -0.11 | 1.00E+00 | no |
| Ate1         | 15.46 | 14.36 | -0.11 | 1.00E+00 | no |
| Spna2        | 34.16 | 31.71 | -0.11 | 1.00E+00 | no |
| Cep97        | 13.07 | 12.12 | -0.11 | 1.00E+00 | no |
| Dnm1l        | 27.33 | 25.33 | -0.11 | 1.00E+00 | no |
| Col4a1       | 0.01  | 0.01  | -0.11 | 1.00E+00 | no |
| Grhl3        | 0.02  | 0.02  | -0.11 | 1.00E+00 | no |
| Golph3l      | 24.62 | 22.79 | -0.11 | 1.00E+00 | no |
| 1110001A16Ri | 5.02  | 4.64  | -0.11 | 1.00E+00 | no |
| Vamp5        | 6.52  | 6.03  | -0.11 | 1.00E+00 | no |
| 1810006K21Ri | 51.64 | 47.77 | -0.11 | 1.00E+00 | no |
| Ccdc55       | 10.63 | 9.82  | -0.11 | 1.00E+00 | no |
| 1700112E06Ri | 0.08  | 0.08  | -0.12 | 1.00E+00 | no |
| Cerkl        | 1.03  | 0.95  | -0.12 | 1.00E+00 | no |
| Asph         | 1.72  | 1.59  | -0.12 | 1.00E+00 | no |
| Nt5c3l       | 26.15 | 24.11 | -0.12 | 1.00E+00 | no |
| 2810002N01Ri | 19.75 | 18.19 | -0.12 | 1.00E+00 | no |
| Ttc28        | 1.89  | 1.74  | -0.12 | 1.00E+00 | no |
| Gng3         | 0.71  | 0.65  | -0.12 | 1.00E+00 | no |
| Cep170       | 19.00 | 17.49 | -0.12 | 1.00E+00 | no |
| 0610039K10Ri | 4.20  | 3.87  | -0.12 | 1.00E+00 | no |
| Ecm2         | 0.22  | 0.20  | -0.12 | 1.00E+00 | no |
| Pnpla3       | 0.02  | 0.02  | -0.12 | 1.00E+00 | no |

|              |        |        |       |          |    |
|--------------|--------|--------|-------|----------|----|
| Arl2bp       | 44.96  | 41.30  | -0.12 | 1.00E+00 | no |
| Slc24a1      | 0.01   | 0.01   | -0.12 | 1.00E+00 | no |
| Mpp4         | 0.10   | 0.09   | -0.13 | 1.00E+00 | no |
| Ttc14        | 24.62  | 22.56  | -0.13 | 1.00E+00 | no |
| EU599041     | 0.06   | 0.06   | -0.13 | 1.00E+00 | no |
| Rcan1        | 4.93   | 4.51   | -0.13 | 1.00E+00 | no |
| 0610007P08Ri | 11.13  | 10.19  | -0.13 | 1.00E+00 | no |
| Copz2        | 0.08   | 0.07   | -0.13 | 1.00E+00 | no |
| 1110034B05Ri | 6.65   | 6.09   | -0.13 | 1.00E+00 | no |
| 1190007F08Ri | 0.08   | 0.07   | -0.13 | 1.00E+00 | no |
| Gpr30        | 0.16   | 0.14   | -0.13 | 1.00E+00 | no |
| Fam50b       | 0.05   | 0.05   | -0.13 | 1.00E+00 | no |
| Trps1        | 2.72   | 2.48   | -0.13 | 1.00E+00 | no |
| Gm5072       | 0.07   | 0.06   | -0.13 | 1.00E+00 | no |
| Magi1        | 0.23   | 0.21   | -0.13 | 1.00E+00 | no |
| Snrpn        | 0.04   | 0.04   | -0.14 | 1.00E+00 | no |
| Pcgf2        | 1.95   | 1.77   | -0.14 | 1.00E+00 | no |
| Col12a1      | 0.01   | 0.01   | -0.14 | 1.00E+00 | no |
| 2610101N10Ri | 27.00  | 24.53  | -0.14 | 1.00E+00 | no |
| Dcaf17       | 8.37   | 7.60   | -0.14 | 1.00E+00 | no |
| Tmprss2      | 0.03   | 0.02   | -0.14 | 1.00E+00 | no |
| Pop1         | 9.24   | 8.38   | -0.14 | 1.00E+00 | no |
| Rpl35        | 228.09 | 206.72 | -0.14 | 1.00E+00 | no |
| Lck          | 34.88  | 31.60  | -0.14 | 1.00E+00 | no |
| Tiam1        | 14.07  | 12.73  | -0.14 | 1.00E+00 | no |
| Csrp2bp      | 22.14  | 20.02  | -0.14 | 1.00E+00 | no |
| Pus1         | 24.16  | 21.80  | -0.15 | 1.00E+00 | no |
| Fau          | 612.50 | 552.12 | -0.15 | 1.00E+00 | no |
| Copg         | 25.71  | 23.17  | -0.15 | 1.00E+00 | no |
| Fars2        | 9.86   | 8.88   | -0.15 | 1.00E+00 | no |
| Txnl4a       | 62.09  | 55.88  | -0.15 | 1.00E+00 | no |
| Zkscan1      | 9.31   | 8.37   | -0.16 | 1.00E+00 | no |
| Pigk         | 8.59   | 7.71   | -0.16 | 1.00E+00 | no |
| Eif3a        | 68.42  | 61.35  | -0.16 | 1.00E+00 | no |
| Tsnax        | 30.37  | 27.23  | -0.16 | 1.00E+00 | no |
| Slco3a1      | 1.54   | 1.38   | -0.16 | 1.00E+00 | no |
| Bcat1        | 11.45  | 10.25  | -0.16 | 1.00E+00 | no |
| Ppm1b        | 42.48  | 38.03  | -0.16 | 1.00E+00 | no |
| Gm6649       | 1.41   | 1.26   | -0.16 | 1.00E+00 | no |
| Timm22       | 12.11  | 10.84  | -0.16 | 1.00E+00 | no |
| 2310014H01Ri | 68.80  | 61.56  | -0.16 | 1.00E+00 | no |
| Fam118b      | 13.20  | 11.78  | -0.16 | 1.00E+00 | no |



|              |       |       |       |          |    |
|--------------|-------|-------|-------|----------|----|
| 0610010K14Ri | 45.73 | 40.83 | -0.16 | 1.00E+00 | no |
| Prss8        | 0.02  | 0.02  | -0.16 | 1.00E+00 | no |
| Ctdsp1       | 43.11 | 38.44 | -0.17 | 1.00E+00 | no |
| Pafah1b1     | 53.57 | 47.75 | -0.17 | 1.00E+00 | no |
| Phf14        | 27.73 | 24.72 | -0.17 | 1.00E+00 | no |
| Nfyc         | 37.93 | 33.81 | -0.17 | 1.00E+00 | no |
| Nsun6        | 4.99  | 4.45  | -0.17 | 1.00E+00 | no |
| Fcgbp        | 0.01  | 0.00  | -0.17 | 1.00E+00 | no |
| Dbi          | 45.35 | 40.35 | -0.17 | 1.00E+00 | no |
| Dos          | 2.39  | 2.13  | -0.17 | 1.00E+00 | no |
| Syce1l       | 0.04  | 0.04  | -0.17 | 1.00E+00 | no |
| Wiz          | 23.41 | 20.81 | -0.17 | 1.00E+00 | no |
| Smad5        | 25.83 | 22.96 | -0.17 | 1.00E+00 | no |
| Psd3         | 3.29  | 2.93  | -0.17 | 1.00E+00 | no |
| Snx27        | 21.48 | 19.06 | -0.17 | 1.00E+00 | no |
| Ghitm        | 45.51 | 40.38 | -0.17 | 1.00E+00 | no |
| Pde4b        | 32.00 | 28.37 | -0.17 | 1.00E+00 | no |
| Prpf31       | 21.39 | 18.96 | -0.17 | 1.00E+00 | no |
| Dcun1d2      | 8.58  | 7.60  | -0.17 | 1.00E+00 | no |
| Dusp19       | 6.87  | 6.08  | -0.18 | 1.00E+00 | no |
| Ercc1        | 11.64 | 10.29 | -0.18 | 1.00E+00 | no |
| Dars         | 39.49 | 34.92 | -0.18 | 1.00E+00 | no |
| G3bp2        | 53.33 | 47.12 | -0.18 | 1.00E+00 | no |
| Fndc3b       | 2.16  | 1.91  | -0.18 | 1.00E+00 | no |
| Plekha6      | 0.14  | 0.13  | -0.18 | 1.00E+00 | no |
| Ankrd40      | 29.48 | 26.01 | -0.18 | 1.00E+00 | no |
| Tasp1        | 4.68  | 4.13  | -0.18 | 1.00E+00 | no |
| Polr3e       | 10.70 | 9.43  | -0.18 | 1.00E+00 | no |
| Pilra        | 0.17  | 0.15  | -0.18 | 1.00E+00 | no |
| Ablim1       | 63.67 | 56.05 | -0.18 | 1.00E+00 | no |
| Gphn         | 14.87 | 13.09 | -0.18 | 1.00E+00 | no |
| Mark2        | 34.94 | 30.73 | -0.19 | 1.00E+00 | no |
| Phf8         | 17.90 | 15.74 | -0.19 | 1.00E+00 | no |
| Wdr82        | 40.20 | 35.34 | -0.19 | 1.00E+00 | no |
| Ppp2r5c      | 59.54 | 52.34 | -0.19 | 1.00E+00 | no |
| Rcl1         | 18.08 | 15.87 | -0.19 | 1.00E+00 | no |
| Lins         | 3.07  | 2.69  | -0.19 | 1.00E+00 | no |
| Gm3258       | 35.68 | 31.25 | -0.19 | 1.00E+00 | no |
| Pnkd         | 17.92 | 15.67 | -0.19 | 1.00E+00 | no |
| Dnajb6       | 33.72 | 29.48 | -0.19 | 1.00E+00 | no |
| Zc3h14       | 37.42 | 32.71 | -0.19 | 1.00E+00 | no |
| Dis3l        | 11.24 | 9.82  | -0.19 | 1.00E+00 | no |

|              |        |        |       |          |    |
|--------------|--------|--------|-------|----------|----|
| Prepl        | 10.46  | 9.14   | -0.19 | 1.00E+00 | no |
| Lims1        | 28.40  | 24.80  | -0.20 | 1.00E+00 | no |
| Dusp16       | 4.74   | 4.13   | -0.20 | 1.00E+00 | no |
| Vav1         | 39.32  | 34.27  | -0.20 | 1.00E+00 | no |
| Cul4b        | 28.43  | 24.78  | -0.20 | 1.00E+00 | no |
| Syce2        | 14.55  | 12.68  | -0.20 | 1.00E+00 | no |
| 9330182L06Ri | 0.22   | 0.19   | -0.20 | 1.00E+00 | no |
| Fytd1        | 17.90  | 15.53  | -0.20 | 1.00E+00 | no |
| Rpl13        | 6.84   | 5.93   | -0.21 | 1.00E+00 | no |
| Acbd5        | 13.57  | 11.76  | -0.21 | 1.00E+00 | no |
| Otud7b       | 11.28  | 9.77   | -0.21 | 1.00E+00 | no |
| 1700019G17Ri | 2.46   | 2.13   | -0.21 | 1.00E+00 | no |
| Kcnh3        | 0.01   | 0.01   | -0.21 | 1.00E+00 | no |
| Klhl15       | 4.77   | 4.13   | -0.21 | 1.00E+00 | no |
| 2210009G21Ri | 8.62   | 7.46   | -0.21 | 1.00E+00 | no |
| 6430562O15Ri | 0.24   | 0.21   | -0.21 | 1.00E+00 | no |
| Esrrb        | 0.32   | 0.28   | -0.22 | 1.00E+00 | no |
| Hadhb        | 41.34  | 35.56  | -0.22 | 1.00E+00 | no |
| D14Abb1e     | 22.20  | 19.09  | -0.22 | 1.00E+00 | no |
| Pigu         | 21.04  | 18.09  | -0.22 | 1.00E+00 | no |
| 2310022A10Ri | 16.92  | 14.53  | -0.22 | 1.00E+00 | no |
| Cflar        | 19.53  | 16.77  | -0.22 | 1.00E+00 | no |
| R3hdm1       | 27.96  | 23.99  | -0.22 | 1.00E+00 | no |
| Hbs1l        | 42.24  | 36.21  | -0.22 | 1.00E+00 | no |
| Ccnc         | 12.78  | 10.94  | -0.22 | 1.00E+00 | no |
| Trpc2        | 10.44  | 8.94   | -0.22 | 1.00E+00 | no |
| Wdr33        | 27.16  | 23.22  | -0.23 | 1.00E+00 | no |
| Romo1        | 46.49  | 39.73  | -0.23 | 1.00E+00 | no |
| Copz1        | 50.14  | 42.82  | -0.23 | 1.00E+00 | no |
| Ctage5       | 19.86  | 16.95  | -0.23 | 1.00E+00 | no |
| Brd4         | 48.85  | 41.67  | -0.23 | 1.00E+00 | no |
| Prkag2       | 8.16   | 6.96   | -0.23 | 1.00E+00 | no |
| Slc25a14     | 3.61   | 3.08   | -0.23 | 1.00E+00 | no |
| A230073K19Ri | 0.24   | 0.20   | -0.23 | 1.00E+00 | no |
| Zmym3        | 17.49  | 14.89  | -0.23 | 1.00E+00 | no |
| Sap25        | 6.12   | 5.20   | -0.23 | 1.00E+00 | no |
| Pdss2        | 5.26   | 4.47   | -0.24 | 1.00E+00 | no |
| Suds3        | 31.00  | 26.31  | -0.24 | 1.00E+00 | no |
| Snx7         | 0.47   | 0.40   | -0.24 | 1.00E+00 | no |
| Arf1         | 148.05 | 125.58 | -0.24 | 1.00E+00 | no |
| 2-Sep        | 51.93  | 44.02  | -0.24 | 1.00E+00 | no |
| Mapk6        | 29.11  | 24.67  | -0.24 | 1.00E+00 | no |

|           |       |       |       |          |    |
|-----------|-------|-------|-------|----------|----|
| Brdt      | 0.91  | 0.77  | -0.24 | 1.00E+00 | no |
| Lrrc14b   | 0.92  | 0.78  | -0.24 | 1.00E+00 | no |
| Mrps2     | 21.01 | 17.78 | -0.24 | 1.00E+00 | no |
| Hnrnpa1   | 23.09 | 19.53 | -0.24 | 1.00E+00 | no |
| Pxk       | 26.22 | 22.17 | -0.24 | 1.00E+00 | no |
| Ndufs5    | 50.72 | 42.86 | -0.24 | 1.00E+00 | no |
| Smg7      | 35.48 | 29.86 | -0.25 | 1.00E+00 | no |
| Atp5c1    | 92.42 | 77.75 | -0.25 | 1.00E+00 | no |
| BC002163  | 40.68 | 34.22 | -0.25 | 1.00E+00 | no |
| Inpp5b    | 13.53 | 11.37 | -0.25 | 1.00E+00 | no |
| Tor1aip1  | 32.61 | 27.39 | -0.25 | 1.00E+00 | no |
| Rmi1      | 17.34 | 14.56 | -0.25 | 1.00E+00 | no |
| Fiz1      | 25.15 | 21.12 | -0.25 | 1.00E+00 | no |
| Mpp7      | 4.80  | 4.03  | -0.25 | 1.00E+00 | no |
| Rnu7      | 1.32  | 1.11  | -0.25 | 1.00E+00 | no |
| Rpl30     | 9.87  | 8.27  | -0.25 | 1.00E+00 | no |
| Pfkfb3    | 40.52 | 33.92 | -0.26 | 1.00E+00 | no |
| H2-Ke2    | 45.91 | 38.39 | -0.26 | 1.00E+00 | no |
| Dnajc24   | 8.58  | 7.17  | -0.26 | 1.00E+00 | no |
| Arhgef17  | 0.34  | 0.28  | -0.26 | 1.00E+00 | no |
| Polr2b    | 36.67 | 30.57 | -0.26 | 1.00E+00 | no |
| Eif4enif1 | 35.26 | 29.36 | -0.26 | 1.00E+00 | no |
| Gjc2      | 0.38  | 0.32  | -0.26 | 1.00E+00 | no |
| Lrrc57    | 8.65  | 7.20  | -0.26 | 1.00E+00 | no |
| Snx22     | 1.82  | 1.52  | -0.27 | 1.00E+00 | no |
| BC003331  | 10.77 | 8.96  | -0.27 | 1.00E+00 | no |
| Arpc4     | 78.43 | 65.20 | -0.27 | 1.00E+00 | no |
| Cdk17     | 22.43 | 18.64 | -0.27 | 1.00E+00 | no |
| Rapgef1   | 33.35 | 27.69 | -0.27 | 1.00E+00 | no |
| Akt1      | 64.59 | 53.49 | -0.27 | 1.00E+00 | no |
| Pi4k2b    | 8.47  | 7.00  | -0.28 | 1.00E+00 | no |
| Zfp385c   | 0.03  | 0.03  | -0.28 | 1.00E+00 | no |
| Tmem93    | 29.70 | 24.51 | -0.28 | 1.00E+00 | no |
| Eya3      | 21.51 | 17.70 | -0.28 | 1.00E+00 | no |
| P2rx7     | 0.62  | 0.51  | -0.28 | 1.00E+00 | no |
| Nrf1      | 32.23 | 26.46 | -0.28 | 1.00E+00 | no |
| Fam116a   | 21.18 | 17.38 | -0.29 | 1.00E+00 | no |
| Csf1      | 2.30  | 1.89  | -0.29 | 1.00E+00 | no |
| Dhx15     | 83.07 | 68.07 | -0.29 | 1.00E+00 | no |
| Lrba      | 9.21  | 7.54  | -0.29 | 1.00E+00 | no |
| Smarcc2   | 48.61 | 39.71 | -0.29 | 1.00E+00 | no |
| Wdr36     | 27.82 | 22.70 | -0.29 | 1.00E+00 | no |

|               |        |       |       |          |    |
|---------------|--------|-------|-------|----------|----|
| Spag7         | 24.94  | 20.33 | -0.30 | 1.00E+00 | no |
| Pja1          | 8.46   | 6.90  | -0.30 | 1.00E+00 | no |
| Ece2          | 11.30  | 9.19  | -0.30 | 1.00E+00 | no |
| Aimp2         | 28.68  | 23.34 | -0.30 | 1.00E+00 | no |
| Caprin1       | 106.96 | 86.88 | -0.30 | 1.00E+00 | no |
| Nol9          | 24.00  | 19.44 | -0.30 | 1.00E+00 | no |
| E130317F20Ril | 2.02   | 1.64  | -0.30 | 1.00E+00 | no |
| Apoo          | 10.32  | 8.35  | -0.31 | 1.00E+00 | no |
| Dctd          | 8.78   | 7.11  | -0.31 | 1.00E+00 | no |
| Zfp2          | 1.31   | 1.06  | -0.31 | 1.00E+00 | no |
| Pvrl2         | 0.22   | 0.18  | -0.31 | 1.00E+00 | no |
| Cstf3         | 26.03  | 21.03 | -0.31 | 1.00E+00 | no |
| Seh1l         | 38.01  | 30.70 | -0.31 | 1.00E+00 | no |
| Mpp6          | 23.02  | 18.58 | -0.31 | 1.00E+00 | no |
| Cd163         | 0.32   | 0.26  | -0.31 | 1.00E+00 | no |
| Dclre1b       | 11.40  | 9.18  | -0.31 | 1.00E+00 | no |
| Ndr3          | 16.81  | 13.50 | -0.32 | 1.00E+00 | no |
| Smg6          | 23.03  | 18.49 | -0.32 | 1.00E+00 | no |
| Nploc4        | 24.80  | 19.83 | -0.32 | 1.00E+00 | no |
| Rgs12         | 16.86  | 13.48 | -0.32 | 1.00E+00 | no |
| Fnbp1l        | 2.86   | 2.28  | -0.32 | 1.00E+00 | no |
| Tssk4         | 2.89   | 2.30  | -0.33 | 1.00E+00 | no |
| Trmt2b        | 19.87  | 15.85 | -0.33 | 1.00E+00 | no |
| Pigw          | 6.38   | 5.09  | -0.33 | 1.00E+00 | no |
| Rbm10         | 33.42  | 26.64 | -0.33 | 1.00E+00 | no |
| Gm2518        | 0.40   | 0.32  | -0.33 | 1.00E+00 | no |
| Nme7          | 13.46  | 10.71 | -0.33 | 1.00E+00 | no |
| Nsmce2        | 22.44  | 17.85 | -0.33 | 1.00E+00 | no |
| Lpar5         | 5.00   | 3.98  | -0.33 | 1.00E+00 | no |
| Arhgef10l     | 0.30   | 0.24  | -0.33 | 1.00E+00 | no |
| Bnip2         | 49.03  | 38.88 | -0.33 | 1.00E+00 | no |
| Tcf7          | 23.94  | 18.98 | -0.33 | 1.00E+00 | no |
| Nup62-il4i1   | 2.40   | 1.89  | -0.35 | 1.00E+00 | no |
| Tpm1          | 15.52  | 12.18 | -0.35 | 1.00E+00 | no |
| Dtwd2         | 2.27   | 1.78  | -0.35 | 1.00E+00 | no |
| Prr5l         | 0.20   | 0.16  | -0.35 | 1.00E+00 | no |
| 5730419I09Rik | 37.69  | 29.52 | -0.35 | 1.00E+00 | no |
| Ctbp1         | 98.45  | 76.98 | -0.36 | 1.00E+00 | no |
| Fitm2         | 3.09   | 2.41  | -0.36 | 1.00E+00 | no |
| Nxt1          | 38.03  | 29.68 | -0.36 | 1.00E+00 | no |
| Cdyl          | 8.87   | 6.92  | -0.36 | 1.00E+00 | no |
| Tmem70        | 21.78  | 16.99 | -0.36 | 1.00E+00 | no |

|               |        |        |       |          |    |
|---------------|--------|--------|-------|----------|----|
| Raet1d        | 1.22   | 0.95   | -0.36 | 1.00E+00 | no |
| Fgf13         | 12.75  | 9.90   | -0.37 | 1.00E+00 | no |
| Fam134b       | 24.01  | 18.64  | -0.37 | 1.00E+00 | no |
| Magi3         | 6.67   | 5.16   | -0.37 | 1.00E+00 | no |
| Usp2          | 2.52   | 1.95   | -0.37 | 1.00E+00 | no |
| Rtn3          | 66.49  | 51.44  | -0.37 | 1.00E+00 | no |
| Scmh1         | 25.33  | 19.58  | -0.37 | 1.00E+00 | no |
| Kif2a         | 24.88  | 19.22  | -0.37 | 1.00E+00 | no |
| B020018G12Ri  | 17.91  | 13.83  | -0.37 | 1.00E+00 | no |
| Casp9         | 7.07   | 5.45   | -0.38 | 1.00E+00 | no |
| Usp14         | 22.56  | 17.37  | -0.38 | 1.00E+00 | no |
| Tfpi          | 6.61   | 5.08   | -0.38 | 1.00E+00 | no |
| Smpd4         | 26.83  | 20.59  | -0.38 | 1.00E+00 | no |
| Ptbp1         | 165.14 | 126.62 | -0.38 | 1.00E+00 | no |
| Fam118a       | 8.20   | 6.28   | -0.38 | 1.00E+00 | no |
| Tomm5         | 60.91  | 46.63  | -0.39 | 1.00E+00 | no |
| Bcl2          | 3.50   | 2.67   | -0.39 | 1.00E+00 | no |
| Smc4          | 91.36  | 69.78  | -0.39 | 1.00E+00 | no |
| Dpy30         | 44.54  | 34.01  | -0.39 | 1.00E+00 | no |
| Gnas          | 225.31 | 172.04 | -0.39 | 1.00E+00 | no |
| A130049A11Ri  | 1.37   | 1.04   | -0.39 | 1.00E+00 | no |
| Prkd3         | 34.97  | 26.66  | -0.39 | 1.00E+00 | no |
| Eif4a1        | 299.04 | 227.97 | -0.39 | 1.00E+00 | no |
| Tssc4         | 30.49  | 23.21  | -0.39 | 1.00E+00 | no |
| Rdx           | 51.66  | 39.31  | -0.39 | 1.00E+00 | no |
| D330050I16Ril | 1.28   | 0.97   | -0.40 | 1.00E+00 | no |
| Msr1          | 0.26   | 0.19   | -0.40 | 1.00E+00 | no |
| Hmbs          | 17.14  | 12.92  | -0.41 | 1.00E+00 | no |
| Med8          | 19.34  | 14.57  | -0.41 | 1.00E+00 | no |
| Slc25a25      | 9.67   | 7.27   | -0.41 | 1.00E+00 | no |
| Morf4l2       | 99.48  | 74.80  | -0.41 | 1.00E+00 | no |
| Larp7         | 40.79  | 30.63  | -0.41 | 1.00E+00 | no |
| Txndc11       | 32.83  | 24.64  | -0.41 | 1.00E+00 | no |
| Otub2         | 45.95  | 34.39  | -0.42 | 1.00E+00 | no |
| Col7a1        | 0.36   | 0.27   | -0.42 | 1.00E+00 | no |
| Tardbp        | 99.29  | 74.19  | -0.42 | 1.00E+00 | no |
| Nol11         | 20.40  | 15.23  | -0.42 | 1.00E+00 | no |
| Sfmbt1        | 11.79  | 8.78   | -0.43 | 1.00E+00 | no |
| 2810006K23Ri  | 9.19   | 6.84   | -0.43 | 1.00E+00 | no |
| Pcdhga9       | 0.59   | 0.44   | -0.43 | 1.00E+00 | no |
| Dap3          | 13.16  | 9.79   | -0.43 | 1.00E+00 | no |
| Mrpl1         | 9.17   | 6.81   | -0.43 | 1.00E+00 | no |

|               |        |        |       |          |    |
|---------------|--------|--------|-------|----------|----|
| Itns1         | 1.54   | 1.15   | -0.43 | 1.00E+00 | no |
| BC005764      | 8.09   | 6.01   | -0.43 | 1.00E+00 | no |
| 6430550D23Ri  | 0.55   | 0.41   | -0.43 | 1.00E+00 | no |
| Banf1         | 115.51 | 85.58  | -0.43 | 1.00E+00 | no |
| Pacsin2       | 27.41  | 20.29  | -0.43 | 1.00E+00 | no |
| Eif5a         | 419.10 | 309.96 | -0.44 | 1.00E+00 | no |
| Lmln          | 1.70   | 1.25   | -0.44 | 1.00E+00 | no |
| Epb4.1        | 23.13  | 17.01  | -0.44 | 1.00E+00 | no |
| C530005A16Ri  | 1.35   | 0.99   | -0.45 | 1.00E+00 | no |
| Alkbh7        | 9.62   | 7.03   | -0.45 | 1.00E+00 | no |
| Gtf2a1        | 15.60  | 11.36  | -0.46 | 1.00E+00 | no |
| St8sia4       | 38.86  | 28.20  | -0.46 | 1.00E+00 | no |
| Kbtbd8        | 5.37   | 3.89   | -0.47 | 1.00E+00 | no |
| Pvr13         | 1.47   | 1.06   | -0.47 | 1.00E+00 | no |
| Fancb         | 8.12   | 5.87   | -0.47 | 1.00E+00 | no |
| Ramp1         | 19.22  | 13.88  | -0.47 | 1.00E+00 | no |
| Kcnrg         | 2.59   | 1.87   | -0.47 | 1.00E+00 | no |
| Ppih          | 19.72  | 14.20  | -0.47 | 1.00E+00 | no |
| Nup35         | 7.27   | 5.23   | -0.47 | 1.00E+00 | no |
| Asap2         | 2.56   | 1.84   | -0.48 | 1.00E+00 | no |
| 5730494M16R   | 7.86   | 5.64   | -0.48 | 1.00E+00 | no |
| Rpa1          | 60.78  | 43.53  | -0.48 | 1.00E+00 | no |
| Tufm          | 64.39  | 46.08  | -0.48 | 1.00E+00 | no |
| Gngt2         | 30.59  | 21.84  | -0.49 | 1.00E+00 | no |
| Bcl2l11       | 13.81  | 9.85   | -0.49 | 1.00E+00 | no |
| Haus6         | 20.18  | 14.33  | -0.49 | 1.00E+00 | no |
| Nol10         | 11.75  | 8.34   | -0.50 | 1.00E+00 | no |
| Exosc1        | 19.36  | 13.68  | -0.50 | 1.00E+00 | no |
| Nde1          | 59.01  | 41.61  | -0.50 | 1.00E+00 | no |
| Pacsin3       | 0.54   | 0.38   | -0.51 | 1.00E+00 | no |
| Dnaja1        | 39.52  | 27.66  | -0.51 | 1.00E+00 | no |
| Orc2          | 26.43  | 18.42  | -0.52 | 1.00E+00 | no |
| Egfl7         | 13.45  | 9.35   | -0.52 | 1.00E+00 | no |
| 1700040I03Rik | 14.59  | 10.11  | -0.53 | 1.00E+00 | no |
| Ldha          | 88.91  | 61.54  | -0.53 | 1.00E+00 | no |
| Gtf2e2        | 28.20  | 19.46  | -0.54 | 1.00E+00 | no |
| Dnmt1         | 99.10  | 68.19  | -0.54 | 1.00E+00 | no |
| Gpr19         | 5.00   | 3.43   | -0.54 | 1.00E+00 | no |
| Camta1        | 4.50   | 3.08   | -0.55 | 1.00E+00 | no |
| Eif4e         | 48.05  | 32.89  | -0.55 | 1.00E+00 | no |
| Odf2          | 51.43  | 35.04  | -0.55 | 1.00E+00 | no |
| Taf7          | 13.52  | 9.19   | -0.56 | 1.00E+00 | no |

|              |        |        |       |          |    |
|--------------|--------|--------|-------|----------|----|
| Col27a1      | 4.85   | 3.30   | -0.56 | 1.00E+00 | no |
| Lin9         | 17.79  | 12.08  | -0.56 | 1.00E+00 | no |
| Npff         | 5.34   | 3.62   | -0.56 | 1.00E+00 | no |
| Cacna1d      | 0.38   | 0.26   | -0.56 | 1.00E+00 | no |
| Dbndd2       | 0.96   | 0.65   | -0.56 | 1.00E+00 | no |
| Ncapd2       | 91.20  | 61.57  | -0.57 | 1.00E+00 | no |
| Pabpc4       | 21.86  | 14.70  | -0.57 | 1.00E+00 | no |
| Nedd4l       | 5.72   | 3.84   | -0.57 | 1.00E+00 | no |
| Rnls         | 3.55   | 2.36   | -0.59 | 1.00E+00 | no |
| Tpst1        | 15.32  | 10.19  | -0.59 | 1.00E+00 | no |
| Gins1        | 33.85  | 22.49  | -0.59 | 1.00E+00 | no |
| Fam33a       | 38.13  | 25.25  | -0.59 | 1.00E+00 | no |
| Mdk          | 1.34   | 0.89   | -0.60 | 1.00E+00 | no |
| Skap1        | 2.37   | 1.56   | -0.60 | 1.00E+00 | no |
| Agtppbp1     | 10.86  | 7.15   | -0.60 | 1.00E+00 | no |
| Nxt2         | 7.88   | 5.18   | -0.60 | 1.00E+00 | no |
| Nptxr        | 0.16   | 0.10   | -0.62 | 1.00E+00 | no |
| Xylb         | 2.36   | 1.53   | -0.62 | 1.00E+00 | no |
| B230206H07Ri | 0.23   | 0.15   | -0.63 | 1.00E+00 | no |
| 1700029G01Ri | 0.15   | 0.10   | -0.63 | 1.00E+00 | no |
| Lig1         | 66.81  | 43.10  | -0.63 | 1.00E+00 | no |
| Ffar2        | 0.52   | 0.34   | -0.63 | 1.00E+00 | no |
| Tnfaip8      | 31.41  | 20.18  | -0.64 | 1.00E+00 | no |
| Cdkn1a       | 24.00  | 15.22  | -0.66 | 1.00E+00 | no |
| Islr2        | 0.48   | 0.31   | -0.66 | 1.00E+00 | no |
| Samd4        | 0.10   | 0.07   | -0.68 | 1.00E+00 | no |
| Tmpo         | 219.79 | 137.56 | -0.68 | 1.00E+00 | no |
| Tmem194      | 17.55  | 10.96  | -0.68 | 1.00E+00 | no |
| Cenpp        | 15.54  | 9.61   | -0.69 | 1.00E+00 | no |
| Btbd11       | 0.32   | 0.20   | -0.69 | 1.00E+00 | no |
| Zfp318       | 4.71   | 2.90   | -0.70 | 1.00E+00 | no |
| Prom1        | 0.31   | 0.19   | -0.71 | 1.00E+00 | no |
| Scin         | 2.86   | 1.75   | -0.71 | 1.00E+00 | no |
| Pdlim7       | 6.14   | 3.74   | -0.71 | 1.00E+00 | no |
| Chn1         | 0.07   | 0.04   | -0.71 | 1.00E+00 | no |
| Steap3       | 17.71  | 10.75  | -0.72 | 1.00E+00 | no |
| Rpl18a       | 2.40   | 1.45   | -0.73 | 1.00E+00 | no |
| Fmnl1        | 56.25  | 33.97  | -0.73 | 1.00E+00 | no |
| Whrn         | 5.60   | 3.38   | -0.73 | 1.00E+00 | no |
| Gm10857      | 2.62   | 1.57   | -0.74 | 1.00E+00 | no |
| Rassf4       | 5.06   | 3.02   | -0.74 | 1.00E+00 | no |
| BC024582     | 0.64   | 0.38   | -0.75 | 1.00E+00 | no |

|               |        |       |       |          |    |
|---------------|--------|-------|-------|----------|----|
| Mtl5          | 1.04   | 0.62  | -0.75 | 1.00E+00 | no |
| Blm           | 23.00  | 13.62 | -0.76 | 1.00E+00 | no |
| Atl2          | 36.40  | 21.54 | -0.76 | 1.00E+00 | no |
| Ect2          | 42.80  | 25.26 | -0.76 | 1.00E+00 | no |
| Cnp           | 104.93 | 61.52 | -0.77 | 1.00E+00 | no |
| G2e3          | 26.18  | 15.35 | -0.77 | 1.00E+00 | no |
| Ptprj         | 14.67  | 8.50  | -0.79 | 1.00E+00 | no |
| Plekhg1       | 0.27   | 0.15  | -0.80 | 1.00E+00 | no |
| Kif20a        | 46.88  | 26.60 | -0.82 | 1.00E+00 | no |
| Pcdhgc3       | 3.14   | 1.78  | -0.82 | 1.00E+00 | no |
| Pmch          | 1.61   | 0.89  | -0.85 | 1.00E+00 | no |
| Ddah2         | 26.56  | 14.66 | -0.86 | 1.00E+00 | no |
| Gm13308       | 0.19   | 0.10  | -0.87 | 1.00E+00 | no |
| Slc16a10      | 3.99   | 2.18  | -0.87 | 1.00E+00 | no |
| 9430060I03Rik | 0.29   | 0.16  | -0.87 | 1.00E+00 | no |
| Masp2         | 0.11   | 0.06  | -0.88 | 1.00E+00 | no |
| Mapre2        | 23.64  | 12.80 | -0.89 | 1.00E+00 | no |
| Cdc6          | 22.92  | 12.38 | -0.89 | 1.00E+00 | no |
| Hist1h2be     | 0.68   | 0.36  | -0.91 | 1.00E+00 | no |
| 3110009E18Ri  | 4.60   | 2.43  | -0.92 | 1.00E+00 | no |
| Fhl1          | 0.37   | 0.19  | -0.92 | 1.00E+00 | no |
| Sumo2         | 7.89   | 4.14  | -0.93 | 1.00E+00 | no |
| Cntf          | 3.82   | 2.00  | -0.93 | 1.00E+00 | no |
| Ctbp2         | 1.35   | 0.70  | -0.95 | 1.00E+00 | no |
| Map3k15       | 1.04   | 0.54  | -0.95 | 1.00E+00 | no |
| Myadm         | 12.42  | 6.41  | -0.95 | 1.00E+00 | no |
| Itgae         | 0.52   | 0.27  | -0.96 | 1.00E+00 | no |
| Myom1         | 0.12   | 0.06  | -0.97 | 1.00E+00 | no |
| Sema6b        | 0.34   | 0.17  | -0.99 | 1.00E+00 | no |
| Sypl          | 18.39  | 9.09  | -1.02 | 1.00E+00 | no |
| Kctd14        | 1.44   | 0.70  | -1.04 | 1.00E+00 | no |
| Gpr77         | 0.31   | 0.15  | -1.04 | 1.00E+00 | no |
| Acot7         | 19.96  | 9.57  | -1.06 | 1.00E+00 | no |
| Cd44          | 26.52  | 12.43 | -1.09 | 1.00E+00 | no |
| Pcdhgc4       | 2.17   | 0.99  | -1.13 | 1.00E+00 | no |
| Sgms1         | 14.80  | 6.54  | -1.18 | 1.00E+00 | no |
| Endou         | 11.28  | 4.99  | -1.18 | 1.00E+00 | no |
| Kbtbd12       | 0.58   | 0.26  | -1.18 | 1.00E+00 | no |
| Grip1         | 0.09   | 0.04  | -1.21 | 1.00E+00 | no |
| Tnnt2         | 4.35   | 1.87  | -1.22 | 1.00E+00 | no |
| Gpr155        | 11.85  | 5.04  | -1.24 | 1.00E+00 | no |
| Spata17       | 0.23   | 0.10  | -1.24 | 1.00E+00 | no |



|              |       |      |       |          |    |
|--------------|-------|------|-------|----------|----|
| Epb4.1l5     | 4.71  | 1.99 | -1.24 | 1.00E+00 | no |
| Atp6v1c2     | 0.10  | 0.04 | -1.31 | 1.00E+00 | no |
| 4933409K07Ri | 0.03  | 0.01 | -1.37 | 1.00E+00 | no |
| Mlf1         | 1.09  | 0.42 | -1.38 | 1.00E+00 | no |
| 10-Sep       | 3.26  | 1.20 | -1.45 | 1.00E+00 | no |
| Rbpms        | 16.84 | 6.11 | -1.46 | 1.00E+00 | no |
| St3gal5      | 5.64  | 2.03 | -1.47 | 1.00E+00 | no |
| Ddc          | 6.62  | 2.35 | -1.50 | 1.00E+00 | no |
| Fam70a       | 5.62  | 1.98 | -1.50 | 1.00E+00 | no |
| Eaf2         | 3.37  | 1.15 | -1.55 | 1.00E+00 | no |
| Gm13476      | 11.26 | 3.76 | -1.58 | 1.00E+00 | no |
| Ret          | 0.57  | 0.16 | -1.85 | 1.00E+00 | no |
| Itga9        | 2.79  | 0.75 | -1.90 | 1.00E+00 | no |
| Ogn          | 0.14  | 0.03 | -2.07 | 1.00E+00 | no |
| Npcd         | 0.28  | 0.06 | -2.31 | 1.00E+00 | no |
| Pcdhb12      | 0.05  | 0.01 | -2.38 | 1.00E+00 | no |
| Gm9846       | 1.65  | 0.01 | -7.12 | 1.00E+00 | no |
